# Supplementary material for: Understanding of Waggle Dance in the Honey Bee (Apis mellifera) from the Perspective of Long Non-Coding RNA
Source: MDPI journal article supplement (doi:10.3390/insects13020111), 2022-01-19
Supplement: s1 [file s1]

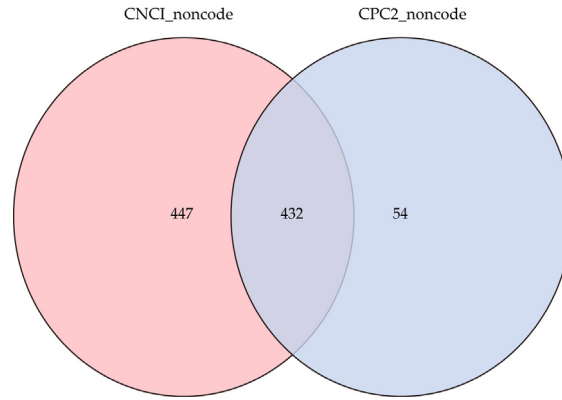

**Figure S1.** The novel long non-coding RNAs identified by the intersection of CNCI and CPC2. To ensure the reliability of predictive results, 432 novel long non-coding RNAs are defined by the intersection of CNCI (879) and CPC2 (486), which are used to examine the coding potential of transcripts.

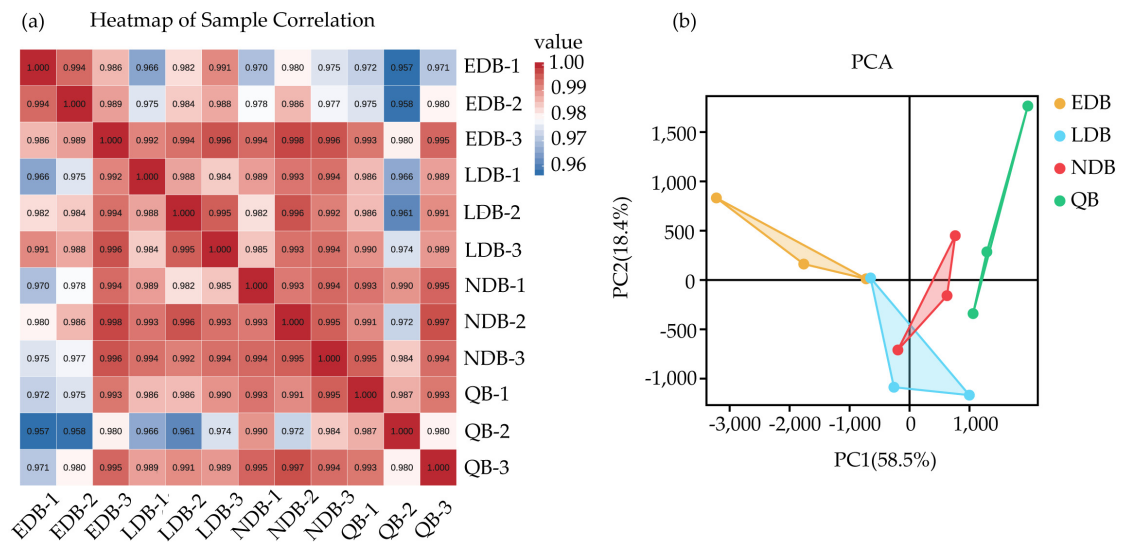

**Figure S2.** The correlation analysis of 12 samples from four groups of honey bee brains. (a) Heatmap of sample correlation. According to the expression amount of the whole lncRNA set in any two samples, the Pearson correlation coefficient between every two samples was calculated, and then the correlation between any two samples was intuitively displayed in the form of the heatmap. (b) Principal component analysis (PCA). The more similar the sample composition is, the closer the distance is reflected in the PCA diagram, and the samples from different treatments tend to show their aggregation distribution. Note: EDB referred to the wagging dancers after foraging on a feeder with 1.5 M sucrose solution in the first phase. NDB referred to the non-dancing bees after foraging on another feeder with 0.5 M sucrose solution replacing the feeder with 1.5 M sucrose solution in the second phase. LDB referred to the wagging dancers after foraging on the feeder with 1.5 M sucrose solution replacing the feeder with 0.5 M sucrose solution in the third phase. QB referred to quiescent bees on the comb after removing the feeder for 1 hour in the fourth phase.

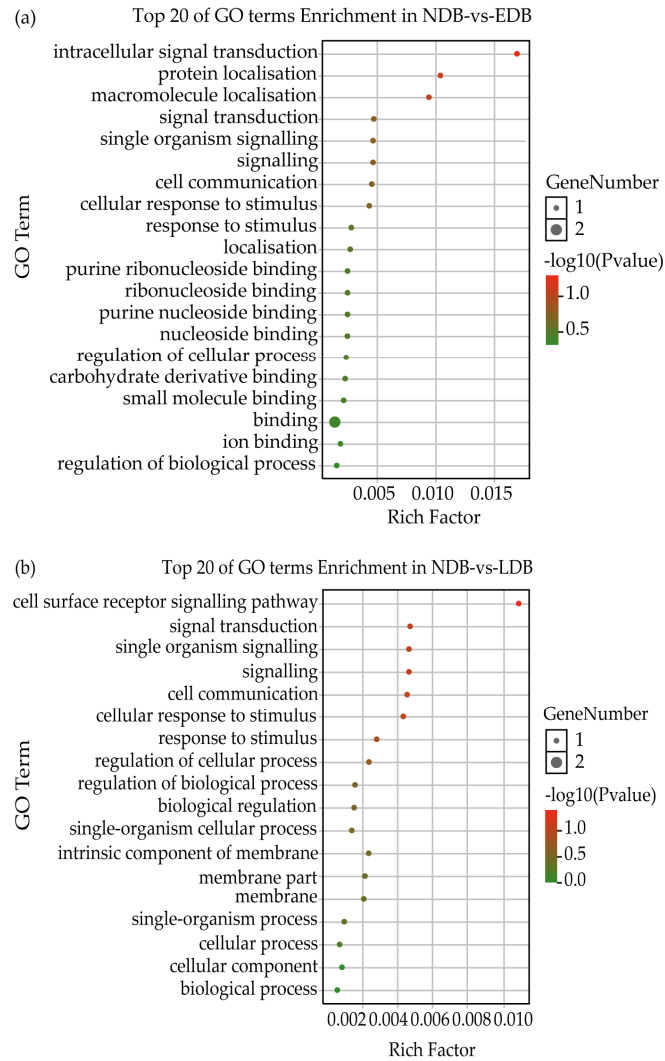

**Figure S3.** Top 20 of GO terms enrichment analysis of target genes regulated by DElncRNAs via the antisense regulatory mechanism in NDB-vs-EDB (a) and NDB-vs-LDB (b). Rich Factor refers to the ratio of the number of genes located at this term in the differentially expressed genes to the total number of genes located at this term in all genes. The larger Rich Factor is, the higher the enrichment degree is. The bubble size represents the number of genes, and the larger the bubble is, the more genes are enriched in this term. The depth of bubble color represents the level of significance, and the redder the color, the higher the significance of enrichment into this term. Note: EDB referred to the wagging dancers after foraging on a feeder with 1.5 M sucrose solution in the first phase. NDB referred to the non-dancing bees after foraging on another feeder with 0.5 M sucrose solution replacing the feeder with 1.5 M sucrose solution in the second phase. LDB referred to the wagging dancers after foraging on the feeder with 1.5 M sucrose solution replacing the feeder with 0.5 M sucrose solution in the third phase.

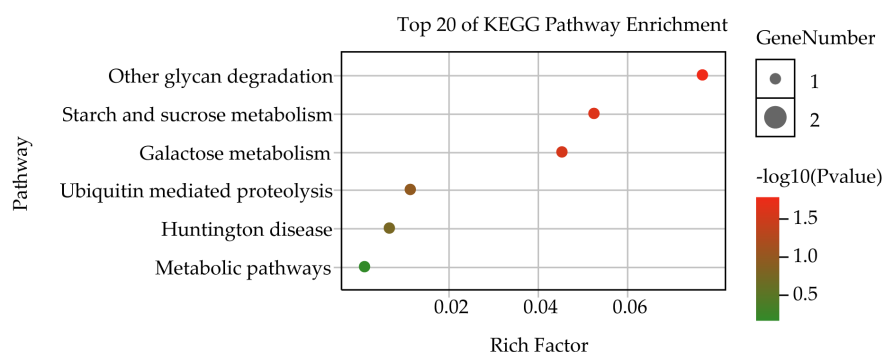

**Figure S4.** Top 20 of KEGG pathway enrichment analysis of target genes regulated by DElncRNAs via the antisense regulatory mechanism in NDB-vs-EDB. Rich Factor refers to the ratio of the number of genes located at this pathway in differentially expressed genes to the total number of genes located at this pathway in all genes. The larger Rich Factor is, the higher the enrichment degree is. The bubble size indicates the number of genes, and the larger the bubble is, the more genes are enriched in this pathway. The depth of bubble color indicated the level of significance, and the redder color, the higher the significance of enrichment into this pathway. Note: EDB referred to the wagging dancers after foraging on a feeder with 1.5 M sucrose solution in the first phase. NDB referred to the non-dancing bees after foraging on another feeder with 0.5 M sucrose solution replacing the feeder with 1.5 M sucrose solution in the second phase.

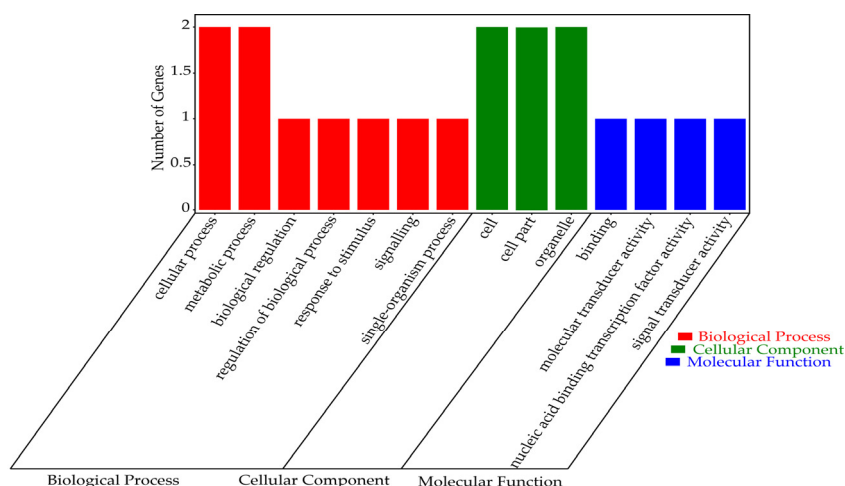

**Figure S5.** GO enrichment analysis of target genes regulated by DElncRNAs from the intersection between NDB-vs-EDB and NDB-vs-LDB via the cis-regulatory mechanism. Note: EDB referred to the wagging dancers after foraging on a feeder with 1.5 M sucrose solution in the first phase. NDB referred to the non-dancing bees after foraging on another feeder with 0.5 M sucrose solution replacing the feeder with 1.5 M sucrose solution in the second phase. LDB referred to the wagging dancers after foraging on the feeder with 1.5 M sucrose solution replacing the feeder with 0.5 M sucrose solution in the third phase.

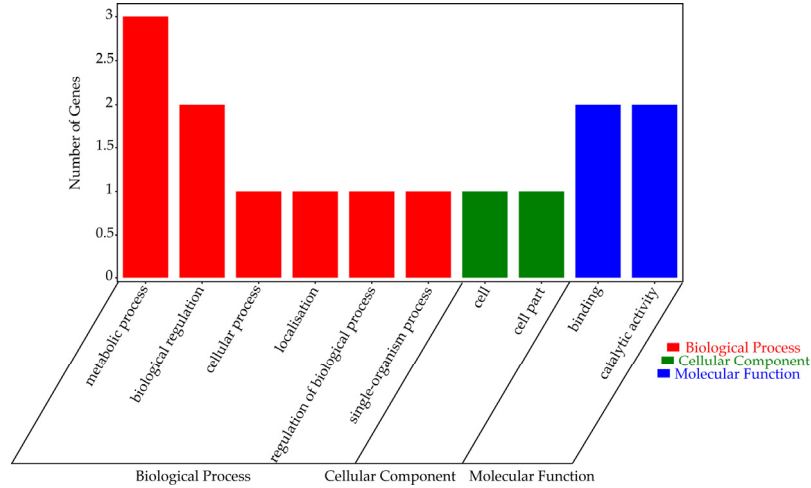

**Figure S6.** GO enrichment analysis of target genes regulated by DElncRNAs from the intersection between QB-vs-EDB and QB-vs-LDB via the cis-regulatory mechanism. Note: EDB referred to the wagging dancers after foraging on a feeder with 1.5 M sucrose solution in the first phase. LDB referred to the wagging dancers after foraging on the feeder with 1.5 M sucrose solution replacing the feeder with 0.5 M sucrose solution in the third phase. QB referred to quiescent bees on the comb after removing the feeder for 1 hour in the fourth phase.

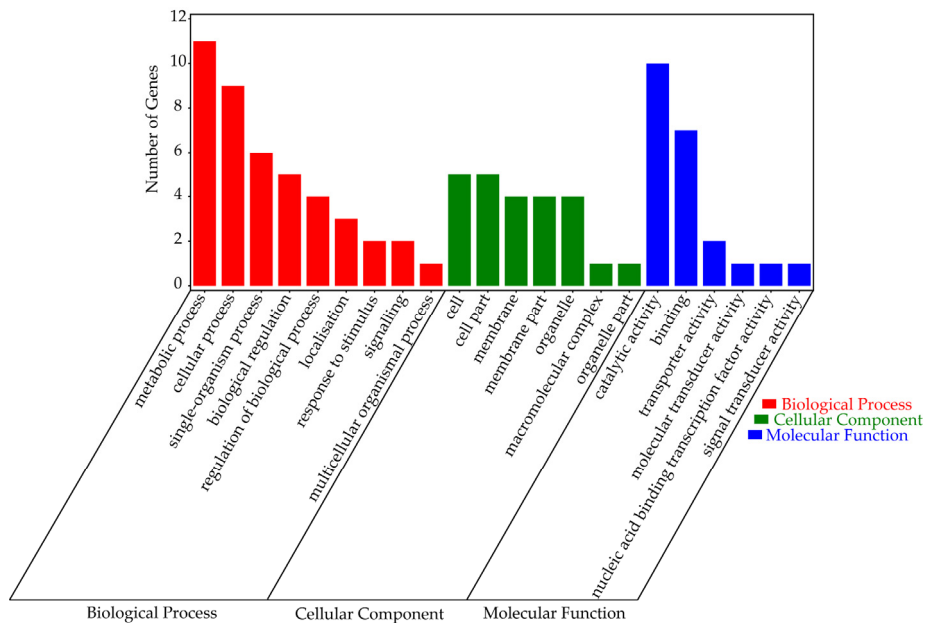

**Figure S7.** GO enrichment analysis of target genes regulated by DElncRNAs in QB-vs-NDB via the cis-regulatory mechanism. Note: NDB referred to the non-dancing bees after foraging on another feeder with 0.5 M sucrose solution replacing the feeder with 1.5 M sucrose solution in the second phase. QB referred to quiescent bees on the comb after removing the feeder for 1 hour in the fourth phase.

**Table S1.** The specific primers for qPCR.

| Primers          | Sequences (5'→3')         |
|------------------|---------------------------|
| MSTRG.3703.1-F   | GCAAGAATAAGAGCATTGGCGGAAG |
| MSTRG.3703.1-R   | TCAACGGCAGGAAGCGAGTCT     |
| XR_003305349.1-F | CCAGAGCATCATTACCTCCAGTTC  |
| XR_003305349.1-R | AACAGGGCGAAGAGAGCAACAAG   |
| XR_001702399.2-F | ACTGGAGTTGGAGGCGTCTGAAT   |
| XR_001702399.2-R | CAGCAAGCACCGCTAGACCTTC    |
| XR_003304525.1-F | ATATCGGCTCAAGGTGCAAGGTG   |
| XR_003304525.1-R | CGGATTCGCTCGTTCCTCTTCTC   |
| XR_003304191.1-F | TGTTGATGAGGAGCACTCGTTAGTT |
| XR_003304191.1-R | CGTGGATGAGGCACATTCGTAGAA  |
| MSTRG.8314.1-F   | TCTTACCCAGTGTTAGGCTCGCTAA |
| MSTRG.8314.1-R   | ACGTGATGCAAATGAACCAGAACCA |
| XR_001706524.2-F | AGACGAATGGATTGCGAAGTTGGA  |
| XR_001706524.2-R | CGACCTCTAACTACGAGTCTGCTCT |
| MSTRG.3555.3-F   | CAAGGCTGTATCTTGCTCGGTGATT |
| MSTRG.3555.3-R   | CCGTCCGTTCCAATGCCATCTC    |
| actin-F          | GAAATGGCAACTGCTGCATC      |
| actin-R          | TCCACATCTGTTGGAAGGTG      |

**Table S2.** Quality control and evaluation of RNA sequencing results.

| Sample | Raw Reads | Clean Reads(%)     | Q20(%) | Q30(%) | Mapped Reads(%)     | Unmapped Reads(%)   |
|--------|-----------|--------------------|--------|--------|---------------------|---------------------|
| EDB-1  | 106618148 | 106440372 (99.83%) | 98.59  | 95.78  | 20875902 ( 19.61% ) | 85564470 ( 80.39% ) |
| EDB-2  | 87365452  | 87221972 (99.84%)  | 98.61  | 95.81  | 16065688 ( 18.42% ) | 71156284 ( 81.58% ) |
| EDB-3  | 83544802  | 83396150 (99.82%)  | 98.50  | 95.60  | 16214902 ( 19.44% ) | 67181248 ( 80.56% ) |
| LDB-1  | 85998742  | 85888630 (99.87%)  | 97.02  | 91.33  | 13817784 ( 16.09% ) | 72070846 ( 83.91% ) |
| LDB-2  | 85111522  | 85006610 (99.88%)  | 97.09  | 91.45  | 13131116 ( 15.45% ) | 71875494 ( 84.55% ) |
| LDB-3  | 81773108  | 81676726 (99.88%)  | 97.13  | 91.57  | 13845216 ( 16.95% ) | 67831510 ( 83.05% ) |
| NDB-1  | 90789674  | 90642128 (99.84%)  | 97.10  | 91.51  | 16532822 ( 18.24% ) | 74109306 ( 81.76% ) |
| NDB-2  | 79308232  | 79195420 (99.86%)  | 96.97  | 91.22  | 13109598 ( 16.55% ) | 66085822 ( 83.45% ) |
| NDB-3  | 79929110  | 79828088 (99.87%)  | 97.02  | 91.25  | 14234548 ( 17.83% ) | 65593540 ( 82.17% ) |
| QB-1   | 87062400  | 86956212 (99.88%)  | 97.05  | 91.39  | 14830104 ( 17.05% ) | 72126108 ( 82.95% ) |
| QB-2   | 83274924  | 83174990 (99.88%)  | 97.07  | 91.44  | 16591666 ( 19.95% ) | 66583324 ( 80.05% ) |
| QB-3   | 83322858  | 83219542 (99.88%)  | 96.96  | 91.21  | 14409218 ( 17.31% ) | 68810324 ( 82.69% ) |

Note: EDB referred to the wagging dancers after foraging on a feeder with 1.5 M sucrose solution in the first phase. NDB referred to the non-dancing bees after foraging on another feeder with 0.5 M sucrose solution replacing the feeder with 1.5 M sucrose solution in the second phase. LDB referred to the wagging dancers after foraging on the feeder with 1.5 M sucrose solution replacing the feeder with 0.5 M sucrose solution in the third phase. QB referred to quiescent bees on the comb after removing the feeder for 1 hour in the fourth phase.

**Table S3.** LncRNA sequencing results from four groups of honey bee brains.

| <b>sample</b> | <b>Reference<br/>lncRNAs</b> | <b>Sequenced<br/>Reference<br/>lncRNAs(%)</b> | <b>Novel<br/>lncRNAs</b> | <b>Sequenced Novel<br/>lncRNAs(%)</b> | <b>Total<br/>lncRNAs</b> | <b>Sequenced Total<br/>lncRNAs(%)</b> |
|---------------|------------------------------|-----------------------------------------------|--------------------------|---------------------------------------|--------------------------|---------------------------------------|
| <b>all</b>    | <b>3146</b>                  | <b>2445 (77.72%)</b>                          | <b>432</b>               | <b>432 (100.00%)</b>                  | <b>3578</b>              | <b>2877 (80.41%)</b>                  |
| EDB-1         | 3146                         | 1310 (41.64%)                                 | 432                      | 392 (90.74%)                          | 3578                     | 1702 (47.57%)                         |
| EDB-2         | 3146                         | 1268 (40.31%)                                 | 432                      | 395 (91.44%)                          | 3578                     | 1663 (46.48%)                         |
| EDB-3         | 3146                         | 1333 (42.37%)                                 | 432                      | 402 (93.06%)                          | 3578                     | 1735 (48.49%)                         |
| LDB-1         | 3146                         | 1369 (43.52%)                                 | 432                      | 402 (93.06%)                          | 3578                     | 1771 (49.50%)                         |
| LDB-2         | 3146                         | 1332 (42.34%)                                 | 432                      | 395 (91.44%)                          | 3578                     | 1727 (48.27%)                         |
| LDB-3         | 3146                         | 1344 (42.72%)                                 | 432                      | 402 (93.06%)                          | 3578                     | 1746 (48.80%)                         |
| NDB-1         | 3146                         | 1341 (42.63%)                                 | 432                      | 399 (92.36%)                          | 3578                     | 1740 (48.63%)                         |
| NDB-2         | 3146                         | 1253 (39.83%)                                 | 432                      | 399 (92.36%)                          | 3578                     | 1652 (46.17%)                         |
| NDB-3         | 3146                         | 1359 (43.20%)                                 | 432                      | 400 (92.59%)                          | 3578                     | 1759 (49.16%)                         |
| QB-1          | 3146                         | 1436 (45.65%)                                 | 432                      | 403 (93.29%)                          | 3578                     | 1839 (51.40%)                         |
| QB-2          | 3146                         | 1413 (44.91%)                                 | 432                      | 403 (93.29%)                          | 3578                     | 1816 (50.75%)                         |
| QB-3          | 3146                         | 1446 (45.96%)                                 | 432                      | 400 (92.59%)                          | 3578                     | 1846 (51.59%)                         |

Note: EDB referred to the wagging dancers after foraging on a feeder with 1.5 M sucrose solution in the first phase. NDB referred to the non-dancing bees after foraging on another feeder with 0.5 M sucrose solution replacing the feeder with 1.5 M sucrose solution in the second phase. LDB referred to the wagging dancers after foraging on the feeder with 1.5 M sucrose solution replacing the feeder with 0.5 M sucrose solution in the third phase. QB referred to quiescent bees on the comb after removing the feeder for 1 hour in the fourth phase.

**Table S4.** The sequence information of 432 novel lncRNAs found in the study

1. >MSTRG.3.1 Gene=MSTRG.3

CTACAAAATGTCAATATCAAATTGCTAATTCAAAAATTTATATTATGTATATTAGAAAAATGA  
ATATTTATTATTCGATATAAAGAAATTAATAAAAAGATTGATCCAATTAATACATGTAAAC  
CATGAAATCCTGTTGCTATAAAAAAAATTGAACCATAAATACTATCATTAAAAACAAAAA  
ATGAATTTGAGTATTCAATTGTTTGAAGAATTGTAAAATAAATTCCTAATAGAATTGTTAAT  
AATAAATATGATTTTCTAAGTTTTAAATTATTAATAATTAAATAATAATGACTTAATGTAAC  
TGTAATCCTGATGATACAAGAATAAATGAATTTAGTAAAGGAATTTCTATTGGATTAAAA  
AATTTAATATTTTTTGGTGGTCATGTTATATTAATTTCAATATTTGGAGAAATTGATGAATGA  
AAAAATGTTCAAAAAAATGAAATAAAAAATATTAATTCTGATAAAATAAATAAAATTATT  
CTAAATTTTAAAAAATTAGTAATAAATATTGAATGTATACCTTGAAATGTTCTTTCTCGAAT  
AATATCTCGAAATCATAATATTATAATTAAAATTGAATTAATAAAAATTTAAAATTATAAATA  
TTGAGATTGATCTATAAATTCAAATAACTGTTCTAATGAGAGTATTTATAAATCTAAATGAT  
AAAATAATTGGTCAAGGTCTATTTGTAAGTATATGAAATGGGAAATTTTTTTTCATTTAGTTT  
TATTTTAAATATTTTAATTTGATTCAGAGAAATATAAAATTTAAAAGAATTGAAAATACATAA  
CTTTGAATTATTGATATAAAAATTTCTAAAGTTAAAAGTATATTTTGAATTATTAAATTAATT  
GGTAAAATTGAAATAAAGTTTCTAATAAAAAATTCCTAATAATGTTAAAATTAAATGTCCAG  
AAATTAATTTGCTGATAATCGAATTGATAATGTTCAAGGTCGAATAATTAATCTAATAAGT  
TCAATAATTACTATAAAGTTTATTAATAAATACTGGTGAATTTAATGGAAGTAAATGACTAA  
GGAATATAATATAATTATTATAAATTAAATAAATTAGAAATCTAAATCATAATGTTAATGAT  
AAAATTATATTTAAAAGTAGATGCTTGTTAATGTAAAAACATAAGGAATTAATCTAAAAA  
TGTTAGTAATTATAATATAAAGTATTAATCTAATAAAAAATAATAATATTAGATTGATATTTA  
GATTTGTTTATTTACTCAATTTAAAAAATATTGAAATGAAGTTGATTCAATTATAATTGGTAT  
AAATCTATGATTTATACCACAAATTTCTGAACATTGACCAAAAAAATTCCTGGACGTTTTTC  
TAATTAATTTAATTGATTAATTCGTCCTGGAAGTGCATCAACTTTAATACCTAAGGATGGA  
ACTGTTCAATGAATGAATTACATCTGTTGATGTTGTAATTAAACGTAGTGGGATTTTTATTGGA  
ATTACTATTGATTATCAGTTTCTAGTAAACGAAATTGGTTTAAATTATTATAATTTAGTATA  
TATGAATCAAATTCATATTATTAAATTTCTGGATATTCATATGATCAATATCATTGATGACC  
AATTGATTTAATTGAAAAAAAAGGATTACAATTTCAATTAATTAATAAAAATTTTAAATG  
ATGGAACAAATAATTAATAGAATAATAATTGGAATAATTGTTCAAATAATTTCAATATT  
ATGATTTTTTAATAAAAAATAAATTTGAGAATTTGTTTATAAATAAATCTAAAATAATATATA  
CAGTTAATGTTGAAATTATAATAATAATTATTATAACTATATTATGAAATGAAATTAAATTA  
TCAGCATAATATGAATTTGATTCTTGAAATATAAATATAAATCATGTGGAAATTTTAATAAA  
TTAAATTTTAATAAATATATTCTGTTATATTTTGTTTTATTTTATATTAATTTATTAATTTAAT  
AAAAAGATTAAATCTTTAAGATTGAATTTAAAATTCAATATAAAAAATAAAATTAATTATTT  
ATTTTATTAATAAATTGTTATTAATTTATTTTTAAATTAATATGAATTAAGTGGGAAATTTTA  
ATAAAAGTTTAAAAATACTTTATATTTGAATCTTAAGTTCAATGCACTTATTCTGCCATATTA  
AAATTTAATTAATAAATTGATTTTAAATTTAAATTTTAAATTAATAATGGAATTTCTAAATGTGA  
ATGATCTAGAGGTGGTAAAAAATTTAATCATTCAAGTGATGATTGGTTGAATTTAAATAATA  
ATATTCGTTTAGAAATTAATCTTTCTAAAATAATAAAAAATTAAAAAAATTATTCTATTTAAT  
GAAATTATTGATCCTATAGATGAAATTGAATTTCAACAGTAATAAGAATCTGGATAGTCTG  
AATAACGTCGTGGTATAGATATTAGTCCTAAAAAATGTTGAGGAAAGAAAGTTAGATTTAC

TCCAATAAATATTATAATAAATTGAATTTTTAATCATTTAATATTTAATAATAATCCAGTAAT  
TAATGGATATCAATGAATAAATCTTGAAATAATTGCAAATACTGCACCTATTGAAAGAACA  
TAATGAAAATGTCCAACAACGTAATATGTATCATGAAGAATAATATCAATAGAAGAATTG  
ATAATATAATTCCTGTTAATCCACCAATAGTAAATAGTATAATAAAACCTAGTGATCATAA  
AATTGAAATATTTAATTTTAATTTTGAACCATGATAAGTTGCTAATCATCTAAAAACTTTAA  
TTCCTGTTGGTAC

AGCAATGATTATTGTTGCTGAAGTAAAATATGCTCGAGTATCAACATCTAATCCGACTGTA  
AATATGTGATGTGCTCAAACAATAAAACCTAGAAATCCAATTCCTAATATTGCATAAATTA  
TTCTTAAATTACCAAAAATTTCTTTTTTCTCTTTTCATTTATTACAATATGAGAGATTAATCC  
AAATCCAGGTAAAATTAATAATAAACTTCTGGATGACCAAAAAATCAAAATAAATGTTG  
ATAAAGAATTGGATCTCCACCTCCTATAGGATCGAAAAATGATGTATTAATAAATTTTCGATCA  
AATAATAGTATAGTAATTGCTCCAGCTAATACAGGTAATGATATAATTAATAAATTTGCTGT  
AATAAAAACTGATCATGGAAATAATGAAATTTGGTCATAATTTATAGAAAAATTTTTTATTA  
TTATAATTGTAACCTATTAAGTTTAATGATCCTATAATTGAGGAAATTCCTGATATATGAAGA  
GAAAAAATTGCAAAATCTACTGAAGGTGAAGAATGATATAAATATGCTGATAATGGTGGA  
TATACTGTTTCATCCAGTTCCTGGTCTTGGATAAAATAAATTTCTTAATAAAAGTATAAATAA  
TGAGGGAGGAAGTAATCAAAATCTAATATTATTTATTCGGGGGAATGCTATATCAGGTGAT  
CCTAGTATTAAAGGAATAAGCCAATTTCCAAATCCTCCAATTAAAAATGGTATAACTATAA  
AAAAAATTATTAGGAATGCATGACTAGTAACAATTGTATTATAAATTTGATCATTGCTAATT  
CATGATCCTGGGGATCTTAATTCTATTCTGAATAATAAGTCTCATTGATGATCCTAGTATTC  
AGATCATAAAGCTAGAATAATATACAAGATCCCAATATTTTTATGATTGGTTGATATGAATC  
ACTTTATTATTAAGATTTAAAAAATTAATTTTTATTTTAATTTTGAAGATTAATAGTTTTTAA  
ATTTTAACCTAAATCTTTGTATATATTTTAAAAATTTAAAAAAATAAAAAAATAAAAAAG  
GGTTTTTAAAT

2. >MSTRG.31.17 Gene=MSTRG.31

TACAACATGGCGGGTGAGTGAGTGCCTGTGGATCGAACGAAGCTGCCCCAAAACACGAGG  
GATTTTCAGCTAACCCGTGGTGTTTGTGGGTTTCAGATATATCCTACATCCAGAAAGAAGAA  
CTGGACGATTCTGACGAAGTGACAACGGCTGGAACGACACGTGGATACGCGAAGAAATCT  
TGGGGTTACTTTGTGCGATTAAAAAGCAATGGAGATTGATGAAGTCGACGACGATGATGTT  
GATTATAATCTGAGTCCCGACGCTTCCGGAAACGATATTTGCAATATTGGAGCAAGTGGCG  
ACGAAGGTGGAAAGGACGAACCTGCTACTGAAATTGCAACAGTACGTAACCTCGGACGCAA  
ACTTCACACGGTAAGTCGAATCGAGCTACTATCCATCCACTGTTGCGAGCGATCGTTTCCGG  
TAAGTGTGTTCCCTTACCGATCATCATTCGCCTCGTTTCGATCCGAACGCGTTTTTT

3. >MSTRG.52.2 Gene=MSTRG.52

TCTGGATGTTCCGCGCGCAATGTAGTAAAAGGTCGTTTCAGCAAGTCGTCAATTTAAATTCAT  
TTGTTGTAACACGTGTCAGTGAATAGTTGTATACTTATTGAGTATTGTCATTATTTATGTAAA  
TATTTTTAACTAATATTTTAATAATAAAAAATGTTACGAGAATCAGTTGAAGAAATAGCC  
GGAAAGCCTGTTTGTACTTTTCATTTTTTGGGTTTCTATGCGCACGCGGTTCACTTCGCTGA  
ATATAACGGTCGATTCAGCATTGAATATCATATTCTTATCAATTTTATAACGTGTTTTTATAT  
AAATTTTTAATTTAGAACTTCTTTGAATATATAATTAACATTTTTTTAAAAATTTGACTGTAT  
CATTTTATTTCTTTCTATTTTTTTTTTAAATTTTTTAGATGGCAAAAATCGTATCCACACTGAG



4. >MSTRG.99.1 Gene=MSTRG.99

5. >MSTRG.151.2 Gene=MSTRG.151

6. >MSTRG.152.3 Gene=MSTRG.152

9

CGTGCCGGAAGAACATGCCGCGAACCCTGCCAAAACATAGTCGTTCTGTGTATGTATCGT  
 GTGCCAAAGTCGGTGACATTTGTGTCTAGACGCAAGATCGCTGGAATTTCACTATACAAC  
 CTGGAAACCTGTAACACCGTGTGCTTACAACCTTAAACAGACAAGATTCCTTCTCCAGCT  
 GATCGCAAAAAAAATCGTGAAATCGTTTCCGCGAGTGTCTGTCTCGGTATCGCGAGCGATC  
 TCGTCACCGTATCAGTCGTTTTATTTCTTTTTCACTCCTCCCCCTTCGTGTCTCGGATGCG  
 TCGTAACGTTTACGATGGTATACGGAAATTAGATGAAGATTCGCGATTCCCGCCGGTTTTCA  
 CGGGAACATTAACCTTCGATTTTCGTGTTTTCCCGTCTGACCGTGTCTACGACGTTTGAAAA  
 TTCGTTTCGGTCTGTAATCTCGGGTTGAACGGGTGGAAAAATTACGCGTAACGATATTTTGG  
 AAGATAGTATCTCGTCCGTTTGAAGTCGACGAGATGATCGTTCAAGCGGATTCGTTGTGCG  
 TGTTACTAGTGATGTTGATCGGTGCTCTGTTGGTAAAGTCGGAACCTGGGCCACGACCGCG  
 ATCAACGCCGATCTTCACCAATCAGTTCGCAGTCCACGTGCCAGATGGACCGGACGCTGCC  
 GCGGAGATCGCTGCCAAGTACGGATTCGACAATTATGGACAGGTAACGTGAGTCGTTCCGT  
 TTCTCGTGATGAAGATATGTAAATAAATATGTACGTAAGTAAATAGTAAATTTGAGTTAAA  
 TTTATCTCGTTTTTGTATTATTACAAATCCCTCCCTTCGATCTTTACCCGGATAAAATTTTTT  
 TCCTTTCCACTTGTTCTTTGAACCTTGTTGATCGTAATATTTAATTGATATACCGAGTTCCTTTC  
 CCGATTCTAAAAAATTAAATTCGTTGTCCAAAATGAAAATTTGTCTCGCGTTTCGATTTTATC  
 CCACGGCTTGATTACTCGAATCATATCACCGTATAAATTTAATGACAGTCTTTGTGCGAGTGC  
 GGATCCCACCGCATTGTCACAATCACGTATGTTAATGAACTTGGTAAATGATAGAGGTAT  
 ACGTATAAACAAACGTACCGACAGAGCGGATGGAGTGGGGGGGAGAGGAG

7. >MSTRG.176.3 Gene=MSTRG.176

CAATGCTTAATCCGTTATAGATTATATAGGTCTTTTGCTTCCGGTAAACCATGGTAAGTGT  
 AGCGTAGTTTTAAATTTATTGATATTGCTCATAAAATCTATAGTATTATGAATTTATCATTTT  
 AAAAAAATTGTTTTTACATATTTTATAATTTAATTTATATTTATTTATTCTTGAAAATGCATA  
 AGAAATATAAAAAATTATTCAATATAATCTTGCATTTTTCATAGTTTTCAACCACATGGTATG  
 TATTTTAAATTATTATAAATATATTAATTAATAATTAATAAATTTATTTATAATTTATGATATA  
 ATTTTTCATTATTATAAAAAATAATTGTTTTTTTTTTGTTAAATAGCCATTTCAAAGGTTTGTAG  
 AATCTGGTCGTATTGCTTATGTGAGCGATGGGCCGCACAAAGGTAACTTGTTGCCATTGTA  
 GACATCATTGATCAAAATCGGGTTTTAGTTGATGGACCTTCTTCAAATGTTCCACGTTGTGA  
 AATGAGATTAAATGATCTTCATTTAACTAAATTCCGTATACGTTTCCCATATACTGGATCCA  
 CCCGTGTTGTACGTAAAGCATGGGAAGCTGCAAATATTAATGACCTTTGGAAACAACTAT  
 GTGGGCAAGAAAGGTTGAAGCTAAGAAAAAACGGCTGGAACCTTAGTGATTTTGATCGTTTT  
 AAATTAAGAAAAGCAAGACAAATAAGAAACAAATTAAGGACAGATGCATTTTACAGATTA  
 AAAAAGAAAGCTAAGAAAACAAAGGCTACAGGTACCAGTAAAAAAGTTGAAAAGAAGTG  
 ATTTTTTATTCTATGAAATAA

8. >MSTRG.231.1 Gene=MSTRG.231

GCACATCCTTCGTTTTTTTCTTTGTTCTTTTCTCTCATAAAAAAACCTGTTTTTTTTTCTATAA  
 CGAACTTTTCTCAACGATCTCTTAGTCCTTCTGTGCGCGTCTTCGGGGTCTTTAAGCGTGTG  
 CCATTGAGCGATAGGACGTCTCGGGGATGCCAACATATCGGACCAGTGTCTCAACTCTGTT  
 CCACTCGCGTTGTACCCCAAGACGACCTTCCCAATGGGTTCTGATGTGCCGATACGATCGTA  
 ATCGACTACCGTGACAACCAATTGCACTTTCTGTATCTGTTTGAAGGGTACCTCAAACGTGA  
 ATGATTTCGTTGTAATACGGATTAAGAGTGCATTTTTTGTATAGACGTTTTCTTCTTCAACC

TTTTGCCATTTTGCATCAGGGCGATTTTTACGTAAGGATCTGATAAACCACCGACGTCCATT  
 TTCTTCAGATTTTTCGCTTCCAAGATGACCACGGTTAATTTACCAGCAGTCGGTACGTATCG  
 AAGCGAGAAGCAAATGTCACCCAATTTGTTATCCTGACCACCTTCACCCTCGACGCTTTGC  
 AATTCTCTCCATTCTCGATCGTCTGAGCCAGATCGACTTGGCATAACGGAACCTTGACTTC  
 ACCGATCTGATCGTGTGTTGGAGAACCTATCGAAGTCGAAGATGGCGAAAACGAGAGTTTTG  
 TTCATCGCATCCGCATAAGGTACGCTCTTGAATGTGAAAGTCTCGTTGAACACTGGGCTAA  
 GCGTTTTCTGTGACCTTTGTTTCGAATTTTTTCTTCTGTCTGGTAATAGATAAACCTTCAC  
 GTACGGATCTGAAGTACCACCCATGTCCAAAGCTGGCAATTCCTCGGCTTGTATTACCGTTA  
 CTGCTAAACTGTTTGTGTTGAAATCGTATTCGAGCTTGTATTGAAGTTTCCCAAGTTTCACCT  
 CGCTCTGCTTACTTTCAGCTTCATCCGGTTCTTCGGCATTGTCGGTAAGCTCTTCCATATCCG  
 GCTGGACCTTGTCTTGTACGTGCTGCCCAATAGTTGAACAGATTTCAAGTCCACCGCCCC  
 TTCAATCCTTTCTTCCCATCTTTGGATCGCCTTTTGGCAGAGCATCTTCTGATGCAGCAGAAG  
 CAGATTCCGAGAACTACTACGCTTACAGCTATTAAAATCGCAACAAGTCCCCATGTTGGTA  
 TCCCCATTTCTTCCGCGATTTCTTTGCCAAGATTTTCCATTTGAGTTTCAAATTTTTCCAGC  
 ATTTTCAGTCACTACCTCTGCCTCTGTGGCTTCTTTTATTTCCATCTCGGTGCTCAAAAATGTT  
 TTCAACGTCGATTCAACGACCTCCTCCGGTTGTGGCTCTTCCGGCACCTTCTCAGCTTCTCTC  
 TTGTTAATGGCAGGCATTTTGATGCTCGTTCCTCGGTGGCTCCTGACTACTTCGAAACGAGG  
 TGTCTCGAGATTCTCTATCCTCTGTCTCTGTCTTCGTTTCGAAGATTTGACGCGG  
 GCCGGATCCGTGGAAACAATTAGCGAACGTGTTCTGGCGTTGTATGGCAATGAGAAAAGA  
 GCGAGTGGAAAACACGGGGTCTCGCGTTTTACAAGCGCATCATCGTTTTATACGCCCTGCG  
 ACATCGACGACGTTGTAGACGGTGGAAAATCTATCGGTGGCACGGTCTCTCGACGTTGGGA  
 CACGAGTGCGCCTGACC

9. >MSTRG.255.2 Gene=MSTRG.255

TCTAGTTTATTAATGAGTATCACTGATTTCCGCCATTCTCTCTTGCCCCCTACCAGGCGTCGCG  
 AACATATCGTCTTATTATGATTGTAATTCCTGTATTCTTGTCTTAGTTTGAATTGAGTGTGTT  
 TGCTATCTTATTGTAGAAATTTGCAACGACTGTCAGTTTCCTAACCTCTTTGCCGACGAATGT  
 TCCGGTGTTTCATATTGTGTTCAAGTTAATAGTAACATATAATCACATAACATGATGTCGCGG  
 TCTGTGCGTGCAGAGACTCGTAGTCGTGCCAAGGATGATATTAAGCGTGTAATGCAAGTCG  
 TTGACAAAGTTCGCCATTGGGAAAAGAAATGGGTTACAATCGGAGAACTACTATGAAGA  
 TTTATAAATGGGTACCTATATCGACACTTGATCAGAAGAAGAAAGGAAAAACAGTTGCAG  
 ACAAAGAAAATGGTTTGCCAAGAAAAAGTGGATTAGATTCTTCAAATTCCAACCTTTGGTCT  
 TACAGAGGATTCAAATACATGTTTTTCAACTGTTAGTGATTCTCAAGGATTAACAGACTTTT  
 CTGCACATCTGGGATTTTCAGAAGATTCCAATTCACAAAATAGTGAACCAACACCTAAAAG  
 TATCAATATCCATGGGCGCCCCGTTACCGCCCATATCTGTACGCACCCAACCAGGATGAAA  
 ACATGCGACGAGGA

10. >MSTRG.276.1 Gene=MSTRG.276

AAGCGTAGTAGCAAGTAATGATAGTTTCGACGAAGAATAGTTTTTTTCGTTTGTCTAGAA  
 ATCGACAACAATCGACGAAGAGAATCAACTATGATCGCTTGTTTTACAATAATCCTGAGTG  
 TAAAAATTTATCTGAAAACAAGTTATTTCTCAGCTTCTGTATACTCATGATTAAAAATCATC  
 GTTAAAATTCATTTTCGATCGTTAAAATATAATTTTAAAAAACACGTATAAACATATAAATTT  
 TCAATAGCAATAGATTAAAATTGAATCCATCCGATTTTTAAATTTAAATTCTTCCCTGTCAA

11. >MSTRG.280.1 Gene=MSTRG.280

12. >MSTRG.302.1 Gene=MSTRG.302

12

GATGATCTTGGTGGTAGAGGTAGTGTTTCGCTCCTTCAGGAATCTTGTTCCAATTCACAACAC  
 CTTGCTCGGGAATACGTGACAAAATGCCAGCCATCTGCTCCCTCACTTTCTTCATGTGAGCT  
 GAAATTGCACTTTGTAACGTCTGGTACCAGCCATCCAAAAAGTTAGGTCTGAGCAGCGTGT  
 TCCAGTTCCAGTTGGAGCCTTCGTGCTGTCTCGAAGCTCAAACCTCGGGAAATCGAAAGTT  
 GCAGCCATCATTTGATCTCTTTCAATGGACGGTAGGACGAGAACAGTGTCCACATTCTTCCT  
 TTCCTCCTTGCTATCCTCATCGTGTGCACCAGGGAACTGTGCGTGCATGCGATGAACCACG  
 CTGCAATGAATAGAACGCCAAGGGTCTTCATTTTTCTTGCACCAGAAAGTCGCTCCGGTAA  
 CTTTCTACGACGATGATTGATTAGTACTGACGGGTTCGGCTTCTTGCGAACGGGACTGTCA  
 CAGAACTCGCGAGAGGATCAAGGTCACTCACAGAACCAGCTCACTGAAACTCCCTGACGC  
 TTTGCACCACGACTTTTGTCTCGCGCCACTCTATATGTGATCGTTGCGCTACTGCTCAACCAA  
 TCGTCACGCTTCTTGTCGGGATCACGTGAACAGTCAGTCACGTGATCGTAGGGCGCGCTGCT  
 TGA CTCATAATATATCTTTTCCCGGTATT

13. >MSTRG.315.1 Gene=MSTRG.315

GTCCAGGATACCGGGCTCCTCGGTTAAGGATCTCGTGGTAAGCCTCTTACGCCTTCTCTTGT  
 GCATTGTCAGGAATCGACCGGTTCGGCCTCGGTCTCGAGCGGCCGATATCCAAACTCTCGAG  
 AAGGATACGATCGACCTGTGACAAACGTCTGTACGCGGGTTCCGTCCTTGGTTCGTGCGGG  
 ACTTCCGCCAACGTGGCCGACACGCCGGATGTTGGCAGCGCGGCGCTCTCGGAAATGCGG  
 ATGAACACATTCTCCTCCCCACTGTCCACCGTTATCTCCGCACTTCTTCTCTCCTGCGTCTCG  
 ACAGCCTCTTTAACGTGTTCCGCTATCTCGGCAGCCTTGAGCCCCGTCTCGATGGGCGCTAG  
 TTGCGAGTGGCGGCTCGTCCGGGCGTCCGGGGTGATCTCCTGGTAGCAAGACTCGCCCCGAG  
 CCGCGTCTGCTGCCCCGCGATGCACATGGCGCGCCTGAACAGCCCCGCGACCACGGCGCAC  
 AGGCCGCACTGCATGCCGCCGCTGCCTCGGCTCGACAGCGAGCCGCCATTGGTCCGTCGAC  
 GGGTCCGAGTCCCGCGCGAGCTGCCCTCGCGCGATCCCGACGCCAGCTTTCCTC

14. >MSTRG.345.2 Gene=MSTRG.345

ATTCGGTTTATTTTCGAACACTAACCCGGTATTCCACCGTGTGCAAGTGCTGACGTTGAAAA  
 AATAAATTTAGGAGAAATTAATTTTGATTAAAAATTTTTAATGCATAATTTAATTAATAAAT  
 TTATTAAGTTTTGACATTTTATTTATTGATTATAAAATATAATAATGCATACTGCTTTTATGCG  
 CGGTAATGCTATTTTAGCATATACTTTGAGTGTTTCGGCATGTTTAACATTTTGTGTTTTCTC  
 TCTACTGTATTTATTGATTACAGAGCAAACGCAACTTTAAATACTGTAAAAGTAGTTGTAAA  
 AAATGTAGCAGATTATAGTGCTTCAAGAGAGAAAAATGATTTGGGATATTTAACATTTGAT  
 TTACAAACTGATCTCACTCCTTTATTTAATTGGAATGTTAAGCAGTTATTTTATATCTCACA  
 GCAGAATATCAAACAGAAAATAACAATTTTAATCAGGTAGTATTATGGGATAAAATAGTA  
 CTTCTGGGAGATAATGCTGTTCTTGACTTTAAAAATATGAACACAAAATATTATTTCTGGGA  
 TGATGGTAATGGTTTAAGGGGAAATAAAAAATGTAACGTTAATATTATCATGGAATATTATA  
 CCAAATGCTGGACTTTTGCCAAGTGTTAATGCATTTGGTTCCTACTTTTGCCTTTCCATCT  
 GAAT

15. >MSTRG.365.1 Gene=MSTRG.365

GTTGCTTCGCCGATTGCTTGTTTACGAGATTTTATCAAGATTTTGCGTGAGTAGAAGTTACTT  
 TGGTGTCAGTGAGATTCTTCGATACGAAATCAAGGATGTTTCCTTTTCGAAAGGTTGATAGT  
 TCAGGTTAGAAGTTTATTCTCAACAATCGATCAATCTTAAACAGAACCTCTTTCGATGTCC

ACCTTTACCTAACCTCAACAACGAAAGAAAAAAGATCAGTTTCATCTCTCGAACGACTCGA  
TCAATCGTGAGGACGATCAATTTCAAGTATTCACCAATCGAAATCAATCGAAAGGTACCCA  
AACGAAACATAACCTCTTACGTAAGCTCCCTGTTCCCCCTCCACTATCCGTTCCACGGTGAA  
GCGCGATACCAGTCCGATAATTCCATCCGATTAAGATGCACCTTGTCGAGACGTGCTCGCG  
CAATTCACGTAATTCGCGCAATTAACCCCTTAGAGCCGCATTCCCGCCCGTTCCTCGGCATC  
CGGCCCCCTCGTTCGTTTCATCGAGGTTTCGCTGTGAAAACGGGTTCATTTCATGAACCACGGC  
TGTGGTTTCGGCAAAAAGCTCCATCTTCCCTCTTTTCCCCGCTCATCCTCCTCACAGTCCCACC  
TCTTGTTTCGTCGCTTTGCTCGTCTCGTCGGGCCGAGAGAGAGAGAAAGAGAGAAGGTGCACGT  
AGAAAACCTGGTATCGGTACAATGCCATCGGAATACGCTATCTCAGCCGCTATTTTCAGCTCG  
AGAGGAGCGGGTAGAGCAAGAAACAGACGCCACCGGAAATCATCATTCTAACCGGGTAC  
GTTTAATCGAAGGGAAAACCGGAATACGCCGCGGGCTGACTGACAACAGGATCAACCTGC  
TCTGTGGACGTATCGAAGCCAGGATTCCATTCCGGCTCGATTTTTCAACACCGACACGGCG  
ACCGCAAGTATCCCCACTCGTCTCCACGACCGACTCTTTTCTTCTCGATCGCTGATTAATTAC  
ACGTATTGTTAGACGAGCGTTCTTCTTCTTCGATCGTGTAATGTGGCGCCGTTCTAGTCGA  
GTGGGAATGGGAAACGTGCGAAACGTTGGTAATACTGGTCTACATTTCGCGCTGCGAACGTC  
AGAGTGCACCGCAAAGTCCATATCCCTAAGTTTCGAGGATACGACACGAGGATATCGTGGT  
CGGCACGTACACCAGCTGGTCCAACCTTCTGTCCAGCGTCGACAGCTGCAACGAAAACGAA  
AAATCGGAATTGGAATCAGTGAGAGCAAAAACCTGACTTCTGGAGGGGATATGTCTGTG  
GATCATTTCGTGGCTCGAAGAGGAAGAGTGCAAGAGAGAAAGAGAGAGAGAAA

16. >MSTRG.407.1 Gene=MSTRG.407

CCTCCGTGGTTACCGTTATTACCGACAATGGTTCAGGGGACATGCTGCCCAATCCTTCGTCA  
CCGCTCTCGCTAACGTGCATCGGTAGGCTAACAACGACGCCTCCTTGATTATCTGGTTTGCG  
TTTCTTGATCGGAACATCGCCACCCCTCGTGCTGATTCACCAACCGTTTCAATTGACAATTCT  
GTGACAACAGTTGGGTCTTCTCTTGTTCAGCTGGTATATATATTCGGCAGTCTGCTGAAGT  
ATCGCAGCCTTAGAAAGTTTCTCGCCCTCGTGGTGCGGCAGCAACGTCCTCAGCGATTGGA  
AACCGGCGTTAATACTCTGCATCCGACGTCGTTTCATTGCTGTTGGCGATTTCTCGCCGCATA  
CGCTTCTCCTGCTCCATGTGGCTTCGCGGTGTCACACGGCCGACGTTGCTGGTACTATTTCCG  
TTGCTCAACGCAACGTTTTGACCAGCAACACGGCGAGATACTGCGCCGTTGCTCTTCGATTG  
CTGTTGCTGTTGCTCTTGCGAATCAACGACCTCGGCGATCGTCACGCTCGTGGCCACCGAGC  
CCTCCTCCACTGTTCCGATGCTTCCGCACAAATTAGTTTCTTGTTCCCTCGGTGGTTTCAACAA  
TTTCTTCAAGTAGAATTCGATCCTCACTACCAAACTGACATATCTCGTTAGTCCGCAGCA  
CTGAGAATCCCGCCGCGCGATTCCACGTCCCAGCAACCGTCGTCGCGGCAGCGAAAAGAC  
GACGGGCTTTTCTCGCACACTCCACAAAAACGACGCGCACACCTCACGCCTATGACGCGGA  
TTCTCCGGAACCTCGTTAATTAATTTTTTAAACCACGGTGGCACGCACCGAGATTTCGTCCACG  
GAACAGCCACTCCGCGCGGCGCACACACAACGCCCGAACGCGTTTTGTAATGGCGATCTTT  
GGCGGGAAACAGCTGAGGGCCCCCACAGAGTACCACGAATCACTCCGCCACCGGCTTCAG  
GGCCGTCACCATTTATGGTCCATTTCAGTGCCCCTTTCTCCCTTTTATAAATATGCG

17. >MSTRG.409.1 Gene=MSTRG.409

CAGATAATTTTCCTTCGGTCGCCGAAATTTTCGACGTTTATACTTTTTTTTAAATATCTCGCTTA  
TTATTCAGAATATTAAAAAATGTTTCAAATAAAAAGTTGATTGGTTTCGAAAGGGCTATATTA  
TGACGCTCTCAGTTTTTTTAGTAGGTTGACCAATAAGGAGCTTTTTTAGCACAACTTTGTTTTT

TTTACTGATAACATGTATTTTTTAAAGCGCCAATCGATAGAGCATAAAAATTTGCTATAAAAA  
AATATTAACCCACTTATAGCGAAAGTCCTATGATTTAGAAGATATAGCAAAAATTTAAAAT  
TTTTATCACTATTTCAATCTAAAATTGAACATCCTAGCATAATATTAATTACAATAAACGC  
GA

18. >MSTRG.426.1 Gene=MSTRG.426

ACCGCGCCGGCGACACGACGGCTCCCCGCCGACCAATAGCTATTGATCAGCGGCTCTCTTG  
TGCCTGTGCGTGGCCGACGGCTTTGGAACACGTGCAACAGATCCTTGGACCGAGCAATTCG  
AAAGGGACATTCGAAGCCACAAGCTTGCCCCTTTAAAGTTGGTCACAATTTATTTTCGAGCT  
ACGTGGATACTACGCAGCATCCTGTTTCCGTCCACGATCCCTCGCTGTTTCGAGATTTTCCAA  
TGGATTGAACTTGACATGAAGATAATTGCACTTCATTTTGAGATGGTCCCGAACATCGGAT  
AGATCCAACCTATGATATTACCGTCAAGACATCGAAGACAAGATGATACGTTATACGGTCA  
ATCATAACATCCTCATGCAAGACATTTTATCCATTTTATTTTGTAAAACCTTTGTCTAGTATGT  
AGAGTACAATGAATCATACGCGCAGTAATTTCTTTTCATCCCAAAATTTTATCATTACTTG  
GATCTTTTGAATACAATTATGTCTAAAATTTTTTCTGTCTCATATTACAACAAGATATTCGA  
AAATTACGATAAAGATCTCTTATATTCCAGTGTAGTCGTCTATTTCCCGAAAAGAAATT  
AGAATAGCTACACAAGCGTTCGAGATTTGATCAATTAAATCAAATTACCCGTCACGCAAAA  
CACCT

19. >MSTRG.438.1 Gene=MSTRG.438

ATCGCTACCAAAATTCCCATTTCATATTTTTTACTAAATATCTTGTTTATTATTCGGAATATTA  
AAATATGTTTCAAATAAAAAGTTGATTGATTTGAAAGGGCTATATTATGACGCTCTCAGTTT  
TTTAGTAGGTTGACCAATAAGGAGCATTTTATGACAACTTTGTTTTTTTTTACCGATAACATG  
TATTTTTTAAAGCGCCAATCGATAGAGCATAAAAATTTCTATAAAAAAGTATTAACCCACTT  
ATAGCGAAAAACCAATAGTTTAAAAGATATAGCAAAAATTAATAATTTGTAGGAGGTTCGA  
CCTCCTGTCTATCATGTTCTCCTAATACAAAATCGAGTTTTTGGCCAAAAATTTTCCTTCGG  
TCGCCGAAATTTGACGTTTATACTTTTTTTTTAATATCTCGCTTATTATTCAGAATATTAATA  
AATGTTTCAAATAAAAAGTTGATTGGTTTCGAAAGGGCTATATTGTGACGCTCTCAGTTTTTTA  
GTAGGTTGACCAATAAGCAGTTTTTTTAGCACAACTTTGTTTTTTTACCGATAACATGTATTT  
TTTAAAGCGCCAATCGATAGAGCATAAAAATTTCTATAAAAAAGTATTAACCCACTTATAG  
CGAAAAACCAATAGTTTAAAAGATATAGCAAAAATTAATAATTTGTAGGAGGTTCGACCTC  
CTGTCTATATCATGTTCTCCTAATACAAAATCGAGTTTTTGGCCAAAAATTTTCCTTCGGTCG  
CGAAATTTGACGTTTATACTTTTTTTTTAATATCTCGCTTATTATTCAGAATATTAATAAAT  
GTTTCAAATAAAAAGTTGATTGGTTTCGAAAGGGCTATATTGTGACGCTCTCAGTTTTTTAGTA  
GGTTGACCAATAAGGAGCTTTTTTAGCACAACTTTGTTTTTTTTACCGATAACATGTATTTTT  
TAAAGCGCCAATCGATAGAGCATAAAAATTTCTATAAAAAAGTATTAACCCACTTATAGCG  
AAAAACCAATAGTTTAAAAGATATAGCAAAAATTAATAATTTGTAGGAGGTTCGACCTCCT  
GTCATACCATGTTCTCCTAATACAAAATCGAGTTTTTGGCCAAAAATTTTCCTTCGGTCGCC  
GAAATTTGACGTTTATACTTTTTTTTTAATATCTCGCTTATTATTCAGAATATTAATAAATGT  
TTCAAATAAAAAGTTGATTGGTTTCGAAAGGGCTATATTATGACGCTCTCAGTTTTTTAGTAG  
GTTGACCAATAAGGAGCTTTTTTAGCACAACTTTGTTTTTTTTACCGATAACATGTATTTTT  
AAAGCGCCATTCGATAGAGCATAAAAATTTCTATAAAAAAGTATTAACCCACTTATAGCGAA  
AAACCAATAGTTTAAAAGATATAGCAAAAATTAATAATTTGTAGGAGGTTCGACCTCCTGTC

ATATCATGTTCTCCTAATAACAAAATCGAGTTTTTTGGCCAAAAATTTTCCTTCGGTCGCCGAA  
ATTTTCGACGTTTATACTTTTTTTTTTAATATCTCGCTTATTATTCAGAATATTAAAAAATGTTTC  
AAATAAAAGTTGATTGGTTTC

20. >MSTRG.463.3 Gene=MSTRG.463

GTCCATGGACATAAATAGAATATGGATTGTGACGCTACTGTGCCACGACGACTATTGCCAC  
GATGGCCGAAGAGACTGACACAAACGATAAAACGACGATGGAAAGTATAGCGCAAAATA  
TACTCGAGGTTTCGTGTCAGCCGTGATCAGGACAGTGCCTGATAACGTAATAGTGCCTTTTCG  
AAGTGTGCGAAAGAAATCCTAGTACTAACAACACGTTATTATTCCGAACTTTTTCGATCATTT  
TGACAGGTCAGTACCGGAGGTGGGTCTGCATCGAACGAAGTAGCCGCATTAGAGTTTCAAG  
CTTCACAGGTAATATCGAGGCTCGAGGAAGCTGTAGAGAGGGCAGCCGACGGTGGCGGTA  
CCACATGGAACAATCCTTCCGGATTTCTTTTACAGCCAAAAACTTCTGATGAGATATTAAC  
TTAATTCAGGATTTGGTAATTCACGAGGATGCCCCACAATCTGTTAAAGATGGTTCAACAG  
AAACAACAAGTCAAGTAAGTAACTACTTTGCCAACATTAACCGAGCCAGCAAAATTAGCTTTAAT  
CGCACATACTATATCCGCGTATGCGCTTGCACTTCCAAAAATCCCATGCTCAGAGACTAGCTG  
GCCGATTGGCTGCAGATACAACACTAGATGGCTAAGTCATATTTTCCGTTTCGTTCGATTGTGCC  
TCTTCATTTACGAGGATCATTTGGAAGGTTTGGTCCGAGTGACCAGATTGGCTCTACATCG  
AAAATATCCTCGATATATGGAAGAAGGTTTTACTGCACTTGCAAGCCTCTCCACCTTTAATTT  
ACAGTTCTGTGGCTGCACCTTTAGGAGTTGTTCAACATTTGTGCAAACAACCTTTCCTTGCCA  
CTCCATTGTGTAAGGCCCATTTCCCATTAACACAATGTTTGGATCGCGATATAGCATGGATGT  
ATCAGCTTTAGAACGCAGACTTGCTGAAGATACACAATCAAATAATGTAACGCCACTTCTG  
GTATTAGCAGAAGGAGGCTCAGTTTTAACAGGAC

21. >MSTRG.474.3 Gene=MSTRG.474

CGGAAGTCCTAACGAGTAGCCGGCGAGCGAGCCGTATCGCGGAAAAACTTGTTCGCAATT  
AGATCGTGCCGAGATTTCCGTGTCCGTTCTTCGTGTAATCGGTTCCACGATCCGCGTCGCTTT  
CCTTTAATCCGTGTTCTCGTCTACATTATTCGTCTGACCTTTTTTTTTTTTTTCAAAAATCGGTC  
GATCCTCGATCCAAGTTTCGAAACTTGAGATTAAAAAGAAAGATTGTATGCAGTGAGTATC  
TGTAATCGTAGATGTGTCGTGAGCAGTGTTCCAGGCAGAGGCACGAGATAGGGGGGGAA  
GGAAGTCTCGATCTCGGGTGACATGTGACGAGTTGTGATCGTGCACGAGCGATAAAACGC  
CTCGTGAACAAATCTTCCGCGTTCGATTTATCCGCTGGATCCTCGACCGACCCATGAAAAC  
CGATGGGATGTATCAGTGAGGAACGAAAGTAGGTGTTTTCTTGATTCGGGGAATAATGT  
GCCTCGTAACATTATCACGATTCCAGTGTATTTATAGATACCAGTGAACACTCTCGAGGATAC  
CCGATATACATTCCGTGTGTCGTATCGTCGCGTCATCGTGGTCGGGGCTTAACGAGGCGCA  
GTTAACGTCCGTGCCCCGTCGTTAGGGTAAACGCGAGTGGGTCGCCCCGGTCTCGAAAT  
TGCCGCCACGATTGCCGGAACGATTGTTGGATGGTTGGATGGTGAGAAACGAAGTGGTGGT  
TCGCGGGATCGACGTAGCGGCCGCCGCTCTCGATCGCTCGCAGCAATTTCCGGCATTTTGG  
AATTTTGCAAGGGG

22. >MSTRG.510.2 Gene=MSTRG.510

TGATAATAAATATATTTAATAATAATTGGATATAATCGAAAATATATATAGTGAAACGAAG  
TAAAACTAAGATAAAACGAACGTAATGTCTCTATCTAAATATTACAAAAATTAAAAAATT  
CTATGCAGAAAAGACCATTACTCTTTAATTCAATAATGTACGGTCTTTTTTATACTGGTGCG



GAATTCACACAACAACTTATAATAGAATGTTTAAGTTTTTCGTTATCATCAACATCAATAAA  
CATAGAAGAAACAAATACATTTAAGATTGAAAAGTCGCTGTTTATTTGGATAAAAAATTTT  
AATCAAAGATTGGATTTATTAATAAGAATAACACGATGCAATTGGAAAGTTATAATTGGG  
CCCAACTAAAGCGATATGCTATTTATGGTTGTTTCATTGCAGGACCTCTACTACATGGATGG  
TACAAATGGTTGGATATGTTCTACAAAGGCAAACTATGAAAACCTATCCTCACAAAACCTT  
TAATCGATCAATTTGTTTTTACTCCACCATTAATTACACTATTTTTTATCAGTATGAGCCTACT  
GGAGAATAAACCAAATGTATTTGATGAATGTAAAGCAAAATTTTTTCAAACATTTAAGACA  
TCATGTATATACTGGTTACCAGTTCAATTTTTTAATTTTCTTTAATACCACCAGTATTACGC  
GTTTCTTTTGTTAGTATTGCAGCTTTTTGTTGGGTAAATATTCTTTGTTATTTAAAAAGTATTC  
CTGTATCTGAATGTAATGATAATCAAAT

23. >MSTRG.543.1 Gene=MSTRG.543

AATTCGTGATATTCGAGAAAACACGAAGTAGTAAGTAAGTACTGATTGCGCGGGTAGACGTTAG  
TGCGTAGGATTTGTAGAGTATAATACAAAGAAAAATGGCGATGGCAACAACCTCAAGTTAA  
AGGAAGCGGATGGCCGAGGAGAGCTAGTAACAGTTCGTTTGAAGGGAAAGTTGTACAGAA  
CCAGTCTAGTTAATGTTTTGACTGCCTCTCCTGTAGAACAACCTATGGCCGGTTAAGAGACGC  
TAGCAATTAATAATTATGTTCCCTAACACCTTTCAATGCATCTTACATGGTACAACCATGAGAC  
GGCTGTTTCATCTTTTCGTTAAGTACACATGGAAATTTTAAGCAATATTTTCATTGAAATCATT  
TTATTAATAATTATTATTGATTAATGATTTAATAATTTATTTTTGCTTATATTTATCGTGAAACA  
TAACCAATTATTTTAAAATGCCATGAAAATTTTCACGTAATAAAAATGTTTTCTATAAATTATT  
TTCTCACAATCCATAATATATATCTTCGTTGAATTAATAAATGAATTAATATATGATTTTT  
TGCTTAAAATTTCCAAAC

24. >MSTRG.553.1 Gene=MSTRG.553

TGTCGCGTTTACAATGAATAAGAAAAGCTCGTGTATAAGCGATTTTCGATGTTAGTCGTTAAT  
TGTAAGACCGCTATGCGCGTCGTTTATTTTAAAAACATTTATCCAGAATTATAAATATTATT  
GATTATTCAAGTTCAAGAATAGTTTTTAAGAACTATGTTTGGCTGAATAACTATCATTTCTTG  
GAAATTTTGAAGAAAAACGAATCGACACTCGCCACTTCTGACACTTCTCCACTTCGTTGTAC  
TATCACCACGGTGTAATGATTACAACGACAGACGATGTTTCGGAAAAAAGGATGCAAACT  
GTGGCCGGAAGTCGTGACGACTTGATGAAGTACTACGTCGCGTTTATACATATCCGACCCG  
CGAAGATTTAAATACACTTATAATGCAAGCAATTCAATAATATTATTTGTATCTATCTAAA  
TCTAAATTATCATGAAACATGAAATAATAAGTAATAAATAAATGAAAATTCACCTTTTTTTGT  
CAATTTATATTCTTAATTGTTATAAAACCTAACAAAAGTTATGATATATATAAATATAAATA  
AAGTAAACATTCAAAATATC

25. >MSTRG.557.1 Gene=MSTRG.557

CCCACCGTGCGACCCCTCAGCGGACAGACGGAGAGCTTGCCTCCGTTACGTGTAGGCGTA  
TGTAAGTGTGCAGGGCCGTGCCGTTATGAATTTGAACCTTCGAAATTTAAACGAGTCGGAGA  
AACTTGATCGCTTAGAGGCTTATGGTGTTACTATTGACGCTAATAATGAATCTACATAGTTT  
GCAATACCAGAGACATCTGGTGATCAAAGGAGGAAGCTCTTGATATTTTTTACTAATAGAA  
GGCAGACCAAGACCGCGTTTCCGCTGCAAGCAGCTATGTATATCGTATGAACCTTTGCCAA  
ACGGCGTTCGTTTAAACCCTTTTGTTCGTCAGAACTTCGTAAAGACAGCACTGTGATGTCCA  
AGTGAAACGATG

26. >MSTRG.581.4 Gene=MSTRG.581

CACTGTCCTGGAATATATTACTGACATTACTCAGCTTCTAGATGCGAAAGACAGTGAATAT  
GTATTCTTTTCGTATAAGATTTCGTATAAGCTTCCATATATCGAGTGAAGCTTAATTATAACTG  
TTAATCAAAAATCGTGAAATATATATACAGCATTGACATATCGGTCAAATAAATTCCAATTA  
AACATGATACCGCCAAAAGATGAACCGTTATGGTCTGATATCGCACTTCGTATGTTAATGA  
ATACCGTTTCACATCCCATTTGAATACGCTAAAGTTTTAATACAGGTAAAATATGCACAGTG  
GATAAAACCTGGATATTAAACCTTCATCGGAAGCTCATAATTTTTATTTATAACGCAACAGA  
TCGGATATGAACCGATTCCACCACGACCAACAACACTACTTTATTTGGACAACCGGCTTTAGCT  
CTACCTAACGTATTTCAATACGTTAGGTACATAAAAAATGTAGATGGATTTACTGGCTGTTA  
TCGTGGTCTTATTTCCAAAATTATGTGCCTATACTATGAGTGCAGTAGCTTTTGAAAAAACTT  
CTAAATCTATTAAATTTAAAGATGAACCAAGTAAAGAAATTTATGATTGTGATTTAGAAGA  
AAGTCAGAAACATAAAAAATATATATATGAATTCATAAGAGACCTGATTAGTAGAATGATT  
GGAATCATAGTTAGTCATCCATTAGATGTCATTGCATTAAGAATGATGGCACAATTTGTTGG  
TGGAGAAACAAAATACAATGGATTATTTAGATCATTTGTGGAAGTATATAAAGAGAATGGT  
ATCATGGGATATTATGCTGGATTATTGCCTCGCCTTATTGGAAATGCTGCTGTACTAATGCT  
AGTCAGTTCATCTACTTATGCTATTGATAAATACATTATAAGTGATCGCGAATTAAAACCAT  
ATGCTGTTTCCACCATAAGGTTTATAGCAACGACAATTACATACCCATTTTGTAGTAGTGCA  
CATTGTATGGCAATAAATAATTGTGGGTAAATTGCTGGTCTTCTCCACAAATGCCAATTTA  
CAATAGCTGGTTAGATTGCTGGTCTCACCTTTCAGCTACCAATCAGTTAAAAAGAGGAAAT  
AGCCTTTTATGGCGTTATTATACAGGACCACAAGTGATAATTAATGGAAAACCAATACCCA  
TTAATAAATACAATTTTCATTTACAAAG

27. >MSTRG.625.4 Gene=MSTRG.625

CGAACACATTATGATCGCATTTTCGAATTATTACTGTATTTTTTGGATCTTGTATTACTATTTTC  
TAACGAGAACGAATTATTTATGATATTTTCGATATATTTAAATTCTTCTAATACATTATTAAG  
GAAAATCGATTATTAAGGAACAAAACATGTCACAATTTAGTTGGTATAATACCGTGTA  
GTACTTCAAGTGTCTGATTGTATATAGCAGTTAGAGAATTCGAGAACGTACAAATTCTCAA  
AATCATATTTAATTACTGCGATTTGCGTTTATTAATAAACGTTGCAATTGTAATAATTTAAAA  
TTTAACTATTTAATAAAAACATTTTATAATAATGATTATACCTGTACGTTGTTTTACCTGTGGA  
AAAGTGATTGGTAACAAATGGGAAGCTTATCTTGGTTTATTACAAGCTGAATATACGGAAG  
GAGATGCTCTTGATGCATTGGGATTGAAACGATATTGTTGCCGCAGAATGCTTCTGGGACAT  
GTAGATTTAATTGAAAACTCTTGAATTATGCACCATTAGAAAAATAAAAAATGTAAAATTT  
TATATAATATTAAGATATTATTATTTATATAAAAAATATATTTTTTTAAATTATGTGAGAAAGA  
AAAGGAATAAATATACAAATATTATTGTAAAATGATTTGTATTTAAAAATCGTAATTATTTT  
TTTTTACCAGAAATATGTAAAAATTTTAAACAATGGTATAAAAAAATTGATTGATTTATAACA  
AGTTCAATAAAAGTTGCTTCAAAAACATGCTTTTTTTTAAATATACATTCATATTAAATGCAA  
CACAGAAGAGTGAAACATTTTCTGTATTGTGAATCACATGTATGAAATATATAATGATCTGC  
TTAGACGTAAATATTACAACATATATCATATAATAACCAATATAATGTATGTTACTAAA  
TTTGAAAAAATGAAGGTTATATT

28. >MSTRG.641.1 Gene=MSTRG.641

29. >MSTRG.652.1 Gene=MSTRG.652

19

TTGTTGCGGACCGGCGGCCACAAGTCTCTTCAAATGTTGCTTAAAATCGTCTTTCTTCACAC  
GGAATCAAGTTTCCACGTTGTGCTAAGTTGCTTGTGCTGCACGAAACCTCGAAATATTGCTT  
ACCTCGTAAAGTCGAGAATGTTTCGTGTGAGGGCGTTGTGTAAGACCCGGAGGACAATATGG  
CCGATCGAACTATGAATGTTCAAATGCTGCGCGTTGGTAGCTGCGCACTGGTACGCGTCAC  
TCGTCATGTTTACACCGGACGACTGTCGTTTTAGAGCTGCTAATTCTTGAGCTGATGTATTG  
GATCTTTTAATGGAAGGCACATAACTAAAAATTTATCAACATGTAAAAGAGCACGTACATT  
ATGTTCTTGTTGTACAACAAGTAAATTGAGCGTTGTTCTTGAGGTAATAAAAATTCCTGAAC  
TTGGTCGTAATCTGAACTTTCCAGGCGATGTTGTTTTTACCTAAATGATATAACAATTA  
ATTTAGATTATGTCTTATGTATACATATTTCTTAAATTTTCTTATAAAAATAAAGATACATCAT  
ACTTTATAAGATAAAGGTTTATCACTAGTCACATTTTAAAGTAAAATTGATCCACCAA

30. >MSTRG.670.4 Gene=MSTRG.670

TACCACGTAGGAGGCATAACACTCGCCGTCTCTACAATAGGATCCTAATATTTTCATAAATT  
TTTTGTTCTACGTTTCGGTGTTTTATTTTTTAACATTTTCCTCTTTTTATTATTCTTCAAGAA  
ATGTGTCATCTATATCTTCATAAATTGTTACACAAGATCAATCGTTAAGAAAATGGTATTTT  
GATAGACACATCGTGAAAGTGTTTGACCAACATTGTGATCGAACCGGAAAGACATTTTACA  
AAATGTTGCAATATCACGTATGAAATTAATCGCGAACAATATCTATACACTTATGTTCTTTA  
CTGTGGTGCCTAAATATTTTTTTAAAAGTAAAGAAAAACTAGTGCCTACATAACGCACGAT  
AAATGCGATATATATATACGATACGATATATATATATATATATATGTACATATATATATCGT  
AATTCGAAAATACAGATTGACTCGTGAACGTAATCGCTCAATGTTCCATTCTATTGAGTTC  
AGTGATATAATAATGTTTCTCGACGTATCAATAATATCAATAATTCTATCTCTTTAATATTTA  
AGTTTTATCAATTGTGTGAGAAAACTTTTCTTTCTGAAAATAAAAACTTTTAATCGCCGGAC

31. >MSTRG.678.2 Gene=MSTRG.678

GGTAGGATTCCGGGGGTTGAAAGCAGCTGAGAGCAGTGTACGAGTAGGTCATACCAGAGA  
AGAGAGGTAGTTCGCGTTTAACAAACGACTCGTTCGTTGAACAAAGCGTATAATTGTTGGA  
CCGCTTTTCTAAATTTTTCATTTCGTATCTTTTTTCAAGAATATCTCGTTTCCTAATATCGATC  
TCCATTTTTTTTTATTAGTGTTACTATCATCGTCATCGTTCGTTACTGTTTTATCGTTGTCATCG  
TTTTGTAATATTTCCATTCCATTTTTCGACGTTGCCGTTGTTGTTGTCGTTATTCTCATCGTT  
CTGTGTTGTACTTACTCCTTGACGTGTCCTTGTTATTATTGTCCTTGTCTTATTGCGGGGAA  
TATAATAGAAAATCGAGGAAAATGGATACTCCCATCGAAGAGCAATGGCTGAATATATTT  
ATCATATAAGGAAGAATCGACATTGATTTCGATCGATTGAAAACGGAACAATTTTTCTTCAC  
AGTATAAATTGTGCGGGAATTGATTTTCTCTTCAATCTTTTTTGTAAGGAAAAAGGA  
ATTAATGGTGAAGAGAAAAACGAAAGAATATGAAAACATAAGAAGAATATAACGAAAA  
ATATAAAAATAAAAGTGCCTCTAAACAGAAGTGGATTTCAAACG

32. >MSTRG.693.1 Gene=MSTRG.693

CTTATATAGAGAATCAGTCGTTTTGATCACTCGTATCCAATATGCAACGATATCAGCGCAA  
TATTTTTCGCGCATCAATCAGATCTAACGAAAAGAAATAAATTTGATCACTAGATGGCATA  
ATACGTTATGTTTCATCTTTTTTAATTTTAATCACAGATATAAGAGTCCTATAGGAGATACGAT  
CTATATATATATATATAAAAAATTCTTATATCTAGTCTGTAATAGGATTTCTATATCTAATCT  
GTGACTATAGATTGCTCAAACAAGATTTTACCTACAATCAATATAGTAATTTATCAGTGTT  
AAAATACAGATTCGACTATTACCGGTTGTACATAATATACATTATTGAAATCCTACATGAA

AAAAGGAATTGAACTTCTTCGTATTCAATTTCCGATGTTCTGATTTAAAGATCAACTATAAT  
 GTTAACAGTGTCAATTAATTTCAATTTAAACGTGTGTGATCAAGTTAATTAATAAATAAAGTGTA  
 AATAACAACAAAATTCTTTGAAATATTTTAAGAGAGTACGAATGTTTTATTTCGCTTTGATA  
 ACGCTACATTGCTTTGTCGTTTTTAACCTAAATCGAGATGGCTGATTCAGAACAAGATTTTCG  
 GAGATCGTGGAGATAATGACAATTTAAAACTGATAAATTATTTATCTTAAAGAAATGGAA  
 TGCTGTAGCTATGTGGAGTTGGGATGTGGAATGTGACACTTGTGCAATTTGTTCGAGTTCAAG  
 TAATGGATGCATGTCTTCGATGTCAAGCGGAGAGCAAAAAAGATGATAGCCGACAAGACT  
 GTGTCGTCGTCGTTGGGAGAATGCAATCATTCAATTTCAATTATTGTTGCATGTCACTTTGGGTGC  
 AACAGAATAATCGTTGTCCATTATGCCAGCAAGAATGGTCCATTCAACGAATGGGAAAATA  
 ACTAAATCAATCAAGCGAACTTCAATACTTATTTTGTTTTCTTTTTGTTTTCGTTTATTTTC  
 TGCTTATTTTTCTTTCTTTCAATTTCTTTCTCTCTCTCATATACACACATATGCACACG  
 CACATACACATACACTCTCTCATTCACTCACTAAGTTGATTAATTTACTCATTTTCAAATTTG  
 CATTTTTCATGTTTTTTCTTATTTTCTGCTTTCTTTATTTTTCTGCAGTTTTTAAATTTTATGA  
 CTTAATATTTTTGGTCATAAAACAATGAATCAATAGTAATTGATCAAAACATCAATACAAT  
 AATATTATATTATATTCAATTTCAAATAAAACACGAACTATTTATTTAAGAAAATATTTTC  
 CGCTTTAAGTTACCAGCAAGCGGGACAAAATGGTAGGCAGTGACAGAAGTAGGAGAAATG  
 GGCGAATGATGATGAAAAGCTAACTCATTATGATGCGATGTAACGGTTTGTCCGACGGATC  
 ACATGATATAATGACGTGATTATTGCTCTTCTATTCTTCTACTTTTTTTGCGTCATTGCCAATC  
 ATTTTGTCTCGTGAAGTCGTTATTATATTATGAATTATTATATTACGAATTAAATTGC  
 ATGTTTTTTTTTTGTTAAAAATGTTAAAAAATAAAGTATATTTTCATATTATTAAATTATTA  
 TCATGTTACATCATTTTTGATAATCATCTATGCCG

33. >MSTRG.717.8 Gene=MSTRG.717

AGTAAATTAATAAAGACAAAAATCGATTTGAACCTCATGGCAACGAAAGGTCATTGACA  
 CCATTGACGTAACATGTATTCAAGATGAACCACGATTCAACGATTTGTCGTCAATATTTCTA  
 CTGTAGTCAACGTAGACATCGTATCAGAATATGTGAAAGGCAAAGAGATGTTGATAGAAA  
 TGAAGATAGAGGAGAGGACGAGGATGAGGATGCTAATCCATTGGGAAAATGGCCACATGC  
 CCTTAGTCCAGCTTTAGCATGTCTTAGTTGCACCCTTGGTCTTTTTAATATAAGTAGATTTTCT  
 ATTCTCAGTATACAATTTGGAGCAAATTTCAATTGTACAATTTTAATTTTATCTTTGATATTG  
 GGTATTCCACTTTTGACATTACATGTATGTCTCGGTCAAAGATTGGCGGCTGGATCTGTAAA  
 TATGTGGAAAATTTACCTGTTTTCAAGGTGTGGAATAGCTCTTCTAATTGCACAAGCTTT  
 TATTGGTATTTATAGTGTGTTGGCATATCTTGGATGTTGCGTATACTTTAGAGATTCGTTTATA  
 ACGAAACAGGATAAGTATCGATGGGCAGAACCATTTTCTCTATACAGGGATGATAAATTTA  
 TACAAAATAATAGTAATTTGCATAAATTATATGAAACAGTACCAGATTATTTTAGCGGA

34. >MSTRG.723.1 Gene=MSTRG.723

AAAGATTTATGCACTAGTTTTTTCTATGATATAATTGTTATTATTATACTTTTTATATACTTTT  
 CTTTAAAAAAAATTATTATAAAATTATCTTATTTTATTATTAAATTTTATAAAAAATAAAA  
 ATATTTTAGATTATTGATATATTTTAACACGAATTGTTGTTTACTCAAATCATTTCAAAGAAA  
 GGTAGGTTAAGAAGTGTTCTCTGAAAATTTTAATGTCGTTATATGAAAGGTTGAAAACAT  
 TTCCACAATCTTAAAGTTTCATCAGCTCCTGCACTAAGAATTGTAGTACCATCTGGAGACAT  
 CGCTAAGTGTAACACGACTAGAATGGCCTACCAAAGCAAAGAACACACTTGTGATTTG  
 GTATCTACCATATTTAAACATACACCT

35. >MSTRG.752.3 Gene=MSTRG.752

GGAACAGTAACACTCCTGTCCGATAGTCTGATGCTTCCCAGGTAAAAATCAGCGCATTATG  
CGGCCATTTAAACAGACCACATCATGTGTCCGGTACTTCACGTACAGCCTTTTAAACCGTGTC  
GTCATCGAAAATTGTTTGTTTACTTTGTAAAACTAACTGTGGAAGTGAACCTGGGACTATCT  
TTTTTCAACAAAACGAACGAAATTCCTTTACGTTTTTCATCGCATAAATAACGATGAATTGAT  
TTCTATTATCAACGGTAACTGAAGATCCACGTAAATGCGAAATGTCGCTGTTGGCTATGATT  
ACAACGCGTGGACGACACACGATTCTTAAGAGACGAACAGAAACGAAACGTCGAATGAT  
ACGTAATCGGTTTGAAGTGAGACGAAGCGGGAGG

36. >MSTRG.771.2 Gene=MSTRG.771

TTCCACGTCCGAAAACGCGCGCTCCAACGCACCCGATGCGAGTGAGCTTGGCGCGGGCTCT  
CCCTGCTCTCTCTGCCGCGCTGCGCTGCGCCCAGCGTAAGCTGAACAGATCAAAAAGTAAGT  
GCGCGCGTGTGGTTTCGTGTGTGTATACATGTGCCATCATCCGCGTGAGCGATAAGCGGGAG  
AGAAGAGGACTCGGGCCAACAGAAGCCGGAACCAAAAAATGGATGCGACGTCCTGCGA  
CTCATTTCCGGACTGCTTTTGTTGCTCTATACCGCCTCACACTTCAGTCACGCCAACAATGG  
ACCCAATTATTACGGGAAATTTATCGGAAAACCTGAAGAACTACGCGCACGGAATCAAGGG  
GGACGTATACGCAGTGGACGACACGACGATATTCATAAAAGGATTCTGCTACGATGGGAC  
CGGACCGGACGCGTATTTCTGGGTGGGGAACACCTCAACGCCCACGCCACAGGGATACAT  
CGTCCCGTATCCGGAAATGGAGAAGATCAGGTAGGAAGAAAATTCTTTTACTCCCCGAGA  
GCCAATACTCTCGTCTCGTTATACGGTCTCCTCGTTATATCGTACCCTCTTTTCGAATTCCTCC  
ATTTCTGTCGCTCTCTTCTCACTTTTCGACTTCCCCGAGAGAAGAGAAAACGAAGAAAAAA  
AAAAAAGAAAAGAAAAATGCGCGAGTTGCGTATGCGGTCAGGGTGATGGACGCTCGATGG  
AAACGGCGAAGGGGACGGGAAAGGAGGAAGAGGGGGGCGGGGGTGGCTGTTGGACGTAA  
GCGGCATAACCGTAAGGGATGAAATGAAACTCAAAGACTCTTGTTGTGCGCGTCGATGATG  
GGGTGGCCGAAGAGGGTAGAAGAGGGGGATGGAAAGAGAGAACGGGATTGCGGGGGTGC  
AGTTAATAAAACGGGAATTATACAGCGATCTCGTTTCGGATTTTCGTACGCGCGAGCACTTTA  
TTACGTTTCGACTCGCCACTCTCTCTTTTCATCCGTAGTGAAATTCGATGGAAGACGAACG  
CGGCGAAAACAAATGGTCTAAGACTCTTCTTCCATCCCCCTCTGTAAAAAGCGAGTCTTTT  
TAAGAGAGACTCGAGCCGCGTACAATAATGATGTCTCGTTTCCGACTGGGGATCCAATTGG  
GCGAAGATTATTAGAGGAGGATGACGGTATTAGAAGTATTTGTTCTGTGTCCACCAGGA  
CAGCGTCATAGCTCCACGTCTCCACTGCTCGAATACGATCGATACATGGTTGTTTGCCAAAA  
TCGTCGACGCGTATCACCCACCCCCTCCCTCCCTCCCCCGACCAAATCGATCTAGCCAGGT  
TGAAAAACTGGTCAGCGGGAAATGCGGTATTATTAGAATATAGTTATAGAGCACAATGTTA  
TATAGTGCACGCCTATATACGCCTTCGAGCCT

37. >MSTRG.782.3 Gene=MSTRG.782

ATCGTATTTTCGGTAGTTAATAATAACATGTCTTGGAACATCGTATATACTCAACCAATCAG  
GAGTTTCCAACCGAGAATCGCATAGCATAAAAAGTGGAAGACAGGAGCGCTGGAGCGCAT  
TTTACGTTTTTACAATTACGTTGAACGCGTCGTTGGAAGTTCTTAGTTTCGATTAGAAACAAT  
GGCTCGTACCAAACAACTGCTCGTAAATCAACTGGTGGAAAGGCGCCACGTAAACAATT  
GGCCACTAAAGCTGCTCGTAAGAGTGCTCCTGCTACTGGTGGAGTGAAGAAACCTCATCGT  
TACAGGCCTGGAAGTGTAGCGCTCCGTGAAATTCGACGATATCAAAAAAGCACCGAACTTC

TAATTCGAAAATTACCATTTCCAACGTTTGGTTCGTGAAATTGCTCAAGATTTCAAGACAGAT  
TTAAGATTCCAAAGCTCTGCTGTCATGGCTCTTCAAGAAGCCAGCGAAGCTTATCTCGTTGG  
TTTATTTGAAGATACCAACCTGTGTGCAATTCATGCTAAACGTGTTACGATCATGCCGAAAG  
ACATTC

38. >MSTRG.795.2 Gene=MSTRG.795

TTCTTAATTGTATGCAACGTTCTCGATACTCTTGCTACTCGATGCTGACTCGTCTCGTCCCA  
TTCAAACGAGAGAGAGAGAGAGGGGGAGGGGATCGTTGAACGATGACTAACCGTTTCCTC  
CTCCGTGATTGCTCCTCGTGACGAATAAATTAGTAGCCGGGCTGCTAATGAGAAAATCTTG  
GGCGGACAAAGGATTCGCAAAGGATGCCTCGAAGCACGTACCTCGCACGTATGGTTGTG  
TATTTATCGGCTGGATACAGTTTAAATCCCTTCCCTTGGAGCCAGGCGTTGGAAAATTGAATT  
CGCTTTAACTTAAAGGGACACGATTCTTCCTTCCACAATCCTTTCCTTCTCATCTTTTCCTCTC  
GATCTTCCGTCTCATCCCCATACAATTACGAGAATATTATTTTTCCCACTCGAAATACGTAA  
AAGATTGACGAAAATTAACCATGAACGATTGAGAATGAAATATACAACGATTAATAATA  
TAACCCTATCTGCTCGTTGGAACGGTCTATCCCGACCGAGGAGGAATACAGGCTGGTAACG  
GATCGAACCGAATATACCAGCCAGAGCGCGCAGTGGTGGCGCGTGCGCGTATCATCCCTG  
AATCGCGTTGAACCAATGAAACTCAACCTCTTCCACTGGCCTCGGGGGATAGAACATTTTCG  
ATATATATTTTCGGTAATTTCCATCCACCGCGATGTGATCCCATAAAAATCGATCGTCGGAGC  
GAAAGAGGAACGGGGCGCGTGACAGGGAACGGTGTGTCCAGCCAGTGACCGATCGTCTC  
CGTTGTCCAGGGTATGTTGACGAGAGGGCACGATCATCAGCTACGAGGGAAAACGTGTGCGT  
GGATCAGTGTTACCCGGGCGGGGTGGTGGTGGTGGTAGTAAACGGTGGCTCAACACTG  
GCCGCCATCTGCTGACGGTCGCTTTAAGCTCGAGCCTTCACTGGTTCCCCGTGAAGTGCATA  
GCCGAAACGAGACGTTTCGGCTCCGAAACGGCACAAAGCACGAGCTTATTTTCGAGGGAATC  
GAGGGTCGAATCCTCGTCCGTGACACTATCGACGCGCGAACTTGCCGCGACGCGGGTTCTC  
GCAAGTGTGTTGTTTCCGTGGTTATCGTGGTGTGTTATTTCTGCCGGAATCGAAGGGGGCGAA  
CGATCAACGTATCAACGAGCGTTCCAGGATGACGGAGACGACAATGACGTAAAGCCACG  
AGGCCAAGTTGAGCGGAGAGAGATCCTGGTGGCGGCTCGACTCTGTTTCCAACATCATCCG  
ATCCCGATCCCCGGCCAAAATCTCTAATCCTGGAGCGATTATCTTCGATTATCTCGACACGA  
CTTGAAAAATCATGGGAATTTTCGGAATTGATCGCCAATCTCGATGCTCGGATCCGGACAA  
GGAATGATTGGACGAGTGATGGATCGAGGGAATATTACTCGAACGTACGATTATGATAATT  
TTAATAACCAGTGATCACTCGTGCAAATATTCGAGGGGAAAGCTAAGCTTGCTCGACGATT  
GAACTCTCATTTTCGAATTTCCAACAACAGGGATCTTATTTTCGTGTCAGCGTTTCTTTCTTTTT  
TTTTTTTCTCCCCAAAGACACGGTTGAAACTGAAAACGTGATATTGTGGAAAAAGAAACG  
TGATTCGAAGCGTTTAGGAAACGTGAGGATAATTCGTTTCGCGAGTGTGTCCGATGAAGGA  
AACCGATAGAAGGGTGGACAATCGGGACGAGGCGAAATGTGAAGGAACGGGAAACGCGG  
GTATCGAATTGTTTCGCTGCGTTGCACGACGTCGTGTTGAACGACGACGAGGCTGGTTGTTA  
ACGGAATATCGACCGAAGACCGTAGCTACCGAATTAGTCGTGGCGAAGGTGCGGCATAAAA  
CGCGTGCAACCTCGTTCCCCGAGATTTGGATCACCCACCTCGAACAGTTCGATCTGTCATCT  
CTCCAATCTGTCCAACGATCCGTCATCAAAATGTTGTATACATACAAACAATTGCCAACAAA  
CGGAACCTCGGCAAATCGATCGACCAGCCATCGATAACACGGAATAACCAGTTTCCGAT  
CAATCGTTCGTGCAAAGTGTTTTCTTTTCCGTTTTTCGTTTCTTCTTCTATTCTAAAAAACTT  
GTGTGTCAATTGTGTCTTGTATATACATGTATATGTACGTGTATATATAAATATATATACATA  
TATATATATATATCCCTTTCTCCAGTGACGCATATATAAATACGTTTTAAACGAGACTAAAAA

AAGAAAGAAAAAGAACTGACCTACAGACTCGTTCGTATGGGTCGATAATTAGTGTATCC  
AGATTAACGGGGCAGAGACATTGAAACTGAAAGTGCGAACTGGATGAAACTCCCTCGAAG  
AACAGTTCTCTGAACGAGACCTACTGACCTATCGACTGAGTGCCCCACCTCTCCCACCACC  
TCGCCACCGCGCATTTCCTCCCATTTTCCTCCTCTGTTTCCTTCTTTTTTTTTTCTTTTTTT  
TTTTTTCCTCTCATTTCCTTCTTACTCTTGTATTTCTCCTCGTGTAACCAATTTTCGAGTCGAA  
ATCGTGTTGGAGGACACCGACCGAGGTGGAGGAAGCGGTATTAGAAGGCAGGAGGGCG  
ACGTGGCTGCGCGTACGAACGAGCGCGGGTGAATCGAAGAGAGTCGTTCTTTGAACGAGA  
CCCACTGACCTATCGACTCGTCGCTCCACTCCTCCCCGCCGTTTTTCTTTCCACGCCACCCT  
CGCTTCAGCTTTTCTACCGCCCTGCGTTTGTTGGCGTGCCGCGTCGGCCAATTCGTAATTCCA  
TTTCGTGTCTTACCCCTGGACAGGGGTAACGTTTCGAGAGGGTCGATATTATATATACGTAC  
ATTCACATATATATATATAATATAAATACTAAACGCGTATATAAAGCGACAAACGAGTGCC  
TAAAAGTATAATATTTCAATTCCGTACTTCTGACTGATCTATATCGTAATTATTTTCATCGAG  
AGACTCTCTCTACCCCTTTTCAATTCTGTTTTCTCTGGAAATTTTATTTTTTACATTCTTT  
TTTCTTATTATATGTAACAATAGCAAGCTGTATTTTATATATATACACGTGTATCAATCTTTTT  
CTTATTTCTCCTATAGTTTCGATTAAGCAAAATTTTATTGATTGAGGGTATCGATGATGATAC  
AAGGGTGAAGAGTGCCTAAAAATTTATGCCTTTCTCGACTGATTATCTAATTGATTATATC  
GACACGCGATATTATTTTCGTACGTGAAATCGTTACTGCAATCCTCGTTCTTCTCTTCGAAAT  
TTTTATCTCATAACCCAATTATTTCCACTTTCTTTCTCCCTCCCTCTTATCGCGAAAGAGATC  
GTGAAACGGTCTGAACTCTTCTCATCGGAAAGTAACGAAGGTCGACAACTACGCTACCGC  
GATCGATACGATAAACAGTGCCTCGAGATTATTTCTCCACTCTCGACTGATCGACGAAGAA  
ACATATACATCGTTACCTCGTAAGCTTCCCTCATTTCTCGCCGTTTTTCGCTTGGGCGTGTCC  
TATATTTTCATCCCGTTCTTTTCGTTTTCAAAGGGGACAAGACTCGAAAAACAGTGATCG  
AAAAAATATATATATATACATTTCGACGAAGAAGAAGAAAGAACTCTTCCATTTCGAAATTT  
TTATCAAAACATCCGTGTCTCGAGATCCGAGGAAAATCATTAAATTAACGATCGAAATTTTA  
TCCAAAGATTATCGTGTCTCGACCTACAACCTCGAAGAGATACGAAAAATCGATCGACGATC  
GTCTCTCCACGCCTTGCAATCCCGATGCAACGGCAACGGATTTCGCCACTGATCCGATCTCA  
ACCAACCTAATCGTCCAACCTTTTACCGGGTCGACATCACGATCGATCGGATGCACACACGG  
AGTTGGCGGCCCTTGACAGTGCATCTTTAATCTCGTTTCGCGGAAGAGATGGCATCCGGATC  
GCGATTTCGAAGCCGTGCCAACGTCCACCGACGTGAAACGGAATTACGTGGCAACCTTCGG  
GGAATTTTCTCTTTGTAAGAGCGCGACGTGCTGGTTCAGGCCGTTGACAATAGCCTGATCGT  
AAAACGTGTGGGGTGGCGCGATAAGAGAGAGAGAGAGAGAGAGAGAGAGAGGGGAAAGTCATCA  
GCAATAAAGTATCGTAAGAAGGAATCAAAGCGAAGGAAGGAATAAGAAGCGAGCCAAG  
GTCGAGCGTTCTATCCACGAAGAGGATAACGATAATAAAAGACATTTTCGCGTGTAACG  
GGAAATATTACATCTCGAGATATATGAGAAATAGAAAAAGAAAGAAGAAGAGAGAAAA  
AAAAGGAAAGAAGAGAGAACAGTTCTGTGATCGAACGGCGTGAAAAATAATTCGTTGAAA  
GAGTGCGCAGGGACAACAAATTTTTTTTCTTCTCTGCGGAACGATATCCGAAAAACGTGTC  
CGATCCGATATCTCTACTCGCCTCGTCGCGGAAACCGTGTGACGATCGAATCGCGTTTTTTCG  
TTTCCCCGAGCGGTGAGAGAAAAATGTCGCGGTTTCATGGCGATTTGAAAAGAGAAGGAAAA  
AAGAGAAGGAGAAAAAAGAGACACAGGGTACCGTGAAATTGGAAAGGGATAGAGAGAG  
GGGAAAAAAAATGGCGGAAAGCGCGGCGAGCCCGGTACCGTGCAGGTGGCCGCGAAT  
AGCCCGCAGCAACAGCAGCAACAGTCGCAACAACAGCAACAACGCAACAGAATCAACA  
ACCGCCGATATAAGCAGCTCGCAGTTGGCGTCTCCACCGATCACGGGCACAGGTAAGTTT  
CCTTGTCTCCCCGATTTCCAAGAAGGTGTTCTTCACACAAGCGCAAGAACACTTTTCTCCG



GTGAGTACTTTACGGAATCAACGAAAATAGCACCGATACATCTCGTTAAAGTTTCCCCC  
CGCCCCCCCCCGTTGGCGGTGTCGTCGACGAACTTTGCATCCTATCCGCACGACGGGATAA  
AAATGTATAATTACAGGGGAGCGGATAAACAGCGGTGTTACAAGTGATCGAAGCCAGCTGG  
CAGTCCGGTCACGAATTTATTTACAACTATGTAACCTTTCTAACGCTTGGAAGTGAAGTAC  
AAAACGCGAAGGATTGCGATCCCCGGGATTTATTTGGAATCCGAACATGCGTACAATGATG  
GCTGTCGTCGCGTTGTTGTAACAATGTCTTCGTTAACTTGGAACGGAGCACACTCGGTGTAC  
ACTTTTCCTTCACTCCTAGGAGAGGCCTAGAAGAGAAATTCAGAACCCGAGGTTTATTCGG  
AATTTACGATTTTTTTTTTACATTTTCGAAAATATGTAAACATAGCGAAATAAAAGGG

39. >MSTRG.821.1 Gene=MSTRG.821

CGCGCCGAACGTCGAACCGAATACATGGGGGTGTTATACGTTTTTTCACATTAAATTCTTGT  
ACGAAATAACGTTATATTTACGCGCTGATCATCGAAACACAACATCATCGTTGGGAAAAT  
TCGTTAGTGATTATCAATAAAAGAGTGACGTTTCGATATTATCGACCATTTAGTGCAGTGTC  
GTAACGAAAGTTCTACTTTTTTTTCGCGTACTTTTTTCCGTAAACTCGCTTCGATTCGATTGTC  
GTCGATGATCGTGACAAACGAAAAGGAAAACCTTCTTCAATTACGTGATCTATCTTTATTAC  
TAAGCACAAATTGACAGCATGCATTTGAGTGATGATGGATAGCATTCTCCGGTGAATGCAT  
ACCAGTGAAACGTTCTGTTTCGCGAGACCACGTGATCAGTGTTGGGAGGTTATGTAAACGAC  
GCATTTACAAAGCAGCGATATTATAATCTGTCAGACATCGATATTTGTGCATTGCGTATAAC  
CACGTTGTTGATTGGCTGTAATTTTCGATATCTCGAATAATCGATGAGAATAATTGCCTGTAC  
ATATAACGCCTGATCTGTTTTTCGAGTTCAATCGATACTAATTAATCGATATTAGTACGTTAA  
ACGGTCAATGTGCCGAAAACGTTTCAAATTTAGTTTAATATGCGCAACACGGAGAAACGGA  
CCGGTTCAATGGCGTCGATTTGACTTCGTGAAATTCGTGTTTGTCTTTCGAAGCATAAAGTC  
CTCGTGTTACATGCCACACCTGTGTTTTACTTTTTTTCGAAAGTGTTTCACGGTTAATCTAC  
ACTCTTCGATGAACAAGGGCGTATGATATGTTAATGTTTGTGTCGCGTTCACTTAAATCTTGT  
GTGTTCTGTGTGTGCCAGATGTCAAGACGATAATTGGTGCTGTCTTAAGGACGAGTGATTCA  
TGTCACCATGCTGACGATTGTTTTCTGCTCGTTCTGGGCCAACTGGTGGTACAGGCGGACT  
ATTTTGAGAATATTTCAAAAGAGGAATAATGGAATATAAACGTCATGGTAACAGAGAATAT  
TCGAGACGAGGAATAATGTAAAAGCGTCATCAACTAGTGACATCGTTTCAGTGAATCGTTC  
TCACTTGACAGCCGACGAATCGACGAGGAGGAGGGTGGTGAAGAGGGAGGGGTGTTTGA  
CGGGCGTTTTTCAGAGGCAAAGGGATAGAAAGGAAAACGAATGGGGGAAATATTAAGCCG  
GCAAAGACGAAAGTCTCCTTGGCTGATTTGACATTTCCGTGTGCGTGTGTGCTCGCCGAGGT  
CCGTGTTTTCATCGCTTCGAAACGGAAGCTTCGGGAAGAAGAGAAATGGGAATATTGGGA  
AAATTGCTTTCGTGCGGTGTCCCTGGTGTCCATCTGGTGTCTGCTGATCGTCGAGCCCGGCAA  
GGTTCAGAGGGAACAGGATCATCTGGGTAAAGTCACGAAGAATCAATTTGGATTGAAAATA  
ATTTCTACGCATCTTCTTCTTCATAGGTATTTATTATAATTATAATTATAATTGTTTTAAAG  
AATATAATCGATATTAGATGACAGAATATTTTACAAATTTATCATTATTTTATTATTATTA  
CAAATATACAACAAATAATAATTTTGATCATTTCTCTTTTTAAAAAAGTCATACGGAAAAA  
ATTTTCTACGCAATATGTACTTCTTTTTAAAAATTTTAAATTTACGAGATATATTTTGGCC  
AGTAATGTATCCAATGCATCATCTTATTCCAACCAACGTGCAACGAATCTCCCTCGACCTG  
GTTACGTCCAACGAGCACGAAAACCTCGCGCCAGAAAATAATCCTCCTCGTAACGTTGAAA  
AGAATTTTTCTCCCTCTTAAACCTTTCAAACGTTACCAGTAAACAGCGTGTACGAAAAAGT  
GGCTCGAGCTTGGCGAGAGATAGCCAAGTATTGTTTTTTAAATCCGCACGCGTACACCCGC

AAGTACTCGCGTGTGAATCGAGGGCAAAGTATGCGGTGCGTGCAGAAATAGCTCACGTTTA  
TCGATGCTTACGCGTTGGAACCTCTTTCCGCCCCCTTCTACATACGATGCATCTTGCGAGGA  
GGACAATAAAACGCGGAGGGATGAAAGACGAGCGCGGATTTAAGGAATGTCGAGCGTCTT  
GAAAGTTCCCTCGAGCGTCGAGCGGAATATTGAGCAGCTTATGGGCCGTATCGCAATTATCA  
ATCGATTGAGTGGATGAGGATTCTCGAGCGGAGACGAGTGCAGTTTTGAAAAGGATGAAT  
CGATTGCAACGGGGGTATTAACGGGAGATGGCATGTTGTCGCGGATTTGTTTTTAATTGGT  
TTGCTTTATTTTCTTTTTTCTTCTTTGAATATGATGCGAACTCGAATCTGTTTTTGTAATA  
GACATAATTATTGATGTAAATTTTTTTTTTATATATAATTCGTTTTGAATCTCGTTAGAATAAA  
T

40. >MSTRG.835.1 Gene=MSTRG.835

CGTTTGAACGAGGCCTTATAGCGTATTCCGGCGTCTCCGGTATTCCGCGTGCACAACGGATC  
AGAACACGTTTCTTCGATTGTGACGAAGGGGGGAAAAGTTTAGCGAGGAAATTGGGATTGT  
TGGAGACCGTGGAGGACCTTCGTGAAAGGGGATGACTCGAGTGGATTCAAGTTTCTGTGAA  
GGAGATTGTAATATTTCTGTTAATAAGTTTTGAATGAAGATTGCGGGAAAAGAACATGATA  
AATAAAAGAAGAAAAGTGAGAAACGTTATCATCATCAACGAGATATCTAAATGCATTTCC  
AAGAGGAAAATCAAAGAAGACGCCTATGTGACGCTAGTCGTCTCAAGAATTATTGATTAA  
AACGAGAA

41. >MSTRG.847.1 Gene=MSTRG.847

ATATATGATACACATTGATATATACATACATTGAACATTAGATTTTCATAAGCAATGTTATCA  
TAAATTACTTCTTAAATTACTACTGATAGAAATTTCCAGTACACTAGTAAAGTAAGCGACA  
CTTCTTAGCAAAAAACAAATGTCTACATCAACAGATGACAAAACCAGCCTAAAAAATGGC  
GAAGAATTAAAAGAAAAATTTGATCCTACTGGTTAGAATTTTCGTTCTTATGAAGAAATTAC  
TTCAAATTTAGTTCTATGTTTCATCTATTAGATCAATATTTTATAGAACATCAACATATTGCA  
TACAATCCTTTAAAGGGAGAATGGGTATTAGTATCACCACATCGAATGAAACGACCATGGG  
GAGGACAAATTGAATCAAATGTAGAAGAAGATCTTCCAGATTATGACCCTAATAATCCACT  
TTGTCCAGGCAATATTAGAGCTAGTGGACAGATAACTCCAATATATGAAAATACATATTCA  
TTTATTAATGACTTTCCTGCATTATTGGAATCAGTCCCAGTCCATCAAAATCAGAAGATGA  
ATTATTTCAAATGGATGCTGCTAGAGGTATTTGTAAAGTAATGTGTTTTATCCAAAATCAA  
ATGTAACAATAGCACTTATGAAAATTTCTGAAATTAAAGAAGTCATTAAGATGGATTTT  
TGAAATGCTTGAGTTGGGAGAAAAATGGACTTGGGTACAAATATTTGAAAATCGTGGTGCT  
TTAATGGGATGTAGCAATGCTCATCCTCATTGTCAAATTTGGGCTAGCTCTTTTTTACCAAAT  
GAAGCTAAAATAAAGGATAGATTTCTCAGTGATTATTATAATCGCAATAAGAAACCACTTC  
TTATAGATTATGTGCAAAAAGAGCTTTTTTAAAAAGGAACGCATTGTAT  
TAGATAATAGAGATTGGGTAG

42. >MSTRG.862.1 Gene=MSTRG.862

AAAACATTAATCCTTGTGCCACCCACCAAAATGGCTCCTTTATGGGGCAATTCTAGGTGTT  
TGACGTGAAGTTATTTACACACCTGGAATTAAGCCTTCATTGAGATAAGTTGTAGATGTCTT  
TCTGTGCACCGTGTGCGTGAAACAGATCAAGAAAGAGTGCGTGTTCTATAGCAGTGAAGAA  
TCGATCGAGTTCCTGAAGAAAAAATTATACAGGACGGCCGTTGGTGTAATAGTTTCGCTTG  
CTGAACAAAAATCTGTACAGATATACAGTGCCATTCCAAAGAATTATTGCTCACACTTGTG

CTAAATTATGAATGTTGTGCTTTATATAAAGAAATAAAGTGCAAAAATTTCTTAAAATCTAT  
ATTATTAATTTCTCTAATGATGTAATTTTATCATTTATAAAGTTATAATAATAATTATATTAA  
GCTC

43. >MSTRG.887.2 Gene=MSTRG.887

CGGAAATATAACACAGATAAAAAGAGTGTGCGTCATTAGGTATTTCCAGATATAAGATGA  
AGTATATGGTAGGAAGTATATTCAAACGTTGAAAGATGGCGTAACAGGAATGAATCAATA  
TGTA AAAATTAGAAATATAAAATCGACAGTGGTGAGGAAACAACCTTGAGACGAAGGATTG  
TGTACCTTCGGTGATCGTCTCTTTTCATCGGCAAGTTTTGCTCACGACGAATACGAAGCAAAG  
CCTTGGTGTAGAGATGTATCTGACTCCTGCCACTCTTTATGCTCTCAGATTATCATTGCAACA  
GGGAACCGTTTTCGTCTGTATTTCTAGGAATATGGTCGAACGTAATATGACCAAATCGGCG  
TATATCCTTGCGACTGTTGGCCTGTCTATGAGTATATTTTCTGTGAGAAAAATGTTAACCTCT  
AAACACGGACGTCATTTGTAACAAGTTTATTA AAAATCAGCAGCAACAAATACAGTTCTAAA  
AAGAAAAGAAACGAAAAGAAAATAGATAAAAAAGAAAGAAAAAAATAGGATTCAT  
CATATGTGAATCAATTATTATTGGCAAAGGAAATTTTTCATCGAATTTTAGCATCTTATTCAC  
GCCGAAATGTATACTTATTTTTTATCGGAAATCAGTTGTCTTGTATTATTGAACTAATCTTTT  
ATAATCGATCTATTATCGCCTCCAAAATATTGAACATTTCTTAATGTAGCGTATTAATTATA  
GTAAAC

44. >MSTRG.909.2 Gene=MSTRG.909

TGAACATCGAAGCATTCTATTGGTTATTTCTTATAGTAGTGCTATGTTATTAATCGATAAA  
GTTAGAAACAATATCGAAAAAGTTAAAAAACTTTAAAGTCTCTAAAACGTAGAAAGAAATG  
TATTAATGATAAATTTATTTTGTGTCTCATTAAATTTGAAATTTTAATGAAACAGATTAATTG  
ATAATAAAAATACTATTGATTTACTTATTTGCTTACAGTGATTATGAAGATGAAATTTGATC  
AGCAGAAAGCTTTAAAACATATACAAGAAGTGGAAGAAAAAGCAGGTGAGATTCTTACTG  
ATCGACAAGAAATAATTGCTTTGGATAAAAGAAGAAATAATGATAGAGTTGGAATGAGGG  
CATTGCAGAAAGAGAATTGCGAGAAAATTTGGTTAACTATTGGACCATTATTACTTAAAAT  
GCCATCCAAAATTGCAGAAGAATTACTTATTAAGATCAAAAAGAATGTGACATAGAAAT  
TAATAAATTAAGAAGTAATTTAAAAGTTAAAGTGAATGAATTAAGAGATTTAGA ACTTAAT  
CCATCTGTTCCAGGTTTAATGTTGCAACCTATGTCTTATAAAGAAATGTCAGCAATAAAACA  
AAATTTGGGTCA

45. >MSTRG.913.1 Gene=MSTRG.913

TTGGACGATGAAAAATTGATGAACGTATTCTTTTATTTTCGCTTTCCAATTGGTCGAGTCAGA  
ATTGTTGAAAAAAAATTATTTTCCAAAAATAAATCAAGAATATTGGAAAAAATTAAATTGA  
GGACGCAATTTGATCAACCCGCTTGAGTATTAGTTTAAATAGTTTGAATATCGAAAAAAG  
AATATTATAATATTCTAGAATACAATATATATTATATTGTTTAAAAAAAATAAATGACATCT  
TGTTATCAGGATGACCACGATCGAAGCGTCAGCTCATGAATTGAAAAAGAGAAAAAAGAG  
AGAAAGAGAGAGACGAGAGGATGCACGATTGCGGAACAATGGATCGGATATGCGGGTCA  
ACGATGCCAGCCAACGTTGTGCCCAATTTTTCCTTATACTTAACTTTGACCGAGAGAGTCCT  
CACGGCACGGCGTAGATGGAAAAGTCGGGCGGTGGGTTATCGATCATTAAGAACCAGATA  
TATATGCATTATTCCGTACCAAGTACGGCTAGAGCTATCGAGTAATTTAATATAGAATTA  
ACAGTCAACTGTATCGCGATTAAACGCGCGCGCGCGCGGAGCACGAACGAAGAAAGG  
CCTGCATCGACTATCTTTCCTCCACACTTTTAACTGATTTCCCGTTCTTCCGAAAAA

AATCCAATTCCCGTTATTCTAATATTCCTGCCTCCCTCTAACCCCTCAACAAAAACAAAACAA  
CATATTGTAATCTATTGTAGATTGTTGTAGATAAATTATACGGTTTGACCGTACATTGTTACT  
TTTTGTGACAATATAAAATACACAGATATATAAGGAGAAAAAAAAAAAAAAAAAGAACT  
GAAAGACCGCAAAACCATTTGACGATCCGTAATTTGTGGGATGGGC

46. >MSTRG.944.1 Gene=MSTRG.944

TTATTATATTATTCTATACGTTCTATATATATATATATACTATGTGATCTAACTTGTGCATG  
TTAAATCGCAGTTTTAATATCGAACAATTAACGGTTATTGCATATTTGAAATACAATTGGAT  
TTTATAGTATAAATTTAGTAGTTACATTTATAATTTTTATTAGAAAGTAAAGTTATCTCATAC  
TTATATTTTCATTAAAAATAATTAATTTGTGAATTAATTTTATATTTACGTAAAATATAA  
TTATAAGAATTATATTATAATTATTATATTTATAATGGCATTCTCTCGTATACCTCGTCGTGA  
AGGTTATATAGTTGCAATATTTGGTGCTATCACTGGTTATTATATTTGGAACCAGCCATTGA  
AACAAATTTGCTGAAAAGAATTTTCCAATACAGACTTAAATAAAGATATGTACCATGATCA  
AAAATAAATTTTTTATTTTGCATCCTATAATCAAAATAAGTTGTATAACAGTTGGTATTCTAG  
GTTGTTTTGCTACTTATAAATTTTATTTCAAACAATATGTTGATTTTGTGCAAAAAAGCAAG  
CTGAAGAAGAAGCAAATATATTATATGAAAAA

47. >MSTRG.950.3 Gene=MSTRG.950

CATCTACTGACTTATGTGTTGTTACCGGTGTGATATATACTATTAACAGGTTAGTCGGTATTT  
AACATCAATGAGATTATCTTTATATTTACATTCTCTAAGTTTTTATTACATTAAAATATCATT  
TAATTTTTTATTTAAAGAATATTTTATTTTATTCGTTATTCTGTGCTGAAAAATATTTAAGATG  
GCTTTAAAAATTTCTGTTAATACTGGAAATATTGATTTGGATAATAAAATCAATGAATGGT  
GAAATGGAACAAGGATGTAATTCATGAACATAAAGTTCAAGAACTCATCCTTAATAATAAT  
AAGAAAGTATTATCTTCCTTATTTTTAAAAAGACTTGAATTTGGTACAGCTGGTTTAAGAGG  
TCGTATGGGTCCAGGATATAATCAAATAAATGATTTAGTTATAATTCAAACCTGGTCAAGGTT  
TATCAATGTATTTACTTGATACCATAGTTGATGCAACTGAAAAAGGCATCGTAATAGGATAT  
GATGGACGTCATTGTAGTAAAAGATTTGCAGAATTAAGTCTGCAATTTTCATGGCAAAAA  
ATATAAAAGTCTATCTTTTTTCAAAGTTGTACCAACTCCATTTATACCTTATAGTATATTGA  
AATATAAATGTGCTGCTGGAGTAATGATTACAGCATCTCATAATCCTAAAAATGACAATGG  
TTATAAAGTTTATTGGGAGAATGGTGCACAAATAATATCACCACATGATAAAGAAATTCAA  
AAATATATATTTAATCATTGGAACCAATGGAATCTTCATGGAATATAACAAAAATTTATG  
AAAATTCTTTATATCTAAATCCATGGG

48. >MSTRG.955.9 Gene=MSTRG.955

GGCGAAGGTCGTGGTGGTGGTGGTGGGCGGTGGAGAGAGGGTGGCCGGGATGGTGA  
TATAAAACCGGCGCACATGATGGGGATCTGGATCCGATAGGGAAGTGGTTGCGACAACGG  
TCCGTCCTACCGACACGCCAAGAAGCGGAGGCTCGGTGAACGAGGCCGGTGTTTTACCC  
TTCGTAGCAGGCAGGAGGGTGGACGGCGTGCTAGAAGAACCACGACGAGCACCACCAGC  
ACAACGGCGTCCAGCTCGACGTTGATTTCTCTGTGCGACGAGGTGGCGCAGCCCGCGGCCC  
TTTTAGCCCCCGAAGAGGACTTATGGTCTACCAGTTCTTCCGCTACAACCAATGTTCCAGTC  
ACCTTAGATACAGCTGCCGCTTCGTCAAAGCCACCCTCGGAAATGGTGGTGAAACCTCACA  
GCAAGGTCATACTACCGTGCGACCTGGAGGAAAATTACTCGAGGCTGCTGTTGCCCCGGGT  
CAGGAGCTACAGAATACGGCCAGCGACATGGTTGCACGAGGGAAGTCCTGTAGATATGAT

TACGATCAACACGAAGACGGAGATGAGCGGGACCGGACATAGATATATCGGCGACTCCAT  
GACTGACGCGTTGCACATAGACAACGTGAGATTAGAGGACGACGGTATATGGGGTTGCAG  
GCTCGAGGACGATCAAGGGAAGATACTTTCCGGCAGGCCTGTGAAACTCGTCGTCCTCGG

49. >MSTRG.997.15 Gene=MSTRG.997

CGAGGTTAGGATAATAGATGTTTCTCAGCCTCAAGACTTATTTAAAAGTGGTTTTCTCGATG  
ACTTTCCATGATGATAACATTGATGGCAGTTTTTTTCGCATCTAATGGTAGTGGAATGTACAA  
CTCGGATGCAGAAGCGTGGACATTTTTGTATAGATTATCTTTCGTGTAACGTTATCAGTTCG  
CAATGGAATGGAATAGAAATAGTAAACGCTCTCGAAAACAGAAACAATTTTTCAACATGAA  
CATCGGAGCTACGAGTTATCCAGCCGGTCCGCGCTTCCAGACAGACGTATAGATCGCGGCC  
CATAAATAACAAGGAAGGGAAGGGCCCTCGTCTTTAATACGATCCCCGTTTCCCGAACTCA  
TAACCGTTGATCTTCCGCTGGAATTCACGAGGAAAATGCGACAAAAGTTCACCGCGCAA  
GAAGATGCACACGATGTAACATTCAACAAACACCGGTAGACAATGTTCCAAACTATACAA  
CATACATTTTGACAAGTTCCAGTTTCGCTTCGCAAGCAGCCGGAAATTGAACACCGGCTGT  
GTTTCCTGTATCCACGGCGGCGAGCCAGATTCCGCGATGGTAGTTTTACCGCGCTTTCAAGA  
CAAACCCTGAGACGATGAAACGGATTTACACGATAAAATTATCAAGAAAGAAAATAAGA  
AGATCGAAATTGAAAAATTCATCACATATCGAATATATACACGTTTCATGGATCATCTTTGA  
AAGGATTCTAGAAGTTGATTGAAGAGGAGTTATACAGTATCGACGTCAGCGACAATGCTAG  
GCCGAAAGTTGTAGCGGGCGATGTCGGCAAATTGGTGAAAGGGTTGGCTTCAAACCTGAAAT  
TGAGAGGGGTTGGACGTCGCCGGTACCCAACATCAGAAGGGCAGAGGGCGGGATACGACGC  
TTCTGGGCTGTCGTGAACCTGGGCTGGAGCCACCGGTGTACTTGGCAGAGAGTGCTTTTCA  
TCTCCGTAAATGGACCGGCGGAGAAGAAATCCAGCCGAAACGAAGTGCCTGGGGAGAGTT  
GACGAATTTATCGATTCTGTACGGGGTAAAAATTGCACGCGTGCACACGAGAGATTTGAA  
ACAGAACAGGCAATCCATACTTCCAACCTATCTCAGAAAGTGTGCGCAAAAATCAATCGAAT  
AGATGCGTAGCGAATTCATTTATCACAGAGTGAAATTTAGTTACGGATTCTCATCGAGGCA  
AAGAAAAAGACGGCTAGACACGACTAGAGACAGAGAGAGAGAGAGTAACTTTCTCCGC  
GCGCTTTGCGGCCGTGAAGAAGGGGGTTGTGCCGCTTTTGTCTGTGCTGCACAGACGCGTGG  
AAAAGAAGAGGCCGATGGGCAGCCTCTTTAAAGAGTAATTACGCCTACACTCGATGTATCC  
TGCGCCCCGTGATATTCCTTCATCGTTTTTTTTTTCAGGTGAATACGTGTTTGTGTTGCCATTGTTC  
CATCCTCGAGGAGCAGCCACTTGAAGTCCCATAACGCGTCGAATCCTTTAGAAAACCTGCGAC  
GAGAGGCGCGGGAGGATCGAAGAGACGAGACTTCATACGAGACTTCGTTTGACAGCCCAC  
TGGTCACCGAAGCGATTTTCGCTGCAGAAAAATGGAAGCTCGTTAACGGGCGAGGAAAATG  
GTTGCTTCGACTTGGTGTTTCGTGGGTGCAAGGTCGTTTTGTGAATCGGGCGGAGGAAGAGG  
AGCGAGGACGGAGGGAACGGCGGATGCGGACTTTGCGGCCGGTGCACAATACAGT

50. >MSTRG.1001.1 Gene=MSTRG.1001

ATTGACTAAGATAATGATTAAAGTCCGCTAATTCACCAGACATTTCTAAATATCTATGATAT  
TTATTTAATATTTTTGTAGGCAGTGTTAAAACGAATATTTGACCAATATCTGTAAAATTTTAA  
AATTTATCATCGAAGAAAGTGGTTAGAAACAGCAACGATGAGTAACGATCAAGCAAACGA  
ATTGTCTGAAACAGTTGAGTTATCTTCCAATGACATTGAGAAAATAGAAGAAGCAAAATTA  
AGAGCAAAATTTCCAAATACTGGACGTCCAATTAGTGGACATTCAGCATTCCTACAAAAGA  
GGCTAGCTAAAGGGCAAAAATATTTTGATTCTGGAGATTATCAAATGGCAAAAACAAAAT  
ATACAGCTAAGCCTAAGCCAGCTGGTGTTTTGCCAACAGGTGATGCTATACCTACACCTGA

AACAGTACCACAACGAAAAACATCTATAATTCAACAAAAATTTAATACAACAACACTACATC  
 ATAAATTTTTGTACTGTTTTAAAAGTATTGCAACTCAAATGATATAATGTGGTTATATGCAA  
 TCTGAATTTTAATTTAATTCATATCTTTATATTTTATAGACGGTATTATTTTGAACTTCAA  
 CTTTTATGTTTTTTGAATGCTTATACATTATCAATATATTGAAAAAGATTTATGTTTCATAATA  
 ATATGTATATCTTTTCAGTACATCATGTACCATAAAAAACATTCCAAAAATGAAAGTTTTTAA  
 GGTACTTCAAAAAACAGAAATTATATACTTTATGATAATGTATCATGTATCAAATATTATTA  
 TTCTGATCTTTCTTTTATTTAAAGTGAAAGTGTTAATAATTTTGTATTGTTTGAAATGATATTT  
 TAGAAACATAAATATAGAATTTCAAAATTTATTTTTAAAATAAGTAGTGAAGTTAAATATTT  
 AAAAATACAAGATTGGTGATAAAAAAGACAATGTTGTAACCATTTGTATATGCAATAGAAT  
 GAGATATTATACAGATCTGCATTTCCAAAGTTGCTGTGATGTGCTTAGACTATATTCTTATA  
 AGATGTCAGATTGTCCTAAAATCTGTATTTAACTTAAAATAATCTTAATATAGCAGTTGTTTT  
 GTTTATTGTAACTATATTATTAATATATTGCAATTTAAATTTA

51. >MSTRG.1075.24 Gene=MSTRG.1075

CAAACATTGCACTTGATTATATAGTATCTACTGTTCTGACCGGTAGAGAGGTTAGGAACATT  
 TTAATGTTCTTAACATAACCACTTTTTGTAATATTATTTGCACGAATTTGACATATACATTTTTT  
 TAAGCATGCGATGACGACTCTCAATCATTTTCGAAGATCTGTCAGAGCTGTCCAATTTTTAC  
 AACCACATAAGAACAATGTTTATAATAATTTTCAGATTATCCTTGCGAAATGAATCGAGTTTT  
 GTGCCAAAACGAATACTTATTGTAGTAAAGTTATCGCGATATTATTTTGAAAAAATACGAG  
 AACCAAAATTGAACGAAGAACAATTCAAACAGAAA

52. >MSTRG.1090.1 Gene=MSTRG.1090

AATCGCGACTTTTTTTAAACATATCACTAACTAATTATAAAAAATTGAATATCGTTTTAAATA  
 TGATCTTTCTTTGAAAATTTTTTTAGACAATTGTATAATTATGAATATATATATATATATAT  
 ACACATTTTTTATATTTAAATTATCCATCTACTTTATTGAAGAAAACAACACTATACGAGTGTAT  
 GCAATTGTTTGCAATTATGAAATAACAGTATAAACTGATTAATCAAGAATCTCTTAACGGA  
 GGAGAACTGCAATGACAAGATAGGCTTACTTACTTGAACTACTAGTCAATGAATCTACT  
 GGTATGAGATATTTATAGCAACTGCTGGCTGAGGAAACGAATAAAACACATTGAAAAATA  
 AAAAGATCATTTATTGCATTTATTTTCAGCATTTTCATATGTACTCAAGATACAAATAGAGAAA  
 AGGAATGTGTACAAAGGAATTTTAAAATTATAAGGTGGAAAATCTATAATTGAAAATTAAG  
 AATTAATAAAACAGAACATATTATCATAATCTTTTTAAAGATTATAATTATTTTGAAAAAT  
 ATTTTTATAGAAAAAGTGATGCATATGTGAACTATCTTTATAATTATAAACTATATAATTTA  
 AGATAAAATAATTTTTACATTGAAGCCTTAATAACTTATTAAATTTTGAATATGTTTTTAATA  
 ATAGTTATATCACAATATTATAATTAGTATGTGATATTTAATAATATATAAAACAAAAAATT  
 TGATATCTAATTCTATCATTCATATATACAAGATCTTATTTTGGATTTTCCACATAAAAGAAC  
 GCTAAAAAATGCTATGAGATGGAATTATTCAAGTTAAGGTGATTACTTATTTAATATGAATA  
 ATAAATAATTATAATT

53. >MSTRG.1129.1 Gene=MSTRG.1129

TTTATAATGTATTTATAATATATCTATGTAAATACTTTATTTAAGATAGTGCATTATATGATT  
 GTATATTAAGTTTTATGAAATTTTAAAAAATTTATAAAGTTAAAAAGAGTTCTGTGTTGTTTA  
 ACATGAGTGATATGTTTAATATATATAAAAGAAATAGAGAAATTCACAGTCTAGTAGGGTA  
 TTCATATATGAAATAGGTGCAGTTGCGTCATGACAGTCGTAAGACATAGAACGGTGAATAA

TGGATGAAAATATTTGGAAACAAACGAAATCACTGGAAATTCCAGAAGAAGCTCTTAGAC  
 AAACACTAGAAAATGAAAAATCCATAACAGAAAAATTATATGCACTAGTAAAACGATCTC  
 CATTTGCTGTAGCTGGTTTAACAGGTTTATCTATTGTATGTGGAATAGGTGTATATAAATGG  
 AAAACAAAAACAGTAAATCCTTCTATATATTTAGTACAGCTAAGAGTTGCAGCTCAGGCTA  
 CAGCACTTAGTATTATTGGTCTAGGAATGATGTATAGTATGTATAATGATTTTATACTGAAG  
 AAAAAAAGGAATGATATTCATGATATTAACAAATAGACACTTAAATTAGAAATTTA  
 ATTAATTTTAAAGAACAAATTACAATATTTATTATTTAATAAAATATCCAAAAACATATAT  
 ATGTAATAAATATCAAAC

54. >MSTRG.1137.4 Gene=MSTRG.1137

GGAAAAAGAATTCGACTGGGATTCAAAAACACAAGGACTAGTTTTAAGTTCTTTTTCTATG  
 GATATATAAGTACTCAATTACTTGGAGGATTGCTTAGCACGCGTATTGGCGGGAAAAAAGT  
 TTTTGGTTTTGGAATTGCAATTACTGCTTTTCTTACAATTATCACACCACCTTTAGTTAAAGT  
 GAGCGTTTACATTTTGCTCGCTTTCGGAATTATAGAAGGAATTTGTGAGGTACATATATCAT  
 AGAAGGTAATAATTTGAATTCAGGGTGTAACATATCCTTGTATACATGCAATATGGGCACA  
 ATGGGCACCTCCATTGGAAAGATCAAAATTAGCAACCATTACATTCTCCGGAAGTTTCTTTG  
 GAACTGTATTTGCCATGCCAGTTGCCGGATTGATGACTGAATATCTTGGTTGGCCTTCTGTTT  
 TTTATGGTTTTGGAGGAGCTGGTCTTATTTGGTTTTTTTATTGGTGGATAGTCATCAAAGATA  
 GACCAGAGGACGATAAATCTATTTCAAAGCTGAACTTGAATATATTAATAAATAGTCTTGG  
 AAATTTGAAAGAAGAAAAAATTAAACATCCATGGAAAGCTATGCTTACATCTCCACCAGTT  
 TGGGCAATTATCGTAGCTCATTTTAGCGAAAATTGGGGTTTCTATACTATGCTTACTCAGTTA  
 CCAACATTTATGAATGATGTACTTGATTTTAAATTGGACAAAACCTGGATTTTATCTGCATTA  
 CCATATTTAGCTATGACTTTCGTCGTTCAATTTTCTGGACATTTAGCAGATTATTTAAGAGTG  
 AAAAAAATTTTAACGACTACACAGGTGCGTAAATTATTCAATTGCGGGGCTTTTTTATTTCA  
 AACTATATTTATGACCTGTACAGGTTTCATTTCAACAACAGCAGGGGTTGTTATTTCTATTAC  
 TATAGCTGTTGGTCTTGGTGGCTTTCATGGTCCGGTTTTGGG

55. >MSTRG.1158.1 Gene=MSTRG.1158

AATTGCCGAGCTTCCGCGTGGTTCCGGCGAGAAATTCCGGACAGGAACATACTACCAATAC  
 TGGCGCTCCCGGGGGTGGCGGGGGCGGGGGTGTATGAAGCCTCGCGGCTCGTGACCAGG  
 CCTCGAAGACCGAACCCTACCGTACAGCCATGGATCCCCGTAGATCATTTGACGCGAAATC  
 CCGCTTCCGCCGCTTATCGTTCCCCACCCCTTCCCCTGGGGGTCATCGGTGGCCTGGCTCTGC  
 CGCGACAAGCCCAGTCTCACGCTCCACGACTTCTTCCCTTTGCTCAGTGTATCGTAATTCTTT  
 CCGGAAGTGGGCGAGGGCGATGCCGAGTTTAACCCCTGCTGTAGATGATACATCTTCGGGG  
 CGAGCATAGATGGAGGTGCACCGAGGCTACCCGGGGCGACAGCCACGCTCGTCATGGTCG  
 TTTCTACGATGGGCGCAGTCCTCGGCTTCTTCCAACCACCTGTCCGCGGCCTTCTGCGATC  
 CCTGTAATTGCTCATCCTCGTACCGTCACCTCGGGGCTGCCTCCTAATCCCTCGTTCACGATC  
 GTATCCAGATTGTCATGGCACAACAATAACAATCGGCCGCGCACACAATCGGCGAGAACCG  
 AGCGTCGAATGAAAGGCAAGAAGAAAAAGAGAGAAAGAAGAGAAAAAGAGAAGAAG  
 AAAAAAAGAAAACACCTTCGAAAAACAAAAAACTTCACTCGAATCAGTCTCCTTTTCGC  
 ACTCGTTTCTTTTTCTTTTTTTTTTTTTTTTACTTCCCTACAACAGGAGGAGACAAGGGAGAG  
 ACGACTCGGTTTTACATCGTTTCACGCGTTTTACTGGCGCGCGGTGTAAATTTGTCGAG  
 CGGCGGACATCCCCCTGGCTGGACGGATCGATGAGGGACGACGAGATCGAACGGCGGAG

ATCGGACGGAGATCGAAGGGGACGGAGCAAAGGTGAACCGAAGCGAGCATGCCGAACGT  
CGCCGGCCAAGTGAGAGGCTAGCGGCACTACCGACCAGCCA

56. >MSTRG.1166.3 Gene=MSTRG.1166

CGTGCGCTATAAAGTATAGGTAAATGTTTATAGTTTATGGTGAATTGACAGTGTTTTGCA  
ATTTGTAGTTTAGTTATCTTTGGATGGCAGTATTTTTAAGTTGCGTAGTGCCAAAGTCACTAC  
AAATATGAGTGGTGCATCACGTAAAGTGAAAAATCCATTATTATCAGCAGCTGGTGAAGGC  
TTTCCGTTTGAAAATTATACTGAAAATGCATTTTTGGTGCCTGTTACGCCTGCGACACCTGCG  
GTACTIONCGGATGTACCCGAGATAGATAAGGTGACTGTATTAGCTGTATCTGGTGCAACATT  
ATCGGGTACAATCAAATCTATTGCTACATTGCTCATCTGTCCAGGATAAATCCATACGCTAT  
AATATAAATAATTAGTAAATAATAAATAGAATATTATCACAAAAAATTGAGGATGGTTG  
AATATTGTATAATCTAAAAGGACTGCTCTTTACTCTGAATGCATATCTAACAGGTAAAACGC  
ATTTGTTTCATCACATCGAATACTATTCTATGTATAGTTCCGGGAATCACAAAGCAAATTGCTA  
TTTCTGTAACTTCAATCAGCATCTTTTCTTCTCGATGATGTTTTTACCGACATGGTTTACCA  
ATTCTTCGGACATTTCTTTATTATTACAGAGTTTCGATCATTCTCATCGATATGTTAATATTTTT  
CTGTATTGGAGTTCTTTTAACGTCGAGGTTTTCAATTACTCCAGTCGAGGGTCTTGTATGAAG  
ATTTTCCTGTTTCTGAATCAACGATATGTTTTATTGTGTGAACATTGTTTTATGATATTTCTAA  
TGTTTTCGATAGGTAAATATTAACTTTTTTAGCGTGAAG

57. >MSTRG.1192.2 Gene=MSTRG.1192

AGCGTCCGTTATCAATCAAATGCTTCGAAAACGTGTTTTGCTGATAGTATTTTCGTTGGCTATA  
GTATAAGTTCATTTAGTCATGTTTTATAAATACTTGATTTTTAATAATTTTTTGCTATATTTA  
TTTAACATTAAGCATATAAATAATTAATACTTTCTTTGATATATAAATGCTGCTTTAAAT  
ATTTAAAAAAATTTTTGCAGGCTATCAATAAAGTGATACAAACTGTTTCACATACTGCA  
AGTCAACCACTTATTGTACAACTATTCCAAGTAGCACTGTTCAAAATTTTCAACCTGATGT  
ATCCAGCACAGTACAAGACACAGTCTTTTCGAGAAAGGAATGCAACATATTTTAATACAGTG  
CCAGCAACTCTGCAAAATTTTTTACCACCTAATTTATCATATAACTTTTATAATATTTCTAAT  
GTTACATATAAAGAA

58. >MSTRG.1195.1 Gene=MSTRG.1195

TGAAGAGTAAGAAAAAATAAATGGCATTACATCGATATTCGTCAACCGAGACGACGC  
AAGATTTATTTGGTTTAGAAATTAGTCAACGATCGTAAAGAGGGAAGGTGTGTGGACGTG  
CTTTTTTCGCGTCATTCAATCAGGGCCAACTTTTAAGTACTTGCTTATCGGAGGTCAAGAAC  
TGAAAGAATGACCCGTGGAAATCAGCGAGAGCTAGCACGTGCCAAAAATATGAAAAAAA  
CTGTTAGAAAATCAGCAGCTGAACAAGAAAGTAATAAGGGTCTTTCATTAGAACAGCGGA  
AAGCACGGGATGCAGAACGAATGAGAGAAAAACAAGTGAAGAAACAACAAGAACAACA  
AGAGAAAGTTAAGCAAGGTGCAAGATAATTCTTTCTATTATAAAACATGTATATTGTTTGAC  
TGAATTCAAAAATAAAATTTTAAGTATGTTTTTACAAATCTTGATTATAAAGCATCAAAGCT  
ATGTTTAATGTGAGTGCATAAAGAATTCATAGTGTTTTTTAATTATAGCAAATGTCTTCAA  
CTGTGTAATGCAGTACACATTACAAAAGTAGGTTCAAATAATCATGTTATAATGTTATATAA  
CAATAATCATGTTTACAAAATATTAATAGCGTGTATAAAAATGTTATCTCTACTCTAATGGT  
TGGAAAAAATACGCATTTGACTGGTTCATCTAGATATAAGAGTATTAATTAATTAATATA  
AGGGTATTTATAGTACTAATTTTTAATTTGTAAATTCAAGAATTGAGTTATTTAATATGATAT



ATAAGCAGCTATTACAAACTATATTATGTAAAAAAGATATGTAAGTACCTTTGTCATTCTCT  
TTGTCTTATAATAAATTGTTCAATTTTA

59. >MSTRG.1195.2 Gene=MSTRG.1195

TATGGCTACCAAGAATTGTCATTTTGAAATGGCATTACATCGATATTCGTCAACCGAGACG  
ACGCAAGATTTATTTTGGTTTAGAAATTAGTCAACGATCGTAAAGAGGGAAGGTGTGTGGA  
CGTGCTTTTTTCGCGTCATTCAATCAGGGCCAACTTTTAAGTACTTGCTTATCGGAGGTCAA  
GAACTGAAAGAATGACCCGTGGAAATCAGCGAGAGCTAGCACGTGCCAAAAATATGAAA  
AAAAGTGTAGAAAATCAGCAGCTGAACAAGAAAGTAATAAGGGTCTTTCATTAGAACAG  
CGGAAAGCACGGGATGCAGAACGAATGAGAGAAAAACAAGTGAAGAAACAACAAGAAC  
AACAAGAGAAAGTTAAGCAAGGTGCAAGATAATTCTTTCTATTATAAAACATGTATATTGT  
TTGACTG

60. >MSTRG.1216.1 Gene=MSTRG.1216

ATTCCTGGCGTGCATCCACGCTACGTTGGCTGCCGCCGTCAGCACCGCCGTCATCATCGTTC  
TCGTTGTGTTGTTGTCGGTGTGATCGCAACAATTTGAAAAAAGGATTATTACAAGACAATCA  
CAAGAAAAAATTCTGTTGTTAATGCGCGCTCGAATAACAGTTTTTCCTTTTAAAGGAATCGC  
GTGACCGATGTTACAATATTTTGCAGCAAGTCCAAAAAGAGATATTTTTTTAAATTGATAAG  
TTATTGTTCAATAGTTCAGTGTTCCTGTTCCCTTATTATTGTTATTTTTATAGTGAGCCCATT  
GTTTTCTGTGATAATTGTTCCCTGAATTTGACTTGATCGTGGGATCGGTGTTTCAATTCTTCAA  
ATTACTGTTAAATCTCGGATTTCTCTAAAGACGATTTCCCTGGACTATTGTCACGTGACAAA  
TGTGAAGAAGAAACGTCATCGCATGGCCAGCCCAAGGTATGTATCACAATTCTCTTTAATT  
CTAAAATTTTTCTGGATACTACTGGAAGAAAATAAGGAAGAAATGGTCAAAAACAGCAGT  
ATTGGTGAGTAAAATTTCCATTAATGAATTCTGAAAGCATCGTGCAGCGATGTCGTCAGAC  
GCTTCTTCGTTTTCTCGTTTTTATTTTCTTTTTGTTGGGATCCCACGACGGTCTGCTGTAGATG  
GTGACTAGTCGTTGAGGAAATGGACAAAAAATTTTAATTTCTTCAGCATGTGCGTTGGAG  
GTGACGGATCAGAGCGATAAATGTTCTTCTCGTTATTCTCGTCAGCTTTTAGATTCATGTACA  
TGCCCCAAAAGCAAAAAGCATTGATTCTCTGAAACTCTATCTCCA

61. >MSTRG.1243.1 Gene=MSTRG.1243

TGAAAAAAGAACAGTTTGACAAGTGTAGAGTTTAGGGTTAGTAAAAATGGAGCATTATACG  
ATACAACAACGTGAAATGGATTATTAATCATCAAAAAGTGGATGCTGGTTTTTCGAGCAA  
ATAATCCTAAGCATATTTTTACCTCGATGGTTTTGTTAATCGCCAAAATTGCCGTGTTTGAGG  
TTCGGAGAACCCACGTGTGATTAGCGAAAAACAAATACACAACGTATCACTGTTTGGTGAG  
GATTTTGGGCAAAGGCATTATTGGACCATACTTTTTTGAGAATGAGGTTGATCAAGCAGC  
AACTGTTAATCGCGTATTCGATATCGCGACATGATAACACAGTTCTTTCTGCCGAAATTGGA  
TGATATTGGTGTGGCCAATATGTGATTCAACAAGATAATGCCATATGCCATACAGCCAAT  
AAAACAATTCAATTACTGCATGAGACATTTCTGTCGTGATTCTCTCATTTTCGGTGATCA  
GAATTGGCTTCCTAGATCATGTGATTAAACATCATTAGATTTCTTCTTATGGGTTCTTCTTATT  
ATAAGTCAAAGGTCTATGTTAACAATCCCACAACCACATGTGCATTATAAGAGGAAATTAA  
ACGCTGCATCAACGAAATTCAGCCACAATTATGCAGAAAAATGTCATGAAAAATTTTCGAC  
GAAAGGCTGCAAACGATCAGCATATTAATATTAGTAACGTTCTGCAATTCAACGCATAAGC  
ATTCAAATCTTGGTGCTGTAAACCAAGTAAAAGTGATCCGCACATGCATATGCACATTGA

TAGCTAAGGAAAGATTGATATCTGATGGCAAATACGAGTGTGTAATTAAGTTGAAATGGAT  
ATTCTGCATCGCAGGAAAGAGAAGTTGATATGAATACAGATCCAATCGTAAATGCCAAAG  
CGGTCAAATACATACACGTTATATTACATCCCCAAACAGTTTTAAATTTTCGCAATATATTTT  
TGGAAAATTTCTATTTTCATATTCTTGCCTTTCTTTTATGCAGATTTTCATCTCTTTGATTATAT  
ACTGCACAATCTCCAATTCAAATATTAATTTTTTACACCATATTTTTTTATAAACGCACATCG  
ATCAAGTTTCTATTTGAGAGAGAATTATTTATAGAAGATAATACTTTACAAAGCATATGACA  
GTTTGAATAATATTTTGAGCCACATCTATAAAACGATGATAGTTCTTAAAAATACGACATTG  
TCCGTGTGAAATAAATTGAATATGACGAAAGAAGAAGCAGCATGCAAGCGCTAACAATAC  
TAATTATCTGTAACATTTTGAAAATGAACACTTGAGTTTTGCCACTATTGACAGAAAGCGGC  
CAACACAAAGCTACGCTCAACCAAGTAATATGGATAGTTTTCTCAGGTATCATTCTTTTAC  
CATATTTTCGAGGAAATACTACAACAACAAAATTGATTGATGAATCAATCGAAATAAAATT  
TAACCGATACAATAAAACGAAATATGTATTCTTCGATTGTATAGTTACATCACTTCGAAAA  
CGAGT

62. >MSTRG.1271.1 Gene=MSTRG.1271

TTCAAATAAAAGTTGAATGGTTTCGAAAGGGCTATAATCTGACGTTCTCATTTTTTTTAGTAG  
GTTGACCAATAAACAGCTTTTCAAGCACAACTCTATTTTTTTGACTGATAACATGTATTTTT  
AGAGCACCAATCGATGGAGCATAAAATTTCTATAAAAAAGTATTAACACACTTATATCGA  
AAAACCAATAGTTTAAGAGATATAGCAAAAATTAATAATTTTTAGGAGGTCGACCTCCTGT  
CATATCATGTTCTCCTAATACAAAATCGAGTTTTCGGACAGAAATTTTTCTTCGATCGCCGG  
AATTTGGACATTAATACTTTTTGTTGAATATCTCGCTTATTATTCAGAATATTAATAAAATGTT  
TCAAATAAAAGTTGAATGGTTTCGAAAGGGCTATAATCTGACGTTCTCATTTTTTTAGTAGG  
TTGACCAATAAAGAGCTTTTCAAGCACAACTCTATTTTTTTGACTGATAACATGTATTTTTTA  
GAGCACCAATCGATGGAGCATAAA

63. >MSTRG.1313.1 Gene=MSTRG.1313

GGCGACCGAAGAAAAATTTTTGTCCAAAAAGTCGATTTTGTATTAGGAGAACATGATATGA  
CAGGAGGTCGACCTCTACAAATTTTTAATTTTTGCTATATCTTTTAACTATTGGTTTTTCG  
GTATAAGTGTGTTAATACTTTTTTATGGGAAATTTTATGCTCTATCGACTGGTGCTATAAAAA  
ACACATGTTATCAGTAAAAAAACAAATTTGTGCTAAAAAAGCTCCTTATTGGTGAACCTAC  
TAAAAAACTGAGAGCGCCATAATATAGCCCTTTGGAAACCAATCACTTTTATTTGAAACA  
TTTTTTAATATTCTGAATAATAAGCGAGATATTAAAGAAAAAGTATAAACGTCGAAATTTT  
GGCGACCGAAGAAAAATTTTTGTCCAAAAAGTCGATTTTGTATTAGGAGAACATGATATGA  
CAGG

64. >MSTRG.1325.2 Gene=MSTRG.1325

TTTTGTTATTCGCCATTAGTTTTGTGGTTTATAGTTCTAAGTGATCTATTCTCAATATTTCTCA  
ATATTTGTTACATTTTTTAATATTTTTTACATTATTCTTAATATTCTCACGTAATTAATATTAA  
AGAATATAGTAAAAGTATAATATTTAATAACAATCGTGCTAATATATACTATAATGGAGAA  
GAAAATTATTGACCAAAAAGAATATTTGAAAAAGTATTTGTCTTCAGGAGATGGCGATGAT  
AAGAAAAAAAAGAAGAAGAAAAAGATGAAATTGGGAGCAAAAACGTTATAGTAGTTGTT  
TTACACATTTTCTGGAATATTTAAATTGAAACATTTTGAATATTTATATAATTTAAAAAA  
TTTCTTATATGATAAATAGTAAAAAGAAAATGTATTTTATTCATTACCATTTCCTTAATATAT

TATTATATTAATATGGACGATATATTTAATGCAAAAAGGAATTTCAATTTTGGTTTTCAAAT  
CGATATAAAATATTTTTAAAAATTATATTTATTTCTTTGCACAAATTTTGAGATGTGTTTTGC  
AGAGTAAAAATCATTGATGATGACATAGACTTGAAGAACATAAGACCAATCGAAGAGAAT  
GAATTTGATATTTTCATCAATGCCGAAGATGCACCTCAAATAGCCGGTGTAGTGGATGAAC  
ATGGACCAGTTGATTTTAGTGATAAAAGAAGATGGAAAATTATAGCTAATGATGAAAGTGG  
TGATTTAACAATCACTAGTGTAGCAAAAGAAAATAAACAATCTAAACAAGTTAAGAAAAT  
TTCTGATGATGATTTAAGCCCATCAAAGATACAACAGAAATATTCAAATGATGATTTATCTC  
CTCCAAGAATATCAAAAAGATCTAAAGATGAGAGAAATAAGAAAGTACAAAAGGATGAA  
GATAGTGATCTGAGTCCACCTAGAATAAAATCTAGAAGTCATATTAATTCTAAATGTGAAT  
CTCCGCAAAGTAATAGTGATGATGATAGCAGTCAAGAAATAGATGTTCCATCTTATAAAAT  
TAAAAAAAAGACAAAAAGAAAAGAGAAAATATCAGATGATTCTGATCTTAGTCCACCTAG  
AAAAATTAAAAATTATAATTCAGATATAAATTCACCAAGAAAGAATAAAAAATATAAACT  
TGAGAAAAATATAATACATAAAAATGATTCAGAAATGAGTTCTCTTAGGAAAAAAGAGA  
TTCTAATTCAGATGTGAGTCCTAGAAAAAATAAGAATGATTCTGATTCAGATATGAGTCTTC  
CTAGGAAGAATAGAAAAGATTCTGATTCAGATTTAAGTCCACCAAGAAAAAGTAAAAAGC  
ATAAGCATAGAACAAAAGATAATTTTGAATTTAATACATCTAAAAGAAAATATGAAAGTA  
ATGAAAACATTTACATGAATGATAAAAATAAAAATAGAAATTATGACTCAAAATGGCATA  
GATACAGAGATGAAAAAATAGAAAGAAATAGAATGTATAAACATTCTTATAAAAAATTTTA  
AATCAGATAAGGGATATTATGATTCAAATATGAGTCCACCTCAAAAAAGAAACAGAGACA  
GTACAAGTCCGAATAGATTTAGAAGAAATGATAGAG

65. >MSTRG.1333.1 Gene=MSTRG.1333

GAAGATGGCGCTGATTACAGTATTTTTACTCTATCTCTATCCTTTACTTATTATTGCTCTCCT  
TGTTTTCTTCAAAGTAGTGCAGTCATTTCTAAACTCGTTCGTTTTAAATAGTGAAGTTTTATT  
ATTTGACAATTCCTCAACCGGATAGGATGCAGTCTGATCCTTCATAAGTTTTACTACCCGAA  
GCCAATTTTATCGGTTGGATCAAGTTAGTGAACGAGATATCTTGATTCACACGGATCAAAG  
CAATGTCGTTAACGAGACTGAGCGCGTTGAAACTGCGATGGGCAACAACTTTCTCCGGTAC  
ATAAGACACTCCACCTGAGTTCAGTTGATTGTTCCAGCTTGAACAGTGATGCCATTCAAAT  
TACTCAATCTGTAGAACAAATGTGTTTCATTGATTTATCAGCATTTATCAGCGAGAGAGAGA  
CTCTAATTTCAATTCAGTTAAGTAAAATTCTATTTAAGGATAATAATAAATT

66. >MSTRG.1338.4 Gene=MSTRG.1338

CGCCGCGCGTCGTGTCTAGCTGGCGACGTTGGGCGTCCTGCCCCAAAGCGTCGGGTGGGG  
AGCCGTGGTGAACGCAGTTCTCGACGGGTCGCCGAGAAGGTGTAACGGTGTGTCTTGCC  
AGGCTGCGAGCTGCGGCCACCCGTGCGAAAAGCCACGTGATCCATCCTGTTGGACCGGCTT  
CCTCGGCTATCTTTCTTTCTGTCCTGTTATTTCTGTTTCTTTTCGGATCGCGTCGCGTGTGCGTC  
GATGCTCGATGTGATCGCGGCGAGCCGATAATTGAAAGAAAAATTGAAAATCGTGAATC  
GCGAGGAAAGCATGGTTGATCGTTGACCATTGTTGTTGTCCTCTTACCATTGATTTCTGTTGA  
ACAGCTATGATTCACGAGTTCTACGGTTTAGTTTGTCCCGTTTGTTCGTTTCTTTTGTCC  
TTTCGTGAATCATACGAGTGGTGGTTTTGTTGCATGAGAAGGATCGCGCGAGTATCAAGGC  
CGCGCGTGTGTGAGAGTTGGAGAGTTGTGCGGTTGTTGCGCGGTTGCCCTTCTGGGATACGT  
GTTTCCGTTCCGCCATCGTGTTGCCACGCGGACTTGGACATGTAAACGCATTCGAACGGACA  
CGTGATTTCTTGTGTGATACAACCTCGTGTGGACCGCGTCGTGCAGTGTTTTAAGGGTGTTTTT

TTTAAGGTGCCGCTAATGAAGGGATAAGAATGCGAGCGGTGGTCGAGGGGTAGAGGAGG  
 AGGGTGCCAGGGATTTTTCTGTGCCGAGGAGCGGTTTGGATAAGGCATGCTATGCGTCAGA  
 AGACTGGAACAGATGTTCTCGCGAAAGATGACAGGGTTAAGTAGATAAAAGGAGCAGCT  
 GCTGGTTCCAACGACGATTCATCGCGTTTTCCATGCAGTGCACAATGCTCTGCCATCGCGCC  
 CTTGTCGTTCTCTTTGCTGTCAACGTGCCAATCGGATGATCAGAATTACCCCATCCTCGACT  
 AAAAAACTCCATCCCAGAAAGACGAAGAAAAAAATACAACCCCTCTCTTCTTCTTCGAGA  
 ATAAAGAAAAAAGGGGAACGGATGCGAACACGCCGCGGATGGAAGCACACTCCCTCCC  
 TCTCCCCCTCCCAAATTCCGCTCGAAGTCAATCATCAAACAGTTCTCTTCGGGGTAAACTCG  
 GGAATTGGGGCGCAATCGGTGCGCGCAAAAGCAGTTAGAGCCCGCTAATTTGCGCCGAGGC  
 CTCCCCGCCGAATTGGATATCAATTCGTATATCGCGCCGATTGCGGGATTGCGATCGACAC  
 AGTTCGGGTTTGTACAGCGAAATCAAACCTCCCTCCTCCTCCTCCACCGTCACCGCG  
 ACGTCCGATGCAGATGCAAGGGAGGGGGGCGGGAGGAAGAGAGAAGGGCGCGGAGAA  
 ACGAGATTGGAACCTGTGCCAAACACGCGGGGAAGGTTTGGATGAATTCCGGATATGC  
 GCCGGGATCCGGAACCGACATCCACGAGCGCCAACGAGAGGAGGACGAACCCGGTCAA  
 CTTCTGCCGTTGATGTTTATTCGCCGAGAGCAACGGGGGTACGGCGACTGGGCTTGTCTTC  
 GTCGCGAATTAATTCACCGTTTCCGGGTCCCGAACCTTTACGGCTCTTCGACGAGATTGAG  
 GCTCGTCGTACGCCCTTCGATTCCACCCTTCGGAATTCTAGCAGGAATCCGGCTGGATCGGA  
 ATTCTCCTCCTAAAAAATAAATTGGTAAATCCTTGTCTTCTGTATCCATGGTTTTCTAGATT  
 TAGGAATCGTACGATTTTAATATTTAATATTTAAGGACGAGGGATAATTGGTTTATTTGATTT  
 AAAATGTTTCGAGAGTG

67. >MSTRG.1340.1 Gene=MSTRG.1340

AGATCCAAAAGAACGGAATTAATCGAAGATGGAaaaaattCGAACTTTTAACGTTCTCCTC  
 GATAAAAAATCAATGGAaaaaAGGAACACCGCTAAAACTAAAGACCCGGAGAGGAATA  
 CCAAAATTAAAAAAGGCTCGTTTCGAGGCGAGTCACGAACGGGCCGGATGGAGGGGCAGT  
 TCGAAGTGGACGATGGAaaaaAGGGTCGGCTCGTTAATCCAGATCGGCGAGGAAACGCCCG  
 AAGGGACGGAGAAAGAGGCGTTGGAAGGGTGAGTGAAGAAAAATTGGACGGAT

68. >MSTRG.1343.2 Gene=MSTRG.1343

AGAAGCTCGATTCCAGCTCAGTATTAATCGAGTCGTCCGATAGTACGACAGGTTTAAAGTG  
 TTGTAATCATAACATTGACACGTTGAACAGTACGGATTGTTTGTTTAATCAAATTGATTGGA  
 TTCGCACGTGGAaaaaATCGTTAATAATCGATTTTTTATTCTACTATTATCTAAACTACCGATC  
 AATGATGTAATCGAGTAAAGCGATAGCCGAGAAGGATAGAGACGAAATCATTTCGACAGACC  
 TTGAATACGCCGAATACAACGAAAAAGAAAGGTTATATTTCCATTAATTTTTACGAATATG  
 TGTGACAAAGTTGATATTGAAGCAAATGTTACTGGTGGGGGGTCTTCTGGACAAGCTGGTG  
 TTATACGATTAGGTATTTCAATTAGGGCTTCGAAGCTTTGTCGATAATGACATGATAGAAAGA  
 ATGAAACTTGCTGGCCTTCTAACGAATGACTGGAGGAGGCGTGAAAGAAAGAAGTGGGGT  
 CAGGAAGGAGCTCGTGCAAAATTTACATGGAAGAAACGTTAATTTTTTTTTTTAATTTCTG  
 CATTTAAATTTCTATATTAATTTGAATAAATTATATAAAATTTATTAACATTTTGAAATAA  
 AATGCATGTTATTATAAAATTCTGTAGAAAAAATGCAACA

69. >MSTRG.1385.1 Gene=MSTRG.1385

ATATATAAAATTCATTATACATATTTATTATAACACAGTTCATACGTTGATGAAAAAACACG  
 TGGTAAAGAGTGTAATTATTAATTTAAAGCAAAATAAGAACATAATCAGAATGCCTCTTG  
 CTAAGGATTTTCTTCATCCAAGTCCAGCTGAAGAAAAAAGAAAACACAAGCTAAAAAGGC  
 TTGTACAGAAGCCAAATAGCTATTTTATGGATGTGAAATGCCCTGGGTGTTATGCTATCAAA  
 ACTATTTTTTTCACATGCACAGAGATCAGTAGAATGTGATGGATGTGCGACAATATTGTGTAC  
 ATCTACAGGTGGTAAAGCTCGATTGACAGAAGGTTGTTTCATTTAGAAGAAAAGTTCAATGC  
 TAATATAATGATGGTTAAGACAACATAATGTATACATTTCTCTTTATATTCAATAAATAAAC  
 AGAATTATTACTTAA

70. >MSTRG.1408.1 Gene=MSTRG.1408

CCAACGGACGAGCGAGCAGCGACGGCAGGGACTGCGATTGAAAGTATCCACGCGATCTT  
 CGCGAAAATAAAGAGTACAGATACAGGCATACACCTGAGATTAAAACAGGTGAAGAATC  
 ACATCGTGACAAAACATCTATTTAAACAGTAGTTACCAACCGTTTTGCGATAGCAAATCAA  
 TCGCCGGTGTAACACGTTGGTTTGTACGGTCCACTCGAACGAAGCGCTCGTTTCTCGTTCCG  
 TTCGTTCCGTTACGATCGTGTGCGCCGAGTGCTTACGGTGTTCTGCTCGCGTGTTTTTCATT  
 TCAGAGAGGGAGAGTGACAGCGAAAAGAGTGGTGGAAAGAAAACAAAACACTGTTGACAGT  
 GATTAAACGTGACTACTGCAAAACATCCTTAAAGGATATCTGTGCTGTGTGACATTCTTCTC  
 GTTCGAAATATCAGGAAAACGAGAATTCGATTGCTCACAAGGACGAGTTGCAGGGAAGGA  
 ACAGTGTAGTTTATTCATTAAACCACTAGGGTGCGTGTTTCGTATGTGTGATTGGAATCAGT  
 ACCGGTACAACGGCATTACGTGAGACATTGAAAATCGAATTTGTGCTTCGAAAAGTGTTCCG  
 TTGTTGGTTAAAAAGTTCATCGCGACTATTTTTATTTCGTGGTTCGGATTGTGTTATAGTGTCTG  
 TTCGTGGTTCGATTTAAATCCGTTACATTTTTTCGAAGTACATCGATGAATCATCGATATTTCCG  
 AACTGAAGCTGGTTCAAATCACTTGCAAATCGTTCATTCTATGAGGTTAAGTGTAGAAGGA  
 ATATCAAAGTTACAAACAATAACAGTACAATTTGCCTAAAGTAAGTTATAGAATCAAATTC  
 TAAGAATATACGAGAAGAAATATACAAAAGATATATACAAAACATTCCAAGGAACGAA  
 GAGACGCCATTAGTCTAACAGACCTGAGGCTATTGTAGCCATTATCTTGTAAACGTACGACA  
 TATTTGAAAAATTGAAATCTTGTTTCGCGCGCAAACGGAATATCATATTGGCTGCTTTCGAA  
 AAAAGTGATTTGTTCAAATATCTTTTTGATCAACTACGAGAAATAGACCAACGTTTATTCC  
 AATATATCGATAAAAGAAATAATAAAATTTCTGGTATATGAAAGAAAATACGTTTGAAAG  
 AAAATTCAATTGTATATTATTCCTGTGGAACGATCGAAAGAAACAATAAAGACTGATT  
 TGTGATTGAACTGTGATTGAAGCTTTTCTTCACTGTTTTTACGAAAATTCAAAGAATTATCA  
 TCTTAAGATATATTCCGAGTGTCAATATTTCCGCATAACGTTACAATCTCGACACTGAATTC  
 AATGGTGGCGCAGTATTGAGGAACTAAAGTTGCTTTTAGCAACTGAAATTCAACTTCAAT  
 GTTCTTCGTGTGCTGTCTACTAATTCGACATCGTGTTTCGTGACATTATATTCCGCGTGTGTGCT  
 ACAAAGGTGCTCGTGGACGAATGATTTATCGTACTATCACGTGAAAAAATATATTTCGTGTG  
 TGCAAAGAAAGCTTTTTTTCCAGTTGGATTACAACGAAGCAACGACATTGTGTTCACTTCGT  
 AGGAGTGGAAGGATTTGTGCGGACCTCGTGAATTTGGAATTCGTGCTGTCGATCGAGACAA  
 CAGACAGCGCGTGGCCAATTACTCGCATCGTTACAAGCATCAATTGATTAATTAACACCTT  
 AATTAATTCGTTTCGATCGGTTTTAACTCTTCGACACCGTTGCTGCTCTCGTGTCTACACTTTA  
 ACGTTTTTCGTCCGTTTTTACGAATTTATCAAGATCGTATCGCGATTAATAGTAATCGGAATTT  
 TTCTCATTTTACACGCCAACGTCGGAAAATTGATTACACGCGGTTCAACTTCGTGGCGATTA  
 ATTCCAGTTTTGATTGTCAACGTTTTCTCGAGTTTCGATTTTCATCGTATAGGCAGGATCTATT  
 CTACATAGATCCTTTGTCCGATTAAACCGGGATTACGTGCTAGTTCGTGGAGGCAATCGGTC

71. >MSTRG.1412.1 Gene=MSTRG.1412

72. >MSTRG.1427.2 Gene=MSTRG.1427

38

TCTAATATTGTGTAGAGTGCTACGTGACAATTTTTTTTCGTTTATATTATTAATATTTTATTTTC  
ATAAATTTCAATGATCATCTATTACATTGAGCATGGTAGAAGATAAAAGATATGAAATTGA  
CAGTCGAATTGAGTGTGATGGACATCAAGGTACATTAAAGTACATTGGTCCTGTTGGTGAA  
ACTAAAGGTTTGTGGCTTGGTATAGATTGGGATGATCCAACCTCGTGGAACATAATGGTA  
CATATGAAGGAATAAAATATTTTAAAGCTAGATATCCTACATCAGGTTCAATTTATACGTCCT  
GGTAAAGCAAGATTTGGAATTTCTTGTCTGAAGCTATTAAAATTCGTTATGGTTTCATCAA  
TGATGAATTAGCTGGTATTGATAGAGATACATTAATAAGTTTACAAAAAGAAATTAATGCT  
CCTTTTTTGGAAGTTGTTGGTTTTCTAAAGTAAATAAAAAACAAAGCAAATTTGATCAATT  
AAAAATAATATGGTTAAGAGAACAATGTGTTAGCACTGCGGGTGATTCTGGTGAATTA AAA  
GAATTAT

73. >MSTRG.1435.2 Gene=MSTRG.1435

ATGTTGTAAATAAATATTGACAATTACAATTCTGATTGTTCTGCTTCAATTATAATTGATGAA  
ATTGTAGAAGAAATGTCTTCCTTTAACTCTAACTTTTACTAATATTATTAGTTGATAAATTAT  
TGTGCAAGAGGGCCAGGGTGAAAAGTAGGATAAAATGCAGTATCAATTTTTTCCCCTTT  
TTTTATTTTTTATCACTAAATGAGTTAATCCCATTTTCCAGTCGAACTTGGCCTGTGTAATCTC  
ATCGAGATTATTGTGAGGGATCATTGTGTTAAGTGATTGCGAACTGATATCACGTAGGTTAAT  
CGTACTAATTTACTAGAATTGATTGTTATCGAGAAAAGTATAAAAAGTGGAGTATTAGTGTG  
ATCGATTTGCGTTTTTGTAAAGACTGAGAGAGGAAGAAATATTTTGAATTTTCGAGTTTTTGAG  
AGAAGAGTGACAGATGCAAGAAATAGATTATATTCGAAAAATGGAAAAATATTGCAACTA  
TTGATCCCTGCAAATTTAGATTACAATTATCATATTGAATAAATGTAAGAATTAGAAATAGT  
ATATAATATATTCAAAAACTAAAGATAGATAGTCATTTATAAGAAAAGAACGAATTTATTG  
AACAGATAAGAACAAAAAATAAATGAAATTTTGCTTAAAAGTCTAAAGTATCGATAATTT  
AAAATAGAAAGTCATTCTAGAAGAAATAACTAAAATAACTAAATAACTCATCTAAGAAAT  
AACTAAACATGCTCAAAAAAATAAGTGGCCTATTTATAAACACGAATCGAACTTTCCAAT  
ATGAAACAGTACAAATTAATAATTTTATAAATAAAGAAATTACCAAATAGGAATCCT  
TGCTCTATCACATCCGATTCTTTTCTCTTTTCTCCCCTGTACCCTTTACACATTCCAAAACGC  
TACTCTTGCAACCCATTCTCGAACCAGCTTCTCACTTCGATGCGCAATCTTTTCCCCTTGAAC  
ATATCGTCCAACTTCATCAACTGGATTCTAGAAATAAAAAGATGAAAGAGAGAAATGAAA  
AATAATTCCTGTTATCGTTGAAGTTTCTCAATTTTTTTTTTAAAACAAAAATATAGAAAAAA  
TAAATAATTGTTCAAATTAATGGTCCAAGGGAATAATAATTTATGAAAAATGCCACGAGA  
TTATTTTTTCAAATGCCAGATAATAGATTTGTGACAATGGAAAATGTGATGCATAATCGATT  
CGATGATGAGAATTTTCGGCTTGTTTCGAGATGTGTAAAGAGATTGAAAGGGTGTCTGTCGTG  
GAACGATGCATAAACTCGATATCAGGAAGTATTGAAAGAGAGAGAGAGAGAGAGAGGGAGT  
GGAGAATGGTTAAGGCAAGAGATAATGAATATTCGTGTGACGTTGTCATTTCGACATTGAAA  
ATCGCATTTTTTAAACGAGGCTTACCATCGAGACAAGATGAATGTTTTGCATACATGTATCT  
TGAAGAGTGCATGATCATTGGAAAGATTCTTGCATGGATCGAGCACTTGGAAAATTGTTCA  
ACACTGTTTCGATTACACTGATTACACTCAACATTTTATTGGATACACAAGTTCTTTCTTGATC  
TTAAAATTCTCTTCAAAAACTGTCGCTAAAGTTTCTTCTCAATTGTTGAAAATTTTGAACGTA  
TCATCAGTTTTTCCAAGAAAACCTGCGTTCACTTCCTTTTTATGATGGCTTTCCTCTCTCTAT  
GATAAAGAGAAATAAGATCCAGAGAAAAAGAGTCAGTAGATATAGAGCTTAATAGATTTT  
TAGAAGATATTGCTATAGATTCTTTTTTAAATATAATTATAATTTAATTCAAAATATATAA  
TTTAAAAAGGAGAAAAAATAAAGAAGTTAGTAAATCTTTATTAATAATTACGTGTGTGA

TATGTTAGAGTATGTTTCATAAAAAATTAATAATATAGACAATATAGATTAAAAAGTATGAA  
AAGTATTAAGTAGTAACGAGCTAATAAAATTAACACAATAATATAAATATTTTAAGAAAAT  
TGCTTATAGATTATTAGATACAAAAATATATTTTGGAGAAATGAAAATTTTCTATCTAAAAA  
ATCATCTTAATAGAAAGAACAATAACGTCAGAATCAATAGAATAAGATAAAAACAAATTAA  
TTCAAGTCTAAATAATAAAACAAATAAAAAAATAATCTAGCATCTCCTTGTATATCTCTGTAA  
TCAATTCTAACTAGATTCAAAATCAAATCCGTGTTCTGTAAACATGCACAGCCACTACAGTTC  
CCCGAACAAAATCATAAACCAGTTATCGTCACAGATACGCAACAATTTATGATATTTTTCA  
AGATAATGTTCTCTCCTAGTTTCATTCAAATTTTAACTATAATATATCATCAACCTCTTGT  
TTAAATTCTTTCCAACCAAAACATACGTGATTAAACAAAGATTAATCGACAACAAGATTAT  
TAGAAAATTGAGCCAAGAAAAATTATTTTGCCAATTATTGACCAATCAACGTAAGAAACAT  
ATACATTATATCTTGTACGTACGCACAAATACTAGTAGCACGCACCGATCGTTGTTATTTGC  
TTAAATTAAATCAAAGTTAACCCCTCCCCAATTATTCACGGAGCACAGAAGAAACGGAAG  
AAAATTTATTTTTCCACCAGATAAACGAAATCAATCTTGACACTGAATCATGCGACACTG  
AAGGCCAAGCTTTCAAATCACACTGGTACACGCTTCTGTCTCCCGATTAATTCTCCGCTTTA  
TCTTATCACACCAGCCTCACCAACAACATCGATTCAATTCCAAAGATTCCTACATCCGAAA  
AATCACAATCGAACGATTTCGCAATTTTACAAAACCTCCGCCCGATTCCCGATCTCTTCCTCGA  
TCAACGTGACGTGATAAAAAACGTGTGTTACATTTGAGAGAGAGAGAGAGAGAGAGAGAGAG  
AGAGATAACGATAGAGTCGAGAAGAACTTCGAGAAGAAAACGTGTTTGAATGATCGATCG  
GTTTGGACGTGGACCAAAGAAATCGTCGGATGATGTTCGATCGCTGGCTCGATTCTGATCGA  
GATCCCGTTTCAACGTCTGGCTCTCGATGCCTCCCGAGAAAGATTTACGGGCCAGAGGTCGCC  
CGCTTCCTTCTCCGCTATTTGACTTTTATCATTGTCTGCTAGTTTTCACTTGGAATAATTTAA  
GTCGCAACGGTTTGGATTTTCGAGATGGAATTCAGGATCGATAAATCGGTGTAATGATCACT  
GGTGCCTAAATCCATCGAAATTGATAGGAAATGTTGCTGAGTTTTTGGCAAAATTGTGTAA  
AACGTGATTTTATGTAACGGAGTAATTTTATTACGATGAATGATTTAAAGAATAAATATGGA  
TATGTAGAAGTTGTAGAGGAAAATATTTGTTTAAAAGTCGAAGAAAATTTGCCAGATCGAA  
AGTAAAATAATCTATAAAAATTCATTGATTCATCTCTGATTGAAATTTGAGAAAGATTTTG  
TTCTGATTGAAATTAATAAATTAAGATGACAAATCTTTGAAAATTCGATATAAAGCTTATTCA  
AATTTGAATCATTGTTGAGATTTTAAAAACTAGATTCTTAAATCACAAATTACTCCCATAAT  
AATTTAAAATTCGAAGCACAGTTTTTAAAAAATTAATAATTATAAACAATAATTCTTCCAAA  
ATTATACATGAACTTATCTGAATATACTTGAATCATGGATGCAGAATTTTAAATATTGTTT  
AATTCAGATGTTTAAATTGAAAAACAACAAATATGAATGCATACAAAGACTATCATACTAA  
TCAAAGTAAATTTTCAAACCTGATATCAACAGTTTATAAACAAAAACAATTCTTTAAAAAT  
TCCATAAAATAATCACTAAATCGTTAAAAAAAATTCACATCTCGAAACAATCAAAATTAGA  
GAAACAATTTTTCCAAAAGTCCTCGTACAATTTACACTCGATTACTTCATTCCGTGCACACG  
ATAAAATAATTCGACGTAACGATTGACCGACCACGGGATCACAATTTTCATCGACGATCCTC  
GAGTCGATCGATCGAGGATCCATTGTTAGGCAACGCGATATCCCGAGATGTGCGCCACGTT  
TTAATAAAGCTAGACCCAGTTGCAGAAGACGTTGTGGCCTCGAATCCACTGGTTAAAAGTT  
TTCGATACGAGAAGGGGGATCGGGTGATGCTTGAACCCCTCTTTTTCTCGATCGTCTAGCCA  
AATATTTTGTGTTGCTGTTTGAATTGCGTCGATGGGGGGATTTCGTTATTCGGGCATTACGTGA  
TGCGTGATTTATTAGAGAGTTTTGATAAGAGAAGAAAAATTTTTTGGCAAATATATCCTCCG  
GATAAAAAGAATCTGTTAATGATAATTCAGAAAATATTGCACCTAAGATTGTATCATTGTAT  
ATTGGATTACATTGTACGTTGAGTTTAGATGGTAGATTATCATAGTACATGTTGAAAAGTCA  
CACATAGAAATATCATATAGCAATATCACACCAGTATGGAATATATGCAAATGCAAGAGA



AATGAAGGCCTCCTAAAACCTTCTGACCGATTGAAGTAAGAATACTTTTTATTGATGTTGATC  
GAACAAATTTTACTTTACCTTTATTTAAAAGAAAATCTAAAGCACGTTGTTTATCTTTTGTAT  
CCCCCTAAAAGAAATAAATCACGTAATCTTAGCCAGGGATCCTAGCCAGCATTGTGAGC  
AGGTGAGATAGATGATTTGGCTAGTGCAGACCTATCTACTTTTATAAATTATTAGTATACAG  
TAATAAAGAAGGAAAATTATTAGTATTTGATCCCTTCAAATCGAATAAAATCCTATCCAGC  
TGGCCAGTATTATGAGTATACATATAAAAAGTTTCTTTTGGTAGCTTGAAAATTAATATAAG  
TATATGTTTTTTTAAAAAATATATATGTAGGCTAGTAGAATTAATTAATGAAATAGATCTT  
AAAAATGAGCCTTTTAGTGAAATTATTTGAAAGCCAAATATCTATTTAACTAATAATGGGA  
ATATTGAATAAGTAAATAGTGAAAATTCACAGGTTTATTAATAAGATTCATTGCGATGATGT  
TTCAGTAACTAATGTAAGTTCTTTAACTGAGCAATGTTTTTTAAATTTTTTTACAACTGTTT  
ATAAAAAAGTGTTTTTAAAATATAAATGGAAATATCTGAAATAAGATGATGAAGAAAGAAA  
AACTTTTTGTATGATAAATATTTAAAAGAAAAGGGGAAAAAAAAGAATAATAAAATTAATA  
TTATACTTCATAGTATTCAATAATTCAATAATTTGATCGTGTTTGTCTAATTGAGAAAATAGA  
ATGGAATGTTTATGATAGCAAAACAATAATATAGATAGAATAATGATAGAAATAGTAGCA  
TAAGACAATGTGAATACGTTTCGCAATTCGATACTGAACAACACGTTATGAAACATTCAATG  
GAATCTCCTTGAAGGTATTATTGATTTGAAAGGCTAATACTGCACACTGTTTGAATGGCGA  
ATAGCAATTGCACATCACGGTCTGGTTAGTTTAGCTTGCAGAAGCTACAAAAAATCCTAA  
ATGCAAAACGTATTCGATTATAAATATTTAAACACGAAGAGAAAAAGGAAAGTTGATACG  
ATCTTTTTAACTTAAAATTTCTTGAACTTAAAATCTTTTAATCTACTTTAATTTTCGAATCT  
TTAATAACGCAAAATTTTCATATTTTCATTTTTCTCTTTCAAAAAGATTACAGAAAAAAA  
TAATATTTCGCACAAAATAAAAACTATATAATCAAATATTATTAATTAAGCCAAAATCGAT  
GCATAACAATTTTCATAGAATTCAAAAAAAAAAAAAAAAAATAATAAAATTCGCTCAATTTA  
ATTTAAAATATAACATTTTAAAACGTCCAACAAAATTCATATCAAAGCAAAATATACAAAT  
AATCAATTTTTTATCATTATAATAAAAAATGAAAATTTTAAAAACAAAAGTCAATTATTCC  
GAGAACTTCTTAAATCTTTATTATTAAATTTGAAAGAAAATTAATCCAAAGGAAGGAAATT  
TTACGCTCGATAAAACAAAGTTAACCGAGTATTTAAAATTTGCGCGTAGCAAATATCAAGA  
TTATTCGACCAATTGTTACATGCGAGTTTACTCAGCGGTCGCACAAAGCGATTATTTATACA  
GGGGCGCATTAATTTTCTCGACGGAAATTATCTTTGCCTGTGAGCTCATCGTAAATGCATTT  
CTAATTGTCTCCCTCGTTGCAACTTCATCGTGGAATCTATATCTTGCTATATGACGTTTAAAT  
TATACATACCACACCTCTCCAGATGCGTACGTAGAGGCTGAAGTAACTGTTATTCACGGGT  
GAGTGACGACCATTAATTTTGACAGTAATTGTTCCATTTTTCTTACCCTCTTTCTTTAACTA  
GGTTCAAAATAAACTCCCTATATCTTAAAGCTTTTGCAAATTTGAAAGAAAATTTGATAAAA  
AAGAGAATGGCCCATGGAATTAGAATTGAAATTTAATTTAAGTATTTGGAATAATAAATAT  
ATGAAAAATTTGATTTTATTAAATCATTTTAAAAAATAATAAAGGATAACGAAGAACT  
AATAAATCTCTCTACCCTCTATGATAATATATTATCATATCATGTCATATGACACCATGGTA  
CTAAAATTTAATAAAAAATAGATATAAATAATTCTTAAAAATTTAAGAAATATATTATAAA  
TTAAGAATAAATTATATAAATATTTAAATTAAGACTTTTTTTCGTTTAATCGAAGTTAGATA  
ACTTAACTTATAAATATAAATTAATAATTGTAAAATAGATTGTAAAAGAAAACCTCTCGTCTC  
GAATCTAATCGATTTATTAATAAAATCTTTTATTTGTAAAGTGATACATCACATAATTAATTG  
ATAATTATTATAATTTAAATAAATTTATTTGTAAAAACGATAAAACAAAAAAAATAAAAA  
AAAAATAAATGATATTGTAAAATACTATAAAATACTATACTATACTTAAAATAATATTTG  
AAGAATTGTAATTAATAATGTAATTAATAAAGTTATACATTAATAAATAGTTTTATAAT  
CTTAATAATAATTGCTAT

74. >MSTRG.1438.1 Gene=MSTRG.1438

CGACGCCACATGCCTATATAAGAGGATCGCTCGGCGTGGCTCAACGCATTTGTAAATCAGT  
TTCCAGAGCAGTCAGAAAGTGGCGTTCAAAGTGTGCAGTAGTGTGAAAATTTCTTCCTCCACT  
ATGTTTATAGTTAATTCATCATCATTTTCTTGGCAATAATACCATTATTGCAATATCATCCACG  
AAATTGAAAATTTCTCCATTTACCAAAGAAGACACATGAATTTTCAAGAATGAAATTATTG  
AAGAAAGAAAAAAGAATGGCTCGACGCATTCATAAAGAAATTTTCGGTTCGGATGCAGC  
GAATATTCAATTCCACCGACTGATCATATTTCTTCTATTATTGCGATCTACGACAACATGAC  
ATGAAAACAGACGAATGGATTGCGAAGTTGGACTATTTACGTGCACCCTACGGGGTTCGGTG  
CTTGAACGCAACTATAATATGGTCTGATTAGAGTTTGAAATTTCTTCATACATTTTGAAGTAT  
TTGAGAAGAGCATCTCGAGATATATTAGGTAAGCGGTTATTGAACCGATGTCTTTCTTATTG  
TTCTACAATCTTAACGTTAATATAAGATCAGAAAATTAACATTTAGGGCTCACAGTGTGCGT  
ACTTAATTATTTAATGCAAAATAATATAAAATATAAATCATATTATATGTTAAAAATAATATT  
TAAATTGAATGTATAAATTTTGAAATATATCACATTTCAAAGAATTTCTTTTAAATCAAAA  
TGATCGTAGCGTCACTTTAGCCTTTATCCTAGTTTAGTTACAAATCAGTTATCTAAAATATCG  
TTTTTTATTTCTCTATGTTAAATAGAATTTAATGTATTTTACGATGTCTGCTCACTTCTGAG  
AGAATCGTAAAGTACCGACTGTTTAAATATGTTGATGAGGAGCACTCGTTAGTTTTAAATT  
TTATCGATTTTTAACTTTATTTTTTAAATTTTCGTCCGTTTATTACTTTACTGTAACCTCTTTAAT  
AAATATTCGATCAAATAATATATTAACCTATCTCGAATTATCGAAGTTGAAATCGATAAATG  
CAAATTGATATTTCTACGAATGTGCCTCATCCACGTGAAAATCTTTAATTCAACGTGACGTT  
CTTTTTATAGTTTAGAGCAGACTCGTAGTTAGAGGTCGAGAATAAATTATGGGCACCATCTT  
GTCTAAACCAATACTCTACTACAAAGGCATACGGAATTTGGGAATTGAGAAAAAAAAGTA  
CAGAATCAAATAGAACAGGAAATGAAAAAAGACGATTTTGCGGTTAAAAATATCC  
AATATAAATAATTAAATATACAATTTCGAAATACGATTGAAGATCTTCCGGTTTTATGATTG  
GAAACGTACGGTAGCCTGTTTTTCTTCATTTAGAAAAAAGTTAAATAAAAAGACAAAAT  
TCTATAACGACGAATCATTTTGTTCCGTGGTGTCACGAATCTAAAAATAAATGAATTTTTAT  
GAAACTGGGTAGATATAATAAAATAAAATGAAGATAGTTGAATTACGTGTATTTTCTAAAA  
AAAAAAAAGCTTCAACTGTACAACGTATTTATTTATCTCTATTTTTTAAATATTATGAATAT  
TTTACAAATCACTTGACAAAACTATTGCGTTTTGGGACGGACAAATGAAAAAGGCGATTT  
TTTTCCATGGGTCATGTGTTCATAGAATCTAGTTTAAGTTCAGGAATTGCTTCTTGTATCTTTT  
CGATGTCCTGTAGAGTTGTTATGCCTTTCTCCTATTATTAAACAAAAAAGACATTCCTTAGTAT  
ATTATAATAATTTTTATATATCTTTGTGATTATGAGAAATTTCTAATTTTCTTCTAACTGTTG  
TAAAAAATATAAAGTTTGTTTATTATTCTTGCAACATAATCAAATTTGTTAGATTTTGA  
TGATTAGTGAATGAAGTAAGAAGAATATAAAACAATTCAAGAACCAAGAATAGAATTCAA  
GAGATGAGTGCACAATTGAATAATTAAATATGAAGAAAAATCTTTTATAATTACAAATATG  
TGATTGCATAGTTTTTAACTTACATACGTTAACAAAAAATTTGTTATTCTTAGAATACA  
TTTGAATTCAATAGTTCACAAAGATTAGCAAAAGAAGCAAGAAGAATCAAGATAAAAATT  
CAAGAAAAATATTATTAATTTAGTAAATTGAAGAAAATACCAAGAATATAAAATGTTTGT  
CAAGAAATTAATAAAATCAATCACATTCAAAGAAGAAATTTTTATAATAAAATATTCA  
TAGTTACAACCTTCGTGTAACTTTTTAAATTGTTAATATAAAAAATAATCCGCTTTTTTTTTAAA  
TATAATTGAATTTAGAAGTTTTTGAAGATTAGTGAAAGAAGAAAGAAGAAAGACTACAAGA  
TAATTTATAATGCGTGAGTAAATACGTTTGTACAGAAAGAAAAATTTCTTTATAGTGAATG  
TTTATGGTGATATTATGGTAATATTTTTTAATTATTTTAATTATTGATAAAAAAAGTAGTG

TTTTATTCTCAGAATATAACCAAATTTAATAAATTTTAGAAGTAAAAAATGGAGAGAATA  
ATTAAATTAATAAATAGAAATAAAATTCAAGATTTAATCATTACTTACGTTATATTCTTTC  
CATTTATCATAATTTTGTCTCATAAATCCCACTATCTCCGGCATATTGATGAATACTGTAAAT  
AAAATTGTGTCCATGATAACAATACATACGTTTATAAGCATTCAAGATATAAGAGTTACTG  
ACCATCCCATGCCTCGACCATGTCGTTGATAATGAAATCGATAAAACCAATTTGCGCTCTTG  
GTATCGAGCATGTTATTCTGTCTGAACATTGGCATCATTACTGGAAGATGCAATTGTTTTCTT  
CGTCAGTCTGAAATAAATTCAATCAAATGCATCAAAATAATCAAAAACCTCTTCTCATTTTG  
AAGCATACGTTCAGTACAATGTGATATATGTGAACAATTTTTTAAACGTGTAAACTCACAGT  
AATCTCTAGTCGAGAAAGAATAATTGTCAAATTAAGAAATCTAAAAAGAAAGGAAGG  
AAACGTATGTGTTATTATACGTAATTGACTAAAATACTCTTCTGCAATTCGTCTGGCCCATTC  
GACGCAATATTTCAACGGTCGAGTAGGATTGACACGTCCGCACACTTGATTATCATTCTCT  
TCACTAGTATTACATTCTCTGGCAGTATCGCAGCTGATAGATCTAAATCCTGAGAACCCTGT  
ACTCAGATTTTTAGAGAGAACGTTTATAAGGATTCAAGTAGAGATGACTTTGTAATAGATTT  
ATTTAAAGAAAAAAGAAAGCCGAGATAATTTGGTGAATTTGAAATCTATTTAATAA  
CAAATATAGGAGAAAATGTAAAAGTAATCGTTACTTCGATATACATCTCTGGAATCCTTGT  
GCTGAAGGCATTCATAAACTTGGCGAGATGTTCAAATGTTTCGTCATCTCGGTGGCTAGG  
ATCATGTCTATCACACTTTGGCGAACCTGTTTATAAGTATCTCTTCCAGATTCTATAAAAT  
TTATTTAAATTTTGTTTTACTTTATCCTTTTCGCGATTACGAAGATTAATTCTTGATTTATGA  
TGAAAATTTTGTACTCACTTTAAATATGTTACGTTATCGTCCGATAACGTTAATTTAAAT  
GTTAATGCTGCGTGATGCGATTCAAGAACGGTCAAATCGTTGTAAAGGATCGCTAGTTTGT  
ATCAGAATTGCAGAGAAATTGACTGAAATCGATTAAATGATTATTTGATATTCTAGAAAGA  
GTATAAATACGATATAAAATAATTAAATTTTGGATAATTGTGAATAATTATTATTCTAATAT  
CGATCAGTCGATCGAATTAATCGGATTTACCTCGATCTACCGGGATGATCAATATCGTGAG  
CAGCAGCTGCGATCAAAGTTGCGACTTCGTCTAAAGGTTCCAAAACCTGTTTCAGCCTTTC  
GTTTGCATGAACATAGCAGCAGCTTGCAATACGTCTGCAGCGTGTTGAATTATGATAAC  
GATTCGTAATGTGTAATTAGCCTCTATCACAATCAACCAATTTTGTACAATTTTCTCCTCGC  
AACCGAGTCTAGCTGGGACGCGAAATAGATTCATGATGGTCATTCCCAAAAATAATAGCGC  
TCTAAAAATCGGAGAGAGATCGATCAATTATCAGTTCAATCATTTATCGTTAAATTTCTACTA  
AGAGAAAAAGAAAGAGAATAACGAGTTACGTATAAATTTTTCTTTCATAATCGAATACCTT  
TTCTCCGTCAATATCTCTAATTTGAATATATCGAAATCCCATTCCAAAGACTTCTCTAGAATT  
TCTGCAATTTCTTGAGGACCCCTGTAACCTTTGATCTGCATACGCGTGGAGGCAGCTAACGT  
TTTTGCAGGGGTTTCTCGAACTGATTCTATCGATGGTTTCTAATATCCCATGATTTTTTTGGC  
TATATCGAATAACGTTAAAAATAAAATCGAAATCACAGATGATGATGATGATGGATGATG  
AATTATGGTATAAAAAGAGAGAATTTTTCTTTTCAACATTACCGTGATCAAGGCCTCGATGA  
AATCGGTGCTGGATCACCTGGCTCTTAAAAACTGGTGAATAAAGTTCGGTAGTTTTGAGA  
ATATCAATCGCCTGCATTGTAATTAATTGATCCATATTAACAAAAACAAAATATACGTGG  
GGAATAGAATTGGTGAAGGAAATGGACGACATATGATAATTGATATTGTGATACCTGCTC  
GATTTGTAACTCGTCTCGGACGATGTATCTTCTTAAATCGAGGCCGTAAGGAGGGCGATCA  
CTTTTGTGATGGGTGCTTCTAATTGCAAAGTTTGTAATCACGTTTACTGAGCCGTCTGCGA  
ACTGAAAATTAATTTTAAAAACAATTGTTAGAACACGATGATAATTTTAACTTATCGTTTTCG  
ATATGGCAAATAAAAGGGAATGAGAAAAATTTAATAGCTGATGTTCTATTTTCTTTATCGA  
GTATAAACACTATTAAAGTGACGAGTTAATAAAAAAATTGCAAGTGTTTGTAGTTTTTCAG  
ATAACCTAATTTTTAGCCTCGAGTAGTTTATCGAAACCAAAAATAAAATAAAATAGTTGGA

TCGAGTTGAAATATATTACCTTCTTGAATTCCTTTGAAATTGATTTCCGATACTCTTTTTTGA  
GCTATAACGACAGTTTTTGGATGAGTGATGGGCTGAAGCAGGGGCTGAATAGTTTCTGACA  
AATATGTTGTATCGTATATGAAAATATAATGAGTCGGTTTTCTGAAAGAAAATGTTCAAAA  
GCACATGGGAGGACGATAAGTAAAAGAAGGACGTATTTTTCTTTTTTTTTTTCTCCTTTTT  
TTCTTTTTAAATGATAAATCTAATTTGACTCACTTGAAATAGGCGAAAGGTATCACCTGCA  
ATTAATTGTTAACATTTGATTGTTTCTTCTGAATACAGTTTATATTCCCATCATATTCTCGGCCT  
TTGACTATATGTTGCTCCATTTGAATAAAATTATCATACAAAATTAATCTGTAATGTTTTTG  
CCCCAAAGTTCATTAATCCTGTAGCCTAATAATTTTTCACTAATTTTATTGGCAAACGTAA  
AAAGAAACAAGAGATGATAATAAAAATTAGAGGCAAAATTATTTTTAAAAATAATTGGTT  
GAAATTTTACTTAAATTACAATAAAAGAGTTTTGACAGAAATATCATGATAAATATTTGAA  
ATATTACAGATGTTTAATTATTTATCCTCAATAATTGCAATAGTAACATTTACCTGTATAATA  
TATTTATCGTCCGTCACATGAATCATGTACGACATCTGTCAAGAGCCATATACAGCATGTT  
GACAGCAACCAGTTGTGTCCTCGGTAATATTCCGCTAGTATAAATTCCTACTAATTCGTTTA  
TTAAGATTCTTTCGTGAGCGCATTCCATTAAAGTCTGAAAATGAACTCAAGATAAATACAC  
GTGAAAAATCAAGTTTCGTCTTTCAATCTTTCAAAGATATTTCAGAAGAACTTACTTTTGTGT  
ATCCTATTTCCATTAAATCCAATGTTACGATTTTTTCACTTTTCGCTATGCATGAGATACCTTTT  
ACATATACATATATTGATTTGTAAAATAAACTCGAAGATCGATTGAAAGGAAAGAAGAGT  
AGTTATAAAAGATATTCGATTCAACTTACGATTTTTTTTACAAGAGCTATAATTATGGAATTA  
TAATAAAAAGGACTAGCCCTGATTGCTCTGAAACGAATATATTTATTAGTAGTATTTTTATT  
TGTACTTTCGATTAATGTGATTAACATTTTTTTTTTTTTTTTCTAATAATTTCCATACCTACA  
AATAATGTCAGCTTCCGCAGCGCGTTGCCCCGATGATCGATGATCACTAACTCGTGGCCTC  
GAGCCTGGAAGAATTCGAGTGCTTTTTCCGCGTCTTTCGCAACTGACACGCTCCATCCCAAA  
CGCCTCGAAGTAGTGGAAGGATATCCATTTGTTGATCATCTTTGGGGAAGACCAGTAATA  
TCTGAATATGAATAATTGCAATAATCGATAAGATATATATATATCAATTCATGAATGAATTC  
TAGCATCGATAGATCGTAACTTACTTTTATGAGACTAGGAATACTGTTTCGTTAACGGATGGG  
GTTTCACTATCGTGGGATCCTATCTGAAATCAAATCAACACGCAAACTTTGAAATATCGAGA  
AAAATCTTGATCCTCTCGAATTGTTAATTATTATTTCTTTCGTTAAAAATTTTCTTCTTTTCCA  
TTATTTTTCTTCCCTCCCTCCCTCCCCCTCCTTCCCTCCTCCCTCCGTATTTTTTAACAATA  
TTGCTAATCAATTTTGAACGTACTACTGTCTCGCTATCACGTTCAAACGTGACAATGGCT  
TGTGAAATTCAGCGTATTCCCGCTGAACTTTGGCCCGCCGACGTGCACGGGCCGATTCTTTT  
AAATTTTTTTGTATATTCCCATCTTGATATTTTCGAGTTTGCATTCTGACTCGACTAAGTATCG  
CTTGTTTTTATACGGTGTGGAATTGTTGTATAACCTATACATGTTAGGAACACGGCAAAGAG  
ACAAACGAATCTGAAGTTGAGGCGTAACAGCGAAATAAGATGAATTTATTTCTCTTCTTTG  
ATAACGTTATTCCGAATCTCGATAACATTTTCGATCAAGACGATAATTTTCTAAATTCAGCT  
TGAAAGAATATCGTCGTAGATGACTTTTTGTTTCTTTGTTTGTATCTTTCTTGTTATTTTTTTTT  
TTTCTTCGAGATGAAGATTGTCCAATCAAACGTTGGATACGCATCGTGCCTTTTATTCTGAG  
CGCATGAAACGTCCCCAAGTACATAGGTACAGTTTGATCAAGAGATGTTGAAATGAATCTC  
GAATCATCCTCAATCATCTCTTTCGAACGCGTATCTTGAACAAAGGGGCATGCTTGCGCAAT  
GATGAAACACGAAGAACTTTGTTGAGAGGGAACTTTTTCGTAATCGTCATTAAAAAAA  
AAAAAAAACGGGAAGAAAATTATAAATTCAAATTTTAAATGGAAAGATCAATTGCAAA  
AATATTTCAATTTGTAAATATTGTATACACATCTATTGTAATCGCAATAAAAATTGTTGTTGT  
ACGATTGTATCATTTACTGCCACGAAAAAAAAAAAAAGAACGAAGACGATAAACCGATAAA  
AACAATCTATATAACTAATCTATATATAACCAGTTTACCGTTTCGTAATGCAATTTATTCATT

ATTCCACGATACGAAAATACGAATATAGAAAAACAAAGACCTAGTACGAGGCGAGCAG  
CACTTCATCATCTACAATGATCCTCTTTTGAATTGACGAATAAATCGACCACAGCAGTAAC  
GAAATTCTAAGTAAGTGCAACCTATAATAATATTTCTTTTAATTTCTTTTAGTTTCGTTTTAT  
CTCGACGAGAAATGGGAGAGATTAAATTAATCGATAAACGAGTGTTTTATCGTGTAATAA  
TTTTCCAGGACGAATAAAAAAAAAAGAAAAAATTATTATTGCTCGTGATTAACAAAAA  
AAAAACAAAAATATGTTGCAATATATATATAAATATACATCGAAATTTACGAAATGGATG  
AACAAATTTACAAACGAATAATAAATTTACAGATCGATATTGCGATCGATTCTTTTCATATA  
AATGGATCTTTAATCGATTTGGAAAGATAGCGGATCGTACTAAGAACTTTCAATTACGTTT  
CACACAACTTTTCTGGTACCTGTGTACCGACACAAGCGACGGAGGTATCTCGTTTACGTGT  
ATCTTGTGAGTCTTCCATTTCCTTCGAAACGGTTTACACAATATGTTGGAGATCCAATTGTAC  
CACGATATAGATTTCTCCTCCTCTTCGATCGAGATATAGATCGGTTTCTGCGTCGACCTCCTC  
TTAATCGTTTTCTCCTCTTGGTTATACATTATTATTATTATTATTATGAAGATAACAGAAAAT  
TAAAATTAATTGACACAAAAACGTGGATGATGGACGAGGCACTAATATAGATCGATTTCG  
ATCAATAAAAAACGATGATCAAACATAATTAATAGTGAATCGGTTTCGTTTCGATATTTTCAA  
AGGAGAAAAAATGATTAAAAATCGTGTCCCTCATTGTTTCATCGATTTGGGTTTTGAACTTGG  
AACGATGAAAGAAGTGACATGTTTCGACGATGCAATTTGACGAGATTGATAAGTTTACGGA  
AAAACGTCCATCGCGATACTGAATCTATATTATCATTGTTGGGAAGATTATTCCTCTTTATTA  
TCTATCTACTCTAGCAGCGGAACATGTCCACGATAAGAAATTTCTTTCAACAAGAGATCAT  
CTCCGTCAGATTATCAATAGTAAGAATTAGATAATAACTCGGTCGTCACAAGCAGATGATT  
AATTATAAATAAAGCGATATCGTTTTTTTTCTTTTTGTTTATCGAATTGTTGAAAAATATATCC  
AACCAGATATCATTGTAATTTTTCACGATAACAATTGTCGATCTATAAAAATTTTATGCCAT  
TTTAGAGAAAGAAGCTTGCCATTTTTAAATATTATCGATTAATTCGAAAATAATTTTGAAGA  
AGAAAAACTCGTATACAACGAACCTCTCTCCCCTCGTTGAACTGAATTTCCAATGATGAATA  
GTGTATGCTTCCAAAGTACAAGAGAAAAAAAAGTCTCTGAATTGAAAGATTACCCTTCATG  
ATAAAAAGAAGGAAAAAACAGATTCGATAGAGAATATATAACTAACATTTACTAGTACT  
ACGACTAACTATAAAATAACAACTTCTCAGACAACAGAAGCATTAAACGAGAACTTTTC  
CCTCGCTGAATCCTACCTTTTCGTTAATTCGCACGATAATATACAACTGAGCTGATATATCG  
CGGATAAAAACTTGACTAGAAATCTATTTTAAAAAAGCGGTCAGACTTTTAACAGACTTC  
AACTGTGCATCGCGTTTAAATCCTGACAAATCGATTTACGGCAAAAGAAAGGTAAAAGTAC  
ATGAAATATATGAAAGACTGAATTTTTCATTTTAATAATTTGAATAAAATACACGGGTAAAA  
ATTTACGAGAAATATTACGTTGATTTACACAGGGAAAAACAAGCATGTACGAAATCCCAA  
ATTTTTCCACAAATTGTGCAAGATACGAGTTCTTCTCCTACTCCTCCTAGGTGCTCGTTCC  
AAGCTCTTCCGGCTATAGACCGTCTATAGATCGTCTATAGATAACAGCTTATACCCTGTCCA  
TCTGTTTGATCGAGCAAGAGAAGCTTTCAACGTGAGAGAAGGATAAGAAGAAAGACGAGA  
GAAAGAGAGAGAGAGTGAAATAGCGGATGGCGTTTAATAATTCGTCACGAAGTGGTGAAT  
CGGTCAGCCTGTTCAAATATTTAGGACAGGTTTAGACGGCAGTGTCGTGATGATACTTTAGT  
CAAGCCCCTTCTTGAATAATCCATGAAAACATTTGATGCAAGTTTAATGAGATCACTCGAC  
ACACTGCGAACGAGCCACGTGTTTCGGGGAGGGGAAAAAACAGTATGCAATTACTTCAAC  
ACAATTACTTGAGGAAAGGGTTAATTATCGGGTAATCGAATGCTCGTGAGAAAGAAAAAG  
AATGACGAATCGATTCTCCAATTTTCGTTCTTTCCCTTCCCCTCTTTTTTTGTTCCACAGACC  
TTTGAAGTAGTTTTTCCCTTCCTATTTCCCTCCTGCTCATTTCGATGATCGATAAGCTAACTTTT  
TGGAGAATATTGGAGAAATATATGGAGCACTGAGATAAGATTGATTAATAATGAATGAAG  
AATTGGAAAAATTGAATAGAGAAGAACATAGTACAAAAAGTATTGAATTTGATTATAAAA

[illegible]

AATCCAATGTTTCAAATATTTTATAAACGATTAATAAATGTCGAGAGAAATCAAAAATT  
 GACAGATTTAGACAGTTAATTTGTATTGTAACGATGTGTTGTAACCGACTCAGAGACAACG  
 ACTGGTCGACAAAACCAAATTTGTGCAGGTTAAAATTCTACGCGTGAGTGAGTGGCCTCAGG  
 AACGAGATAGGATCGTTGGAGAACTCGTGATACGATGATCATGTTTCGTCAAAACGGGAGC  
 ACGTTTCAAGGGAACACGAATAATGAATGAAAAAAAAAAAAAAAAAATATCAAAAAGAAAA  
 GTAAAATTTTGTGCGAAAATTTAGAGACGCCTCGTTTCTCGCAAAGCAAAAGTGCTTCGAG  
 TTTATGGCTGGTATTGAATTTGTATTGAATTTCTTTTCTCACTCCATAGACAGCTTTGAAAGT  
 AACAGTTTGATGCGAGGCAAACAAATTATATATATTGGTGCTAATAATATTTTTCTTTGG  
 CTGTTTAAAATATTTGCTTGATATATATACATCATAACATATATATATATATACATGTGCCTGT  
 TGTTTCATTTTCTCAAATTTGAATGTCGATTGGCTGAGGAATTTAGTATTACCAAATGGATCG  
 AAATGAAGATTATCATGGAGATTAGTTTCCTTCTGATAATTGTACGTTAAAAAGCGTGAGT  
 TTTTTCTTTCTTTTTTTTTTTTTTTTGTAAAGATTTTAGCGCTTGTAAGAATAATTAAATGGAAGC  
 CTAATAAGTTTGAGTAAATGTGATCGAAGATGTATTCGCTGATTTTTTGGTATGTATAGAAAC  
 GAAGATGATGTTTACAATTCCTCACAAATTTCTAGAAGAAAGTCTACTATGGTTTGAGAAAA  
 ATTACCGAGAGATTTTTTTTTTATTAATTATTAATAAAATTATGCTTATGAAGAAAAGAATAGAC  
 GAAATTAGAAATTTTTCTTTGAACAGAATACGCACAAATTTAATAAAACACTCGATGAAAC  
 TATGCTTCCAAACCAAAAAATAATGTTCAAAGCGATAATTCAATAATTGAAAAGAATGTAT  
 TCAAACATAGTCGAGACCGAATCTAGCACACTAGATTTAAAATTGCAATAGCTGTTCAAAT  
 TATCCGAACAAAATCATCATTTTCATTGCTTTCTAAAAATGAGCAAAGGCATTATTGCCATTA  
 ATCCTATCTGAATTCTGTTCACTTCTATTAAACTGCACCTTTGGATAAAAAAGATATCTGTCTG  
 TATAAAAAGATAAAAAATGTTGTATGAAGTTTTGAACTTATTCCTATGGATCAACTTTGAGAT  
 CGAAAAAGTAAAAGTAAATATCTCCCGCAAGATTACGTTATCAGTTTTCGAGCAATTTACG  
 TATCGTGCACAATATTTTTCTTATTCTATTTCGATTTAACATGTATATAACTGGCCATTGTGT  
 TAAATGTAATGTGTCTCTAAATATGATGTCTCTTACACTTCATATTACCTTTGACTGATTTTT  
 CTTTTCTCAAACTGCTAGAACCAAGATCTCGCCAATCTATGATATATAAATAGTGAGCTTT  
 GATATCTTTGATTTTTTTTTTGTAAATTGAGTTTCAATAACACGAGTACAAATGATGATTAACAT  
 ACGTAGCTAATTTTGCTTGCACGCTCGCAAAAAGAACTCCGTATGGAATTGCCATCCGGC  
 ATTATCTGTGTCTGATTTGCATTTCGTAACCAACACGTATCCAAATATGTGTGACTCTTTTATC  
 AAAGAATCAATATAGCGTTTTATTTCGATATTATATCTCTGTGCCATCGAGCTTCTTGCTTACA  
 AAAAAAAAAAACGAATTTCAATGGGAGACATGAATGTGATTAAAGATTAATTGAAATTTG  
 AATATTGATAAGAAGAATAAAATTCGATCCAATCAATAGAAATGAATTCAAATGTTATCA  
 GGAATTTTGTGAATGAGTTTTATTATTTATTAATTCCATTTAAAAAGCAC

75. >MSTRG.1443.1 Gene=MSTRG.1443

CGATAACAATTGGCCAAGCACCGATTATTTTCAAGAACGGTTGCGCGTAGAACGCTTGCTT  
 CAAATCTTTTTCCTTCGTTTCCATTATTCCTTCCCGATGATTGAGAGTTGATGAGATTGAAAT  
 TGAACATCAACATACAAATCCAGGTTGTGCCATTTGCAAAAAACGTTTCCATTCTTCTATCG  
 GTAATCTAGGCTACACCAATGCATCATTAATTTGAGAAAGGTGATCAAATTATAGACATTC  
 CAATTTCTGGTTTACCTTTTGATCTTCGTTTGATATTCCACTATGTCCACAATTCTTCTGCA  
 TGGTATTCTCGCTGGTAATCGATCCATCCGCGAGATCGATCATTTTTCTTCTTAAAATCTTCA  
 AAAGACTGCACATATGGAGAGAAAGCATCAAGGAAATTCCGATAGTGCCACTGAGAACTG  
 TATAAACGAAAACCTCCAGCCAGAATTTGCAGCATAAAAATCATCTCGTAGTATGGGCTAAC  
 TAATTCGTTAAAAAAGGAACATGACCAAAATGCACGGAACAACGATACACATTTGCAAGG

AAATGGAGAAAGATATTATAAACCATTTTTGTATCTTCGAGCTCAAAGAAGATTTCGATAAG  
AATTGGCCAAGCACCGATTATTTTCAAGAACGGTTGCGCGTAGAACGCTTGCTTCAAATCTT  
TTTCCTTCGTTTCCATTATTTCTTCCCGATGATTGAGAGTTGATGAGATTGAAATTGAACATC  
AACATACAAATCCAGGTTGTGCCATTTGCAAAACGTTTCCATTCTTCTATCGGTAATCTTAA  
ATCGGTAATCTAGGCCACAGCATCATCAAATTGAGAAAGATGAGATTGAAATAAAATGAT  
CATGCAAATCCGATTATCCCACTTGCAAAGCGATCTTTCTATTGGTATAACTTCGAACAGA  
CCGCAGCAGTGCATCGTTATAGAGGCAATCGAGCTGAACACGTCCAAAATGCATGGAGCC  
ACGATACATATTTGCAAGAAAAGATAGAAAGAAATTATGAACCATTTTTGTATTTTTGAGC  
CCAAAGAAGATTTCGATAGCGATTGGCCAAGCACCGATTATCTTCAGGAACGTTTATGAGAC  
TGAATAATGTCAGCGATGCGGCCACGCAAATCTCGGTTTTTTAAAATCGTCTCGATCCTTCT  
GTTGGTGACCTCGAACAGACCGCAGCAGTGCATCGTTATAGAGGCGATCAAGCTGTAGATC  
CCATAATTCAAAGACATTATTAGGAACTGGTGAACATTTGCACGACGAAAGTTATCTCGT  
AAGTTGGCGAGTCTTCGATGACAAAGAAAACGTAATCGCTCAAGTATGGCAAAGGTATCTG  
AGTACTGTTGTCCGCTTTGACGATCCTCTCTGATATGAGGGGCAAAATAACGTGATAGGGC

76. >MSTRG.1443.2 Gene=MSTRG.1443

CGATAACAATTGGCCAAGCACCGATTATTTTCAAGAACGGTTGCGCGTAGAACGCTTGCTT  
CAAATCTTTTTCTTCGTTTCCATTATTCCTTCCCGATGATTGAGAGTTGATGAGATTGAAAT  
TGAACATCAACATACAAATCCAGGTTGTGCCATTTGCAAAAAACGTTTCCATTCTTCTATCG  
GTAATCTAGGCTACACCAATGCATCATTAAATTGAGAAAGGTGATCAAATTATAGACATTC  
CAATTTCTGGTTTACCTTTTGATCTTCGTTTGATATTCCACTATGTCCACAATTCTTCTGCA  
TGGTATTCTCGCTGGTAATCGATCCATCCGCGAGATCGATCATTTTTCTTCTTAAAATCTTCA  
AAAGACTGCACATATGGAGAGAAAGCATCAAGGAAATTCCGATAGTGCCACTGAGAACTG  
TATAAACGAAAACCTCCAGCCAGAATTTGCAGCATAAAAAATCATCTCGTAGTATGGGCTAAC  
TAATTCGTTAAAAAAGGAACATGACCAAAATGCACGGAACAACGATACACATTTGCAAGG  
AAATGGAGAAAGATATTATAAACCATTTTTGTATCTTCGAGCTCAAAGAAGATTTCGATAAG  
AATTGGCCAAGCACCGATTATTTTCAAGAACGGTTGCGCGTAGAACGCTTGCTTCAAATCTT  
TTTCCTTCGTTTCCATTATTTCTTCCCGATGATTGAGAGTTGATGAGATTGAAATTGAACATC  
AACATACAAATCCAGGTTGTGCCATTTGCAAAACGTTTCCATTCTTCTATCGGTAATCTTAA  
ATCGGTAATCTAGGCCACAGCATCATCAAATTGAGAAAGGTGATCAAATTATGAGATTGAA  
ATAAAATGATCATGCAAATCCGATTATCCCACTTGCAAAGCGATCTTCTATTGGTATAAC  
TTCGAACAGACCGCAGCAGTGCATCGTTATAGAGGCAATCGAGCTGAACACGTCCAAAAT  
GCATGGAGCCACGATACATATTTGCAAGAAAAGATAGAAAGAAATTATGAACCATTTTTGT  
ATTTTTGAGCCCAAAGAAGATTTCGATAGCGATTGGCCAAGCACCGATTATCTTCAGGAACG  
TTTATGAGACTGAATAATGTCAGCGATGCGGCCACGCAAATCTCGGTTTTTTAAAATCGTCT  
CGATCCTTCTGTTGGTGACCTCGAACAGACCGCAGCAGTGCATCGTTATAGAGGCGATCAA  
GCTGTAGATCCCATAAATTCAAAGACATTATTAGGAACTGGTGAACATTTGCACGACGAAA  
GTTATCTCGTAAGTTGGCGAGTCTTCGATGACAAAGAAAACGTAATCGCTCAAGTATGGCA  
AAGGTATCTGAGTACTGTTGTCCG

77. >MSTRG.1457.1 Gene=MSTRG.1457

AAGTGAGATGTAGTGGATTGATGTACAATGAAGTGAAATTTATGGTTTCAACTTATATTTTT  
TTTGTTTGTGTTTTTTTTATCGTTTCTTTTATTTTTAAATGAAAACAAATTGACAAGTTAAATT



AATATTTGATAAATGTGTCTTTTTTAAAATTGTTTTTAATACGAGGAATAGTGAGATACTTCC  
ATAAGAATATCCTACCTGTTTCGGCAACCAGATCGCCTATATAACAAAATATGAAGATATTG  
AAAGTGATAGATATGATTAAAGCTACCCAGCTCGACAACACCTGCATCTGGCCGCAAGCAT  
GCACCGCGAATATAGCAGCCAACTACAAGCTGCAGTAGTTATGGTATGCAATAAAACAC  
CGGCGACCAATTGAATGCAAAATACAATCTCATTTCGTAAAACTATAGCGAGTGTTCGATGAT  
GAATCTCGAGAAGGGAAACACCAAGGGAATGAAGATATCTTCCACTTCGAGGATCACGTA  
TAAACTGCATGGTATCGAGAGGAACTTATTAGACTGTAGCAGATTACATTTATTAATCGAT  
AAAGATATTTTCTGTCGTTGAAATGGTGGAGGAATTGGGCCAGAGACCGATCGGTTTTAA  
AATCCAGCGACTCCATTGAATGCTCAGCCAGTTCGACAACACTTGCATCTGGCCGCAAGCA  
TGCACCGCGAATATAGCAGCCAAGCTACAGGCTGCAGTCGTTATCGTATGCATCAAAGCAC  
CGGCGATTAATTGAATAGAAAATACGATCTCATTTATGAAACTGTAGCGAGTAT

78. >MSTRG.1495.2 Gene=MSTRG.1495

GAAAATCAAAACCGAACGTGGTATCATATCCCGTGTTCATGCATCCACGATACATCGATT  
CGATACATCAATAAGAAGGGAAGCGATGCGGAAGAAGTTTTAGCGCGCGTCATTTTTCCAG  
AGGATGAATTACAACCTGCGACGACGATAGGCGAGGAGAGTGTGCTCTTCATCGAAGATG  
TGCCGTCGTATGTATGTTGACACTGTTGGAGAGAAGGTTTGTGGATTATTGGTGACTAACT  
GACACTTGTTGATTTCGAGAATTATTGTTAAATTTCTCGTTTATCTTTGGCCATTTCGACGGG  
ATAACGCGAAAAGACAATCTATTGGATATACAGACAATTCTTACGTAACGCAAGAGGATT  
ACGTTTATTTTTTTAATAAAGTGTTTAAATGGAAATGATTAAACGATTTCGACTCGTTGCTCGGG  
GAAGAATTATATGAAATCTTATCGAAGTTTCTCCTTATCTCTCTTATTCATTTTCGATAAA  
CGAACGCGTGAAAAAAAAAAGACAATCACGAAGATATTCTTACGTAACGCAGCTCCGG  
AGATTACGCTTATTCCCTCTTTTTTTAATCCCTCGTTTATCGTTCCCATCCGATATCTCGAAT  
CACAAACACAGGTGACAACGCGTCGTTCAAATAACACGAGGCTCGACGGGTGTATATCGG  
TCGCGAGATGCAGGTAGTCGCGCATTGTTTGTATGTACACACAGTGAGGGTCCACGCCTTTC  
CGCGACCATTGACTCATCAAGGCGAAAGGCATCGAAGGGATTACGCGAAATATCAGGCAG  
GCCCCAGATACACCGCGGGTCCTAACCCAAGGGACCTAACCCGAGGGCCGACCGACCCCTC  
CCCCGACCGATCAACTCCCTCGCCGAGTTGACTCGAACGCGGTGTGTGACGGACCTACAGC  
ACCAACAACAGGAAACGAACCCGGATGACTACCGTCTCGCTCCGAGGAAACGAAGCTAC  
GAAGCATCGTGACAGAACTGGAACGCAACCAACTCTTACCGCGGTTACGCGCATCGCA  
TAATCTCGTTACCGTCTTCTCCTCAGCCGGTCACGCAATCGTCCACGAAATTCACGTGCCTTT  
CGTGGCATCACGTGTCGAATCCGTCCGTGCAATCCTTGACAAATGGTATCAAAAGTGGAC  
AGGAAGTTTCGATTCTTGATTGAGAGTTGATTAAACCCCTTTTCGGTTAAAAATTTCGATTGGC  
TATCCGTCGTATTTGAAAATTTTTTCGGGTATAAGTAATGAATTATTATATCGAATTATCAGT  
AAAGTTTCTCGTTTTCTCGGGTACAACGATCGAGCAAAAATGCATCCTCCAAGTTCCTTAAC  
CTCGCGTTTCGATTATGGGGCGATTATGTGTCTGTTGTTCTTCGCGGAAACAGGCGTCAGTTT  
CTGGTCGAGAAAATTCTCTCCGAAGAGGAGGAGTGCTTCGACCCCCACGGGAAGGAGTTTC  
GTTTTTGTAAACAAGCCCGCGTGCGTTTCGGCCGGAAGGGGCCGGAAGCGAGCGAATAATT  
TCGCAATAAGGTGTTTCTAATCGCCTCGCAATCTCGCGTATCCTCCTCGGCATTTTCGTGCAC  
GTGGAATCGTAATTAAGAGGAGAGGAGAGGAAGTGGCCGGTCAGGAAACGAGAGGACGA  
TTTTTCACGGCCCTCTCTCATTGTTTGTGGCGATAAAACCGATTATTCTCGCGATCTTTTTTC  
GCGCGAGGAGGGAACGAAGGGAAGACGAAGCGGCACAGGCCGACAATTTCGCTTAAATGG  
AACCAAGAACACCATTACTCGTTTATCGAGCGTTCGCCGTGCACAACTCGTGCGATCTATT

GTATTACCCGACCGATGAGAAAATTTTCATCGTGTTATGGTGCCGTTGCGTGCCACGCCGGCC  
TCAATCCTTTTAATGGCCATCCCCTATCATTTAAATCCCTCACCGGAATGGTTTATGGTTTA  
TAAATGAAGATTGTCTTCGCCTCCAACCTTCGTTTCTAATATTCCTCGCAGAAGTGAGAAGAC  
CGATCGATTCAATTTCAATCTCTAATAATTCAGGGAATTTTAAATTTTACAATTCCATAAGA  
AACAAAGCAATCAATATTTAACGTTACGAGGAATCGTTTTTCATTTTGCAAAAATGATTACG  
ACGCGAAAGAAAACAAAAAATAAATAAATTTTCCAGAATCGAAGGGGCTAGATCTT  
CGACGATCTTCGTGATTACGTGCGAAAGAAAGTCGCGAGAGTAGAAAGATCCATAAATCG  
CTGCGACAGCGGCGGACTCGCAGGCCGACAGGCATAGAGAGCCAGACAGTCGCCAGG  
CAGACGGACACCAGACGGAGACGGGAGAAAGCGAAGAGGAGGAGGATTTCTGTCTGGAA  
ACAACAGAATCGACGACCAAAAGCAAACCTCGGCGTCCATGTTCCGCCACCTTGAGACTTG  
AGGCGACTTCCGTGCCCTTCGGGTTGCGCGAAATGGGATCCATTTGCGGATTTCTGCGAAC  
ACGATCCGCGGAGTAGAAAAGCTTGAGAGGCTGGAGGAAGAGGCTGGAGGAGGAGGAGGA  
TGGAATACAATGGCGCGGATCGTGGCTGCCGCTTATGCCCTTCGTTATGGGGAACGCACG  
AATTGTTAGAAACCGTCGTGCGCCTGCTAGGTGCAGCCGAAGGTTTCAGCTGGAACCGGGCC  
AGCGGCAATTCCGGATGGAATCTCATTCCGAGGCGGATATCTTCGTTGCGTCGAGATTGT  
ATCGACCACGGTAGACAAGGACTAAGGTCGCGTCCGACTCCTACGG

79. >MSTRG.1495.4 Gene=MSTRG.1495

GAAAATCAAAACCGAACGTGGTATCATATCCCGTGTTCCATGCATCCACGATACATCGATT  
CGATACATCAATAAGAAGGGAAGCGATGCGGAAGAAGTTTTAGCGCGCGTCATTTTTCCAG  
AGGATGAATTACAACCTGCGACGACGATAGGCGAGGAGAGTGTTTGCTCTTCATCGAAGATG  
TGCCGTCGTATGTATGTTGACACTGTTGGAGAGAAGGTGACAACGCGTCGTTCAAATAACA  
CGAGGCTCGACGGGTGTATATCGGTGCGGAGATGCAGGTAGTCGCGCATTGTTTGTATGTA  
CACACAGTGAGGGTCCACGCCTTTCGCGACCATTTGACTCATCAAGGCGAAAGGCATCGA  
AGGGATTTCAGCGAAATATCAGGCAGGCCCCAGATACACCGCGGGTCTTAACCCAAGGGAC  
CTAACCCGAGGGCCGACCGACCTCCCCCGACCGATCAACTCCCTCGCCGAGTTGACTCGA  
ACGCGGTGTGTGACGGACCTACAGCACCAACAACAGGAAACGAACCCGGATGACTCACCG  
TCTCGCTCCGAGGAAACGAAGCTACGAAGCATCGTGACAGAAACTGGAACGCAACCAAC  
TCTTACCGCGGTTACGCGCATCGCATAATCTCGTTACCGTCTTCTCCTCAGCCGGTCACGCA  
ATCGTCCACGAAATTCACGTGCCTTTCGTGGCATCACGTGTCGCAATCCGTCCGTGCAATCC  
TTGACAAATGGTATCAAAAGTGAGACAGGAAGTTTCGATTCTTGATTGAGAGTTGATTAAAC  
CCCTTTCGGTTAAAAATTCGATTGGCTATCCGTGCGTATTTGAAAATTTTTTCGGGTATAAGTA  
ATGAATTATTATATCGAATTATCAGTAAAGTTTCTCGTTTTCTCGGGTACAACGATCGAGCA  
AAAATGCATCCTCCAAGTTCCTTAACCTCGCGTTTTGATTATGGGGCGATTATGTGTCTGTTG  
TTCTTCGCGGAAACAGGCGTCAGTTTCTGGTCGAGAAAATTCTCTCCGAAGAGGAGGAGTG  
CTTCGACCCCCACGGGAAGGAGTTTCGTTTTTGTTAACAAGCCCGCGTGCGTTTCGGCCGGA  
AGGGGCCGGAAGCGAGCGAATAATTTGCAATAAGGTGTTTCTAATCGCCTCGCAATCTCG  
CGTATCCTCCTCGGCATTTTCGTGCACGTGGAATCGTAATTAAGAGGAGAGGAGAGGAAGT  
GGCCGGTCAGGAAACGAGAGGACGATTTTTCACGGCCCTCTCTCATTGTTTGTGGCGATAA  
AACCGATTATTCTCGCGATCTTTTTTCGCGCGAGGAGGGAACGAAGGGAAGACGAAGCGG  
CACAGGCCGACAATTCGCTTAAATGGAACCAAGAACACCATTACTCGTTTATCGAGCGTT  
CGCCGTGCACAACTCGTGCGATCTATTGTATTACCCGACCGATGAGAAAATTTTCATCGTGTT  
ATGGTGCCGTTGCGTGCCACGCCGGCCTCAATCCTTTTAATGGCCATCCCCTATCATTTAAA

TCCCTCACCGGGAATGGTTTATGGTTTATAAATGAAGATTGTCTTCGCCTCCAACCTTCGTTTC  
 TAATATTCCTCGCAGAAGTGAGAAGACCGATCGATTCAATTTCAATCTCTAATAATTCAGG  
 GAATTTTTAATTTTACAATTCCATAAGAAACAAAGCAATCAATATTTAACGTTACGAGGA  
 ATCGTTTTTCATTTTGCAAAAATGATTACGACGCGAAAGAAAACAAAAAATAAATAA  
 ATTTTCCAGAATCGAAGGGGCTAGATCTTCGACGATCTTCGTCGATTACGTCGAAAGAAAG  
 TCGCGAGAGTAGAAAGATCCATAAATCGCTGCGACAGCGGCGCGACTCGCAGGCCGGACA  
 GGCATAGAGAGCCAGACAGTCGCCAGGCAGACGGACACCAGACGGAGACGGTGA

80. >MSTRG.1517.4 Gene=MSTRG.1517

ATAAGATTCACCTGGCGCACTTTCAGCACGCAGTTCGCGACGGCAGAGATTGCGGCCGG  
 GGGTTGCAAATGGGGTGTCAACGGCATCAGGATACTGGAATAATAATCGAGAAGTGATAA  
 TCGCAAAGCCACAATGGATGGGACGAAAAGCGAGCCGAGCAAGAGCGGGGCTGTGCAAC  
 GGGAGTGCGGTGGTTGCGGAGAGGTAATTACGGAAAGGTATCTTCTCAAAGTGTTGGACAT  
 GTTCTGGCACGAGGATTGCTTAAAGTGCAACAGTTGCAATTGCAGACTCGTGGAAGCTGGT  
 CCTCGCTTTACATTAAATCTAATCTGATATTGTGCAAGAAGGATTATTTAAAATTGTTTGG  
 ACTCACTGGCCATTGCGCGGCCTGTAACAAAACCATCCCAGCCTTCGAGATGGTGATGAGG  
 GCGAGGACGAACGTCTACCATTGGAGTGTTTTGCGTGCAACAATGTAACACTACAGGTAAG  
 AGG

81. >MSTRG.1537.1 Gene=MSTRG.1537

CTCGTTGCTTTGTCGATCAATACTCGGTTTTTGCTTATTATTTTCGAAAAAATATGGTAAATC  
 GTAATGATCGTATCATTGAATAATAATTCATGACACAAGGAACACAATAATATTAATAATT  
 GTCATATATATGATGGAAAAAGTATTGAAATTACAAGTTGAAAGATAATGCGCATTAGATG  
 CCGGGTGCCGGTACAAGTTCTCGAACTTTCAGCACTGCGACGCCGCATGCCTATATAAGAG  
 AGCCGGCCGGCTTGCTCGGCGCATTCGTAAACAACTTTCGTTTCGGTTTGGACGCAGTGA  
 ACACCCGAAGACCCACTAACCAGTGAATATACCTCTACTTCTTTTACGTGGTCCACGAGGC  
 TGCTGACAATACGACGTGAAAATGTAGACGAGACGGATTCCGGTGCGGAGCGCGACAGTTT  
 ACCTGCACCCTGCGGGGTCGGTGCTTGAACAATCCGTACGCAACCATAATCTGATTAGAGA  
 GTTCGAAATTTCTTCACACATTTGAAGTATTTAAGAAAAGCACTTCGAGTTATATGCAGTAG  
 TTTAGAGCAGATTCGTAGTTTGAAGTCGAATAAATCGTCGGCTTCGTCTTGTGCGAACGAAT  
 ACTCTACCACAAGAACATATGGAACCTTGGAGTCGAGAACGAAAAATAAAATCAAAACGG  
 AACGGGAAATAAAAAGAAAAAAGGAACGTAAAAAGGCTCGGAAAAAATAACGGATCA  
 TTTTCCTAGCGTCGAGCAGCATCGAGCGAGTCCTTTGCTCGGGACTCACCACAACCACCAC  
 CACCACCACCACCGAGCTCTTCTCTCCATCTTTTTACCTTTTTGGGTGCCGTGATAGTTAAAA  
 CACCATCTGAAGATAGACTCGAGGTAATGTTGATCACGTCGTGAGATGGAGGCAAGACGT  
 ATCTGCGTATGAATTGTCGGCTGACAAATCCGTGCTCGTCTTGTCTCTCCTCGTGTTTTGCTT  
 CGACAATAACGTTATTACCGACCGTCTTCACCGTAATCTCTTCCGGTGAGAATTGTTGAACA  
 TCCAGTATTACCTGTGGAGATCAGAGCAGAACAATTGAGACAGGCCCGAAGTTTAAAAGG  
 TCGAGCAGGGAGATATCTTTTATTGGAGCAGATGTTACGTGTAACGAATATGATATTTCAA  
 ACAGGCAATAAGAGAGATCTGAACGACCGTTGAGAAAACGCATCCATTCCACATCCGATT  
 CTGGCCTCGCATCTTATAATATACCATTGATTCTATTAAATCATCATTTATTGCGAAAATTC  
 AAATATCAAGCTTTTTTCATCACCGATTACGGGAAAGGCTAATCTTTTGAATTAACGCCGCT  
 TTAAGCAAATGAAGTTCATCTTCGCCTGCTATTGAAAACCTACGTTTAGAATTTAACACGTT

AGGCAGTCTGTGTCTATATTTTCGAAATAACAGATTTTTCTTCTCTGAAAGATCCCTAAATG  
TCCAGTTATTGGATATAAATTTGCAGTCAGCTATTAGCTACAATACGCACAACCTTTCTAAA  
AATCTTCTGTAATAATCACTTTAATAAGTATTTGACAGAAAAAAGTAAAACAGTGAAAAGT  
ATAAAAAAAAAAATCCGTTCTTCCGTAATTCGAGTTATCCATATGCAAAATAGACGAGC  
CACGAGGCTCGTTGGCGTTTAAAAAATATGAATACATATTAGAAAAAAATGTAGAAAAGT  
AGTTTGTTTTCTATTTTCTACTGGTTGCAAAGTTTCGCTTATTTCTTTTTTTTTTATACATAC  
ATACATATAAATATATATATATATATATCTTTTCATATGACATCTGCGTTTTCTTATGTTGATT  
CTAATATAGAAGTAACCGTTGTGACGAGCAAACCGGAAAGATGTAGTTAAAAACAAGCC  
TACTGTAACATCTTTTCTTTTTTTTTTCTATTTCGCAGAAAAGACAAGCAAAATATGCAAGTA  
GGTGGAATGATTTTTTATTATTGAGCAAAAACAAACAGAATTGCTGTGTTGAGACTTTATTT  
TAAAAACAAATTATCTTGTGATTAGCAGTTCCAATTTAAAGAAGGTTGTAAAAAGGAGAGA  
AAAAAGAAGGAAGATATAAAATATATAAAAGAAAAGCCGTGATTTTTTCGGGTGATTCTTA  
TATGATCCCAAAATCCGATGAGACTTGAAAGTTAAAAATAGAAAAAGAATCTGTATAGTG  
ATGTACGAAACACCTTCGCTTTCTTTCTTTTGAGCAAAGTAGCAAAAGACCAATAAAAAACA  
GATTTTAAATCTCCAGTGCTGCTGCATATTGTATTACAGAGAGGGAGAGAGGGAGAGAAAAG  
AGAGAGAGAGAGATTGCGCACTTGCATTTTTGTACATATAGAATATTTCTGATTACAAGAT  
ATTTGAATCGTTTTCTATCGTTGATGATTGAGAAAGCATTATTTTTATATAGAGATTATTAT  
ATATAAAAAAAGAGAGATCCGAAAATTTTAAAGGAAAAGCCGAATTTTTTAATCCGAGAGC  
GGCGCCCCCATTTAAGGGGGGTGCTCTGACACACACCTCACACTTTCTCGGTTCTTTCTGTA  
AACAAAGAGAAAAAAGAAAAAAGAAAGACTGATGATACTTATGTGACACGATCCATTTTT  
CGGATTTAAATGAGAAGAAAAGTCGTCCTTTGAATATTACAAGATATTGGCATCGTTTGT  
AAACGGAACAGAAAATCCTTTCGTGAATTAAGAAAAAAGTAAAAAAGAA  
AAAAAAGAAAAAAGAAAATGGCGAAAGCCTGTTAAACTGTGATTTTTAGGAAGGAATT  
TCCGGTAAAAAAGCGTGTGTCTATCGGAAAATAATCGCATGTACGTTCCGGTGTGT  
GTAAACATTTCTTTTGTTACAAAATTTTAATAATTTTCGCTACTCGAGTCATTTGAAGAA  
AAGTAATTTTCGAGACCTGACTGCATCCTACCAAAATACCCTTTAAAGCCCCCTCTTTGAGG  
GGGGGGGTCTCATTACTCAAACAAAGAACCAATAACTAACATATATAATAATCCCGA  
AAAACGTTCTGAATCTTTACACCACTACGCAAAGCTGTGAACCATTGAAAAGAGAAAGA  
GGGGGTTTTACGGTGAAGAGAGATCGATTTTTAAAATTTTTTAAAATTCCTGTACGACAAAC  
AAGATAAAAAGAAAAAAATTAATTATGCAGCCGGCAAAGAACATGCTAAGGATAAACA  
GCAGCAGCAGCAGAAGCAGTAGTAGTAATAGTAGTAGTAATGGCAGAAACAGAAATC  
GGTTTTCGGGCCTTCTGGTGTTCAGTTCTTTCATTTCATTTCGTTAATTATTTCTGAAAAT  
TGATTTTTTTTTTATTATTATTATTTCGTTTCTTTAGTTATAATTGCTTTTAATTCAATGGTT  
AAATCGCTTCGTTATAATAATCTTGCGTTAGAACGTTGCATTGAAATTATTACTTTTCTATCA  
TAAAGTATTTTAAGATATTTTCTATTATAATTTTTTTAGTTAATTTTTTTTTTTTTTTTCATT  
TGGTCCAGTTTCCCTTTTCTTATCCTTGATAAGCACTTAGACACACACCCTCTTCATTTGTTT  
CTCTTTGTATTCTTTTACGAATGCGCTTTTTTCTTTCCAACCTCCTTTACACCCTTTCCTTACA  
TTCCTAACTAAATTTCTAGGTCTTGAAAATAATATCGATACAAATTGAAATTCGAAACACG  
AAATTTTTTTTTTTTTTTTCCATTTCGTTTTTTGTCTTAGACACGCGTATATATATACATACA  
TGTAATACGTTCCGTACTTATTGGACGACACCTATGACAAAAATCTATAAACAACAATAAA  
AAAAAAGGTTATCACTTTAGATTGTCTCAGCCTAAGTTAATCGATCATTAAATCCGC  
GAAATAGTGAACAAATATTTTCGCTCACTGTATTAAGAAAACTCCAATTGCACGATATTAT  
GAAAAATAGAAAAAATGGGCCAGTAAATGTTTAGCCTGCTCTATTTCGAATGTATTAATTT

ATCGAACGTATTTAGCTTGTGGCGATATAAAAAAAAAAAAAAAAAATATATTGTTACTTAAAA  
AGCTTTCTAAATAATTCCTCGAACTAAGAGTTACTAAGTTACAACGGTTACTTATAAAGCGC  
AAAGAAATGAAATAACTTGTATTTGCCGTAGAAGAAAGTAATTGGAGTAAGAAAGAAAAA  
TATAAGAGAAAAAGATAATCGAGTATATGCGGTGTAGTTTAAAAGTTCAGGCGTTTTATCC  
AGTTCGAATTGTCATAAATACCGATACGTAGTAACGACCAAAAAAAAAAAAAAAAAAATAA  
AAAAAAAAAACTTGATCTTCGAATAAGCTTTGTAATAAAAGTGTGTGTATATATTTATACAT  
AGTAATTTTTTAAAATTAATTTCTAGAAGTTTGCCTTTTTTTTTTTCTTTGCTATTTATTTCTC  
AATCTTGAGACTGTTCTTGATCGAATTTTTCCTTATATCTTTCTTTCTCGAGTTTGTTTTTC  
AACTCGTTTCAAGCAACTTTCCAAATTTAATTTAACGCTCGACAGTATTATTATTATTCGTTA  
TAATAATTCGTTTTCACTCGATTCCAAAAATCAATCTCGTTAATAATTAACTTTTTACAGTTA  
ACTTTTACAGTTTAAGACCAACAACGACTATCCCATCGCTTTCTTGCTTCCTTGACGAAAG  
TCGTGGGATAGTCGTTGTGAATATATTTGTGGTGCTATAATAATGATACAAGAATATTTAAG  
GTTCCGGTGAATTTCCAAAATCCAATCAAATAATAGCAATAAAAAAATTATAATAGAGCGTT  
AAATTCCAACAAATTTCAAGCACAGTGGGTGTTATAGCAAAGTTGCTCCAAGTCGTGTCGT  
TTATATATCATTCGCATATATCGAGCTTCGAAAAGCGCTCCTATATCTTCGAAATCTTTTACA  
AGAAGCTTCATCCAGGTTTAAGGAACCAAAATTGTCTTTTAGGCAACTTATAATATTAAGTA  
TCTTCCTTTGACGATAATAAGCGAAATCGAGGAATAACGATCAAAGTTTTCATTTTGTAAT  
CATTTGAACAAAGCACTTCACTCTCTCTCTTTTTTTTTTTGTATTATTTTTTTTTTTGGCCTA  
ATTCAATCAACACACCACATTAATTTTCAATTTTTTTTTTTTTTTTTTAAATTCTCCTCTTCTATA  
GGATTCCATACGTGGAATTCTATGGAAGACGAGAAATAATCTATCTTCCTTGCAACATACG  
CTTTTCAGCCTATGATGTAAAAGTAATATTTTCCAATACGAAATTCTTGAAGTGAGAAAAAC  
CTTAATCGAAGGCAAACCTCGGTGATTGATATCGAAAAGTCGTGATCATGATCGAAAGGTTT  
CCTATTATAATAATACAAAGTACAGTTTGAGATCATATTTGTACATCGCATTCAACTATAT  
AAAGGTTCCCTAAAGTTGTGTAGAGTGAAATCGTACGAGTAAACGTAAAATTGAAAATTG  
CGCGTTAATTATGCGCCTCGAACAACGATTTTGTGTATAACGACGTATATCTGAGATTGACA  
ATTTCCAGAGATCATCGAACGAGTCTCGAATGAATTGGAATGGAAAAATAATCGAGTAAC  
GATGAAACGTATCCTCCATATTCGACACACGCATAGGTTACTTGCTTAGCCCTAAGATTGAC  
GTTTCCGTCAATGGAAGGAAATTAATACTAACGCACAAGTTCGTTTGTTGCAAGCAAAATT  
TATATGAAAATAGTGATAGTATAATATACTCGTCAAGTTATCTGAGAAAGTGTGCCAATTA  
ATAAATTGTTCCGTTTTGAAGTATAAAGTATTAATAATTTAAATAAATCGCAAAACGATTATC  
CTGTAATTATCAGTTTTTTGGTGGTGACATAATATTAGGATATAATATCGATTATTAATATTT  
TTCGATTGACAATACCGAGTAATACTTAATTAACCGTAGTCTTCCAGGAGATCACATTTGA  
TCCGTATCCATAGTTATCACTCGAACCAACGGTACTCGTAACCATACTATTGTCCACCGA  
CAATTGGTGTGGTTCGATACCATCGAGTGATAACTATGGATATAGTTCCGCGATTCTCTATAA  
GCAATAGTATGTCAATACTACAAGCGAATTAATCGACTCTTGAAAGATGAAGAAACGACA  
ATACTAGAAACAGCAATATGTCTCCACTCCACTGATTGCGGAATTGATAGCGAAAAATTAA  
AAAAAATCAGAACCGAATCTATATCCACTTTCATCATTGGAATCATTCTTCTAATCGTCGCA  
CGAAGAAATAAATTATATGACAAGTCGAATAAAATCCAATAAGATCCAACAAGAATCTTG  
CAACTCATTGATACACATGCATGCATCATCCCTTAGGGCTTTGCAAGTCTCCGAAATT  
CAATTTGTGATAAGAAAAAAGGGCTAGTGATCAAGTTGCACGATTTTGTTTTTTCGCATGTT  
CGTTGAAACATCCGAGAAGATGATTGCCGGGGTAATTTTAACGTGTCTTTACCAACCTGGA  
AGTTGTCCTTATTGTCGAGTTGAATCGTGCTGGATCCGCTCGAGGGTTGACCTGTCACGTTA  
CTCCATGGACGGAATACCTATCGCGAAATATCGAGCGTAGAGGTCTATCGAAGTTGATAT

CGGAAAACCGTGATAACAAGTCGTCTCGATTCAAGTCCTCTGCCGAAGTGTTGGTCCATCAA  
TCGGGACACTGGACGTTTCGAAATCGTCCCACCAATCGCGAAATATCAGAGGCACGACCGA  
CATCTTAAATATTTCTTTTGTCTTCTCGTTAAAGAAGAAGGTAGATCGGAGGGGAAAAA  
AGGGTATACACGGTTCAGGAATACGAATTTGACTGATTCAACTGCATAAACGCGAGAAG  
CTTAAATAGGCGCACCTCGAAATGCGTCTTCAACGCCTACGGATGAGAGAGGAAAGAAG  
GAGAAATGAGATCCGAATTTTCGGATACTCCACAATGTTTACGTCACGTTTACTGACTACG  
TCCAGAAATATCATCCGATGAACGTATGTAAATGCGAGGAGGGGAAGATTTTCTAAGAATG  
CGTAATTCAAAGCTGTGATTCAAGTGTGGATAATTTTGGCATGTTGCACATGTGTAGGGA  
ACTTTCCGTTTGCTTTCCAAACCTCGAGGAGACATTGCATCGCTGTAAGTCTCTTTATCTAG  
AGAAATATTTTCTTTTAATAAAGCAAACCTTCATTAAAATTTTCGAGTTTTCCTTCGGGGAAG  
AATATATATTTACTAAAAAACCATAACACATACACATACACATAACAATATTAT  
TACATCCTGATAATTATTCAATGTCAGCCTTCAATGTTATACGTCATGATCATTGCTGCAATC  
GTTCACTTATCCTCCAAATGTCATTAGAAATGCGATTGTTCCGATCGTACCTGCTGGTGAG  
GAGTTCCATGCCTCTAACAAACGAACGTGTACATGACGATTAGAGGATAATTCATCCGAT  
TGTGCGTTAAACGTAGAGAGGGAGGAGATTGCCCTTTTGGATTTTTCACGTATACAAAGTAT  
ATCAACGTTTGAAGAATATTCAAATGTATTTTGGCAACATTCGAGAATTGTTTTCACGAAC  
TTCTCGTTGTTAACTTGCTTTTCGTTTCGAGACGAACTGAACAACCTTGATGAAAGAGATAAT  
CTTCCAATGTATTTATAACTCCCCGTAATTCCTCCCCTCGATATCGAGAAAGAATCTCCATG  
CCGAATGTAATGTATATTAACGTGCAGATTTTAAAAT

82. >MSTRG.1537.4 Gene=MSTRG.1537

CTCGTTGCTTTGTCGATCAATACTCGGTTTTGCTTATTATTTTCGAAAAAATATGGTAAATC  
GTAATGATCGTATCATTGAATAATAATTCATGACACAAGGAACACAATAATATTAATAATT  
GTCATATATATGATGGAAAAAGTATTGAAATTACAAGTTGAAAGATAATGCGCATTAGATG  
CCGGGTGCCGGTACAAGTTCTCGAACTTTCAGCACTGCGACGCCGCATGCCTATATAAGAG  
AGCCGGCCGGCTTGCTCGGCGCATTGTAACAACTTTCGTTTCGGTTTGGACGCGAGTGA  
ACACCCGAAGACCCACTAACCAGTGAATATACCTCTACTTCTTTACGTGGTCCACGAGGC  
TGCTGACAATACGACGTGAAAATGTAGACGAGACGGATTCCGGTGCGGAGCGCGACAGTTT  
ACCTGCACCCTGCGGGTTCGGTGCTTGAACAATCCGTACGCAACCATAATCTGATTAGAGA  
GTTTCGAAATTTCTTCACACATTTGAAGTATTTAAGAAAAGCACTTCGAGTTATATGCAGTAG  
TTTAGAGCAGATTCGTAGTTTGAAGTCGAATAAATCGTCGGCTTCGTCTTGTCGGAACGAAT  
ACTCTACCACAAGACATATGGAACCTTGGAGTCGAGAACGAAAAATAAAATCAAAACGG  
AACGGGAAATAAAAGAAAAAAGGAACGTAAAAAGGCTCGGAAAAAATAACGGATCA  
TTTTCTAGCGTCGAGCAGCATCGAGCGAGTCCTTTGCTCGGGACTCACCACAACCACCAC  
CACCACCACCACGAGCTCTTCTCTCCATCTTTTTACCTTTTTGGGTGCCGTGATAGTTAAAA  
CACCATCTGAAGATAGACTCGAGGTAATGTTGATCACGTCGTGAGATGGAGGCAAGACGT  
ATCTGCGTATGAATTGTCGGCTGACAAATCCGTGCTCGTCTTGTCTCTCCTCGTGTGTTGCTT  
CGACAATAACGTTATTACCGACCGTCTTCACCGTAATCTCTTCCGGTGAGAATTGTTGAACA  
TCCAGTATTACCTGGAAGTTGTCCTTATTGTGCGAGTTGAATCGTGCTGGATCCGCTCGAGGG  
TTGACCTGTCACGTTACTCCATGGACGGTAATACCTATCGCGAAATATCGAGCGTAGAGGT  
CTATCGAAGTTGATATCGGAAAACCGTGATAACAAGTCGTCTCGATTCAAGTCCTCTGCCGA  
AGTGTGGTCCATCAATCGGGACACTGGACGTTTCGAAATCGTCCCACCAATCGCGAAATAT  
CAGAGGCACGACCGACATCTGAAACAGTTTAAATATAGATATAAAAAAAAAAAAAAAAAA

AAATCGGTGAATATCGGTCAGTTCTTACTTTTTTCGATTCTTTTTTCGATAAGACGGTAGTATAA  
 ATGGATAAAAGTAAACGGAAAAGAATTAAGGAAAAGGAAGATGGAGACGTTATGTTAAG  
 TATTATTACCTAGTTGAACGTGTACTCACCACGATTTATAACACGCGAATGGAAGTTTGACA  
 AATTAAGTTAAGCTGTAAGCAATTTTTACTTAGGAACGTGCTAAGGAGATTCTTTTGAGC  
 TTAATCTTAATCCAATAAATCAATTTGCACGCCTGTCGTCACAGCTATTAAAGAACA  
 CGATTTAGATTTACTTTGGACAACGGTTGCAATTAGTAATAATCTTGATAATGAAACGCA

83. >MSTRG.1556.2 Gene=MSTRG.1556

CTCGAAAAATATGTCACGGTATGTGTTTCGAAACAACGAAAGAAAGTTTCTTCTTCTTAGATT  
 GTTCGTGCGATGCAGATCGTGAAGAGAAGAAAAGCGCCAGTCGGCAAAAACCTTAAACGAT  
 TACTTAGTATACCTTAGCGAACGTTTCTTTTCCCTTTGGGTGAACGTCCTCGTCATTCCCGTGA  
 TCGTGGAACGACTTGTTACCACGGTAACAACGATCTCTAGTGGCGTCTTCTCGTAAAGATC  
 TCCGGACTCGCGGGTACAACTTATCATTATTCCGAGCGATACGTTTAAGCGAAACTGTAG  
 TCGGCATTCCCGTTTCTTTTATGGGGTGGGATGCAATGGCACGGCCTAAAGGGAGTCTATC  
 CTTTTAATTCACGGCTGTAAATATATTAACGTTTGTGATAGAATCGTGTGTCTTACGTTA  
 GGTTTTACGAGAATGAAATTTCTTTTATCGTTGATTGTGATATGGATATATATATATATATGT  
 ATAGTATATATATGTACATTTTATCATCGTTACGATAAATTTTATATAAGATGGCACTATCGT  
 TTATTACATTGGCGATAATATAATTGACTAAAAAGAGTAAAGAAAACCTTGAAAATTGAACT  
 TTGGGAATTTAAGCTTATATTTATATTTTCGAGTTTCGTTTTTTTTCTTATTTAATTCGCTTTTA  
 AACCGTTCATTAACCAACCGTCCGTTCGTCCGTCCAAATGGACCAGGAAATTCGAAGATTA  
 ATACGATCCGAAAATTGTAAGGAGATAAGACGTTGTTTCGATTAACGATGGAAATCGATCAC  
 AAAGCTGTGAGTCCACATTCTTTTACACAACGACAGTGCAATAACATGCTAGAAAAATTTT  
 TTCACCCGCGTTTACGTCCGTCAACCGCAACGATGTTCTCTGACATTCTTCTCTTCATAACC  
 AGTCTGAACGCTTAGCTTTAATTAACGATCGGTGTTAAGTAACAACGAAGCGGTTGCTCGC  
 GGATCACTTAACGCGCTTG

84. >MSTRG.1599.1 Gene=MSTRG.1599

CATTTTTGAAAAATGTTTCATCTTTTGATGCGAAAAATTGAACCAGTGCTTGTTTCGACATCTT  
 CTTCATTTTTGAATTTTTTACGAGTCCCTAAAGCAGCGTGTGGTCTGGCGTTATCGTGGTGC  
 AGTATCATGTCCTTCCTATTGAACATTGCCGGCCTCTTTTTTTCGACCGCTGTCTTTAAATTAT  
 CCAGTTGCTGACAATACTTTCCGAATTGAGCTTTTCGTTTCGGTTTTAAAGCTCATAATGTA  
 TTGGTCTCGAATGTCCCACCATATACACAACATTCTCTTATTCCAGAGTCAAATTTGGTTTAG  
 AGGTGGAAGGGCTAGGTTTTCCGGGTTCACAATATGCCCTTTTCTTACAATGTTGTTGTATG  
 TAATCCACTTTTCATCCCCAGTTATCATCCGGTTCAAAAAGGGCTCGATTTTGTCCCAGGCC  
 AGCAGAGATGTGCATATGACAACTCCATCGTCCAAATTTTTCCGACTTAATTCATGTGGCAC  
 CCATCTTGAATACTTCCACACCAATCCTATCTTCCGAATATGGTCAGAAATGGTTCGTTGAG  
 CTGAATTAAGCCTTTCTGCGATCTCCGATGTTGTGCGAAAAGGATCTTGCTTCAACATTGCC  
 TTAACAGCATCGTCGTCGATCAAAGATGGTCCGCCAGAACGTGGCTTATCAGAAAG

85. >MSTRG.1603.3 Gene=MSTRG.1603

ACACGTTGCCGTTGTAAAGTATTGAGAATAGAATACAATCACGATCTAACAAAGAGTGTCA  
 CAAAGTATTTGCTTGAGGGACATCGAAAAGAAGTAAAACCACGAGAGTCATGGAACCTGGA  
 GCCTATGTGTATCGTGAAAATGAGACGTATTACCGATTATATCGTTTGGGCACCGGTATCG

AGCACGACGTCCCTGAACTCAGCATTTTAACTCGTCAACTGCGCAGTTGACACAGCTCACA  
 CGTCGCGTAGCACCGGAGGGATCTCGCGGTGATCGGAAAGAGGGGGGTAAGAGGGGACG  
 CAAGCCTGGAAGGAAGGCGTCCGACAAGACGGACATGAAAGCCAAGCTTGAACGAAGTC  
 GACAGAGTGCAGAGGGAGTGTCGTGCTCGCAAGAAGCTAAGGTATCAATATCTCGAGGAGT  
 TGGTAGCCGACCGCGAAAAGGCTGTGCTCGCACTTCGAAGGGAGTTGGAGATGTATCGGC  
 AGTGGGGACAAGAATTGGACGCCGGACGAGTTCCCGAAGGGCTACAAGCGATGCTGGAGG  
 AGCTCGGCTCTCTGAAGCGGGAGAAAGTGACCAACTAACCGAGCGAGGAAGAGAGAAAG  
 AGAAACACGAGTTTCACGAACATCGAGCTTTTTTCGCCACATTTTCTTTTTCTTTTTTTTTT  
 TTTCTTTTTCCGCGATATCCGATTTGATAATCGAACGTCAATTCCTCTGATTTCCCGATTATT  
 ATATTATTATATTTCTTCGAAGGGCGTGTCGAGGATTCAACTCGAAGAATTCGGATGCCTC  
 TTCTTCTCGTTCACGGTGGAAAAAACCGTTGAAAAACAAAGGAAAATGGATGGAAAAAGA  
 AATATCATCCACCTTACGGATTGCTGTCCCGCTTTTTAGCTCTAGTCTCTTCTCTCGTCTCG  
 TCCAATCCTCGAAGAAGAAAAATTCGTTCCGGTGTGTTGTTTCTCTAGTTATTATTACTA  
 TTATAACGTTTAAACGTTTTATCCTTGACGCCTCACGAAAGAAAAT

86. >MSTRG.1638.1 Gene=MSTRG.1638

TTCTCATCTCTTCTGCATCAGTCTTCAACTCTTTCCTCCGCGATAACTTGGTGTAACGATA  
 AAATTTAACGAGCAACAATCCATCAAAATCGTTCGTAATTTACGTGTGACGGGATGGCGCC  
 GTTACGTCTCATTTTATTCGTCTTGTTTTGTGCATTTTCGTACCATGCACGAATCCAGACCT  
 CTGACATTTCCACAAAGGAAGAACACAACCGCGAAGAAATGCCCGCCAGGATACAGATAC  
 ATTCGCAACGTGGGATGCAGGAGGCTCATATTCGCTCAAACGTAAAACGTAAAATCCGGAT  
 AATAAGAACTTTTGCAAAGTTTTCTGAAAGTGACTGAATTGCACTAAACAGAACTAATC  
 AAAACATCTATTCTTTATATCGTATATATTCGGATATCTAATTTATAATTTAACAGTGACAAT  
 GAAATAAATAACAATTTATCGAT

87. >MSTRG.1740.3 Gene=MSTRG.1740

AATACGTCAGTAGAATTTAATCGCCCGTAGTAACAAAAAGGTTAAGTCGCGATGACTGCTG  
 TAATAGTTTCCAGTCCCGTGCAACGATTTTCGAGCGACACGCCGCGCGAGAAATTATTCGTT  
 GGGAGAGAACGCGAAAAGATTTCGAAGCCGGAATTTTAATTTTCGAGAGACATCAGTGCA  
 CGGAATAAGTTGGACGAGTTCGACGAGTCAGAAAAATCGATATTCATCCGACCGAAATAA  
 ATCCGATTTACGTAATAAAAATTTGAAAAAAGAAGCACACCTAATAGCAATAATAATATAT  
 AATAAGACTCGTATCGAGGGGAAAGAAACAGATGCGCGAAAGTTGAAGCGACGATTTTCGA  
 CGTGGATTCAAACGCTGGTGAAGTAGACGACTAATTCGATCGAGAGGAGGGGGCTTCTCGTT  
 ATTATCTCGGAGAGGGGATCGATCGAAGGTGGGATGGATTCGGGTGGAGGACAAGACGAT  
 ACTGTCGTTGGGCCAGCGAACGGTGACTCACTCGCCCCGATTCTTGGTCACGTTGGAGAGC  
 GCCAAGTCGAAGAATCAAAGCGAGTGGAGGGACGAGGAGGAGGCCACCTCGCGGCTTCA  
 CATCCGCCAACTTCGGGAAGCCGACCGGGGATGCTACATGTGCCAGCTGAACACGAAGCC  
 CATGTTGAGCCAGCTGGGATGCGTGGATGTCCTAGGTATGCCTAATTGCGCGTTATACCGCA  
 TTCTACGGCCAGATACAGTCGGGTGTTTGCGGTGCTCGTGTGCACACACGTACGTACGC  
 ACGCACCGGTTTCGATTAGCCTATCTCAGAGAAGGGATGGAAAATATGCGCGCCTCGCCGC  
 TAGAATACGTTTCAATGGGACCCCTGTACCACCATGCCTCACCCGTGTTGCTCGCCCGCCTC  
 GCCTCTATTGTTTTCCACCATCCTCCGATTCTACTTCCCTCCGACTTCCCCCCCCCCCC



88. >MSTRG.1740.4 Gene=MSTRG.1740

AATACGTCAGTAGAATTTAATCGCCCGTAGTAACAAAAAGGTGGGATGGATTCTGGGTGGA  
GGACAAGACGATACTGTCGTTGGGCCAGCGAACGGTGACTCACTCGCCCCGATTCTTGGTC  
ACGTTGGAGAGCGCCAAGTCGAAGAATCAAAGCGAGTGGAGGGACGAGGAGGAGGCCAC  
CTCGCGGCTTCACATCCGCCAACTTCGGGAAGCCGACCGGGGATGCTACATGTGCCAGCTG  
AACACGAAGCCCATGTTGAGCCAGCTGGGATGCGTGGATGTCCTAGGT

89. >MSTRG.1753.1 Gene=MSTRG.1753

TATCGCTGAGACGAACGTGTCGTGTGCCGTCGCTATCGCCACCGTGGTTCGTTGTCATTATCG  
TAACCGTATTCCTTCAAGTAAATTTTGAGAATTCAACACGCGAATCTTGGTCAGTTTCTCTTT  
ATCGGTTAAAGAGTGCAAACCTTTGATGAAATTCTCTTTAAGATATTCGCGTTGAGTTTAATT  
CGATCGAAATAACGCCCGAGCTCCCGGTCGTGGAACACAATCGTGGTGAGAAGGAAGTAT  
ACGCGTAACAGGGGCTACGGCTACGCGTAACAGCGAACTGGAACGGTGGAGTTTGACAAA  
AGTTTGTGTTACGGCCATGCTTGAAACGGCAAAACCTTCGCGAGTGTGAGCAAGAGGGAA  
AGAGGAAAGACAAATTAAGAAAAGTATAAATAAAGAAGAAAGAAAGAGGATAGGAAA  
AGGGAAAGAAAGAGTGAAAGGGTGTATGTGAGTGTGTGCTAAGAGAAAGAGAGAGGGGA  
GGGCGAAAGAGAAAGAAAGAGTGCGAGAGAGAGAAGGAGGAAGAGAGAGAGAGAGAG  
AGGGAGAGAGAGGGAGAGAGAGAAAGAGAGAAAGGAAAAAGAAAAGGGAATAAAGAGAA  
ACCCGGAAGAGAGAGAAAAGTGATCCGAAATATCATTGACGGGACAAGACGAAGCAATCAG  
AATCGTCGATCCGTTTAAAGAGAGAAATCGTCGAGAAGATTCGCGAGGGTGCGAGCTGACG  
ATAACCGTAGTATGAGAGAAGAGCGGCACGCAGCGAGAAGGTCACGGAGGGAGGTTGGA  
AAGAGCTCAGTGCCGTAGCATGCCGGCGAGCTGCAGCGGGTGGTGGGGCGTCTCTGAGAG  
AGAGCGTCGATCGGCGTCGTCAGGCGTCTACTCGGGCGTCTGCGTGGTTCGAGCAGCGGAAG  
GGTGCCTACGCGAGTATAACAGGAGGCGGAGGAGGAGGAG

90. >MSTRG.1762.1 Gene=MSTRG.1762

TCTATCTTATATTTTGTGTTATGACTATAATATTTCTGAAATCGTTGAATATTGAATCACAGTG  
CAGACAACCTTTTTGTGTTCAACGTAGGACATGAACGACGCTTCACATCATTACAATGTAA  
AGATTACGGAATATTAATTTAAATCAATTCTTAAACGACATGAAATGTCATGTAATTAA  
TATTAATTTATAAATTATGTTAATATTTATATATTTTATTTTCCACATCTTTGTAATTTAGAAA  
CATAATGGATCAAGAACTTATTGAAAAATTTATAGAAGTGACGGGGGAAAGTGAGGCAAC  
AGCTCGTCAATATTTATCATTAGCTGATGGAAATGTAGAACTGCAATAAGTTTAATGTTTG  
ATGGTAGCCAAGCACCAGAACCATTATGTACACCTGATCCAGAACCAGAAGTGAGACCTC  
CTATTTTACCTATGCAGGAAGTATTAGTGCCATCTGGTCCAATATGTTCTCTTCCAAGATTGT  
CCACTAATGTATTTGACAGATTCAGAGATTTTGCCGTAGAGACTCAACGGCAAGAAGAAGA  
AATGGCCCGAAAAGTAGCTGGAGTTAAACAAATATCTTATTGCAAATCAAAAAGATTGGA  
AGATTTATTTTCGTCCACCATGTGATATTCTCTTTTTGGGTTCTTTTATGGAAGCCCGTGAACA  
TGCCAAATCATTAATCGTTGGTTACTTGTAATATTCAAATTTCTCAAGAATTTTCTTGTC  
AATCCTTAATAGAGATGTATGGTCCAATCAACAAATTCAAGAAATTGTAAAGGATCATTTT  
GTTTTGTGGCAAGTTTTGTCAAATACAAGTGATGGAAATCGCTACGTACATTTATATGATGT  
ATATGAATATCCTTATTTAGCAGTAATAGATCCTAGAACAGGAGAATGTATGAAAATTAC  
AATCATATTACTGTAGATATTTAATATCTGCTTTAAATGATATGTTAAGTTCTCATCCATCC

CCGGAATGTGTATCAAGTGATTCAGTTCATTCTAAAGAATGGAATACTTGCACTGCCACAA  
CAAC

91. >MSTRG.1765.1 Gene=MSTRG.1765

ACAAGTTTACGATTGAAACATTGATCGATATATAATAATCGTCAAGCGATAATAACGCGCT  
CTATGATCGGAAGGAAAAATCACGAAAGTCGATCGATACATCGAAAGGTGAGAGGGATAT  
GATATGCGTTCGACGATATTGCGAAAAATTTGGAAATATTTTCAGTTCGTGGTGTAAACAA  
ATGCGATGTCGTTTTTCGACCGCTGCATCGTATACACATAAGTATATGCGTGTGTTATACAG  
TGTATGATACGTTACGTCAAAACAATAACACGTGTACGCGTGGGCACATGATTAATTGAAA  
ACTTTATATGTTTAATGCGAATCTAGTCAATTCGATTTCGTTGAATCGTGGCGGTTTATCGCAA  
TCGACCGAGTAATTTTGCACGCGGTTTAAATTGAAAAAGAAAATAATAAATGGAATGGAT  
CGTGATTAATAATTAGTCGATCGTGGATAAAGCATTTTAAATTAAATTCCAAAATATTAATTG  
TAATCGTGCGAAACGCTTCTAAATTCTATGCGTTACTTTTTATTTTTTTTTTTTTTCTTCTTCTT  
TCGTTGTACGAATTGTTAGAAAAACAATTTGCTCGATTCCGTTCCGTCGGAAGAAGATGTT  
CCATCTGACGGACGAAGAAGCGACGACGAATCATAACCTATACGGTACAGTACAGTGTAG  
TGTAGCGACTTATATAGAGATATATGCATCGAACAATAAACGCTCACGATCGGCGATCATC  
TTTTTGAAATTTTAGTCGTCTTAAGCTCCTACATCTACGTATATGTAAGTACAGTACAGTATT  
CCGTTGCGTGTACACGTGATTGTGCCACAGGATGGAAACGACTCGACGCGACTAAAATGAT  
TTTTACCGGAATACCGTATTCGATCGCATCGTATTTTTATCGACGTATATACGGAACGAATG  
ATTCAAGATCGATCGACCAGGCGCTTCCATTAGATTGTTTTCTTAATTTTCTTCTAATTCTGA  
AGAACTTGTATATTGGAATAATGAAAATGGGTTGGAAAAATCGATCTTGATTGTATGATT  
CGAAATGGAAAGAGGGATCGAGAGAAATGGCGGGAGGGAGGAGGGAGGGGGAAGAGAG  
AAGTGGGCCCGGATAAAATCTCGATAGTCGATTGATAGACATCCTCGCTTTCGTACCTC  
GCACTCGCTACAGCCATAGCCATAACCGTTCTCGTTGCAATTTCTTTATCGGTTAATGCGTAT  
CGGTTAATCGTTGACTATTGACTATACGTGTTGTGAAATATCATATGCGTTACCGTGATTTT  
TATAGTTATCGCGTTATGTTGTTTCTCGTTTAATTGTACATTTTCATTGCTGCATTTTCGAGCAAT  
CGAGAATTACAGTGTTTATCGATACACGATCACGAACAGTCGATATAGATGTATGCTATAA  
CCGACATCTTCTTTTTGTGCTATTTCATCAACGCTGTAAATACGCATCTAGCATGATTACA  
TGCAAAGAAATAAATATATGCACGCGTACGTATACTCGAACGTTACCATACATAACAAATA  
CATGTATATATATATATATGTACATACACACACATATATATATATATACATATATGTATAAG  
TATATACACACGTGTACGCGTCGCGTGCCTATACTTATAGAGGATACACATACAAAGTATA  
AATATTATATATTGACTTATCTAACGATAAGCGAGAAACATTTATCGAGTAATCACATAGG  
ATGTGTTGAAACATTTAAATGATGCACAGGGTATAGATGAGAAAAAATCGTTGATATAAT  
AACTGATGTCTATATAATGAATGTTTCTTTGTTCTATCGGCCTCAAGGACACACAAAGCGC  
GTACGATCGACAATTAATCTATGGTAGATGTTTTTCAGAAATTCATTCCGATTCGAAAAAAA  
AAAGGACGGTCTAGTATAAGTGTCGTCGGTGTTAATCGTTCGTCGATAATGGAGAAAAAAA  
AAAAAAAAAAAAAGGAAAAAAAAAAAAAAGAAAAAAAAAAA

92. >MSTRG.1766.3 Gene=MSTRG.1766

CCGTGCTGTTGGCGAGAAGGTCGTTGTTGTTGTTGTTATTGTTATTGTTATTGCTGACCG  
AGCGCGACCGAGTCGTTTCGACACGAGCCGTGGGACAAAGTCGGACGACTGAACGAGGAG  
GACAGCAGATCGGCGGAACGGTTTTGCTTCTTCGGCCGGCCGAGTTTTCTTCTTGCGAGATCT  
CCAAAATTGATCCACAGTGATCGTTGAATCGTTCGCGTACACCTTCCTCCCCACTTTCTTCCC

93. >MSTRG.1793.3 Gene=MSTRG.1793

59

CCTGATTACCGAGCGGCAATACCGTGGGACCGTGTGGATACGAGGCCAGATGAGGATGCT  
 GCGGCTTTGGATGATGCACCGTCGGGCCGGGTGGTGCGCTCTGCACTATCATCGGCGCGGA  
 TGTCGGCGCACCTTCCACCGAATTTCTACCGAGAACGTTTCCGTCTCCAGCGCTGATCGTTC  
 CGTTACCGCGAAACGATTTCGTGAAGGTATTGCCGCACTTGATTCTTCTGCTTTTGAACGACA  
 TGGTAGCGCGTCGGATTTTCCAGTAATGTCCGTACCTGTATCGAACAAAAATTATATGGCTT  
 TCATCCATCTCTTTCTTTATCTTATTTATAACGTGGTCTTTAGATCGATATTTTTCGCGAAAAA  
 GAAAAACACACCACAGTTTTGTGTTACTTTTAAAAGTTTATGTATAAACCGTTCTCGTATA  
 TATATATTTGGTAAGAAAGTAGTATCTAAAAAGAAGAGATAAATACGCATAAAGATAATT  
 GGATGTATCGTTACATTTGTATGTACATGAAAAATATTTGTGTGAGGACAAAAAAGATGGA  
 GAACGAGAAACGGCAATAAAAGAAAAAGGATGCGCGATAACGAGATATGAAATGAACGT  
 ACTTGCAAGACTTGTGGTGGTACGTCTACACCGATAGTCGAGAGTGAGGTAGAAGGTACTG  
 GCCTGGGAGGAGCAGCCGTTGGTCTCTGTTGCTGTAAATTTTGACGAAATTCAGCTTCTCGC  
 CTTTCCTGCTCTTGCAGCTGTTCTCGCATCAGCTGAAGTTTCAGTTGCGTACGCGAGGTGGGT  
 GTTGCAGTCTTAAACGTAGGTGGACTGTCAATATTCGGGGCTCGGCTCTTTAATTCATAATA  
 CATGATGTCTTGTAGCGGTGTCGACAAAAAGGATAAAGCCTGTTCCCAATCATCATTGTGGT  
 TATTCTTATCTTCGTTTTCTAGTTTATTGCCACAACACGATTCATCGATACCGGTTATCCCATT  
 TTGTTTGTCTGACATCGACGATTGCACAAATCCGCTTCGCGATGTTCCAAATCAGCGGTAA  
 TAGCTGCCAGATCGAAA

94. >MSTRG.1801.6 Gene=MSTRG.1801

GCTTTGCTTCACACGCATTACGTACCGAATCTTAATCACGATCACGATGAAATTCTCGAGAA  
 TTTGACGCGATACTGCGGAAAATCAGTTTATAATTATACCGAAGGCGATTATCCCCTTAAAT  
 GGGATTTTTATAATAGTTTTTATTTTCGCTTATACCGTCGTCAGCACAATAGGTACGTACGTAC  
 TAATAAATTCTCAAAATATCGTATTAATCATATCTAATAATTACGATTTAATTACGATTTATA  
 TCACGTATGAATTGTAACGAAAAATTTATAATTTTCATTGTTAATCGTGTATCGAATACAC  
 ACGATATAATACACGTAGGTTACGGGAATTTGGCTCCAACGAACAGGCTCAGTCGCATCCT  
 GATGATATTTTATGGTCTGATAGGCATACCTATGAATGGAATTTTGTGACACAATTGGGAG  
 AATTTTTTGGCCGTGTATTTCGTTAAAGCTCATCAAAAATATAAATCTTATAAGCATGGCCGT  
 GACAATTATTATCCTAGAAAATTAACAACATTCGAAACGGGAAAAGCTGGATTGGCTGCAC  
 AAATATTTGCACACTTGTGTCAGGTTTCGTCATGTTTCATCTTTTTCCCAGCATTCTTTTTCTC  
 TCATTACGAGGGTTGGAGTTACGAAGAAGCTGTTTATTACGCTTTCGTCACATTGACCACCA  
 TTGGTTTTGGAGATTACGTGGCAGGACAGGACAATAGCAAGGGTAGCGGGTTTTTCTTTATA  
 TTATAACAAGATCTTCTGATTTGCTGGATTCCTTTGGATTGGGATACACTGTCATGATCATG  
 ACATTCATCACGCGAGG

95. >MSTRG.1805.50 Gene=MSTRG.1805

ATATATATAATATAAATTTAATGCATAATTTCAAAAGATTGGTGGAAATGGACAATGTGTA  
 AATATTCGACAATGTGGAAATTATAATGGTCTAATCTCGTGGTTTATGTTCTAAAAACTGTA  
 AATACTGTGATGGAATATTTAAAGAACTTGGTGAGAAAAGAAAATTGTTCAATTGCCATTA  
 ATAAATTTTTAATAATTTGTAATGAAATGACAACACTCGTTTCATTAGAATCCATTGTGCAT  
 TGTGTTTTCATGTGAAAATGGTAAAGGAAGTTTTGACTCTAGTCTTCTTAAATATGAAAAAA  
 TTCATCCAATATACCTGTCATTGCCAACGTACACAGGCAGCCATAAGATGTTATGCAGATG  
 CACGACCATTAACTTTAAAGCTATTCTATTTTATCATCTTTAAACGTATGAAACGAAGCAAG

AAATTTGGTTACCAGATATAGGAACTTTTGATCCTTCGAAGAATTTAAAGTTGTGAATATTA  
 ATTTAGATAAAAAATGATTTGAGCATATCAAAAGAACATTAAACATTAAACGTATTACGTAACA  
 GGATGAACAAGATAAAAATAGTAAGCATTGATTTTCGATAATCTAATTACGGATGATGGAGAT  
 ACACATTTTCGAGATGGTACTTTAACAATTGAAAGTTTAGATGGAAATAAATTATATTTAGAT  
 TCAACGACTCAATTTAGAATGTGTGGAAATGGACAATGTGTAAATATTTCGACAATGTGGAA  
 ATTATAATGGTCTAATCTCGTGGTTTATGTTCTAAAAACTGTAAATACTGTGATGGAATATTT  
 AAAGAACTTGGTGAGAAAAGAAAATTGTTCAATTGCCATTAAATAAATTTTAATAATTTGTA  
 ATGAAATGACAACACTCGTTTCATTAGAATCCATTGTGCATTGTGTTTTCATGTGAAAATGG  
 TAAAGGAAGTTTGTACTCTAGTCTTCTTAAATATGAAAAAATTCATCCAATATACCTGTCAT  
 TGCCAACGTACACAGGCAGCCATAAGATGTTATGCAGATGCACGACCATTAACTTTAAAGC  
 TATTCTATTTTATCATCTTTAAACGTATGAAACGAAGCAAGAAATTTGGTTACCAGATATAG  
 GAACTTTTGATCCTTCGAAGAATTTAAAGTTGTGAATATTAATTTAGATAAAAAATGATTTGA  
 GCATATCAAAAGAACATTAAACATTAAACGTATTACGTAACAGGATGAACAAGATAAAAATAG  
 TAAGCATTGATTTTCGATAATCTAATTACGGATGATGGAGATACACATTTTCGAGATGGTACTT  
 TAACAATTGAAAGTTTAGATGGAAATAAATTATATTTAGATTCAACGACTCAATTTAGAAT  
 GTGTGGAAATGGACAATGTGTAAATATTTCGACAATGTGGAAATTATAATGGTCTAATCTCG  
 TGGTTTATGTTCTAAAAACTGTAAATACTGTGATGGAATATTTAAAGAACTTGAATCCATTG  
 TGCATTGTGTTTTCATGTGAAAATGGTAAAGGAAGTTTGTACTCTAGTCTTCTTAAATATGA  
 AAAAATTCATCCAATATACCTGTCATTGCCAACGTACACAGGCAGCCATAAGATGTTATGC  
 AGATGCACGACCATTAACTTTAAAGCTATTCTATTTTATCATCTTTAAACGTATGAAACGAA  
 GCAGAAAATTTGGTTACCAGATATAGGAACTTTTGATCCTTCGAAGAATTTAAAGTTGTGA  
 ATATTAATTTAGATAAAAAATGATTTGAGCATATCAAAAGAACATTATCATTAAACGTATTAC  
 GTAACAGGATGAACAAGATAAAGTAGTAAGCATTGATTTTCGATAATCTAATTACGGATGAT  
 GGAGATACACATTTTCGAGATGGTACTTTAACAATTGAAAGTTTAGATGGAAATAAATTATA  
 TTTAGATTCAACGACTCAATTTAGAATGTGTGGAAATGGACAATGTGTAAATATTTCGACAA  
 TGTGGAAATTATAATGGTCTAATCTCGTGGTTTATGTTCTAAAAACTGTAAATACTGTGATG  
 GAATATTTAAAGAACTTGAATCCATTGTGCATTGTGTTTTCATGTGAAAATGGTAAAGGAAG  
 TTTTGTACTCTAGTCTTCTTAAATATGAAAAAATTCATCCAATATACCTGTCATTGCCAACGT  
 ACACAGGCAGCCATAAGATGTTATGCAGATGCACGACCATTAACTTTAAAGCTATTCTATTT  
 TATCATCTTTAAACGTATGAAACGAAGCAGAAAATTTGGTTACCAGATATAGGAACTTTTG  
 ATCCTTCGAAGAATTTAAAGTTGTGAATATTAATTTAGATAAAAAATGATTTGAGCATATCAA  
 AAGAACATTAAACATTAAACGTATTACGTAACAGGATGAACAAGATAAAAATAGTAAGCATTG  
 ATTTCTATAATCTAATTACGGATGATGGAGATACACATTTTCGAGATGGTACTTTAACAATTG  
 AAAGTTTAGATGGAAATAAATTATATTTAGATTCAACGACTCAATTTAGAATGTGTATGTAT  
 ACAATTTTACCACATAGTATCGTTGAAAATTTTGAATCGGATGTGATCGTTCCTTATTAGAG  
 GAGAATATGATATCTCTCTAATATATTTTTATATATTTAAAAATATATTCAATGATAGGCAAT  
 GATAGAGATTGGCATGGTGAAATTAGATAGAAGTTTGAAAATGATAAGCGATATGTAATTG  
 AACAAACGAATCATAGAAAAAAATTGAAGATAAATTTATGATTAAATTTATGAAAATAAA  
 TATAAATCTGATGATATCTTCGTTAATAGTATT

96. >MSTRG.1806.30 Gene=MSTRG.1806

TGTTATAGAAGAGCTAAAATAGGTTATTTAATTTAAATATCGTTTTCTGCCGTCACGTTTAAT  
 CACGTTATTTTCTAGTAGATATTCTGTGAATTTTTATTTTGTAATCATATTTCGCATATATATA

TATATTTAAAGTATAATTTATAAAAATATAATATATATAATATAAAATTTAATGCATAATTTCT  
AAAAGATTGGTGGAAATGGACAATGTGTAAATATTCGACAATGTGGAAATTATAATGGTCT  
AATCTCGTGGTTTATGTTCTAAAAACTGTAAATACTGTGATGGAATATTTAAAGAACTTGAA  
TCCATTGTGCATTGTGTTTTTCATGTGAAAATGGTAAAGGAAGTTTTGACTCTAGTCTTCTTAA  
ATATGAAAAAATTCATCCAATATACCTGTCATTGCCAACGTACACAGGCAGCCATAAGATG  
TTATGCAGATGCACGACCATTAACTTTAAAGCTATTCTATTTTATCATCTTTAAACGTATGAA  
ACGAAGCAAGAAATTTGGTTACCAGATATAGGAACTTTTGATCCTTCGAAGAATTTAAAGT  
TGTGAATATTAATTTAGATAAAAATGATTTGAGCATATCAAAGAACATTAAACATTAAACGT  
ATTACGTAACAGGATGAACAAGATAAAAATAGTAAGCATTGATTTGATAATCTAATTACGG  
ATGATGGAGATACACATTTGAGATGGTACTTTAACAATTGAAAGTTTAGATGGAAATAAA  
TTATATTTAGATTCAACGACTCAAT

97. >MSTRG.1842.2 Gene=MSTRG.1842

ATATTCTATTATTCATTTAAATATATAAAAATATTGAAATAATTATACAAAAGATATTCAAAT  
CAGAATATTTTGATTTATTTATTATTATTAATAATTATTATTATTATCATTATCATTTTTATCTT  
TCTTTATATTTTATCCCCTCTCTAAACATTTCTGATTCATTTATAGATGACTTCATAGTTAAT  
TTATTTTAGCCTTTTGAAAAATTTAAAATGAATATTGAAAGTTCTAATAGTATTCAATTCTGAT  
ATAAATGCAGAACTTATGATATCCCAATGAATATACTTATTCGACCTATTCCTCCAATTAT  
TAATGAAAAAAAGGTTCAAAGTTTAATAAGTACATTAAGCAATCCTGAAACAGAAACATTT  
GTACCACCAATCGATGTTTTATGGATTAAAGGAAGCGAAGGCGGTGATTATTATTATTCTTT  
TGGCGGATGTCACAGATACACAGCTCATCAAAGACTTGGAATAATCATTTATAAAAGCTAAA  
TTAATACAATCTACAATAACAGATTTAAAAACTTATCTAGGAGGTTCTATGCCAA

98. >MSTRG.1877.2 Gene=MSTRG.1877

GTTCTTGCCCGTTTTTCGCTCGGGTGACGATCGATCGGCGATTCAACGCTCCGTGACCTTGTTT  
CCGCGCATCCCTTTCCGCGACACGATTTCCGGAGAGATTAAACGATCGCCTCTCGGAAGAG  
AGAAAACCAACCGGCTCTGTGCGGTGGTTAAACAGAGACGGACGGTTTCGTGATTCCTTCTCT  
TTTTTTTTTTTTCTTTCTGTGAAGTGCAGTTGTGTTTCGCGCCAATCCAATTCCAATTGTTGAA  
AAGTGTCACCTCGGATTCTGGCTTCTTCTTTCTTTTTCACGAGGATGAACGATTCAACGA  
TCTCCGTTGGAATTTTATATCGCTTCTTAGACGAACGGTGAACCAGATTCTTCGCGGACATC  
GCTTATCTCTTGAGGGTTTTCGCTATCTGTCAAACCGTGCCCTCTCCATCCACAAGGACGA  
TCAGCCTCAGTTATCCCGTCCACGAGTCGTGAACCACGATACGAGAGAGAATCGACAGTTT  
CAGCGAGGATGTCCCTGCACGAGGCGCGTTTACAAGCCCTCCTCTCTTAACATCTCGTTCCCT  
GCTGCCATCGACACGATCCTGCGAGGTGTTGGCTCGAGGCAGGGATCGGCTTACGGGGGTG  
GAGGCGCTATAAAAATAAAGGAAATGGGGGTGCCGGATGTAGAGCAGGCCAAGAGGCGA  
CTCCAGGACATTCTGAGGAAAGCGCAGAAGCTCGAGATCCCCCGCAAGAAGTGATCTCG  
ACGCGGACCGCCCAGAAGCTTCTTGCGAGGACGAAGAACGTCCTGGCATGGACGATCTGG  
ATCACTGTTTTTATCCTCCTGCTAAGCGGAGTGGTCTACGCCCCTTGCCCAACGAGGCAAGA  
AGTCGAGACCATTAGAAGTGTCTCAGGCGAACGTGCTCGGGAGCAGCGTCTGGGGACTTT  
TCGGAGCGCGTGGCCGCCCTTTTAACTCCTCCTCCACCCAGGACGACTGCTAGTCTTCGTC  
GAGGTTCTCCAAGTTGTTCCACCTTCTCCAACGAGCGAACAGACCGAAAATGGGAATGC  
CAAACAGAGGATATCGATCCTGTGATCCACGCTCGTTCCCCAAAGCCTTATACTTTGGCTTC  
GAAATTAAGCGTTAATTGTGTTAATCGCTTGGAACGATTTTCGTCGATCTGAGAAAGAATT  
GTATAATATAATCGAGTGGGTG

99. >MSTRG.1883.1 Gene=MSTRG.1883

GGATCAACTCTTGTCTCTCGGATCATTCTCTTCGGCGGAGCGCTCAGTGCGCTGCAAGCGC  
TTCGAGGTTGCGTGTCTGGCTTTGTCTGCTTTTCGCGGGAAGGGAAGAATTTAAATCGTCGATC  
GGACGAGTGATCAGTGCGAAGAGATTATTTCTTACGCGAGGATTACGTGAAAAAAGGA  
GAATTCGCGAAAAAGTTTATTTGGATTTGTTCTGGCTAAAAAAGGAAACGAACGCTCGGG  
TGAAATTCTGAAAACGGAGCCAAGTGATATCGACGGGAGTGTCGTCTGACGTAATTTTAGAA  
CGTTTCAAATAAGGTGCCAATAAGATAAAAAAGAGAAGATCACGGCGGATTTGAAAAGT  
GTAAACGAAGAATTGGAGGAGAAACAAGAGGGATAAAAGAAGATACGTGAAAGATACGT  
TTTGTGATGAAAAAATTATCGTCGTCTCTCTGAATGGTCGAAAATTTATTTTCGCATAAT  
TTAACGATTAATAATTCCTGTCTCCTTTCTTGTCTGAGTCTTCTTCATTCTCTTTGGGATATGTT  
TGAATAGACAAAAAAGAAGTTGTGTCTCAGGATCAAGTATAAAAGGCTCGGGCCTCTTAAC  
AAACTGTTGACCCGAAAAAGCGTTTTCTCTGTTAACTTAGCCCATCTCTCTCGAATGATAT  
ATATATTTAAATTCCTCTTCATCCAGATCAGATTGATGCGTCGACATTTTTTAATATCTATCC  
CCCCCCCCCTTCCACGAATCGTTTATTCAAATTTGGTTTTCCCATTTATCCACTCAAGTCT  
CATCCTCGGTGAATATTAATCCGGTTAATTCTAACGAAAAAATATCTGTGCAAGGAAAAGT  
TTAATATCACGTTTCCGACATTTAGAGGATCGCGTCAAATTTTATCAATTTCTTGAAAAAG  
GAAAAGGATGCGTTAATTAAAATTTGATAAACTGTATCGGCAGCAAAGAGGCAAGAAAGA  
TAATTAATGGAAGGATTGATTTTCTTGCTAGGCTTCAAGTAACAAAGTTTCTCCTCGAAGGG  
GAGAAACAAATAAATAAATTGCGAGGAATTATGCGAAATTAGCTTCATCCGAATGAAATT  
ATGCATTTGAATCGGAGATAAGATGAAGAAGAACTTTCAAATTATTCTATTATTTCTTCAT  
CTTCGAATGAAATCACGGGAAAGACTACTTCTCGAGATCGTCAAATTTATTAATTTTCGAT  
AAATTATTGAAGAATAATTTTAATTCAAATTTAAAAATAAATGATAAATAAAGAAGAGATA  
CTTTTGAATAAGAGAATATTAATTACACGTTTAATTGAATCTACTGATTATCGTATATCGAT  
AAGCAAAAAAAGAAAAAAGAAACACGAAACAATAGTTATCGAATCTCTCCGTAA  
AAGAAAGAGAAATGGTATTGGTGAAGCAGAGGGACGATAAAAAAGATACGATAAAGGC  
ACGAGCTTTACAGCGTAAAGAAGAAATTCGATTATCCCGAAAGGGACCGTTTACCTGATTT  
CGAATCGAAAGGGGAGACGGTGGCGCCCTCGCGGCGATTTCGATCGCGCTTGTCAACGATC  
GTCGAACTGAGGGCTGTTTCGATATCCCCTGCGAAGATAAGGGACAAAGGGAAACGAGGA  
CAAGAGCTATTCGTGTTCCAACCTTCTGCTATTTCTCTCGAGAGACGGAGGAGGAGGAGGA  
GAAGAATGCGGGAAAACGGGGAAAGAATCGTAATCGACTTTTCTCGTAGAAAACAGTTTC  
TTCATATCTCTCGTATAGAGTCGTGTAATGGAACGTCTCTACGAGGATAGATTAAAGTTGC  
AAAATTCTATTTATCCGCAAGAACGAGAATCGTGTAATTAACAAAAACCAAGGATTTCTAT  
CTGTATAAATGAACAAGTGATGAAAGTGAAAAAATAACGAGTGTCGATAAAGAAGAT  
AAAAGATTTCGAACTTTTGAGGTTATGAAGAGAATAGCGCGAGATATGAAAGATGTTTGA  
AAGACGCGTCACATTTAAACGTCGGTTTTAACTCGAGACGAGTGTAAGGTAGATCTCCTT  
TAAGCTGAGAGAAGATATATGAGACTGCATAGGGAAATTATATAGAACAGTGCCGGATCT  
TTATGTGCGATAATACCGACGGAGGAGATTTAACGCGCAATGTCTCGAATTGTTTCTTTGCG  
ATCGAAAAAGAACTGAACTCTGTCATATTGTTGAGATTTTTTTTTTCTTTCTCCTTGAT  
TAAGAACTTTAACTGAAAGATAAATCTTCGAAAAATTAATATGCAATATTCTCGTGATATT  
TGACATCGGATATGAACACGCTATACCAAAAATCGATAAAAGGAGGGGCACGCTGCAGCA  
TCTGACGAAAATAAATCTTTGACAGATTTACGATTCTGATTATTTTTCACGCACATTCCTATT  
GATAAGTGATTCTGTTCTATATTCTAGTGATGATGATTGTACAGAGAGGCGAGTAATTATGT

CATGATTTCCGATACGAATATTTGGAAATGCGAGTTAACACGTTCAATCAGATTTATGAGA  
ATAAAAGCCGAAAGGAAATCGAATTATCGATTGCTGCAAAATTACGATACGTTACAGATG  
CAAATACAAGAAGTTTACAAAACCTTCATCAAGACCAAGCAAATTGAATTAAATTCAATAA  
TATTTAAGAAAATAGAAGAACAACAAGAAATAAGATAGC

100. >MSTRG.1898.3 Gene=MSTRG.1898

AAGCACGCGAAACGCGAGTTGTTTCAGTCTCGGCAAAAGGACACGAGGTTTCGTGTTATTC  
CTAGATATATCGACGTTATTCCTAGACAAGTGTTCTTGAAATCCTGATAATTAACTAAAAG  
ATAAATCAAAATAAACTATAACTTTTTGTTTATCAAATAATTATTTGAAACTTTAACACGTG  
TTTAAAAACGATCGAAACGTTGCGGAAATAAATTAACTTGTAATCGTATATACGTAATAA  
TGAATCTCTTTAATAATTTTAGCTCGTGAAATATAGATTCAAAGACGAAAGGTGATACGATC  
AATCGTCTGTGGATAAGACAAACTACGCGATACGGAAAATTTCGATCGTGAAGAAGCATCT  
CGAGAAGAACTCGAACGTGACTCGACTCGAAAGAACAAGATCGACAACTTCAGGATCGA  
CAAACCTTCTTAGATACACGGACATGGCACGTCGTCAAGCCAGTGACAAGAAATCAATATA  
TCCTTTTCGATCTTCCCGCGATATCGCGTTCACCTTGATTAATCGAAGACATGTGCACATTGTC  
GTGAATTTGAACGATCTAAAATCCAAAATACGTATAAGATCGATTTTAAGTGCAAATCAGT  
GAAACCGTTCTCTGCCATTGTTGTAATATATTAGAGAAATATAATATTTAAAAGAAATTTATC  
CATCATCGATAACGTTAATATTTGAATGAATAAATCGAAGAAATTTGGTTCATAAAAAACT  
TTTAAGACATTAATCGTGATGTGTCTACAACTATCCATTGATTTATTCGAAAACTTTTCA  
AATATTCAACGGTCAGTTCCTATTAATAAATCGATTTTTCGCATTTCGAGTGAAGTTGCAGAG  
AGTTCGATCGATGGAACGACCAGAGGATTTAGTGTGCGAAAGAAATGTGCAGAATGTGGTC  
AATTTACAACGTATAAATTGTCTATCAGTTAAACACGAAGAGCAAAATGTCCGGTGAAGT  
GAAGGGGGGTCGACCAACAATGCCAACAATTCCACAATCCAAGAGACCAACCATTTTCGT  
TTATCCACAGTAACTCCAGAGAGCATTATCATCCCGATAGTATCATGCATACTCGGATTTC  
CATTACTGGCCCTTATGGTCATCTGTTGCTTAAGAAGAAGAGCAAAGTTAGCGAGAGAACG  
TGCACGAAGAAGAAATTGTGATCTAGATCATGGAGCCCTTAGTCTCGTTCGTTTTAGCCCTG  
TTCACCGTTTAGATTGAGGTCACAAAACATTTGTGTTCAACCCCAAACCGCTACTTCCGCTC  
GCTTTTTACCTAGAAACGCTGCTGTACTTACACATGTATATTCAAATATACACTTGCCT

101. >MSTRG.1907.3 Gene=MSTRG.1907

TTCCGGTTCCTTACGTTGGTCGTGAAGATTATACATGTTATTCCACTCGACAAAATTCCTCTG  
CTCTTCAAACTATTGCTAGCTTTCGGACTCGAACTTGACATGCTGCTTTCGATGCTACTGTC  
CTTTTTATCAGACGATTCAGAGTGAGTACTACTACTTTGCTTTTCTGGTGAAACGGTATCGA  
ACCTTGCTTTTCTGAGAATTATCTCCTCGAACTCTTCTCTTGCAATTTATCATTGTTGTTT  
ACGTAGTGTCTATATGTTTTTACATGCTTGCAGAAAGATGAGGGATCAGTGTACCTCTTCGG  
GCAACCGGGAACCTTACAACAGTAAGGCTTGTCCACGGCGTGAGTTCTGGTATGCTTAAAT  
CTGTCCGAGGAATTCGAGTAGGCCTTATTACAACCTTCGACAGGACAGACATAAGGGCGTT  
CACCTGTATGGGAACGAGCGTGAATTTTCAGATTCTCCGCTCTGCTGAAACTTTTATCACAT  
TGAAAGCAATGATGCGGCTTCTATTTCGTGTGCGTTCGGACATGGACCAGCATCTTATACCT  
AGAAAAGGAAAAATGCGATGAAGTAAGGATTGAAATTCAGTCGATTTGAAATCATGCAAA  
ATGAAAACTCTTTACCTAGCATTAAACCCACGTTACCTCTGGCACATCCTTCCCAGCCAC  
AATAGAAGAGTCCACGTGGTCCTGGCGCAGCATGCAATCGTGCAACATGTCCTGCCAGCTG  
TTCCAAGGACGTGAACCAACGACCACAATTCTGCCATCTGCAAAATTGGAACGGAATGTGTT



AGAAGAAACAAGTAGCATGCCATCACGTGTACCAGAGTCGACGTATAGAAACGTAATCGG  
 AGTGGAATGGCATTTCAGTTGAAATATCGACGCATGATTTACGTCAAGAATGTCCGCCAAC  
 GACCAATTGATACCAATTCGGTCCGTTGTGCAATTGGCGTCGCTTGACATCACTTTATTAG  
 ACGCATGCGCTATTTATCACGCTAAACGTCGTATTCTGTGAACGGCCATGTTGTGTAAAAGG  
 TTGCGGATCAAGGTAATGATGTTACCATCTAATTCCCCCGAACTGTATACAATTATTCTT  
 TTTTATTTTCATTGCTGTATATTCATTGCTGTTATATTCATTGCTGTTTAATAATCTCAGCAAC  
 TATATGAAAGGAAGAATTTCGTCACCTTATCAAATTTTCAGAAAAAATGGAGGATTTGTACAT  
 GACGAATATCGTGATTCAACGATGACAAAAATAACGTGTGTGATTACGATAATGAAACAG  
 ACATTCCCGAATTCACGAAGTTACCACATGCAAAATGAATGTAATGAATTATTGGACCATG  
 ATAAACGATCACATCTAAACCCAAAATCTCGTCGAAATATATCGTGAACGAAATTTACAAA  
 TACGATATTGCTGAGTAATCAGAAATCTTTATTTCCGGGGTTATCGAAATCTGACATTTTCTTT  
 GAAACAGTAAACACTTAGATTTGTCAAAGTCTCGATTCTAGACCTTTAAAAATGACCTA

102. >MSTRG.1924.1 Gene=MSTRG.1924

AGGTTGGTCAATTTTCGAGCGACGAAGCTGAACACTTGAAGCCGGCTGGGCGGATCTTGTTT  
 GAAGCTTCAGCGACATCCCTGCTCACTCTGTCTCGCTTTCTCACACGGGCGTCACCTCCTTC  
 GATCCTTTATTCGATGCTCAGAAACGGCAATTATTCGTGCACGCCATCCTCGTCGTCGAGAT  
 TGTCTTCGACTTATTCCTGTTTTTATTGATTTTAGCCGACTTCGCACATTCTTACACTTTTCAT  
 GATTACAAATTCACCTCCTCGAAAAACCACGAAATTACGAGTCTCAATACGAGAACCCGAT  
 AATTTTACAGACAAAAAATTTTCCTCACATCCGACGGAACGGAGGTCGTCT

103. >MSTRG.1925.1 Gene=MSTRG.1925

CGTGTTGAATAATATGCGTACACCAACGCTTCTTTTTTCTACCTGTGTTACGGTTCCTTTTT  
 TATCTACCGTAAAACCGTGCAGTTACTATAAAGTGGACTGAATCGTTTCGTACCAATCGTCGT  
 TCGAGCGATGTTTAATTAAATAGCAAGGTGTGAAAGGAAGCGGGAGTCTCGAATAGACCC  
 GTTAGGCATGCTAACGTACAAAAGAAAAATTTTAAAGGAATAAGTTTCATATATATATAT  
 ATATATATATATTGCCTTTTTTCGTCATGTTTTGCTATCGTTTAAAGGTACAAGCGTTTAAATATAT  
 TAATATATGTATATGTATGTGCGTATGTATATATATATAATATGCATATATGTATATATATAT  
 ATACATATGCATATGCATATTACATAATCATTATATCGTTCATTTAGTCATTTCAGTTGGTTCT  
 ATTTGGAACCGAGTGGATTTGTGTCAAATATCTTCGTCAGTGTTTCGATAATATATTTATTTT  
 TATTCTGGAATTTAACTCCACTTTATAGTATTTCTTAATATAATCTCGCGATTCTTTTATATTT  
 TTAGTCTTTATGCTGGCATCTTATTTTTTTTTTTTTTTTGTTCCTGTGAAAATTATGATTGTACTGG  
 GAAGTACATGATCGATGTCTGTGCGTGTGTGTATGCGTGAATGGACGCGCGTATGAGTGTAT  
 GTGTGTGTGTACATATATATATTTATATTTATATATATTATATATATATATACACACATATAT  
 ATATATGAAAGAAAGAAAGAGAAAGAGGAGCGTCGTTTTATTGGATGCAGAATTCGAATT  
 CGCCGTTTCTCCACAAAAGATATTCATTTTATTAAATATTTTGAATCGGTGAAACGAGA  
 TTCATCAAGTGCCACATTATTTAATTTTTTTTCGAGGCTGAATATTTTTTCGTAATATTCCTATA  
 ATTATTATGATATTCTCGTCCCTTGTACCTTTTTCCGATATAATAATCTCGTCGATCCAGAGA  
 TAAACGAAATAAAAAATAAAAAAGGAAGAAAAGAATAAGAAGAAGAAAAAAGG  
 AATGAAAAAACTCACCCACTGATTTTTTTCAGTTTTTCTGGTACAATCGGCGACAGCATTAGTG  
 ATTCGTTGTATATATAGAGCGGTAGTAATTGTTATGTAGGTAAATGGCTGGTGTGTATACA  
 CATTTCGTTCTTTTCCCTAATTATTCGAATTATCTTGTAACCTGTAACCATAACTCGGAGCGTT  
 GAGCGGACGGCGCTCAATAAAAAATTTGTGCTACGCTGTGCTTGTATGCGAATGAAAATGGC  
 AAAAGCGAGATGACGATAACGTTCTGTAAATATATAGGAGTGCCTGAAACCACGTTGAGA

[illegible]

104. >MSTRG.1925.2 Gene=MSTRG.1925

ATATGCGTACACCAACGCTTCTTTTTTCTACCTGTGTTACGGTTCCTTTTTATCTACCGTA  
AAACCGTGCAGTTACTATAAAGTGGACTGAATCGTTCGTACCAATCGTCGTTTCGAGCGATG  
TTAATTAAATAGCAAGGTGTGAAAGGAAGCGGGAGTCTCGAATAGACCCGTTAGGCATG  
CTAACGTACAAAAGAAAAATTTTTAAAGGAATAAGTTTCATATATATATATATATATATAT  
ATATTGCCTTTTTTCGTCATGTTTTGCTATCGTTTAAGGTACAAGCGTTTAATATATTAATATAT  
GTATATGTATGTGCGTATGTATATATATATAATATGCATATATGTATATATATATATACATAT  
GCATATGCATATTACATAATCATTATATCGTTCATTTAGTCATTCAGTTGGTTCTATTTGGAA  
CCGAGTGGATTTGTGTCAAATATCTTCGTCAGTGTTCGATAATATATTTATTTTTATTCTGG  
AATTTAACTCCACTTTATAGTATTTCTTAATATAATCTCGCGATTCTTTTATATTTTTAGTCTTT  
ATGCTGGCATCTTATTTTTTTTTTTTTTTGTTCTTGTAATAATTATGATTGTACTGGGAAGTACA  
TGATCGATGTCTGTGCGTGTGTGTATGCGTGAATGGACGCGCGTATGAGTGTATGTGTGTGT  
GTACATATATATATTTATATTTATATATATTATATATATATATACACACATATATATATATGA  
AAGAAAGAAAGAGAAAGAGGAGCGTCGTTTTATTGGATGCAGAATTCGAATTCGCCGTTTC  
CTCCCACAAAAGATATTCCATTTTATTAATATTTTGAATCGGTGAAACGAGATTCATCAAG  
TGCCACATTATTTAATTTTTTTCGAGGCTGAATATTTTTTCGTAATATTCCTATAATTATTATG  
ATATTCTCGTCCCTTGTACCTTTTTCCGATATAATAATCTCGTCGATCCAGAGATAAACGAA  
ATAAAAATAAAAAAGGAAGAAAAGAATAAGAAGAAGAAAAAAAAAAGGAATGAAAA  
AACTCACCCACTGATTTTTTCTGTTTCTGTTACAATCGGCGACAGCATTAGTGATTCTGTTGT  
ATATATAGAGCGGTAGTAATTGTTATGTAGGTAAATGGCTGGTGTGTATACACATTCTGTTT  
TTTTCCCTAATTATTCGAATTATCTTGTAACCTGTAACCATAACTCGGAGCGTTGAGCGGAC  
GGCGCTCAATAAAAAATTTGTCGTACGCTGTCTGTTGTATGCGAATGAAAATGGCAAAGCGA  
GATGACGATAACGTTCTGTAAATATATAGGAGTGCCTGAAACCACGTTGAGAGTGAATGAG  
ATACAGAGAGAGAAAAGAGGGAGAAAAAGCGAGAGAAAAGAGAAATGGAGAGTGGCAAAT  
ACTTTTCCAGCGGTGCAAGAACAATGAATGAAGCCGTTGAAAAAGCAATCACAGAATAA  
GAGGGGGAAAAAAAAAAGGAGAAAAAAGAACAGAATAAGATTATCTTTGCTCCTTG  
GCGCGTTGCGATCAAACCTGATCGATTTTGCAAATTAGATCAAAGGGAAAAAAGAAGAT  
TAAACGATGTGTGAAGCTAGTGATCGTATGCACAAAATCAGCTGTTGCTTTTTAAGGAAAT  
CTAATTTTTTTATTTACTTATTAATTACAATGAGAGCTTTTTTAGGAGTATTTTTAACAATTT  
GACGATTGGACCTCAAATGGACTCTCAAATGTATGCGACAAATCATCATATTTGGATTAAC  
GCGAAAATGCAAATCCTGTATCCTTGAACAAGTATTCCTGCTTTTTGTTCTTGACTAATGTA  
GATATCGTAGCAATCATCATTCTCGTGGGATTGCTTACTTTATCGTCGCTATATAGCGAGAA  
TTACGGGCTCACGTGTAACAAGTAAATTTGTTCCGGCAGCCATTTGAAAATTGATGTTTGCC  
AACACAGTCGTTTCGTCGTATAGAAAATTAATTCTTGCTAGTTAACCGTGTGGATCGATTAA  
ATGTTTGAATAGCAATATTTTACGAGTATTACAAAATCAAATGCGCTAATGTTTTCTTCTAC  
CTAATAATATCTAACAGTAAATCCTCGTCAATAATTCAAAAACGTCAATGCGTTATCAGCTT  
CCACACGATGTTATTCAACAAATAAAAGGATTTAACGTTGAACAGTATTAAGTACAAGAA  
ATTAAATATGAAGAAATGTCTAGGAATCGTTACCATCTAATCAATAACAAATGAACGAGG  
GAGCCCGTAATTTATCCTTTCTTTCATCATCCGCTCTTCCCTTCGATTGTTCAATTTCTATTAA  
TTTTTTCATTACGTTATTTTCAGTATTTTTCCACACAGCGCTTAGTTCCTGAGAGCCTTCGCGCC  
AAGGTAGTCATTTCTCATTTTCATAAGGGAGTGGAGCACGGACGAGGCGTCGATCGATTTA  
CCGCATTTTTGCACTATTTTTCAATCTGTAAAAAGATATTTATTTGAAAATAAATAACTCGA

AAAAAAAAAACGTTTCGGCGCCTCGCGATCTTCTTATGTCTGCGTATTGCGATCGTATCCTTTC  
 TTTATTCTCTGTCAACATTTCTTAATTTATTCTTCTGCTCAGGTTTCAAGTCATGCGAAGCGAA  
 ATGACTAGAAAAAAAAAATGACATTCACCTCGAAACAGGATTCCAGTAAAGCTGCTTG  
 TTTTCGTTTCACGTAATATCCGAATGGAAAAATATAGGTCGAAAAGTAACCTTGAAATGGAC  
 TGACATACCGTGTCAATTGCAATCGTCGAGTTTCAATTATTATGCATTAACCGGTCCATGGA  
 AATTGTTGACACTTATCTCAGACGGTTAATTGATTGAAAAATTTGCATAGGTAATAAATTTT  
 TCTTTTTTATTATTATTAATAAATAATACTTTATAGAGGTTGGCCATTGGAATTTTCAATTT  
 TTTTGCAATTCCAAAAATCTCGAAGTCTAAAAGATGACTTGTAATAAATTTAAAGATGT  
 TGCAATTTAAACTTTAGACTCATTTTAATTCGTGTGATCTCATCATCATTTCTTAACAATTGTT  
 CGGGAAAGGAAAAAATGAAATCTTCGTGAAAAAGAATAACTACGAACAACCTTCATTTTA  
 TAAAAATTTCCAGAATATTGAAATTAAATAAATTTATTTAATATAAATAAATATACAATTTT  
 TTGGCAAAATAAATAGATATTTCTTGAAAAAAGAAAGAAAGAAAAAATAAATAG  
 ATTCTGAATCTCTGAAGAGTTTCGAGAATTTATGACTTTAGTTTCAAAGTTTATTATTCAGT  
 CTTCATAGTTAAATATTTTATTTAATATTTTTTTTTCTTTTTTTTTAAGATCCCTTGCAGTATT  
 AGAAGTTTCACATATCTTTTCAAGACGAGTACAAAAGCCCGAATACAAATTTTATAAAGGA  
 GAAAATTCTGCAAATAATTATCTGATACTTGTTTAATAAAATGATTATTTATAATAAGATCG  
 AATGTAATTGCATCCAGTTGAAAAATTTATATCGATGAAATATATGTGATGAAAAATATTT  
 CGTCACATCGGCAAATGCATAAAACAAGTGAACTCGTTGATGAAGAAAGTATTGTCCGT  
 AATCTCAAGGCAACCCGGTCAAAGAATATTGTTTTTCGGTTGGTCAAGATATACCAAGATTT  
 GAAATGCACTTTTATATATATATATACATATACATATATATATATATATATATATATATAT  
 ATATAATGATTTTCATCGGTAACCTTACATCATTATGTCTGTATAAGAAAAAGAAAGATTCGA  
 AGGACTAATTTCTATGAAACACGTGTGTCTGATGTTTCATTAGACTTATTTTGTAAACGTGATA  
 GTCAAGCCGGTCTTCATGCTTCCAAAAATGTCAGAACGTGAAATGAACGTTATTATACAAG  
 TCATTTTCTGAGAAGTTAAAATTTCGAAAGTTCAAGGTAAAGCGTTTCTCCCGTATTAATTTT  
 TTTTTTAATAATTCCAACAATCGATACTTAGAAATTTATTAGAAATTATGTAGAAATTGCATT  
 CCTTTCTCTATTTCTTTTCTTCCTTCTTTGTTTCTTTAATCCTCTAGATTTTCAAATAATGTC  
 TTATTTGTATGGATGTTTTTTGAGGCTTCTTGTGCACGTCTTGATTCCATTATCCGGCAGATA  
 TTAACGTTGTGATATTTTATAATTATTGAACGGAACCTCGTTATCACTTCTGTATTATATTACA  
 TGAATGATATTATTTTATAATTATTTTCGGAACCTGGCTTCTGGAACACTGCGGGAAAAATGCGG  
 CTCTCCGGCGACCTGAATGGTCCCTTTCTTTTTTTTTTTTTTTTTTTTTTTTTTTTGTGTTTTTTATTT  
 ATAATTGTTGACGTTTGTCTGATTCTTATTTTGTGAAATGGATGCGAAACTATCATGTGCTG  
 ATAATACTTTGAAAATCAA

105. >MSTRG.1937.4 Gene=MSTRG.1937

TTAGGTAAAGCTAGGTGCTATTTAGAATGTAAAAGACAATTTTATCTAGAATTCTTATCATT  
 TCGAATAATTATCTTAAAATTCATTATATAAAAAAATAGAATAAAATTAATTATGTATACA  
 ATGGTGTATATGGAGTTTCCAAATATTTCAATTGTTTGTACATACATTTCTTGGTTATCTTTTA  
 ATGTTAGCTGTTATGACATATAATGTATATATCACTGTTACTATTGTGCTGGGAGCATGTCTT  
 GGATATTGGATATTTGGTCCACAACCTTATAGAACCTTAACATGAAACGATTTTATAAAAGAC  
 AAATATTATTAGACTGTGATAAAGAATGTGCAGATAACATAATACATAGTCAGAGACATG  
 AATCAACAGTTTCTGTTGTGCGCAGACCAATTAATAACAGAAGCTACTGTTGAAGTACATAT  
 ACCAAGAGATGCTTGAATCAAACATTTATATTACTAAAAA

106. >MSTRG.1945.3 Gene=MSTRG.1945

GCAAGATGGCGAACGCCGTCACGAGAGTAGTCTTGCGCTGCGAAGATGCACAAGAACTA  
ACAATCTTGGTGCATCGCGGGTTTTATAAAAAATTGTGTACTTTTATTAAAATTTCCCGTTTT  
TTGAGTGCAGTTTTTACTTAATGAATTGAATTGAAGTTGATATACAATTTTAAGATTACCGA  
ACAATGGTAATATTTGAAAAGTGAACAAAATTCTATCATGAAATATTGATACACTGACCCA  
GTTTCGACAGCTGATCTGTCAAGATCACAATACGGATGAATACAATGTGCT

107. >MSTRG.1960.1 Gene=MSTRG.1960

AATGTATCCAGTCAGAAAATCGCATTTTTGATAGACGCGTAGTATGAATCGTTTTAATCGATA  
AACTGCATCGCGTGTACATTGAATAAAAAATCTCCAATAAATGACAGTGTCCGATTATTAA  
TTGACATTTTCGACCGTGAAGTTTATTCAGTGTAAATCCGATACAACGTAGACGTGAAATATCG  
TTAGAATTCAGGTGCCCCGACGCGCAATGAATATTGGACTTCATAGTGATTTCTTCTTTTCCG  
GTTCTATTGGAACGTATCCCATAATTTCTGCAAAATGGCAAAACGCACGAAGAAGGTTGGAA  
TCACTGGTAAATATGGTACTCGATATGGTGCTTCCCTTAGAAAAATGGTCAAAAAAATGGA  
AATTACTCAGCATAGTAAATATACTTGCACGTTTTGTGGCAAGGATGCTATGAAACGAAGT  
GTTGTGGGTATTTGGTCTTGCAAACGATGCAAAAGAACTGTTGCTGGAGGTGCATGGGTAT  
ATTCAACAACAGCTGCTGCTTCTGTTAGATCTGCAGTAAGAAGATTACGTGAAGTTAAAGA  
ACAGTAAATAAATTTAGTGAATTTTCATATAAATA

108. >MSTRG.2107.1 Gene=MSTRG.2107

TTTTTCTTTTTTTTTCTTTTTTTAGTTCTATTGTTTGTACATGTTGAACGATACCTTCTCTCGG  
GTTGAACACATTTCTGCTTCGATTTTGATAATAATGTTATATTTGTTTTATATTCGGAACAC  
ATTTGTGATGATTGTTTTATCCACACGAGGATCGATCGATCCGATGACACAATCGAGTCAA  
CTGTTTTATATTTTTTAATCGTATTTTAAAACTTTATCCGTTTGATTCACGTCTACTACTTCC  
GTTGTTAGTTATTTATCGAATTTAAAAATATGCGAATCAGGAACGGACAAGAAGATTAGT  
TTAAGTAATTTTCATTATATATATATATATAAAGAGAGAGAGAGAGAAGGAGGGAGAG  
AAAAAAAAGGAAGAAAAAAGCCGATACCTCGATCGATCGATCGCCAGATCGATCGTCCAA  
CGGAACAAAAAAGTCGCAGGGGAATATCTTGGCTTGCGATCACCGAAATAGAGCGGCCA  
TGTTTTTTTTTTTCGAATTCGTCAACTTTTGCCGCCGAGTAAAGGGTGTTCGAAAACCAAGA  
AGAGGAAACAGAGTTGCGAGAAACAAAAATGAAAAAAATATGGGTGTTTCGAGATATTT  
TTTGTGAACGTGTCTGCCGCTGCCTGTGCAAACTACGTTGCCTCGACAAATGTGTCTAATT  
TATTGTGATACGATAATTAGCTGGACTTTTAAGCTGCGTGCGTGCAAAGTGATAATCGAG  
AGAAAGAGAGAAAGAGAGAAAGAGATATTGTGTGTGTGTATGCGTGCGAGTGTGCGTGTG  
TGTGTGTATGTGTATACGTGCGCGTTCGATGTGAAAGAAGCGGGCAAACAAAAGGGTTGTG  
CGAGAATGGATGAAAGAAGGAAAAGCCGGAACAAAGAATGCGAGCGAGCATTGCATCTG  
GCACCGGATGGTCTTCGTACCGAGTATATTCGTTCTTTCCCAATTCTTTTTGTTTGTGCGCG  
GCGAAAAAAGAAAAAGAGAAAAACGAGAATTCAACGCGATCAAGTTGGGCGATTAAA  
ATTTAATTGAACTTCTTCGTAGTCGTGAGAACTAACTAGTAATAATAGAATTATTCGAA  
GAGAAGAGAGAGAGAGAGAGAAAGAGAGAAAAAAGATACAGAGAAGAAATACG  
AAATACGAAAATATTCCGAGGAAGTGGATTATTTTTTTAAGTTTGAAAGGACAGCGTGTA  
TCGAGACCACTTCCGGCCCCGGTTTTTGCGAGCCTGAATTCACACACAATGTTCTTTTTCTCTT  
GTGTTTTTTTTTTTTCTTTGAAGCCTGGACTATTGCAACGAGCGATCTCACGTCTATTTAAG  
CATAAGTTTACGAGTTTAACGTGGTATTGCTGTATAGTGGCGAGTGAACACGAAGAATTTAT

AAATATGTAATGCCTTAATGTTATATAAACGATAATAATGGTATAGCGTTACTTGTATAATT  
 AGTTGTGACGCGAGGCTGGAGGATCAAGGAGGATCGTGGATAAGATAGATAGATCGAAGG  
 GAGGTGGTAAACAGAAAGGGAGAGAAAGAGAGAAATAACGAACGAACGAAGAAAAACG  
 AGATATATATCGATGTGAAAACAAGAGGACAAAAGTAGAAAACGTAAAAGGGTGATGCG  
 GTAGGTGCGGCGGTTTGTCTCCATTCTGTTCGTGATTTGATATTTTTTTATAATTCTGACGAC  
 GAGAGAGAACGAGATTGGAGAGAAAGAGAGAGAGAGAGAGGGAGTGAGTATAAATGGAGC  
 GTGTATAGAGAGCGGACTGCTATCTAAAATAGTTCAGGCTAGATGTCGATGTTTGTAGCAG  
 ATAAAGAACAAAAAACAACACAGCATATTGTAATTAAAATTTAAAGTCATTA  
 ATACCGCCCGCTTTTTTATTCTCGTCCGATCGATCGATCCAATCTTTTCTCCTTGTCCTCTTTTT  
 TTAATAAAAAATCAGCCGATACATCTATTATTAGATTCGTCCACTCGAAAAGAGTAATTT  
 AAATACCGCGTTTCGTTGTCAATTTTTTTTTCTTTCTTTTACGAAAACAATCTTCATTAAGAG  
 GAAAGGAAATATACGAAACATTTTGAAGAGAAAAAACTAGAACTATTCTGAATCATTCGTC  
 GAATCCTAGATTTTTCTATTTCTTCCGCCGATAATTCCTAATTTTTCTTTTCAAATCAATTC  
 TAATGAATAAAACGCACG

109. >MSTRG.2144.3 Gene=MSTRG.2144

AAGAAGAAATGATCTAAAGAAACAATAATCTGGTGTGAATGAGCAATTGTATTTCTTTTTT  
 CTTGTTTTGAAACACGTGATACATTTTACAAAGACTGAAGAATTTTAAGTCTAGAATGTATT  
 AAAATTGAGAAGATAAAACAACCAAGTGTACGCCCAGGAACATTTATGGGCCGTAAACG  
 GTGGTGCGGTGGAGGTCCAGAGCTGTTGGTGCTCTTCATTCTCCATCATATAATTCTGGGTG  
 ATGGTGATGTTGGATAGGATTTGAAACGTCGAAAAAAGAAATGAAAAAAGAAAT  
 GGAAAAAAGATGATGTTGATTTTCGCCCACGAACTCTTCACTATTATTGAGCTATACATCC  
 TACGCAACCACCACCTTTGCAAACCTCGGTTTCTCTCGTTTGCCCTGAATTCCTTTTACGCAC  
 AAATGCTTTTTACTTCTATTTTTTCTTTTTTGTCTCTCGTTTCCCAT

110. >MSTRG.2145.2 Gene=MSTRG.2145

TATATATTTGAAATAAATTTTTGACTTCTGGTTGATAGTTACTATTACAAAAAGGTATTAAG  
 CATCAAAGGATAAGTTTAAATAAAAAATAAATTCATATTTTTATTGAAATTTAACTTTTATCA  
 TTAAGAATTAGGATATGGGTGAACGATATAATATTCATAGTCAGTTAGAACATTTGCAAT  
 CGAAGTATATTGGCACAGGCCATGCAGACACAACCTAAATTTGAATGGCTTGTAATCAACA  
 TCGTGATTCTTGCACTTCTTATATGGGTCATTATGATCTGCTAAATTTTTTCGCTATCGCAGA  
 AAATGAAGCAAAAGCTCGTGTCCGGTTTAATCTCATGGAAAAAATGTTACAACCTTGCGGT  
 CCACCACCTGAAAAACCAGAAGATTAATTAATTCAATGAACAACGTGCTTATTGAAAATA  
 AATTATTTAGTAAATTAGAATAACCTTTATAAGAATAAATCATAACACGATATATGGACT

111. >MSTRG.2160.1 Gene=MSTRG.2160

CTTCATCAGGTGCAACGGGATTTAGACGAGGAGCAGAAGTGCTACCAGTAGTTGATTCGTC  
 TTGACTATCTTCTCCGACTCTCTCGTCTCCACCTGGTTCTTCTTCAACAACCATGTTGGCCAA  
 AACATGTTCACTATATCTAGTATCCCTCCGTCTAGGTCTTCTTGTAGTTACATCTCCACCTTTT  
 TGACTTTCTTCGTATAAATTCGATTAATCTGACGTCTAAAATGTTCTCTTCAGGTTCCCATGTG  
 TTATATTTTTTGCTCCATCCCTTCCACTTTACGAAATATTCTACTTTACCCCGCTTTTCCCTCTT  
 CTTGTAATCCGTTCCGCAGCGTAAACTCTGTACCTAGATCCATGATGTTTTAATCCTTGTT  
 TTTTAGATGCGTATGAAAGTTGTTAATATATCCAATAAGAAAGTGATGCGTGTCACTGAAAT

ACACCACTGAGCAATGTAACACCATATGTAAACACAAAAACGCGCGTCCCATCGGAAAG  
GGAATTTCAAGCGGCACAGTTTGCGCGCCTGAGTTTCTTCTTCGTGTGTTACGCACAATAA  
TCTTGTGTACGATATTCGTGCGAGCACTCGAAATACTCGACTGCGTTTCGTTTTGTTTCGAAGT  
TGTGTTAGATTTGGTGTCTGTGTTGGCCGGCAACACGTTTTCTGCTTCTGCTGGTGTGCTGCT  
CCCTTCGTGCAAGATCGGGGTTTCGTGACGTCAGCAATTCCCCCTCACCTCGTAAACACCAA  
ACATGGCCGTCGTACGGATATACGCTGATCGAGTGCGTCCCAAACCTGATGGTGAAAATTAA  
CGTCGATATAGGCACTAGCAACTTGTGGATCCGCGTACGAAGTGCGGAAAACCGTTTTCAA  
GCCCCGTGAACGCTCTACAGTCTCTTTATATGCAAATATTTAAAACTGGAGCGATCGACTC  
ACAGCGTCTAGCACATTCTGCGGATCGAGGCCGACTAGAGCCGAGGTCTGCCGAACCTCCCC  
TCGCAAGCTTAGTGGAATCGCCCCGACCCGCTCGAGGTTAGAAGGGGAGGGGGTAACGGTA  
GAGAAAGAGTATCGAAGGGGAAGGGAGAACTCTCAACGGTACGTGCGCCGCACACGAG  
AGAGAGAAAGAGAGAAAGCAAAAGGAGGAGAGTGTGATTGAGTGACCGAGGACGAGAG  
GGGTAGGGAGAAGAGGGAGAAAAGAGCAACGCGCAATGGAGGTAGAAAAGAGAGACGGC  
ACGACCAGGAGCGCCGTCTCGGAACAAGAAAGCTGCCTGCCTGCTTGCCTGCCTGCCGCC  
TGCTAGCCAGCCACCCCAAGTTCCCTTCTAGGCAGTTTTTTCGTATGGACGACTAGCTACCTT  
CATCGGTGATTTGTCAAGCATGCACATAAAGATCCGGTAGATGTGGAGTAGTGGACCAGCG  
ATATTCGATAAATCAAGGTCGATCGAAGGGAAGGAAAGAAAGGAAGGAAAGAGAAGGAG  
CCATCGGGCCGGGATTCTGCCGTGACGCAGAAAAATCAAATTAAACAGCCGCTTTTAAGTC  
GAATTAACGAATGCGCTTAATTAAGCGGCCTCCGCCGCTCAACTAAAGGAGTTTTATT  
GACAGCGACCGACTCTTCCTTTGTGCGCCCCCACTGTGTACCCTTTCATTATTACGTTAAAA  
GATGCCCTCCAATTTTTTTTTCTCTCTTTTTTAGTTTTTGCCGCAAATAACGCTGCATCTTTTT  
TTTCTCTCTCCCCCTCTCCAAGAGACCGCACGCGGTTTATCTCTTCTCTTTCTTTTTTCCC  
CTAGTTTTCTCTCCACGAATACGAAACACGTTTCGTTTCTTTGTTATTCTTTTTTCTTTTTTCA  
GGGGTATTTTCGATGCGAGATTTTTGTTCTACTCGTTTTCCCGGAAACGTGTGGATTCACGACT  
CTTTTGACGAAAAGAAAGAAAAAAAATGTTAGAAAAGAATTAATTTTCTCTTTTTTTTTT  
TTCTTTACTTACTTCGTTTCTTTTTCTTGGATGGAATTTATTCAAATTATCGCGAGGTTTCTCT  
CGCAGGAGTAAAGTTTAATTGGATCGGA

112. >MSTRG.2169.11 Gene=MSTRG.2169

AGAAAAAAAAAAAAAAAAATAAAAAATACGATTCCTAAGGAGAAATGTTTTAGTGAACCTTTTA  
GCGCTCGTGTGTGATAATATCTTGCGGATAGTTTGCAAAATACTCAAATTCGACGTGAGAA  
ACGAGATATATGTGTGCATCACGATAAATGGTTAAAGAAAAAGATGAAAAAGAAAAAAA  
AAGAGAAGAAGAACGTCGATAAGGAAGATTGATTTAGCTTTTCGATTTAGTTGTTTAAAAAA  
TGCGTTAGTGTTTGAGATATTTTTATATGTTGACGTTTAAAGTAAAAAAAAAAAAAAAAAAAA  
AACGAAAAAAAAAGAAAGAAAGAAAGAAAGAAAGGAAAAAAAAATAGAGAATTATTATTA  
TCATGAAGGGAAGAGAAAGAATTTTTCAACGAAATATAAGCGAACACACTTCGTTGTCTT  
CTTTTTTTATCGACGAAATATATTACGAACAAAAATTAAGGGAAAATATTTAAGAGAAAAT  
TAATACGACATTAGAGAGTTATAACGGAAGCTTATGTGCGGTATAATGGCGGCTATTATGT  
GATTTATCGATATAATTCCACGGACCGTGATTTTAATCAACTTTTTAAATCGCTAATCCGTTA  
CGTAGTTTAATTATAATTAAGCATTGTTCCATTTTTATGCGCGGACAGAGGCGTGTTAATAT  
CGAGTCGAAACAGTGTGCGAATAATATCTATGACAATCTTGTTTCAATTGACAAGACAAAC  
TATTTTTCTTTTTACTGCCAGGTATCACTATTTCTATTTGCGGAGCTGCCTTGAGGAGCAAA  
CGCTTATTGACATATACTATAATACATACACACACATACACACAGACACACAGAGATAGA

AACAGTGAAGAAAGAAAAAGAATGAAAAAGAAAGAAAAAAGAAGTAACGTGTGAGT  
GTAAGTGGAGAGATAATAAAATATAAATGTAAAACCTCATTTTCTCTCTCTCCCTCTCTCTC  
TCCCTCTCTCTATCTCTGTTCTCGGCGAACACACGAGAGAGAGAGAAAGAGAGAGAGAGAA  
AGAAAGAAAAAATATCGGAGAAAGGAAGAAAAAATGCAATTGTGCAATTTTACACATACAC  
GTACACGTACTTTGTACAGAAATAATATACATAGCGCGTATTTTAGTGGTTATTATTATTGTT  
ATTATCATCACTGCGATCCTCGTTGATTTTCGATCACGCGTTTCGATCGTGGAAGCATCGAT  
CTTGAAACAAAAAAGAAAAAATATATATATAAAAAATATATATATATAAATATTTGTC  
TACGAATATCGGATATACTCATCGATAGTTCTTCTAAAAATTGATCGGGTAGAGTAGAGAG  
AGAGAGAGAGAGAGAATGAATCGGTGATTTGATTAGTAAACACGTAGACATTGTAATTAA  
TTGGATTAGATCAAAAGAAAGCGTTTTCTTACGAAAGAGGAGAAAAAGAAAAAATGAG  
AGAATCGAAACGTGTTTCGATGTCTTGACGCTTAATGCCCTCCCTCGAAGCTTCCTGTC  
TCTGCAGCATGTGATCGTCATAAAGCTCGCGTAAATTGCGCTCGAAACCAAATCGAAAATG  
GGAACTCGTATCGATATCTTCTGTTTCGATGAACTTCGTCGTGATCGAGGAACAATAAAA  
AAAAAGAATCGAAATCTGAGCTGAAATATATCGAAAACGAAGTTATTCGTTAAAATATATT  
GAACTCGTACCATACTATTTCTATTTTATACATTTTTCTTTTATATTAATTTAAAAATAAGA  
GGATATTAAATTCGCAAAGAAGATTCAACAAAAATTATGAAAAATTAATAAAAGAAGATA  
AGCTAAGTAAAGTAGCTTATACTCCTCGTTATATATTCAATCTTTTCCCTCAACTTTTCGAAAA  
CTTTCTAAATATTTGAACTCGATCCTCGAACGAATCTCCATCGATATCGGAAAATTTAATT  
CGAGTTTCCCGCTGCGGACGTAAGTCGTTACAGCGTGTCCATCTTCTATCCTTCTAAAATAG  
TAAACTTAGTTTTAACGATCGTCCAATGGGGTGAGAGGATCGGATGATCGATCTCTCTCGTA  
AACCCGTAGGTGAACTCAGTTGTTTCGATATTATAAGCAAAGAAGCAAAGAAAATTGAAAA  
AAAAACAGACAAACAAACAAAAAAGAAAAATGAAGTAAAAAAGAAAAAAGAAAAA  
TAAATAAAAAATAAAAAAGAATTTTTCAACTTCGCGATCGAGAAGGTGTCAGGCAGAAAG  
GAGAGAACGATTGAGAAAGAGGGGAAAAGTAAGAGTGAAATACGAAGACCTTCTCTTAA  
GCTAGAACCACGGAGACGCAGGTGATTAAAGGAACAATGTAAGATAGGGAGATGAAGCG  
TCTCTCTCGTTCCATTGGTCGACCGCTGTGGCTACCGTGTAGTCGAACAAATATATCCATATT  
AATTTCCGAATTGCCTGATGCGTGTTGTATGTGTGCACCGTGATGCGTGAGAGTGTTTTAA  
TTGTATTTCGAGAATAGTTGAGAAAATGCACGAGAGTGAAGAACGAACGAGAGAGCGACGT  
TGAAGGTCGTTATAGTATTTTAAAGGATTGAAAACGAAATTTTTCTTTTTTTTTTTTGAGGA  
GGAGGAGGAGGAGGAGGAGGATGAGGACGAGAGTGAAAATGGGGAAAAAAGTCTGA  
GGAGAGAGCATGGAACAAATGTGAAATCTACTCGACGACGTTTTCTCATTTTCCTTTCTTT  
ACTTTTTTCTCTATTTTTTTCTTTTTTTTGTTTTTTGTITATATATATATATATTTTTTTTTCT  
TTCTTTCCCGAATAATTTTTCCACCATTTTCGTCGTAGAGGAGCCACTCTCGAGGACGGAT  
GATTTAGGAGCGACGTGTACAAAACACGAAAAGCGAAACATATAACGATTTAAATAAATA  
TAAACAATTGTAAATAATTAACCGAGAGAGGAGACGAGGCGATTTTTTAGGCGTGACGA  
ATGATTTAAAGAAAAAAGAAAAAAGGGAAAAAAGATTCAAAGATA  
AAAAAGAGAGCGCATTGTAAAACACATCGCAGTAGTGAACCACGCTACACGCTAAAACGA  
TATTACGCATGGCAGAAACGAGTGAATATACTTATAAATATTTGATATTAGATAAACGAGG  
ATAAAGAAAAAAGATAATGAAGAAAAATGACGCCCTAACGCGAGCGATACACAC  
CATATACATATATAAATATTATACATATATACATAGATATATATATATATATTATTATATCG  
AGGCGTACAAGCAGTATGTGCGTTTTCCAGCACAGATAGTTGGTATTTTGTGTACAAAAA  
AAAGAAAAAAGAAAGAAAGAAACAAGAAGAAAAAGAAAGAAAAAGAGGAAGGGA  
GAAAAAATTTTTGCGAATAAAAGCGAACCGGATGAACAATTGTTGGATATTTTCGCCGCG



CCCTGTCCAGTCTGCGTGATTATTATTATTTTATTATTATATTATTATTATTCGAATTATT  
ATGATTCTCTAATTATTATTCTATTATTATTATAATTATAATTATTATTATTATTATTATGTAG  
CATGATTTGCGTAGGAGAGGGCGGATGAAAAGATAATTTGTCAGCGCTGATAAGCGTCACT  
TTTCGTGTCGATCGTTTCGCGATGGTCGAACGAGAACGTTCCACGTTTTCCAGAGCAAACC  
GAAAATGCAGATTACTCCCTTCTCGCAACGAAGATTATCCTCTCATATTAACGAATGTCTCT  
GCCACGATCGATCCATCGATCGATCGAATCCATCGAAATTCGCCATTCACTTTTTTGCTCTC  
AGCCATCTTTGCCATTTGTGCAATTTTCGATTTGCTCTTCTACAGGTATCCTCGATTTCTTCAG  
CTCCGCGGATATTTGCGATAATCTAATTATAGTACAACGTGTAACAACGTGTGTGCGTGTGT  
ATAAATTAATAATTGACGTTACGAACATTTAACCTTTGCTATTTGATTGTTTTGTTGAAAGT  
ATTGAAAAGAAGAGGATTCTATATTTTAGGATTCTATCTCTTCATTTTTAAAAGTACGATAA  
AAAATATTTGGAAAAGAGAAAGATTATAAAGGGATAGAGATATAAGGGATATTGGTGTC  
TGTTTTAAATTTATAAATTTATAAATTATTCGTAAATTTTTTCAAAGAATTCTAAAGATAAA  
ATCCTTGACCATGTGCTTTAAATGTTTGACAACCATATCTCGATTGAAAAGGGATAAAAA  
AAAAAAATAAGTTAAACTATCCAAAAGCGTCGTTTGCCAAATGAATCCAACTTGAGAGA  
ATTTGCGCGGAGCGTGTTAACTCGAGGGCGCCATCTACACAGCGAGAAGGTGGAATAAA  
AGAGGGGGAAATGAAGTGAGGCTGTAAAAAGAAATTGTCGCGGTGGCCGTGGCAGACAC  
GGCCGATTCTACTTGTATCATAATCTCTTACGATAGTGCGCTATAATTAACAATAACGAAG  
AAAACAGTAACAACAATAAGATAACTCGTAATTTAAGGGAGCGTGAAGCGGAATGAAAG  
AGCGAGAGAATGCGAGCGGAAGAGCGTATGTATGCCGATTAATCACGTGCAAACCGATTT  
AGTGATCGATTGTGATCGCTAAGAGAAGCACCTCGTAGCTACGAACGGGCTTTTCACGGC  
TTTCAGTCGCTGGTCTCGCGATTTTCCTCACTTCTGCTCAACCTTGATCTCTCCAATTACGAA  
ACAATTTATTCACCGGGCGGATTTTCGAACAATTTAAAAAAAAAAAAAAAAAGAAAAAGAAA  
AAGTAGCAAAAAACGAGAAGAATCTGAAACGGTCTCTTCCCTCTTCTGTGGTGGAAAATAG  
AGTTAGAGGGAGGGAAGAAATATAGACGAAGAGACCGAAACAAAAGAGAACAAAATGG  
CGCGAGACCAGTGTCTGCGGCTAGCCCAAAGGATTTTACCAAACGACTCCGCGATTTCG  
GGAGTGGAAGCAGTTATATAAAAAAAAAAAAAAGAAAAAAAAAATAGACGTAATTATTGAAT  
TTCGTTTCGATTTTGTAACGAAGTCGAGTGCGCGAAATTCAGCCGGCGATTAACCGTGCCT  
CCTCGAAGGGCTCGGTTTTATGCCGAGGAAAATAAATAATACGGGGACAAACGTGTGTTTT  
CGCCGGCTTTTCGCGGATGGCGAATTTTGTAACGCGGACGCGTCCCGCGAACGATCCCT  
GGCACGTCGAAAATTGCACGATCTCATTGATTTTATAAGCATGAAACATTTTAATTATATAT  
TTTATTCCCTTTAATCGAACATTGAGTTTTTTAATCGACTTGTCTATATATTTTATATACGC  
GTATTGGCTGTTGATAAAATTATCGTATATCTATATTTATTATTATTGTTTAAACAAATTTG  
TCGCGTGAATCGAATGAATGATAAAAAACGTGATTTCTTCAAATTTTATATTTTAAAAGAC  
GAGTCTTATTTTTTTTTTAAAATTGTTTCTTTTAAAAATGTTATTTGAACAGAGATTGTTATGA  
TCCTTCAAATTACAATTAATTGTATCATTTTTGAGGGGTGTTTTGTCAAAGATTTATTGTTTT  
TTTTTTTTTTTTAATAATGTTGTACCTTTTTTTTCTTTTTTTTTTATACATATATATGTATTGTG  
TTTTATTCAAGCGTGAGAAAGAAACATTCGACCAGTGATCGCTTGCCGACGCGTCATTCCG  
GACGTAATATGAAGGAATGCGTTGTATTATATATCGAGAAACCCTCTAAGTGTAAGAATAA  
TAATGTATATATAATTATTATTATACCATAAAAACTTCGATTGATTGCACTCCGGGGAAAAG  
GAAACTGTCTCCCGCTCCCAACGTCTATGAAGAAGGAACAAAAAGCGAAAAAAATTGAAA  
AATTGAAACGCACGAAAAATGAACGAAGACGAAGCAATCTTCAAATCTTCAAAAAGAAA  
GATTTAAAAAAAAGAAAAAAAAGATAAACGTACATTCATGGATACAAAATGGGG  
AAGAAAAATGAAACGATAAAAAAAGAAAAAGAACTGTTCTCATGATTGATTTCAAAT

GAAGAAACGAATAAGATGAAGAAGATGAGGAAAAAAAAAAGAAAAGACGCTGCGTTTT  
TCGATCCAGATTCGTTTTGTTTTTGTGTTAGTTTGTACGCACTACGATTTATCGCAATTTAT  
TGTATTATCGATGAAATACTGTAACAAAAATACTGTTAACTATTCTTAAAAAAATTAACACT  
TTTGTAACACTGAGACCAACCGCAATTTCTCACGACATACTCTCCTGAAACATAATTCCAAT  
AGGATTCATTAAGTTGTCGAGCAGCATTCTGGTGTAAGGTAGGGATAAAAGATAAAAA  
CTCGAGAAATTGCACATTCATAAAGATATTTTATTTTATAATTTTATAATTGGATATACATT  
TTACTTTCATGTGTTTTATTTTTTATTTTACACGATGCATTATCACCACGATATGGGGTATAA  
AGCAGTACAACACTGCACACAGAAGCTACAACCGCACATTGACTCATTATACATTAAACAT  
TTTCACGGTACAAAAGCTTCGCAATTTATTCTTAAAAATATACGATAAAAAAATCTCTGAAT  
TCTTCGCAACAATTTTCTTCAAAAAATAGCACCAGAGGAGATAAAGAGATTCATATTTTAC  
AACGAGTTATATAGTTAAAAAAATATATCGATCTTCGAATTATAACGTAATATATAGATAG  
TTCAAAAATCCAGTTGTTAAGTTGATTGCTTAAAAAGTAATGGATGGCATCGACGACGTT  
GCTCGATATAAATCTACGACGAGCAACAAGCTAACATTAAAAAAGCTACATTAAAAAAA  
AAATAAAATAAAATGAAATAAAAAACTAGGG

113. >MSTRG.2199.1 Gene=MSTRG.2199

AGCGATCCTTTGTAAACGTGAACGATCAAAATTTTGTTCCTTTTTCTCCGTACATAATTTTC  
CTTTTCCATCTTCTTATTTTGCTATCGTTTTTTTCGATTATACAAGAAAAAAAAAAAAACAATT  
GGTGTTTAATTTACGCGAATTGTGCGGACGATCGAAAGCGAGATGGAGAGCAACATTCAGT  
TCGACAACATCAGTTTAACTCTAAAGTGCAAAGTCGGCGAACGCGGTCTTAGGTCGTCTGA  
GAGGAGGCTAGCAAGCAGCCCGAGCTCGACACACACGAAGATAGCTTTTATGACTTGCCT  
GCGTCCTTCCAGGAAGAACAATCGGTCAAACCGAATATTCGATTCGTCTTCTCGGTCTTCCG  
TTCGTCCATCGACGCGGATCATGCGCGTATCCCACGCTAAGGTCCGTGTTTCTCTCATCGTG  
AACCTCGTTTTCCGGGAGAGAGAGAAAATCGAGGGGAACACCGAGGGGAAAAAACACGACT  
ATATTTTACAAGAGGAATAAAAGACGAAGATAGAGAAAAATAGAGAAGAAGTGTTTCGGT  
GACATGCGACACACACTGAACTCTCCCCACACCGAACAGATTTATCACGTTATCGATCCTTT  
TGTCGCGATGCTTCCTTACGGAGATCTGTTTGTGGATCAGGTCGAACGGTTTCGCAAAATGG  
TGGACGATATTGTAGAGTACGTATATTTCGTGATCCGTGACCGATGATACGCAACGCGAAC  
CATACGATTCGCGCGCGTGTATATCGCGCGAGTATATTGTCGCCATCGCCGCGGCAACAAC  
AACAAACAACAATTTTCGTACGATTGCGTCGATGATAATGACGATGACGACGACGACGACT  
CTGTTTACTCTGTTACTGACTGAACAAAGTTTACTGGCTATGTGTTTACTGTGTGTGTG  
TTGGAAATTGGCAATATTTTCGTATTTGCTGGCAGTTGGCAGAGAAGTATTAATGTAGCATTG  
GCAAACCTCTGGGGTCGGCTCGGCGACGGTCTCCGCCCCGGGACGTACGAACGGAGCGGCC  
GCTTGGCCTAGTCGCCGAAACGACTGCAGGCCTTCTTCCATTTGCACTGTGTGCACCATAGG  
TCGCGATGCTCCATACCGTAGACCTTGCGGCACTTCTTCGTCTCGCCGCGAATCCGTCGGGG  
CGACGATGGCATCTTTCCCGTGGACACCGTCAGCAGGCCCATGCTCTGTTGGTACGCCTGG  
AATGGCCTGGGTGACAACCTTTATATGCTTGATCGGTGTACCCGGTGATTGCGAAGTGCGCA  
ATGCGATTTCGTTCTCTGATGCTCACCATCATGCTTTCTGCGTTATTGGTGGCAGAAGTGGTTT  
CCAAACGAAGCTGTTTCTGGTACTCTGGATCCTCGTGAGGAGGTCTGGCCATGTCCCTGTGC  
GACATAGTCGGCGGAGAGCTCATATGATCCACCGCCACCTCCTGATAGTAGAATTCTTCCT  
CGTGATCGGAAATGTCATCGTCTCTTCGTTATCGTAACTGTTAGTCTTTTTAGGTCCTAAGT  
GTGATTGGCGCACGTGCTCCTCGATAAGCGGCACGGTCGCCTTTATTTCTAAACAACCTGGC  
CAAGTACATTTAAATACTACCGCTGCATTAGCCTGTTTCGTCTCGTAGACGGCGCTGTTAGC

TGGTCCATTCTCGATCGGGTCGCGGCTCACTTTCGCCCCGATCTTCTTCTTTCGGGGGTGTTG  
 CTCCTCGAGGTAGTCGGGCACTATGCCCTCGTCCAGAGTGGTGGTTCGAGCCTGGGGTGCTG  
 CTCGACGACGATCCGGACACGTTGTAAGGGTAGTGCTGTTGATTGTGCGAGGAGTGGGCCG  
 AGGTCGGCCACAGGGAACCTGGGCGCCCCCTCGTCGCTGAGGGGGGGGCTCGGGGTGCCGC  
 TACGCCACGAAGCCCCGCTGCTGCTGCTGCTGTTGGACGTGCCGCCGACTCCCGGCGAGCC  
 GACCACCATGCCGCCACCTCCGCCTCCTCGACCTCCCCAGGAACCGTAATTATGTTGGCAG  
 TGTAACGGTAAAGGATTGTGAGGGCTGTGTGGCGAGCACGAGAGCGACATGAGAACTAGC  
 GCGGCTGTGCATTCGTCCATGCAGTCGCCGCGCTCGTTTGTGCGACACCCCTCGCGACCACA  
 TCCGTGGGGTATTCGCTCGCTCCAACCGCTGAACGATCGTTCAGAATCGTTGCTCGAGCTGG  
 GTCGCCGCTTCTGGATCCAATCACGTGTGGCACGTTCGATGGAGTGGGAAGATGCCCGTTTT  
 CGATCACCCGCCATATCGGCGAGCCTAGCGAAATCCGTGTCCTGATCGGCCAGCCGTGCGC  
 TCTTACGCGACTCCAGCAACCTGACCTCGTCTATACGCTTGGTTCAGCCTCATCGTCTCTTGA  
 CCGTTTGGTGCAATTATAACATCCACTTCGTCTTGATGTTACGATGTTGCGTGACCTCCGCG  
 TGAATTTCCCGTCCGTTATACGTCAAATAGACCTTCTGGCCGGGCACGAGGCGTGCGCTGGT  
 TACGGAACCGAAGCCTGGTCCGATCAGGTCGCGATCAGAGTATTCGGTGCTGGGACTTGGC  
 GGACGACCGCCAGGCACGGAATCGAAGCGTACGGAATAACGAGTCTTCGGTGTAATACTG  
 AGGCCTGACTCGGACGCGGCTGACGCCGGCGTTTTTACGGCGTGAATGACGCCACTATAGT  
 ATTTCCCGTCCTGTCCGGGAGCGCACACTCTGGTGCCGATTATGCTACGTTTCGCCAGCCTC  
 TTACCCGTGCGACATTATTCGGTGTTATTTATGGATAAACGATCGTTTCGATCACTTTATTAA  
 ATCGTTTGACGAGGATGCACTGATATTATTTCTTACGATAAAACACCTTATAACAAATCGTT  
 CTCAAAGTATCTCGCGCAAATTGGTATTTTATAAAGATCATTTGCACTACAATTTAACTCA  
 CCCTTCTATTATCGTCTTTGAAATTTTCGTTGATAAATATACGTATACGTATATCGTGAACAA  
 ACCGGAAGCAAATATATATTAATATCACACCAAAGAGAAATAACAATTTACGCGCGGATTT  
 AACAGTTAAACACTTGTGAAGAGACGATACGAGTGTATCTATGATTGATTGGAATATTAG  
 CAAAAAACACTCCCGGAAATAAAACACTTGTTATACTCTTTTTTCTTCTTCTATCGAAG  
 TTCCGTACTGCAACACGGTTACTTTAAGTCATTGTTCCACGATCACTCGTATACACACTGAG  
 GACAGATCGGGCAGTTTTGCGTTAAATTGCAATTGCGTTAGCAAATGCGATCCTAGACCGA  
 AGAAGGACGCGGTGGCCTTCGCGGCCCTGAACACAGAACTCAATGTATCAACAAAACGGCG  
 TGCACCGTTGCCTGTGTTTCGTCACGCCGTCTGCATGTTTCGAGGCACTTCGTGATTGATTTGTG  
 ATAATACGTTGGAGTATACGCGGTAGATAGCATAATATATGACTAATGCTTGCCAGTGAAT  
 AGAAACTCAGCGGAATTCTGTAAGCTGAACGTACAAGCGGTACACGATTTCGATGGTATAC  
 GGACAGGAGTAGGGTCCGC

114. >MSTRG.2242.11 Gene=MSTRG.2242

CGAACTCAAACCTCGGAGGAGGGATCCATCGAAACATCGGTCTGTCGAGCAGTGTCGCCCCC  
 TCGAATCCTCGAAGGGGATTTTCGGAGGTTGAGAAATTCGCGCGAGATAATACGAAACGAA  
 GTCGGGCGGCGGTTCGAGCGGAACAAGTGTTGGTTAAACTGTGATGACCGGGCACCGGTC  
 GGGCAAAGTACTGGAGTGCAAAGCCTCGATCCCATCGTGACCGTCCGGATACCGGTGCA  
 CAGGCCAACGATCGAGAGAAGAGGAAAGAAACGAGCCCCGACGACGATCAACGGACAA  
 ATATTATTCTTATTATCGTTGTTATTACCATCGTCGAGCGTCGGGCCGAAGCGTTGAGGAGA  
 CGGGGTTATCACGACGAGGCAGGAGGCTGGCAGGACGGTGGAACGATGCCCACCACCGGC  
 GTGGATTTCGAGCAGCGAACGCGCAGTTTTTCGTAGGAAACGGGAGCACGGCCGATCACG  
 AAAGCGGCGACACGAGGGCCGACGACGAAAGGAAGACGAGGCGAGGAGGGACGCGGCA

115. >MSTRG.2265.2 Gene=MSTRG.2265

116. >MSTRG.2278.2 Gene=MSTRG.2278

76

CTGATTCAATAATTTTTGACGTAATCACGTTAGATAATTCCTCGAGTAGAGTAAACACAGA  
GAGTATTACTTCGGTACAACCTCTCGACAAATTTACGATTTCTCTTTCCGTGTAAACTCTAA  
ATCTCTAACGCGGTTAAAACCATTCCTCGTCAATTACGGGTCAAATTTGTTTTGGAACAGATT  
CGTGTTACCGATTACAACGTCCTTTTACCGCACTCTATCCTCGTTTTTTTTTTTTCTTTTT  
TTCTCTTTTCTCGCGTTTACCGCGTATGACGCAATCGTTATACGAAACCGACTGTCCCCCCC  
CTCTCTCTCTCTGTTTTTCGATTTTAAACGAGAGAAGGTGAGAGCGTGTATGGGAAAAAGGGT  
CGAAGGACGCGGGGAGGGGGAGGGGGGATCGATAAATATCCCATCGTGATTTTCATGGGC  
TGCGTTGATCGCGCAGCGAGACTTCCACTTTTCTACGGCCGAGAGTTTGCACGATTTCTGTTA  
CGTAATCCATTTATCGGGAAGTCGAGGTTGAGTCGGAGCCGATGTGCGAAATACGACATCGA  
AGGGAGGCGACTAACTCGCGCGCCACGACTCGCGTTTCACAAATCTCTTCGATCGCGATGT  
GTTCTCGTTGTATCGCATTGGCGTGTGACCATTGGCTGCTGCACCATGATGACGTGCCATTC  
ACCGTGAAAACCATTCATTCAAGATCACGAGAAGGAAGGATATGATAAATTGTGGCCGAT  
GAAGAAAAGAGCACGAGCACGAGTACGAGCAGGAGCACGAGCAAGAAGAGCAAGCGGC  
TTCGTCGAGGAAGGCGGGAAGAGGCGACGACGAGGCGGCACAAGCAATACCGATAAAAA  
GATCAACACTAGATCTGATGTTAGCGGACATTAACGGTAACTTGGCGGATCTGAGAAGCGA  
AGCGATGGCGTCGCAGAGGTTTTGTCTGCGTTGGAATAATCATCAAAGTAATCTACTCTCCG

117. >MSTRG.2279.1 Gene=MSTRG.2279

GCCATCGCTTCGCTTCTCAGATCCGCCAAGTTACCGTTAATGTCCGCTAACATCAGATCTAG  
TGTTGATCTTTTTATCGGTATTGCTTGTGCCGCCTCGTCGTCGCCTCTTCCCGCCTTCCTCGAC  
GAAGCCGCTTGCTCTTCTTGCTCGTGCTCCTGCTCGTACTCGTGCTCGTGCTCTTTTCTTCATC  
GGCCACAATTTATCATATCCTTCCTTCTCGTGATTTGTATCGCGTTGCCTCGGCTGGTCACAC  
GAATGTGCGCGCACACATTTACCAACAGAG

118. >MSTRG.2304.1 Gene=MSTRG.2304

CCCATTACTTCCATAGGTACACCAGCACGTCCATGTTTAAAGCATTTTTAAAAGAGCTAATGA  
CGATATGTATACCTGCTCTGCAGTATCAACAACCTGGAGCATCTGAAGGTGGAGGTCCTTGA  
CTAAGACCTGGCATAGCACCTCCTAATCTCAATAATCGATCCATCACTATTTATTTTTATTT  
CTTTTAATAATTCTATTAAATTATATCACTGATTGAAAATACTACGATTTATCAGTCATCCGT  
AGCATTAAACAAACATATCTTTTGTAAAGCTAATGCATTGACAACCTCTCAAATCTGCACACTC  
ATGAGCGCAGCCTATTGTAGCGACTAGCAGTTACAGAATTTTTAGTATCGTTATCATAGTTT  
AATAATAATGAAAGAAGTTAAAAATTGCAATCGTCCAAGATATGGAGGTGGACCGCATAA  
TTTGGGAGATCCAGAAGATAAACATTTAAGAAAAGTAGAAAAAGATGTTCTCATACCACA  
AAAAATGCGAGATAAAGCAAAACAAGAATGTGTGCAAGAGGTTTCATGAATTCAATGTGTG  
TTGTAAAAATGCTAGTTATCTTATGGCATTAAATGTAAGAAAGAACTAATGCATTAATA  
AACTGTTTATCAAAATGGTATAATGATCCAAAATTCAAAGAAGAATGTACAGAAGAATATT  
TAGCAGAAAGAAGCGAGTATAGAAGAACTGGTATTCTTAAAAAATCAAAATTAGGGAGAT  
TTGGATCTTCAAATTAAATTATATAATGAATAATATATTAATATATATTAGTATTGTTATTT  
TTTATTTAGCATATGTAATTGTTTATTGTAAATGAAATGAAGCTATTAATAATGCTATTAAAA  
TATTATAATTATATAAAAAAAAAAAGAATTTTAACTTATGTACTTTATTTACAATTATGAA  
AAATATGTTAAATACAAAATTAACATGAATCATCA

119. >MSTRG.2304.3 Gene=MSTRG.2304

AGCCTATTGTAGCGACTAGCAGTTACAGAATTTTTAGTATCGTTATCATAGTTTAATAATAA  
TGAAAGAAGTTAAAAATTCGAATCGTCCAAGATATGGAGGTGGACCGCATAATTTGGAATT  
CAATGTGTGTTGTAAAAATGCTAGTTATCTTATGGCATTAAATGTAAGAAAGAACTAAT  
GCATTAATAAACTGTTTATCAAAATGGTATAATGATCCAAAATTCAAAGAAGAATGTACAG  
AAGAATATTTAGCAGAAAGAAGCGAGTATAGAAGAACTGGTATTC

120. >MSTRG.2322.1 Gene=MSTRG.2322

ATTAGGATTTGAACTTTTTTTCTATTCCTTTCAACGATGAAAATGAAAACTCGAAACACCG  
ATAATAATAAATCATCGAATAAAAAATTTAAATTTTTTCGATGATTTATCGATGAAAAGTTTCG  
AAAGCTAATTTAATATTTTCGATACAGGAACGATATTCCAAATTCGTTCACTCGTGGAGAAA  
TAATTAACTAATGACGAAAAAGAGGTTATTACGCAAAAGTAAAGTAGGTTAGGTTAAGT  
AGAGTTTACGAGTCGCGGTTGATCGTCATTTCTAAAATTGGCAATTTGATTACACAATCTAA  
TATAATACTCTTTGTGTAACCTTGGCCGTTGCAGTTAATTACTTGTGTAATCGAGATTTCAAC  
TCCTCTTCTATCTTTTCGATATCCTTCAATGAAGAACTCGAGATAATAATGAATCATCGAACA  
ATAAATTATTCAACTTTACTCTTCGTTTGGGACGAAAAATATGTATTTTCGAACGGGTAAAT  
AAATTTAAAAATTCATTTTCGACAATTAATAAATCTCTCGTTTCGTTTCGATTGCTATTGCGCA  
ATTGCGATAAATTTCCAATTTAAATGGAAAAAGAAAATTTTTACCGCTCGTTAAATTCCTTC  
TCGCGGTGTACAACGGCGAAAATTACATCCGAGAACTCGTCTCCATGGTCGAGGCGAAGA  
AAAAGTTAAACCGAGAAGGGAAAATCCCCTCCCATTTCGTCTCGGTTGCCGCCGTAAAATTC  
CTATTAGACGAAGGAAGAAAGCCGCGATGCTAAAAATCCCCCTCCACTAACGAAAATAT  
ATCGTGTTGGGGAATCGACCCAACCTATATATTCCGATACATGTATAAAATATCACGCTTGC  
GTAAATATTAATATTGATAATTAATCCCGTCGAATCAATTAATCCTCTCCTTTTGATCGGGTT  
CTCTTTGAAAGGGAGCACGAAGGATCCTCGAGGGTTTTAATCGAACGAACCGTTTGCTCGG  
GCGGCGTGGAATATGAGAGAATTCGCGGGTAAACCGGGTATCCTTTGATCGAAATATTCCC  
GAAAACGTGAAGGCAATATGACCGAAAACCTTGATCTTCCATCCATGTTTCGCTGATAACC  
GCGAAAAGTACAGCCAAGTTTTCAACCGAGTTTCGAAAAAAGAAAAAAGAAAAAAGAAAA  
ATCAGCTTTTCATTTGTTTCATTTTGTTGTTAAAACGCGACAGCGACAGCGAAAAGTGATTTT  
CGTTAATCCTTGGTATTACGGATTATATTTGATGTAAATTAAGTAGGTGTTTGTTTGACA  
AAAATAAATTAATGAATAAACAAAATGCGCGAATAAAAAGGGCGTTTATTTATAAATCTAT  
AACGTCAAAAGTGGGAGCTGTCAGCGGAGAAAATAAAATAAGTGAAATATTACAGCTCAC  
CTCTCGGTTTTTCAGTTTTATATATATACAAGCGCGCGTACGTGGCGGTGCGTGTGAATTTCA  
CTTGAAAAATTAGCATCAATTTGTAACCTCGGTTCGGGAGGGGGGAGGGAAAAACAAAATAT  
TCTGTCCGAACGGTAATTTAAAATTTTCTGCGAAATTCTCGACATTATTCTCGAATGGGCGC  
GAACAAACGATGAACTACCACGTTTCGCGCACGAGAACGTTTCTCTTGAATTTAAAATCGGT  
AATAAACGTCGTATCGAGATATATAAATATGCTCGTTTGTTTCGAAGAAGAACGAGATTT  
AGAAATGACAATTGTTTATCTTCTCTTCGAGAGGAATAATCAATTGAAATATGACGTGAAA  
CGGGATGCGTAATTTATCTTGATAAATCTATCCGTGCATTTTCGATCGAGATTGAATAACAAG  
GTTTTCATTAATTTGTTTTCGTTAAATGCGCATGCGCGCGTTAAAACGATTTATCTATGTCGA  
AACGTATTCGCCGATTTTCGGTGGGTTCGCGCGTATATAAATACGAACATGGATCGTAGTATC  
GTGTTGTGTAACCTATATGTGTGTGTGTGTATATGCCAAGTATATCCGAAAGGTGGAAGGGG  
AAAGTGACTTTGGGCATCTTATCTGGATATTTAATCTTTACGATGCTACCTTTACCACGATAT  
TTCAAATATCGAAGAGAGAAGAAACGGACGGTTTTATTAACCGTAGAGAATACCTTCTAGA  
AGATTTCTTCTTTATCTTCGAAAATTGCGCAGGAAAACAAAGCAAGCCAAGAACATAATTC

GACGATGGTACGATTTTCTCGATTTTCGATCGAGAAAATGTATCCTAAAAATTGCTTCTGGAT  
TAGAAATTTATTAATAATTTTCTTTTTTTTTTTTTTTTTTAAATTAATCTACAAGAGTAGAGCT  
ACTAGTAGAGATCGTAAAATCTTACGATCGTGAGGGAAGGGAAGGGAAGGAAGACCTAC  
CCACGATGTTTTGTCGTTATTTTAAAATTCATAGTTCCGGTAGTTTACGCCAACTGGTTGGTT  
AGACGACGCGAAAAAACCAGCCACGCGAGCGAAAATTCAACGCAAGCAAATCCCCCCTCT  
CCCCTTTCTAATACATCGAATCTGTCCATCCGCGTGGATTAGACGGATATAGGCGTTATTCT  
CGGCGCGTGTTAATTTTCGAGGATGGAGGAAAGAAAAGGAGGGGGGGGGGGGACAAAAA  
GGTACAAAACAAGCGCGTTTCCCTCTCGTAAGGCAAAGAGACAGGCCATAAATAATCCGC  
TTTACAGCGGCGGTGAGTCGTGCATCCGCGGAGGTTTGCCGTTGAAAAGTGCAGCTTGCAT  
CGATGCGCCCTGTTATTCCGTTGCAATAAATACTCTATCTCTCCCCGCGCCCTGCGGGGA  
GAAATTAAATTTTCGATCACAGAGCGCTCGATCGTGATCTAGGAGGGAAGGGAGGAGAGG  
GGAGGGATAAAAAATTTCAACTCCGGTGAATTTTTTACGCCGGTGATTTGCGCGCCTCGAAG  
CGAAAATCGCGTCGATTTCCCTCGCCCCTGCGTCAAGGGAGGAGAGAATATAATCATCCCC  
CCCATTTGTCGTTTCGATCCGTCATCCATCGTTTGAATCTCGCGGCCGCGTATCCGCGTCGGCA  
ACGAAGGGACGACGTTTATCGATCGCGCGATGCCGAGAGATCGCGTAACCCATACATATC  
AAAAAGTGTGATACGAGCACAAGTTTTTTGTACAGTATATATGTATACACGCGTGTTTTTTA  
CCATTAAGGTGATTATGGTGTTAATTATCGTTGTTGCGAAATTCGAAACACTTCTACGCAGT  
TTTTAACGAGGTTATTTTGCACGAGGTAATGCAACTTTTTTAAAAAAAAAAAAAAAAAAGGA  
ACGTGAAAAATATTTAAAATAGACTACCGTGTAATACGTTGCGCGTTATAAAGGATCCGTA  
AAGTAATACGTTTGGAACATGATTGTCGCGTCAATTTGTATTTTCTACATATGTTTTTATCTTT  
AATAAGACGTTTTTTCCAAAATAAATATAGCGTATTGATTTTAGAAAAATGCACGCACGCG  
CACATACACACAAACACACATATATATATAGCGCGTTAAAAATTCGTATTACACGGAAATA  
CATCGTACAAATTAATTAATTTTAAAGAAATTTTTGAATGAAAGTTATTATGAAAGTACATA  
TATATATATATACATATATAAATAAACATAGCAAATGTGGTGAAATAATTTATGCAATGAA  
TCGCATGACGAAACAAAGGTTTTACGAAGCTTGTTATCGCTTGTAATACAACCATTGATA  
AATTTCCCACTTGTTAATCGCCGTTGTCAAAGCAAATGAATTTACAACAGGTATACGCGACG  
TTTGACGACTCGACTCTTACGCGTCGCTCAACCGATCGAACATTTCGCTTAATCTTCGACCGA  
CCGAGTAAACACTCTCCCACTCCTTCCCCTTTGAAAAATTAACAAGATCCGTGCCTTACGCG  
AGTCGAGATAACGATCGATCGAATCGAAGTACGAAAAGAAAATATATATATATTTATCGA  
GAGAGGAATAATTGCATTTACGATTTCCAAACTCCTTCTGTATTTTTATAACCTCGAAACGT  
GCGCGTACGATAGAGATGGAGCCACCGTCGCCGCGACAAGAAGAGAAAGAGAGAGATAT  
ATAAAGAAGAAGGAGAAAAAATTACCACAGTTGTTTCCTCGCTCGCTCCTCTCGTTTCAA  
GCTAAAATTTCCGCGGGGAAACGCAGTGGTTGCTTCGGCCTGTATCCTTGCGTCGAGGCGA  
GCAGTGAATTATACCTTATTACACGGCGGAACGGCCCGACTTCTGTAGATGTCGCTCGCGC  
GAATAAATTGTATCTCTGGCGACGACGGACGCAAGGAAACCCAGGCGAGCGGAAAGATTA  
GAAAGGGACGCTCTGGAAAAAAGAAGAAGAAAGAAAATAAGGAGAACTTTACTTTGTA  
ACGTAGGACCGGTACAGGACGGCGAATTAATTCGGTGCATTAAAGCACCTCGTCCCTCCCT  
CGAGCGGCGTGCTCGTTTCAACGTCGTTCAACGTCGTTCCCCCCTCTTTTCCATCGCCGTGT  
GTTTCTCGCTCGTTTCGTCGCTCGTCTTTCTGTTCTAAGGCAAACCGCCGCGACGCTATCGCGTT  
AGATTTGGTTATGTGAAGCGTTCCTTTACGGGGGAAAGGATGGGCCGAGCGCGGGATGCTC  
GTTTGCGGATCAAATTTATCTCTTAATCATCCAAACGGTGTGTTTTATCCCTGCGATTAAAGT  
TGTTTAAGCTTTTTTTTTTTTCTGAATTTTTTCATCTACCACGGAATAGTTTCGTTTTTCATTCCG  
CGATCGTTTTTGCGTACGATAAAGTTTAATTCAACGCTCCAAGGTAAATAGAATCGTTAATT

CCCGCTGTTTCATGATTCATCATTTTCTCGATTTATATCAACCGATCGTGATTAGAAAACGTTT  
TCACTATCCTTCCCCGATTAAATTTTTTTCTAATAATTTTGTTTCCCAAGCTCTACGAATCCAC  
GATTTCTCGTTTCGAAACGAGATTATTATTAATCAGGAAATAATATACATTCTTCGATGCAAT  
TATTAATTTACATTAGAGAATTAATTATTATAAAAAATAAGAAAAAGAACTCGAACTCGC  
TGACGATGACACGATTATACATTTTCCTTGGGCGAGAGAGGGAGAAAAAGTTTTTTCAGGA  
TTTCGGTTGGGTGTCTAGCCGGCCAAGCGAAAAGGCGAACATTTCGGTATCGGGTTGACAC  
GCGACCACCGTTTCGTTTCGTTTCGCTCGCTCGCTCGTTTCGCGAGGTTTCATTAAATACGGAAAT  
AAAGTAATTTTCGCGTGACAGTGGTAATAACTTGCGCGCTCTGATGGCGCGCACGAGAACTA  
CTCCACGTCCACGCTTCTCATAGGAATCATCGTTATCGCGACTTGATACACAGATGGAAGG  
CCGATTATTACGCCATATTGCGATCGCTGGCGATCTTCGTTTCTTTGACCGCGTTAACGAAG  
GAAGGAGAATTCTTCGTATAAGCTAACCGTGTTTTTTCGTTCTTGGATCTTTCGACGACTCGG  
TTTCTCTACTTGGTTTTTTTTTTTTTTTTTTTTTTTAAATTTAAAAGGAAAACGCTAGGTCTTT  
TTTAATTACGTTGAATAAACCGCACCTTTGTTTCGTCGATTCGTTGTTCCAGTTCTCTTCTCCT  
TGCTACATCTTTGCATTCAGTTTTCCATTTACTATAATTTAATTTGAAAGAAAAATACCAGT  
ATGTTTTAGCTGCGTTGGATATGGACGCCGCTCGCCCGATGCTTCTTTGTAGATTTTCGTTCT  
TCTTTGCTACATCTTTGTAGTTTTTTTTTTTTTTTTTTTTTAATCTTATCTCGATTTCGAGGAAAA  
AATTTAAAGGGGCAAAAAATCTTTAATTACAGTTGAATAAACTTCGTCGATGTATTTTTTTT  
TCTTTTTTACTTGATTTGTTTCTCAATTTAAACGAAGAAAAAAAATTTTAACTCAAATCCT  
CCGGTCGAGGCTACTTTTGTCTTCTTTGTATTCCATTTACTAGCTTTTCCAATTTGATTTGTC  
ACGTTTAAAGGAAGAAATGTAAGATCTTCTAATTACGTTGAATAACTTTTTCTCGATAATT  
ATTCTTCTTGTTAGATCCTCCAGTTGCTCCATAATTAATTCTTTACACTCCTACATTGTATTC  
CCTCGAATCTCGTTTTCTCACATTTTAATTTAAAGAAACAATTTCAAACCTCTAGATCTTCTTG  
CTAGATCCTCTCTGTATTATTAATAATAATTCAAGGGCAAAAATTTCTTTTACATTAAATTTTC  
TTACATTTTAAATAAAAAAAATTTCAAAAATCTAGATCTTCTAGATCCTCGATTTTTGTATTA  
AAAATTCAAAAAATTGAAAATTAGTCTAACTAAATGTTTTTTGCAACTGGATTCTCCTTTT  
ATTTTATTTTCATATTTTAATTTAAGAATTAAGAAAAAAGAAGCTTCAAACCTCTAGATCTTCTT  
GGATCAATTTTATCAGTTTCCCACGTTAATAATAGTTTCGAGGGAAAACATGGGAGAAGGTA  
GTTGCAATTACGTGGAATAGGGAAAGCGAACATCAAACGTGTCGGATTACAGATTTTTCAC  
AGGGTTTGAACGGGAGTCCCTTTTCTGCCCTCACGCGGCCGCCATGTTAATCACGATATAA  
CGGTGGATGACGTAACCACCGATACGTGCGGATTAAAAGAACCTTCCAAGTTTTTCCATTTT  
GAACGGTGTCGGGTTTTAATGTGATTGAATCACCTTATCGCCTAATCCTCTGATTAGGATAT  
TTTATCATATTTTATCAGTGTTCGATGAAATTAATTTCTCCCTCGATTTTCGATCGAATTTTTG  
TTAAAAGTTTTTTAAAGGAGAAAAAAATTTCAAAAATTTACAATCTTCATTATCAAATTGTAA  
ATATTGAATTAATTAATATTAATTTTATCAATATTAATTTTAAGAAATTGAATATTGATTAA  
AGGAAGGAAAGGATGTTTATAAATATTTATCGTTTGAATTTTATTCTGAAAACGTTTTTTCG  
ATTCTCGAAATTGAAATATTATTGTTTCGTTTCGAAACGAAATGAAATCGTTTCGTTTTCCAA  
GTCGAGAAGCGTCGAGGAACATTATTCGTGTAAATTAATTTTCATGATATTTTAATGCTCGT  
GTTTCATCGATGATATTAACAGGGGAAAGTGAGAGTTATAAATTGACCAAGTTGAAAAAG  
TAATCGGTTTAAAAATCTCGAATAAGATCACTTCGAGTAATTAACCTTGTTAAACGCTCGA  
ATAAAGCGTTTATTTTCGTAAAGCGAAAAGTTGTTTGTCTATTATTATTATTGTTATTACGTTT  
CGAACGATAAATCATCGAAGTAACTTTGTTCTTGTAACCTTTAACCTATTAAATTTCCGTTGT  
CACAATTTTGAACGAAGAATGAAGATACTTTGAAGGAGAATTAATTCCTTTTTTCCCTTTTCC  
GGTTGAAAATACGAGCGAAATCGTATTATTTAAAGCCCTTTCACGATCTCTAATAAATTCTA



GCAATATTGTTGCGCTCGAATATCTCTCTCTCTCTCTCTCTCGTTGCGCGTGGAGAAAACG  
TTACGAGACGCGCCAATCAGAGACGTCCAATCACGCTTTAATTGTTCTTCCTTCGTCCTCGA  
GCCAATCAACTCTTAAACCAGCTCGCGACTAAAAGTTCTCGATGCTCTGCGAGATACCCC  
CCACTACTACGTGTATAATATCGTGAATACACGTGGCTGGTTGGTCCTCTCCAAGGCGGTGG  
AGGGGGGATCGTTAGACCGGCGTTTGTTCAAAACCCATCCGAAAACCTCGTCCAATCGTA  
TCCTCACAGTTGCCGTGAGAAAATCTTGAAGTCTTTTCGTCATCGCGTAACGCGATACGCTT  
TCGTAAAATAATTCACCGAGGATGTTTCGAGAAGCGTTGCGAAAAGTCAGTCGAATCTGGA  
ACCCGCTCGCGCGTTGTTACAATTTTATCGCTAGTGAATTATCGTAAAGTGAAAATTTCTCC  
AATTATTGAAAATTATAATTACTTATTTTTCGTTCCAATCGTCGAAGGATGAGGATAAATT  
TCGTTCTTGGATTTTCGTCTCGGTCGTTCCATCTTTCACCTGCTTCGCGCTTCTCCTTTTCCT  
TTCTTTTTTGTCTTTCAATCCAAAGCGCAATCGGCCACCTTTCTCTCTCTCTCTCTCTCTT  
CTCCTTCAATCTAGCCACGATAAAAAGCCCCACTTTTGATCTCTCGAGGGTGTGTTGCCCCC  
CTTTTCTCCATGCTAGTTACCCCTTCTCCATACTCCCTCCTCCTCCTCCACCACCCCTTTC  
TCCACCGTTTCTCGACCGTTCACCTTCGCCTCTTCAACTCTACGTGCTTTTCTTTTTTTTT  
TTCTTTTTCTTTTTCTTTTTCCCTTCCGCCACGGTGCCCCCTTTCCCCCTTTCGACATCGCGA  
TGTCCCGATTCCGCCTTTTACACCTTCTTCGACGAATATTCTCCTCTCCCCCTCCTTCCATAT  
CGAAAAATTGGCCAGTTAAGAAGACTTTCTCAAACAAAAAATCGAATCGATTACGAACGT  
GACGAAGATAGATATATTAGATTGGAAGAGGATCGTTTCGAAAGTTATTTTACGAGAAGAA  
ACAAAGAGAAAAGAAAGGAGGGATGTTTAAAATTAGGAGTGTAATTCGGTTTCGACCTTG  
GAATATAAACTGGATGGACGTGTCTCTCTCTCAGTTTATCCCTTCTATTCTTTTTTTTTTTC  
TTTTAATCGAAACCTGTTACAACATCTGAAGCTGAAATTGAACTTAAATTGGAACATTAAT  
AGATGGAATTGTAGAACGGAGACGCGAAACTCGGTCAATCCGCTCCTCGATCAATTATCGT  
TTTTACCGAGCTACGAGGATTATGCGGACCGATGCAGAACTTTTCTTTTTTTTTTTTTAATT  
ATGAAAAATCAATAAAAAATCCCTAATTACGATAATTA AAAAGTTGAGAGAGATCCTCTAT  
TCCCTTTTTCTCGTAAAAAAAAAAAAAAAAAAAAAAAAAGGTATATCATCGTCAAAATTTA  
TATGTACAATTGTAATAAAATTAATCGTGAGCAACCGAATCGATGATCGAGATAATATTG  
TATTGGAATTTTCGCGGAGAGTTAATTTATTTATTTATTTATCAACAAGAGGAGGGG  
TCCGAGACGGAGATAAAAAAGCTCGTTGGATAAAGGGCGTAAGAGGAAAATAAAGTTTCG  
CGGCCATTATCGTCGCCGTCTATATTTAATCGGGTCGCTGCGGGTACAATAAAATTGGCCCC  
ATCGATTTTCCATTAATCGGCCATTAGTATGCAATAGCTAGTTTCCCGTAGTTGTACGAGA  
AATGACTTTGGTCTCGTGAGATAATAATAAGGCGGCAATAGTCCCGCGAGGACGTTTCACT  
CTATAAACCGTGTCTGTGTATCCACTGACCTTTGAGAGAGAGTGTTCTTTATCCGTCGAATA  
ATGGGCCGTATAATCCGACGTATTTGCCTTATTACCTCGAAATTGCGAAAACGCCTTTGCAC  
GCTCGTTCTCAATTACCCCTTCTTCTTTTCGCCTCGCTGCCTACCTTCCACCATTTCTAAA  
AAAAAAACAAACAAACGAACTAGAATTAATTTCTTGAAAATAATTCGTATTCGAGGGACG  
CTGTAATAAATTTTATTCATGTGATTTGTTAATAAATAGATTTTAGATTTTTTCGATGTTTTGT  
GATTGTTTTGCTTTTTTAATTCTTGCAAAGTATTGAATAATCGTTTGGGAAATAATTTCAATTC  
TTCACACAAGTGTGCTAGTCGAACGTTTCTAGCCAACTTCGTTCTAAACCATGGAAAGT  
AATTTTGTTCCTTACGAGTATTGCTAGTTTATCTAACCAACTTCGTTCTAAACGAAAAATAA  
TTTCGATTCTTACACGAGTGTGCTAGTCGAACGTTTATCCGGCCAACTTCGTTCTAAATCA  
TGATATTCGGTAAGTAATTTTGTTCCTTACACGAGTGTGCTAGTCGAACGTTTCTCCAGCC  
AACTTCGTTCTAAACCATGGAAAATAATTTGTTTTCTTACGAATGTTGCTACTTTATTCAAC  
CAACTTCGTTCTAAATTGTGGTATTCGAAAAGTGATTTTGTTCCTTACACGAGTGTGCTAG

TCGAACATTCATCCAGCCAACTTCGTTCTAAACCGTTGTGTTGTTATCGTATATTTTGAGCGT  
TTCATGGTTTATTTATAAGAAAAATTCGTTTCGATTCTGTGCGGTTGCGTTTTTCGCGCGTGAT  
AAATATGCAAGAGGAGTATTTTCGGCATAATTTTACTTTTTTATTACCAAAAAATAAGAATA  
TTGTTTCAGATAGGAAAAAAGTTACGTGAATTCTATGGAGAAGATATATTAACGGTACGCCA  
GTGTCAAAAACCTCGTGTTCAAAATTTTCGTTCCATCGTTAAAAATGCGCCACGAACAACGTC  
TCGAAAAATTGCTAATTTGACTGTTTCATAATCGCGTGAAACGAGACTTGGTGTTTCATTGTC  
GTGAAAAAAAATTATATTTCAAACAAGTTAATCGTTGCACGAGGTGCATCGTACGTGAG  
ATAAAGTGAATAATTCGCATGGAAAGATTGAAATTAATCAATTTACACACGAGGAAGAA  
AATATTTAATACGTGAGGATAGCGTGCCAGGAACTCGAGAAAATTGAAACATCCAAAA  
CTCGCCTAAATGCCCCGACCTATACCCGTGTTGACATTTACTACTACCCGCTCCTCATTGTCA  
GGGATAACTGTTCTCACGTTTTTGGCAATTTTCCAGAGCTCGTTTCGAGCTCGTTCCAACTCGC  
TCTTCGCAAATCATCCCGTGGCCAACTGTTAAATAGTTATGCACAGACAAATTGCTCGGC  
ACAATACAGCTCCTCGTTGTCCATGGAGAAATGATAACCGGATTGAATCGATCCGATTATT  
CCTTTCTCTCTCTCTCTCTTTTCTGTTGCTTTCTTTTACGATTCCGGAATATAAAATATTGTT  
TCTTTCTCAAAGAAATGTTTCGACTCTTGCGAAAAAAGAAAAACATAACAAAATAACGGG  
AAGAAGCGAGTTTTATATATAAAATATTTACGAGAACGATGACGCAAGTTTTTTAATTCGTC  
GTCGAATTCCTCGTGTTTGTGTCTGTGTGTGTGTAATATTATGAAAAACAGCGGAAGC  
CTCGGTATAACGCGTCACGTGGAGGGAGGGAGAGAAGGGAATTTACATTTTCTACGCGTGA  
AGCTGCGCCCACTTTGTACATGAATAATTGAAACGTGTCATGAATCAACTGATTTCAATTT  
CAAAAACATCCAACCTTACGCGCACGCGCAACTCCACGTTGAACGTTTAACATGCAACGC  
GTATGAAGCGACGGGGCAAAAAGATGGATTAAAAAAGGCAAGGAATAAAAAGAAGAAG  
GAAGAAAAATGGAAAGTCTGATTTAGTTGAGAAGGATGGAGGAAAATTTAAAAAAAATTA  
AGACGAAAGATTGGAATTACATCTTATGAATTACAAAATTCCTTTTGATCCGAAATATATTT  
CAACGGTATATAAATTTTTACTTTGAACGAGATCTGATCTTCGCCGCGTCTACACTTAATTA  
GAAACCGCGATTAAATTTCAAGTTACCGACCGAAGAAAATCTATTTATCCGACCGGGTAAAA  
CGAAAAACGAAAAACGTGAATACGTGAATGTGCGAATAGAAAGAATCTTGGCGAGTTTAT  
TCGAGTGAGAATTTATTCCTCGTGATAGTTTAACGATTGCGTAATAATATTTTCGACCGTAGT  
AATAATACTTGGAAGAAAAATCGTGAGGCGAGAGAATTGATAAAATCTTAGTCATGCGA  
CTCGACATTTGTTTCGATCGGTCAAATTTTGCATTCGTTCGGCAAAAAAGTCACGAGCTCTCCA  
ACTTCAATTTCCACTGGTCGAGAGCGTTTCAAACAGCCAACTAGTTTCGCAACATTTGTTCC  
TCAACTTCGATTTCGATTTCGATTTCGAAAGTATCGTTTCACAAGGGTGAGGTTTCGACGAGGA  
GAGAAAACAATCGCGAGCAATAACGCGGAAAATATTTTTTTTTTCCCCCCCCCTCGTAACT  
TCGGACGATTTCACTCGTGAAATCGACTCTCGATCTTCTCTCTTTTTTCGTTTTCTTTTATTTTT  
TTTACTTTGAAAAGAGTTTACGCAAGTCGAGTTGTCATCTCGCTCAACGAGAGAGAGAGAG  
AAAGAGAATCCGTTTCACTTCTTCTCGTATTGGAAAAGCGCGGTGGCGCACCCGATTTCGCG  
AAGCTGGGAAACAGAGGAGTAGGAAGAGGATCCTTTTTGAAACGAATCAAGGACACCACT  
TTACGCGAGCACAATCTTCAACCGAATCTTCAAGTCTCTTGCCTTTTTCTCGAGATTTAAAT  
GATAGTCGAGGAAGAAAGAATTGTTTCGTGAAAACGTCGTTTGCTTCCCCATCGAGAGACG  
TTTCGTACCTTCAACGGAAGTTAAAACTTCGAATAGACGTATCTTGATTCCGAATGTTGCC  
GCTTCAAGCTTGTTCTTGGCATCGAAGCACGAGGATGTTTATGGAAATGTCGTATCTTTGCA  
TTTAACATAAGATACGAAAGTTGAAAAATGGAGGATGGAAATACGTTTCTTTTTACGAGTT  
CTCTTGACGAACAAGCTTCCATTCCACATATATATATATATATTAATCCCGATATTTCGCC  
GTTATGATCGATTATTTTATTCGATAAATGGATCATTTTATTATTAATTCGTTCTGAGAAAGT

TAGCATCTAATAAATCATTCTTTATCCAAAATCGATCGTTTTAAGCCTCGACGGTGAATTGA  
 ATGCGAATAATAGAGTCTCGAAGAAAATTATCCTAACGCAAAGAGAGAGAGATAGAGTTA  
 TCGAGTGTGAGTTAAATCGATCGGTTTGCGCGTCATGACGTTGACCAATAATTTTTGAACG  
 GGATAACAAAATTCCATCCGTCGGTGAAATAATTTTCATCGCGGTACGGAACGGTGGTACAT  
 TTACGGGAATTTTAATGGTCAATTGATCCTCAAAATTGTCAAAGGAGGGCGTGCAAACCTCG  
 TGTAAATCACGTCGATAAAATTC

121. >MSTRG.2343.1 Gene=MSTRG.2343

AGTTGGAAAGCAGCGGCCGCGGGGATCGCTGTCGTAGCTGGGCCCCGCAAAGATTACGCA  
 TCACGGCCGGGTAGGACGCCATATTTTCTCCTCCCTTTTTGCCCGGTTAACCGTGTTGCGCAC  
 GTTAATAGGGGAAAAAGTTAAAATTCCTATCGATGGACGGGGATGAAATTTCCATCCCGC  
 GCAAAGGAGAAAGGAATTTTTGAAGAAGGAACGATAAAAAGAATTCTTTCGACGTGATTT  
 GCGCGCTTCCGGGAGAGGGATGGATGTTTCCTCGCGGAAATGACGGAAAACGTGGCGGAA  
 AGGAAAGAACAAGGATAAGAATCGAGG

122. >MSTRG.2366.1 Gene=MSTRG.2366

CTCTTCGTGAAATCATTCTTTTTTCATCTGATAAAATAAGATGTAAACGTGAAACGGTAAAAC  
 AAAAGTTTCAAATTTTATATTTTCCCTCGATACGTAGAAATTTAATAGATATCGGATTTTCA  
 ATGGTACAAACATCAAAAATCCATTTAACTTTGTACTTGACGAAAGTTTCTTCCACATTTGG  
 CAGCGGTCATCGATTTCTAACGACTTGGTAAATCGTTTTAAAAGTTATTTAGCTATGTGGAA  
 GAGTCAGAAAAACGTGAGATTTCGTTTGAATTTCTGTACGCTAACAAAGGAGAGACCAGA  
 GAAACGTTAACGTAGACGATGTTAATCTATCATCAATTCGAAATGGACTACGCCATTTTGT  
 CATGGCGGCTATGCTTTATGTTTCTCGCCACGCCTTGCACTCTACGTTTATTAATAATCCAG  
 TGCGAGGACGGACGAAATGGATAGCTACCAAAGGACTGAGATAACCCTCTGAATTTTCAA  
 AAGGATAAAAATAACCAGGAAATCCTCTTCGTGGAATGTATTCAATTGGTCCTATATTTTCT  
 TGATCTGCTGGATTCTCTCCCTCGCAAGATACCCAAATTGTGTCAAGCTGGTAAGTATTTTTT  
 AATCCAGTGATGTGCTCTTTGAGATCGATCGGCATGTTTTGAGGTAATGAATTCGTATCGTT  
 ATAAAATTCTGGTTTCCAACCATATATCTTGTTAAGTTTAAGAAATATACATGGAGCGGATT  
 TATGGTAATTATATTTATTCTCTTTAGTACAAGGATACCAATTTTAAACATCAACGTCGCACA  
 CTTTACCTGGAGGTGGTGGTTGATTGTAATCACATTTATTAATATTTGCACCGAGACCAGGA  
 ATCGAACCTGGCGTTATATAATCTTTTAAGAACGATTCCAAAGAATCGATCCAATATTTAAA  
 ATTCTCGCTATCGGTTCTCTGTACCAAATTAACGTACTCTCCACATTTTCTAATGGCGGTTG  
 TGGTCTAAATCCTAATCCAGGATTTGTCCCAATTATCGAACGTTCTAGTTGCCATCTTGGTAT  
 CCTTGGATCTAACGTTTGAAAAAAACCCCAAAAACAAATTGCAACCAGTGCGGCTAGCAC  
 CCCGTAAAATATCAAATAGAACAAATCCTATTTTACCCCACTACTAGCTGTTCTGCCTAAAA  
 AGGCACCAGTTTCACGATTGTAAATAAAAAGTCTTTAAAGACTGGCTGGTTGACATACTCGG  
 CGGTTTAAGATAAGGATTTGCCATCTCCGAGTGACCATTTTCGAATCCTTGCTGACCATTG  
 TGTTCCCAAGTGAAAGACTTTATATAAGATTTACGCACTAGTCACGTTTTTCAGATTTTCGAA  
 ATTATAATTATGGCAAATGCACGTAATATAATCCAAAATGAAACAACACGATCGACAACA  
 CCTGCACCGAACTGTGAGTTCTTCG

123. >MSTRG.2369.1 Gene=MSTRG.2369

CACATAAATAATTTTATTTCTGATCACAACCTACAATTTCTAAAGAAAAACAACTCGCGAG  
GCACGACTCGATTTATACCGTTCATAAATTTCCGGTAGATGCTATTAATAATATACGTATAT  
TAACGTTGTGTACCTTTGTTGCCCACGCACATTCACATGAAAAACCTATACAATTAAGATA  
TACAAAATACAATAAAAAAATTAATTTCAAATAATTTAGTATCTAGTGACATTACACGCAA  
TCGCTCCTCTTAAATATTCACAAAATTTGTTCCGTTAGCACTGATTATCAATACTGTGAATCT  
TACTTCTGTGAAATAATTTAATTCGGTCCTAAGTATTCGTTTTACGAGGTTAACAACCTTAACA  
AATTTTGAACCTAATCTTTCACTTGACTATATCTTACGTATAAAAGTCTCCTTTTTTTCCCTC  
CTTCAAGGTATCGTAGTATATATATATATATAAAGAAGATTTTAGCTTCTACGATGATTG  
TTCATTTTAGATTTATTTGGCAACCGTAGAACTTCCGCATAAGACATTTCTAAACGTTTTAGC  
CGGGCTACTTCGACCGACGCTGTGCTCGGTTTATAGTCTCTGTACTCGAACTGTTGTTGTGT  
TGACTACTGTTGTTGCTGCGTTATTCGAAGATTTTGCGGCCGAATTAGGAGGCGAGTCTTT  
CGTTTTGTTTCGGATAAGCGTACCCGTTGCACGTGCCGCCATTTTGATCGGCGATCGTAAAAG  
GTCTGAATTTCTTCTTCTCCGCTGTTTCGATTCGATGGAACGAACTTGGGATTTGTCGTTG  
GAATCACATCGGGCGTCGTTGGTCTAATATCGTTATACGTTAACTTTTTACTAGCGGAAGAA  
TGTTTTTTCGATTTCTTTTTACTGTTGAGCATTAAATAATCCGACCGATTCACGTTTCGAATTA  
TATTCTTCCCGTTCTTAGCAAGTGTCACCTCACCGTTTTGCTGTTTCGTTTACCCCGTTCGATGA  
GATTTGTACTATATACGGTGGTTCGGATACGGCGGATGAAAAATAGAAGAGGAAACGCT  
TTGATTATCGTCGGTGGTTTCGCTAGGAACATCTTCTGTAGCACGGATTGTTGCTGAGAATT  
GTTTCGTACTCGTGGAATCGTCCAATAAAGGTAATTTCTCGCCTTCGTCCTTAGCTTCCGCCGC  
TCGTTTCAAGACTCGGAATATTTCACTGAACAATTGTCTGTACTCCGGCGTTTCCCGGAATC  
TACTCTCGAACGGGCTGTTGTCGTCGTAAATGCTGAACTTGCAATCCTCGCCGTCCGCGAAG  
GAGAAAAGAAACGAGCCGGGCCTTCCTTCGTTTTGCGTCGCTTTGTTACTCGTCTCGTCCAA  
AAAGCCGGAAGACGACGTCTCGGCCTCGGAAAAATCCGTGGGCGTGCGGAGAACACTTT  
TTTACCGCACATCTCTGTTTTGGCACGTGTCGCGTTTCCAACGGCCGATTCGCCGCGTTTCG  
CTCTTGTGCGTCTCCGTCTCCAACGTCCGACTCTGAAAGCTGTAAACTCGCCCGACATCT  
CTAGTTCTTCTTGCAACGACATAGGCGTAGGCACGCTATCTTCCGCCGGAGCGCGGATCGT  
CTTTGAACTTCTAACAAGGCTTGATATTTCTCCACTAGCACTCTATAAGGATTCTTCATGTCG  
TTCGACACTTCGTTTTGATCGTTTCGATTTCCTGAGTGAGAGACTCAGTGTACGTTGACTATCG  
TTCATTAGCGATTCAGCCATGCTAATATCATCGTATTCCTCCTGATTCAACATTACAGAGAG  
TTCGTCGTGCGTCTTAGAGTCCAATCCGCGTAAACATCGCCCGCATAATTGACCCCGCCTTA  
CTTCTTCCAGAGTATTTATTTCTCTTGAAGATTTTTACGCTCTTGTGCTTTATTACGCCAAAC  
GTTCAACTGTTCTTCCAACGCGTTATTTTCTGCAACAATGTTGCCAATTGTTGCCGAAGCTC  
GGTAACTTTTTGCTGCTCCCTCGCCCTCTGACTTCGCGCCTCTTGCAACTGTCTCAACAATTC  
GGTAACTTCTTCGTTCGTCGGAATCGTCGGTAATTGTTCGCACGCTCGAGTCCGCATTTG  
CCTCTTGGAAGATTTCTGACCAGACGGAGCAGCGTTCTGTTGTGTGCTGCTACCCTGCGTG  
ACCGATACTTTCCAATGAATGGTGTGTGTTTGTGTGATATTGTTAGCCGATTGACTCGTAGAT  
TGTTGCCGGAGCAGACTTTCATGTTGCTCGTTTATCTCGTCGATTTTCTTCTGAAGTTCTTCG  
ACCTCGCCTCTAGGCTCTCGATCGTCAAACATTGACTCTTGATCAATTTTTGTGCTGGTGT  
TCTCGATTACTAGACGATGATTTCGCGCGTTCCAAATCTTGAATACTGACTTCCAGTTGCTCG  
TAAATTTTCAATCGCGAGTCGTTCACTTCTTAAGGGCAGCGGTTTGTTTTTTCAATACTCT  
ATCTCTTGCTTGTTCCTCGACGGTCGATTGGTGCGCTTTGATAATATTTTCTAATTCCTTGT  
TCCGTTCCAAAAGCGTTTTTCCAAGTTCTGCCGCTAATTGTAAATCCTGAAGCATATTGTGA  
TCGGCCTCCTCGTCCGCGAGGCAGCGAACGTTGCCGATGGAAGAAGACAGCAGACTCATG

TTTCCTTGTTAGAGACGTCGTCGTCAGTTTCACGAGCGGCTCACGGCTCACGCCGTAACGA  
AATCGATCGGCGCCGGAATCGCGGAAAAGCCGCCTAGTCCGTACGCGTACGCGATTGGTC  
GAAGCTGCGGTTGAAGCTTGCGTTCGAACCAATCGTTACAGAGTAGTCGGTTGCTCGGTAC  
ACCGAGCGAGCCTCTACGAACGCACCTGTCGGCCAAGCATCCGGCCAACTCCTCGAAAAC  
GCTTCACCGCCGATCACTTTCACTCGACGTAGAAAGGACGATCGCGATATCGTTCGAGCAC  
CACCTGCCAACGGTGGAGACTTTCGATTCTCGATTGCGCGTTTTTCGCCGACAGGGAATCCC  
GTTTTCCAGCGGCTGGACCAGGCGGCAGTTACAATTCACGTTAAAATCGCCGCGTTTTCTCGA  
TCGCATCTTGTTAATCTTGTTGCGATCTATAAACCCATACGAGCCCCAACTACACGCACTGC  
CGAAATAAATCGAAAATACACACGTCTGCTGTCACTGGCACCCTTTTTTTTCGGCTACCTCGA  
ACTGGACGAGACGGAACACGAGTAAACTTACTGCCCCGGCACCGTCGCTACGTCGCGAAA  
GACGACGACGCATGACGCGTGCAGGGACACCGAGCACCACAGAGCCACGATCAATAAGC  
GTTGCCACGGCGTCTGCGCCGACAATGCGATGCTTCGACGGACGAGAGGAAAGAGACAGG  
GATTACGCGCATGTGTTAATGTGTCTGTGTGCTCGCGCTATCGACGCGACCAGTATCGACAA  
TTTATAGTGCTCTTCGTTTACACCGACACACGCTTCTACCTCCATTGCTCCGTTTGCATTAAT  
TGCTTCTTCGATTTTAACATTTATTTCTCTCTCAATCGAA

124. >MSTRG.2415.1 Gene=MSTRG.2415

TTTTAATAAACTTTATAGTAATTATTGAACTTATTAGATTAATTATTCGACCTTGAACATTAT  
CAATTCGATTATCAGCAAATTTAATTTCTGGACATTTAATTTTAACATTATTAGGAATTAATA  
AATTTACATATCGAATTAATAAATAAATTCAGCAGTAACTAAAGTTGATGAATGAACTAA  
AGATGAAACAGGAGTTGGAGCTATTATTGCTATTGGTAATCAAGTTGAAAAAGGAATTTGT  
GCTCTTTTAGTAAAAGCTATTAATAAAACATAAATCATTATAAATTCATTTATTTTATAAAA  
ACTTAAATTTTCATCTTCCATAATATGTTATTAATCCTATAATTAATAATAAACCAATATCTCC  
TAATCGATTTAATAAAATAGTAACTATACCTGAAGTAAATGATTTTATTTTATATAATAAAA  
TTACAAGACAATAAGAAATTAATCCTAAACCATCTCAACCTAAAATAATTGATAATATATT  
CGGTCTTAAAATTAACATATATATAGAAATTAATAAATAAATTATTAAATATAAAAAACGA  
T

125. >MSTRG.2429.1 Gene=MSTRG.2429

CGCTTCGATGACAAGGCCCGCCAGTTACTGTTGCGTGCACGAATGCGACGAAATACCCGAACG  
TCTTGGCGGGTTTTCGCTCGGAGCTGTGTTACGAGACCAGCTCAGCAACGAGGAAACGAA  
GGTGACGTTTCTACGAGAAGGAAACAGTGAACGTTCAACAGTATACGAGAAAAATAAGGA  
TCAGCATCGAAGTGATACTTGACATAGGAGACACCAACGCACGGAGAACCTGTGAGCA  
CCTGAAGTTGCATTTTAGTCCAACCTTTGGCCGCGCTGATAGGCGGACGATTGCGAGAAGTTC  
GACGTACCACATTCTGTATTAAGGTTTCCAGAAAGTCTTACAATGGAGCCTGGCAAAGAGT  
GTATTCAGTATCGTTCTCTTTATGAATCGAACAAAAGGCGAACATGGCAGTCGCAATAGTC  
TGTAATATACTCAAAGCAATGGAAATACTGTAATTAATACAGACCAAGTATATTTAGCCAA  
ATTGCAGAAATGAAATCTATCGGATAATTATCTTCGATTCTTCGAAAAATTTAATCAGCAA  
AATTGAAAG

126. >MSTRG.2459.2 Gene=MSTRG.2459

CGTTATAGTACGCAAATAGAGGCAAGTGGAATGGTGTGAAAGAATTTAGATCGTGTGAACT  
TTGTATGAATAATAGTGTATGAACAATATTTTATGAATCATTATAGTGAGATAAAAGTCAA

TTTATTATTATGCATACACAATTGCATTTCGATTTAATTTCGTCCTATATTTTTTTATAATAAACT  
 TTAACCCCTATAATTGAAGTTTTGGTTTCTTTTAAAATAGAAGTGTACTAAACGAGAAGGAC  
 ATCTGTTTGTGTGCGTGTCTTCACTTATTCTCCCTACTTGTGCGGATTCATTCTAAAGTGCAGTT  
 GATCTTTGTTTCGTTGCACGTATTAAATCTTATCGGAAACAAAATCGAAACGTGTACGTCGAG  
 CGAAACGACGCTCGGCTAGGAAAGTGCAAAGGGATGCTATCAAAATGGGTTTGCATAATTT  
 TTAATCTAATAGTTTCTGTGATCGCGGCGATGAAAGATGAAAATATTAGAGCTTTCATAAA  
 AATAACTGAATTAGAATACGAGGATATTTGTTTAAAGTACATCTGAGGCGGAATGGGCATTC  
 ATTAATGCACCTTCAAATGAAACATTATCATTATGGGAAGAAAATTTAATTTCTTATGCTAT  
 TTTCAAGAATTTTCAAAAAGATCAAATAGCTAATATTTCAAAAACCTGATATTAAGGATAAA  
 TCTTTACAATATAAATATGATATTACTGAAAAAATAGGTGATGCTTTATTAGATAGTGAAGA  
 TTTTAAAATACTTGTTCACTTTTC

127. >MSTRG.2473.5 Gene=MSTRG.2473

CTAATATATCTTTGTTGCATAAACTTGTATAAAAAAATTCACGACTAGAAGTTAAACCGTT  
 ATTTCAAATTTGTGCGCAAGATGACGTAATATATCTTGATTGGACCAACGTTATAATGTGAA  
 CGGTTTCTATTTCAGCACAGTTTACATTTGTTTGAGAAAGTGAGTGGATATAGTTATATCAGTT  
 AGTTTTAAATAGATATATAAGGTAATAGGTATATAATGTAATTGTATATTTCTTCAATTGGA  
 CATCTTTTACTTGACTACAATCATTTATTGAAATTAACGATATCTATTATAGTGTGGAACACT  
 TTATCTTGCTTAAGAAACCTATAAAAGAACTCAAGAGTGTTATCTGAGTAAGTAAAGCAAA  
 AACCTATAAAGTAGTAAATGTATTTTTATGGAAGGCTAAAGTATGGATCAATTTTGTGGTAC  
 TGAATTTTGGAACTATAATTTAATATGGAATACAGATGACCCAGAGATTACAGAATGTTTTCT  
 AGAAAACCTGTGTTAGTATGGGTACCATGTGCATTTTTATGGTTATTCTCTGGAATAGAAATT  
 TATTATTTTTTAAACAGCAAAAATAAAAATATTCCATATACATGGTTATTTATTTCTAAACA  
 AATACTCATAATAACTCTGATTTTACTTAATATTGTTGATTAGGAATAGCTATACATAAAA  
 GTACTTATGAAAAAGTTTATAATGTTGATTATTGTACACCA

128. >MSTRG.2510.1 Gene=MSTRG.2510

AAGACGCTTATTCCTCTCCGTGTCTATGCGCGTATCATAAAGCATGATTTCGCGAAAGAACA  
 CTTGGAACGAAACGCTCGGTTTCTCCTCATCTTCGTTTCTTCATCGCCAACGGAACATCTTCA  
 AATATATCCATATGATATAAACGATACACACACGCATACACACGGAGATCTCCGCTTTTCT  
 CCTCCCTTACAAACAAGCTCGCTCGCTCGCTCCAGCGCGGTTGTACGCGGCTCCTAAGTCGT  
 GATCCAACGCGACCACGGATCGTGGAGCGGTGAAAGAAGATCGTACGAGTCGTCGTCGCGC  
 AGGGAGGAAGAGGACAAAAGAGACGAGGGCGCGTCGGGGTGCGTGCAGCCCCTCCCGGC  
 GGGTGAACGAGGCTTCGCCCCCTCGTTTTTGACGCGAGTTGAACGAGGCCAGGCGACCGAT  
 TGTCGAGCATCCCCATCGTCGTCCTGGCCACCTGTCGCAGCATCGGTTCGAGCCGGGCCGC  
 GTGCAGCATAACGCGACGACGACGACGATGACGACGACACTCGTTGTTCCCATGACGTGTTT  
 CTCCGCATCTTCCGTCTTCTCGTGGCGATCGATTCCCTCGTGGCGAACGAGGCTCCTCCTCG  
 GGATGGCACTCCCTTCTCGACTCGACGAACGGCACGCTGGCGACAATAACCGGGGGTGAG  
 AGACGAGCGATGGTTTGGATCTTTCGGCGGTGGCGGCGACAGCACTGGGACCTTAACACCC  
 ATCCTTGCCACCTTGATTGGACGAGTGTGAGGCTCACGATTGCGGTTGCGGTGTGCATGGCT  
 CTCGCTTCTCTGCCAAAGCCGGCGGCTTTATCACAGGCTTCTCTTCGGTCACTGGCGTGGGT  
 GGGGCGTCCTTTCTTGCGGCATCCTTTCGTTTATAGCGTCCAGACCCTTCGCCTCGGCGAA  
 CGAAGTGATTTTGTGGTTCGGCGAGAAACCTTGAGAGCGTTTTTTAGCGACGTTTTGCCAC

CCGATAACGCACCAAGAGGCAAAGCTCCAGTGGGCGTGAGGCCCTTCAATTGTAACACAC  
 TCTCGCTTTCCTCTCTCAGGACGGAGAAGACGCGCGCCATTTTGCCAATGGCTCTGATCTTG  
 TTTCTGATAACCTCCTTGCGTAGATTGGCTGCTGCACCTTCTTCGAGCCCGTCGTCTCCGTCG  
 CTCATCAGCTCGTCGTCCGAGCATATGTTGAGCACGTTACCAGCATCTCTGTCACTTTTTCA  
 CCTACAAACGGCAGGGACCACGTGAACACGTCCATGAAGTTGGGCAACCAATAAGGATGA  
 GGTGAACAGTTGAATTGCCTGATGTTTCATCACGTTGTTCTCGTACTTCAGCACTGCCGCCTTG  
 TTGTTATAAACGTCGAGGTAGTTGGGCGCACTGAAGATGGTGATTAGCGATGGGAAGCCCG  
 TCGTCTGAGATTTCCGGTACATGCGATAACCCGCGTCTGTGCCTCGTGCGCCCTAATGATG  
 CTCAGCAAGTTGTTGTTCTGCAGGAAATCGCAGCACGCCGCGTAACTGTAAAAGTACGAAC  
 AACCCCTGACGCTGTTGTGGGAGAAATGTTCCGGCGTTCTTCTCGTTCCCAAAGTCCTCCAAC  
 GGATCCGACCAGAGTAGATCGCACATTGGCCCGTACGCCGGGGGCTCTTTGAACCTGTCCA  
 ATTTGCGTATGTCTTCTAGATTGTGAATTTCCGGCGAGAGTCCACCGTGCACGCAGAGGAAC  
 TGTTGGTTCATGAGAGCCGCCAGCGGCAGACAGTCGAACGCGTCCATGCAAGCGTCGTACA  
 CCCTCTCCGAGTATTTTATTTTACATTCTTGCTTAAATGTGAAGTATTCCGTGAGATGACGGC  
 ACTCGTGATTGCCTCTGAGGAGGAACAGTGTGGTTGGATGGCACAGCTTAAGTGCCACAG  
 GTACAATACGCACTCGATACTGAAATAACCCCTGTCTACATAATCGCCGAGGAAGAGATAC  
 TTTGTCTGGAGGGTGATCCGCCCACTTCGAATAACTTCATCAGGTCGTAGAAGTGTCCGTG  
 AATGTGCGCCGACACGGTGACTGGAGCTTCGATATCGATCATAGTCTTCTCGGAGCGGAGG  
 AGGGCGGCTCCATCGGTGACTATGCGAAGAGCCGCCGCTCGTCGATCCTACCTTCGAGGA  
 TAAAGTGTTGCTTGAGGACTTCCGGCCGCGGCCGGTCCGTCCGCGGGTGAACACCTCGGC  
 CACTGTAAGTTTGTCGACGGCGGAAAGAGCACATTTTGTATCACTCGTTCCGTCTGGAG  
 AGCTTCTGCGAATTGTTGAGGTCATGCTGTATCAGGATAGTTGACGGGTGGGCGCCGGCCT  
 CTCGCTCTCTTCTCTCCTTGCTCTTCTCTATTTCACTCTTCTCTCTCCCGGTACACAGGATC  
 GTCTCTCTCCCACTCTTTCACCGTGTCACTCTGTCACTGTTTTTTCTTGTTTCTCTAGCCGTAG  
 TTAATCGCGCGAGGTAGGTTCTCTCCAACGGGGGGTGGGTGGAAGGAGAGGGCGGTATT  
 TTCACCTCGAGAGCCCGCGCGGCACACACACATACACGCACGGAGTAGGGGAGGGAGG  
 AGACGGGGGTCGGAGAGGTGACGGAAGTTATCGCACGGTGCGGCACATCGGTGGCTCTGA  
 AGCGTTGTTCAATTGGGCGTTTGACAGAGTGAGAAATTATTCTGCTGTGTTCTCTCACTTCCCG  
 TATATTTACACCGAACGACCTACAGTATGCCTCTTCTCGTTTTTCTCACTCCCTCTCTCGCTTG  
 CTCTCTCGCTCTCTCTCTGCCCCGACAAAAGATACCACCAACGCCTTTTGCGGGGCGAGTA  
 ACTGGATCGCTGGACCACGCGAGCTGCACGGCCCGCACCGAGGGGGTCTCGCAACCGCGG  
 TACCACCACACGAGCAGCACGACAAAACCTCCGGTAAACGACAATAAGACGATGATTATT  
 AACGACCGCAACGACGTCGACGAAGTAGAGGACAACGACAACGACACAATTGCGGCGTG  
 AACACAGGGGAGAACGATCACGGCGACGACGGCGGCGACGACGACGACGAGTGAAGACGAC  
 GATGATGACCACGACGACGGCGATGGCGACGACACCGTAATGACGAGCACCGCGACACG  
 AAACCGTGACACCGACACCCACGGTCGAAAACACCACGCCGCTAAATTCTACTACAAGAT  
 GTCTGTCTGTCTGGCTCTCCG

129. >MSTRG.2529.1 Gene=MSTRG.2529

GGAAGGGTTTACGCCAATCGAAAGGAAAATGCCGATTAGCGGTTGTCCAAGAGGCCACAG  
 ATTTTTACCACAGTCCGGATGAATATCCACCAGGTGGCACGCGTGTGCGTGCCGGAACTTTT  
 GCTGCTGGCGATGTATCGTTCGATTTCTCGCTGGAATTCGAGCTAGTCGTTCCATTTTGACA  
 GCTGGTCCGTTGTTTTGTGATTCTCCATAACCAATTCCGGTTACCGGGTTGCCATCGGGCTTG

TTGCGCGGCGTTTCGTTGCTGTTGCTGTTGTTTCGGTGCTGTATCGCCGAACAAAGCGGAGCC  
 CAGCTGCGATTGGTTGTGGTTCTTCACGCGGCGGGGGCTAGTCTCTTCGGGCGCCGCGCCGA  
 AAATGTCGCTGCTTCGCCACCAGGGGGTTTCAACACCCTTTTCTTCCCGTATCCAACATTG  
 TCGAGCTCGACGTGTCTGTAGGTCGCGTAAGTGGCCATCGTTCCTCCTTCCTTTGAAAAAC  
 TCCCCGCGTCCACCCTCAGCTGCGTCTTCCTTACGTCTGAAGGTGGGTGTAACCTCCCGTCTG  
 CGGTGTCACACAGAGCCAGAAGAAGAGAACACGGTTGTCGTCCTCGCCCTCTCGGTGAGTT  
 TCGCGAGAGTTTCTCTCGATGTTGCGCAAAAGAGGGACGGAGGGAGGAAAGGAAAGGAA  
 AAGAAAAGAAAAGGAAAAAAAAAAAAAGGGAACGAAAGATCAATATATCCAGAGACGACG  
 AGCCGACACGGTGAGCTTCCAACCAATTGAGAAGCTGCACTCGCAGAATCTGTGCGTCCTT  
 GACTCGAGAGACGGAAAAAAGAGACCTCTGCGAGCTCTCCTCTTCCTTTTGCCGTTGTTGT  
 TATTGTTTTTGTGTTTTGTGTTATTATTATCTCTCTCTCTCTTAAAATTGATCTTGAAACCGA  
 TTCCAAGCCGATAAGGTCACGAATAATAATAATAATAATAATAACAATAATAATAA  
 CAATAATAATGATAATATCGTTTATCGAGGCAGAGGTAAACACTCGTGCAGCCG

130. >MSTRG.2554.1 Gene=MSTRG.2554

GATGGCGGTTAATACTAAGAAAGTAACATCTATATATCTTCAATGTAGATAGAAACATATG  
 AATAACTAATAGACGATACAATCCAAGTGATACTTTATTGATATCAAATTCATTATAAATTA  
 TTACGGATTTTATAATTATTATTATATTATATATGATATAAATTAATAAGTTTAAAAAATGGC  
 ACAAGAAGTAGAAGAACTATGAAACGCATTCAATCACATAAAGGAGTAGTTGGAACAAT  
 TGTAGTTAATGGAGAAGGTATCCCAATCAAATCTACATTGGATAATACTACCACAGTTCAA  
 TATGCAGGATTAATAAGTCAACTGTCAGATAAAGCACGCTCTGTAGTACGAGATTTGGATC  
 CAACAAATGATCTTACTTTCTTACGTATTCGTAGTAAGAAACATGAAATTATGGTTGCTCCA  
 GATAAAGAATTTATACTCATAAGTAATACAGAATCCAGTTGATTGATAACCAAAAAATTAATA  
 TATAAAATATTATATGCTTTGGATGGATGAAAAACACCATAATAAATAATCATAGCTGTTA  
 TACCTAATAAAAAATGGTACAATACAAAAAATAATGAGTATATTAAAATACCAAGAATTTTT  
 AACTTCATTTGATGAAACATATATCCAAATAACAGTTGCTATTATATTTTCAAGAAAACAA  
 ATTATATAAAAGAACACATGTTTAAAGTAATGTACTACCATCTATTGTATTTAGATATATGAA  
 CACATGTATTACACCAACTACCATGGAAATAATATAGAATAAATACGTTCTTTAATTTTTG  
 GGAACAATGTGGAGCATGATTAGAATCTTTACAAAATTCTAATATACCATGAGAATCAAC  
 AATAATCCAAATAGTCATACTTATCCAATGAAAAATACAACCAATTATAGTATATATTGGC  
 CAAATACTTGCTAGAA

131. >MSTRG.2556.3 Gene=MSTRG.2556

TGCTTGAACATAATATTCCTTATAAAATATAGATGTAAAATATACTTATCGGAAAAGTGTTAG  
 ACTTAACTTGTTTCAACTTATCCTATTATATTTAAATTATAAAAAATCTTTTTTAAAAAAAGT  
 ATCATTAATAAATGTCTGCGTGGAGACAAGCGGGATTAAATTACATCAATTATTCTCAAATA  
 GCTGCTAAACTTGTTAGACAAGCATTAAAATCAGAGTTTCGAGCAGAAGCTTTGAAACGTG  
 ATGAAACAAATATAAAATTTACTCAATGGAAAGATGGTAAACCTACTAAACTCATAAATT  
 ATAATATCACAGATTGATGGAGAAATCATCTACACTTCTAATATATATGCATATTCTTGCA  
 TATTGTATATGAAACAAATAAGAGATTTAATAAAATAGTAATTTATGTATAGTAATTCAAC  
 ATTCTTGTAAGAAGTAAAAATATCCTATAATATTATCTGTTTTTCTTTAATTTAATCCATTTTT  
 CTCTTAGAAGATCATCTTATAGTAGGACAATGGGCTTTACAATGTACTAAAAAAATATATA  
 TGTTATAATTGAATATAATTTCTATATAATTTTATAAACTCACCTATAAATTCTGAAACAAG



ATCATTATCACTATCACCACGCATTGTACCTGTTATTTCTTCATCTTCAACCATAGGAAGAA  
ATAAATGAATAAATTTCGACCGTATATGGTGGAGCTATTGCTTCTAAAACCTAAAATATAAT  
CATTATATTATTAAACATAACATACATTCCTTTTAAAAATAATAAATAATTTTATAATACCT  
CTGTAACAAAATATCTAATTAAGATACATCTGTATCTCCACGTTGCCAACATTGTTTAATG  
TAACACACGACGGGTA

132. >MSTRG.2580.1 Gene=MSTRG.2580

AATGCAGCCGAGTGAGGAATTCCGGCCCCCTCCCGCATATTTATCTGAACGCTGCTCACCGG  
TCTGCAGGGCCCCGCTCCGAGCGAAGGGCCTCTTTTATAGTACGGCAACTACTCTTCGTCGC  
TCATACCAACGGAGAAACGAAAAAGGGATAGATAGCAGCAACCGCACGAAGTATCGGGC  
CACTATGCGTACAGATCTATTTCAGGAATGCCCACGGTGTTTTGTAATTGGGCGCATGCGTGG  
CATTTTCTCCTGAATATGCAACCGCGATAAGGTAGCCAGTAGAGAGGAAAAAGAATCAGC  
AATAAGCAGACTGATGACGGAGAAAAGCATTCTTCGACCGGACAGCTGTTGCCGAACAA  
AGGCCGAAGGATACAAAAGAGGAATTTCTTGGGCCGCACGTGGCTCCCGAGAGAAAAGAG  
AGAAGGGAAGGGAGAAGAAAAAGAAGGATTCACGGCTAATGCAAGGGGCCGACTATATA  
CACGTGACCCGCTGCACCCTTTTAGGCATTCTCTCTTCCGTCAATTTCTCTTTTCTTAATT  
TCAATCATCTTTCATTTCTCTTCTGTG

133. >MSTRG.2606.1 Gene=MSTRG.2606

AGGATGTTTCGTACCCGCACGATGGTTGCATTACCGGTAATCCTGAAAAGCTGAGGAACTTT  
TTTACCGGATCTTTCGAAGGAAATCCTACGTGAAAGAGGAAAATGTCCGAGATATACGAGG  
TGAGTCTTTGTGACCGAAGTTCAAAGCTGTTTCGTGCGCCACGATTGCCGGATTGTAAATCGA  
TAAAAAAATTGCGATGAACGATCGTTATAATCGATTGAAGTTAAAAGAAAAAGAAAAAAA  
AAGAAAGAAAGAAAAAAGAAAAAAGACGAAGCAGAGGGTCTTGTTACATATAATTGCG  
AGGATGTAAAGG

134. >MSTRG.2634.3 Gene=MSTRG.2634

AAAGCCAGTAAGTGAGCGTTGTTACGTGAGCATGAAAAATAAATTATACTTCAAAGTAA  
CAAATGTCGATTTGTGATTTATTGTATAATTATAGTGACTGTTTTCGCGTGAAAAAATATAT  
AAAATCGAAAGCAAATAGTAAAAGAAAGAAAAGATAAAAAAATTAACCTTAATTAACAA  
GATTGTCAATTGTGTTTCGTGTCGACAGTACTTTCATATGATTCACCGATGAACTCGCAAGTA  
TTCGTTCTGTGGACTGAATCTAAAATCGCTATGCTGCGGTGCGGTGTATCGGCGCGCCGAGA  
CGAGACGGACGGGACGAGACGAGCGACGGCGGCGACGAGGAGGTGGAGGAAGAGGCGG  
TGGAATTCGGTGTGTGCGCTCATGACGGAGACCTCGTGCGTACCAGTCGCGTCGTGAGCG  
GAGCCGAGTCGAGTCGTGTTACGGCCGTAATCGTGGTTATTCCTCGCAACAGTTTGCTCCGT  
GACGACGTCAGTATCTGTGCGGAAGACGAGAAACGATTACCAGTAGAAGAATTTAAAAT  
AGTTAAAAATCAAGTGTAACGTCGCGGTGAACTGAATGCAATTCTTTTCCCTACTACATCC  
TAACATTTTTTATCCGAGTACGTATCGAAGTTTTAAACGTGCAACCGAAGCGCTACTCTCGT  
TCGACCTCTCTCGCCCTCCGCGAGTTATATATCCGATCTACGTGCGCTAGTCTCCTACTCT  
CTTTTTCTCGGTGTATATTTTGCTCTCTTCTAAGTGTCTGTCTTACTCACGCGTTATCCCTCC  
TCATTAGTATCTCACTCGTTCTCGCTGGCTCTTCGAGCAGCGATTTCAGAATGTGACAGTG  
CGCGTCTCGCGGTGCGCTCGCGGAATAAGCCCGCAGGCCGCGACGGCGATGGGTGAC  
GAGCGACAAGTGTTACGGTGAATAGTGAGAACAGTGAAGAAGTAGGGAGAAAAAGACAG

ACGATGCAAGCGGAAAATGTCACCTCGGTGATACGCGTATACGGATGACGGGGAGTGATCG  
 ACGCGACAATCTCGAATTTGAGGTTAAAGTGTCGTGGTCGTCTCGTCGTGTTCTTGTGTT  
 GTTGTATGTGGTGCCGGTGCGCCGGCATTGGCGACGGCACGGGCAAAGGAGTATCAAGA  
 ACGAAAACGGCACTATCGTATTCTACAGGGCTTGGCAGCCCGAGATTCAAGGGACATTGAT  
 CAAGCGCCGTGGTACATTGTTTGAGTACAGACTCATCTCCTAAACGAAGGAAGCGAAAAA  
 AAGAAAGATTTCGAACGATACAAAACAATTTTTTCGTAAGGCGATTGTGCCAATGTACGTAT  
 TATATACGCGCGCGCGTGTGTGTTTGTGCTTATGTGCCGGGTCGTGAGGTTAAGGCACCACA  
 TCGCCTGTCGATATACAACGTTGAGGAAAGTCAAGAACCGGTGTCGTGTGTGCGCGCGCGA  
 CCGATTCTGTGCTGCTACATCTAACGGATAAGAAGTGTATCGTGATACTAATAGTGCGCGTC  
 CGTAACCCCGCTGGCGACCGTTGCACCGTGCACATCTACGGACAACCAAAGCTGACGTTTCG  
 CGAACTGTCGAGACAAGTAGACAATCCTCGTGCTTTTCACTTGTATATTATGCGCTACGTT  
 TTTTCGTTCTCGAAAAAATCCTCGAGTACTTTTTGTCTCCGACGACAACAACCTCCCTTTGGAC  
 ACCAACTTATCCAACGCGACACATTTTCTTCAATGTTGTCAATTTTGTATTTCAGACGTGAAG  
 AACGTAAGATAACGTTTCAACGTTTGGTCGACAAAGCAAAAACAGTCGTCTCAAGGAAAT  
 AAAGTGGCGCTTTAGCTGATATCGTGGCACACAGGTAAATGAAGGTTCAAGATTAATAGAC  
 AGTATTTGTCTCAACCTCGTTTACAACGTATGAAAAAATTATCGTCACAAAGGTAATATCG  
 TTTATTATACGTTGATCCGTCCCATCGCTTGTACGCGTCATCTTTAGTTGGAAATATTTTCGT  
 TTTCCGGAACGAAAAAGAAGAACGAATGACATTCACAAAAACTGGAGTGTGCGCGGTATC  
 GGATCTGAGCATTTGAACCAGTTTTAGCGCGAAACGAACGCCATCGTTCCGCTACAAGGGG  
 ACTGTCATACTATTTCTGGGACCGTGATCCAAAGTGCACGAGATACGTAGAGAGCATAAATA  
 AATATACGCGCGTGTCTGGCCCCGTGAGAAGTCTCGAGCTGGGGACCGTCATTCTGTG  
 ATTCCCTTCGGTCGTATGTGTGTTGGCATAAGGCGGCGGTGTTTGTTTTTTTTCTTGACAGTG  
 TATAACCGCCCGGTGTATATACTTCTCGTGTTCGTTTTTTTCGTCTCGTCGTACGTTGGCG  
 AAAGAGGAGCGGCAACGGGGAAACTCAGCACTGCGAAAGGGAGAGAAACGAGGCGCGG  
 GTAGAGGAAACTCGCGGTGGAAGAAGAGCGAGAGGGGACGGTGGAGGTGGTGGAGGGGG  
 TGGTGGAAAGTGGCGTGTCCAGTGCAGCGGTGGTGTGACGGTGTGCGCTCAGGCACCGATT  
 CAAATATTTACATTTTCCGCGCGGCTACGTTGAAAAGTACTGGCCCCCAAATGCACGTAC  
 CGCAAATCCTGTTTCATGTTTCATGTTCTGGAGCAAACGGACGGCGCTACTAGACGTCTCCT  
 AAAGGCCAAGGTCCGTGGAGAGCATGAAACCGAGTGTGAAGCTCAAGAGGATTCGTACG  
 TATTCATCGCGCAAACAACACGAGTGGCACCGACAACGACACGAGCAACGTGACGGC  
 AACGACGGGCCAAACAACCAGAGGAGCGCGTGGAGCGTCGTACAGGAG

135. >MSTRG.2688.1 Gene=MSTRG.2688

AAAAAAAAAAAAAAGAAAAAAAAAAAAAAAAATTACAAGAGTGGAAGAGAGCAGATAAGA  
 AATAACGAAGAGGCTAGACATTATCTTTCTTAAATAACCAGTGTCAAAGTACCGCTATGA  
 TAATAAACCGATGTACAAAGATGCAATTTTTTGGGTTATTTTGAATCGCCTTCTCATCGATCT  
 TTTCAATTTTCGTTTTAGACATAGCCTTGTATCTGTCTAATATATCTTATATTTTATATTTACGTT  
 ATTTTATAAATTAACCGGTGTACTTTTAGATTGTGCGATTTTTTTTGTTTTTTGTATTTCT  
 TTCTTTCTTTCTTTAGAGTCGAGAGAAATAAATGAGAAATAAATTGACGTCTCTTTTAAGAA  
 AGATAATTTTCTTGGAGAATAAATAATGAATGTGACGCGCAGGTAAGTTAACATTTTCTCGTT  
 CGTTTGTCTTTTTCTTCTTTTTCTTTTCTTTTCTTTTCTTTTTTTTTTCTTTTCTTATATTC  
 GTTAATGCGTTTGTTCACCGAATAAATCACGGAACACGGATTCAATTTTATTCTGATGTC  
 AGAAATTTTACTACAATGCCTGACACGAGGAAATATTTTTGTTTCGTTTACGGAGCACGTA

AATTTACATCATGCTTCACATCTGACTGTTATAATATTTTACGATTTTATCTTTTGTAGAAGG  
ATAATTGCATGCCAGCCACAGCTATCGATTTTTTCGTTTCGGAACGGATTTTAATGTTTAATGC  
GCTACTGTCAAACCTCTGTCTCTCCAACATATATATTTTTTCATTAATTGCGAATCTTTTATTAAC  
GAGTGTTTTGCGAATTTTGTTAAACACGATTATACTTGATAACATTATACAATGCATGATTA  
CAAATATTTATTACATTCCAAATGTATATTTATTCGTCAACAAAAATATGTATTATATATAT  
ATATACAGTAATATATTTTTAATATATACGGTATTAGTATTTAAACAACATTTACATTGATTA  
CAAAACGATTCATATTACGTGTGATTACGTTTGCTTATAATAACGCGCTTATAATGATTTCT  
ACGAAAATACAAATCTTGAAAATCTTCAAATCTTTCTGTCAACAAATAAAACGTGTCCAAA  
AACGTTTTAATTATTGCAATATATCAGTCCCTGAGACATCGATGGAAAAAAGGAAATACG  
ATTAATTTCTCCACCCTTCACCCCCCGCCCCCAGGAAACGGAATAATTAGATGCACCGTAA  
AAAATGAGAGTCGCGTAATTTATTCCATTCCATCATGAAAATGAATTCCAATACAGAGTCC  
AGGCCAAAATTATCACGCTTGTTAGCGCGTCAATCGATTGACTGATCAATTCTGTAATACG  
CAGCAAAAAAAAAAATTGATCGGGCAAAAAATGCTATATCCTGGCGGTAAACAGTATTTCC  
GGCGGGGGTGGTGGCGGTGGTGGTGGTGGATAATGCGTTATTGGTTCGAAGGCGCGAAATA  
AGGAAGACGAGGTGGGAAGAAAGAAGAGAAGAGGAGAGAGGAAAGAGGAGAGAGAA  
GTCAGGAACTGTCGGAAAAAAGATCGACAGCTGTCGGAAAAATCTGTGCCTTTTCGAGAT  
AAGGCGGTATCCGCTTCGATTGAGATACAAGGATTTACGCTTTCAGCCATTTATCGAGCA  
AACAGATTTCTGCATCTGCCGCGTTCGCGGTGTTTCGTCTCGTCTTCTTCTTCTTCTTCTT  
CCTCTTCTTCTTTTTTTTCCCCCTCTTCTCTCCTCGGAAAGCTTTGGAATGAAGCTTTTCGGAA  
ATTCGTGCGTTTAAAATAAAAATGTCGATGGTTTTACAGAAGAGACCGTCCTACGGTCGGTTT  
CTATATCTCGTGTGTGAACGTTTTTCGATTTTTATTCTTTATAAATGTTTCAAACGCGCATTGG  
ATTGTAATATTAATATTATAAAAATTTATACCGTAGTTTTTATATCTCGGTGTAATATTTTGGAT  
ACGACGACGATTGTAATTGAGGTTGATTGTAAAATAACGAATTAACGAGAGAGAAAAAAA  
AAAGAATTTAATACTACATATACAATTCAGAGAAGCGTAAATTAATGTTGGAGCATTTCGAA  
GATTATATAAATATTAAAAAAACAATCTCTGCGTATCGACAGATATTTCCGGTGAATGACA  
TCGTTAAACTCTCTTATCGGGCTGAAATTCCGTATTATTTTTTCGTGATTACGTTGCACCATT  
TGCAACAACAATTTCCACACTTTTTGCTTTAACAACGTCCCCCTCGCTGCAGAAAATCCAT  
TTTACAAAACCGTATTATCATACAATTAATAAATTAACCGTTTTTCGACGTTATACCCCGAAA  
GCGAAATTTAATTTACAAATTTTATTTTACCTTTGCATTAAAGCAATTTCCGCCGATTCAAT  
TATTGACCTCTCGCGAGTTCATTCTCGCCCTCCCCCCCCCTCTCCTCGCATGATGCGCCACG  
TTTATTAAGTTAAACGACATGTAAAACCTCTAATATCGCGCAGACTACTATTATAACAACAA  
AGATGACGCTGCGAACTGTAATCGAAATATATCGAAAAATTATTTTCATCCACAACAAGA  
ATCCTTCCAATTATCATTTGCAACGTGACCCTTTCCCCTTCACCCCGAGATAGTACAACTTTT  
CACGCGTAACTTTCGTTGACCATCGACGAATAACCAACATCGGCTCCATCCACAACAAA  
CATTTCCATAAGCAATTCTCTTCTCTGTTTTTACAACACACAGTAAGCGTGTAAGAAAGTTCC  
CGTCCGTCTTTCTTCTCACCTAATTCACCTCCCTCGATAAAAATCTTCCACGATAAAAGGATA  
AAACGACGCTTCTTTTTTCAAAGAAAGAAAGAAACAACACATACATTTTTTAACTTTCAACCA  
CGCGGAAGATTTCCCTCCCCAAGATTCTCCCCCATAAATTTTCGATTTACAAGAAATTAGGAC  
GAGAGAGAGAGAGAGGAAAGCGAAGGCGAAGGAAAGTTTAATTCTCCCCCTCCCTCTGC  
CTCTTCCCCCTCCTCCGTCTTAATCTCAGTAATTTTCATCCACCGCGGAACCTCGCTTGTTCCGC  
AACGAATGTTAATCGGGTTGTTTCGCGGTTCCACCAGACAAGAGCGATAAGCAGGAAAACA  
CGCTTGCCATCCTCCTTCCCTCCCCCTCCACCTTGCCTCCCACCCAGCAGGAATCGTGATA  
ACGTCACCGGCGAGCAAGGAAAAGGAAAGTCGTAGGAACAACAATAGAGGGGAGGGTG

GGTGGAGTGGAAGGGTGGGTGGTTGCAAAATCACGAGACTTTGAGGCAACGTGAAATGTT  
GCTACATGAATAATTTCGCGGCGAGCGTGTCTGGCCCCGGGGGCTGAATTTTGCCTGGAAC  
ACGGTAACGAGACCGCAACCGGGGGAAAAACGATATTTAGGAGGGGGGAGGGAGGGGG  
CGAACGACGAGAGACCGTTCCTTAAAGCCCTTGTTTAAATTTCTATGGATATAACCTTCG  
TCATGGCAATGCAACTAGGAAATTTAATCACTGTATATATATATATATATATATATGTATAT  
ATATATCCCGCGGCCACGGAACCGGCGAATTCGGTAACATCTTGCAGAAGTTCGTTATATC  
CCTACCGTCGCTCACCCCTTCCCTCCCCTTTCTTTGACTCGATTCCAGAGGAGGTTTAAACCA  
GAGGAGGAGGGTTATACCCCTTGTTTCGTGATATTGACTTCCATCCATCCATCCATTCCGA  
ATGAAAAACGGAATGCAGGGTTTCTTGGGAGAGAAATCGAATCGATCTCTTTTCGAGTTTC  
GTTCCGAAGGTGGAGAGGGATCGATTAGTTGTTGTCCGAATACCGTCCGGGGGGGGGAG  
GGTAATCGAGTTACCGGAATTCCTGTAGGTGCGATGGTTAAATAGCAATTTAAGTTGAGGA  
GGGACGTTGAAGAGGCGTGGCAGACTGTTTGGTTCGGCAAGTAGCGTGAAATTTTCGTTTCAC  
CCTTCCGACGTACGAGTCGGATGAAATTATGAGCTCTGTTACATCTATTCCGATTATTATCC  
ATCGTGGATAACACTTTTCGATATTTGCACAATCGTGAAATTCGAATTCGGTGTATTTTTTCAGG  
CGATACGTGACAAAGGATTAATGATTTTAACTTTCTTTATATGTCGTGCAATCAACAGGAA  
ATCTGTCCGACGAACGTATCGAAAAAGATTAAACGCACTCTTTAGACCGTATATAATTTTCG  
TAGAAAGCCGTATAACGAACTTAAACGGCACCCGTTTCATTTCGCTTCCCCTCGCAACTTCCC  
CTCCTCGCATCCCCTCTTCTTAAATGAGCTACCTATTTCTCGTTGGCGAGTCAAACGTTTCC  
TATATCAGAGAAGTTAAATACGGAACCCGAGCCAACTAATTATCCGCGATACCTCGATTA  
ATCCTTCTCGTAACTGCAAGAAGACGGCTATTTGATTTGCCAGTTATCCGCGCGGAGAAAA  
AAAAAATCGGTAAAACGGATTAACAACGGGATTTTATAAATGGCGGAATTCCAACGGAAT  
TTGGATGATTACCGTTGTAATTTATGATTCGATATCAGGATTAACAGGATTAATTCGAATTT  
GTAAATAATAAAATATAATTTATTCCTGCAAAACGTTTCGTTAGTTTAATTGCGCGATATTGA  
TTCGATTTAAGTCACAGAATCAGAGTGTAATTTAAAGAAAAAAAAGGAAAAATACTCGAA  
GCGTTTCGCTGTTTCATTTGATATTTAATACGGATACCTGTATGCAATTTTATTAGCCAGCT  
TTACGACCAGTATTCGTATAAGAGGCTTTCATGTTATCCCGCAATAAATATCCTTCGAATA  
ACTTGCGCAGCTTTCAATATCTTGCTATCAAAGAAAGTTATGTAAAAACGGAAACAAATGA  
GAGTCGAACGATGAATGGGACGGATGGGGTTGAATATTCCAGGCCAGGGTCCAATATGTTT  
TTTTTTTGCTTCGCTTCCATCGATACACCAATGCCTAACATTGTCTCGTTGAAAAACGAGATG  
CTTCTTCTATTTCATCAACCTCCAATATTACTTTTCATTTATTCCATTAACATTTTTTTATTAAAT  
TTATCATATCTGTGTCTCAACTTAACTTAATAACAATCTTTGGAAAAAGAATTTAAGCAAT  
TATTGATAAAAAAAGAAACACATCAAAGTATATTAAGTAAAGTAAAGTAAAGTAAAGATTC  
ATCGTGTTCATGCTCATTCAATTAAGTAACGTAACATTTATCATACTTAATCTGGATCA  
GCTTTCGAGAATATATAGCCTGTTATCAAAGCATAATTAATACAACGAGTTATCGAAAGTTT  
GAGTTGACGAAAGATTGAAGAATCGAGGAAAAACGGCGTCCATGACATCCTCGACCAGAA  
TCTAGGTGAACTAGAATTATATTATACAGGATCGAGGAAGCGAGAGATCATTTTATCTCGA  
AACTCCACGGAATGTCTCCAGTGAGCAGAGTCGAGAGTTTCCCGACTCGGCCTCGGGATC  
TTCACCTTGTTTTACTCGAGCAGAATGCGATCCGACGACGCGGAAAAATCTCCTCGCGTCC  
GATTAACCTTATAATCGAAACGTCCAACACGCCGACTTATCGAATCGTTTCGCGTCGATTC  
GCGGAAAAATTCGATTTACGAGGAGAATGTGTGTTTCGCGAGAAAAACCGATTTATCTGAA  
TGCTATCGAAACGAGGGATCGAAGAAAAAAAAGAATTTTATTGCGATATTTATGAATTC  
GATTATTTTCTTCATTTAATTTTTAAAAAGGCAATTTTCTAATCGATTAAATTCGATTTTCGT  
AGCGATAATGAAGCATCGATATTTGAACAAAAAATTTTCGCTCCTAGATGTTAAAGCTCGA

ATATTTTTCTTGACATTCTGCACCGTTCCATTGAAATTCTATCGTTTGTCTTTTCCATTTGAAT  
 CCGCTGCGTATAAAAAAGTTAAAATAAAAAATGTCAGCTCTGCTCGATATGGTTTTATCTTTA  
 TTGGAAACACTACTCTCGTGTTCCGGTATCATCGTCTTTTAAAAATACACGCCGTGGAAATAT  
 ACGCCTTGTTGTTCTTTTTCTTTTTTTTTTTTGGCAACAAAATTTTTAAAAATTGAATATGTAA  
 CAGTGTTCACAAGTGTCTTCACCGAATTAATAATAATAAAAAATTACTTTGAAATGATTTTG  
 TATTATTAAGACTGGTGCAGAAACAATTAATAAAAAAAGGAGGAGGAAGAGACAGGAGG  
 AAGTGGAAGAGCAACAGATCGCGAACATGTCACGCAAGGGGAACAAAGTGCTGTTG  
 CAATTAATGTTTATTAAACCTGTATACATATGTGCGGCTCTCTGTAAGGGGAGGGGAAAA  
 AAAATTACCGAAATGTGGACTGTACGTCATAATTCTTCCATTTTCGCATCGCGTCTAAAAAA  
 AAAAAATACATGGCGAAGTTTTTAATCACGAAATCACATAATAAAATCGTTGCAATCGTA  
 ATGAAAAATCATGTACGCGCAGGCAGAGCGAAATAGGGAAAATGGCATATTGTTAAAACG  
 GAGAGAAATGGCGTACATTTATCCGCCATATCCAATCAATTTTTGTATTATTAACAATCGAG  
 AAAATTGGGCGAAATTTAATAAACGCAGAGAGAATTTATAACTTTTTATTTCTATCTTATA  
 AAATTTTTGCATCATTTTTGTAAAACGCGTGGTGAAAAATGCAAAATTTTTTCAAAGTTGG  
 ATTTAATCTTGAAAAATGTAAAAATATTATCTATCGTACAAAATAAATAATTTTTACATG  
 GCAATTGTCTCGCAGTGTTCGTATAACTAATATTAATTCTTGACATAAATAGCTTGATATTT  
 TCTCTTTTTTTTTTTTTTCTTACAAAAATAACTATGAAAGAAGCAATTACACTTTTGAGTATT  
 ATACTTCTCTTCAACACGAACACGGAATATTTCAACCAAAGGTTCAAAGGGGATGACCCT  
 GGATATATACGCAAGGAAG

136. >MSTRG.2748.1 Gene=MSTRG.2748

CGTTGACTCCTCAATTTTTCGAGGGCTCGTCCGGGTCCCCCTCCCCGCCGCTCGTTAGTCTC  
 TACCCCTCTCCACGAGCTTCTTGTCGACGACCGCGGCACAACCACCACTCGGGGAACCCAA  
 CCGTGTGCCCTCTCTCGCACACACCCTCGAGTGGTCTTATTTCTTTCCACCTTACTTTCACC  
 GCGTTCGCTCACTCTCTCACTCAAGAATCCCCGAGGAAATTCGCGACCAAAACATCCGAG  
 ACGAAGTACTCCCTGCAGCCAACATGTCGTCTGCTAGGCCACCAGCGCGGGCGGCTCACCG  
 CGCTTGAGATGGATCAGATTCCTCCGACTCGGGGGCCAACAATCTGTCTTGTGAAGTGTT  
 AATGCATTGACTCTAGCGCTATCTGTAACATCTATTGGAATAAATCGTTATACTGCGATAT  
 ATTCATATGTAACACACATGTACATTTTCATGTTTTCATGTACGTTTAGTTTATAATATGAC  
 AAGTGCGCTGTGATCAATCCATTTATATGTGTGTATATATATTATATATAAATATTCATATGT  
 ATTAAATGGATATAATTA

137. >MSTRG.2784.4 Gene=MSTRG.2784

CAGAGGCTTACGTGAATCTGGGCGCGGCGCTGGCCTCGGTTCGGACGTGGAACGGAGGCGG  
 CTGCGGTTTTGCGGGCCGGCGCATCCTTGATGGTTCCGGGCTCAAGGACAAGAGGGGCTCA  
 CGAGGCGGCGAGGGTGCAGGCTCTCCTTCAATTAGGCGCCCTCTACGCCGATCAGGGCAGA  
 TTACAAAGGGCCCTGTCCGCGTACAGAGAGGCACTTCACGCCCTCCCGGATCACTATCCAC  
 CTCAGAGCGTTTACAATCTTCTGGGGGAAACTCTGTGCGAGGCTGCAACAGTACGCGGAGGC  
 GGAAAGGTGGTTCCAGGCGAGTTTGGCCAGCCAGCCTGACCACGTGCCGGCCACATCACT  
 TACGGGAAACTTTTGGCCCGAAACGGCTCTCGTTCGCCGTAGTCTGACCACGTAGCGACCC  
 ACATCACTTAGCAAACCTTCGACTCGGCACTCGAGCCGCGTGCTGGAGGCCGAGAGATGGT  
 TCC

TGAGAGCCCGTAGATTGGCGCCGGACGACTCGAGCGTGCACCATCATTACGGACTGTTCTT  
GACGTCCCAGGGCCGACTGTCTGGAGGCGGCCGAGGAGCAGCTGCGGGCGGCGGAGCTTTC  
GAGATCCGATTACGAGCTGTCTGATGGCCGCGGCGTCCGCGCTTCGGCAGGCGGGCCGGCTG  
GAGGACGCGGAGGTGTGGTACAGGCACGCGGCGAGGCTGAGGCCGCACGAGGCGCGCAG  
CCACACGAACCTGGGCGCGATCCTCCACCTGAACGGGAAATACAAGCAGGCGGCGGCCGC  
GTACAGCGAGGCGTTGAGGCTGCAACCGGGCGACGCGACCACCATCATGAACCTGCACAA  
ATTGGCGGCGATCCTCGCGTGACCAGCCACCGGAATGGGACACGACGCGACGACGACGAA  
CCCACGAGACGAAGAACACCATCACCACAACCACCACAATCACCCTCCCCACGATCACC  
GACTCGCCGTATCCTCCCACCCACCCACGTCACCCCGATCTTCCTCCCGATATTCTGTTTGTAT  
CCGTCTGACGGGCGCGCCGACGTCCCCGCGGGGCACAGCTAGCCGTCATCCCCCGGGGGGA  
CCTCGACGCGCCCCCGACTCGTATCGCTGCTATGGTATGTAAAGAATAA

138. >MSTRG.2787.1 Gene=MSTRG.2787

GAAAAGAGAGAGGAAAACTCCTCGACAAATTTCTTTTAGATCGACTTCGTATCCGT  
AGGAAGGAAAAAACGCGGCACCCTAGATCACAGAACCAACGAGATTTCAACGAGAAC  
GTCGAGGTTGAGCACATCGCAACATTTTACAACACATATGTTTCATATACATGGTTATATAG  
AAGGGAGAGAAGATTTAAGGCGCAAGCAAAAAACACACCACGTTGCTCGCTGTCTGATTTT  
TTAATCGTCTTATACGATATATTTAGTCCGCTGTACACACACATATATCCAAGCAAGCTAAT  
CTCGATCAATTACTTGAACGTAATTCACGTGAATTTAATGATATGAAATGCGACGATGATAT  
TATACGTGTAAGCAATTCGAGCAACAAATACCGATTTAAAGTATAAGTAGGGCATAAGTCG  
GACGGATGGTCGCGAGATCCGCCGTTTCTCTTTCGTTGAATGGCGACGCGTCGGAAATGAG  
AATGAAAATATGGATAAATGCAACAAAAACAAAAAAAAAAAAAGAGAAAAAGAAAAAAG  
AACGCGGATGAAAATCGAGGAAGAAAAAAAATTTTAAATATTTCGCGTTAACATTTGAT  
TCTTGTTACATGGATGCGATGCCAGGATACGGTTACGGCGCGTGTCTCATAGTTTCGTTTTAT  
CACAATACTATTTAGATATAAAAAAAAAAAAAATATATAAATATATAAATATATATATATA  
CATACATTGACGTTTCATATACATACGTTGTAAGTAGGTATGTCTAGATGTCTGATTTTATTCG  
CGAGGCGATGCACGAGTGGTACACCAGTCGAGCATGATCACGGTCAAAGGGATGTCTCCT  
CGTTGACGACGAGATATTGCCGGGGTACTTTGACCGTGAATTCGTAATCCGTTCTATTCAA  
AAGGGATCCGCATATATATCGCTGGCTACGATTCCTGGCTCGCCGACGCACTTTTCATCGAT  
GTGATTTTTTAAAAAGGCTGCGCAAAGTCTCGTGTCTCGTGTATGTGTTACGATCGCGCTCT  
ACCACATTAATGTAGCCATATCCAACCTCACCTTTTACGATGTATATCACGTTTACTCACGT  
AACGCTCGCGGAGCTTTTCGCTTTCAAGCTTTGGAACTTAACGCGAATAAAAGGGAAATC  
GAAAGATATTTAACTTATTCGATATTATTAGCCGTACGATCGATCTCGCCGCACACGCGTGT  
GACGCGTCGATATTGAGGAAAAGAAGAAGGAGAAGGAAAGAAAAAAGGAACAT  
GAAAAACATGAAAGAAAAAACGTGATGTCCGCGGATTGTCGTATAGCTTTCTTCTATTAA  
TCGATTGGGAAATATTATCTGTTTATTATCTGTTATATTTTGTGTGATCGATCTGGTATCGCTT  
CTATTTGCAAGGTTTAAACGTTACTTTTTTTTTTTTTTTTTTTTATAATGCTGTGAAACGGTCGG  
TGCCGCCGTCCGCGTTATATACGTATATATATATGTTATGCTTTGTTTCATTGAAGATATTGA  
TGTCCATTTTTGTGCAACGACGAGGCGGTTCTTCGAGCTTCTCTTCGGCGGGGCGCGTATC  
GTTATCTCTTTCGTTGCAAGCAGACTCGGGACATTCGTAATTAGTACCCTGTGTTGCGCTC  
ACAATGTCAGTGCTCGCCTTTAAATTGGCTGTAAGTTCATATTCTCGTACAACGATACTCGT  
ATTTCTCCGCGTTTCGTAGGGACTCGAGGATCCGCTCGCAATACACCGTTTCTCAGTACCAC  
TATTTTATGTTTTTGTACCAAAGTCGTAGTAGCTCTAACTTTACGTTAAATAAATAAAACC

AAAAAAAAAACAAAAAAAAAAAAACAAAAAAAAACAATTATTTGTTTATGATTTTTAGATTCCCAA  
 ACATCTATATTATAATCTAATCGTATCAAATTAGGAAAGATTATTTTTTCTTTTTTTTTTTAT  
 TAAATGTAACATTAGAACAATTGTTATATCGTACGTTTATTATTTTAAAAAATCGCTAAAG  
 TATATTTTATCGTAATACGAAAAAAAAAAAAAGAAATACGTTATTGATTTGCAATATCAAAT  
 GTTTTTACACGATTTTTAGCCTGTAAAATTTTGAATGTTTACGATATGGTAACATTTGAACGA  
 TGTGCAGTGATAACTCGTAGTGGTTGGTAACATCATTGTTGGCACGATGGCGTCTGGCGGT  
 GGTACGTACCGTTTATTTGCTTTTTATCATTTAATGGGTACCGTTAAGCGATATCTTTGTG  
 GAATTTTTGGTATTAACAATGTCGATCGACGTATTCTTTTATAATAGCGGAAAATACACCA  
 GAGGAAAGGACCGAGCCAGCGGCGCCGGCACAACCCCTCACCAATGTTGTGAGCGAAAC  
 AGCGCACAGGATATTAGCAATGAATAAGGATTCTGATCTCACTGGTGTGCCACCAAAGAA  
 GTCACGTGTCGAAGTACAATCTCTTCCAACGAGGCAATATTTGGATCAAACGTAGTACCA  
 ATTTTATTACAAGCTCTATCCACATTGGCCAAGGAAAGACCCGCAGATCCCATCAGCTTTCT  
 AGCTGGATATTTGCTGAGGAATAAAAATCAATACGATAATGGTGAATCTCCACCAACTAGT  
 CAATGAACTGCTTACGCATTATATAAATATGTGGTGAAAATTAAAGAATTACAAACATTTATT  
 GACACTTCTTAGGAACATACTCAAGTCGGGCAAGGTGTATTTGTGTAATTTGAATTAAATA  
 AAAATGTATTAGCTTTTTATCGTATAAAA

139. >MSTRG.2789.1 Gene=MSTRG.2789

CGAGCGAACGACAACAACGAAACTGTACAAAGACACGATTGATTAACGTGCATGCATATA  
 TATATATATATACACACATATATATTTCTCTATATTCTCTGTATATAAGAAGCGAGTAGAGTA  
 CGAGAGAAGAGGGAACATAGGAAGGAGAATACACGTACGTAGCTACCCGCCACGTTTTTT  
 TCTTAGTTAGCATTGCACGAGGCCAACGCACCCACAAGAAAGAAAGAAAGAAACCACCCA  
 CGCCACGGATTATCCGA

140. >MSTRG.2900.2 Gene=MSTRG.2900

AAAATACATATCATGTTACTCTTACCGAGAATAATCGAGCTATTTCCGACGATCAAAAAGT  
 GGAAAAAGTTCTTTAAATTTAGATACATTATAGATTCATAACAAATGGGAAATTGGCAAAT  
 GGAGGTTGGAAGAATGATGTCATATATATTATTTCCCATTTGGAGTTTATTATTATTTAATCA  
 AACAGAAAATATTGAAGAATGGATAAAAACTGAAAAGAAAAAGTTTCAAAATTCAGATA  
 ACACACAACATACAGAATTTATGAATTTTATTGAGGAATTTAATAAAAAACAACAGTTAAA  
 AAGAATTATAGAAATGGAAGTGCA

141. >MSTRG.2921.2 Gene=MSTRG.2921

AGAGAAAGAAAGAGAGTGAGTGAGTGAGTGAGAATGTGAGAGACTGCAAGGGGAAAAG  
 AAAGAGTGCGGAATAAACGAAGAAGAGAGGATAGAAAGAAAGAGAGAAAGATGATGAA  
 ACGGAGATGACGCGAAAGAGTACCAATATTCTAAAGTAATTCTAATGATTGAATTAATAAT  
 TTGATAATTAATCGATATTGTACATCGTAAACGACGTAGCGTGTAGGATATTAATCAACGA  
 GAACTACGAACGCGGCGAACGATAATTAATTCGTTAAATTAATTATTACTCGGAGGAG  
 CGAGGAGAAGAAGAAGAAGAAGAGAGGAGGAAGCGTGATCGGGCCACGCTGCCA  
 TTTTCGATTTATTCGTTATTCGTTGTATCATAATAAAGTCGAATGTTAACAGGCGCGTCTCGA  
 TCAGGCTTGCTTTACGATCATCTATAAATAATCTACGCCGCAACTGTCCACGCGATGCCGTC  
 TATCTAACGAGAAGAACGCGAATTCTCGCCGAAAAATATTGTCAAGCTCGAACATTCTCGT  
 TCTCGAACGAGGAAAAAAAGAAAAAGAAAAATAAAAAAAAAAAAAAAAAAACTAAAAGGAA

TCGATCGGTAATCTTTTTATACGTTCTAACGGCCATGATCGATTGCAATCATCCATCGTTTGTG  
CGTCGGAGCGGGAAATCGAGCTGGACGGAAGCACACGGCACCATGTGGAAGTCGATGTG  
GAGTAACGTGTCTAACCGAAGGAAGAAGAAAAAAGAAAAAGAAAAAGGACAAGA  
AAAAGAAGAAGAAGAAGAAGAATCGGGAACGTCGATCGATCGCCTCCGTGGATCGA  
CGTTCTCGTCCATTTTTCTTCCTTCGTTTCGGGCTTTCGAGCCTGTTTAGAAGAAGAAGA  
AGAAAAAAAAAAAAAGAAAAATAGAAAAAAGGGGAAAAAAAAAAGTGAAAAATCGAA  
AAAGCGAAAGAGAAGAAAGATCAACCAATCGATATAGGCGTATAAGTAAAAAGTGTAGA  
TATATCATAGTTAGATACAACGATCTCAAGAGGACACCCAGTGTGCGACGATCGCAATGAAT  
CGAAAGGAAGTGAGAGGGAAACGGGGCATCCTCGACGATCGTAGAAGATGCCTCGGTTTA  
CAAATTTTCAGCGTAATCTCGTGGCACGTAATTACCACGAATAATCGTTAAAGAGTCTGAG  
ATTTAGCAAGGAATTATATATATAAATATATATATATATATACATTACGTACGTGTACAT  
GTATACAGAGATTGAGAAGAAGAATACGAGATTATTATAAAGGGAGAAAGAATTAACAGT  
TTCGCGCGATCGCGTGTTAAATGAACGATATGGTTGAATCGTGAATCCGTTTCGTGTAACGTT  
TGTCATCGTTGCATTCACTCTCGATATAACTTGGTTTCCCATTCGAAATGGATTTATCGTTCT  
CTTATCCTTTTTCTTTTCTTTCTCGTTTCATTTTCATACTTTCATCGCTCCATCGCCCATCCACA  
CACACGCACACGTATATATATATATATACCTCCCTCCTCCACTTTTTCTAACTTACCACCAC  
GCGTTCCCCCCTCCCTTACTCCCATCTCTTCTTCCACCCACCCCCCATCTCCACTCGG  
CGGCTACCTACCGAGTGTTTCGACACTTCACCTTCCTTCTTTTCTTTTCTTTCGTTACTCGT  
GACCTTAGTATCGTGTTATTTATTTAGAGTTTCGAGCGAGTATAAACTTACCGCCGGATGTGG  
AAGAAATTAATTTAGGTATTCGCTCTTTTCACGTACCTGAAAGCCATCTGGCATAGCATATT  
TTTCCGAATCGCGAGTGAAATTCTTTATCGCTCGAAAAAGCAGAACGTTTAGTAGCGATAA  
CACCACCAATGCGGGCCACGTTACTGGAACAACATTACCGATTTCGCGGTTCGAGTTCGAGAT  
GGCGCGAGAGTCGGATCAATCGGTTAACCATCCAAACGATTTACGATTTATATTTTACTCGC  
ACACCGCGTTTTTACCTATTATTATATTTACGATAGACTCGAAAGAACTCGCGAAAACATTG  
CACAAGATATATATATATATATATGTATATGTATGTGTATATGTATGTATATGTATATATATATC  
GTCGAAGCGCGCGGATTAAAACGCCTAGAGAACATCGGTTTTTCGACTATCTTTTTTTTACAC  
AGCGTCACTCGTGGCTGTAAATCTAAAATGGCTCTCGGGTACTGTACCGTAACGCTTCACTT  
CACGGTGGTTGCGATCTTTTCTCATCACCATCACGGTATTCCGCATTCTTTTCGACGCGGGTTT  
TCCTTCGAAAGTCGACGAAAACCGCGAAATCGATCGTTTGATGATGGAGAAAGAAAGAAA  
GAAAGGGAGAGAAAGAGAGCGAGCGAGCGAGCGAACGAACGAGCGGGAGAGAGAGAG  
AGAGCGAACGAGCGAGAAAGAGAGAGAGAGAGAGAGAGAGTGTGTGTGAGGTAAAGGAAAGG  
AATGGGATTCTAGCGCCGCCAAATGAACGATCGTCGCAGTTCAGATACGAGTTTTCGAGT  
GTTCAAAGGTCCATCGGCATCGAGTACACCGACGACAATTTCTAGCACAAACGTCCAATCGT  
TCGTTGAACCGTGTTTATTGTTCTGTTTTCGTTTGATGAAAAAAAAAAAAAAAAAAAAAAGA  
AAAAAGAAAAAAGAAATACGAGAGAAAAGCGAAAAAAGAAAGAGAAGAAAAAAG  
AAAAGGAAAAGGGAAACGAACGAGAGGCGGTTTTCGTTAGTCACATTCGCGAGTGCTCG  
CTACTTCACCTCCATTTTTACCGTTTTATTGATTGACCTATGCTTCTCGCGAATCTTCCCC  
CTTCCCCCTCCCTCCACCCACGAGAACTTCAAGACGTAATAACCTATAGGACAAATTGTA  
GACAAATTTATTATCAAATAAAAATGAAAAAATAAAGCGACGTTTGAAAGGAAAAAAA  
AA



AGACAACCTACATTATACGTATAGGTTTACATACTTTTCTTTATTTTCAGTATTTAAAGTACA  
AAATCGTTACGAGTACGGGTAAGCGCCATTACAAGAACAGTCTCCAAAAGCATTAGAAAA  
AATAGAAACACCAAGAATGATGTTTGATTCTATTA AAACTAAGATAGCATCTACATCTAGT  
TCTCTCTCTAGACATCATTCTACAATACCTCAAAAAATGAAAAAATTACAACAAGAATGGC  
AGGCTGATTTATTA AAAACCAACATTTCTTTTACGAGGCGCATCAGATATGGCAATTTATCGT  
TTAACCATTGCAACAACCTTGATTGGTTTTGTTATTAATTTATATTATATAAATGAACTTCGA  
ATGAAATTT

143. >MSTRG.2942.1 Gene=MSTRG.2942

TGTGTTGTATGTATATATCTACCTACATAAATATGAGTAAACACAACAGTACCTTGCACCT  
GCCGCTCAGTTTGAGCGTAAGCGACCTGGTGGCTGGTGTTCATCGTTGTATGGCGACAGA  
GAGAGAGACTCACGCAATGATTCTCTGAGTCAGAAGACCAGGAACCAGGAGGAAGTTCCT  
GATTTCTCCAAGGAACAGCAGATTCTGGAGGAATAATGGATGGTGGACCCATAGGTCCAA  
AAGGTGGTCTGACATGGGGACGAATATCATCAAAGGGAGGTCTAAAAAAGGCATCTGATT  
CTCGGGGATCGAAAGGTGGTCCACGAGGTCCAAAAGGCCTCATTCCAGGACGAAGAGAAA  
ATGAAAATATTTTTACCTGGTCCGCGAACTCCTAAAGGAGTTGGACGTGGTCCAAATCCAT  
CAGGATGTCCAGGTCTTGACCTCTAGGTCCCATGATTGGTGGCATTCCAAATATAGGATCG  
ATTCCAAAGAATTCTCGTCTCCTAGGTTCAAATCACCTCGATCAAGATGCCCTCTTGATC  
GAAATTATCTTGAAGTCGCGGGTCAAACTATCTCGTCTTATTTTATAATCAAATCGATCAT  
CAAGTGGTCTTCTTCTCGTACTTCAGATCTATCGAATTCCTCCCTTTGTTCTCTGAGTGGTCC  
AAGTCTTCCAAAATCTTCTACTCTTTGCTGTCCATGTATTCTATTATCAAATTCTTCTTGATAT  
ATTCCTCCTTGCAACCTTGGA

144. >MSTRG.2981.1 Gene=MSTRG.2981

TCTAGATTCTAAACGTTAGTCAAGAAAACGCGGCTGATAGCATCGCGCGTTGTTAATCAAT  
CTAATCGTGCGCGGACGAATTTGGAAATCATTGAGATTTTAAAAAAAATTCATTATTTTTC  
AAAATGCGTTTCTGTGGTATCTACTTGATAGTTATTTTTACTCTCTGCACACCGTCCTCGTCG  
TTCAAGCTAAAACCGAATTATATCGAAGTGTACGACATTGACGACAATACCTTAAAGCAAT  
TACCTCCTCAAGATCCTGCATTTTCTTTTCCAACGATACCTACTGTTCCACTTATCCCTA  
CATGTATGAAAAAGGATATTTTCAAGGATCCTTTCAACTGCAAAAAATTTTACTATTGTGCA  
TACGTGAACGCTGTTCCAAAAGGTTTTTACTGTCAAATGATTTGATATTTAACACGATTAC  
CGATCAGTGTGATAAACCTAGCTTTGTAGATTGTTGATTAATATTGTATTCGTTAGAAAAAT  
TTGTAGTACAAATATTTTTGACTGTATGATTTTATTTATTAATTCTCATGTATGTATTATTTAA  
GAATTATGAATAATCTATGTCTTCAATGTTATAATATTAATATTTATTTATTATATCTTA

145. >MSTRG.3014.1 Gene=MSTRG.3014

AAGTAATAGATTGTATCGTGATCTGTGACCAGTGTGATATTTGTAATTAATTTTATATTGATA  
TTAAATTTTAAAAGAACACATTTATCGCATACAAAGGATTAGTGGATATTTTTTTACGTAAA  
TAAAATACATAAAATTTTACGTAAAATTACTACAAAAATGAATTATAATATTCATATATTA  
ATATGTCTTACTGGTATTACTGCTATTCATGTTGGTTGGAATATGGTACAGGAATATAGACC  
AGAAAAAGATCGACTAGGCAGGTGATCAAAATTCTGTTGATAATTCATGGAGGAGCTTTTC  
GCCCATTTCATTTTGACTGTGTACCGAAGCACCAGCTTTAGGAAGTTGTGGTAATACCAT

146. >MSTRG.3022.2 Gene=MSTRG.3022

GTTTTACTCTTCGAGCTTCGTCTACCGGTTAGCCGATAAAAAAGCTCCGCCGCGAGACTCGT  
CGTTGGACGGTGTTCCAGGCGCGTTGCCGTGTTGGTTTCTGTTTCGTGCTGAATTTTCATCGTGA  
CCGCGTTCTCTTGGTGCAGAGAAAATCCAGTTCAGTGGATGTACGAGAAGAGACGGACGAG  
GGGTCGAAGGTTGAAAAGGTTGGAGAAAAGAAAGGAAGGATGAAGGGGAAAAGAAGAAGA  
ATTTTCGACCGCCCCGAAGAAGAGGGCAACAAGACGAAGGGGAGAAAGGAAATTTTAAGGAT  
ATTGCCACGGTTATCTTCCACGATCTCGGCATCTGTTCTCGTGATCGTTCTAGTTGACGTCCA  
TGGCCTCCAACGGTCGGCTATAAGGGTGTCTTCCGTGGAAACCCGGGGGTATCTAGAAA  
CGGTGCATCGTGCATGCGCTAATCAGCCGCCCCGAAGAGTTTTACGGTAACTGGAGCACG  
GTCGGTCGATCCGGCGCGAAGAGGGGCAAAAGAGGTGAAGCTCGCAGAGACAGGAAGAT  
GGATCGTTGCTCAGGTCCCGCAGCAATGTCCTTGGACGCTGTCTGTGCCTTAGGACAGCAC  
GTAATCATACCAGTCCGCTATTACTTCCTATAACGCTATCTACGCCAGGAAACGCCATTGCT  
CGCTCGTTCTACGTAGAAGGATGAACTTGAGGAAGTGACGGACTCTCTGTTCTATCCGTT  
GCGGACGAATGGTCTGTGTCAACCCTCTCGAAGCGGTTGGAAATTAACTTTGAGTATTACAG  
ATGTCGAGGCGCGCCGCGGCGAGAAGCTAGCACCTTGTTAGTCTGACAAATTCGGTCCGCT  
TCCCCTTCCTTCTGTCTCCACTTTGCCGTATAAGCAGTTAGTTCCATTCCGCGGAGAAACAC  
CGAGCCTGTTACTTACGGGACTATCTATTTGTAAATTATATTTTCTTCTTTGATACAAGCAC  
AGGGATCTTTGCTTGATCCGTTTAAACGAAGTCCTTATCTTGTCTGTACAAATTCGTCTCCA  
CGCTGAGTAAATTAGTTGGCAGCTTGATTAAATGTAAACTCGACTTAATATAACCTTTTTTCC  
TCCTCTTTTTTTTCCCTCGTTTCGCGTTAAAGGGGGAAGTAATTTTAAAAAGAGTTTAATCTA  
AAAGAATGTATTAAATGTTTTTTCATAATTTAATATATTTTTTAAACGTATATACTCGGTTTTTA  
ATCCTCGGGATTAATATAATTTTATTGAATTAATAAAAGGATAAAGCGAAGAG

147. >MSTRG.3025.1 Gene=MSTRG.3025

CGACGTGGTGTGACACGTAACACGAGTGGGAAACGCACTCGAAACACGCGCCCTCCGAAA  
CGATAAAATGTCTGACAACACGAGAGAAGAAAAAACCGGGCAGTGAAGTGTGAGGAAACG  
AACAGGATATCACGGACCGCTATCCAGTGCCTGTTTTCGTTTGTGAACACCGTTTACGCAC  
GTCCTCGAACACGTCTTCTTGGGATCGCCGCGATCGCACAGATTGACGAATGACGACGTAA  
CAGAGAGCTGGCTGGTGCAGGATACTGGGACACAAGAGGGGACGGCATCTTTCAAATCG  
CCACGGCAACGGTTCATCACGAGATAAGAAGAATCGCGGGAAGGAAAATCGAGACGAGG  
GAGCGAGGGGCACCTAGCCCTTTGGCGAGCTCGAAGGATGCAGCTCCAGGCGGGAGCAC  
TAGAATTCCGCCCCGCGAGAGCACCGGCCTCAGTTCTCGTGATTATAAACGGAAGCAACATC  
GTGTCGAAGACTGTGACTGTGAAGAAACGTGACGGAGAGTGTAGCGAAAACGGCGGACCC  
GGAACGAGCAGCGATAGATACATAAAGAGTAAAAACGATAGGAATAACGATCCAGAGGA  
CGTGCCGCTGCTCCTGATAAGAAATCGCCATCCCGAGACGAGGACGACAAGCCATCGACA  
AGTCACCCGAGTCACCGAGAAGCCCCAGCTGTTGGCGTCAGGATCCCCAAGGCGGAAGGA  
TCGGGGCGAGGAATAGTAAAAAGAAAATAGTAGAGCGAGATCGAGGAACGACGGAAGAA  
GAGGAAGAGGAGGCAGGAGAGAAGGAGAAAAAGGTGAAGAGGAGGAGAAGGCTAGAGT  
TCTTTGGGAAGGAG

148. >MSTRG.3031.1 Gene=MSTRG.3031

AAATATCTCGTTTATCATTCGGAATATTAATAAAATGTTTCAAATAAAAGTTGAATGGTTTCG  
AAAGGGCTACATCCTGACGCTCTCGTTTTTTTTAGTAGGTTGACCAATAAAGAACTTTCAAGC

ACAACCTTTATTTTTTTTACCGATAACCTGTGTTTTTTAATGCACCAATCGATAGAGCGTAAAA  
TTTGCTACAAAAAAGTATTAACCCACTTATAGCGAAAAACCAATAGTTTAAAAGATATAGC  
AAAAATTAAAAATTTTTAGGAGGTCGACCTCCTT

149. >MSTRG.3031.2 Gene=MSTRG.3031

GAAGGGCTATATCCTGACGCTCTCGTTTTTTTTAGTAGGTTGACCAATAAAGAACTTTCAAGC  
ACAACCTTTATTTTTTTTACCGATAACCTGTGTTTTTTAATGCACCAATCGATAGAGCGTAAAA  
TTTGCTACAAAAAAGTATTAACCCACTTATAGCGAAAAACCAATAGTTTAAAAGATATAGC  
AAAAATTAAAAATTTTTAGGAGGTCGACCTCCTT

150. >MSTRG.3031.3 Gene=MSTRG.3031

AGCACAACCTTTATTTTTTTTACCGATAACCTGTGTTTTTTAATGCACCAATCGATAGAGCGTA  
AAATTTGCTACAAAAAAGTATTAACCCACTTATAGCGAAAAACCAATAGTTTAAAAGATAT  
AGCAAAAATTAAAAATTTTTAGGAGGTCGACCTCCTTCGTATCATGTTCTCCTAATACAAAA  
TCGAGTTTTTTGGGCAAAACTTTTTCTTCGGTCGCCGGAATTCGACGTTTACACTTTTTTTTAA  
ATATCTCCCTTATTATTTCGGAATATTAAAAAATGTTTCAAATAAAAGTTGAATGGTTTCGAA  
AGGGCTATATCCTGACGCTCTCGTTTTTTTAGTAGGTTGACCAATAAAGAACTTTCAAGCAC  
AACTTTATTTTTTTTACCGATAACCTGTGTTTTTTAATGCACCAATCGATAGAGCGTAAAAATT  
TGCTACAAAAAAGTATTAACCCACTTATAGCGAAAAACCAATAGTTTAAAAGATATAGCA  
AAAATTAAAAATTTTTAGGAGG

151. >MSTRG.3080.1 Gene=MSTRG.3080

AATGTGATAAGTTGTCATCGCATAAAATTATTAATGTTAGTTTGACAATGTAGTTTAGTCGA  
CACTACAGCGTCTTTTCAAAAAAATATTCTAATTATTTGATGTTTTAATATAAAAAGTGCA  
CTGGACTTACCGTACGGCAACGCGTACACTCGTATCATCAGACATTTTCGATGTTAAGTATTG  
TGCAATTCTTTAAGACGTAAAAGTAACAGAACTGAAGAAATCAACGAGAAATTACGATTA  
GGCTGAACTATTAGGCGACAGTTATAATATTTCAATACACGAATATACTGAATGCGCACGC  
GTTATTAGATGCGGTGGTTGTGAAAATTCCGCATTTTTTCGTTCGTGGACGCGCGCATAGATAA  
CCATAAAATCCACTCAAACATGTCTCATAACGAAAGGAAATCTCTATCCTAGCCGCGTCAA  
CTCAAGGATTGTATGGATCCTGAACTGAAATCATAACGTGACAGACATCTTTAATTCTTTATT  
ACTTAAAGTGACTATGTGCATCATCTGTTGATGGTTTTAAAACTACTTACTACTTTAAAAA  
TAACTTTATCAGTTGGAAATTATCGACTGTTTTCTATTCTTTTTTAATTGTTGATAACATTGGT  
CACTTTTCCGGTTACGATCATTCTTTCAATATAACAAGATGGCTGATCAGAGTGAACGTGCA  
TTTCAAAAGCAACCCACGATCTTTCTTAATCGTAAGAAAGGTCTGGGTCCCAAAAGACGGA  
AGCCTATGAGGTATAGTCGTAATGTAGGTCTTGGTTTTAAACACCTCGTGAAGCGCTTGAA  
GGAACCTACATTGATAAAAAATGTCCATTTACTGGTAACATTTCTATTAGAGGACGCATTCT  
TACTGGAGTAGTACAAAAGATGAAAATGCAAAGGACCATTGTTATACGTAGGGATTATCTT  
CATTATATCAGAAAATACAATCGTTTTGAAAAACGTCATCGTAATATGAGTGTTTCATCTTAG  
TCCTTGCTTTAGAGATGTGGAAATTGGTGATGTAGTAACAATTGGTGAATGCAGACCACTTA  
GCAAGACAGTTAGATTTAATGTTCTGAAGGTTTCAAAAGGAACAGGATCTAAGAAAAGTTT  
CAAAAAATTTTAAGGAGATACTAATAATATTGAAGAAAAGAAGGAAGTTATATAAATTAT  
CATCTTGACTTGTATCTTTTCATGTTACAAATTAAAAATAAAAAACATTTCTAAATAAAAAACA

152. >MSTRG.3161.6 Gene=MSTRG.3161

AGAAACGGTATCAATAAAAACGATCAGCGATTGCTAATATCTAGACATGAATCAAACATTT  
GATAAATAAATAGGATAATATATTCGATTGTTACTTCGCATAGAATTATATCGTGCGACATT  
CTTCTCCGTTACATTTGTCTATTTTAATTTTCGGAGATCGATATATATGTAGGAAATCGCGAAT  
TTCGAAACGTAGATAAAGATATACGTCATATATGAGAATTGTTCAAAGAGTGGGCAAAAG  
AATGGTAAATTTGGCAACTGTCACGATATTTAGGAATTTCTATTTTCTTTCTTGAGCAAATTT  
CGAATACCATTTCGCTTTATAATCGTAAGAAATATAAGATAATCGTTGAAATTTTTCCATATT  
TCATCCGTTATTATTATTATGTTTTTTGAAACAAATTAATTATAAAAAATTAGAAAATAAATA  
GAAAGTAAATATTTTAGAATGAGAACTAATATCGAAAGAATCAATATACGCACACACAT  
ATAACACATCATCTTTGATCCTTTGGTAAATGCGACACGTGTTCCCTCACTAATAGAGACACG  
TGCTGTATCATGTTTGTTTTTTTATTCTCATGGTTCTTCTACTTCTTGGTTAGACGTACGAAGG  
ACAACCTTGGCTAATGGACACTGGTGAAACGTGTTCTGCACAGCTCAAAGCAACTTACTGT  
TGGTACTATGTACTTATATATGTCTAACTTTCAAGGTGACTTCAATCGCCTTTTTTTATGCCA  
ATGAACTGTTCTCTGACGAACTTAGACACGTGAGTCATTTCGTTTTTCGAAGATACAATATTTT  
TATCTCTTTTTGAAAACACCAATATTTTCTATCATATTTAATTTGGATCTCTAACATTTTTTGTA  
AGTTTCATATCTTTGAGAAAACCTCGTGTCAACGTGACTTTCTTCACAAATTGATGCTAAAGA  
TTATCTTGGTTAATGTTTATACTATTATTATTCATCTGGGTAACCTATCATTAAATGAAAGCAGG  
AATATAAAGAAAAAATATTTGTTGATTACTGAAGTATAGAAGAATAAATGTATATAACAAT  
TAGATTATTAGATAATTTTTGAATTATTCTTAAATTAGAATAAATTAGAATTATTTTCAGTTA  
AGAAAAGTCAGTTAAGATAGATGAAAAAAATAGCATTTCGTGATATATTAGATTCATAAATG  
CGCCCAAGGCCACGTCACGCTGCAGCAAACCTCCCAACCCCCCACCCTTCAAATATCGTCAT  
TTTGACTTGTCTCACGAACAGTTCTGGATGTATCTCGTTGATTTCGGGCGCTGCAGAGGGAGT  
GGGTGCGTCACACCCACCGATAGCAGGGGTGGGAGAAAGAGGTGGGGTACACCGCATCGT  
CGATCCACCCCTGCTTGCTTATTATGTTTACAGATTCATATCCTGTTTTTGCTACTTTGAAGAT  
TCTCTTCTGTCTTTATCCCCCCTCTCACAAGTTTTAATATCGCGTAGTTTGATTTTATCTCTTC  
CTCTTATCGTTTTCGTAATATTATTCTACTTCTTATTATTTACCAAAAAACAAACATTGTAGTA  
AAAAC TACAAATATATTCAAATCATTCCAAATATTTTCATGGAAAATAAAAAATTTAATGGA  
CATAATACAATCTATAATCTAATCTAAATCTATTATAAAAAAGAATCGAGATCACCGGTTT  
ACCGTTGGCGAGGAGCAAAGAGGCGGGATGGATTTTGCAGGAAGGAGCTTGTGCGATTGTG  
CAGAACAGAGCGAGATAGAATTGCGTTTGGGAAGGGGAACGAAGGTTAGTCCATAGGGCC  
AGGCAGTCCCGCTGTATTGACGCGCGGCGCACAGGCTTGC GCGAGATGACGCAATCTCCCT  
CCCATGCGCCCGGCTTTGCTCGTACCACGTTCTACTCCCCTCTCTTCGTCCCGTTGCTCGTG  
TTTCACTCTTCTCTCCTACCTCACCCGGCAGCTCCCATAAGTTCAATGCCAAGGTCAAAACG  
TCCACGACTCGTAGCCGTGTGCGTCGCGATACTCGTTGCGTGGGAGAAGAAGTAGCTGTGT  
GTGTGTGTGCGTGTGTGTGTTGCTGCTCTCTCTGATCGTATGCTTATTTGCTGGTATCGCTC  
ATCCATCGTCGTGGTCATCATCGTTGTGTGCTTTTCATCGTGTATTCACATTTACCTTCCTGTGCG  
CGTATCGCGCGCGCTTTTTCTACCGGTTTCTTCGCCGATGCGCGTTACGTGCCATGATTTTGT  
ACATGTACACGCAGTTTCGTTTCGCGTCGCGCGACTAACCTACATTACACGACGTACGGAC  
ATGTTGAATTACGCCAAGTTAAAAATGTGTGTTATGATTGTGTGCGAATACAAGGCATCGAA  
AAAGAAATGAAATATTGCAAATAAATCGAAGTTAATGTAAAATGTCATATGCAGTTATTCT  
TCAAGAAATATCTCGATGTTGTGACTGTAACCTGTGTTCTGAAATCATTTTCGAGACAAATCAT  
AAGTGTAATGTGCGAATATTGGAATATAGAACAAAAGTAGAATATCCTACGCGACGAAA  
TACGGATGCGCATCGTGTGAAGAATGGATATAAACTATCGTGACAAATTTTCGTCTGGTTCTG

GCTACGACTTTGAGAGAGGACGGTTATCCTGATGGAGGGGAGTGGAACGCGACTGAACAG  
GAAGGCGGTTCCAGAGCAGACAGTTTTGAATATGTGATGTCCGGTATGGTTTATCGAATAG  
AAGGTGATGAAGCAAGCAATGAACCCAGCAGTAGACTATCTGCCTACGTATCCTTTGGAGG  
ATTGCTGATGAGGTTACAGGGTGATGCAAACAACCTACACGGTTTCGAGATAGATCAACAT  
ATGTACTTACTCATGAAAAAGTTAGCGTTCTAACTATGTTATATTTGTTATAACTATGTTACA  
ATTATAACTTAGAAAATATGTATTTTAAATATATTCTTTTTTCATGAGGAATTATTTTAAATA  
TAAGATAAAGATAATTGAACTGAAAAAATATTAATGATTGATGCGTACACAAAAATGTATT  
GTATGTGTATTTGATCTATAACAGTATATTTATGTAAGAAGAATGTTTGCTAATTGGTTGATC  
ATTTTCATGATCACATCATATTTTTCAGTTCATGAATATTTTATTAAATATTGTCACTGCCATTG  
G

153. >MSTRG.3180.1 Gene=MSTRG.3180

AGACAGCTGATTGTCGCCATATTTTATTGAATGCTTGTAGCGCCAGTTATTCAGAACTATGA  
TAAACAATCTCGAAAGAAGCATAACATCTTGTGCGATTATAGAATAGTAATTTTGGAGTG  
AAGTTATTGACTTGTGTCGGGTTATAGGGTGTGATAAGTATCATACTAAAGAAATAAATT  
TTAGTAAATAATTGAAATGGGTAGCACAGATAAAGCTGTGATCACGGGTTTTATATGTAGA  
CTTTGCAGCAAAATGAACCGTTTCGTGATCCACATATACGGTGAAGAGGGTGAAAGAATGA  
AACTTGCTGAAAAAATAAATGCTTATCTTCCAATTACGGTAAACATGAATGACCCATTACC  
TAAAACAGCATGTCTACATTGTATCGAACGACTAGAAGCTCATCATGAATTAATGGGACAA  
TTTTTGTTAGCTAAACGAAGATTAACAAAATCATCAACAGTTGCATCAACTTCAACACAAA  
CTGTTGATACTGCGCCAACATCTAGTTCACCTCCATGTTGACATATAGAATTAAGCATAT  
CTTTACGCTCAATATTATTAAACATTTTCTGTATCTTA

154. >MSTRG.3183.4 Gene=MSTRG.3183

TAATATATTTATTCGTTTGTAGAGAATTTTATAGTATTATATTTATTTGTAATATTAATAAATTG  
TAAATATATTGAAAAGAAGAATAAAAATTTAAAAAATTATAAAAAAATAAAAAAGAAAG  
AAAGTGATCTTTAAAGATAAATGCGCAGACGTGGTTTTGCACTGAATTGCTCGTGTCCCGTC  
AAATAGAGGGAGTGAAACAGCACCTGCTGCCATTCTGGCATTACGTCAATGGTAGACATTT  
CATTTGCTGGTTGGGGAGGAGTTACCGTGACCGCCATTGTTACAGATCTTTCATATTAAAGA  
ACGTGATCTGTGAATTTATATTGTCATATTGTTGATTTTCATCGAATTGTGTTTATTTTTTAGAT  
TTCCGCAACAACAATACAGATATCAGTAAGAGTGTTCTTAAGCATAGCATGTCCACTATGA  
ATCCCGAGTATGATTACTTGTTTAAGTTACTTTTAATTGGAGATTCAGGAGTTGGAAAATCA  
TGTCTTTTACTCCGTTTTGCTGATGACACATATACAGAAAGTTATATCAGTACTATTGGTGTA  
GATTTCAAAATACGAACAATTGATCTAGATGGAAAAACAATAAAATTACAAATTTGGGAT  
ACAGCAGGTCAAGAACGGTTTAGAACAATTACAAGTTCTTATTACAGAGGTGCACATGGTA  
TTATTGTTGTTTATGACTGCACAGATCAGGAAACATTTAATAATGTTAAACAATGGCTCGAA  
GAAATTGATCGTTATGCTTGTGATAATGTGAATAAGTTGTTAGTCGGCAATAAATGTGATCT  
TCATACTAAAAAAGTTGTTGATTACACAACAGCAAAAGAATATGCAGATCAACTTGGTATA  
CCATTTTTGGAAACATCTGCAAAAAATGCAATGAATGTAGAACAAGCTTTTATGACAAATGG  
CTGCAGAAATAAACTTAGAGTGGGTCCTCCATCAAGTGGTAACAGTGATCCAGCAAATA  
AAGTGAAAATAGAACATGGACGTCCAATTGAATCCTCTAAATCTGGATGCTGCTGAGAAAT  
GTAATTTTGCAATTAAAACCAAAAAGGACATCTTATGGTAGCAGTTTTATACTGCTTAAAG  
ATTACAAGAAGACATAAGAAAGATTGTGGAAGTTTCAGTTTATATAAAAAAAAAAAAAAATG

AGGTGTGAAACATTATTAATTATGGACCACCAACTCTATTATAGAGTTGAATAAAACAAC  
 TTTGTTCTATCTTCTTTTTTTTTTTTAAAGAAAGAAGAACATAATTATTCATTGCTAATTATTT  
 AATACAAAAAATTGACCATAGATAATTTCTCGAAGCATTGATAATCATTGATTCTATGCAAT  
 GATGTGTTTAACAACAATTCGAATTTATAAAATACGTAATACTATGTATCGTGTTATAAAG  
 ATAAGCACTTTTATTTTTTAGCGTTATTGTAACATGTATAATTGAATATTTTTGTCTTAGAAC  
 AGTCATTCTTACTCTTCATATTACCCAAACATTTTCCACATCTATTCCAACCTCTTGAGATAA  
 ACAAGAATTAGAGTAATGATATAATTGAAACATGCCGTTGTTGCTGCCTCCCTCTTTTTTTC  
 AGTGCTCATTAGTATAATTTAACAATGATATATTAATAAATATTTCAACATTATTACAAAA  
 GTTGTAACTATTATACATATAAAAAATGTGTATATGTGTGTGTGTATATATATATATATA  
 CACACACGCATATTA AAAACACTTCCAATTGGTAACTTCTGTAAAGTTACATCAATTTTTTA  
 AACTTGCTACTCATAAAATTTATGAACTATTTCGCCTATTATAAATACATCATACCGTTTGT  
 AAAATATTCTAGCGTTTGAAATTCAATATATTTTGTCTGTAACATATTTCATAAAGTGTGTT  
 TCATATGAATTTGTAAGATAAAATTTTTAACTACAATATTACTTTACTTTTGCATCAATTAT  
 TATTCAAATCTAGTTATATTATTTTGTATTACATACTCGTTATCAATTGTTTTGCTTTCTTATA  
 AAAATACTTAAAAAATATTTAATAAATCAAATTACTCTAGTAAAATTTTATTCTGCAATATT  
 AATACCAAAAAAGACTTTATATATCGTATAAAAAAGAAGAAAGAAAAGAGAGAAAAGA  
 CATATTTTGTACAAATACAAAAAATATTACGATTGCAATTAATCTTGTTTTGTATTGTTATT  
 ACAGAAATTTTATGAAACAAAATAAGAATATTTTCGTAATTATGGGATTTATTTCAATATAAT  
 AATAATATGAATTAATTAATAATAATGTATGAACTTCATAAAAAGAACGTATGTAATAAG  
 TAGAATGTATGATTATAAAAAATAAATATCATGTATAAGTTGAAAATTAATTATTTTTTATA  
 AATACATTAATTACAATCTAATTTTAATTTGTAATGGTATATGAACTATACGATATATTTAC  
 AGATATTCAAGTAAGTATAAATGTATATGTTCTTCTTTGTATAGTTAATATGAAATAGAATA  
 GGATACATTA AAAAGTTAAATAATTGAAAGATAAAATGTTTTTAGTCAAATTGTAGTTTTTA  
 ATAAATGATTGATAACATTTTATTA AAAATTTATGTATCTTTTTATTATTTTATTTAATCGAAA  
 TAATATTTATATTTTACAATATATTGTAACCTTACTTTTATAATTGTCATTTGAATTTTATCAA  
 AATGATGCAACAGTATATGAAAGAATTAGAACAGGATCCATTTGATCCTGAAGAATTTGTT  
 GAAAGACTTGCTTGGAGAACACTTAATGATACGATAAAAGACGATGGAAAGACATTTTTCG  
 ATCCTACAATAGTGCATGAGACATTTTACAAGCAATTAAAGATTTACAAATTCTACAAGA  
 ACGTCAACAAAAAAAATGTGATAAACTTGAAACAGCATTAAAAGATGAAGAAGCAAAAC  
 ATATACTTGAAATTCTTGAATTACAAGAAAGAAATAAACATTCTATTGATCTCTTTCATCAA  
 TTAGATGAAAGAATAAATCTTGTGGCTACTAAAGTTTACATTTAGGAGATCAATTGGAAA  
 GTGTTAATACACCAAGAGCTAGAGCTGTTGAGGCTCAAAAATTAATGAGACATTTTTCAGA  
 TTTTTTAAGCCCTGGACCTTTGACAGATCCAATTTTACAGATAAGTCATCGCTATATGAAG  
 CAGCAGATGTGATACAAAACTTCACCTTATTTTACAAGAATTACCATCTGAAAAATTGA  
 ACATGCCAAGAAAAAATTACTGCTAAATATGATGAAATTGAAAGAAATCTTATAGAAGA  
 ATTTGTTAGAGCACATAATAGGGAAGATGCTAATCGTATGAGAGAATTAGCATCAGTCTTA  
 ACTCATTTTAAAGGATATTCTCAATGCATAGATGCATTTATAGAACAAAGCCAGATGGGTT  
 CATTTGGTGGAAAGGATGTTTTTCAGGATGTTATACCTATGTGTACGAAATATCACAAATTA  
 ATGCAACAAGTATTTACAAATCCTGAACAAGTAAT

155. >MSTRG.3216.1 Gene=MSTRG.3216

GAAGATGGCACTGATTTTTATTCTATTTTTTTGTTCTTCTTATTATTTGCTTTCATCTCTATA  
 TATTCAATTGTAATAATAGAAATGCTTGTTATCACTTACAAATCAAAAAATGAAAAAGATA

TAAAATTTTTCTTTATAATAAAAAAAAAAATAATGATTGTTATGTATATATATAAAATTTCTA  
TATTTATTTACGTCATATAATATAAACATATTAATATTAGGTATGGATTAGCTGGAACATAA  
ACACTGTGGGAGTGAAAATGTGTATGGCGCGGTGGTGATACAACACGTAAGCTTGTACTT  
CATGAGGATAACATGGATGCTCATATTGTGCTTGCCGTCCTGTAGGTAAGCCTTCTTTTTCA  
AGAGGATGAGACCAATGAGTAGTTTTGTATTGTGATCTATATAATATTTCTACCTCTAAG  
AGTGAAGTCTACAGACCATCCAGGAGGTGGAGTTTCTTTTTAACATATTTACCAACAACCTC  
CTTCTTTAATTGTTCTTAAATCCTTATTTTTTCGAGACAACATAATGGAATAAATATTTGATC  
GAACGACAAACCAATAAATCTTCGATATTTATAACCTACAGTCACGATATTATATTCGTAA  
AACTAATGAAAATATATTCCAAATGTATAATGATGTGGTCAAAAATAACAAATTATTCATT  
TTATATATTTGTATAAAATTTGTTTTAATAAAGATTCAAAGATTATTAATAAATTTCTTAACTAA  
ATTATGTACTTGTACATGTATGCTTTTCATAATATGAACGTTGAAAAA

156. >MSTRG.3227.1 Gene=MSTRG.3227

TGCGTTCGTAGTCGCTAACAGACTAAAAATCCCCGGGAGTTGTTTATTGATCGTTAAAAATT  
CGTGCTATTATTCATCGGTTAAATGCACTAATAATGGAGAGATTTAGTGTAATGAAAATC  
AATGTATTAAATAAATTGATATCTATAACTGTTTGAACATAAATAAACTTAAAAGTTAAAAA  
AAAATTCACAATGATTCGAAATTTCTTTTTGATCGGGCGGTTAATAGACAATTGAGACTGTG  
TCGCGTTGTCGAGGCGCAACTCCAACACGTGGGTCGATCAGCTGAGCAACTACGCTCACTC  
GAAACTTTTTAATGTGATCAGTATCGATCTAATGAAGAAGGACCAATCATACCATAAGCTA  
ATGGAG

157. >MSTRG.3279.6 Gene=MSTRG.3279

CAGAGATAATGAGACGCGGGGATTGGGGATGGGAATGTATAATAAGTAAAGTTGGGGGG  
TGGCAGAGAGGTGAAATGGGGGTGTATCGATCTGCTGGGGGTGAGTTGGGGGTGGTGCGC  
CTCCCAACCCACCTCTCCCTCTTTCTACCTCTCACCCGAGTCTCTCATACCATCCTGCCTCCC  
GCCATCCTGAACTAAATGAATGACTGACGCAGGGGTGGTTGGTGGCAAGTGCAGAGCAG  
CAAAGGTCAGAATCTCCTGCAAACACGCAGAATCAGAACTCGAGAATCCAGATACTACT  
AAGGAAATGACTAATAAAGATGGGATCGGGCCCAAAGTGATGAACAAAGGGGGCGGGAA  
GGGGGGCTGGCTGAAGGCCCACTGTCAGAGGCTCAAGAGCCTCATGGTGAGTGAGCAGT  
CAATTAAGGTGCTCCTTACAGATGAATTTCAATTTATTTTTTCATTATTTTTCTATAAAATT  
ATAAAAAAATATATTAATTTGAAAATTTAATGAATTTATAATTAAGAAATAGCAAATA  
AATGATTTTCATCAAATATGTGAATGCTGAAACAGTAATAAAAAATTAAATATTAATTAATTC  
ATCAGTAAGTATTATATAATATGCATCTTTAGTTGTCTTGTAGTCTCATATAGAAGCCAGT  
GATGATATAAGGCTAATGATATAGCGGCGGGATTTATAAAATTCTTTGTAATCTTGGTGAAT  
GTTATAAGTTTTAGCTATTTCACTGTAAGGCCAAAGAGATAATAAATTGGGTTTAATTATGA  
CCTCTTCCTTTAAGTTATGTAGAAAGGGGTTAATCATTAATATAAAATTTAATAAACCCA  
TACATTATACATTAATATATAATTATAATTATTCAATTATTTATCATCTTCTATAATTTTCCTT  
TTTTTTTTTTTTTTTTTTAGAAATCATTGTAATGAATAATTTAATTCAATATGTAAATGCTAG  
ATTTGTTCTCTGGAAAAATTGTTATAATTATTCTAATAAATAAATCTTCTCTAAATATTT  
AGAAGAAAATCCCGCCGTACAAAATGATAATCTTTAGTAATCTGAGGCTTCTTTAAACAA  
TTTATATTTCTTTGAAAATTAATTTCAATTTCTATTATAATAAATAATGTATCACTTAATGTTGC  
TTTAATTTTCATTTTTTTGTTACCTGC

158. >MSTRG.3292.1 Gene=MSTRG.3292

TCTATATTCATTGTAGTTTCTATAATATATATAATTTTTTTAAGAAGTTTAATTATATAGTAAT  
TAAGCGATCTGTCTTTAAATTTAATAGTACATTAGAAATTTATTAAGAATTATTTTTTC  
TATAATATATTGGGAAATCAATTTTTTTTTTATTATTTGAAAGATGGCACTAACCAATATTTT  
ACTTCTTAGTCAAATATCTGGATATGTCGTAGCTCTTGTTTTGTCACCTTGTATTATCATACCA  
ATGAGTTTACATGAAGATGAATTTAGAGGACATTGTCTGTTATTTTCAACAGGAACTTGGCA  
AGAATCAGATGGTCAATTTATAGTAAATTGGGCTTCACAAGCTTATTGAAGCACAACATAA  
TGTTGTGGTGCACATGGTCCTTGCTATATGCTTCATGACAACTATTATTCAATGGAAAATAT  
AGAAATCCAGGCTTACAATCACATATCCATGTACTTATATTTCCAACCTCCAGAATAAAGAA  
GCATATTTTTAGGACATGAGTCTGGTATAAATATTGGATTACGTTCTGTTATCTAATTAAAG  
AAAATTTTTTTTTTCAACAAATTTTTTAAATTTATTTTACGATTAAATTAATTTTTTTACCG  
TCTTAATATTGCC

159. >MSTRG.3297.1 Gene=MSTRG.3297

CAGTAGACTTTGCCGAGTTTCTTCGGCCGATCGCCGGCTAAACGATTTCTTATGCCGCGAC  
ATTGAACGCTTCGTTGTTGAGAAACCGCGTTACATTTTTTTCTTTCTTATATTCTCTGTCTTTT  
CTTTTAACAGAGTGCCTTCTTATTTGACGAACCTGTACGAAGAACAAATCTTGTGGCGCG  
ATTGATTGCACATATAGATATATCTTACGTACGGTGAACGAGGGAATATCGCAAATTCGGT  
GACGGTACGGATGGCAAAGGCATTCTGGCGTAGCAATTACCTGCAGGGCGAGGGAGTCAA  
GTAGCAAT

160. >MSTRG.3306.3 Gene=MSTRG.3306

CGCCGAGCCGATCAGCAGTACGGTGCTCGCTGGATGCGACTGTTTCGCGTTAGTGATGATC  
AAAACGAGTTGTCGTCGTCGTTGTTGTGGCATTTCGCGAAGTCGAAGAAGCCGTGATCCGT  
GATCAAAAGCTCGAGACGGAGAAGAGGCCGAGGACACGCATCGTCTCTCGTTGCCGCGGC  
CACGGATGCATATGGAGGTGTCCCCGAACCGGCGCTGTCTGAACCAGCTCAACAGCTGATC  
GGAGTACGAAGCGGCGGTGAACGGGGCCACTATTGCACCACCACCCCGCGATTTTCGAGAA  
ATTCGTTGTATCAATCGGGTTGTTAACGGCCAGACGTTGTTCCACGAACGAGAGGAGGAG  
AAGAAGAGGACGACGACGACGACGACGACGAGCAGCAGGGGGGAAAAGTGGCGTTTTGACAC  
TTGATAAAACGAGGGAAGAAAATCAACGACGACGACGACGACGACGAAGACGAAGACGACG  
AAGACGAAGACGAAGACGACGACGACGACGACGACGACGACGACGACGACGACGAAGA  
CGAAGAAGAAGAAAACAAGGGCGAAGTTTCCTTTGCTTGCTTGACACGCCATCATGGTCA  
AAACTTTTCAAGCATACCTGCCCTCGTGTACCCGCACTTACTCGTGCATTCACTGCCGTGCT  
CACCTCGCCAACCACGACGAACCTCATCTCTAAGGTGAGCCGTGCTAGATCAGGTAACGGAC  
AGACTTCTCGCATTCACTTCCGAGCTCGGTACACACAGCATGTATACCGTGATATGCGTATT  
ACGTGTATGTATATATATATTGTGCACATATGTATACAGCTAACGTACAGTCTACTGTAATA  
AGCTTTTTCTTCCTTTTGATTGCAGTCCTTCCAGGGCAGTCAAGGTCGTGCCTATCTCTTTAAT  
TCCGTGGTGAACGTGGGCTGTGGTCCTGCGGAAGAGCGAGTTCTCTTAACCTGGCCTTCATGC  
TGTGGCTGATATTTATTGCGAATGTTGCAAGACCACCTTGGGTGGAATACGAGCATGCG  
TTCGAGTCGAGTCAAAAATATAAAGAAGGAAAGTTTATAATCGAGCTTGCTCATATGATCA  
AGGAGAATGGATGGGAATAGATTGAGTTGGGGGTAATCTGATAAGCAAAAAAGAAAGAG  
AATAACCTCTATAAAAATATATATACGAGGCCCGTTCAAACTTTTCCTGATATAAGAATA



ATGCCTACAATGTTGTTCTAATTGCAATGTGCGGCCCCCTCTCCTCTGTCAAACCAACCAAC  
GAAAGTCTGTGATTTCAATTTGTGATTTGTAATCTTAGTAACTTTTATGTTTCGGACAA

161. >MSTRG.3336.1 Gene=MSTRG.3336

CTCGACTCGAACTGGTGGCGAATGGAGTTAAGAAAGGAATGATACTGTCCTTAGCGATAGC  
TTGGAGTAATCGTGAGCGCCTGTAAAGATTGAAGTCCAGCACCAAGAGTGGACAGGAA  
AGATCCAATCAAGATGACCCATTGATTAGGCCAAGCCATATTCGCTACTACCAGTTTGCCA  
CCAATACTTTGGCCAACTTATCTCGAAGCAGAAGATTGTCCACTGTACCAGCAAAGAGTA  
AAACACTGGAGAGATATACTGTTGAGGTTGTCAAAATTGCACAAATAGTACCAATAGGAA  
TAGATTTTTGGGCATCTGCTAAGTCACCTGATCTATTGGAGCCAGCCATGATTCCTGTGACT  
GAAGGGAAGAAAATACCAATAAGAATGGTGAAGGTAGTGGTAAGATCGACTTGAATTTGA  
TTGAAGGAAGAATTGGACATCATGTCAATATCCTTGGGATCTCTTCCATAGGCAATCAATTG  
GCCTTCTTCTTGAAAGCTGTCCCATATATTGTCTAAAAATACACCACTAGCCAATCCACGAA  
TTCCGTTTATAATAGTCACATCGTTTTCCATATAATAAGGATCACATTTGCTAGTGTTGTGT  
TTCCACAGTAAAGTTGATGAAGAATTCCACTAGTATTCTTATTACATTCGGTAAGTACGTTG  
ATATCTTTTAACAATCTCCTTCCAAGAACACACATCTTGAGAGATTCGTTGCCATTAAAGTT  
ATAGAATAACCCTACGTAGACAGCCACGATAGAAAGGATGACACAAGCTAGAGCGACCGT  
CGCAAATTTGTTGACGAATTCACGCCAATGAATACGATGGTGCCCATACCATAAGCAAT  
CCAGTACCATACACGCGAAAGTTATTATACATGATGTTAGGGTCTTTTGTAAGTCTCCAAA  
TATACTAAGCGATGGCGCCATGTAAGTCAGAACAAATTTCAACAGCACCGATGATATACATA  
GCAGCAGCTAGTGTAGTACCCGTATAGAAGAGCATTCCTACGGCACCACCGAATTCTGGAC  
CCAAACTTCTGGATATCATGAAGTAAGACCCTCCAGCTGGTACAACGCCATTAGTCGCGAT  
GGCACTCATACTGATAGCTGTCAGCATCGTCACGCAACAACAACATAACACGATGAAGAA  
TCCCTGAAAAGCTCCAGCGGTGCCAACGACCCAGGTCAAACGAATGAATAGAATCACGCC  
AAAGATGTTTTGGATGCAAGGTAGGAAGACACCGATCAAAGTGCCCATTCGTGCACCACCT  
TGCACGGGTGGAGGTTTCGCATCCGGGTGCGTCGAGCTGGAATCGTGTTGCTGTAGTCCG  
ACAGGCTGTTGAGCAGCGTGGAATTCGAGGACGAACTTCCATCTCTTCGCTATAGAGGAA  
GAGATTCGTCTCGTATTCCGTATTCTTCTTCGGAATTACCGCCGCCACCATGGAGTCGC  
CATCTCCGCCAGCGCCGCCCATCGCCGGCTTCATTGCGGCTGGCGAGCCATCGGGCAT  
GGTTTTGCCCTGGGACTTTGGCGTGCCCTCGCTCATGCTTTCGCCACGACTTCGATCCTTCGA  
GGCTGGGTCAGTCTCTCCA

CTCCTATTCCACTCCTCTCCTTCTCCTCCTTGTTTACCAACTTTATCCTTTTGAAAATCCTTC  
GAAGCAAACCCTTTTCCAACACCAACCTTTCTCTCTCTTTCGTCTATCTTCTTCTTCCCCTCG  
TCAAAATTCTATCGAGATCGTTGCAGTTGACACTTTTTGAACTCGTCGTTTCTCGCGAAACA  
AATCCCCACTTTTTCTTCTCACTTTAATTGATTTTAATCTTTGGCAGAAACGATGACGATC  
CTGTCTTTATTAATTCTTCGACTCTCGACGAATATATTTGGAATATATTTTAGACAGTTCGAA  
CGAGACACTATTAGACGGGGTGGTTAGAGAAGAACACGGTCGCGCACGGAACCCGGACG  
AGTCTCGCGGAGGGTGTGCGTTGGGCTCAACGCTTCAACCTCATCTTCCGCATCCCTCCTTC  
CCACACGGCACACGGAGAGAGGGCGGCTTGGGTACGCTCGTCTTGTGCGGGTGTCAACAAG  
TCACGGGATCACCGACAGGATCGGGTGGTCCAGATCGAAAGAGAGGAGCCGCACGCACGC  
CAGCCGGCTGCTCGCTCGCTCGCTAGGTCGCGCACGCTTCTCTAATTAAACCACGGCGGAA  
CGACGATCCCCGGAAGTGCGCGTCCGTGTTCCGGGAGGATCGATCGTTCCGATTGCCACGGA  
GGCGCATCGACAGGTGAACACCGACCGGGTAAATTTCTCTCCCTTTCTCCTTCTCTTCTTCC

TTCCTTTAGTTCTCCCGTAAGACTTTCCTCCTCGATTTTCGCTCGAGTTCGATCGAAACGATT  
 TTCCAAGAAGAGAAGAGAAGAGAAGAGAAGAGAAGAGGAAAGTGTATGTGTCTCGAGCA  
 ACGAACAATTTCGAGCTCGATCCCGCGCAGCGCGTAATATCTCGCGGACGAGCAGTTGCAA  
 GCTCGTTGGAGCGAAGGATTTACACCGGGGTTGGGATTCTGGGGGTGCAGGTACACCACCC  
 TGGACGCTCGTCTTCCTCGTGGACGCTGCGGAGTGCTGGACCACCTTCCTGCCTCCCTCCGC  
 CTACCCCTCCCGCCGCGCTCCCTCTATGATACGTCTCTCCTTCTCCCGTCTCCACCACCCG  
 TTTGACGGCGCTCCGGTTCGGTTCGGTGTGTCTGCTGCTCCGCTTCCACGAGACCTGGATTCTG  
 GACTCGGCCTCGAAGGAAGGCGGTGCAAGTGTGGAGGAGCACGAGTCGATGGATGGATA  
 CGCGTCGAACACGGGAGAGCGAGAGCAGCGATCACCTCGTACCGCACCACAAAGACGAC  
 CACCGCACCGCACTCGGGGAGAGAAACAACCACGACCGGAGGTGCTACCTTCTTCTCCTC  
 CTCTCTTCTTTTTCTTCTCTTCTCTTTTTCTTCTTCTTCTTCTTCTTCTTCTTCTTCTTCT  
 AAAAGGAAAACGTGTCGACCGAGACGCGGAGTCGAGGAGAGAGGACGTGGCCCGAGAGG  
 GCTTACTCGAACGAACACTCCCGGCTTTTCCAGGCCTCCTCTCCTTTCCCTCCTCGCTGCGCA  
 CGCTCTATCCGACTCCCTGTTCTGCTTCCCTCTCTCTCTCCCTCTCTCTCTCCCTCCACCC  
 GTTCTGTTCTACCCCTCGTTCCTTCTCCCTCTCTTCTTCCACCCTTTTCATATCCTCCTTTATCT  
 CGCCACTCTCCTCTCCTCTCCTCTTCCCTTTTCTGCCTCCTCCTCCTCCACCCTCAAACCGGC  
 ATCTTCTCGCCCTGCGTAGCGTCTACGCTTCTTCCACGTATTTTGCTTCCCTCGTTTTCTCGCG  
 AGCCAGCGTCCCGGGCGTTCTCAGCTTTTCCACCCCGGACGGCGCACGCGCCGCTGCATC  
 CACCCCGGGATTGTCCCCCTTCTCTCGCTTCGCTCCTCTCTGTCTCCTCCTCCTCCTCCTC  
 CGTTCACTCCGCGCAGCTTCCAAACGTGGGACGAGGATGTGTGTACGTGGATGAG

162. >MSTRG.3344.1 Gene=MSTRG.3344

AATCCTTAACACTACACTTCCTATTAGATTAACTAACGGCGCGTGTTAGCACGTATCTCTCTCT  
 AATGATTCTGTCCGATCATTTTTTCGCATTCTACCGCGCCATTTCTACCGAGTATCGCTATCCA  
 GAATCGATATCATCGATACTTTTCTACCGCTTACTATTTTTTTTTTCTTTTTTTTTTTTGTGAG  
 AAGCGATTTCATCAATGAATCGTTAGTTTCATCGATCGATGGACCATTTTCAATTTGCAATC  
 TCGTTCATTCTTCGTTTCGAACATAAACTTGCTGCCCCCTTTGTTATCTCGTGATGAATATTC  
 TTCCAGTTTTTCGTGACCCGTTAAGAAAAATGTTTCGAGCATTTTGAAATTTAAAAATCATT  
 CGTGCAAAATTTCTCATCGTTTTTACTTTTAATCAAGCTCGGATCTTCTCAATGGATCGCGA  
 ATTGTGAGCGTTGTCTTCCGACTTCTTCGCATTTCGGTTAACCTTCGAGTAACCTCATCCAGTA  
 AGCGTGGTCTTCAAGTTGGATCCAAAGTTTCGATCGAGGATCGTGGAAAGCAGTATCCTGT  
 AGCAGCTCCTCTTCGTTTTTTAACGATCTCTCGCGAAAAATTGGATATCTCGGAAGGTCAGAT  
 TTTTTTTTCGATCGGCGCTGCGATGGATTAAAAAGAAGAAGAAGAAGAAGAAAAAAATA  
 AAAGGAGGACAAATGGTGGGATCTTCGACGGATCCTGGATCCGTCCCTCCGTCTTGTCTG  
 AGCTACGAGTTTTTTGATTAATCGAAGACATCTCGGAGATCCTCGACGCCCCATCCGGACC  
 GCTCTCTGCCTTCTTTAGTCCTTCGTCGGTTCGAATGAGTTAGAGGTAGAGCGTGCTAACGC  
 GTCGGGGTGCCACCACGGTGACGGCCAGACGTGGTCCGCATTTGGTGGGGGGCAGCGGTG  
 CGGCGGTGGCCGGCGGGCGGGGTTTCCGGCCTCGCGCAGCCGAGGCCGCTTCCGCCGCGCA  
 GCTCCCACACTAAATTCGTCAACGAGCGCGGTCTGCTCAGACGCCTCGATCTTTTTCGGGC  
 AGCTTAGCACCAGCACCAGAGTCGCCCCGAGGTTCTGCCCCCGAGTGGCTCGAGTCGAGG  
 GTCCCGTCGAGCTCCATGGCCTGTTGCAGGTTTCGTCAAGCTCTTGTATCTGATGTTGAAAAG  
 GGGGGAGCCCCCTTGTACCCGGGCGGGGTCTCCTTCAGAGGGGACGCGCTTCTGTCTC  
 ATGAGGGGGCGCCCCCTCTGGGTGCCGCTGTTCTTACGTAAAGCTTGGCCAGGGGTGGCT

TCTCGGCCCTCGGCTGCGGCGCCTCCTTCACGGCGCGCCTCGTCCTCTTCTCGGCCTGGATCT  
TCTTGGTTCGGTATCGTCTCGATGGGCGGCGGTTCGGTCTGTCGTCGAGCAGTGGCGCGACG  
GTGACGGTGACGGGGGTGAGGGGCGGGCTGGACGACCCCGCCTGCGGCAGCGGGCTCTCG  
TAAGGGGACCTCACGCTCTTCGGCAGCGGGGCGAAACCCCGCACGTAGTCGTAAATCTGAT  
CGATCTCGTCGTA CTCTCGGTGCACGCCGAGGGCGGCACGCGATTCTCGTCCCTCGCGTAG  
CCGACGAGGGCGGCTGCTGCTGCTGCTGTTGCTGTTGCTGCTGCTGTTGCTGCTGCTGCTG  
CTGGCCGTTGCTGTGATAGTGGTGGTGGTGGTGGTGGTGGTGGTGGTGGTGGTGGTGGTGGT  
GGTGAGGAAGGGGCCCCGTTGTTGTCCGAGGTGGCGGCGGAGGACCGCCTCAGGAAACCCG  
ACCCGCCTCTCGTCTGCCTGGCCGCCTGCTTGCTCTCGCCAGCCGCCCGTCCAGCACGTGG  
GCCCCGTCCGCCACGTGCGCCACCAGCCGCGACGCCCCGCTCCACCAGCCTGCCGAACCTCCT  
GCATCGACCTCAGCGCCTCCTCGTTCCTCGCCTTGACCAGCTTGAGCGGCGCGGCCAGCGG  
CAGCGCCACCGCCGCCCTCTCGCTGCAACGGCAACGCGAACACGTGCTCCTCCTCGAAC  
GTGGACAGCAGCCTGAGCTCGGGCACGAACTGCGACGACGACTTCAACCCCTCGGCGGC  
TGCCCGTGACACGACCGCACCGTCAGCGGCAGACGCTTGCTGAGCAACGCGCGGGCCGTG  
TGCACGCCGTTATGTTGTCCTCGCGCGCCACCGCGCTGAAACGGCCCCGCTGATCCATCCC  
GAGCAGCACGCTCTCCCCCGACAGTCCACGCAACGGAGGAATCTGCCGCGGCCGGGCAG  
AGTCACCTCGCCCCGCGGTGACGATCGTCTCGCCCGCGGCCAGGGTCCTGGTCCCCTCCGGG  
ACCACCAGCCCCGACTCGTCTGTCACCTGACGCTATGCCGCGCACCGTCTCCCGCACCA  
GGGCGCCCTCCTCGGGGCAACGGCGGGACAGCTCGTTCACCGACTCTATCCCGCGCACCGC  
CCTCCCCTCCTCGCTCAGTATCTCGAAGTAGCCGGCGTACGAGTCGGGGATGGCGAGCCTC  
GGCCCCACCCCGACCACTCCTCCCCTCCTTGATCTTACCGCCTGGGCGACGATCTTGCG  
CCGCTGCCGGCCGACACGAGGAGGGCAGTGTCTGACGGCTGGGCGCCGGCAGGGTGGG  
CACCCCCAGCCCCCGTACTGGCCCTTCGTGATCTTGATCACCGCGGGCAGACGATACTTG  
GAGACGAACTCGCGGAGGTAGGTGCGCTCCTCGGCCACCGCGCCGCGCAACCACGATC  
TGACCGTCGGTCGCGGCCATCGCCGCGCTACAACGCCGCCTCTCTCGCGTCCGATCCCTCCG  
CCTCCGGCCGATAGGGTGCCGCTACTGCCGATCCGACGCCGCGCCTCTATGCTCCATTTGTT  
GCCTCTCCTCCCCCTGTGTGCCTCGATCCGACAATATTGGCGCGCTCTCCTCCTTTCGTGGCC  
GTGATCCTTTTCGATTTCTATCGCCTCCTGCTCCCACTGCCTCCGATCCAGAACGTGGTGAA  
CGACGGTCGCCGTGAGGCACGTCCGCTTGCAAATAATTTTGTGTTTCCCCACTGGTAATC  
CACTATGGCACTGTATTACTGTATGTGTACTATACGTATCTAACTTGTACAAGTGTACGTAG  
ATGTACCGGGCGTATGTTCCCGAGACCACGAAAAGGGGATGCGTACGCGAGCCGAGGCGA  
CAAATACGAGAAAATCGCGTGAAACCACCGTTTCGTATTTCAACGTGCGCCGGACGGAAA  
AATGTCGAGAAAAGACGAAATAGCCGGCGGAGAGAAAAGGAGAGTGACGACTGGCCCTG  
CTCTGACACAGATCACTGACCAATTCCGCTGGAGGACTGACGCGATACTGACTCGACATCG  
CATCTGGCGAGGAGCGCGACAACCGGC

163. >MSTRG.3344.2 Gene=MSTRG.3344

ATCGGCGCTGCGATGGATTAAAAAGAAGAAGAAGAAGAAAAAATAAAAGGAGG  
ACAAATGGTGGGATCTTCGACGGATCCTGGATCCGTCCCTCCGTCCTTGCTTGAGCTACGAG  
TTTTTTGATTAATCGAAGACATCTCGGAGATCCTCGACGCCCCATCCGGACCGCTCTTGCC  
TTCTTTAGTCCTTCGTTCGGTTCGAATGAGTTAGAGGTAGAGCGTGCTAACGCGTCGGGGTGC  
CACCACGGTGACGGCCAGACGTGGTCCGCATTTGGTGGGGGGCAGCGGTGCGGCGGTGGC  
CGGCGGCGGGGTTTCCGGCCTCGCGCAGCCGAGGCCGCTTCCGCGCGCAGCTCCCACACT

164. >MSTRG.3382.1 Gene=MSTRG.3382

CGGCAAAAATTAGTGGAGCTTGGTTGGGATGTTTCGCCACATCCACCGTATAGTCCTGACCT  
TGCACCATCCGATTACTTTTCGTTTCGATCTTTACAAAACCTCCTCGAATGGTAAAAATTTCA  
ATAACGATGATGATATCAAATCGTACTTGATTGAGTTTTTTGCTAATAAAAACTACAAGTTT  
TATGAATTATGCTGCCTGAAAGATGGCAAAAGGTCATTGATTTAGTTCCATGAAAAAATTG  
TCTTTGATTTTCTAAAAAAAATCCGCAATTACTTAATTCCCAACCCAATATATATAATCGGG  
AATAAGCGAGAGATAGAAAGAATCCTTGACAATATTTGATAAGTGACGTTGAAATGGAGG  
AGGAGAAAAAGAGATTATAACCACGCTCGAGGAACGAAATTATCGATGAACAAGCTCGTT  
GTAAGATAATATGAATCTCTAATATGAATCTGGATTATATAGTTTAACTTTTCACGTTTTAC  
GATACTCGTTCCTCGAGCGTGGTTCTTCTCTCTGGATTGATGATTTTCTCATCGAATCGAAA  
TAATAGAATAGGAAAAGAGAAAAATTTGTTAAAAATCTCAAGTAATTGGAATACGATCAG  
GGAAGAAAATTAAGCGCTGTTTGGGGATAAATTTTCTACGAAAAGAAAAAAGAAAAAAA  
AAAGACGATAGAATAGTGATTGTCAAAGTGTGCCTTCGATTACATATCATTGTATTGGA  
GTTTTATTTATCGTTGGTTTGAAGTTGATCGGCGAGGGTTAAAAGTAGCTGGTAAGCGTAAA  
ACCGGCGTTTCAATTTAGCGAGAATGTATCGATTAGAAGGGCGAGGGAACGGACGGCGGA  
GAGGAAAATTAGCGGAAAATTGAGCCCGTGGCATATCACGTGGGGTGATAATTCTCGCCTA  
GGACCAGACACTGTGCGTCGTTGTGTACATATAAAATGCGTTCAATTAGTTTTATCGGTCCT  
CGTTCGAAAGAAAGGGAGAAATTGATTAAGCGCTACTCCTAGTATATCAGAAATTTAAAA  
AACGTATCCGAGATTATGATGATTCGAGATCATTGAAATTTAAATCGAATCGAAAGTTGGA  
CTTTCTCTCGGTGAATCGTTTATCGATTGAAAAGGAGGCAGCCCGGCGCGAAATACAGT  
TGTACGCACACGACAGTGAGGAATAGAAGGGATGTCGTAAGGGTACGCTGATATATCTCCT  
CGAATTTTCAGAATTCATGGAAATTCATGTACCTTTATAGAATCCTCTGTATCTACCCGTAC  
GTAGGATATTCGATTTAAGGAAAATGAGAGAATAAATGTCGTACGTTGTATATTTGTCCC

165. >MSTRG.3453.2 Gene=MSTRG.3453

TACGGTAAATTTATACAAGAGAAGAATACGTTACGTCACGTTATTTTCAATGCCGTTGCTAG  
ATTAGACAGAGATACTACGCCATGTAACAAGGCTTCCATCGTTAAGTCAACGTTATATCGT  
AATTGTGTATGTAATATATATACTTCGAATTGTGTAGCAAATATTGGATAAATAACGAAATT  
TAATATATAATATATAAATATATATAAAATAAATAAATAAATTTTGCAAAATATGGCAAAA  
CAAATAAAAATGGTACTAATAGATCTTAGTGGTACTCTTCATATTGATAATACAGTGATTCC  
AGGTGCAGTGGAAGCTTTAAACAGCTTCGAAATGCTAATATACCATATAAATTTGTCACAA  
ATACAAGTAAAGAATCTAGCAACTTACTATATAATCGATTAAACAAAATTAGGTTTTACTGTT  
AAAAAGGAAGAAATTTTTAGTAGTTTAATTGCAACAAGAAAACCTGATCATTTGAAAAAAT  
TAAATCCAATGTTATTGATTGATCCTCATGCTAATGAAGATTTTGAAGATTTGGTAAAAACA  
AATGAAACAATGAATGCTGTAGTAATTGGATTGGCACCGGATAAATTTTATTACGAAGAAT  
TGACAAAAGCATTGAGGTTATTATTAGATGGTGCATCTCTCATAGCAATTCAAAAAGCTCG  
ATATTATAAAAGATCAGATGGTTTAGCTTTAGGACCAGGGGCATTTGTTGCTGGTTTAGAAT  
ATTCTGCTAATGTGAAAGCAGAAGTCATTGGAAAACCTACTGCAGAGTTTTTTAAAGCTGCT  
TTAGGAAACATATCTCCCGAAGAAGCAATTATGATCGGCGATGATGTTAAAGATGATGTAG  
CTGGTGGCCAAGCTATCGGTATAAGAGGAATTCTAGTACAACTGGAAAATATCGAGATGG  
AGATGAAAATACAATTACACCACTGCCTACAAAA

166. >MSTRG.3457.9 Gene=MSTRG.3457

GTCGGATCTCGAGCCGTGCAGGTCGTTTAAAGAGTTTTTGTAGTTTTCGTTTCGATTACCGAGA  
CGCGTGCTACAAACCGCGTGGTTATCACGTTATCAATCAAAGTTTCTGGTGTGTTTCGTTCA  
GTGCTGTTTCATGTTATTTTTCATCGTCGTTGTGTGAACGTTCCATTGAATTTTTCGACAGGCA  
ACAAACAGTGGTTGCAATTTTGGGGTGTACAACGTGACAGACAGGAAGATCGTTGGATAA  
CCAGACTACCGACGCCACCAGCACGGTGATCCTCGTAATCTTATCAGCCATCGGTCGAGCA  
ACGCGCCAGATCCTCGAGCTGCATCGTGACTCTTCTCCCCCTCCCCCCTTCTTGGACCGAAG  
GCCAAGTTACACGCCGGATACATCGCGAGGCAATTAAGGAGATTACGGGAAACGCAGAT  
GGAAATTGGAAGGGTATCGAGGTTGGCCGGCGTCGTTCTGGCCCTTATCTCGATCACGACC  
ACGTGGTCCCGGCATGGTTGCTGCGTCGCGGAACTTTACACCGCGTTAGCGGACATGGAGG  
AGCTGCTGGAGACGGAGGCGGTGCTCATCGACACTCTGAACGGGTACATCAAGGCGCAGG  
AGGAACGTCTCGCCACTCTGAGAAAAATCTATCGATCAACGAATCCGTTACGATTCTTCAC  
GCGTCGCTCTTGTCGAATAATTAATGAATAAGGATGCGATATTCGTCCAAAACGTTTATTTT  
CTACGAGAAGTGATAGCGAGAAAAATGTCGAGG

167. >MSTRG.3461.1 Gene=MSTRG.3461

GTGATAGTAATCACGATTGTGATAAGATTGTCTCCCAAGTTCGAAACAGTCGCTGGCGGTT  
AATCCTGTGCTGTATTGGACCCCGTTCAACACGCCCTGGCGACCTGTGCAGTCTCGAGTTT  
GTACGTGTCTGTAAACCTCATCAAAGCGACGGCCGCCCATTAAGATCCTCGTCAGTTGGG  
AATTTAAGGTCGCTCCTCGAGCTGGTTATATTCGCCACGAAAGACTTGCCACGTCCTGGGT  
GATCAGCTCCTCGACCCGTTTCCAATCCGTGGTC  
AGCCGTTTCACCAATAGATAAGCGTTGATCGGATTTCGACAGGTACTGCTGAATGTTTCTCGA  
CGCTCCTCGTGCTCTCTCGCGTAATCCTCCACGTTTTTTCTCAGAGTGGCGAGACGTTCCCTC  
CTGCGCCTTGATGTACCCGTTTCAGAGTGTGATGAGCACCGCCTCCGTCTCCAGCAGCTCCT  
CCATGTCCGCTAACGCGGTGTAAAGTTCCGCGACGCAGCAACCATGCCGGGACCACGTGGT  
CGTGATCGAGATAAGGGCCAGAACGACGCCGGCCAACCTCGATACCTTCCAATTTCCATC  
TGCGTTTCCCGTGAATCTCCTTAATTGCCTCGCGATGTATCCGGCGTGTAACCTTGGCCTTCGG  
TCCAAGAAGGGGGGGAGGGGAGAAGAGTCACGATGCAGCTCGAGGATCTGGCGCGTTGCT  
CGACCGATGGCTGATAAGATTACGAGGATCACCGTGCTGGTGGCGTCGGTAGTCTGGTTAT  
CCAACGATCTTCTGTCTGTACGTTGTACACCCCAAAAATTGCAACCACTGTTTGTGTCCT  
GTCGAAAAATTCAATGGAACGTTACACAAACGACGATGAAAAATAACATGAAACAGCACT  
GAACGAAACACACCAGAACTTTGATTGATAACGTGATAACCACGCGGTTTGTAGCACGC  
GTCTCGGTAATCGAACGCAAACTACAAAACTCTTAACGACCTGCACGGCTCGAGATCCG

168. >MSTRG.3471.1 Gene=MSTRG.3471

AACTTATACAAGTACGTGGCTTTATGACTATTTTCCTTTTGCTGACCGCAAAGTAGAGGTGG  
TAAACGATAAAGGTAATAACATAGAGGTTGACAAGTAGGTAAAGAAGGAAAGAAAATAT  
TAAAGATTTAAAGGCTAAACTCTTATCTTACATCAGTTAGACGTGTTTTATCTTCGAATTG  
AATCTTATTCAGAGGAAGAACATATTGTGAAACAGGATCTTGAATAAACAAAAATGTATA  
AGAAAGGAACAATTCTCGTGTTAGCGTATTTATTAATTGCCACAGCAGTCTGTCAACTATCT  
TATAAAGAAGGTCATTGTCCATTAAGAAATAGTGTTTCAAATGCATTCCTAGATGTGTTTC  
CGATTACCAATGTTCTTTTAATGAAAAATGTTGTCCAAATAAATGTGGAAGTGAATCTTGTG  
TTCAAGCAAGTCCTATTAATACTGGCAATGGATATAAAGGATCGAACGATGATGTTTATTG  
CGCTGGAGTAAAATGTGGGCCATATGAAAAATGTCAATTTGATCGTAAAACAAAACGAGA

GAAATGTGTTTCGTACATAGATGATTTATTTAAATGTAATAATAATATTATATTAATAATATTT  
TTTTTATAAAATAAATAATTTCTTTTTTGTTTTAATCAATTTATTTTGTATATAAATTTATTTCT  
CAATAATAGAGAAATTTCAAATTCAAATTGCGATTAAGAGCGATTAAATCGAGTTACGACC  
AGTAGCGATAGAAAATCTGTTGAAATAAGTCGACAATCGACATACAGATTTTAATCGATAT  
TTTTCGATAACCTTTTTATTGTTTCATAAGGAGTGCATGCCGAACGAAGTACTACTTGTTTGT  
TATTAATATTTATAAAATAAGTACAATATAAGATAATTACATCGTTCTAAAAATTTTCAAT  
AAGATGGCATTGATCAATCTTAAATTATCACAATATATAAAATCATTTCATTACACATTTT  
CTTAATATTATATAAAAGAGGTTAGGCTTTATGCCGATATAATACAATGGCAATAGAATTTT  
TAGTAAATCGATTCAAAGCACTCGTTGTATTTCTTTTGGGAGTATTTGGCGAGCAATGTGTT  
GTTTTCGACGTCGAAGAAGATCATCCTGTGATTCTATCCCTTATCTGCTATTGGCGTAGTAC  
CGAACACCTTGAACATAACACAACCATAATTACTGAAGATGCTTGCTCAAGGAATTAGAGC  
ACTGGGATCAATGGGAGGAAAATCCTGTCTGATCGTGCCAGATAGGCCAGTTGACACAAT  
ACAAGCAAAGATTGAACAATATAGACAGCAAGCATCTAAACCACCAGAATCTACGGAAG  
AGCAACAACCAGATTTTTTTGAGAATATGACACCAAAGATCACTACACAGACAAAAATTTT  
AATTAAGATAAAAGCTTAGAGAACACATCCTGGAATTCAACAAAATTTGCTGTGATCAAT  
GATCCTATACCATCTAATGAATTAGGAGAATGGGAAGACAATGCTGTTGGCTGGGAGGAA  
GAAACAACAAAAGAATTTGGAG

169. >MSTRG.3480.1 Gene=MSTRG.3480

CCCTTCCTGTTCCGCTCCACTCCGCCACTGGTCCGTCCCAAAGCCAACGAATACCCGTCGAC  
GCCGAAAGTGCTTCACTGGCATCGACTATGAGCCTGGTCATCGTCCTCCGTTTGTCTATTAT  
GGACGCACGCGTGTGTTTCGAGCATTTTCGTCAACTCGATTCGCGTCAGAGGAAGTTGTTG  
ATTGAACTATTTTCTCACGATCATCGTCGAGCGAAGGCCAAAAGTGTGGCCGGAGGATTGTA  
AATCGCTAATCGACCTTCTGCTTATTAATTGCACCGATTATTCCGTACAGAACTTTTTTTTTCT  
CCCTTAACTTCTTACTCTTTGATCGTAAAC

170. >MSTRG.3501.1 Gene=MSTRG.3501

CTCGTCGAGAATGGCCATCGTAAACAGGAATATGGATATAATAATCTCCGCGTATATTTTT  
CGCATCGGCAATCCCGACCGAATATTTTTCAATTCCCTCCGGACACAGAATTTTCCGCTCTA  
ACACTAACTAAATTACAATTCTTCTCTTCTTCTCGTCCTCCTACTTTGCAAGTAGACGTCCTC  
GTTCTCTCGTTCCTTCGACCTCTTCCCATCAATTCTCTTCATTCTCGATCGTTCGAACACAGGA  
CGCGATCCCATCGTGCATTTTCGCTTCCGGCTATTCAACACCGAGCCACTGAGAGCTAGCTA  
CTGAGCAACACTCTGGTTTCTTCTCTCTATGCGTGGAACGATCATCATCATCATCCTCC  
TCTGGGAAAAAATATCTTCGTCTGATGCTCGATCGTCCAAAAATGGATCACTCTCTCTCTC  
TCTCACTCTCTCTCTTTCTCTCAAACCTGGAATAAAAAAACACAGTCTTGATTGTTTCGT  
TCGTTTCGCTCGCTCGATCGATCGAACAGATCGACCGATCGATCGGCACGCATTCGATATTTT  
TTCCGAGTCACGAACAACGAAACAGATTAATCCCCCGTTATATATATATATATATATATATA  
TAGTTTCCCGGACAGTTTTGCTCGCTTTGTCCCGGTCAGGCGGCACAGATATACAACTATA  
AAGCAGATTTTCGTAAGATTCGGAATCGGATCGATCCATCCCTCGTGTGAGTAGGATCATC  
CTATTCCCCGACGCGGGCACTAAAAATCGCTCTCTCTCTCTCTTGTCTCTCTCTCTCGCTCTCT  
CGCTCTCTCTCTCTCTACGTGTTATCCTAGTAGATCGCGGCTACGAATCGTTCCTTCTTTCC  
ACGTCCACGCTCCGCAACTTAAGCGATCAACAACGGTGCACAACAGCCAATCGCCATCGA  
AACGATGGACGAAAGCAGGATGATGCTCGATCCAGCGCCGGCCGTCACCGGATTCTCGTG

ATTCGTCTTCAGCATTGGATCAGGTGTGGTGGGTCCCATTCGGATCCAGACGCCTCCTCGT  
 CGTCGTGGTCGTAACCGTGACGTCCTCGTCGTCGTTATCTATATCCTCGTCTTTGTTTTCTT  
 ATTCCATATAGGCCGGTGCCTGCTACCGAGCAACGTT  
 CCGCTGTCGGGCGCAGACGCCAACTGAGACTGCAATATCTGATTAATGTGCCTCAATTGGT  
 CAATGAGCACGCTGGTGTTCGCGTTGCCGTAGGAAGCCGTCGTCGGCGACATCGTCGTCAC  
 GGTGAACTCCGGGTGTACCTCTGCGCCGTCAAACCTCGAGTCCGCCACTGTCTTCGTGTACT  
 CCCCCACTCGTTTCGCCGTTCCAGCACCGTTTGTCCGGATACTCCTCGCAGATCGTGTGGCC  
 AGGGTGCCGTAGAAGGTGCGAGACCTGACCACGCTTGCCAGGAAATTGCCGAGCTGCACG  
 TGCAACTGGGACGGCAAGGTCCGGCTGGGCGGCGCAGCGGCAGCTGCGTGCATCTCGATC  
 CCGCCCCGACGACGAGGACGAGGACGACGATTTCCCCGTCCACCGGCTGCGTCCGCGACG  
 CTCCTCTCGCTCGACGGCGATGGCTCCAGCTCCGAGCGGCCGCACACCTTCCTCACCTTTTC  
 CTCGAGCGCCGGTCCGTCCGTCAATTGCGTGCATAATGGCGTCCGAAATGCGGGTGTCCAAT  
 TGTCTGACAGCCCTCTCGGCATTCAGGCCCAACGGATCGTTACGACCGTCGACCGCCACCA  
 CGAGCCTCTCCACTGTTTCCACGTAACCGGACCAAGCCAGGTCCAGCTCGGATGCTGGCTG  
 CGTCAGGCAACCTCTCATGACATTGGTGCAGAATCCACTGCAGGGCCTGACGGAGGGACC  
 GATGCCCTTGACCTTGACAATAGGTCATCCTGAGGAGGGCGGCGTAGCAGGCCTCCTGC  
 TGGGGGCTTGTGCCGGAGAACAGCACGCTGTCCGTCCTGTCCAGCACCGTTTTGCCGAGTG  
 TCAACGCCTGGACCAGGACCCGGGTGCGCTCCAGGCTTTTCGAGACCGATTTTCGCGACCTG  
 GACCGGTATGTCGCCGAACGGTTGGATCTGTTCCATCGTCTCGTACAGGCACGTCTTGAAC  
 TCTCCGTGAAATCTTGCTCGTATTGGCGGGGATTACGGCGCCGTGATACGCGATCGGGAA  
 CAATTTGGCGAAGAACTCGATGAACCTTTCTTGAAGCATGTCCCGCGTCAACGGTTGCTGC  
 AAATGTCCGGCGTGTGCTCGGTGACACGTAATCGACCATCGCCTGGTACAGGGCTTTTAT  
 CGAGGGCCTGCTCGATACCGCCATCGTCCGATACACTTGATCGAACAGTGTTAAAGTTTTGT  
 TCTCCGACTGTCTCGCGAGCATCGTCACCGTTTCCCTTAACGCGTCCGCCGTTGTAGCCAAA  
 AGGCCTTGCAAACCTTGCTGTGATGATGGATCAAGTCGTGGAAATCTGCCCTGGCTTGATG  
 TCTTAACCTGTTCTTCGGTGTCCCGGTGCGAGCACATGCCGTTACAAGTTGTTTTGCGATGTC  
 TTCTGCTGTAGCTTGCTTCCTATCAACCAAGATCGTGATATTCTTGCTCTCGAAAAACGGCTT  
 AACACGTTCAATCAACGGACACGAAATCGCTATCATTTTTTCGGATGTTTCGGCAAAACGT  
 GCGATCGAGATGACACGAGATCGGTACAACCGCATAATAATATCACGATCGATACAGGT  
 GCCAGAATCGCACGACGATACCTCTGAATTATTTTCATTTTGGCAAAATGGCCAAATCGGC  
 GAGATGAATCGGTAAAGAAAAGCAAAAGCGAAAGAAAGAGAAACCGGGAGCGGAAACT  
 GTGCGAAAAAGATTGGTGGTAAGTTCCGTAAATCGTGCTCTGAAGCGCAAGAAGAACAGA  
 GAGAAAGAGACGCAGCACGAGCAACGAGACGATTCAATTCCTCTTTCTCCTCCTTCGTTGT  
 CGCGTATTCGGTACGATCGTTCGAAGAGTCATCAACCGCGGGACTAGACGCGGCTTCCTTC  
 CCTTTCTCTTCGTTCTTCGAATCGGCCGCGCTGTCAAACGGCACAGCAACAACCACGGGT  
 GTTACTGCAAGATCTCGAGAAGCGCGAGACGTGCATTTGGCGTGATCGCGATGGACGGAC  
 AGACGAGACGATGGCTATAGTAATCACGACATGCACTGTGAGACCGCGCAACACCGTGT  
 TATGACCCGCACACATGCACACGCGACCACTCCGGGTACACCACAATAATAAGCACACAC  
 ATGCACGCACGTTTAACCGCACGCAAGCATGCATGCATGCACAACACGACACGCGTTCCA  
 CGAGTAGCTCGATGCGACTGAAGTGCCGAGAGCGGCACCGCGTATTACAAATT

171. >MSTRG.3503.1 Gene=MSTRG.3503



CCACGAGGAGGTTGCTGCAAATGGTGACTCACCTAACTCCACGGGGCCCATCCACCCTTC  
CTTTGCAAATTTTAAACTGCGGTAGACATCATCGCAGTACATCAACCGTTCATTCCAATTGG  
AACAGACGGAAGAGAAAAAAATGGACCTACCCGAAAAAGAGCTAGACGTGCTAATCATC  
GCCTATGGTCTTTTGAAGCTAAACACCCTTCACCAATTCCTAGCTAAACTTATAAACTAAG  
CTAAGCCCTAGCTAAATTAGATTTCTGATAGGCAGGATTTATAAACCGTACAATCGTTTGAT  
TTATATGTTATTAATGGCATACTTCTTAATAAAAAGAAGGGCCTATGAAAAACGGAACGGT  
ATTAATAAAAAAAACAATGCAATTCTACTATTCTAAAACGTGCTCATTGTGTAACATTG  
CATGTCTCGTCCAATACGTCTGCACGAGGATAAATGGAATTCCTCTACTCCCGTCATCACGA  
TCATAGAGGAAGGTATAACGAAACAGAATATAAACATTTAAGTTACTATTCCATTTACGCA  
TTGCGAATATTGCAGACGAAACAAAGCTTCGAAACTGCGTTTCTTTGCGATGCAAAGAAAC  
TATGTTTCTTTTGCTTCCGTTGACATCTACAATCGCAAAAGAATCCTAATGGGTTACAAATTT  
TACGCGTGTGATCTCCTTTAACCAGAAAAAAGGTACTTAAGGAAACGACAGAATCACCGA  
ATCTATCAAATCACCGTGTAATGGGTCTTGTAAGAGACATGCACGTAACGGGCATCCTC  
TAATTCAAAAAATCAGATTATTCCTCAACGCAGCATAAATTATATCTTCTTGATCGTAAA  
GCTTTAGAAAAAGATACAAAAATCTTGTTGCAATCGACTATGTCAATAGAACATGAAATTG  
GTAGCTATTTCCATTTAACTTTACTTTCATTAAGTATATAATTTTCATCTTACAGACGTAGAC  
AGAAGGAAAGAAAAAAGGGAAAGGGGACTTACGATTGTCCGAGATTACAAAGAAACCAA  
ACTGCACCACGCGGAAGACGCGGAAGATCTGAAAAACACTAACATATGAAACCAAACGA  
TTACACAACAGTCTAGCTTGAACGTTGCGGAGTGAAGTTCTCTTCTCGTTTTGTTCTTAATG  
AACTTTCAATTTTATTCTAAATTTGATCTTGTAATCCATGTTTTTCATCATCTTTCCATTTCTC  
AAAATTTTACTTTAATTCGTAATATCATGTTCAAGCTAGACTGTTGTGTAATCGTTTGGTTTC  
ATATGTTAGTGTTTTTCAGATCTTCCGCGTCTTCCGCGTGGTGCAGTTTGGTTTCTTTGTAATC  
TCGGACAATCGTAAGTCCCCTTTCCCTTTTTCTTTCTTCTGTCTACGTCTGTAAGATGAAA  
ATTATATACTTAATGAAAGTAAAGTTAAATGGAAATAGCTACCAATTCATGTTCTATTGAC  
ATAGTCGATTGCAACAAGATTTTTGTATCTTTTTCTAAAGCTTTACGATCAAGAAGATATAA  
TTTATGCTGCGTTTGGGAATAATCTGATTTTTTTGAATTAGAGGATGCCCGTTACGTGCATGT  
CTCTTACAAGACCCATTTTACACGGTGATTTGATAGATTCCGGTGATTCTGTGCTTCCTTAAG  
TACCTTTTTTCTGGTTAAAGGAGATCACACGCGTAAAATTTGTAACCCATCAGGATTCTTTT  
GCGACTGTAGATGTGAACGGAAGCAAAAGAAACATAGTTTCTCTGCATCGCAAAGAAACG  
CAGTTTCGAAGCTTTGTTTTATCTGCAATATTCGCAATACATAAATAGAATAGTAACTTAAA  
TGTTTATATTCTATTTTATTATACCTTCCTCTATGATCGTGATGACGGGAGTAGAGGAATTCC  
ATTTATCCTCGTGACGACGTATTGGACGAGACATGCAATGTTACCAAATGAGCATGTTTTAG  
GATTATAGGATTGTGTTGTTTTCTTTAGCTAATACCGTTCCGTTTTTACAGGCCCTTCTTTT  
ATTAAGAAGTATGCCATCTAATAACATATAAATCAAACGATTGTACGGTTTATAAATCCTG  
CCTATCAGAAATCTAATTTAGCTAGGGCTTAGCTTAGTTTATAAGTTTAGCTAGGGATTGGT  
GAAGGGTGTTTTAGCTTCAAAAGACCATAGGCGATGATTAGCACGTCTAGCTCTTTTTCGGG  
TAGGTCCATTTTTTCTTCTCCGTCTGTTCCAATTGGAATGAACGGTTGATGTACTGCGATGA  
TGTCTACCGCAGTTTAAAATTTGCAAAGGAAGGGTGGATGGGCCCCGTGGAGTTAGGGCGA  
GTCACCATTTGCAGCAACCTCCTCGTGGTGTGACTTGGGAAATTTGTAT

172. >MSTRG.3504.1 Gene=MSTRG.3504

GCCCTAACTCCACGGGGCCCATCCACCCTTCCTTTGCAAATTTTAAACTGCGGTAGACATCA  
TCGCAGTACATCAACCGTTCATTCCAATTGGAACAGACGGAAGAGAAAAAAATGGACCTA

CCCGAAAAAGAGCTAGACGTGCTAATCATCGCCTATGGTCTTTTGAAGCTAAAACACCCTT  
 CACCAATCCCTAGCTAAACTTATAAACTAAGCTAAGCCCTAGCTAAATTAGATTTCTGATA  
 GGCAGGATTTATAAACCGTACAATCGTTTGATTTATATGTTATTAGATGGCATACTTCTTAAT  
 AAAAGAAGGGCCTGTGAAAAACGGAACGGTATTAGCTAAAAGAAAAACAACAATCCTA  
 TAATCCTAAAACATGCTCATTGTTGGTAACATTGCATGTCTCGTCCAATACGTCGTCACGAGGA  
 TAAATGGAATTCTCTACTCCCGTCATCACGATCATAGAGGAAGGTATAATGAAATAGAAT  
 ATAAACATTTAAGTTACTATTCTATTTATGTATTGCGAATATTGCAGATAAAACAAAGCTTC  
 GAAACTGCGTTTCTTTGCGATGCAGAGAACTATGTTTCTTTTGCTTCCGTTACATCTACAG  
 TCGCAAAAGAATCCTGATGGGTACAAAATTTACGCGTGTGATCTCCTTTAACCAGAAAAA  
 AGGTACTTAAGGAAACGACAGAATCACCGAATCTATCAAATCACCGTGTAAAATGGGTCTT  
 GTAAGAGACATGCACGTAACGGGCATCCTCTAATTCAAAAAAATCAGATTATTCCCAAACG  
 CAGCATAAATTATATCTTCTTGATCGTAAAGCTTTAGAAAAAGATACAAAAATCTTGTTCTGA  
 ATCGACTATGTCAATAGAACATGAAATTGGTAGCTATTTCATTAACTTTACTTTTATTAA  
 GTATATAATTTTCATCTTACAGACGTAGACAGAAGGAAAGAAAAAAGGGAAAGGGGACTT  
 ACGATTGTCCGAGATTACAAAGAAACCAAACCTGCACCACGCGGAAGACGCGGAAGATCTG  
 AAAAACACTAACATATGAAACCAAACGATTACACAACAGTCTAGCTTGAACGTTTCGCGGA  
 GTGAAGTTCTCTTCTCGTTTTGTTCTTAATGAACCTTTCAATTTTATTCTAAATTCGATCTTGT  
 AATCCATGTTTTTCATCATTCTTTCCATTCTCAAAATTTTACTTTAATTCGTAATATCATGTTC  
 AAGCTAGACTGTTGTGTAATCGTTTGGTTTCATATGTTAGTGTTCAGATCTCCGCGTCTT  
 CCGCGTGGTGCAGTTTGGTTTCTTTGTAATCTCGGACAATCGTAAGTCCCCTTTCCCTTTTTTC  
 TTTCTTCTGTCTACGTCTGTAAGATGAAAATTATATACTTAATGAAAGTAAAGTTAAATGG  
 AAATAGCTACCAATTTTCATGTTCTATTGACATAGTCGATTCTGAACAAGATTTTTGTATCTTT  
 TCTAAAGCTTTACGATCAAGAAGATATAATTTATGCTGCGTTTGGGAATAATCTGATTTTTTT  
 GAATTAGAGGATGCCCCGTTACGTGCATGTCTCTTACAAGACCCATTTTACACGGTGATTTGA  
 TAGATTCGGTGATTCTGTCGTTTCCTTAAGTACCTTTTTTCTGGTTAAAGGAGATCACACGCG  
 TAAAATTTGTAACCCATTAGGATTCTTTTGCAGATTGTAGATGTCAACGGAAGCAAAAGAAA  
 CATAGTTTCTTTGCATCGCAAAGAAACGCAGTTTCGAAGCTTTGTTTCGTCTGCAATATTCG  
 CAATGCGTAAATGGAATAGTAACTTAAATGTTTATATTCTGTTTCGTTATACCTTCCTCTATG  
 ATCGTGATGACGGGAGTAGAGGAATTCCATTATCCTCGTGACGACGTATTGGACGAGACA  
 TGCAATGTTACCAAATGAGCACGTTTTAGAATAGTAGAATTGCATTGTTTTTTTTTAGTTAAT  
 ACCGTTCCGTTTTTCATAGGCCCTTCTTTTATTAAGAAGTATGCCATTAAATAACATATAAAT  
 CAAACGATTGTACGTTTATAAATCCTGCCTATCAGAAATCTAATTTAGCTAGGGCTTAGCT  
 TAGTTTATAAGTTTAGCTAGGAATTGGTGAAGGGTGTTTTAGCTTCAAAAGACCATAGGCG  
 ATGATTAGCACGTCTAGCTCTTTTTCGGGTAGGTCCATTTTTTCTCTTCCGTCTGTTCCAATT  
 GGAATGAACGGTTGATGTACTGCGATGATGTCTACCGCAGTTTAAAATTTGCAAAGGAAGG  
 GTGGATGGGCCCCGTGGA

173. >MSTRG.3525.1 Gene=MSTRG.3525

ATCCGTGGCGCCGCCATACGCAATGAACAACATTTGTGAAGCACCAAACCCTCCTCTCTTTT  
 CCCTTCTTTTCTCTTAGCCTAGCAAACACTTTAACGTGTGTGTTTCTACGCTTCGTGCAAAT  
 GTATGTGTGTCATCGCTATATAGTTTATGAAACGTCTTCTTTATCGAGTGTGCGAATCGTTTT  
 TGGGTTCGAATGGCAGTGACTATTGGCCCAGGATTCTCTTTATTTACACTCAAAAAGTGGT  
 GTAATCATAAATCCGTCATCAATGACGTTAAAGAAATTAAGCTATAAAATAAATGCTTGC

AAAGCAAGCTGAAAAAGAAACAATTATAAATACTTGACCAAAACGGTCAGGTAAAAAA  
AAAAAAAAAAAAAAAAAAAAAAAAAAAAA

174. >MSTRG.3536.1 Gene=MSTRG.3536

TCACGGTTTTACATTCTTTTAATATATATGTATTTTTATTATATACGTATATTAGAATTAATT  
AGCGCCGTTAATTCAACTCGATTCTTTTTCTTTGAATCGCTATCGGATTTGTCTTCGGAAGT  
TCCATTTGTCAATTCTGGTCTTTCTTCTCTCCTTCCTCAGATTCGACGCTCGAAGCTTTTT  
TCTCTTGACTTTCTTGGCTAGCTGCCTTCTTGTCCTTCGTCTTCCTTTAGCAGGAGTTGCTGG  
CTTCGGTTTTGGCTCAAGACTCGGATCCAATACAATTTTACCGATGTTTTTACGGTCGTGCAT  
CTTCTGCATAGCCTCCGGGACGTCTTCCAAAGCCCATGTCGAGTCCACCACAGGCTTTATTT  
TACCCTCGTTCCATAAAGCGAATACCCGTTCCACTGCTCGTCTCACAAATGCATGACTTCCA  
TGCTGATACATCAAATGACGCAAATTCAACCCAGACAAGGTTTTATTCTCGTCGAACAGTTT  
AATGGGAGATACTTTGTCCACTTGCCACCATGATCGTGCTGCTGAGAAGAAGCTCTTAGTTT  
CGCCAGTGACAACATTACTAGATCCATAAAGAATATATTTTCCCATAGGTTTTAGCAAAGC  
ATATCCTTTGTTGCATTCTTCACCACAAAGGCAATCCAAGACGATATCCACACCTTCTGGTG  
AGATCTTTCTGACTTCGTTGCTATAGTCCGCGCCTCGTTCCAAGATGTGATCAATGGTGCCA  
GTTGCTTTCAATGCTTCGTGCTTCGATTTGCTGCACACTCCAAAAATGGTTACATCCTTCACA  
GTTTTGGCCAATTGGACGACTGCCTGACCCACACCCCCGCGGCGCTGTGGAGTAACAGAT  
TCTTTCCGGGCGTTAAATTAGCCAGTTCGAACAACAGAATGTAAGCAACAGTATAGTTCAT  
CGTGATCGCCGCTGCATCGAGGTAGCTCATTCCGGCTGGTAGCGCGAAAACGGACGTGGCT  
GGTACAGCGACAAGCTCTGCCACGCCTTGTGATCAGGAAGCGCGACCACTCGATCGCCCA  
CTTTAAAGTTCTCCACGCCCTCGCCGACTTGCTCGATATCACCTGCGCACTCGGATCCCAT  
ATGAAAGGAGTTTTTGGTGGGGAATCAATAGCACCTGCCTCGCCATCAAATCTTGAAAT  
TTAGTCCACATGCTTTGACTCGGATAAGAACTTCTCCTTCGGAGAGGGTGGGCTCAGGCTTC  
CTCAAAGCCTTGACACTTTTCAGTCCGCCGAAACCGTTCAGTACTATAGCCCGCATATCCTT  
TGGTCTGGCGTGGGTTTCTCTTCGCCATTCTCCTTGGGTTTATCACCGTCGCCATTCTCTTCG  
ACTTTCTTTTCTTCTTTATTTTCTTTTGGCTCTTCTTTTCTTGCTTCGACGGCGCGCTTCC  
TGTGGTGGCTTTTACCCTCGGCACTTGGGCTGGTTTCATTTTGTCTTCTGCCATTTTCTTTT  
TTATT

175. >MSTRG.3551.2 Gene=MSTRG.3551

ATTATAAATAAAATAAATTATTTAAATATTTTTAATTTATATATTTATATTCCTAATTTTATT  
TTTTAATTATTATAAAAAATTTATATTAATACTTTATTTTATTCACCATGGTGACGAATATAG  
CGAGGTTATATTGATCTTCTCTAAAAGATGTTTATTTGTAGTTATTAGGATAGTGTAATAA  
GAGAATCGAATTTAAATTTCAAAAAATGTATATATGATAAATTTCTTATGATAAAAAATAAA  
TTAATAATTTTTTTTATAAATTATTATTTTTTATTTCTGATTTTTATATCTATCTTCTAATATATT  
GTAAATTTTCATCGTAAATTTATAGGCAATGACAGAACATAAAGGTACATCTTTTTACAATT  
CTTGTGTGAAAGTTTCTGTAAATCCCTGTAATAGGCAACCAACTCCTTCTTATGAACGTCTT  
GAATTTAAAAAGAATAAAGAAG

176. >MSTRG.3555.6 Gene=MSTRG.3555

GACATTTCTGAGTCGTCTTCGAACGGACAAGGCTGTATCTTGCTCGGTGATTTATAGTCTT  
GTGTGTAGTTGTGCAACTTTCTTCCATTGTTCTACAAGAAACACGAGCCAGATACAGTCTCA  
CCGTTTGAGATGGCATTGGAACGGACGGAGGAACTTGCTGTTTGCAGCGATGCTGGGCGTA

CCGCAGAATTGGGGACCCCATGTTCTAGTCTCTACACCTTTCATTGGTTTGAAGTATGGCGG  
TTTACGTAAAAAATGTGTACTTATATAGCTTAAAGAAAATTTGTATAGTCAATTTAACCTT  
TATAGATTTAAATAGCGTTTTAAATGTTTACTTAATGATCGAAGAATAATTTTATATGTAGAT  
TTTGTACTTACTTATAAATGTTAATTAACAGTTTTGTAAATATTGTGATACAGCAAAACAGC  
AGCGGAAAAAATAAAAAAGAATGATAAAAATTAATAATGTTAATAATTTTCCTATGATTTT  
TAAATCGCCATATTAATGCCAAAAATCCTTTTCAGTCCAGCATACTACATAAAATTCTGTCTG  
AACGCAAGAGTGTCCCGCACGTGTGTCCAGGCTGTTGGTCGTCATCGGCGACACTATTTGG  
CCTGTCTATATATGAGATAAGGAATGGTGAGAGGATTGGTATGGGATGAACAAAGGGGCA  
AAATCTTTGTTTTTAGAAATTTGCACACCACGATCAAGTCGTACATAAACGTCTTCTCATGTT  
CGCGCTTCCGTATCTTGAACATCTGAGCATCGACTAATTCAAAAATCAATGTGATGCGTGAT  
ATACATAGGCTTACTGTGACATACTGCAGCAACCTCGAGCAAGTTCTATTTTGGTGAGCTAA  
TCCCTTCTGTTTCGTTACCTGTGCAAATATATTTTCTCAGGTCCAGAAAAATTTTCCAATGTT  
TATGCAACCGAGTTCTATATATGGGTTTCCCTGGCTTATTAATAAATCCTGTTCAAAGTTGAT  
CAAGCTGGATACTAGACATCATATATATTGTCCCATTTGAATTAATAATGTATAAAAGCTTCA  
AGGTATGGAGTAAATTAATGCATCTTTGTTGAATTTAGATGATCCAGTAAGGCGAGTTACT  
GCAAGTAGCACAATAATTTTAATAATAGGCATGCATATAAAATATAAACAGCTCAATTTG  
AATAGGAAATTGCTACAAATTTTTTACTATATTAAATATATTTTTTTGGGAATCATTACTAGA  
TACTTACTTTTACAGATTTTGATATTACTTCGCTTACTCATTGGGTCTAGAGCAAGAAGA  
ACTTAATGTATCATTAGATTAACAAAAAAATTCCTGATAAGTGATGTGCAACAGGGTTAT  
GGAAGTAAAGAGACCGATTTAATATTACAGTTTAATTGATTTGAGAAATACATTGAGAATT  
AACGAATACTCTGAAAAAATTTTTTAATAATAGTAGGAAAGCAGTGATCAAGGATGAACA  
AGCAGG

177. >MSTRG.3555.3 Gene=MSTRG.3555

GACATTTCTTGAGTCGTCTTCGAACGGACAAGGCTGTATCTTGCTCGGTGATTTATAGTCTT  
GTGTGTAGTTGTGCAACTTTCTTCCATTGTTCTACAAGAAACACGAGCCAGATACAGTCTCA  
CCGTTTGAGATGGCATTGGAACGGACGGAGGAACCTGCTGTTTGCAGCGATGCTGGGCGTA  
CCGCAGAATTGGGGACCCCATGTTCTAGTCTCTACACCTTTCATTGGTTTGGTTTGTAACTG  
TATCGGAACCAATGCATTTCTATTTGCAATATTTTTGTAAATAATATACCAATCGAGTTCGTCA  
AACAAGTTAAAAGAGCGTTTGATTGATATTTTTTTTTTTTTCAGAAGTATGGCGGTTTACGTA  
AAAAAATGTGTACTTATATAGCTTAAAGAAAATTTGTATAGTCAATTTAACCTTTATAGATT  
TAAATAGCGTTTTAAATGTTTACTTAATGATCGAAGAATAATTTTATATGTAGATTTTGTACT  
TACTTATAAATGTTAATTAACAGTTTTGTAAATATTGTGATACAGCAAAACAGCAGCGGAA  
AAAATAAAAAAGAATGATAAAAATTAATAATGTTAATAATTTTCCTATGATTTTTAAATCG  
CCATATTAATGCCAAAAATCCTTTTCAGTCCAGCATACTACATAAAATTCTGTCTGAACGCA  
AGAGTGTCCCGCACGTGTGTCCAGGCTGTTGGTCGTCATCGGCGACACTATTTGGCCTGTCT  
ATATATGAGATAAGGAATGGTGAGAGGATTGGTATGGGATGAACAAAGGGGCAAAATCTT  
TGTTTTTAGAAATTTGCACACCACGATCAAGTCGTACATAAACGTCTTCTCATGTTTCGCGCTT  
CCGTATCTTGAACATCTGAGCATCGACTAATTCAAAAATCAATGTGATGCGTGATATACAT  
AGGCTTACTGTGACATACTGCAGCAACCTCGAGCAAGTTCTATTTTGAATACCCAATTTTCG  
TAATCATGGTGTACAATAAACAATAACAAGCAGTTATTTCTATTCCTGGAGCATGTTGGAT  
TCGTATTGCAAAGTGGTATGTTGATTAGAATGATCTAGTTCCGAGTTGTAGGGGTGGGAGG  
GAGTTACTATGTTTCAGCTAAGCTTGGATAGAGAAAAAATCTATTTAATCGACGAGGTATA

TAAAGATGTACTGAAAATATATTTTGGTAACTCCTAATTGGATAAAATATGAATAATTTTTTA  
 ATCTTAATAAATATCACAATCTATATATCTATTTATATAACTGCATTTTTGACAAGAAATATT  
 GATAAAAAAAAAAAGGTAAAAAATCCGATTTTTAAAATAGAAAAGGTATGTTTTGGTT  
 GAAGGTAACAATTTAATATGATCAATGATTTGTAATAAATAGTTGAAAAACGAGAAATA  
 GGTGAAATTATTATACTGTAAGCTGCAGGTTTAGTATTATATTTATCTTTCATCATAATGGAT  
 GCTATATTATCGATGACATTTTATAATAATGGAGATATATCCTATATTATATCTGCAATACC  
 AGGAAATAATTCTACAATTTCAACTATTTGAACTATTCACAATTATAATAGATAAACATGAT  
 GCAATATATTTCAATTCGGCTGAAGAAGAAATTCAATTGACAATGGAAACAGATTTCTGCTA  
 AAAGAAGAGTAAACTGATTGTAATATATATCATTGTTTACTATTTTACGTTTAACTATTTTA  
 GATCTACAAAAATTGACATTTCAATTTAATAAATGTATTTTAAAATTACATTTGACCTTGATA  
 TTTTATAATTTATCAAGACATAGGTATAGGACATAGGTCTAGGAAAAAGGAGACAAAGG  
 AATAAAGCTGCCGATGGTTTTATTTTTTCACAATGAGA

178. >MSTRG.3555.2 Gene=MSTRG.3555

GACATTTCTGAGTCGTCTTCGAACGGACAAGGCTGTATCTTGCTCGGTGATTTATAGTCTT  
 GTGTGTAGTTGTGCAACTTTCTTCCATTGTTCTACAAGAAACACGAGCCAGATACAGTCTCA  
 CCGTTTGAGATGGCATTGGAACGGACGGAGGAACCTGCTGTTTGCAGCGATGCTGGGCGTA  
 CCGCAGAATTGGGGACCCCATGTTCTAGTCTCTACACCTTTCATTGGTTTGGTTTGTAACCTG  
 TATCGGAACCAATGCATTTCTATTTGCAATATTTTTGTAATAATATACCAATCGAGTTCGTCA  
 AACAAGTTAAAAGAGCGTTTGATTGATATTTTTTTTTTTTTCAGAAGTATGGCGGTTTACGTA  
 AAAAAATGTGTACTTATATAGCTTAAAGAAAATTTGTATAGTCAATTTAACCTTTATAGATT  
 TAAATAGCGTTTTAAATGTTTACTTAAATGATCGAAGAATAATTTTATATGTAGATTTTGTACT  
 TACTTATAAATGTTAATTAACAGTTTTGTAAATATTGTGATACAGCAAAACAGCAGCGGAA  
 AAAATAAAAAAGAATGATAAAAATTAAAAATGTTAATAATTTTCTATGATTTTTAAATCG  
 CCATATTAATGCCAAAAATCCTTTTCAGTCCAGCATACTACATAAAATTCTGTGCAACGCA  
 AGAGTGTCCCGCACGTGTGTCCAGGCTGTTGGTCGTCATCGGCGACACTATTTGGCCTGTCT  
 ATATATGAGATAAGGAATGGTGAGAGGATTGGTATGGGATGAACAAAGGGGCAAAATCTT  
 TGTTTTTAGAAATTTGCACACCACGATCAAGTCGTACATAAACGTCTTCTCATGTTCCGCGCTT  
 CCGTATCTTGAACATCTGAGCATCGACTAATTCAAAAATCAATGTGATGCGTGATATACAT  
 AGGCTTACTGTGACATACTGCAGCAACCTCGAGCAAGTTCTATTTTGGTGAGCTAATCCCTT  
 CTGTTCTGTTACCTGTGCAATATATTTTCTCAGGTCCAGAAAAATTTTCCAATGTTTATGCA  
 ACCGAGTTCTATATATGGGTTTCCCTGGCTTATTAATAAATCCTGTTCAAAGTTGATCAAGC  
 TGGATACTAGACATCATATATATTGTCCCATTTGAATTAAAATGTATAAAAGCTTCAAGGTA  
 TGGAGTAAATTAAATGCATCTTTGTTGAATTTAGATGATCCAGTAAGGCGAGTTACTGCAA  
 GTAGCACAACTAATTTTAATAATAGGCATGCATATAAAATATAAACAGCTCAATTTGAATA  
 GGAAATTGCTACAAATTTTTTACTATATTAATATATTTTTTTGGGAATCATTACTAGATACT  
 TACTTTTACAGATTTTGATATTACTTCGCTTACTCATTGGGTCGTAGAGCAAGAAGAAGTT  
 AATGTATCATTAGATTAACAAAAAAATTCCTGATAAGTGATGTGCAACAGGGTTATGGAA  
 GTAAAGAGACCGATTTAATATTACAGTTAATTGATTTGAGAAATACATTGAGAATTAACG  
 AATACTCTGAAAAAATTTTTTAATAATAGTAGGAAAGCAGTGATCAAGGATGAACAAGCA  
 GGATATTTCTAAATTAAATTTTTAAGTATAACATGTAGATAATTTTTTATATTTTGATTTTA  
 AAAAACAAAATTATGTTTAATGTTTTTAAATTTCCAAGGAAGTACATCATCAATGATTCAATT  
 CTCGGATGTTGGAAATTGTTTACAATTAATTGTACAATCATAATTAAGCAAGTTAAAGGTTT

GATTTGAAGTTTGTTCAAAGGAATTTAATTTCTTCTACACATGGTTGCAAATGCAATGTGAA  
GTATCATGCTTTTATAATTGTTTTAAATATTTTTCTTGAAATATTGTGGTTCGGGTGTTTGT  
TGTAAGTGCAGGAATACCCAATTCGTAATCATGGTGTACAATAACAATAACAAGCAGTT  
ATTTCTATTCTGGAGCATGTTGGATTCGTATTGCAAAGTGGTATGTTGATTAGAATGATCTA  
GTTCCGAGTTGTAGGGGTGGGAGGGAGTTACTATGTTTCAGCTAAGCTTGGATAGAGAAAA  
AATCTATTTAATCGACGAGGTATATAAAGATGTACTGAAAATATATTTTGGTAACTCCTAAT  
TGGATAAATATGAATAATTTTTTAATCTTAATAAATATCACAATCTATATATCTATTTATATA  
ACTGCATTTTTGACAAGAAATATTGATAAAAAAAAAAAGGTAAAAAATCCGATTTTTAA  
AATAGAAAAGGTATGTTTTGGTTGAAGGTAACAATTTAATATGATCAATGATTGTGAATAA  
ATAGTTGAAAAAACGAGAAATAGGTGAAATTATTATACTGTAAGCTGCAGGTTTAGTATTA  
TATTTATCTTTCATCATAATGGATGCTATATTATCGATGACATTTTATAATAATGGAGATATA  
TCCTATATTATATCTGCAATACCAGGAAATAATTCTACAATTTCAACTATTTGAACTATTCA  
CAATTATAATAGATAAACATGATGCAATATATTTCAATTCGGCTGAAGAAGAAATTCAATTG  
ACAATGGAAACAGATTTCTGCTAAAAAGAAGAGTAAAACTGATTGTAATATATATCATTGTT  
TACTATTTTACGTTTAACTATTTTAGATCTACAAAAATTGACATTTCAATTTAATAAATGTAT  
TTTAAAATTACATTTGACCTTGATATTTTTATAATTTATCAAGACATAGGTATAGGACATAG  
GTCTAGGAAAAAGGAGACAAAGGAATAAAGCTGCCGATGGTTTTATTTTTTCACAATGAGA  
AAAAGGCGGATTAGTATATATTTCAAATAATTTAAATATAAAAATTAGTTATAGCATGTTAAT  
AAGCATGGTAGTGTTATATTCATAGAAATGCTCAAATTATCGTTATTTAAATATACCTGTTTT  
GGCTCTTTTGGATGTTTGTGATTTTTGCTTCAGGAAATCGAAGATAATTTTATTCTTATATGA  
ATTTTATGATAAATTTTCTATTCTATGGAGAAAAATGCTATGAAATACACCTGAATATGTAT  
GTATTATATAAATATTATTTTTATTATATTTAGAAAACGATGCCGGATATATGAACAGTATA  
AATATAAAGCTTATATTCAAGATAACAACGGGGTGAATAACTATCGATATTTGATATATTTA  
TGAAGATAAGTTTTCAATTATATTTAAATATGATAATATATAAGTTGAAATAAATTTTTATTG  
AAATTTTTTATTTAAAAAGAAAAAGATGAAGGATTAAATTACTAACTTTATAGTATCTAGATA  
CATTTCAGAAAATTTGTGATATAGAAAAAAATTTTCTAAATGGAAGAGAGGTCATTGTTAT  
ATCATCTTAGCCGAGATTTGATTAAGACTTGGCTGAATCTAAATTTATTTTAGATAATAAAA  
AAAGTATGTGTCAGGTAAATTAAATGTTCAAAAAACTTACATATTTTAAAAATGTATTTAA  
ATATGTTGTTAAAAATAACTTCGGTTATATCAAGATTATAGTTTATCTAAATTGATGAACAT  
GAGTTTTCATTTTCGATTTTACTTTTTGAAGAAAATATCGAATATTAAATCGAATATATCTAT  
TCAAGAAAAATTTAAATCAAGATAAATTGTTACAACCTGAAATGCTGATTACGTTCAATTA  
AATGGATCATTGGATAATTGAAATATATTCGACAAGATTTTTAAATTAATAACTTTATAAAT  
CTCTCCTAATTAGAAAAGAAATATAAATGTTCTTTTTTTTTTATTGAGAAATGATTTTAAATC  
TAATAAATAATGATCTGAAATTAATTCGAGTAAAATCTGTCTGACATACAACAATTGAAGA  
TTTTGAATGTAAAAAAATTGACGCAAAATTAATAAGGATTTAATTTTTTCATTAATAAAAT  
TAATGATGAGTGTACATTTTCAGAACATATTTGAAAATATTTAAAAAATATATATATATAA  
AATTGAAGTAATTTCTTTGTAATAAAAAATAATATAAAGTGAATAGAATAATAGAAATAC  
AAATAGTAATCTATAACATCTGGCATAGTTCGAATTATTAATAAATGATTATATTCTTCAAAA  
AACATAACCTTAAAAGAGAATCAACGTGGGATTTTATGGTATATCTACTACATTGATTCAA  
AGGAGACTCGATACGAGTCTTTCTAGGATTCAAAGATTATCAACGTAGGATTCAGAAGAAA  
TTATCACAGGATTTTGAAGGATTTAAAGAAGACTATCAACGCGGGACTTCATGAAATTCAG  
AAGATCGACTCAGGATTTCTGTGAGATTCGGAAAAGGTTACTGATGCGGGACTTCGTGGGAT  
TCAAAAAACTATCAACGCGGGACTTTGTGGGATTCGAAGAAAGACTATCAACGTGGGACTT

CGTGGGATTCAAAGAAGACTATCAACGCCGGACTGTGGGATTCCAAGAAGACTATCAACG  
TGGGACTTCGTGGGATTCAAAGAAGAGTATCGACGTGGGACTTCGTGGGATTCAAAGAGG  
ACTATCGACGTGGGACTTCGTGGGATTCAAAGAAGACTATCGACGCCGGGACTTCGTGGGAT  
TCAAAGAAAACACTATCAACGCCGGACTGTGGGATTCAAAGAAGACTATCAACGCTGGATCG  
AGGGATTCAAAGAAGACTATCAACGTGGGACTTCGTGGGATTCAAAGAAGACTATCAACA  
TCGGACTGTGGGATTCAAAGAAGATTATCAACGTGGGACTTCGTGGGATTCAAAGAAGATT  
ATGAACGCAGAACCTTTGTGGGATTCAAAGAAGATCATCAATACGGTTTAATGAAATTTTCAT  
GATAAATTATTAATGCGGGATTTTATAGGATTGTAGGAAAGCGCCTTCGTATTCAAAAAA  
GACTTCGATGAAATTTGTAATCCAAAAAACCGTCATTGCCAGATATCATGAAATTCAAAAG  
GAATATTAAAAAAGATTTAATGAAATTTAAATATTAGCGAGATAAATTTTTAAAGATATA  
AAAAATTATTGAAATTGGAATTAGAAACAAATCTCAAATTCTGATATT

179. >MSTRG.3555.7 Gene=MSTRG.3555

GACATTTCTGAGTCGTCTTCGAACGGACAAGGCTGTATCTTGCTCGGTGATTTATAGTCTT  
GTGTGTAGTTGTGCAACTTTCTTCCATTGTTCTACAAGAAACACGAGCCAGATACAGTCTCA  
CCGTTTGAGATGGCATTGGAACGGACGGAGGAACCTTGCTGTTTGCAGCGATGCTGGGCGTA  
CCGCAGAATTGGGGACCCCATGTTCTAGTCTCTACACCTTTCATTGGTTTGGTTTGTAACTG  
TATCGGAACCAATGCATTTCTATTTGCAATATTTTTGTAATAATATACCAATCGAGTTCGTCA  
AACAAGTTAAAAGAGCGTTTGATTGATATTTTTTTTTTTTCAGAAGTATGGCGGTTTACGTA  
AAAAAATGTGTACTTATATAGCTTAAAGAAAATTTGTATAGTCAATTTAACCTTTATAGATT  
TAAATAGCGTTTTAAATGTTTACTTAATGATCGAAGAATAATTTTATATGTAGATTTTGTACT  
TACTTATAAATGTTAATTAACAGTTTTGTAAATATTGTGATACAGCAAAACAGCAGCGGAA  
AAAATAAAAAAGAATGATAAAAATTAATAATGTTAATAATTTTCCTATGATTTTTAAATCG  
CCATATTAATGCCAAAAATCCTTTTCAGTCCAGCATACTACATAAAATTCTGTGCAACGCA  
AGAGTGTCCCGCACGTGTGTCCAGGCTGTTGGTCGTCATCGGCGACACTATTTGGCCTGTCT  
ATATATGAGATAAGGAATGGTGAGAGGATTGGTATGGGATGAACAAAGGGGCAAAATCTT  
TGTTTTTAGAAATTTGCACACCACGATCAAGTCGTACATAAACGTCTTCTCATGTTTCGCGCTT  
CCGTATCTTGAACATCTGAGCATCGACTAATTCAAAAAATCAATGTGATGCGTGATATACAT  
AGGCTTACTGTGACATACTGCAGCAACCTCGAGCAAGTTCTATTTTGGTGAGCTAATCCCTT  
CTGTTGTTACCTGTGCAAATATATTTTCTCAGGTCCAGAAAAATTTTCCAATGTTTATGCA  
ACCGAGTTCTATATATGGGTTTCCCTGGCTTATTAATAAATCCTGTTCAAAGTTGATCAAGC  
TGGATACTAGACATCATATATATTGTCCCATTTGAATTAATAATGTATAAAAGCTTCAAGGTA  
TGGAGTAAATTAAATGCATCTTTGTTGAATTTAGATGATCCAGTAAGGCGAGTTACTGCAA  
GTAGCACAACTAATTTTAATAATAGGCATGCATATAAAATATAAACAGCTCAATTTGAATA  
GGAAATTGCTACAAATTTTTTACTATATTAATATATTTTTTTGGGAATCATTACTAGATACT  
TACTTTTACAGATTTTGATATTACTTCGCTTACTCATTGGGTCGTAGAGCAAGAAGAACTT  
AATGTATCATTAGATTAACAAAAAAAATTCCTGATAAGTGATGTGCAACAGGGTTATGGAA  
GTAAAGAGACCGATTTAATATTACAGTTTAATTGATTTGAGAAATACATTGAGAATTAACG  
AATACTCTGAAAAAATTTTTTAATAATAGTAGGAAAGCAGTGATCAAGGATGAACAAGCA  
GGATATTTCTAAATTAATTTTTTAAGTATAACATGTAGATAATTTTTTATATTTTGATTTTA  
AAAAACAAAATTATGTTTAATGTTTTTAAATTCCAAGGAAGTACATCATCAATGATTCAATT  
CTCGGATGTTGGAAATTGTTTACAATTAATTGTACAATCATAATTAAGCAAGTTAAAGGTTT  
GATTTGAAGTTTGTTCAAAGGAATTTAATTTCTTCTACACATGGTTGCAAATGCAATGTGAA

GTATCATGCTTTTATAATTGTTTTAAATATTTTTCTTGAAATATTGTGGTTCGGGTGTTTGTTT  
TGTACTGCAGGAATACCCAATTCGTAATCATGGTGTACAATAACAATAACAAGCAGTT  
ATTTCTATTCTGAGCATGTTGGATTCTGATTGCAAAGTGAAGAGAATCAACGTGGGATTT  
TATGGTATATCTACTACATTGATTCAAAGGAGACTCGATACGAGTCTTTCTAGGATTCAAAG  
ATTATCAACGTAGGATTCAGAAGAAATTATCACAGGATTTTGAAGGATTTAAAGAAGACTA  
TCAACGCGGGACTTCATGAAATTCAGAAGATCGACTCAGGATTTCTGTGAGATTCCGAAAAG  
GTTACTGATGCGGGACTTCGTGGGATTCAAAAAACTATCAACGCGGGACTTTGTGGGATTC  
GAAGAAAGACTATCAACGTGGGACTTCGTGGGATTCAAAGAAGACTATCAACGCCGGACT  
GTGGGATTCCAAGAAGACTATCAACGTGGGACTTCGTGGGATTCAAAGAAGAGTATCGAC  
GTGGGACTTCGTGGGATTCAAAGAGGACTATCGACGTGGGACTTCGTGGGATTCAAAGAAG  
ACTATCGACGCGGGACTTCGTGGGATTCAAAGAAAACTATCAACGCCGGACTGTGGGATTC  
AAAGAAGACTATCAACGCTGGATCGAGGGATTCAAAGAAGACTATCAACGTGGGACTTCG  
TGGGATTCAAAGAAGACTATCAACATCGGACTGTGGGATTCAAAGAAGATTATCAACGTG  
GGACTTCGTGGGATTCAAAGAAGATTATGAACGCAGAACTTTGTGGGATTCAAAGAAGATC  
ATCAATACGTTTTAATGAAATTTTCATGATAAATTATTAATGCGGGATTTTATAGGATTGTAG  
GAAAGCGCCTTCGTATTCAAAAAAAGACTTCGATGAAATTTGTAATCCAAAAAACCGTCAT  
TGCCAGATATCATGAAATTCAAAAGGAATATTAAAAAAAGATTTAATGAAATTTAAATATT  
AGCGAGATAAATTTTTAAAGATATAAAAAAATTATTGAAATTGGAATTAGAAACAAATCTCA  
AATTCTGATATT

180. >MSTRG.3555.1 Gene=MSTRG.3555

GACATTTCTGAGTCGTCTTCGAACGGACAAGGCTGTATCTTGCTCGGTGATTTATAGTCTT  
GTGTGTAGTTGTGCAACTTTCTTCCATTGTTCTACAAGAAACACGAGCCAGATACAGTCTCA  
CCGTTTGAGATGGCATTGGAACGGACGGAGGAACCTGCTGTTTGCAGCGATGCTGGGCGTA  
CCGCAGAAATTGGGGACCCCATGTTCTAGTCTCTACACCTTTCATTGGTTTGGTTTGTAACCTG  
TATCGGAACCAATGCATTTCTATTTGCAATATTTTTGTAATAATATACCAATCGAGTTCGTCA  
AACAAAGTTAAAAGAGCGTTTGATTTCGATATTTTTTTTTTTTCAGAAGTATGGCGGTTTACGTA  
AAAAATGTGTACTTATATAGCTTAAAGAAAATTTGTATAGTCAATTTAACCTTTATAGATT  
TAAATAGCGTTTTAAATGTTTACTTAATGATCGAAGAATAATTTTATATGTAGATTTTGTACT  
TACTTATAAATGTTAATTAACAGTTTTGTAAATATTGTGATACAGCAAAACAGCAGCGGAA  
AAAATAAAAAAGAATGATAAAAATTAAAAATGTTAATAATTTTCTATGATTTTTAAATCG  
CCATATTAATGCCAAAAATCCTTTTCAGTCCAGCATACTACATAAAATTCTGTGCAACGCA  
AGAGTGTCCCGCACGTGTGTCCAGGCTGTTGGTCGTCATCGGCGACACTATTTGGCCTGTCT  
ATATATGAGATAAGGAATGGTGAGAGGATTGGTATGGGATGAACAAAGGGGCAAAATCTT  
TGTTTTTAGAAATTTGCACACCACGATCAAGTCGTACATAAACGTCTTCTCATGTTTCGCGCTT  
CCGTATCTTGAACATCTGAGCATCGACTAATTCAAAAAATCAATGTGATGCGTGATATACAT  
AGGCTTACTGTGACATACTGCAGCAACCTCGAGCAAGTTCTATTTTGGTGAGCTAATCCCTT  
CTGTTTCGTTACCTGTGCAAATATATTTTCTCAGGTCCAGAAAAATTTTCCAATGTTTATGCA  
ACCGAGTTCTATATATGGGTTTCCCTGGCTTATTAATAAATCCTGTTCAAAGTTGATCAAGC  
TGGATACTAGACATCATATATATTGTCCCATTTGAATTAATAAATGTATAAAAGCTTCAAGGTA  
TGGAGTAAATTAATGCATCTTTGTTGAATTTAGATGATCCAGTAAGGCGAGTTACTGCAA  
GTAGCACAATAATTTAATAATAGGCATGCATATAAAATATAAACAGCTCAATTTGAATA  
GGAAATTGCTACAAATTTTTTACTATATTAATATATTTTTTTGGGAATCATTACTAGATACT



TACTTTTCACAGATTTTGATATTACTTCGCTTACTCATTGGGTCGTAGAGCAAGAAGAACTT  
AATGTATCATTAGATTAACAAAAAAATTCCTGATAAGTGATGTGCAACAGGGTTATGGAA  
GTAAAGAGACCGATTTAATATTACAGTTTAATTGATTTGAGAAATACATTGAGAATTAACG  
AATACTCTGAAAAAATTTTTTAATAATAGTAGGAAAGCAGTGATCAAGGATGAACAAGCA  
GGATATTTCTAAATTAAATTTTTAAGTATAACATGTAGATAATATTTTTATATTTTGATTTTA  
AAAAACAAAATTATGTTTAATGTTTTTAATTTCCAAGGAAGTACATCATCAATGATTCAATT  
CTCGGATGTTGGAAATTGTTTACAATTAATTGTACAATCATAATTAAGCAAGTTAAAGGTTT  
GATTTGAAGTTTGTTCAAAGGAATTTAATTTCTTCTACACATGGTTGCAAATGCAATGTGAA  
GTATCATGCTTTTATAAATTGTTTTAAATATTTTTTCTTGAAATATTGTGGTTCGGGTGTTTGT  
TGTACTGCAGGAATACCCAATTTCTGTAATCATGGTGTACAATAACAATAACAAGCAGTT  
ATTTCTATTCTGGAGCATGTTGGATTCGTATTGCAAAGTGGTATGTTGATTAGAATGATCTA  
GTTCCGAGTTGTAGGGGTGGGAGGGAGTTACTATGTTTCAGCTAAGCTTGGATAGAGAAAA  
AATCTATTTAATCGACGAGGTATATAAAGATGTACTGAAAATATATTTTGTAACCTCCTAAT  
TGGATAAATATGAATAATTTTTTAATCTTAATAAATATCACAATCTATATCTATTTATATA  
ACTGCATTTTTGACAAGAAATATTGATAAAAAAAAAAAGGTAAAAAATCCGATTTTTAA  
AATAGAAAAGGTATGTTTTGGTTGAAGGTAACAATTTAATATGATCAATGATTTGTAATAA  
ATAGTTGAAAAACGAGAAATAGGTGAAATTATTATACTGTAAGCTGCAGGTTTAGTATTA  
TATTTATCTTTCATCATAATGGATGCTATATTATCGATGACATTTTATAATAATGGAGATATA  
TCCTATATTATATCTGCAATACCAGGAAATAATTCTACAATTTCAACTATTTGAACTATTCA  
CAATTATAATAGATAAACATGATGCAATATATTTTCATTTCGGCTGAAGAAGAAATTCAATTG  
ACAATGGAAACAGATTTCTGCTAAAAAGAGTAAACTGATTGTAATATATATCATTGTT  
TACTATTTTACGTTTAACTATTTTAGATCTACAAAAATTGACATTTCATTTTAATAAATGTAT  
TTTAAAATTACATTTGACCTTGATATTTTTTATAATTTATCAAGACATAGGTATAGGACATAG  
GTCTAGGAAAAAGGAGACAAAGGAATAAAGCTGCCGATGGTTTTATTTTTTCACAATGAGA  
AAAAGGCGGATTAGTATATATTTCAAATAATTTAAATATAAAATTAGTTATAGCATGTTAAT  
AAGCATGGTAGTGTTATATTCATAGAAATGCTCAAATTATCGTTATTTAAATATACCTGTTTT  
GGCTCTTTTGGATGTTTGTGATTTTTGCTTCAGGAAATCGAAGATAATTTTATTCTTATATGA  
ATTTTATGATAAATTTTCTATTCTATGGAGAAAAATGCTATGAAATACACCTGAATATGTAT  
GTATTATATAAATATTATTTTTATTATATTTAGAAAACGATGCCGATATATGAACAGTATA  
AATATAAAGCTTATATTCAAGATAACAACGGGGTGAATAACTATCGATATTTGATATATTTA  
TGAAGATAAGTTTTCAATTATATTTAAATATGATAATATATAAGTTGAAATAAATTTTTATTG  
AAATTTTTTATTTAAAAAGAAAAAGATGAAGGATTAAATTACTAACTTTATAGTATCTAGATA  
CATTTCAGAAAATTTGTGATATAGAAAAAAATTTTCTAAATGGAAGAGAGGTCATTGTTAT  
ATCATCTTAGCCGAGATTTGATTAAGACTTGGCTGAATCTAAATTTATTTTAGATAATAAAA  
AAAGTATGTGTCAGGTAAATTAAATGTTCAAAAAACTTACATATTTTAAAAATGTATTTAAA  
ATATGTTGTTAAAAATAACTTCGGTTATATCAAGATTATAGTTTATCTAAATTGATGAACAT  
GAGTTTTTCATTTTCGATTTTACTTTTTGAAGAAAATATCGAATATTAAATCGAATATATCTAT  
TCAAGAAAAATTTAAATCAAGATAAATTGTTACAACCTGAAATGCTGATTACGTTCAATTA  
AATGGATCATTGGATAATTGAAATATATTCGACAAGATTTTTAAATTAATAACTTTATAAAT  
CTCTCCTAATTAGAAAAGAAATATAAATGTTCTTTTTTTTTTATTGAGAAATGATTTTAAATC  
TAATAAATAATGATCTGAAATTAATTCGAGTAAAATCTGTCTACATACAACAATTGAAGA  
TTTTGAATGTAAAAAAATTTGACGCAAAATTAATAAGGATTTAATTTTCATTAATAAAGT  
AAGAATTGTTTAATAAAATATATTTTAATTAAGTACATAATATTCAATCGGTAATAAATTT

TTTCATTTTCAGATTTAATGATGAGTGTACATTTTCAGAACATATTTGAAAATATTTAAAAAA  
 ATATATATATATAAAATTGAAGTAATTTTCTTTGTAATAAAAAATAATATAAAGTGAATAG  
 AATAATAGAAATACAAATAGTAATCTATAACATCTGGCATAGTTCTGAATTATTAATAAATGA  
 TTATATTCTTCAAAAAACATAACCTTAAAGAGAATCAACGTGGGATTTTATGGTATATCTA  
 CTACATTGATTCAAAGGAGACTCGATACGAGTCTTTCTAGGATTCAAAGATTATCAACGTA  
 GGATTCAGAAGAAATTATCACAGGATTTCTGAAGGATTTAAAGAAGACTATCAACGCGGGA  
 CTTTCATGAAATTCAGAAGATCGACTCAGGATTTCTGTGAGATTTCGAAAAGGTTACTGATGC  
 GGGACTTCTGTGGGATTCAAAAACTATCAACGCGGGACTTTGTGGGATTCTGAAGAAAGACT  
 ATCAACGTGGGACTTCTGTGGGATTCAAAGAAGACTATCAACGCCGGACTGTGGGATTCCAA  
 GAAGACTATCAACGTGGGACTTCTGTGGGATTCAAAGAAGAGTATCGACGTGGGACTTCTGT  
 GGATTCAAAGAGGACTATCGACGTGGGACTTCTGTGGGATTCAAAGAAGACTATCGACGCG  
 GGACTTCTGTGGGATTCAAAGAAAACCTATCAACGCCGGACTGTGGGATTCAAAGAAGACTA  
 TCAACGCTGGATCGAGGGATTCAAAGAAGACTATCAACGTGGGACTTCTGTGGGATTCAA  
 GAAGACTATCAACATCGGACTGTGGGATTCAAAGAAGATTATCAACGTGGGACTTCTGTGG  
 ATTCAAAGAAGATTATGAACGCAGAACTTTGTGGGATTCAAAGAAGATCATCAATACGGTT  
 TAATGAAATTTTCATGATAAATTATTAATGCGGGATTTTATAGGATTGTAGGAAAGCGCCTTC  
 GTATTCAAAAAAAGACTTTCGATGAAATTTGTAATCCAAAAAACCGTCATTGCCAGATATCA  
 TGAAATTCAAAGGAATATTAAAAAAAGATTTAATGAAATTTAAATATTAGCGAGATAAA  
 TTTTAAAGATATAAAAAATTATTGAAATTGGAATTAGAAACAAATCTCAAATTCTGATATT  
 TGAAACTTATTACCAAATACAAGTGTGTTACTTAATGAATTTTCTAAAGAAAGGA

181. >MSTRG.3555.4 Gene=MSTRG.3555

GACATTTTCTGAGTCGTCTTCGAACGGACAAGGCTGTATCTTGCTCGGTGATTTATAGTCTT  
 GTGTGTAGTTGTGCAACTTTCTTCCATTGTTCTACAAGAAACACGAGCCAGATACAGTCTCA  
 CCGTTTGAGATGGCATTGGAACGGACGGAGGAACCTTGCTGTTTGCAGCGATGCTGGGCGTA  
 CCGCAGAATTGGGGACCCCATGTTCTAGTCTCTACACCTTTCATTGGTTTGGTTTGTAAACTG  
 TATCGGAACCAATGCATTTCTATTTGCAATATTTTTGTAATAATATACCAATCGAGTTCGTCA  
 AACAAGTTAAAAGAGCGTTTGATTTCGATATTTTTTTTTTTTCAGAAGTATGGCGGTTTACGTA  
 AAAAAATGTGTACTTATATAGCTTAAAGAAAATTTGTATAGTCAATTTAACCTTTATAGATT  
 TAAATAGCGTTTTAAATGTTTACTTAATGATCGAAGAATAATTTTATATGTAGATTTTGTACT  
 TACTTATAAATGTTAATTAACAGTTTTGTAAATATTGTGATACAGCAAAACAGCAGCGGAA  
 AAAATAAAAAAGAATGATAAAAATTAATAATGTTAATAATTTTCTATGATTTTTAAATCG  
 CCATATTAATGCCAAAAATCCTTTTCAGTCCAGCATACTACATAAAATTCTGTCTGAACGCA  
 AGAGTGTCCCGCACGTGTGTCCAGGCTGTTGGTCTGTCATCGGCGACACTATTTGGCCTGTCT  
 ATATATGAGATAAGGAATGGTGAGAGGATTGGTATGGGATGAACAAAGGGGCAAAATCTT  
 TGTTTTTAGAAATTTGCACACCACGATCAAGTCGTACATAAACGTCTTCTCATGTTTCGCGCTT  
 CCGTATCTTGAACATCTGAGCATCGACTAATTCAAAAATCAATGTGATGCGTGATATACAT  
 AGGCTTACTGTGACATACTGCAGCAACCTCGAGCAAGTTCTATTTTGGTGAGCTAATCCCTT  
 CTGTTCTGTTACCTGTGCAAATATATTTCTCAGGTCCAGAAAAATTTTCCAATGTTTATGCA  
 ACCGAGTTCTATATATGGGTTTCCCTGGCTTATTAATAAATCCTGTTCAAAGTTGATCAAGC  
 TGGATACTAGACATCATATATATTGTCCCATTGAATTAAATGTATAAAAGCTTCAAGGTA  
 TGGAGTAAATTAATGCATCTTTGTTGAATTTAGATGATCCAGTAAGGCGAGTTACTGCAA  
 GTAGCACAACTAATTTTAATAATAGGCATGCATATAAAATATAAACAGCTCAATTTGAATA

GGAAATTGCTACAAATTTTTTACTATATTAATATATTTTTTTGGGAATCATTACTAGATACT  
TACTTTTCACAGATTTTGATATTACTTCGCTTACTCATTGGGTCGTAGAGCAAGAAGAACTT  
AATGTATCATTAGATTAACAAAAAAATTCCTGATAAGTGATGTGCAACAGGGTTATGGAA  
GTAAAGAGACCGATTTAATATTACAGTTTAATTGATTTGAGAAATACATTGAGAATTAACG  
AATACTCTGAAAAAATTTTTTAATAATAGTAGGAAAGCAGTGATCAAGGATGAACAAGCA  
GGATATTTCTAAATTAATTTTTTAAGTATAACATGTAGATAATATTTTTATATTTTGATTTA  
AAAAACAAAATTATGTTTAATGTTTTTAATTTCCAAGGAAGTACATCATCAATGATTCAATT  
CTCGGATGTTGGAAATTGTTTACAATTAATTGTACAATCATAATTAAGCAAGTTAAAGGTTT  
GATTTGAAGTTTGTTCAAAGGAATTTAATTTCTTCTACACATGGTTGCAAATGCAATGTGAA  
GTATCATGCTTTTATAATTGTTTTAAATATTTTTTCTTGAAATATTGTGGTTCGGGTGTTTGTTT  
TGTA CTGCAGGAATACCCAATTTCTGAATCATGGTGTACA ACTAAACA ACTACAAGCAGTT  
ATTTCTATTCCTGGAGCATGTTGGATTCGTATTGCAAAGTGGTATGTTGATTAGAATGATCTA  
GTTCCGAGTTGTAGGGGTGGGAGGGAGTTACTATGTTTCAGCTAAGCTTGGATAGAGAAAA  
AATCTATTTAATCGACGAGGTATATAAAGATGTACTGAAAATATATTTTGGTAACTCCTAAT  
TGGATAAATATGAATAATTTTTTAATCTTAATAAATATCACAATCTATATATCTATTTATATA  
ACTGCATTTTTGACAAGAAATATTGATAAAAAAAAAAAGGTAAAAAATCCGATTTTTAA  
AATAGAAAAGGTATGTTTTGGTTGAAGGTAACAATTTAATATGATCAATGATTTGTAATAA  
ATAGTTGAAAAAACGAGAAATAGGTGAAATTATTATACTGTAAGCTGCAGGTTTAGTATTA  
TATTTATCTTTCATCATAATGGATGCTATATTATCGATGACATTTTATAATAATGGAGATATA  
TCCTATATTATATCTGCAATACCAGGAAATAATTCTACAATTTCAACTATTTGAACTATTCA  
CAATTATAATAGATAAACATGATGCAATATATTTTCATTTCGGCTGAAGAAGAAATTCAATTG  
ACAATGGAAACAGATTTCTGCTAAAAGAAGAGTAAACTGATTGTAATATATATCATTGTT  
TACTATTTTACGTTTAACTATTTTAGATCTACAAAATTGACATTTCATTTTAATAAATGTAT  
TTTAAAATTACATTTGACCTTGATATTTTTTATAATTTATCAAGACATAGGTATAGGACATAG  
GTCTAGGAAAAAGGAGACAAAGGAATAAAGCTGCCGATGGTTTTATTTTTTCACAATGAGA  
AAAAGGCGGATTAGTATATATTTCAAATAATTTAAATATAAAATTAGTTATAGCATGTTAAT  
AAGCATGGTAGTGTTATATTCATAGAAATGCTCAAATTATCGTTATTTAAATATACCTGTTTT  
GGCTCTTTTGGATGTTTGTGATTTTTTGCTTCAGGAAATCGAAGATAATTTTATTCCTATATGA  
ATTTTATGATAAATTTTCTATTCTATGGAGAAAAATGCTATGAAATACACCTGAATATGTAT  
GTATTATATAAATATTATTTTTATTATATTTAGAAAACGATGCCGGATATATGAACAGTATA  
AATATAAAGCTTATATTCAAGATAACAACGGGGTGAATAACTATCGATATTTGATATATTTA  
TGAAGATAAGTTTTCAATTATATTTAAATATGATAATATATAAGTTGAAATAAATTTTTATTG  
AAATTTTTTATTTAAAAGAAAAAGATGAAGGATTAAATTACTA ACTTTATAGTATCTAGATA  
CATTT CAGAAAATTTGTGATATAGAAAAAAATTTTCTAAATGGAAGAGAGGTCATTGTTAT  
ATCATCTTAGCCGAGATTTGATTAAGACTTGGCTGAATCTAAATTTATTTTAGATAATAAAA  
AAAGTATGTGTCAGGTAAATTAAATGTTCAAAAAACTTACATATTTTAAAAATGTATTTAAA  
ATATGTTGTTAAAAATAACTTCGGTTATATCAAGATTATAGTTTATCTAAATTGATGAACAT  
GAGTTTTCATTTTCGATTTTACTTTTTGAAGAAAATATCGAATATTAAATCGAATATATCTAT  
TCAAGAAAAATTTAAATCAAGATAAATTGTTACA ACTTGAAATGCTGATTACGTTCAATTA  
AATGGATCATTGGATAATTGAAATATATTCGACAAGATTTTTTAAATTAATAACTTTATAAAT  
CTCTCCTAATTAGAAAAGAAATATAAATGTTCTTTTTTTTTTATTGAGAAATGATTTTAAATC  
TAATAAATAATGATCTGAAATTAATTCGAGTAAAATCTGTCTGACATACAACAATTGAAGA  
TTTTGAATGTAAAAAAATTGACGCAAAATTAATAATAGGATTTAATTTTTCATTA AAAAATT

TAATGATGAGTGTACATTTTCAGAACATATTTGAAAATATTTAAAAAAATATATATATATAA  
AATTGAAGTAATTTTCTTTGTAATAAAAAATAATATAAAGTGAATAGAATAATAGAAATAC  
AAATAGTAATCTATAACATCTGGCATAGTTCGAATTATTTAAAAATGATTATATTCTTCAAAA  
AACATAACCTTAAGTTAGTATTAAATCAATATTTAAAATACAAGTTTCAATTTGAATATAATT  
AAAAAACTATACTATCATAAAAAACATAGAAGAAAAACAAAGTTGATTATAATGTATTGT  
GAAAAAGAGAATCAACGTGGGATTTTATGGTATATCTACTACATTGATTCAAAGGAGACTC  
GATACGAGTCTTTCTAGGATTCAAAGATTATCAACGTAGGATTCAGAAGAAATTATCACAG  
GATTTTCAAGGATTTAAAGAAGACTATCAACGCGGGACTTCATGAAATTCAGAAGATCGA  
CTCAGGATTTTCGTGAGATTTCGAAAAGGTTACTGATGCGGGACTTCGTGGGATTCAAAAAA  
CTATCAACGCGGGACTTTGTGGGATTCTGAAGAAAGACTATCAACGTGGGACTTCGTGGGAT  
TCAAAGAAGACTATCAACGCCGGACTGTGGGATTCCAAGAAGACTATCAACGTGGGACTT  
CGTGGGATTCAAAGAAGAGTATCGACGTGGGACTTCGTGGGATTCAAAGAGGACTATCGA  
CGTGGGACTTCGTGGGATTCAAAGAAGACTATCGACGCGGGACTTCGTGGGATTCAAAGA  
AACTATCAACGCCGGACTGTGGGATTCAAAGAAGACTATCAACGTGGATCGAGGGATT  
CAAAGAAGACTATCAACGTGGGACTTCGTGGGATTCAAAGAAGACTATCAACATCGGACT  
GTGGGATTCAAAGAAGATTATCAACGTGGGACTTCGTGGGATTCAAAGAAGATTATGAAC  
GCAGAACTTTGTGGGATTCAAAGAAGATCATCAATACGGTTTAATGAAATTTTCATGATAAA  
TTATTAATGCGGGATTTTATAGGATTGTAGGAAAGCGCCTTCGTATTCAAAAAAAGACTTCG  
ATGAAATTTGTAATCCAAAAAACCGTCATTGCCAGATATCATGAAATTCAAAGGAATATT  
AAAAAAGATTTAATGAAATTTAAATATTAGCGAGATAAATTTTTAAAGATATAAAAAATT  
ATTGAAATTGGAATTAGAAACAAATCTCAAATTTCTGATATTTGAAACTTATTACCAAATAC  
AAGTGTGTTACTTAATGAATTTTCTAAAGAAAGGAT

182. >MSTRG.3571.1 Gene=MSTRG.3571

TAATTCTCATATTTTTACTTTCTGTTTTTTTTCACTATTAATTCTCAATTTAATTACTTTTTAG  
AATATAAATTCATATTATACGGTAAATTAATTCCTAGATAATTGATTATCTTATAATTTAAT  
TTAATATTTTATAAATTAAAAAAATCGTATCTAAATATAATTAAAAAAAAAAAAAACAATA  
ATTAGAAACGCGGTATAAAATAAAAAAAGACAATTAATAAATAAAGCAATCATTTTGGCTT  
CATAACATGAAAACAAGCCTTGTTTATTATAATTTATACTAGTATAAGAATTACTTATTGTG  
AGCATTAAATCATAATTATCGTTTAACATATATATTGTTATAATATTTATTATATCATTTTAT  
AATATTAAATTTGTTTTGTAATATTTAAATGCCTGCAACAACTCTACACAAATTTACGACAT  
TCATAGGATTGATATCAATATTACATACAGCATATTCAGCTGCTCAACATCGTTTCGTATTTA  
CGAATAACAGAACAAAGAATTCATTACTTTACCAATTGATATTTTAATACAAGGTATTATCAG  
TTTATTTTTGGTTATGTATGGAGTTATGTATATTGCTGGTGAATTTCAAAGAAATTCGAGCAGT  
TGTAGATTTAGAAAATAAATCTTGGGAAACATTGAGAAATCTTCCTTCATTTCAAATATTTA  
ATCATCGTGGAAGATCTTTATCACCTCAATACACCCAATAAAATATTTTTATTATTTATTCGT  
GGAAATGGACATATAATTAATCTTCTGCTTCTTTTTCCCTTTCAATTCAG

183. >MSTRG.3617.2 Gene=MSTRG.3617

CATTTTATCGTACAAAACCTTTGCATCACATTTGCTGCCTGTCCAAGTTTGGTAACTAAGGGTT  
GAAAAATTCTGATCATTATATAGATAGGTAAATATGAATCCCGAAAAATTGAAGAAGCTTC  
AAGCTCAAGTACGAATCGGCGGTAAAGGGAACACCCCGACGCAAGAAGAAGGTTGTACATG  
CTACTGCTGCTACGGATGATAAAAAATTACAAAGTTGTTTAAAAAAATTATCTGTGAATAC

AATTCCTGGTATAGAAGAGGTGTTACACAATTGAAACGACTAGCAAGTACAGTTTCTGGAA  
GTACAGTTGGTAAATCAACATTGGAAGAGGATGATGAAGTGCCAGATTTAGTGGAGAATTT  
TGATGAAGCTAGTAAAGAGGAGGTAATGAATCAGCCTAAATAACAATAATTGTTATATGA  
ATGATAATTTAAATTTTATATATTATGTATAGAAAACTACAGGAAAAAGAGTTAATATAA  
TGCATGTGTGTTATCATTAGGAATATAATTTTTCTTTTTGTGACTATAATTGTTTTCAATGGG  
TTAAGAAATATGAAAACACACGCGCGCGCGCACGCGCACACACACACGTA AAAAATTATAA  
ATATATATATATATATATATATATATATATATATA

184. >MSTRG.3621.3 Gene=MSTRG.3621

GATTATTCTCCAACCGTGATTCTCATTTCTAACCAATTATTACAAGATCTCTTCATTTTGTTT  
TGGAAAAGTCGAGCGTGATTAAATATCGTTTTCTAACACAATTTTAATAAAAAGTATTAAA  
AAAATTGAAGAAAAATGTTTGGTCCAGGAGCTGCTCCGATCGTAGTTTTAAGTATGTAGAA  
ACAATAACAATTTTGATTTTCATTTATTTGAGTAGTGAAGTGAGAAAATTCATGATGTCGTG  
CGCTTTGATTATTGCAGGTCAAAATACAAAACGGGATGTTGGCCGAAAAGTTCAGAGAGA  
AAATATACAAGCTGGAAAAGCAATTGCAGATGTCATTAGAACATGTCTAGGACCACAAGC  
AATGTTAAAAATGTTAATGGATCCAATGGGAGGTATAGTTATGACTAATGATGGAAATGCT  
ATATTACGTGAAATAACAGTACAACATCCTGCTGGGAAATCTATGATAGAAATAGCTAGAA  
CTCAAGATGAAGAAGTTGGAGATGGTACTACTTCAGTTATTGTATTGGCAGGAGAAATTCT  
AGCTACTGCTGAACCTTTCTTGAAC

185. >MSTRG.3671.1 Gene=MSTRG.3671

GCATCATGTTCTTCTAATAACAAAATCGAATTTTTGGGCAATACTTTTTCTTCGGTCGCCGGAA  
TTTCGACGTTTACACTTTTTTTTAAATATCTCCCTTATTGTTTCAAGTATTAAAAAATGTTTCA  
AATAAAAGTTGAATCGTTTCGAAAGGGCTATATCCCGACGCTCTCGTTTTTTTAGTAGTTG  
ACCAATAAAGAACTTTCAAGCACAACCTTTATTTTTTTTACCGATAACCTGTGTTTTTAATGC  
ACCAATCGATAGAGCGTAAAATTTGCTACAAAAAAGTATTAACCCACTTATAGCGAAAAA  
CCAATAGTTTGAAAGATATAGCAAAAATTAGAAATTTTTAGGAGGTCGACCTCCTATCGCA  
TCATGTTCTCCTAATAACAAAATCGAGTTTTTCGGACAAAAATTTTTCTTCGATCGCCGGAATTT  
CGACATTAATACTTTTTTTTAAATATCTCCTTTATTATTTCGGAATATTAAAAAATGTTTCAA  
TAAAAGTTGAATGGTTTCGAAAGGGCTATGTTCTGACGCTCTCATTTTTTTAGTCAGTTCACC  
AATAAAGAGCTTTTTAAGCACAACCTTTATTTTTTTTACCGATAACATGTATTTTTTAAAGCAC  
CAATCGATGGAGCATAAAATTTCTATAAAAAAGTATTAACCCACTTATAGCGAAAAACCA  
GTAGTTTAAAAGATATAGCAAAAATTAGAAATTTTTAGGAGGTCGACCTCCTGTGCGATCA  
TGTTCTCCTAATAACAAAATCGAGTTTTTCGGACAAAAATTTTTCTTCGATCGCCGGAATTTG  
ACATTAATACTTTTTTTTAAATATCTCCTTTATTATTTCGGAATATTAAAAAATGTTTCAAATA  
AAAGTTGAATGGTTTCGAAAGGGCTATGTTCTGACGCTCTCATTTTTTTAGTAGGTTACCA  
ATAAAGAGCTTTTTAAGCACAACCTTTATTTTTTTTACCGATAACATGTATTTTTTAAAGCACC  
AATCGATGGAGCATAAAATTTCTATAAAAAAGTATTAACCCACTTATAGCGAAAAACCA  
ATAGTTTAAAAGATATAGCAAAAATTAGAAATTTTTAGGAGGTCGACCTCCTGTGCGATCA  
TGTTCTCCTAATAACAAAATCGAGTTTTTCGGACAAAAATTTTTCTTCGATCGCCGGAATTTG  
ACATTAATACTTTTTTTTAAATATCTCCTTTATTATTTCGGAATATTAAAAAATGTTTCAAATA  
AAAGTTGAATGGTTTCGAAAGGGCTATATTCTATTTATTTGTTTTTT

186. >MSTRG.3673.2 Gene=MSTRG.3673

TCGATCGTGGAAGGATAGAAGAGAAAACAGTATCGATGTGTTTTCTGTGGTTGAATTCGC  
GTGTGCGACGACTCAACAAGAGAGTTTCGATCAGATTTTCGTTAAACGTTTCGTTTTTCGCGA  
GTGAGAAATTGTGTTGCGTGCGGAAAGAGGACATAATCGTAGAAGGATAAGTGAGAAAGA  
AAATGGGAAAAAAATGAGCAGCCTTTTCAATCTGTGACGTACCTACGACGGAGCGATGAA  
AACGGCATAGCAACGGCAATAGCTCGTCCCAACGTCCAACGGGCACGTATTATGTGAGGT  
GAAACTTGCAACGAGGGGAAACGAAGATGTCCGCCATCAGCGTGGCTGCATGGCTGCTCAG  
CGCCGTGCTTTTCGCCGCGATTAATAACGGTAAGTTTTCAAAGGATGGTTACACGCCTTGCT  
ACGTAAGTAAATATATCGAATATAATATTGGAAGAATAAAATTCATAAAAAGTTTTTGAAAG  
AGAGTTTTTTTTTAATTCTTTTGCGATGATCCAAATATTTGCAATATAAAAATTAACAAAAA  
TCAAAGTTAATCAAATATGATAAGTTTACAGCTCAGGATACTGCATTTTAAACAATTTATAG  
GATAATTGAACGACTCGAAAATTTATCTTCACGATCTAATAAAAACTTAATGCGATAGGAA  
TACGATAAAA

187. >MSTRG.3673.3 Gene=MSTRG.3673

GATGGTTCACCGGACGACCGTCGTTGGGGCGCTGCAACCCGTCAGGACGTCAGTTTGCTGT  
CGTACCGCGACACGGTCGGATCTTATTTTCGTAATCATCACGTACACGTACGTACACGTATAC  
ACGCGCGTGAGAATTATTAGTAAGAATTATTTGTTTCGGAATCGTAACGGTTTTCTCGTGAT  
AAATAATCGATAATAAACGGGTATTTAACGTGAAATGACACTAATCACGTGATCGGTGATT  
CGCGATACGAAGTGAGAAAGGATCGTTTAATCTCTAGTTTCGAACGTTTTTTTGTTCGCGAT  
TGAACACGTTTCGTTGAATTTTATGTGCAAGTGTTTCGTGTTAACTCGCTTAAATTCTGTGTATA  
TGAGGTCCAGTTAAGTTTCGTGTCTTCGTAAAAATAAAATATATACGATTCAAGGACGTATG  
CTCTCGAGTGTTACAAGAGAGAGCACAGTGTTAAAAATAATATATATTGAAACTTGGAAGG  
TTAAGTGATACGTTTGTGACATCTATAACATTGTTGGAGAATGTTATTACGTGGAAATTCG  
TGGAATAATAATCATTAGAACGCATATTCACAAGCAATATTTGATTGAGGAGAAAGATTTG  
AATTTTTGTTTCGCGTTTTATCCACCGTAGCGTTGTGGGCGATCGAGAATCGAAAGTGCCT  
GCAATCGATCTATCGATAGAATCGAAAGTTGAAATGTTTCGCGAAAGAACGTGCAATATGC  
GAAACACGAGTGACAGTTAATCGAGGCATGTACGCGTAACCGTCATGGGTGCTTATCGAA  
AGAGTTTCAATTAATTTCTCGTGAGGAAGGTCAAGTGCGCTGTTCAAGTTTTCAGTTTAAATT  
AAAATACCCCTGAGATTCTCTATTGTCGTGCTTGTGTCTAAAATTAATTAACGACGGGTA  
GACAACGGGCAGGAGAAGGCGAATAAGCAAGATTATGACAAAGTGCGAAGAAGGTAATA  
ACATAACCTATAAAAAATCAATGACCATCGTGCGACAATAGAATTGACGGGAGTGTTTTCC  
GTTTGAACGATTTCGATATATCGATCGTGGAAGGATAGAAGAGAAAACAGTATCGATGTG  
TTTTCTGTGGTTGAATTCGCGTGTCGACGACTCAACAAGAGAGTTCGATCAGATTTTCGTT  
AAACGTTTCGTTTTTTCGCGAGTGAGAAATTGTGTTGCGTGCGGAAAGAGGACATAATCGTA  
GAAGGATAAGTGAGAAAGAAAATGGGAAAAAAATGAGCAGCCTTTTCAATCTGTGACGTA  
CCTACGACGGAGCGATGAAAACGGCATAGCAACGGCAATAGCTCGTCCCAACGTCCAACG  
GGCACGTATTATGTGAGGTGAACTTGCAACGAGGGAAACGAAGATGTCCGCCATCAGCG  
TGGCTGCATGGCTGCTCAGCGCCGTCGCTTTCGCCGCGATTAATAACGGTAAGTCGGTGAA  
CAAGCAGTCGGGACTTTTGACAAAGTTTCCTCGACGGGTCTAACCAGGGTCCAAGCAA  
GTGAGTAACGATCGGATTAATATTAAAGCGATATTACCTCGTTTATTCGAGATTTTGGTTCG  
AATAAAGTCCAAGTTTGGAACCTTGTTCAACCGAAGACGGATTTAACTTTTCAATTACATTA  
ATTCGCGTTAGATACATAATTCCTT

188. >MSTRG.3687.1 Gene=MSTRG.3687

CATTAAGTTGTTGGCAACCCCTGAAGTTTCCCAGGGGGAAGGGTTAGTAAAAATGGAGTGTT  
ATACGGTACAACGTGTCTTCATTATTGAACAATATTTTAAAAATAATTAAAGTTTGGTGGCC  
GCAAATAAGCGATGAAGCACATTTTCACTTCGATGATTTTGTTAATCGCCAAAATTGCCGT  
GTTTGGGGTTCGGGGAATTCACATGTGATTAGCGAAAAACAAATGCACCTACAACGTGTCA  
CTGTTTGGTATGCATTTTGGACAACAGGCATCATTGGATTATACTTTTTTGAGAATAAGGCT  
GAGCAAGCAGCAACTATTAATGGTGCTCGATATGGCGACATGATAATACAGTTCTTTCTAC  
CGAAATTGAGTGATATTGATATGGCCAATATATGATTTCAACAAAACGATGCCACATGCCA  
TACAGCCAATAAAACAATTCAATTACTGCATGAGATATTTCTAGTCATGCACTTTCGTTTC  
GGTGATCAAAATTATCCCCCTAGATCATGTGATTTAACACCATTAAATTTCTTCTTATGAAG  
TTATTTGAAGTCAAAGATCTGTCAACAATCTCACAACCACACGTGCATTACAAGAGGAAAT  
TAAATGTTGCATCAACGAAATTCAGCCACAATTATGCAGAAAGGTCATGAAAAATTTCAAC  
GAAAGGGACTTAGTATTTAGCAAATTATTACACATTATATATAATTCCTATTTTTTATATAAT  
TAATTACATATAACTATTTATATTTTCATATTTATTCTGATATATGTATAATTATACATTATGCA  
TATAATTA AAAAGAGCTTTGCAAAGAGTTTTTGTGGCAGTTTCTAAAATTTCTTTTTTATGAA  
AACTTATACTAAGTCGTAGAAAATTATTAGATTTTTCTAAATATGAAAAACGTATCCCTGGT  
ATGGCAGATACTTTAAATGTTTCTTGACACC

189. >MSTRG.3697.1 Gene=MSTRG.3697

CTTTTTTATAGGAAATTTTATGCTCCATCGACTGGTGCATTAAAAAATACACGTTATCAGTA  
AAAAAAATAAATTTAAGCTTGAAAGTTTTTTATTGGTCAACCTACTAAAAAAATGAGAGCG  
CCAGACTATAGCTCTTTCGAAACCATTCAACTTTTATTTGAAACATTTTTTAATATTCTGAAT  
AATAAACGAGATATTTAAAAAAAGGTATTACTGCCGAAAATCCCGGGACCGAAGAAAAAT  
TTTTGGCCAAAACCTCGATTTTGTATTAGGAGAACATGATACGAGAGGAGGTCTACCTCCT  
GATAATTTTTAATTTTTGCTATATCTCTTAAACTAATGGTTTTTTGCTATAAGTGGGTTAATAC  
TTTTTTGTAGCAAATTTAACGCTCCATCGATTGGTGCATTAAAAAATACACGTTATCAGTAA  
AAAAAATAAATTTGAGCTTGAAAGTTTTTTATTGGTCAACCTACTAAAAAAATGAGAGCGC  
CAGACTATAGCCCTTTCGAAACCATTCAACTTTTATTTGAAACATTTTTTAATATTCTGAATA  
ATAAACGAGATATTTAAAAAAAGGTATTACTGCCGAAAATCCCGGGACCGAAGAAAAAT  
TTTGGCCAAAACCTCGATTTTGTATTAGGAGAACATGATACGAGAGGAGGTCTACCTCCTG  
ATAATTTTTAATTTTTGCTATATCT

190. >MSTRG.3703.1 Gene=MSTRG.3703

ATTAGCTAATACATATATATATATAATAATATAGAGAGATTTTAACGATATATGTTTCCT  
TTCGCCGCTTCAAAGAATAGACATATTCAGGAAGAAATTAAAAGTTTCCAAATTTAGCATC  
TTGAGAAATTAAGATGAAAAATCCTAAAGCAGAACTTTTACTTGTTTCATTGTTGGAGATG  
GACTTTATATCAGAGTTAAAATTGTTGTAAAACATATTCAATTTTTTCGGCACGTTATTGAAC  
GCTTTCAAATCCACGATTTGTTCCTCGTTGAGAAAGTTCAATATTGCGTAAAGAGATCCATT  
ATCTTCGGTTTCCCTAGAGAATGCGAAAACATTGTCGTTTCAGCATCCTCGTATTTAAATTGG  
CCTCTTTAAAGTATGGCGATTTTTTCAGCGACGCAAATTTCTTGAACATATTGAAGAACGAG  
TTCTTGTCCTTCTTTTCAGCAGCTAGATTGACAGTCTTGTAATTTTCGTTGACACGAAGCCAG  
GTATTAGAGCTTGAGGAAAATCCAGCAGAACTGAGTCGTCCCATTTGGAATGGCGTTCTCG

CGGGATCTCTCGACATCGTTTGATAGTTTTCTTTACCGGCGCCGCATCCCTGCGGATCCTGC  
GTATCCTCCCACGAGATATAAGTATCCGACATACCAATTTTCATCACCGTAGTAATTCACGGC  
AACACCTGGCAGCAAAAGCGACATCGTGGTGATCATACGGGCCTTCTCCTCTCCAAATCTC  
GACACCAATCTCAATTGATCGTGATTTCCGGGCACCCAGTTAGGAATACCACTGGTGGA  
TGTACGTCATCCAATTATCGACCAATTTTTTTGAAGTCTGATGAATTTGAATCCCTAGAAACA  
TTCTTGATGAATGCAAAATTGAAGGGAAAATCTGCTCCGTAATCGTAATATTTTCATCGTCAT  
CGATAAATTCGTGTATGCCTCGATAAGCATGTGTTTTGGTTGCGGGAATTCGTCTAACACAT  
CTCTAAATTTGCGAACTACATTGTAGGTTTCTGGGATATCGTGAGTGAGATCTTGAGAGTG  
TACTCGGTTTTATTGGGATCATTGTGTTTACCTGATAGAGGTTTCGTCTAAGAATCGCATGTCT  
TCGCAAATGTAAGGCAGAGCATCTACTCTGAAACCATCAAATCCCCTTCTCAGCCAGAATC  
TGAGAACATTTTGCATATCATCCAGTACAACCTGGATTATAGTAATTTAGATCTGGTTGTTCT  
GGTGCAAATTGATGCAGATAATATGCCTGTCGTTCTTCCCGCCACGACCAAGCTGATCCAC  
CAAACACGCCTACCCAATTAGTTGGTGGAACACGTTTGCCATTTACAATTTTTCTGGATGC  
CAAATGTAATAGTTGTTATAAGGTTCAATGTTTTTCAAACCTCAACTGGAACCATTCGTGTTG  
ATCAGATGTATGATTCGGGACGAAATCCAAGATTATCTTCAATCCTTTCTCATGTGCAGCAC  
TGACTAGATTATCTAAGTCTGATATGGTGCCAAATATGGGATGAACGTCGGTGTAATTCGA  
AATGTGCTAACCAAAATCGACCATAGGGCTTGATAAATAGGGGATAACCAAAACATGTC  
GACCCCCATTTGAGAAAAATGATCCAATTTTTCTTTAATACCTTCGATATCACCAATACCAT  
CTCCATTGCTATCCTTGAAGCTTCTCGGGTAGACCTGATACACGATCAAGTCCTCCTTCAAG  
TTTTCAGGGAGCGGCTTCCATGCTGCGTCCACAATGGACAATGCCATAAGGCAAAATACGA  
TACTGCCTTCATGCCTGTTTAACACACAAAACGGATCGTTGCATCTCCGCCGGATCGAAGA  
GCCACAAGAGACGATATTGCAGTGTCTCACCTGGTGATCTCCGAACGTTAATGCAACTA  
CGAGCTGCACTGGTACAACATCGTCTCGATTGCACAATCCTTCCTCG  
CCAGGTCGAAATGGCCAGCTATCGAAACAAGGTACATTAACGATAGTACGCCGGAGTTCT  
GGCAAGAATAAGAGCATTGGCGGAAGTTTCGAAAAGTTCTCCGCCCCCGCACAGTCCTGAC  
ACTCTTTCGTCAAGTCAATCCGTGGATCTCGACGAGATCCTTGATAATGTCGATCTAACGAC  
AGACTCGCTTCCTGCCGTTGACACCCCCGACGCTTGCGACAAAGCTGCTCTCAGATTGAGA  
TGTTTACTGAGGCAGCTTCAACATGGCGAAATATCAGCAGAATTACTTCAACGAAATTTAC  
ACTACGCGGCACGTGTACTCGAAGCTGTCTTCTCGATGAAACCAAGGTGAATTCAGGAGG  
GGTTGAGTGCTCTCGGTCATCGCGTAGGGGTACGGGCCTGTCATCTGCATCCCTTGGGAGCG  
CCTTGGACTCGGATGGACAACAGGGCCACGCGGTGGTAACCCAGAAACGGAAGCT

191. >MSTRG.3716.2 Gene=MSTRG.3716

ACTCAGAATAAAATATTTTATGAAAGACGCAAGCGCTATGATATTAAATTCTTTAATTTATT  
TGATAAGAATATTTCTTATAGTTATAAATCTTACTTTATGTAAAAATAGCAGATCGCGAATG  
GAGATAAATAAGAATAAATCAAGAGTAGATTTTTCCGGGAATGTAATTGAAAGCGCCGCG  
TGTTTAGTTGCAGCACTATTGAAATTGGGCTTTGATCTTGATTGGATATAAACCAGCAGAGA  
TCTGTAAGCGAGGATCCACTAAGAATGGCTGCCGTTTTGAGAAGATTCAGTGCCGCGCAGA  
TCACGGTGATCAGCAAACTAACTACCGTCATTTATTATCAGCCGGTAGGCGATCAAGAT  
TCAAAAACCTTGAGGAGCCCTTCTTTTTTTCATATGTTTCGTACATAGACTACGAGCTAGTCTC  
TAAACAGCGGCTTTTTAGGGCAATAGCCACATCGTATGTGTTGTAGATCTTTTGCAAGGTCA  
TCGATCCGACAGGATATCAGCGAAGGATGGATAAACAAGCTTTCGTAAGAAAAATCGAG  
CCAACAAAAGAGTCTCATTCAAGGATGCTATCAGATAAAGGAGTTATTTACGCTTTGCATA



CGCACAATATTCGACCTGATTCTATTGATAACTATTTAACTAATTATGAAGAGATTGTTAAC  
ATTATAAACTCCAAGAAGTCTGAATTGAAATTGGAAGTAGTTGGTTCATGGACTGTCGTAG  
CTGGTGATATCGATCAAGCTTTACATCTATGGCAATATTCTGGTGGTTATGATAGCGTTGAT  
CATACACAAATTGAATTGTCTAAAGACAAAGCATATCAACAATTATTCAAAGAAAATGGC  
AATTATTTACGATCACGTTATTTACAGTATTTGTTAGCATTTAGTTATTGGCCTCCTCTTACA  
AAACGAAATGATTCAAATATATATGAAATACGCAGTTATAGGCTACAACCTGGTACTATGA  
TAGAATGGGGCAACAATTGGGCAAAGGCTATAAATTATAGACGTAACAATAATGAACCTT  
TTGCTGGTTTTTTTTTACAAATTGGTAGATTATATAATGTTTCATCATATTTGGTGTATAAAA  
ATCTTCAAGCGCGAATGGAACTCGTGAGAGTGCATGGAGACTTCCAGGATGGGACGAAT  
GTGTTGCATATACTGTACCATTAAATTAGAGAAACACATTCCCGTATATTGAGTCCAAGTAGC  
TTTTACCAACA

192. >MSTRG.3749.1 Gene=MSTRG.3749

AGTTGCTCCAATCCCACGAAGATTTTTCGGTAAATCTTTGTATGACGCTTCTTGTCATGTTTG  
AATTATTCGAAAGTTTTTTCATGTATTATATTATTTTTGTGAGTTAAACTTTATCATTAAAA  
CGAATTATTCAGTGTGAATTTGTATTGTGTTTGTTAACACAAATAATTATAAAGGATTGGTT  
GAAATAAAAATAATATCGTTTAAACATACCATGGACGCATTCACTCAACGAATGTTGGAGCG  
AGCAAAGTCAAGAAGAGAAAAATTAGATATTAAATTATCAAATGCTGGACATGATGTAAA  
AAAAAGACGTAGTCCTTTGAAGGATGCAAATGCTATTTTAGCTCAAGCT

193. >MSTRG.3803.1 Gene=MSTRG.3803

ATTCGACTAATCGCATTGGGTGTTTCGACCACGCTTTCCGCTCTTCGTCTCCTTGTTACTTG  
TGGACATATTTACGTTCTTTTTCGAATTCTTATTATTTTGTGATTACGAAAATGATGTGCTAG  
CTTTAGAATTTACGTATTTATTGTAATTATATTAATAACATTTGTTGGATATATAAAATCTC  
TGCGCATCGATACTTTCGTGAAACGTCAACCTAACCCTCAATAAGTGCAGGAACGAATCTG  
AAATTCCATTATGATATATAAGGTTTTCTCCAGGACGGCCGAAAGAGGCAGTGGAGACAG  
GGATGGACGATAAACTAAAATAATCTATTGCTACTCTTGTAATAATTTGAAGATTTGATT  
AATTGGAGATTTGATTATCGAAATTACCA

194. >MSTRG.3801.2 Gene=MSTRG.3801

GAGAGGCACACACAGAACCGAAACGCTATTGCGCGAAACAATTTCCCTCCGTTTCTTGCTAC  
GATTCTGTTTCACGCATAGTTCCGGCCGTTTCCCCGCGTGCTTTTGTTTTATTCGAAAGCAAA  
AGAAAAAAAAAAGAAAACATAAGAATCGTGCGTGTTAAATATGTACGTGTGAAAATATTG  
TACGAAGAAAAAAAAATTATAAAGATGCTACTCAGAACATGAAAAAAAAAACAAGAAGAG  
GTTAGAATGGAACTTGTGAGTGTGATGAAAATACAATTAATATGTAAAAAGAATGATGAT  
GAGTTCTCTTTGTCGAACGAAGAGAAAAAAAAAGCACAAATGAAATAAAAAGATAAAAAGGC  
ACGTAAGGAAAAATAGAAAAGGATCGCACAGGTGAATAGGCGTTAGAAAATAAAACAGG  
AGTGCCAAAATCATCCGTGACTTCCGTCCCCTTGGGCAATAACAAGTACAGCAACTTGGC  
GAGAATACAAATGTTTGCCATTTGTCTCCAATAATCGTAAGGATTCTTAATCTGTCCGTTA  
TATCGATCCTTTTTTTGTATTGTACTCGAAAAATGATCAATATATCCATTTTACCAAGATTT  
TTTGATCGAAAATATCGTGATCATATATTAGTAATAAAAACAAAAACAATAAATACTAAT  
CATTGAAAAATAGAAAGAAAAAAGAAAAGATTATTTGAAACATAATTTTACAACAAAGAT  
CGTTACTTTTCGAGCAATTGATACAAATAATCGATCTGAATAAAATAATATTGACACTCGCTA

TTAGTGCCTGTCGTTTCGTCGATTTCAGGACAGAGTATTTTCGTCGAGAAACCTCTAATTCCATT  
 CGTCGAACTGACTAAAATGAGGTTGTATCCGATTCTCCATTTATATATTATGGATGTTGTTTA  
 TAAAAATAATAGATTGGCCGTAATTAATTTTGACGGCTAATTAACTATAAAAAAAAAAAT  
 ATTTATTCAGACGACTTGCCAGTTTCGTTGCACAGTATACACGATGTAGGTTTCGAGCGAAAT  
 AAAAAAAAAACATATAAAAAAATAAATCATAATAATAATGGAAAGAAATTTAGAGATTAT  
 GGATTAAATGGATGAGTTGCATTAGTTATTTGAGAAGTTTCATTGAGAAGAAATATCGATGT  
 ATATATTTTAAGTTTGTATTATAATGCCCCACTTAATTTGTATGAAATGGAGAATTTCAAAT  
 ATTAAATGATAAAAAAAATCTTTGTTCTTTTTTTTATTTTCCTATTTTATAATTTTTGTGCG  
 TCAAATGTTATATATCCCC

195. >MSTRG.3801.3 Gene=MSTRG.3801

GAGAGGCACACACAGAACCGAAACGCTATTGCGCGAAACAATTTCTCCGTTTCTTGCTAC  
 GATTCTGTTTCACGCATAGTTCCGGCCGTTTCCCCGCGTGCTTTTGTATTTCGAAAGCAAA  
 AGAAAAAAAAAGAAAACATAAGAATCGTGCGTGTTAAATATGTACGTGTGAAAATATTG  
 TACGAAGAAAAAAATTATAAAGATGCTACTCAGAACATGAAAAAAAAACAAGAAGAG  
 GTTAGAATGGAACTTGTGAGTGTGATGAAAATACAATTAATATGTAAAAAGAATGATGAT  
 GAGTTCTCTTTGTCGAACGAAGAGAAAAAAGCAATATAAACGGAGTATGTATAAAATGT  
 ATTTTAAGTCTGGACAAAAAATCAATTTACACTTACAATTTACAGTAACGAGTAACAATA  
 ACTGATGTGGGTTGTGCATAAGAAAACAAAAACAAAAAGAAAAAAAAAATGAAAAGCGTA  
 TATATACGGTAAACATGACGATTCGTGATAATGGAGAATCGGATCGACTCAACGATCGAAT  
 TCGCGACGTGCTGCGTGTAGAAAACAAGTTTTCGTCCCAGTGCGGATTCACCTCTTTCCTGG  
 CTGTTCTTTTTATTTTGTGTTTGTGCATATTCTGCTTATATAATTAAATTATGTGGTTCTCAGTGT  
 AGTTAATTGTATTCCATTTCGTATTCCGTTCCGTAAACTTGCAT

196. >MSTRG.3813.1 Gene=MSTRG.3813

AAATAAAATTGAGATAGTTAAGCTTTTTATAAGTCCACAAAAAATTAAGGGCGCCAGGATG  
 TACCTCTTTTAAAACCATTCAACTTTTATTTGAAACATTTTTTAATATTCTGAATAATAAGCG  
 AGATATTTAACAAAAAGTATTTCTGAAATTCCCGCGACCGAAGAAAAATTTTGTCCAAAA  
 ATTCGATTTTGTATTAGGAGAACATGACACGATAGGAGGTGACCTCCTAAAAATTTTAAAT  
 TTTTGCTATATCTTTTAACTATTGGTTTTTCGATATAAGTGTGTTAATACTTTTTTATAGGAA  
 ATTTTACGCTCCATCGATTGGTGCTTTATAAAATACACGTTATCAGTAAAAAAATAAAGTT  
 TTGCTTGAAAAGTTGTTTATCCGTCAACCTAGTAAAAAATGAGAACGCCAGAATATAGCC  
 CTTTCGAAACCATTCAACTTTTATTTGAAACATTTTTTAATATTCTGAATAATAAGCGAGATA  
 TTTAACAAAAAGTATTTCTGAAATTCCCGCGACCGGAGAAAAATTTTGTCCAAAAATTCG  
 ATTTTGTATTAGGAGAACATGACACGATAGGAGGTGACCTCCTAAAAATTTTAAATTTTGT  
 CTATATCTTTTAACTATTGGTTTTTCGATATAAGTGTGTTAATACTTTTTTATAGGAAATTT  
 ACGCTCCATCGATTGGTGCTTTAAAAAATACACGTTATCAGTAAAAAAATAAAGTTTTGC  
 TTGAAAAGTTGTTTATCCGTCAACCTAGTAAAAAATGAGAACGCCAGAATATAGCCCTTT  
 CGAAACCATTCAACTTTTATTTGAAACATTTTTTAATATTCTGAATAATAAGCGAGATATT  
 AAGAAAAAGTATTTCTGAAATTCCCGCGACCGAAGAAAAATTTTGTCCAAAAATTCGATT  
 TTGTATTAGGAGAACATGACACGATAGGAGGTGACCTCCTAAAAATTTTAAATTTTGTCTAT  
 ATCTTTTAACTATTGGTTTTTCGATATAAGTGTGTTAATACTTTTTTATAGGAAATTTTACGC  
 TCCATCGATTGGTGCTTTAAAAAATACACGTTATCAGTAAAAAAATAAAGTTTTGCTTGAC

AAGTTGCTTATCCGTCAACGTAGTAAAAAATGAGAACGCCAGAATATAGCCCTTTCGAAA  
CCATTCAACTTTTATTTGAAATATTTTTTAATATTCTGAATAATAAGCGAGATATTTAACAAA  
AAGTATTTCTGGAATCCCGCGACCGAAGAAAAATTTTGTCCAAAAATTCGATT

197. >MSTRG.3825.1 Gene=MSTRG.3825

AGACAAAGGACACGACGAGGCGGGAAAACGCCTCTCTCTTCTTGAGAAAAATTCGTCCAG  
AATTCGTGCAGAAGCAAGGACGCTTTTTTAAAGGCGATGGATTGTATTACGACGACGATGA  
GCGAAGGAAGGAATGCGTGAGATTTGTTCAACAAATGGGAAGCTTGTGTGCAACAGCTTT  
TTGCCCCGCGCAAGAAAAAGCCAGGATATGTACGGATCGAACCAGAACTCCATTGTTTTTTG  
AAAACGGATTGGAACCGGTGCTGCTCCAAGTAATTCGTGACGAATCCCTCTTTGTGTACCG  
GATAGGTATACAGATTCAATTGTGCCCGGTTGACAGACGAAATTGGCCAACCTGAGATCTC  
CTCCGGATCCGGTGCGCTCTCTTTTTACG

198. >MSTRG.3891.1 Gene=MSTRG.3891

ATTCGGAGAACATGATATGACAGGAGGTGACCTCCTAAAAATTTTTAATTTTTGCTATATC  
TTTTAACTAATGGTTTTTTCGTATAAGTGGGTAAATACTTTTTTATAGGAAATTTATGCTC  
CATCGATTGGTGCTTTAAAAAATACATGTTATCAGTAAAAAAAATAAAGTTGTGCTTGAAA  
AGCTCTTTATTGGTCAACCTACTAAAAAAATGAGAGCGTCAGAATATAGCCCTTTCGAAAC  
CATTCAACTTTTATTTGAAACATTTTTTAATATTCTGAATAATAAACGAGATATTTAACAAA  
AAGTATTAATGTGCGAAATCCCGCGACCGAAGGAAAAATTTTGACCAAAAACCTCGATTTTG  
TATTAGGAGAACATGATATGACAG

199. >MSTRG.3902.1 Gene=MSTRG.3902

ACACCGGTCCGTACAGGATATTTCTGTCGGCGCGTCAGTGCTGCAGTCGACAGTTTTTCCTTT  
TTTCTGTGCAACATAATGTGACAATCGGAACGCACGCGTCAGTTCGTGATCAATATCGATTC  
TCGCGGGATTAAACGTAGATAAATAAGTCGCAAGTGTCGATGTTTTCGGTTATTGTACTCGT  
CGAACGCGTTACCACGTGATTTTTCTCTGTCAAGTTTGAACACGGAAAGAACCGTGTTACTT  
GCGTGCGAATATCGTCGAAGTGAGTGTTTGATAATAATTTTCGGAGTGATCGTGAAATAT  
ATACGATGCATCCGTTGCGGTGAGAACGGAGGGAAAAAAGAATTTGAGCGGGAGTGCCCTC  
GTAACCATTTTGTAAAGTTTCGTGTATCAGCCGCCGTCTCTGTGTGTGTCGAGCTGCAGCG  
TCCCTCGCGGCCCGGTCAAGAGAGACAAGGAAGAAAAAGGAGCAAGGTTGCTGGTGCGG  
CGATTGACGGATAGTGGCGATCGAGCGGGGAGAACGGCGACCACTTGTATGGCAGGTAA  
GATCTTTTCTCAGACTGATGAGAGACAGTTCTCTTTGAGTTTGGATTTGGATTGTGCGTGCTT  
CTTGTCTCATGTAAGTGTAATATATATAAATTGTTTTATCGCAATTATACTATTTGCATGGAA  
TTGTAGGAGAATGTAGAAAATTGTTTCCTGTAATTTATAGTTTTTTACATTTTGAAAATGATG  
ATGATCTTTTAAATAACAAAAGTAAAGATACGATTATTGTTTCATATTGTACGTG

200. >MSTRG.3951.3 Gene=MSTRG.3951

ATTTCTTCTATTAATTATTACGTATCGAAATATTATTAGCAAATACGCATGCGCAACTGTTAT  
ATAATGATTATAGATATATAAGTAATTCTGCACTAAAGCATGATAATTTAATTTTTAGCATG  
GTTTAAGGAGTTCCTTACATAATGTAAAAAATGTCAAAGGGTCTTGTTATTATTTTGCC  
CTGTGGTTGGAGTATAGCTATGGCAGCAGCACCAGGTGCCCTACCAGATTTTCAACTTTTAA  
GTCTTTTTTGAATAGGAGCATTTCATTATGCGTGAGCAGGATGTATTATAAATGATATGTGG  
GATCAAGATATTGATGGAATGGTAGCCAGAACAAAAGATAGACCATTTGGTTACTAGAGAA

ATTTACCTCTACAATCATTGATTTTCCTTGAAGCCAATTAACTTTGGGATTGCTTATATTG  
 TTGCAATTAAATCTTTATAGTATTATATTGGGAGCAAGTTCAGTCTTAGTAATAATATAT  
 CCTGTTATGAAAAGAATAACATATTGGCCTCAATTAATTCTTGGGATGACTTTTAATTGGGG  
 TGCACTTTTGGGTTGGTCTGCTGTGGAAGGATCGTGTAATTGGTCTGTATGCTTGCCACTTTA  
 TACTGCTGGAATTTGTTGGACACTTTTATATGATACTATATATGCACATCAGGATAAAAATGG  
 ATGATGTTATAATAGGTATAAAATCAACAGCTTTAAAGTTTGGAGACAAAAGCAAAATTTA  
 TTTATCTGGATTTAGTACAGTCATGATAACAGGACTAATTGCATCAGGTATATTAGCTGCAC  
 AGACTTGGCCATATTACACAGCAGTAGGATTAGTTGGTACTCATCTTGTTAATCAGATATAT  
 AATTTGAACATCAACAATCCTGCAGATTGTGCCAAAAAATTCATCTCTAATCACAGGATAG  
 GAATGATTCTTTTTACAGGAATTATTTTAGGAAATCTTATTAAAGTTTCTAAAAAAGATAGC  
 GATATTGTACAAGAATCAGAAAAAAAATCTATTCTCATTA

201. >MSTRG.3974.1 Gene=MSTRG.3974

CTCGAGGTATAATCAACAGGTACAAACGCGATGTTTCATCATCACATTATATCGTACCTTCT  
 TTAATCCTTTATTGGTCCATATTTGTCGTTGACATTTTATAATGGCCGAATTCATCGACGAC  
 GCCATCTGGATCTTCATTAAAAAACTAGAACGCTTTTAACATCGTTATTAAGCCGACCAGCC  
 AGAATATCCCTTGTCTTGAATCCTGGTGAACCATTTGCGATAATTAATCAGGTCCTGTC  
 CAATTCGTATCATTATCATCGAGACATTCGAATTCACAGCATCGTTCGCCGACCCGAACTT  
 CTTGCATCTGTAAGGTGGTGTGCAGAAGATGGATTGACACCACATTGGTTCCGAATGATAA  
 CAGACGCAGAGACTGCAAACCGCAGGTCCTGGTACATAAAGGAGACCGTGTGCAACTATC  
 GCTCCTTGGAATCCGTGCAATTCTCCTCCAAGGCAGCGTCTCGAGGGAAGGAGAAGA  
 AGAAGAATAGCGGGCAGATAGAATACCCACACGAGTATTTTCGAGTAGAGGCTCGAACTG  
 CTCTTCATGGTTCTCGATTGAGTTAGCCACAGAAGATCAAAGAATGATGTCCACCAGGGAG  
 GCTAGATAGATGAAAAGTAGTTATTCCAACAACCACTGTGCATGCACTGCAGCGGCCAGG  
 AGTATGTTATCTCGAAAGTGCATCACGTCGATGTCTCGATCGTTCCTCATGTATCGCAGTCC  
 ATGTGTCCGAACAATATTCTCTTCAAATAACAAAGATCGAAGTAAACAATTCTCTTTTAA  
 CGGACGAAATCGGATATGAGAAAAATGATAAAAGAGACAATAATCATACGATAAAAAGT  
 GCGGATACTAAGTAGGCCGTTTTTCGGAAGAAGATTCACGAATAAGAAGCAAAAGATCAA  
 AGACCGACGCGACCATATGCCGTTGACGGGCAAACAGCGACTAACCGAAATGAACTCTGT  
 CGCAGTGTGAGCACGGGTTGCGTTCGCGGGTTCG

202. >MSTRG.3990.1 Gene=MSTRG.3990

GGAATTTGAAGGGGATTTTAAAAATTCGTTTTTTTCGTGCGTTCGACTGGTCGATTGGGCG  
 ATCTATTGATGCGCAATTGGGATGAGCTTCTCGCTGTGCCAATCGCCGAAGCGGAGCCT  
 CGACGGTGAGCACGCCATCTTTGCTCAACGAAGACTTGATACTTTCGGGATTGGTTCCTTG  
 GGCAGCAGGAATTCGCGATTGTACTCTCTGTACACCGATTTACTCTCTGTCTTCTCTTCGTGT  
 TTTGCATGGACCAATAGTTTGTGTCCACGGTCTTGACAACGATCTCCTCAGGCGTGTACTG  
 GGAGACGTGGAACGAAGTTTCAGGCATTTGCTGTCCCCTTCGTCCTGAATGAGCGGGCTG  
 TTCAACCCGTCGAGCCACGCCGAGTCGTGTGGGGGGCTGAGAGAACTGTTTGTAGTGCTCT  
 GCGTTGTGGTGTGTTAGTACTCTTAAAGAAGTTGTTGCTTTTCGCGATTCATCAATTCGCTTC  
 TGAATCGTGACATCTCGTCTCCATCTTTCTCATCTCGGCGTCGAAGCGTTCCCGTATGTTGG  
 AAAATTCGGTGTCTATTACGCTGAAGTCACCGAGCTTGATAGGAATATTACGCTTGATACC  
 ACTGTCAGCCATGATTTTTCTATAAGTCACACTTGTGTTTCCTT

203. >MSTRG.3990.2 Gene=MSTRG.3990

GGAATTTTCGAAGGGGATTTTAAAAATTCGTTTTTTTCGTGCGTTCGACTGGTTCGATTGGGCG  
ATCTATTGATGCGCAATTGGGATGAGCTTCTCGCTGTGCCAATCGCCGGAAGCGGAGCCT  
CGACGGTGAGCACGCCATCTTTGCTCAACGAAGACTTGATACTTTCGGGATTGGTTCCTTG  
GGCAGCAGGAATTCGCGATTGTACTCTCTGTACACCGATTACTCTCTGTCTTCTCTTCGTGT  
TTTGCATGGACCAATAGTTTGTGTGTCACGGTCTTGACAACGATCTCCTCAGGCGTGTACTG  
GGAGACGTGCAAACGAAGTTTCAGGCATTTGCTGTCCCCTTCGTCCTGAATGAGCGGGCTG  
TTCAACCCGTCGAGCCACGCCGAGTCGTGTGGGGGGCTGAGAGAACTGTTTTGAGTGCTCT  
GCGTTGTGGTGCTTTTGAAGCTGTGAACGCGGACCGCGTTGGCGGTGCTGCAGGATCGAC  
CTTGTCCCAACCTTCGCTCTTCGAGGTCGTGAGGTACGGTGTTTCGCTGGTGTCTGTGTAT  
GTCGACTGGTAGTACTCTTAAAGAAGTTGTTGCTTTCGCGATTCAATTCGCTTCTGAATC  
GTGACATCTCGTCCTCCATCTTCTCATCTCGGCGTCGAAGCGTCCCGTATGTTGAAAA

204. >MSTRG.4038.1 Gene=MSTRG.4038

AGGGCTAGGCTGTGGTATGGTCGGGGTAACGCGGTGTCGCTTGTAATAATGACGTAGAGTGT  
GCGAGGGTGTGCCCGTGGGTACGAGGTGTGTTAGCGGAAACGGTGTGCGGGTGTGTAGG  
GTCGGCGCTGGCCGTAGCTATCGTAGCGTACGGGAAATTGGCTGTGGCTTCGCCAATGGAT  
GCCAGGCAGGAGGAGACGCCATTTTGATATACGGGCGCACGTCAAGCGTTCGCTCGTAGG  
GAAACGCGGTCTCGAGTCGGTCTGCCGCTTCGCGTAGGACCGCGCGGGTGAATTCGTCCGT  
TCGCGAGGTTACGAGTATCGTTAATACGAGTGCGTGGCGCAACGGATTCTGTTGCGTTTCGT  
TGACAAGTGACAGGTGAATCGATCGGGCCGCGAGGAAAGTCGCGTTGCGGCCCCGTGCC  
GTAACACGGTTCGCTCGGTTGATCGGTAGTGACTACTGTGTGTGGAACACGTGTACATTCTG  
GATTTTTCCCCACGCGGGCGAGTTCAGTGCGAGGGACACGGTAGCTCGTGTATATTGGTGC  
GCTGATCCGGGGTGGCGGTGTACGGCAGGGAAAAGCCGCTGTCTCGTTTCGCGCGCGCGAG  
AGAGGCCACCGGCCGACACTTCGGGCCAGGACAAGACGACCCGATGTGCGGAGCGGGTTCG  
CGACCCCGTGTGACCCCGTGGTCGTCTCTCGTCTTCGCATATCCATCTCTTTCATAGCACCAG  
GACACTCCTGGCGTAAATGTGCTCTCATGAGTGCCCATGTGCACCTTCTTTCTGTCTGCTGC  
CCCTACGTGCCCTGTAAACCCAGAGCACACCCCGATTAGCACGCCACGCACTCTATCACT  
CGCGAATATGGCCAAGATCCTCAACAAGACCCCGTCACCTACGAAAGGGAGAGGGAAA  
ACTTCCTGAAGGATCTCCGTCACTTCCATGAGACTAGAGGGACTCCCTTCAAAAAAATCC  
GAAAATCAATGGAAAAGATATAGATCTGTACTTGCTGTATGTTGTGCTTACTGCTCATGGCG  
GATGGATAAAGATACCATCAAGAGGGTTACCTGTTTGAATGAGGTGACATTTTGAGAACGA  
CCGAAACTGTAAA、

205. >MSTRG.4046.1 Gene=MSTRG.4046

CCACGAGGCAACATCGCCAGTGCCATTTCGTGCGCCGAGTGCGATACGGTCGATAGAAGAA  
AGACGACAGTTAACAGTAGTGATTCCAGCTGCCGAGCATCGCCATTCCATAATTTTCCCTT  
GAATCGGCACTCGACACGCGTATCCCACCCCTTGTCGAGGGTGTCCACGCTTCATCTCGCTT  
CGGGATGCCGTACGTGCGACCGTCATGACGCGGCTACGGTTGGATAAGAGTTTTACGAATG  
TGCGGAGTTGCAAACATCCGATCGTTCCGTTCGGATAACGTCCAGAAGTTATCACGATCACG  
AGGGCGCCGGAAGTAGAGAGGAGGGAAGAGGAAGCGTGCCCGATTCCGCGTTTCAGGAA  
CGTATTTCGTGTGCCACGAGTGAACATAAACTGTTTTTCGCGCTCGGCCTCGTGGTTCGAGCCGT

GACATTGGACTTTCTTGAATCTGTTTACACGCGTGTACCGCAAAAATCGTGGAATCCTCG  
ACCTTTGTGCTCCTGTGCTCTATCGATCACTATCGCTGGATCGCAACTGTGAATTATACAAC  
GACCGAGGATTTAATTCGATTTCGTAATAATCGATGGCGTTGCATTGCATTGCATTGATTGTG  
ATCAGTGGATTGGTTTTAAATTAAGATCGATTTTTTTTTTTTAATTATA

206. >MSTRG.4077.1 Gene=MSTRG.4077

GGTAGCACGTGCTTAAAAGTTGTTCACTTCGTACGTTACGCTTGCCAGCTTAATGATCAATG  
CCCGCGATTCTTTGAAATCACGAGTTATTATTGAAATTGTGCACGAATTATGGCCCGTTCTT  
AACCTAGAATCACGTTTCGATTCCGAAACCGTTTCGTTGCGCGCGCAATCGTCGCAGAAAA  
GTCGTACGTGCGAAATGTAACGTAACACATCGAAGGAGAGTTTCGCACGGGTCTAGTTTAAC  
GGTTGTAATACAAAATCTTTTCGATGTTATTTCTTTGGTTTTTTCGAGTTTTCTTGTGATAA  
CGTTAACAAGCGAATGGCTGTTCAAACGGATTATAACAAGAACGTATCAATAACGGCACG  
ATCCAAGATTATAAACGTAAACACTATTACGCGTTTCTTATTATCTTTCGACAAATGTGTAT  
TAGAACCGGTGCCTCCTTATTCGTACGTCGAACTTCGGTAGTTTTTATTATTGATGATCGAC  
TTAATCGATGATAATTTGTTTCGTTGCGCAAAATCTGTTTAATGGTGCTTCCAATCAATGTTCC  
CGATAATATTCATTTATGCGTCGAATTAAGAAACGTTTGATTTTTTCGTGAAGTGCGACAATC  
GGTAAAATCAATTACAAATTTAAATTTATTGTGCAAGTGATTATGTGTTTATTTTCGTTGATG  
TAAGAGGAATTTTGTCTTCTGTTTACTCGTCTGATGAGTGTTAAAAAAAATTGAACTTGT  
CAAGCTCATAAGGTGTGAAGTGCATTGTGAAATGTAGAAGTGAGAAACAGAAATTGAAGA  
ATCGTTCAACATATTTTAAGTGATATAATCTGCAACTGTTGGAACATACTCGAAACGAACTT  
CGTCTTCCCAACGATAAAACAAGGATCAT

207. >MSTRG.4086.6 Gene=MSTRG.4086

GGAATGTTTATCGAGATAAGAAATAATGGGATAATCAGAATTAGTATTATTAATTAATTTA  
ATATATTAATAGAATATTTTGTGATTGTATTTTCAATTTTCGAATTCAAATTTAAATCATATTT  
TCGTTACATTTTTTTCTAAGATGTAGGTCACATAGTCCCCTTCTTGTACCTATCCTAGACAAG  
CGAATCTAGGCTGTGAGCAGAGTACCGGGTGCATATAGGTATCGATCGTAAAACGGCGTTG  
CTGCAGCCTGGCCTGGTGTACCGGCGAACTGGGTACCTACCTAACCTATACACATCATTC  
GCGGATCTTGTTCTCATTTGAACAAAGTCGAGTACGCCTCTCGTGTTTCTTCTCTGTATTTA  
TGCGTTCGTGCAGTTTCGCCCACGCATGGCATAACGTTTCGTGTATCTTCGTGACTCGTCTCTCT  
TTTCTTTCTCTGTTTGCTTTATCGTTCTGAATGTGTTAAGAAATATACTATCTTCATCATCTC  
TTTTCTTCATCTATAATAATAAGAGCATATTCGCTGTAATATATGCATTCTATGATCAG  
GAGATGTTTTGATTCATTCAAATCAATGTTTATTATGGTGAAAAAACGATTTAAATTAAG  
ATTTAATTTACCTGCTTTATCGTGTTATTATTTATGTAGAAAAAGTGAATACAAATATACG  
GGTGTGACAAAGTTAAAGCGAATAAACTATACGTGCGCATGCACAAGGCTGCACGTCACC  
TTACCCTCAAGTGTTGTGGGGCTGCGCCTACTGCATTCATGCGAGTTGAAGGGTCTGCCGTG  
TCGACGTCCATTACGCATGCGCAGGGTTTTGCACTCTGTCCACTGGTCTGCGCACGCGGCCG  
TAGTTGCAGAGCGAAACGGGTAGGGGGCCGCGGGTCGCGATTTCGTGAGTCGTGTGAGAAG  
GACTAGCCTGCATCAGTCTTCGTGCGTCCCTTGCAAAAGGGTACGCTCGTCTTCACATCAT  
CGTTAATTTATTTCTCTATTTCTGAGTGCACACGTTATATTGCTATAAACGCGTACGTTAAA  
TATATATTAAGCTTCGATTGCAATATCGAATAAGTAAAATTCTTGAAAAAGGGTGATATTT  
GGAACCTATGGTTTCCGAGAAAGAATCTCACGCAACCTAGGAACAACCTGACGCCGTTTCA  
ATTTTGTTTAATTTAAATCTTTATTTGAAGCACTTTTTTTTGAGCATATACGCGAGTGCTATT

AAACATTCATAGTGTTACTAAAAACGTGCGTGCGTAGTGTTGCGAGTAATTCGCTTCTTTAC  
 CTGCGAACGCTTTTTTTTTATCGCGTTCATAAATCTCAATACAGAGAAAACACTACATAGAACGC  
 AACTCGGTACTTTTCGGCACGCGGCCGAATACCTCCGATCATCAATCTTGAGACTTTTCTTA  
 GTGATCCAATAGTAAAGAAAGAAGGAATATGTGAAAAGAATTTGGAGAAAATCTATTGTGA  
 ATCAAAATCCTATACTGCTGGATTTCAATTCGAATACTAAATCATTGGTGGACATAACCTGTA  
 TGTGTTCTGTGAACAGGAAGTTTCCCGTAGCAAGAGTGGGTGGTACGAAGAGGGAGACGC  
 CGGTCGAGCCTTAAATATCGATTTTGGTATGGAAGAGGTACGATAGTCCGTCCGTTTCAACG  
 TGTCTCTTACTTTTGTGTATCTCCACGTTAAGAAGTTTGGACAGTTGAATACTAGAATACTTC  
 ATCAAGAGGAATCGCGTGCATCGAACGAGACAA

208. >MSTRG.4144.1 Gene=MSTRG.4144

TCTTTTTTACATTTTAAATTTTAGAAATAATTTTATACATTTTCATAGAATATGCTTCACGAAG  
 GTACGATCACTATTGCACTACAAAATTTTCGTCCAATTTCTCCTTCCGCTGCCTGTTTGA  
 AATAACTTGAAGTTTTTTTTTTTATTCATTTAGGACACAAGTGCGCACCAAAGCATGACACA  
 CCGAGTAAGGGTCGCAATTACTGCTAGGTCTTCTGTCTTCCAAATAGCCTTTCTTTTCTTCAG  
 CAACTCCACGAGGAATGCGAATACTAACATTACGATTGGCCACACCAGCGCTGAAATCGT  
 ATATACTACTGGTCTCGCATTTTCCAGTCAGACGTCGCTCGTTGTCTTTTCCCTCCGCGTGGAT  
 CATACGCTTGAATGTGCCTTAGGTGTTGTTTGCTCAATTTATCAATTGCTTTCTCAATTTCCG  
 CAATGCCATTTTCGGCACGCATCGATTTTGTGCGAGAAGTTTGTATGTGCACCTGCACCATT  
 CACGAACCATCCATAATTTTCGGGTCTAAACTAACAACCACACCAAACCTCCTCAGCTACAC  
 GATGAAGAATAAATCTAGCAATCCATAAGTCGTCTCCGGCAGATATTCGGCTACACGGGCC  
 GACTTGGAATTCCCATTTGTGAGGGCATAACTTCTGCATTAGTACCGGCAATTTTACGCCAG  
 CATAAAGGCAAGCTCGATAATGAGCCTCGACAATTTTCGCGACCAATTACTTTGTGCGGCGCC  
 TACACCACAATAATAAGGTCTTGC GGCTTAGGGAAACCATTTTTTGGCCAACCAAGTGGT  
 CTACCATCAAAATCAAGGAAAGTATATTCTTGTTCAATTCCGAACCATGGATCTTCATCTTT  
 TATAGCTTCCATAGCCTGATTACATTTGGAACGTTTGTGATGTAGTCGGGGTCATGTCACT  
 GTAGTAGGTATCACATAATACTAATTTGTTATTTCCACGACGAAAGGGGTCGTTGTAAATTG  
 CCACTGGACAAAGGAAAATATCGCTGTTTGCGCCATCTGCTTGGTAAGTTGAACTACCGTC  
 GAAGGTCCATATTGGTAAATCTGATGGATGTTTTGGTACGAAATCTACCGTCCTAGTCTTGC  
 TTCGCAAGCTTTCACCGGTACCATCAATCCAGATGTATTTTCGCTTGAATTTTATTTTCCGGTT  
 GAGGCAGGTCGAGGTATTTATTTAACAAGGTTTTGTCTAAGGCCGCATTTCGGCGATTCCCTC  
 AGTATGACACGTGACATTGTAATGCGCTATTATTGCCGGTCCAGCAATCGTGGAGAGTGTG  
 ATGTTCTAGATGATCGTTTGATCGATGGCTGTGGAGCGGAGTTGCGCGTCGCGTCTTATCGT  
 GTTATGTTGCAAAGAGTTAAAAGGCACTGGTCATAAAGGCAACGAGCGTCTGATAGTACG  
 GTCTGTGATACTACTGTAAGAGCGCGGCTGCGATATTTATGTAGAGAAGCGTTTCGGCGCA  
 CGCGTCGTTTACCCCGCGCTCTCGACTGTTGCGATTCCCCTCTTCTAGCTTGAAAGTGATTAT  
 CCGATGTGATCGTAGGTCCACTGGATTGTTACATGCCGGAATAATTCTTGTCTGCCTCTGTTA  
 CCATGGTACTTGTGAGTTACGAACCATCGACCGAAATTATTCACGATTCTTTTTCAATGACG  
 TAACTTGAACCTTGCCAAGGTTAAAATAAATCATCGCTGATTATCGTGTGGAAGTTTTAACA  
 AACAATTTTCCAATCCTACTAGATGAATTTTCAAAACGGAGCAACTTCAAGAAATAACCA  
 GATATCGATAAATATCGATAAATAGGTAAGTGTGAAAATATATTTTTCCCTATTAAGCG  
 AAAATAAGATTATTAATGAAAAAATTTTCTTTTTTATCAACTGTTGACAAATAATATTCAT  
 GATGAATTTAAATTATTGTACGATC

209. >MSTRG.4210.1 Gene=MSTRG.4210

GAAAGAAAAATGAAAATATTCCATGAAAAATAATGATCTGTAACAATATATAAATTCATG  
AATGATCGGGAAAGAACATTTTCGTTTCGATTGTTCCCAGACAAGTTGGATCAGCGTGAAAGA  
AAGGGGCGGCGCGAGGAACGCGGTTGAAACGCGTGCAATTATCCCATTTCATTAGAACTCT  
GTAACTGGCATCACTTCAAAGGCTGTCTGGTCCGTTCTTCTTGCGTTTCCGCAATAGCTAGT  
TCACGTTCAAGGGCATCAACGGCACGTATTTGTCGCTTGGTCGGAATTTGTAAGTGGGAGCAC  
AATCGGTTTCGATACCGATTCCGTGTAACCATTTCTCTGCCACTGTGAACAGGGACGTCTCTC  
CTTAAAACAAGTTACTTGTATCACATTAAGAGACCAAGAGTATTTCGCGACTTCC  
GAGTTAAGATTCTGCAAACATCTACGGAACTTCGCATCGCAGTCACAGTGAGACCGTGTGA  
AAGGCGAGTTGTTGCATATACCATGAATGCACTCCTTAGGCGATATAGTGATAGGGCAATG  
GTCGTGCTCTCTACAACATGCATCCTCGGCTGCATGGTGTCCGAGTTCATCGTACGACTTTG  
CTAAAGTACCTGGGCCACACCATTTTGTGCCTGGATAAATCAATCCACCTCCTGCAGGTTGA  
TTCTTTCCCTTGTCTCGAGAAGCTTTACACGTTTCTTCCAAATCTGCTACGAGATTGCTCGAC  
ATTTGACGGACTTTTTTTGGATCAGCACCAAGAACCATTTTTTTGAATAACACCGCGATCGGT  
GTACAAGGCACAGAAGGGCGCATCCGCGTTTAATTCCACCATTTCTTGACATAGTGGTATCT  
GCCACGAGAACACTGGCCTCAGTTTCATCCCCCAGAGTGTTGGTATGAGTAGTAGAAATA  
CTGCAAGCATATTGAAGTTTATAACTCTCGTGGATGATGATCAATAATTTTTCTGTCTTCA  
CAGGATTATGATCTTTCAACAAAAGAATTTTTGTGATTCCACAGAATTGTGAATCTCAAAAT  
AGAGTGGTTGTGCAAAATTTTTTTCTAAAAAAATTCGCCTTATCTCTCTCAACGGCCACTA  
TCAAACCTGATCGTTGAAACGGGTCGTCAGGATACTAATATTATGTGGCATAACATATATGAA  
CCCGTGATCCAGATTACACGGGGGAGATTCCAAATCACGTGATATGACACATGTTTGCAAC  
CGTACAATATATAACTTCTGTTGTAAATAGATCGAATTAATTTGTCGACATGCTGGCGATGT  
TTTTCTTCCAGAGATTTTGCAATCATTTCAATTTAATATCTCTCGATACGAACCAATTAAG  
ACAGAAGTAAGAAGTGTATTTTCTTATTATTAATATCGATGATAGCTGCGAACTAG

210. >MSTRG.4216.1 Gene=MSTRG.4216

CGAGACAAAATGGTCGACAGTGATGTAAAAAAGGAGAATAGCAAAAATGCTCAACGTCT  
GATTGAGGTTAATGTTTTTTTCAAAGTGAAATATATATATGAATAATCCACTTTTTGATAAA  
ATACTATTTGATAATTATCGATAAATATAATTATGGCGTCTAAAGTTACTTTTAAAATAACT  
CTGACATCTGATCCGAAACTTCCTTTTAAAGTACTTAGTGTACCAGATAAACTCCGTTTAC  
TGCTGTTTTTAAAATTTGCTGCAGAAGAATTCAA  
GTATCTCCATCAACATCTGCAATAATCACAGATGATGGAATAGGTATCAATCCACAACAAA  
CAGCAGGAAACGTTTTTCTTAAACATGGATCTGAATTGAGATTAATTCCTAGAGATCGAGTT  
GGATATGGTAGATAATTTGCACAAATAAAAATTCATTGTTTATAAAATTTTCATTTATATGT

211. >MSTRG.4241.2 Gene=MSTRG.4241

CCCTTCTACAAAGCATTTAGCTCGCGTACTCAAGTGATTTCATAAGCGACCGCTTCTCGTTGG  
CTTCTCAAGCGTCTCTCTTTCTGTTCCCGGCCACTCTCGAATTCCTTCGGCACGAGAAGGGC  
AAAGGAAAAGAGTTTTATCGAGCTGCAACGGCTAGAGCAACGTAGTGAGTCACTCTCGGT  
GACTGGCTCGTTGTAATTCATTGCGATGATTGAACCCCCACCAACTGTTCTCGAGTACGGG  
TCCATTCAACGAACGAACCTCGGTGACCCTAGAACCAGCTGTTTTCTCGCTTGCACCTT  
CGATTGATCAGAAAGCTCGGTGGTGGTGATTGAGTTCCTTGTTTATTCATTTTTCTTCGTA



TGGGTGCAATTAAGGTGGCGGATTGAACGATTGAGTTGTTCAATGTAATTTAAAGAGGATA  
GAAATGGTATGTATATATTGGGATAACAAATTGAGTTGTTGTAATTAATTTGTTCAATATGA  
TAAATTGTTTATTTTAAGTTGTTCAATGTGAATGTAGTTTAATGTTGTACTACATGGAAAGAT  
GTTTAGAATGAGATATAGATAGATAGTTATGTTTATAGAAAATGGAATTTAGTATATTTATT  
GACATAATAAAGAAATAATATTCATACAATGAGGAG

212. >MSTRG.4279.5 Gene=MSTRG.4279

CACGAAGATCACGGAGCACCAGTAGACGGCAGCACTGCGGGCCGCGCGTATCGCAGTTCG  
TGTCTGATCATCTGCGCGCTTTTGTCTCCACACTGGTCGACTTGCCGTCGTCGTCGAGGGT  
GAACGTGCCCCCACCCTCTCTCGGCTTACCCACCCCGAAGATTTTCTATTGTTGCCGCCGT  
GTCGTATCGGCGCGTACGGGTAGTGACGCTTTCGTGCCGGCGTTTATCCGTTGGTTCCGTGC  
TTTTCTCTGTTCCGAGTAATAACCGGAAATA  
GGAATAGTGTGTTGTCGCACTGGTTCAGAAACAGGAGAAGCGGTGCCCCGCAGCGAAGCCG  
ATGGGAAAAATATAGGATAAAAAAAGGATCGAGAGTGGGGATCTCCGGAGGGAGAAGGA  
AAAAAAGGAAAGGAAAAAAGGTGATACTGTGAGGAAGCCGTCGGAGCTGTTTCTCGAA  
AAAGGAAGCTCAACGATACGCGCGGTGTCGCGATTTCGCAGTCGCTTTCGCGTGAAGTTTGC  
TACGCGTCCTTGAGGCACGCGAACATCGTGTATGTGTGTTGCGAGTTGCGACGAAAATTGA  
CCGTTTCGGTTCGTTGGACGCGTGAATGGGCAGGGGCTCGAATATTCGGAGTCGAGAGTT  
TCGTTCAACCGTTTAATCTGACTTTGTGCTCCCTTTGTCGAGTTTGACACAGTTCAAGTGTT  
TCTCGAGTCGCGTCGACTCTGTCCAGCCATATTTGACGCGAATGCTTTCACGCTGATATCCA  
AAGTTATTCGGCTCGTGTTCAAAACGGTGTGTGAGTGTTTTCGAATCGCGATAAATCTTCCG  
GGAGACGCGCGTGAAAGAAATTGTAATTTACGCGATAGATGCGAGTTGCGAGTGAAATGC  
GCCTCGAATTGGCAACATTCACAGACGCGAGTGTTCCCTAACGATGCCGCCGCGTTTCTAACC  
GAACGCGATACGCCGGTTCGAACGTTTTAAACGGAATTTACTAATTATTCAAGCTCGATTTA  
CCTTCGAGCTCTCGAGAGCTAAACGGGTACGGAATCGTAGAATATTTCAAGGGTTTGCTC  
TCGTTAAATATCCGAGTGTCGTCGCATCGGGTATCAAGAGAGATCAAGATCCGTATCGATA  
TGTGAGGCTCGTAGCGAGAGAGAATCGTTCGATCGATGTTGCCAGCTCCGCTTCGAAGGAC  
GAGTGAACATCGAGAATGATCGTTACAGTGAAAAAAACACGTCGCATTTCAAGTGAGGA  
TTTTACACAGAATCGTGAGAGGAGGTGGGTGTATATGTATGTATATATATATATATATAT  
ACACATATATATA  
TATACATATATCGGTTTCTCGTGACGCGTCACGCGCGATTTTAATTCTAACCTCGACGGTCG  
ATGAATGATTGTGTGCTGTGTCAAGTAAAGTGAAAGTCAAGCGCGACGGACGGCCATATTT  
CATGGATAAACGTGCACCATAGTGACCGGCTCGAACTGGTTACAATCCACGGTTCCAACG  
CCACGAGACCCGAGACCTGGAAGGAGGCCCCGAGGACGTCCTGGGAACGCCACACAGTTG  
CACACAGCGCCTAGGATACAAAGCCCTATTTCTCAGCATCTCGAGAAAGAGAAGAACTCT  
GCGCGCAACAGCCGGCGGCGACGGGTGAGCGAGGGTGGTGAGGCGGGAGCCGCGAGAA  
GGAGGCAGCGGTAGCAGCGGGCGAGGGTGGAACGTATCGTCGTGCCGGCAGTCGGAGG  
ACAGGGAGAATAAGGGCCCCGCGTCGTCGGGCAGGCCCGGCAATCGCGTGCCACGGCCCCG  
TCTTGTTGCGGAGGAGGCGAACACACCGCCTCCAAGCTCCGGAAACGCGGCACCGCGG  
TCAAGAGCCCGATCGAGAATCAAAGACCCGTGAGACGGAGGCCGAGGCGACTCTCCTCCG  
GTTGCCAGGAGACGAGGACAGAGGCGGCCGCCGCCGTCG

213. >MSTRG.4285.1 Gene=MSTRG.4285

TTCGTGCTTCCTCTCACGAACGTGATAATCAGGCACGCTGATAGGCAGGGACCGTTTCTCGC  
 TGTAGTCCACCGATGCATAACTCAAGTCCTCGAACGGTTCGAGCTTCTCCGCCTCTTGCGGC  
 GTAACGGAGATGACAGTCAACGTCAACACGTGCCCCCGACTTTATCAAATCCACCACCT  
 GTTTGTGAGTTGCTCCCTCGACGTTCACTGTTTACTTCTAATATACGATCGCCTTTTCGTA  
 CGCCGGCTTTTTTCGGCAGCACCTCGAGGTAATACGGCGCTGACATGCTGAAGCGGCGCGTA  
 CAGTTCCCCGTTGATGCTTCGTAGTTGTCCACCCTCGCTGACCTGACCGCGTACATTGAACC  
 CAAAACCAGTTTCGGTTTTGTAAATAGTGACGCGTCTCGGTCTTGTCCGATAGGATTTGTTT  
 GGTTTACCGGATGTTGAGGCACACGTCCGTTGGTAATCATTGTTACATTGCGGTTTCTCGTTA  
 CGTCTTCGTTGCGGGCTGGCAAGCGCTGCACCTCCGATTGCGAGTCCGCCATCTTACTCTCT  
 G  
 ACCACCCATTGATCTTTCTCTCCTACGGAAATC

214. >MSTRG.4297.6 Gene=MSTRG.4297

ATCAAACCTCAGTCGCAAAGCGTACGTTTCGCGCGTGTGTTTCGTTTGCGGGTTTCCCTTGTTC  
 AAGACAAAACCTTGCTTGCTTGCTTTGCTTGCTCGTCGCGTGAATTCGTCGTAATTCACGCG  
 CTCTCGCCGATTTCGATTTGTGCTTTTCGTTTCCAGTTGGAACGGTTCGTTTATCCATGTGAG  
 TGGTGAAACGTGCAACAATCTCCCTATAGATAGTGAATTCGTTGAATTTATTATTACGAAATG  
 AGGAGCACGTGGATTTCCGGTGACATAGCCGAGGATCACGATGAGTGTACTGCACGAGAG  
 AAACCTTGAATTTGAATCGCTGAAGATCGTCGAGGCCTCGCTATCTTAACGACTTGTCTCA  
 TCGACGTGTCAAATCGTGAACAGCCCCGGAAGTGACAGGACAGACAGAGGGTATAGCCG  
 CGACCACCGATGGCGGCGCGAGCTTTCCGCCAACTTCTCGAACGTCGGCATATTGGAGA  
 ACTGCGCCGGCATGGAGGCGGCGAACGGTTCGATCGAGCACGACTTTCACAATGCTTTGGT  
 GCCTATAAACGGTAGCCATTACAGGCAGCTCCGGGAGGAGTACACCGAATGGCGGCGACCC  
 AGCACCCGGCAAACCTCTTCGTGGGTGGCTTGTCTTGGCAGACCAGCAGCGAGAACTCAG  
 GGAGTACTTCGGCATGTTCCGTACCGTCACCGATGTCCTGATCATGAAGGATCCGGTTACA  
 CAGATATCGACGAAACCGTGAAGGTAACCGAGACACGGCACGATACAGCAAGAGTACGC  
 AGGGCGGCGAACGCGAAGAACGCCAAGAGAACGACGGATTAATTAGTTTATTTTTTCGA  
 TGCCTAGATGAGTTGCCAATAAAGTAGTTTCGTTTCAAACCTGTAGCTAACCTGTATTGTGTG  
 TACGATAATAACCCTTTTCTCTCTCCACAATAGAGAAATACCTTTTTTTTCGAATTCGTAATTCTGTAT  
 TATTATTAATCGCGGCTAATTATACATCGTTCTATCTCATTTTCATGCCATGAAAGATGGGGA  
 GACACGTGCGAGAAATAAAAAAATTCTCTGGAGAAAAATCGATCGATTTTTTTTACTCGCA  
 CATGTATTCGCATCCCGAGTAACATCCTTGTATTATTATTTTTTTCTTTCTTTTGTGTTGAGA  
 GCTGTATAATTTTTTTTTTTTTTTTTTTTAACTTACTCACTCACGT

215. >MSTRG.4299.1 Gene=MSTRG.4299

CACTCTCGCCGGTCAAAGCAACTCTCTCTCCCTCCCTCTCCCTTCCTCCTTCCCTCTCCCTCTC  
 TCTCTGTGTCACTCTTTATTCCTTTCTCTCTGAGAAGGTGGAGGAAGAAGGAAGGAGATGAG  
 AAAAAGGATTCTGGATTCTGGATTTTGAATTTGGGAGAGAGAGAGATATATATATATATAT  
 ATTCACGTGCGCCGGGATATTGTCTTGTACAGCAGTACGCCTTTAAAGAGTTACTGGTGTG  
 ATGGGACATTGTCCTCGTCCCGTGGCCCTTCGTGAGATATACGTGCTTCAGTGTTCTTTTC  
 CTTTTCTTCTTTTGGATAGAAAGAGAAAAAAGTGGAAGAAGAGAAAGTAGAGGGGGGA  
 GTGTTTCTGCGTGTACACGTTTGTGCTTCGTGACACGTATACGTACGAGTATAATAATAACG

TTACGTGTACAACATTTTCATCGGTTGGTAACTGATAAATGGACGAAGAGGATCAAAGAAGA  
AAGAAGAAAAAGGATTTTGTGTATTCGAGGAGGCGTTGCCTTTCGCGAGACAATTCCTACA  
CGTCGAAAGATGGAAGAGGACTGGTCTCTAAGGTGTCTCTTAATTCTTGCCAGCGTGGATG  
CCGTCACCGGTTTCCGGTCGATAAGGCAGCTTCCGCAAGGTGCGGCTGTTTGAACGAACGA  
CCATTTGATTCGCGAAAGAAAGAAAGAAAGAACGTGTATCGCGCTTAGGATCGATGTTACG  
TAAAAAAAAAAAAAGAAAAGGGGAGGGGATAGAAAAAAAAAAAAAGAAGCATTTCATCCAT  
CCAACATATCCGACACACTCTTCTCTCGATCCCCTCCTCTCTTCCACAAGAAACAAGGAGA  
AGATATCGTGGATCCGTTCCACGAGAGATTAAGTTACCGACGAACGATCGCCAATCAAAC  
ACAGTGAAATTTTGAACGGTGTCTGTATGTCTGTACTGGCAAGATGGCGATGCCCCGTAACG  
TTCCAGCTCTCTATATGGAAGCTACGCAAAATAAAACCCGCCATACAATTGGACAATCGTT  
ATCGGTTGATGAGGAAAGAGCCAATGCTGGACGCTGATGGAAGGAGACCGATGACATAG  
GCCCTGACGACACCGCCCCCCCCACTCTTGCGGAGGGATACGCTATAATGGAGGAAAAGG  
GATGGGATTACTTTTCACCGGAGAAGTTCCTCAATATTTAAATATATTTTTGTTATCAATTTA  
CATAAAATCGACAAAATTATTGAATTATTTTGGACTGGATATTACAATAAACGATTTTCCT  
TTTAAAATTCATCTGTTGGTTGGTATATTGGTATAAGAGAGAAACGAGGAGATCAAAAAAA  
AAAAAAAATGTAGGCCAGCTTTTTGAATGGAAAAAAAAGGCGTATTAATCTACGCATTGTG  
AAAGACGCGCCATAGTTACTGTTACGAGCCAGGTGTAATAGTTTGCAGAAAGCGAACAAC  
AACCTCCTTTGATGTCCGATAGTGTCTACCTACCGTAAGCTTGCCAGCTGCTGCACGTTCC  
ACCACGATATATATATAATAAAAG

216. >MSTRG.4299.2 Gene=MSTRG.4299

GGTGCGGAGGCGCCGTCGCGAGCGAGCGACGCAGTGCCGTCGGGACGCTCGACCGAGCGA  
TATCACCTCAGTCGCAGCGAGAGACGCCTACGAGACGACGACCGTTGCCGCCGAGCCG  
CCGACGCCTGAACAACGTTTTCCCGTAAAGACAGACTCTTCTCCTACTACTCCTGCTCGGTG  
GTCGGGTGCCGGGAGCCATCGTCAATGCATCGCTTGCCGCGCGCGAACTCTTCGCGGCGGA  
GAAGAGGGGGGAGGAGGAGGAGAGAGAGAGAGAGAGAGAGAGGGAGGAGGGGGCGAGCGGC  
GGGCAATTTCTTCGCCGCGTCGAGGCAACTTTTTTCCCATCCTCTCTGTGTCACTCTTTATTCC  
TTTCTCTCTGAGAAGGTGGAGGAAGAAGGAAGGAGATGAGAAAAAGGATTCTGGATTCTG  
GATTTTGAATTTGGGAGAGAGAGAGATATATATATATATATATATTCACGTCGCCGGGGATATT  
GTCTTGTACAGCAGTACGCCTTTAAAGAGTTACTGGTGTGATGGGACATTGTCTCTGTCCTC  
GTGGCCCTTCGTCGAGATATACGTCGCTTCACTGTTTCTTTCTTCTTTGGATAGA  
AAGAGAAAAAAGTGGAAGAAGAGAAAGTAGAGGGGGGAGTGTCTGCGTGTACACGTTT  
GTGCTTCGTGACACGTATACGTACGAGTATAATAATAACGTTACGTGTACAACATTTTCATCG  
GTTGGTAACTGATAAATGGACGAAGAGGATCAAAGAAGAAAGAAAGAAAGGATTTTGTG  
TATTCGAGGAGGCGTTGCCTTTCGCGAGACAATTCCTACACGTCGAAAGATGGAAGAGGAC  
TGGTCTCTAAGGTGTCTCTTAATTCTTGCCAGCGTGGATGCCGTCACCGGTTTCCGGTCGATA  
AGGCAGCTTCCGCAAGGTGCGGCTGTTTGAACGAACGACCATTTGATTGCGGAAAGAAAG  
AAAGAAAGAACGTGTATCGCGCTTAGGATCGATGTTACGTAAAAAAAAGAAAGGG  
GAGGGGATAGAAAAAAAAGAAAGCATTTCATCCATCCAACATATCCGACACACTCT  
TCTCTCGATCCCCTCCTCTCTTCCACAAGAAACAAGGAGAAGATATCGTGGATCCGTTCCAC  
GAGAGATTAAGTTACCGACGAACGATCGCCAATCAAACACAGTGAAATTTTGAACGGTGT  
CGTGATGTCTGTACTGGCAAGATGGCGATGCCCCGTAACGTTCCAGCTCTCTGTAAGCTTTAG  
GTGCTCTCTCTGTGTGCGTGTTTTTACCCCCGTGTCAACGTTTCTCTGTGTCGATCGTAAT

ATCCTTTTCCCTCTTCTCTCCCCCTCCCCCTTATACGTCGATTTCCATTTACAGAATATTTCA  
 AAATTTCTATATAATTTTCCAAGATCGAATTTGCAGCGCGTGAAAAAGAAAAGAAGTTTT  
 CTCTCGATTTCTTCTCTCGTCCTCGTGCATCCTTCGAAGAGAACGAGACTGGTGGCCAATA  
 ATAATTTTTTTCAGTTTTCAACTGCTTCGCCGCGACGAGATATCGCCTTGCTTGGCCTAGTTCC  
 CATAGGAGGGGAGGGGGAAGGCGAGGGGAGGGGAATGGACGGAGAGGGGAGGGGGGGG  
 GAAGGCGATGATCGGTTCCTCGTGATATCATCTCTCCGCGTGTCTCCGCAATACACCCGA  
 AATATCTGCAATCGCGGATATTTACATTATTGAATAATGAATCGGGCTCGTTTGTGTGCGTT  
 GTTGTGTGTATACGCAGTGTGTGTTGTAACATGGATTAAAGAGGCGCCACGACGGGGCGCA  
 GTGAAGAACTCGAACGGGGTCGATGAAAAGGTTAACGTCGGGTTTAGGTTCGATCGTACCCC  
 GTACACCGCCGTCCTCTCTTTCCCTTTCTCCTACCCCGCCCGCCTCCCCTCTCTAATCGACT  
 CCCCCTCTAGGTTGCCTGGTTTCCCTAGTTTCGATCAGAGTTTCTACGGAGCGGCCGACGTT  
 CGATCGGTGTTTGAATGACGTACGTACACGCGCGCGCGCGCGCGCATATACACGTATAC  
 ACACACGTACACGTTTAGCGGCGCTCTACCTTTACCGGCTCATCGCGACGGATCATTTTCGAC  
 CTGTTCAATCAAACCGATTTCATGTAAACAAGTAGCAATGGCACAAGAATTCTGATGAACCA  
 ATCAGAGAGAAGAGTTATATTCGAAATTTATTAAGGATTTGGAAGAAAAGGGCGGGAATA  
 TTATCGGATGCAACGACCAAGTCACGGATCTCATCAGAAAGGATGATGAATTTTCGATTTG  
 CAATTACCTCCATTAATAATTCGCCGTTATTCCACCTATTTTCGAAAAAATGAAAAAAAAGG  
 AAGAAAAAGGGAGAAGAAAAGAGAAGAGGGGGTTCGAGTCTTCTTCTAGTTACGGCATGC  
 AGAGATCACTGTGAGAATTGATTAGCCGTTGAATTAACGGGCGCGGCACGTTTGCGATTTCG  
 AGAGAGAGAGAGAAAGAGAATGAGAGAGAATGAGCGAGAGTGAGAGAGAACGAAAGAG  
 GGAGAGAGACTTGGTGGTTCGTCGGAGTCGGATTTCAACGGCAGTGGCGGCGCGGGCGGTG  
 GTGGTGGTAGTGTGGTGATGGTGGTAGTGTGGTGATGGTGGTAGTGACAGTATTGGTGGCCT  
 CGTAGATGCACGTGGAGATGGGAGAGCAATGGTGGTTACTAGTGCTGGTGGTGAAGAGGT  
 GATGGTGTGGTAGTATGCCGGGTGAATGGGGTGGGTTGTCATTTAACCTTCCTCGTCGGTTA  
 GTAGAGGGCACAGCCGCCAGGCGGCGACACGTTTGATCGCGAGGAAAACGAGAGAGGAG  
 GAGGAGGTGGTGGCAGGTATATACCCCTTGGTTCGTTTTACCCGAGTTTTACCCGGAGGA  
 CGGACAACGACAATGCTTGGTCACCTGGAGGTCACCGCAATTGTGTACATTTGGCTATTTAT  
 CGAGAAGAGAAAATTCGTTTGGGAGAAAACGCGATCGATCGAAGAATCCGTGAAAAAGAA  
 AAAAAAAGAGAAGCGAGAGGCCAGCCGAGAAGCGAGAAGATAATGAAAAACAGAAT  
 ACTGGCTCCGCCATGTTTCATCGCCCTCGTGAGAGACACCTTAGACAAGAGAAATCCCTCAT  
 AGATGTGTAGAGCCTAGAATATGGAAGCTACGCAAAATAAAACCCGCCATACAATTGGAC  
 AATCGTTATCGTTGATGAGGAAAGAGCCAATGCTGGACGCTGATGGAAAGGAGACCGAT  
 GACATAGGCCCTGACGACACCGCCCCCCCCACTCTTGCGGAGGGATACGCTATAATGGAG  
 GAAAAGGGATGGGATTACTTTTACCCGAGAAGTTCCTCAATATTTAAATATATTTTTGTTA  
 TCAATTTACATAAAATCGACAAAATTATTGAATTATTTTTGGACTGGATATTACAATAAACG  
 ATTTTCCTTTTAAAATTCATCTGTTGGTTGGTATATTGGTATAAGAGAG

217. >MSTRG.4340.1 Gene=MSTRG.4340

ATATCTAATCTATGGTTGAATTTGCTCTTAATTAATTCACAACGGTTAACCGCCATATTGATT  
 CTCTTCATTATCCAATCAAAAAAATGTTTCTCGTTTTTTTTTATAATGGCATTATTTTATATG  
 ACGCACATTGTAAATAGCTTATAACATTGGTACTTAATTGATTTACTATGATGTTTTGGCGA  
 AATAAAGATTTTACAGCATATAAAGTGATTAAACAGCATATAACAAATTAGCAAGAAAAT  
 AATGTTTATGAATTGCTAATAAATACGCTTAAGATATTGATTCATTATTTTTTTATTTTTTATC

CTAAATAATGTAATCTCTCTCCTTTTATTTATTTTTTTTATTTATGTTTGCTTTTAACTTAGTTT  
 CACTTTCAATTATTACTAGTATTATAATTAATTATTTTAGATTCAATTAATAATATTGAGAAT  
 CATAATAAAATAGTGAAAACGTCAAGAACAAAATCTCAAAGAAAGAAATAAAAAATATA  
 TTTGATATTAAGTCTTCTCTATCTATTCATACTAAAATTAAATCAAAACATATATCGTTAAAT  
 AATCTTTTAAAAAGAAAACTTTAAAAAAATAAAAAAATTGCACATTGAAAAGTTGAATTTG  
 AAAAAAATAAAAAAGAAATATCCAGCAACATAAGGCGCTACTATCGTTCGTTACCAATCT  
 ATTTCTTTTCATCTGAAACTTCCGCTTCCGAAAACCTTAAGACTAAGTCACTGAATTATACGG  
 AAGAATGGCAAAGTCTAAGAATCATACTAATCATAATCAAAATCGTAAAGCTCACCGTAA  
 TGGTATCAAAAAACCAAACGTTATAGGCATGAATCTACACTTGGTATGGATCTCAAATTC  
 TTAAGAAATCAACGTTTTGCCAAAAAACATAATCTAAAACCCAAAGAACAATTA AAAAGG  
 GCAGAGAAACGTAAAGCTCTTCGTGAAGCTAAAAAATAATTCTTTTTTTAATATCAATGATT  
 TTATTGTAATAAAAAATTTAAAAAATGAAAAAAAAAAAAAAAAAAAAAAAAAAAA

218. >MSTRG.4384.2 Gene=MSTRG.4384

CAAAATTATATTTAATAATTTAATAATTCCTTAAAAATTAACCTAACTAAAAATTTTATTTAA  
 ATACTTTAGAAAATTATAAATATACTTAAATTTATAATAATACAACCTTAACCTAATCTAAAT  
 TAATATATCATAATCTAATACATTTATTATGAGATTTTCTAGTTGAGGAATTACTTACTTTTA  
 TATTTCTTGGTGGTGGGATCCTAGTTCTCTTAGCAAAGACTGCTGCCGATTCTAACCTTATAC  
 TTGCTACATTTCTATTTCTTCTCAATTCTTGTTGTATTCTTCCTAACGATTCAATCCTTGATGGT  
 GAATCTCGTCCCAAATTTGTTCTCTCATTTTTCTTCTGATTTGTCGTTTATGGAGCCTTGCAG  
 TTTGTTTCAAAATTTTATCCAATTTGCAGATTTGCAGCCATTTTCGCGATACTCGAGCTGCAC  
 AGAGCAAAGACTCCTCATCCAAATTGCGAAGAATTATCTGTGATACTTCCAGTGGCAATTC  
 GGAAATGAAATCCACTTTTGTAGGCTCAAATATGCCAATAGTTTGTAGGAAGCTCTTGAAA  
 AATCCATATTGCTCTTATGGAAGGAAATTCAGGATTGATAATTTTTCCAAAAATTGGATGT  
 TTATATACTCTTTTTGCCGAGACGAAAGGGGCGGGCCCTCGTTTGATTGGGCCTTGGTCCAT  
 TGATTCAACCAATCACGTTGACCACGTAGTATCAGTTGTATCGTAACCAATTGTACCTAAC  
 CAATAGGAAGTAATATATTCTTGAATAATATATGATAATAAGTAGCAGTATTTATATTTTGT  
 TATATTGGAGTATATTGTAGTTTCATAATGGATAATTAACCTGAATTATTTTTATGTTAAAA  
 AAAATTATTTCAAGACAATAATCAATATTACCAATTTAATTATATTATAACAAAGGAACGT  
 AATATGATGAATGATTAGAATAATTAACAATTCGGAAGAATAACATTAAATTTTTTTCTTTA  
 TTTCAATTTTCAATTGTTTTGAGAAATTAAA

219. >MSTRG.4384.3 Gene=MSTRG.4384

CAAAATTATATTTAATAATTTAATAATTCCTTAAAAATTAACCTAACTAAAAATTTTATTTAA  
 ATACTTTAGAAAATTATAAATATACTTAAATTTATAATAATACAACCTTAACCTAATCTAAAT  
 TAATATATCATAATCTAATACATTTATTATGAGATTTTCTAGTTGAGGAATTACTTACTTTTA  
 TATTTCTTGGTGGTGGGATCCTAGTTCTCTTAGCAAAGACTGCTGCCGATTCTAACCTTATAC  
 TTGCTACATTTCTATTTCTTCTCAATTCTTGTTGTATTCTTCCTAACGATTCAATCCTTGATGGT  
 GAATCTCGTCCCAAATTTGTTCTCTCATTTTTCTTCTGATTTGTCGTTTATGGAGCCTTGCAG  
 TTTGTTTCAAAATTTTATCCAATTTGCAGATTTGCAGCCATTTTCGCGATACTCGAGCTGCAC  
 AGAGCAAAGACTCCTCATCCAAATTGCGAAGAATTATCTGTGATACTTCCAGTGGCAATTC  
 GGAAATGAAATCCACTTTTGTAGGCTCAAATATGCCAATAGTTTGTAGGAAGCTCTTGAAA  
 AATCCATATTGCTCTTATGGAAGGAAATTCAGGATTGATAATTTTTCCAAAAATTGGATGT

TTATATACTCTTTTTGCCGAGACGAAAGGGGCGGGGCCTCGTTTGATTGGGCCTTGGTCCAT  
TGATTCAACCAATCACGTTTCGACCACGTAGTATCAGTTGTATCGTAACCAATTGTACCTAAC  
CAATAGGAAGTAATATATTCTTGAATAATATATGATAATAAGTAGCAGTATTTATATTTTGT  
TATATTGGAGTATATTGTAGTTTCATAATGGATAATTAACCTTGAATTATTTTTATGTTAAAAA  
AAAATTATTTCAAGACAATAATCAATATTACCAATTTAATTATATTATAACAAAGGAACGT  
AATATGATGAATGATTAGAATAATTAACAATTCGGAAGAATAACATTAAATTTTTTTCTTTA  
TTTCAATTTTCAATTGTTTTGAGAAATTAATAAATGAAACAAGAAGTTGGCCATAATGTATT  
TCGAGATTGAAAAATAGAATGAAATGATGAATTGCCTTGTAACATTTGTGATGTGAAAGTT  
TTTTATTACACATTTTAGATTTGATGATGTGACTATGATTAAGGTAAATTCTCAGATTCCTAA  
TTAAATTAATAAACTTTGTAATTATGCATTGCATAAAGTCAATAAATACTAATTTGTAATATT  
CATATCATATATTATTGGACATACAATTATTTATTTTTCTTAGCACTAAGATGTCAAAATTGT  
ATTTAATGACAAATTCTTAAAAATTAACCTTAACCTAATAAATTTTATTTAAATACTTTAGAAAA  
TTATAAATATACTTAAATTTATAATAATACTTAACCTAATCTAAATTAATATATCATAA  
TCTAATACATTTATTATGAGATTTTCTAGTTGAGGAATTACTTACTTTTATATTTCTTGGTGGT  
GGGATCCTAGTTCTCTTAGCAAAGACTGCTGCCGATTCTAACCTTATACTTGCTACATTTCTA  
TTTCTTCTCAATTCTTGTGTATTCTTCCTAACGATTCAATCCTTGATGGTGAATCTCGTCCCA  
AAATTTGTTCTCTCATTTTTCTTCTGATTTGTGCTTTATGGAGCCTTGCAGTTTGTTCAAAAT  
TTTATCCAATTTGCAGATTTGCAGCCATTTTCGCGATACTCGAGCTGCACAGAGCAAAGACT  
CCTCATCCAAATTGCGAAGAATTATCTGTGATACTTCCAGTGGCAATTCGGAATGAAATC  
CACTTTTGTAGGCTCAAATATGCCAATAGTTTGTAGGAAGCTCTTGAAAAATTCCATATTGC  
TCTTATGGAAGGAAATTCAGGATTGATAATTTTTCCAAAAATTGGATGTTTATACTCTTTT  
TGCCGAGACGAAAGGGGCGGGGCCTCGTTTGATTGGGCCTTGGTCCATTGATTCAACCAAT  
CACGTTTCGACCACGTAGTATCAGTTGTATCGTAACCAATTGTACCTAACCAATAGGAAGTA  
ATATATTCTTGAATAATATATGATAATAAGTAGCAGTATTTATATTTTGTATATTGGAGTAT  
ATTGTAGTTTCATAATGGATAATTAACCTTGAATTATTTTTATGTTAAAAAAAATTATTTCAA  
GACAATAATCAATATTACCAATTTAATTATATTATAACAAAGGAACGTAATATGATGAATG  
ATTAGAATAATTAACAATTCGGAAGAATAAC

220. >MSTRG.4453.3 Gene=MSTRG.4453

AAACGTCATTTCTACTTCTATGTAACGAGATAGAAAGTCATTTCCAATTTATGAGTTGGAA  
GTAATAATACTTATAGGTGTTTTATATAAATTAATTTTATTCTATATTTAAAAATTAAATGAA  
ATGTAAAAAATATTTATATATTCTAAATTTGATTATATCTGAAATAATTTAACTTAAAGAAA  
CTTCAGCATGTATACAAGAAGCAGACAGAGTCAAGGCTATGCCAATATGAGAAACCAAAA  
TAGTTCAAATGTGGGATATCAAGGTCAAAGCACTGAAATAGTAGCTATACAACAATACCG  
AGGAGGTCTATTCAGCCAGGGACTAGTTCGTCAGTTACCCACATAGCATAGCCTCCATAGG  
CCATATTTTTAATAACATACTGAACTGATGTTTAAATGATGTACAAATGATTATGATTTTTAA  
TAAATTTTATAATAAACTTATCAACATTAATTTGTATAACACAT

221. >MSTRG.4558.1 Gene=MSTRG.4558

GGGGTAGCGACGCGTGTATCGACGTCAGCGTCGTCGGATGCGGCAGAGACATGGGCGCGT  
GCATCGGGGCGCTCGTCGGCGGCTCCAGAGCTTTGTCTGCAGATAGTCAAAGATAGGAACG  
TACGGGGACCTGAGGATGTAACGCCGGATGCACCAGCGTCGCGTGTTGCAGCGTTCTGGT  
AATTCGCCAGCGGTCGAGTACGCCAATGGATGGTGCCACAATTCAGGACCACCAGGGAAG

AATGGGCTCCCTAGGTGTCCAGTTAGAGGGTGCATCAGAGCAGGGTGCAGAGGTGGCTGCTG  
 CAGCGGCTGGTTGCTTGGGTTTGCTAACCTTTGTGTTACTTTTTGCAAATTCCAAACGTATGG  
 TTTGTGGCATATCAGGATCGAATCTAACCCCTGCTGAAGGTCCTGTTTCGCCGCCTCTGCA  
 CCGGCCCTCGTGTGAAAAGTCACGAAACCCACCGGCGACGCTGTTTTCCCATTTTTGCTTGT  
 GACTTTCAACAGGGATCCCTCGTACCCCTCGTATGCTCTGAAGAGCAGATAGAGCTCCCTC  
 GGCTTGGCGTCCATCGGCAAGCCGCTCACGAACAAGGTGCGCACCTCGTCTTCACCGGTGG  
 CCACCGTGTGACGGAGTCCATACTCTGTGAGAGCGGTGCGTCCATGATGCAAGCGAGTTT  
 GCTGGATGGTCCGGGGTTTCCGGGGGCTGCGGTTTCGAGCGGGTGGCGGCGATGAGTCCACC  
 GTATCCCGTCTCGGGCGTTTTAAAGCGGGCGGCGTTATGGTTGTACCGGCGAAGACGACAG  
 GCGCCTCCAGGACGTATCACTGGAAATAACCCTTTTCTCGCGAGAAACCCAGGCGTTTCGC  
 CTCCTTCCTCCTTCTCCACCTTTACTCCTTTCCTTTCCGTATCTAAACGCGCGCGCGCACGTAT  
 GTATGTGTGTCGGTTCTACTTTCTTCCGTTCTACCCTCTCTCTCTCTCTCTTTTCGTCGTTTC  
 GCTTCTTCCGCTTCCTATTATGTTTCTTCTTCGTCGCTTGCACCTCCACCTCCACCGTCAC

222. >MSTRG.4605.2 Gene=MSTRG.4605

AAATTTGTAAAAAACTGATTATTAGATTACAAATTTAATATTTTCGTTTAGTGCGAGGGCAC  
 CAGTTGTACCAAGAAAATCTCGCTAAAAACGTGTGTTATCGATGTCTATTGATAAGGTTGTT  
 TATGCCAAAAAATGTAATAAAATATTGTGAAAACAAAGTTATAAACAGGTTAAGGAAATT  
 AAAATTTTTTATACTGTGTGTTTAGTGTATCAAACCTGGAGATGGAAAATAGTGGTGAAAGTG  
 GTGACGATGGAGGACCTTTAGGTCCGACTGCGTTTCTTGAGGAGGTGGTGTCTTCTGCATCA  
 TATATCAGTGTTCACTCTGACGATATGGAAGATGATCCTGAAAATACAGATGATTCAAATC  
 ATGGAGCAAGTGATCCTTTGCAAGGAGCTGGAAGTGGCAGTGTTGGAGGGCCTCTTCGTGA  
 ACAAGATCGATTTCCTTCCAATAGCAAATGTAGCAAAAATTATGAAAAGAGCAATACCAGA  
 AGCAGGAAAAAATAGCAAAAGATGCACGTGAATGTGTTCAAGAATGTGTATCCGAATTTAT  
 ATCTTTTATCACATCAGAAGCAAGTGATCGATGTCATATGGAAAAACGAAAAACTATTAAT  
 GGTGAAGATATTCTATTTGCTATGACAACTCTTGGTTTTGACAATTATGTAGAACCACTAAA  
 AGTATATCTACAAAAATATAGAGAAGCAACAAAAGGAGACAATCCAGGTAATGTTCCAAC  
 AACAGGCAATGGAAAACTGAACCACAAGGAAGTATATATGAAGATCAATTATTTGCTATT  
 GCTGCAACTGCATCTAGTGCTACCACTTCTGATACACCTGTTATATATAGTTACACTTCCACT  
 G

223. >MSTRG.4649.7 Gene=MSTRG.4649

GTTTAGTGACCGAAAGTACTAGTGCTGCTGGAAGTCAAAAACCTGTGTTGAGAAAAGAAAT  
 AGAACCCGCGCAATTGAGATTACTATAATTATATGACTTACATCTTTATTTTCTTGTGCCTCG  
 ACAGATTTAAATGTTTTATTAATCCAATCTTTGACATCGAAAGTATCTTCGGAAAATGCAGA  
 TACATCCTGAAATCAACAATTTAAGAGGAAATACTATAACGGAAAAGTCATTCTGGAAGAT  
 GCTGTTTCATCCCTTACAATGATCAGTTTGGTTTGATTGTAACACAGGCTACTTGGATTTTCGAC  
 AAACCATTTATCAGAAGATCATAAATTGAAGAGGATAAGGGAGGGAAAATAGAAAACAG  
 CATGTTATCGGCCATTTCCGGGCCCTTTGTTAATCGCCACGCCTCCGAAACTGCGTTTGCGC  
 GTAACAATTTGCGCAACAGTTGGAAATTGGAATTTTGCCTCGAAATAACCTTAATTTTCGACA  
 AAAATAAGAATTGGCTAAA

224. >MSTRG.4672.1 Gene=MSTRG.4672

CTAGTGTGTACGAAATATTCGTAACCTTTGACTTTTTAAACGGTTGTTATAGAAACAAGCTCTT  
 TGAAATAGTGATATTAAGTCATTTGAAGAAATGAGAATTTTAATAAAAAATACAAATTA  
 TATTATTTTGTCTGTCTACATTCATTATTTTATTTTAAATTGTAACCTTAATAGTAATAGTCTCA  
 CCGTCAAACCTGTCTCACAGCGGAGAAAAAGAAAGAAATCGAGGCAGCATGCCAGAACCT  
 GTACATCATCAAATAAATGCTGCTCGTAAAACATTCCAAACACTTTATCAAATTTCAAAGCT  
 ATTAAATACAAATTTGGATCCAACCTACATTAAGTATATGCATTTCGATTATGTGAGAATGGTG  
 TAAATCCATATGCACCTTGCAAATGTAGTAAAAGAATTACAAAGAGAAGTGAGAGCTATGG  
 ATAGCATTAATCAACTAGATTCTTCTACTAGCAAATCTAGTTTAAATAAATAATTAATCATT  
 TATTATTCATATATATATATATATAGAGACTAGTTTGCCATATATATATATATATATATTG  
 ATTATATAATAATTTTACATTATTTAATGAGTGAAATGAAATCTAATAATCTATCATTTTTTA  
 TATATATGCTAATAATATGTGATTAACAATAAAATA

225. >MSTRG.4696.1 Gene=MSTRG.4696

TATATATGTATATATATATATATGTATATATATATACATATATTTTCATGTATATAATACG  
 AAAATTGTTTGTATATATTTTCATTAATTCATTGTCAATTTCTTCGTGATATGGCATATTGTGTC  
 TTTGATACTTGTGCTATGGCGAAGGTTATTCCTTTCGAAATAAAGAAAGGAAATGGCGGT  
 ACATTTAGGACGGATATTAAGACATGAAAACCGGAAGTATAGCATTTCGGAGGTGAAATG  
 CATCGACAACCGAATTTCTAAGAGCTTGCGAATGTCTAATGATTTTACAATTTAGAGATT  
 TAAATAAATGTACTTTGTTACTTGTTTTTTGTGCGTTATAATGGTAGATAGGTACAATCCGCG  
 GCATAATCCGTTAATTGATGTTTTTAATTAATAATATCGAGAGCAATAAACATTATTTCTCTC  
 TTAATTGAATACCTAGTCAGAGAATAATGATATTTGATTAGTATATAAATTTTAATTTTACA  
 ATTCTTTTTCTCTTTTTTTAATGCAATATCTTTTTCTTTACTCTGAAAAAACTGTACTCTTTA  
 AATCGTAAAAAAAATCATTCAAACATATTATTAGAAAATGTATTATACTCATACTCATA  
 TGTGTATTAACCCGTCTATTTTAAAGAATCGTTAAATGTTGATTGTGTTTTTAAATAGTGGAGT  
 TTTTTTCTTTTTTTTTTTTTTTTTTTTCGTTAGCGAACTATAATTAACGGTCTATGTCCGCTAAT  
 AGAAAAAAAATGTTGAATGATTAATCGGCTACTGTACTCAAATAAATATGATATTCTG  
 TAGAGAAAATATGCTCGAAAATTAATATATTGATCATTATGAGATGATAGAAAAGATACAT  
 ACATATTGTATGTGAATAAGCATCTAATAATGTTGACAAGAAAGAAAAGTATATACACAC  
 GAACTTGTATATGTATACATATATACATATGTTATATACATTTTCCACAAGTATTTTGCACAT  
 TTGATATGAAAAGAAAAAGAAAGACATAGAAGGAAGATACTTTGCAACCCTTAATGCCTA  
 AGTACACAACGAGAGCTTGCACTTTTGCGAGCATATATCTTCAAATAAATAACATGAGAA  
 TTAATAAATTTGTTTGAACAGCATTTAAATACAATAATTATTGCACATACAATTTTCTATAA  
 CAATGGATCACAATTAATTAATGTGAAGTATAGAGAACGAATATCTATTAATATATCTT  
 ATAAAATGCTTCATTAGTGAAATTCATAATTAATTGGCAATATAGGGTTGCAATTGTAAAGT  
 ACAGAAAATCTTCTTCTAAATAAACTGCTTTCAAGATGGTCTCAGCCTATGCTTTACTCA  
 ATCTCAGGATGTATTCTGATATGAACTGTTCTCAAGAGTCATATTTGGTACATTACTGTAATT  
 AATTAACGTTATTAATGGAATACACAAATGATATATAAATAAATAGTGCCTGGCACCACAT  
 GTTGCCCTCCTGCAGGTTGACTTGTTTACGTTGTCTGTAAAAGATAACT  
 TGTGACGAATTATGTGTAAAAGAAAAGCATATATCTTAGGGAAAGATATGATAAAAGTA  
 GACTAATAAGTAATAAAATAAAATATATTGAATAAAATGAGAAAGAAAAAATGAATAAG  
 AAAGAATAGAAAGATTATAATATCCATGTTATAAATTAGTAAAATTATAGATTTTGTGTTTAC  
 AACATTCTGTGACGAATTAACAACCTGGCAAGTCAATTTTGCTTCTATTATAACCGAAGAT  
 TATATTATACGTAAGTTAAAGAAGGAAAAGAAAGAAGAATCGTATGAATCTTCGATATTAA



TTTGTTCCTTACTAATGTTGCAATTAGAAATATATTTGATGACTGTACGAACAATCGGTGTG  
TGAAACATAAGATATATAATGTATAGTCACTAATGATTAATCACAAATTTTTAAAATGATC  
ACAAAGTGCAATCTCTTAGCCAACACACTTTTTTATCAAAGAAAAAAAAGTATAAAGAAAT  
TGTTATTTTTCATAACGAAAAAAGTAAGATTTAATGTATTAAAAAAAAGTATATATATATA  
TATATGTCTCCACTAGTTATTAACATTTTCCTATTGATGCAAAATTTATTGTATTTGAACTG  
ATATTATATATATATATATATATATATGTATATATATGTATATATATATGTATATATATATAT  
ATATGTATATTATATATATATATATCTTCTTAAGTGTACATGCCTGAAGTAAATCCTTAAAATA  
TAACCTGCGATACGATTGCATCGGTTCCAATTCTTAAATCATTGCAGGTGGATATCTCAAAA  
TCTCTGAATAATATAATTACTTCTTAATTATATTATCAATTACTCGATATTATACGATTATTTT  
TCGGCGATATTTCAAAAACCCAGTGTTATTATGTGCTTCATTTGTTTGTATAAGACAAAGTA  
ATTTGCACAAACTTTTCATCTATAATTAGTAAGAATAATGATATGTAAAGTCTCATAATGAT  
TCGCTAAATGAGTTTGGCACAAGATATAATTATTAATCATAAATGAGACAATTGATAAACT  
TTTTATATTTTAAAAAATGATTTTATAAAAATTTTTTTTAACTTGAAATAAAATGAAAGATTTT  
GTTTACTTTATATTTTGATGTTACAAATAAAATATAAGATATTGAAGAAGTTTATGGTTTTTT  
AAAAATATATTATATCTTAAATTTATGAAAATATATAATGTTATATATATATATATGTTAAT  
AAATTCTTTTTTCAATTCTTTACCCTTAGTGCACAAAATCTAAAAATCAATTTTCGATTATAA  
TGTATATAGATTTTATACAAAATTATGAAGCATATAATATTCTTTTATAATATATATATGTAG  
CTAATCTATCGATTATTAGACATATTCTTGACATTAGACTGTCTGAGAAATCGTTTTACCTGA  
TCCACCGGTACTCGTGGTCTCGTAATAAGACAAGAATTACGATTTGCTTACCGATCTATTTT  
ATTGTAAAATACCCAAGTGAAAAATAAAAAATACGTAGTGATACCTCTTAAGGTAGGGAA  
CTTGTTAAATGGTGTACGTTAACGACACAATTGTGCGTATCATTTTAAATGTATATTTTAAATA  
TGACGATAAAAAAAAAGTATGCATAAGTTACACTCACATACACGCAAATACGTATTTGAT  
GTGTATGCTCTTGATTGGGGCACAACCGAGATCAATATGGAACCAATAACATTTTAAATGA  
TAATATATCTGTTTTATTCTCTTGTTAAAGCATTTTGTCAATTTTAACTGTTAATCAAAGATT  
ATTCCTTATTTATTGTTATATATTATATCTAATGTTAAATATTTAATAATCCATTATAGTAAT  
AATGGATAAATATGAAGTGATACTGCTAGTAACAGTTTATTCTTAAAGTTTGAATATCTTCT  
TTAGGTTAAATTAGTTAAATTGATTTAAGAAAAAAATAATAGTTTCGTGTCCTTTAATATTG  
ATCGAACGATTGTGCCTTAGCAAGAGTCGAACGAAAAATATCGTAGTGTGCGGCGATTATAT  
TATAGTTGAAAACCTCGAAGACTATAATTGAAATTGTTGGAATGCTGTGAAACGAAATGGAC  
CATCATTTAGAATGCATTAAATTATAGGACATACAGGAATTTAAAAAAGAAAAAAGAAA  
AAAAGAATATAAAAAAATATAGGAAACCAGAGTTAGAGCCTTTTTGTACAAGAGCAAAG  
TTGTTGGATAACAGACCATTTTTATTGTGAACTCAATGGATGCTCGCTTCGATTTTTTAAAT  
AATTTCTCCTTATTCTTCTTTTTCTGCTTTGTTTTCTCATAAAACATCTGTAGAAAAAGATGA  
ATTTTATATATACTAATTATAATCGTTTTAAACGAGAGAAAAAATTTCTATATATATATAT  
ATATATATATATAATATGCTTGGCATTAAATATTCGAAATTTTTTTCAAACGTTTTATCACC  
ATGGCACCATCATCATAATATGAAAATTAAATGATTCGATGATCCTACATATTCGAATAT  
ATTTAAAATTTTCGTCATATTTTAAATGACACCGATAATTTGATATTTTTTAAATTAGAAATAT  
ATATATATATATATATATATATATATATATATATATATATAATGCAAAGAAAAGTGTGTAAAT  
ATATAAAAAAATTTAGTTAACGGATCGATTTATTAACCTTTGGTGCCTTTGAAAATGAATC  
GTTGTGAACTATTGGGAACCAATCGTTTTTAAACAAACGATCCTTTTTATTCAAATATTACG  
AAATGATCTATTTATTCCGCAAAAAATTGTAAACTAAAAAAGGCATCGTACAATTTTTT  
GATCAACTTATAGAAAATAAGACTCTTCTTAAATAAATATTATTTATTTATCATTTAAAATG

AAAGAAAAAATAAAAAGATCGAACATAGATTTTCATAGTTTTCTTGTA AAAATATTATATAA  
AAATATAAAAAAATAGTTAATATTTTGTAATATAACCAAG

226. >MSTRG.4703.4 Gene=MSTRG.4703

CTCTAGATGGCGTTTACTTATTTAGGTTATTTTATTATAATGACTTAATTTGTGTGCAAAACA  
GTGTTTAAATATTTTCAATTTAATTTTATTGAATTTTATAGAAATATACTGTGTAAAATTAAA  
AAGTTAATATAAAAAATAAATACGCCTATTGATTAAAAATCTTATGTTTATAAACAGATATA  
AGATCATATAGCACAGAATATCGTTGAGTAAAGTGAATATTCCTTTGCCCCCTGTGTTGTT  
CTAAGTGCCAATTTTCAATTCTATATTATGTTAATACTAACATGGATGCGTTAGTGCAAAA  
AATAATTTCAGACTCGGGCGATGAATTTTCAAAAAATATTATTGCTTTTCAGGAAAATTATG  
GAAACCGAACAGTATTTGAAGAACTCAATAATGATCAATTACGTGAAAAATTATGGGAAA  
CATTGTTTCATTGTCTATCAGACAATTCACAATCATCTCTTCATTATAATTGTTTATCCACTTT  
GCGGATACTTAGCAAAGCATTAAACCTTTCTGACACCACCTTTGTGTTATTGCTTTAAATGT  
AGACCTAGCTTTTGCTATTATTATTAAGTAATTCTATTGTTTTCTCCATTAAACGTAGCAGAG  
ACAAAACAAAGTTAAACGAATTAATCACAGACGAAAGATTAGGTATTATATTAAATAATG  
CAGCTCTAAGGGACATAAATATAAATCTACGCACCT

227. >MSTRG.4721.1 Gene=MSTRG.4721

TCTTGTTTCCTTTTTCCGTTGAAGAGGTATTACAACAAAATGGGTAAGGTAAAGTGTACTGA  
TCTGAGGACAAAAGATAAAAATGAGTTGCTCAAGCAACTGGAAGAACTCAAACTGAGTT  
GACAAATCTTCGAGTGGCAAAAGTTACTGGTGGTGTCTGCATCAAACTTTTCGAAAATCCGT  
GTGGTAAGGAAAGCAATAGCTAGGGTATATATTATTATGCATCAAAAGCAAAAGGAAAAT  
TTGCGTTTGTTGTATAAAAATCATAAATATAAGCCTTTGGATTAAAGGCCAAAAAAACTA  
GAGCTCTTAGAAGAGCATTAAACACCTTATCAAGCCAACAGAAAGACTCTAAAAGAAATAC  
GCAAGAGATCTGCTTTTCCTCCAAGGAAGTATGCTTTAAAGGTGTAAATTGCAAGGTATTG  
AGGGATAAAATAAAGGTACTTAATATTCAAGAAATAACAGAAGCTGTAAAAATTTAAAGA  
CGAATGCCAGGGTTTCTAGAAAGCACAAAGTTCAGAAGTTCATCACTATCCTCACAGACAA  
ATGGTTTTTCGATGATGGCAAGCTACATCATGCCATTTAATTCCATCATTGTAAAAGTTATTC  
AGAATTGATAAAACAAGATTCGTCGTTACCCTGCAATATAAATTCATGCATTAAAAAACTAT  
TAAAAATAAAATTTGAATAAAGCAAATAGAAAATTCATATATATATATATAAATGATTCCA  
GTTATAATTATAAGTGAAATTATAAGTGAAATTGAATTAAGATAAATTTTTATCAATATTA  
TCTAAACTAATAAATATTTCAAATTTTCATTGCCATTAATCGTTTCAATTTATTTGTTGTGC  
GTATGTGTTGTATTTATAAAAAAATAATAAATTACCTGAGCAGCTTCACG

228. >MSTRG.4757.2 Gene=MSTRG.4757

ATTATTTTATTTTGTAAATCAATACAAAATTCGTGCTTCGAATATAACATCAATGTATACAA  
GTATGTATATATACAAAGTCCCATTTGTATATTGAGAAATAGGTAAAGAGTAATAGGAGGG  
GCGTAATTATCGGATGTATGGCTCTGGCGTCAGTCTTTGTTTATCAGTCGTGGAATTTACATC  
GCGTTACATTTTCGTTCCATTTTAAATGAAATTATTTAAAATATATCGTAATTAATCAGTGA  
TTAGTGTAGTAATATGATTGAATGATTAATTACTATTTTCGTATACAGGTGAGACTTGCTTTGG  
ACAAGACTATTTCCGTATATCTTTCTTTAAGAGGAACTGATTTGCAAGCGAGAAGACAGTC  
AACATTCAGTGGTTGCCAACCCCAAAGAATTGCGTCTGTGATCGAGATGGAGGAAGAAGA  
GATGAGATCCAGCGGATGGATAAGATTATGCTGTGAGGTGGAAATACTCCACCGCCGGA

CCGACCTGCCGAGTGAGTAATGATCATGGAACAATCGCCCGCATTTAGATCATTACCAGCA  
TCGACGGTCGATCCTTCTCGCAACATCATACTAAACAGCTGTTTGACTGGAGCCTTTTTGGA  
CTCCTCAAATCTTGGCCAGAAGTTTCCAAATTCCTCTCAGATCATGAAGATGGACTATGAAT  
TTTTTTTTAGATAATGAAGATATTTAATCAGCTTGAAGTTTAAAAATTCAAAAATTGAATTC  
AATTGATGATTTAATTAATAATGGATGATA

229. >MSTRG.4809.1 Gene=MSTRG.4809

GTCTCTTGCTCGTTCCAATAATGACGCCCTGTTTCGTCGCGTAATTTACGCGTTTTTGCCCCGA  
TGGAATGTTGTACCCGCCACGGTGATCGGTTGAATTTGTGGCTGTTCAAACGTGGCCTCCTC  
CCGTGACATAGTTCTCTCTCCATAGTGGAGAAGGGAAAGAAGGATCGAGGGAAAACCTCAA  
ATTCCCACGCGCACGAGAATTATAGAGGGCGCGTGAGAGAGAATCACAGAGCTCGTCTC  
GAACGGCCGCCATTTGTACGAGATGAAGTTATTATTTATGGGATACGGGGACTTTTTTAACG  
TTTAAACGTGGCACGCGAATACGTCTCGACAATAATTGTGTAATTAGCATAACCAGATACG  
AGGGAAACTTGATAGTTTGGATAAGTGCGCTTGAGTGGTTCGCAGAAGAAGAGACTCGTG  
AAGATTTGTGAGGTTAAATGGTAGACTTTGCATCGTTACGTTAAATTCGGTAGTGATAGTGA  
TTGCGTGGCTGCGTTCAACTTTGTATCATTTTCGACGTATAAAATTGAGATTGAGATTGAGA  
GATTAGAAAAACGCGATTAGAAGAAGAGTTAATTTGAAGAATCGAGGAATTTCTTTTTTGA  
GGTAGAAACGTTTCATCTTTGAGAAATTTCTAGTCTCGTGATTCTAATTTTGTGATTTCGTGAT  
TATTATTCTACATTGAAATTGAATATCTTAATTTAATTTCCACGTTTATATCTTTACTTTTCAA  
TATTAATTCGAGATTTGATGACAGATTTCTCTGGTATCATTCCGTTCTGTACGACGATCAA  
AATAATCTTAACGCCATTCACCATCGTACCCACGAGCAAAAGCAAGCAACGATTATCGATG  
TTTTCGATCGTGAAATATCATCATCTCTGACATACCTTTCATTTCGTCAAGGGCTTGGCCAATA  
GCCTTGACTAGTTAATTGCCAGCTACGCTCGCCCATGTTATCGTCTGTTATCGATTGATAAC  
ACGTGCGCCGCCAGTGAGTTAACTGTAACCTTGATAGATCGTACTTCATGGATCACGTTGGTT  
TTCCAACGCGATCGACCTTGGGCGATCTTGACAGGATGTTCCCATGCCGTTGACGTTTA  
TTGCCCTTCCTTTTTTCGCTCGTTCGCCGAGAAATCAACGTTGCATTACGCGCATGCTTGAATAC  
CAGATCCTACGGATGCCGTGAACTTGGATACGTGTATCTGCTTATGTAAAATATTAATCACG  
CGTGAAAATATATTTTCGAGGGAAATAATCTTGTATCGCTCGTGGATCGTGTTTTTTTTTCT  
TTTCTTTTTCTTTTTAACGAATATTGATTTCTGATCGAATTATACGAGACAGTGC GGCTTATTT  
TCGTTCTTTTTTCTCGTTAATCGACTGCTTGAATATTCCTCGTATAATATCTTTGATCACTTT  
TTTTGCTTCGATATTGCGCTATTTCGGGCTTTATCGAATTTGAAATTATTAATAATAAATTT  
ATCCTGCTGTAATATATGGTTAATTCGTTCCGTGTCGAGATCGTATTAAGTGAAACGTAGAA  
CTAGAACAGAAGAATGTCAACAAAAACAGCGTGATGAAAACATTCTTACTAGAGCGGATC  
TTCTATGCCGTTCTCCACCGACTCGAAACGGGGGGAGAGAGAGAAAGAGGATTCGTGCAT  
CAAGATCGGATCGATTCTCAAGAACGAGAAAGTAATGGCCCATGAAAATTCACGAGGTAC  
GGAGCAGGGAGCGATAGGCTGCGTGTGAAGGAATATCCGTGCGTCGAAAAGGACAATTAG  
ACCCTTTATCCGGCCAGGTGAAATTCGAGGATGGAAAAGAGCGGTGATGCAGACGTGGAA  
GGTGCAGTCGCAGTGAAACGACCGAATAAACAGCGGCGGATGGAATCTCGAACTTTTAAG  
AGTTCGAAATTCTCGAACAACGAGCAACCGAATCGAAGCGTGTCAAACCGAGAGTGTCTGA  
ACAAAGGTTTCGAGCTGCTGGCCTATAGGGAGATAAAAAGATAGAGAGAGAGAGAAATAA  
AGAAAACCTCGCTCGATTCCACCCTCCCCCCTCCAACGCTTTATCTTCCTTTCTAGAGCCG  
ATTCGAAAGGCCTTAGGCTGCCGGTTCGATTCATCGTTCCATCCTCGAAACCGAGGGAGAG  
AGAGGGAGAGAAAAAATCCCTATACACCCGATTCGTAGATTGCGAGTCTCAAGGCGACTT

CTCTCCTCCGCTGGTACAATCGCGGTCGGTCGTATATAAGCCAAGATGAATCCCCCAGCCA  
TCGGTACGCGTAATGTCTTCATTGAAGACGTTGCCTCTCCTATCATAATCTCGCTATGATGG  
ACGAGCGGTCTTTATGCGGGGACGCGGAATGGAACGAGATTAAACGAACGGTCATCAATA  
GCGTGAAAGGCTTGGTATATCCCGCGTTGAAATGGGGAAAGGGGGTGAAGGGAAGGGG  
CCGGGCGGACGACTCAATTAGTTCTCGAGTATAGTTCTGTCCTTCTCCGATCGCGGCGCGAC  
GCGTGAAACTCTTTTCGATGTTGGTGCGCATGCGCGGTTTGCAGCGGTGACAAATAACGGT  
GAGGAAGATTGATCGCGCCTAACCTAGACGGAGAGTATCGATGGAGAGTTTTTTCTTTTGT  
ACGTTGGATCTTCTTCGTGGAATAGAATTGATCCGTGTATCTCGTGTACTTTGAAAAGAAGT  
ATTCCGAGATTTTATATTGTTACGCGTCGCATCGAAAATCCAACGAAAGGATAACCTCGTTT  
TATTTCTCTTGTCCGCTATTACGAAACGTGTGGGAAAAGGATTCCTTTTCGCGCCTCGATTCA  
AAATCGCGTCTATCGTAACAACGTTGCAACGCACGATCGTATTTTCGAAATTTCGAAAGAAA  
GCGTTCCACTTCTCGATAATATCGAAGAACGATGTCTAGACTGCATGATAAATATAACCTG  
AATACTTGTTATAGACGAGAGAA

230. >MSTRG.4810.1 Gene=MSTRG.4810

ATTAGCCGTACGGCAGCCCGAGCAAAAAGCTACACGACGGAAGAGGTAACGGGCGACGT  
CTGAACGCGACACGCGAGTGAATCGCGGCCTGCACGTGGGAGAGCAGAAGCAAATAAAG  
TAACGAATAAAGAATAGAGTCTACTACTGTGTGCCAGTTGGACAAGCCGTGCAGCATCATT  
AGCCGCGACGTCCAGCTTCTGATTTCTTCGTTCGCCTACCCGTCGTCCCAAGGCGAAACCG  
AACCGACGAGATGCGCAGCCGACATTTTGTATGTTAACGCGGGAATACGATTTGCTCGAA  
GAGAGGGCAACGTGCAGCATCATTAGCCAGGACGTCGAGGACTCGCGATTTCCGTCTGCTC  
GTTTGTGGGACGAGACGTTACGAAGGTAGGGAGGAGAGGGAGGAGGGGGGAAGGGCTG  
GCCGCCCTTATCTGGCGAGGGGGGGCCTCCGAGTGAATGGTACCCGGTACTTTGTTCTCGGT  
TCCTGGTACAACCGGTGCTCTCCTCTCCTCGACAGATATTCGAACATTCGGGTTCGATGAAC  
CCTGGTTTCGAGGGGGCCTTCTCCTCCCCTCCCCTCCCCCCCCCTCTTCCCATCTCCCTTTCCGTG  
GACACTGGAGCGGTGGCCAGGGCAGCGCCCATCTGCGAAACGACCGACACCGCCGTTATC  
CATCTGCCTTCGGGATTCCGCGATTCTGTTAACATTCTTGCCGAATCGCTCCCTCCGACCGGG  
GGACCGTCGAAGAAGTTGAAGATCGTCCCGATTTCGATGAAGTTGGGTGCGCGGTTTTTTGCT  
GCCAGCTCCCTTTGCGACGATTCTCGTCGTGATTGATATATTTTTTTTTTTTAGAAAATTGAA  
TTTTTGACGCTCGATGACGAGGAGAAATTGGGAAGGAAGGATAATTTAGTTATTATTG  
GTGGAGAATGCGAGAATTGGGATGTTGAAATTGACGAGTGATTTAGATTTTCGAAATTAAA  
AGATTTCTTGAAAGGAGAGAGATTTCGATATTCGAAGAATTCGAAGTAATTTGTGGATTAAT  
TAGAAATATGGATTTCGAAGGAATTATTTTGA AAAAATTGTGGATAATTTTGTATTAAAAAA  
TCTATCCGTGTACGAGCGTGTAGGATCGATGAAAAGATCCTTCAGATCCTCGAAGTCTTAAT  
CGAAAACATACGAAGTTTCTCCGGCTCGTAAGAGAATAAACAACGAGTTATTGCTGGAAA  
GATTTATAGAGAGATGGTAAATCAACATGGCTAACGTTAGCGCGCACCAAGCACCACGTC  
CCTCTCTCCTTTCTGTAAATCATTTCAATCAATCTAAATCATCTAGATAATTTGCCGCAGATT  
AATTTCAACGAGGATTATTATTACTTCGGTCAATTATCGATTTCGTGCATAAATGTCTCTCGC  
GAAGATAAATTTTAAACCGAGGAAATATTTTATAAATAGCTTCGAGATAATTAACACGTAA  
TATACCAATTCCACCAGTTTTTCATTTTCATTTGACGGGATCATCGTCTCGATATTTTATAG  
TTTTTCTAATTTTAAAAATTATCCGCTTTCGAGGAAAATATATATACGTACACCATTCAAAA  
ATCCTACAATCCTACATCCTTTTAAACGAAACTATCATAGATCATATTCTTTAATATCAACAC  
CTCTCCTATTTTTCTTTCTTTTCGCAACGTTAAAAAATATGTAAAATTACGCGTCGTTGGAGTA

ATATCGAGGAAAAAAGAAAATAATTCGAGTAAAGAATCTTGTGGAGAATGAAAGCTTTCA  
CCCGGATATATCTCCGCCCCGTAAACCACGAGCCGAGGGGACTGGCCTATTGGCAGATCAA  
AGCGGCACTTAGGGTTAATCGCGGAACGCTTTTTTCGTGGCAACGATGTTCCGCCGATAACTTC  
GATGCCATTGAATCGTGCACGCGATCCGGCCATTAACCGGCCAACCGCGGGAGAAAAACA  
TACTTTAGACATTAAACATTGCGGCCGTTTCGTAGCGAGCGGCGTTCCCTCCTAATGGCTTAA  
AGGACAATGAAAGGTCGAGGTGAAACTTTATCAATGGCGCGCCTTTTCGAACCTTCCCTCGA  
ACGTAAC

231. >MSTRG.4869.1 Gene=MSTRG.4869

CTCTCCGCCGATATCCACGTTCCGCAGTTTCTGCCAGCCGTGTTCTGTGTTCTGTCTCGGACCA  
AATTGGAGGCTGGCTGCTCGTGGTCTCCTTGAATACATTCTGATCCCGGGCGACCCTTCGC  
GAGGGCGACGTTCCGCGAGTGACAAATGGTCCGGCCACGGCCGTTATTTCTGTCTCCTCCT  
CCTCCTCCTCCTCCTTCTCCTCTCCGTCTCTCTTTCTCTTTTCTTTCTTCCATCTCTTCCCTTTCT  
TCTTTTCTTTTGGTTACCCACACTCCTTCCCGCCTCTTTTTCCTCGGACTCGCCGCCGGCAGA  
GGAACGATTCCGGTCCGACTGCACAGCATCCGTGTCCTTGCATCCGGGGCCCTTCCAGTTTCG  
CGACGTGGCCGTTCAACGGAATGGAGGAATGGATCGAGGTTGATTCCGATCCCTTGGATT  
TTTCTTTCTTGGATCGTTTGTTACATCCTTGGATCGTTTGTATCGCGTTTTTTGATTGGTTTT  
CTTTTCTTTTTTCTATTGAAC

232. >MSTRG.4871.1 Gene=MSTRG.4871

TTTGTAACTTACTTGCTAAACAATTAAGTAATTATAAAAAGAAATCGTCTTCTTTTCTTTAAATT  
AATCAAATTATTTCTATTTTAATATAAATGTTATTTACTGTTTTTTCCTTGTGTGTGCAAATGT  
TCGCATTTTTTCATGATTGTTCTCAGAGTAGTGAAGCATACGAATCCGTCGTATCTCGTCTTTT  
TGAGAGCATAATATCTCATATTCAAAATATCTTCAAACGCGTATTTTTGGAGATTAAAAATT  
ATTTGACCGATAATTCGTATAAGCATAATTTATGTGATCATTATCACACCTATGCACTTATTT  
TTTTTCGAGCGAATCATAAAAAATGAAAATGATCCTCTCAGAAATGTGAAATCGAAAAACG  
AAATTGAAAAGCGTAAAGGGATTTTATAGGAATTACGCGATCATTGCGTGAAAAACGCAG  
TTACAGCACGGTAGACTTCCTGTTGTTGTAATACTTCATTTGTTGATGCGTTTTGTTCTGAACG  
CGCATTAGGAAAAAAGGAACGATATTAAAAAAATAAGGAAAAGAAAGTAGTTTG  
ATGAAAAAGCGCTAAAAAGAAATATAATATGCTAAATTGCAAAGAAAGAAAAACGGAAA  
TGTTGATAATTTAGTAATGCGTAATTTTAGTCGTTTCTACGAGACCAGAAAGTTGAGAGAGA  
GTTTACGATTGCCGATGGTATCGGGAAAGATGTACATTAAAAATAATAAAAAA  
ATAAAAAAATAAAAAAATACAAATAGGTATTCTGTAATTACGGCTTTATTGATTCAT  
CGCGCCTTACAATATGAAAGAGCTCGGCCAACTTTCATCAAGATGTGTATGCAAAATTGCG  
AACACTCTTAGATTTCGAAACGATAAAAAAGAAAAAACCCTCCTTGGTCGTCTCGAGTA  
AATTGAGACAAGCGTTTGCTAGAATTGTTTGAAGTGCAGCACAGAAGAACGGCATATAACT  
GTATTGCATTCTTGTGAGTATAAGAATATGCTAAAGAGGCATGCAAGAATATATATTTGCG  
TCAATTTTATGTATAAAAAATGACATTTATCAGTTCTTTATATAAATATATATATGTATATAAT  
GTATGTTTGCATATATATATAAATATATACAGACATAATTCTAAAAAATAATGGGAT  
ATTCTATTAGGGCAATGCTGTCCATCAAAATTGATGATCTATTTAGCGCTTCTTTAATATTGT  
TATTAATAGATAAAAAGAGCTAGAAGATTCTAATGAAAAAGTAGTTACGCATGTTAATATG  
TAGTTGTTATTTAATCATGTTAAAGCCTGTGCTATAACAAAGGAAAAATAGAAAAA  
GCTAATTTTAAAGTTTTATAGCTTTAATTTAGACAGCATTGTTTTAGTAGATAGAATATTCTT

GGTGAATAAAAAAAGTGATCGCTTATCACATTATTAACAGATTCACTGCTACTTTATTTTGA  
 TAATTTATCACTGTACTAACTGTAAAAAAGTACATTTAAAGAGAATAACGACAGTGTACA  
 CTTATCGCAATAAACTTGGCAGTGAATATGTTAAGATGACAAGTAATCTAGTCGAAATTATT  
 CTGTCGTTAATTATGACCCTTGAGGGTATAAAGATATATTGAAACAAATATCTTTTTTATGG  
 TATAACAATATTGGAATATTCTTCAAACATTGTTGTACTTAAACACAAAAAATATTTTCAATT  
 ATTCAAATATTAATTTTATAGAATCCTGACGCAAGAAAAAAGAAAAATTAAGATCTCTAGTG  
 TTTTGTATTGAATAATGTTTAGACTCGACATGAAAATGTTATTTCAAATGAATATTTTAGG  
 AAAACGAAAGACCAGTATTAACAGTACAACCTAGAAACAAGATTATGTGAATACTTTGTCA  
 TCGTTTTGCTTTCTGTGTTGTTCTCCGTCTTTGAAATAATTAAGTAAATGCAGAAAATACCTA  
 TTGTTGTCTAATCATGTAAGCCGTTTTACTGCAGAATTATTAATTTTTACGACCAAAGAGAG  
 GTAATGCGAAAATGGCTTATTTTTTTTTCTTTGACCATGACACGATTTTCAAAGCGGAAAG  
 TATATCAATAGTTTATATGAGATGTGAATATTTTAATGCAATTTTCAGTGAGTGATAGAAAA  
 CAAGTGACGTTTGTAAAAAGTACCTTAGAGTTAATTATTGTATGAGTCGCTTCTGTTCAA  
 CAGAATTTATTGTTTTCCGGTGTAGAAAGAAGAAAAAGAGCATACACAAATTATTTATAT  
 GCAGCGCGCAAGGCGAACAATTTAAAAAAGGCGTAAATAATGTAA

233. >MSTRG.4928.1 Gene=MSTRG.4928

AAAATCGATAATAACGGTTCATTTCTGCGCACGCATATTCGTTACAACTAATGTTGGTACG  
 AATACATTGTGACACATGACACATGATGTAAAAAATTAAGATCCACGAATTGATTTA  
 AGCCGGTTTTAGTAAAAAATTTATCTTAAAAATGCCTGTTAGTAGTAGAGTATCTCTTGTA  
 TTGTCATCAATTTTGACAGTTCTTATATTTTCGGGAATGCAAATATATAAAGTTTGGTTAGCA  
 TCATCACAAATTTATACAATATTAGGAGGATATATTGGATCGATATTATTTATGTGTGTGTTA  
 ACTGCAGTAGGAACTTGAATCAACAATATTTGGAAAATCTTTTCAACAAAAATTTATTC  
 CAGAAGTTATTTTTTCACTAATGATTAGTTTAATTGCATCAGCTTTGGTACATCGTGTAGCAA  
 CTACAACATGTTTTATATTTCTATGATTGCATTATATTATATCAATAGAATTTCTCAAGAAA  
 CATATGCTCTACCAGTACCTCCAATTTCAATTCATATAAAGAAGAGAAAAATAAAAAATAATT  
 ATGAAAATCTATGATGTTTTACAATAATTCAAAAATGTTGAATTATCCTAAAGTTACTTTA  
 AACTTTATGTAAATTAATTTGTCTTATAATATATATAATATATAATTAATGTTTAA

234. >MSTRG.4928.2 Gene=MSTRG.4928

ACTTAAAAAATTTTGCAGCTAATGTTGGTACGAATACATTGTGACACATGACACATGATGT  
 AAAAAAATTAAGATCCACGAATTGATTTAAGCCGGTTTTAGTAAAAAATTTATCTTA  
 AAAATGCCTGTTAGTAGTAGAGTATCTCTTGATTGTCATCAATTTTGACAGTTCTTATATTT  
 TCGGGAATGCAAATATATAAAGTTTGGTTAGCATCATCACAAATTTATACAATATTAGGAG  
 GATATATTGGATCGATATTATTTATGTGTGTGTTAACTGCAGTAGGAACTTGAATCAACA  
 ATATTTGGAAAATCTTTTCAACAAAAATTTTCCAGAAGATCTCATTGTGGTTTGAGCTAA  
 CTGAACTACAGCAAATTCAGGATCATCAACACCATATGAAGCCAAAAATGGATTAACCTAC  
 TCTTAAGTATAATATACCAT

235. >MSTRG.4933.2 Gene=MSTRG.4933

ACAGGATCACAGTACGGACACTTCAGTCTTGAACCTCAATCAAGGAATAGTCGCTGTCCGCT  
 TGAGCGAGCAAAATTTTTGTGTAAATCAATTCACATAGAAAAAATAAGTATACATAACTT  
 CCGGGCCAGGATATAACGATCTTTTCTTGTGTATTAGTTGGTGAAAGTGTTATTTTAAAA

GAGCTACGAAAATGTCAGACAGAAAGGCTGTGATCAAGAATGCAGATATGTCTGAGGAGA  
TGCAGCAGGATGCTGTTGACTGTGCAACTCAAGCCCTTGAAAAATATAACATAGAAAAGG  
ATATTGCAGCCTTTATTAATAAAGAGTTCGATAAAAAATATAATCCAACGTGGCATTGCAT  
TGTAGGTCGTAATTTTGGAAAGCTATGTGACACACGAAACAAGACATTTTATCTATTTTTATC  
TGGGTCAAGTAGCGATTCTCCTTTTCAAGAGTGGATAAATTGGAATCTATTTTGTAAATCACC  
ATCCTTTCTTCTCCCTTACACATGCTACATGGAAATACCTTAAGTCACATCACTGTCTGTA  
AGAGAAATTACAATATCGTGTATAATGAAAATTTGTTTTGCAAACAAGATATGCACTCCCA  
GTTAAACAAAAAAGTATAAGTATATAACAACCATCAATACTATTGACTTTGCTGTTTTACTT  
ATCTCAGGAGATAAGACAATGATGAAAAATTCTGTAGAAGTTATGGGGAAAAAGGGTAGG  
GAGATGATTAATACTAAATGAGAAGAAAATGAAAAAACTCAAACTGAAAAAAATCAATTG  
ACATACAATCTTACATGTTAAAATGTATCATGTATGCCAGAAAATTTGTTGTGTTCTTGTTTT  
ATATTAGGTATATATAATGCGAAGTTGAGTTCAATACTGGCGATTTTAAATTAATAAATTTT  
TAGTGTTTAATACTAAGTGCATCTAAGTATAATGTAATGTTTCATACAAATTCATGTATGA  
TTTTTATTATCTTACTATGCTTGAGGAACTGTATCCAGTAGTCATCAATAATGAATGTAAG  
CCAAACCTTGATTGATTGCTGCGATCATTATTATTTTACGTAATGTTGTAAATTATCCCTTTA  
TTCTGTGATGCTATATAAACAACGTTACAAAATCAACTTTGATTCGTTTGAATCCTGA  
CATGACAATTTTACATCTATAAAATTCGAGAATTGGAGGTTGAGAGAAAGCTTAATTATC  
GATACGCACCGAATTTATATTAATAAAAATTATTTAAATTTACACAGCACTAAGTAAGATG  
TTGCATAATATTGAAAGCGAGTCATTATCATAATTTTAATTTTTTATATTGTGCACACTGAAT  
TTTGCAAATGTATTATTCATAAGTCAAGATACATTTAAGGAATTTTCTTTTCCCCTCTTATTTT  
GTTTTTTGTTTTGAAAAAATAGATATTCAGCTCATTAAATTCTATCCTTTATGTAAACATCTA  
ATATCCAATATTATGGTACTTATATATATATATATTAATAATATAGATTATACATATATATTA  
AACTATTTATATATAGTGCAATCTTCATTTTCAGTATTTGATTATCACAACGTTGCTACATTG  
TTCAAGTTTTAGACTGATTATTAACATTGTCATAAATATATGACTTGCATGGTTCTTTTTAT  
AAAACCTCACAAGTCATTTTATAATACGCATATGCAACATTATTATAAGAATTAAAGAAA  
TGTTACATTAATATCAAAAAGCAGAAACGAAACAAAATTAATCATACTTTTGATTATAGCA  
AATAGTCTCAAATGTCAGTGAATATTTTTCTTTGATTATCTTTGATATACATTCCCTTTTCGCGT  
CTTAACCTATATAAACGAATGAAAAATTGTTCTGATAAAGAATACAAAAAACTGATAC  
ACTATTTAGTGTTGAAGTTTGTAAATAAGAAAATTGAAGTACAGTTAATATTATGGGAAAT  
TATGCTCAAATCAATTTATGCATTATTGATAAATTATGAATATATATATTTGTTGTATTATCA  
AAGATGAAATAAATTCATAAACTAATCCCAAATTTTTTCATATCAAAATTGTGTAATTGTT  
GAAAAATAAAGGAAATGAAAGCACTGCAATTTTATATGACAAAAAAGATCGTAT  
GTTATATTTAAAAATATATTTAAAGAAGAAAAAGAAGAAAAGAAAACAAGGC

236. >MSTRG.4983.1 Gene=MSTRG.4983

TTAGAGCCATTCTCACAAGTACTTTTGAATATTCTAGTATATAATAGACGCGTTTCAAACCG  
AGGTAGTTATCGCTTCTCGGCCTGATGGCTAAGATCAAAGTGTAGTATCTGTTCTTATCAGC  
TTAATATCTGGTACACTCCCCACCGGGAGTCAGAATATTAGTCTGATTTTTTGAACCGGGCG  
GAACCCCGGGGCTTGCTCCGCTTCTGCCGCGAGTCGGCTCGGCATTGCAGTGCCGTCGAGA  
TCGGCTCAATAAGTTACCCCAAAGATTAAAGAATTTTTCATATATTCTAGGAAATTAATAATT  
TAGTATTTTCATGAAGTAAAATTTTTTTATTAGAATGAACAGGGAGATATGTAGGAATAAAA  
ACTTGTTATTAATGTTTCAGTATCTGTTCTTATCAGCTTATCTGATACACTCCCCATCGGGAGT

CAGAATATTAGTCTGATTTTTGGAACCGGGCGGAACCCCGGGGCTTGCTCCGCTTCTGCCGT  
GAGTCGGCTCGGCATTGCAGTGCCGTCGAGATCGGCTCAATAAGTTA

237. >MSTRG.4983.3 Gene=MSTRG.4983

TTATCGCTTCTCGGCCTGATGGCTAAGATCAAAGTGTAGTATCTGTTCTTATCAGCTTAATAT  
CTGGTACACTCCCCACCGGGAGTCAGAATATTAGTCTGATTTTTGGAACCGGGCGGAACCC  
CGGGGCTTGCTCCGCTTCTGCCGCGAGTCGGCTCGGCATTGCAGTGCCGTCGAGATCAGCTC  
AATAAGTTACCCCAAACATTAAATAAGTCTTCATATATTCTAGGAAATTAATAATTTAGTATT  
TCATGAAGTAAATGTTTTATTACAATGAAATGGGAGATA

238. >MSTRG.4983.2 Gene=MSTRG.4983

TTATCGCTTCTCGGCCTGATGGCTAAGATCAAAGTGTAGTATCTGTTCTTATCAGCTTAATAT  
CTGGTACACTCCCCACCGGGAGTCAGAATATTAGTCTGATTTTTGGAACCGGGCGGAACCC  
CGGGGCTTGCTCCGCTTCTGCCGCGAGTCGGCTCGGCATTGCAGTGCCGTCGAGATCGGCTC  
AATAAATCTGTTCTTATCAGCTTAATATCTGGTACACTCCCCACCGGGAGTCAGAATATTAG  
TCTGATTTTTGGAACCGGGCGGAACCCCGGG  
CTTGCTCCGCTTCTGCCGTGAGTCGGCTCGGCATTGCAGTGCCGTCGAGATCGGCTCAATAA  
GTTA

239. >MSTRG.4984.1 Gene=MSTRG.4984

TCTCCCATTTTCATTGTAATAAAAACATTTTACTTCATGAAATACTAAATTTTAATTTCTAGA  
ATATATGAAGACTTATTTAATGTTTGGGGTAACTTATTGAGCTGATCTCGACGGCACTGCAA  
TGCCGAGCCGACTCGCGGCAGAAGCGGAGCAAGCCCCGGGGTTCCGCCCCGGTTCCAAAAA  
TCAGACTAATATTCTGACTCCCGGTGGGGAGTGTACCAGATATTAAGCTGATAAGAACAGA  
TACTACACTTTGATCTTAGCCATCAGGCCG

240. >MSTRG.5001.1 Gene=MSTRG.5001

CTTTTCTTTCTCATTCTTCTTCTGGACTTTTCTTTTAACAGCGAATAACTATCGGCTATTCC  
ATCTAAAAGTAACGAAAATTTGAAACACTTCCTCTTTTTGACATGAAAAAAAATATATA  
CATAGAACTAGCCAATAGATTATCCGTCTAAAAGTAACGAACGTTTCGAAACACTTTCTCC  
TTCTTCTTATCTGACGCGAAAAAATATACGTATACTAAAAAAGAAAAGGGGGTGTGTTT  
TTCCATCGAAGACGGGGAGACTAGAAAGAAAAACTCACCTCGTTCTCGTTGTTACCGATC  
AGTATCTCTGTGTCCTTGAAGTCCGCCTCCCTCAACAGATCGAGAGGATGCTTGGAAGGA  
AGATAACGTCGATGGTGGGCGCCGAGGGGAAGCCTAGAATCCCCCAATAACTGTTCCACTG  
TTGAACGGATATGGTCTTCGCGTCCACGGACCTCATACACGCCATCACCTGGCCGGGTCT  
CGTTCAGCATGGTCGAGTTGCATCCGCAATCGTCGACCAGTATCGTCGCGACCTCGTTCGCC  
TTCTCCCCGCTCATGTAACCTCCAGGGAGCGTTGAGGGTGCCGCTCTGCAGTATGCCGCGGC  
GCACCACTCCCCTCGTCACGGGCGAGATGAGGTGCAGGGAGACGGAGCTGCCCCCGCCG  
ACTCGCCGAATATCGTGATCAACTCCGGATCCCCGCCGAACGCCTCGGCGTTGTCCCTCAG  
CCATCTAAGCGCGAGCGCCTGATCCCAAAGACCCATGTTCCCCGGCGCCTCCTCGCTGTTT  
GTGAAGTGTTTGTTCAGATAGAGGAAACCGAACGCGCCCACCCTGTACTGCATCGATGCTA  
TTATAACGTTGCTCGTAGCCGCCATTATGTCCGCGTTGTACACGTCCAGGGTTGCCGTGCCG  
CTCATGAACCCACCCCGTAGATCCACACCAGTAAAGGGAGCAAACCGTTCTGGGACCC



241. >MSTRG.5001.3 Gene=MSTRG.5001

153

242. >MSTRG.5031.6 Gene=MSTRG.5031

ATTATACTAACTTCCTGGGATCATTATAACAAATGCAATCCTTCTGTTGGTAGTCTTAAAAG  
GAGTAAGACTGTTCCGCGAAGGGAATAGACCGATTGAAATAATACGTACAGTACACTTTTT  
TTTATCAGGCTCAGCTTTAATCGGACGTCGTTACCATAGAAACAGATTGTGATTTTTCTAT  
AGCAATTATTATTTCTTTATATGTTTCATATATGATATTGACGATATTATATTATATTATATCTA  
CATTTTATAAGTAAGTGAGAAATATTGTAGATATACATATACATATATAATATATATATATA  
TATATATATATATGTATATATATATTTATTTATTTATTTTGTTTACAACCTACAAATGATATTG  
TTCGATTAAGTACCATTCGTTTATCCGACCAAGAGTCCGATTCCGTAGGAGCCGGTTAAAA  
GGAAGTATACTCTTAATATTAATATTTATTTTATTACAAAGATGTAAATTCGATAAAAAATAT  
AAAACAGTTATATATGAACATTTTGTAGGGATATACGCAAGTATATTTCAAAACATTCAAC  
AATGTCTACTATTGAACAATTTAAAGAGTGTGCAAAAATGCAAAGTCTAAAGAAGCTTTAT  
GTTGGAACAATATAAAGAAGCATTAAAGAATATAGTGAAGTATTGAATTATATCCAA  
ATAAACCATTGCATTATGCAAATAGAGCTGCATGTTATATGATGCTTGATAAATATCCTTAT  
GCTTTGGATGATGCAAAAAAATGTATTGAATTGGATGAGAACTATACAAAGCATATGTAA  
GAATTATAAATGTTGTCTGATTTTGGGAGATATTATTCAAGCTGAACTACTTTATCTAAG  
TTATTAGAAATTGATCCTGAAAATAAAGGAATTACCACAGAGAAAAAAGACTTAGAATAT  
GTGAAAAAGTTTCTTAAAGATGCTGATATTGCATATGCTGCTAAGGATTATCGTAAAGTTGT  
ATATTGTATGGATCGTTGTTGTGATGTGAGTACTCGTTGTACAAGTTTTAAATTAATCAAAG  
CAGAATGTTTAGTATTTTTGGGAAGGTATCAAGAAGCACAAGAGATAGC

243. >MSTRG.5087.1 Gene=MSTRG.5087

TATAAAATGCAAATTTATTTAAGTGAAAACAACCTTAATTTAATGGAATAAAATATAAACT  
GATCCAAAGCAGCCGTGGAATTTTATGCAATTGCCGTGGATAAAAATTATCGTGGGAAGG  
GACTTTCAAAATCCCTAATGGCTGCAGGAATTTTTTCGCAAAAAATAACATCCCAAATGT  
AGGATTTATATTTGGAGTATATACATCTTTGTATTCAAAAAAAGCGGCGGAAAAATTAGGT  
TTGAAAAGTGTAATGGATGTGGATCTTTTGAATTACAGAGATGACGATGGACAACCTATAT  
TTCAAGATACTCCTCCCCATAATATTGTTTCTGTTATGGTTTTACAAGTTACATAAAATTTTT  
CTAAAATATAATTAATAGATTCATATTTTCTTTGTAAATATATGTAAAATACGAAA

244. >MSTRG.5114.1 Gene=MSTRG.5114

TCGAACGCGTCTTTCGTGGCCGGTATTTTTAAAAAAGTTCAAGTCACATTGCATATTTCGTT  
ACAAATAATGAAGAATTTTCATCAAACACTTGTTTTTACTGCTATCTCTAATGGCGATACCAA  
TCTATGTATCATCGATGAACATTCGAAGTCCACCACAAAAGAAATTAGCACCGAAAAACG  
AAAATATTTACACGAATTTCTTTATTTGCCTATATCTCTGATAAACGTACCATGCAACAT  
GGATATAAAAAAAGCCCAAAAGATAATTTATGTCGTGAGACAGTACCATCAAACCTAATGC  
GAAAATGCGTCGTCGTAAATCGTAAAAAAGGCCTTAGACCGCCATCTGTTATTACCTTCAT  
GCATCTTCTCATATCGACGAATCGAATTTACCGACTCAGCATAATGGACATAAAGATTAAG  
AAATAAGATGTAAATTTAGTTTATGATATAATTGTAATTTTTGTTTTTAAAATTGAAGCGTG

245. >MSTRG.5134.1 Gene=MSTRG.5134

CGACGATTTCTCGACCGATATTTTGGAACATGCGATGCTAGCATTAATAAATAAATAAATAA  
TAAACGCACTCAATCGTTGAGAAGAAAAATGGATAACTGGCGTTAAGAATATTCGGATCG  
GCAGACGGACGTCGCGTATTATTAATAACAGTTCTGCGATCGACTTTCAGCTGACTCTCAAA

CACGAACCGAGAATGACAGACACGCGTATATACACGTATATACACACACACACCACGTAC  
ACGCGCGCATGCACACCCAAAGACATAATAAGGAGAGGGAGACTCACACAGGAGAATTG  
GGAAAAAAAAAATAAGGAGGAAAGATCATAGCTGTGTATGCATATACACCACACTGTAC  
ACTAAGATTCTTAATGTTGTAACACTGTAACCTCTATTAACCTGATTCATAATGCAGTTGTATT  
CATAGTAAGTTAAACAAAGAGCAAATTTAAAAAAAAAAAAACAAAAAAAAAAGAAAGGA  
AAAAAAAAAACAAACACGTAAATTCTTAATAACGATTAAATAACACGAGAGAAGAAGGAA  
GAGAGAAAAGAAAATACAATGCGATGTATTTATTTTATTCGCGACGAATGTGAAACGTTTT  
GAAAAATTAATCGTTTCGAAAGTGAAACGAAAATGAATATCTTGAAAAGGAAACGAACGA  
GTTAATAGTAATTTTTCTGCCTAGAACAAAAATAGTAAGATCCTATAGACGTGCTGTGTTTT  
ACTATTGTACAGTTGTAATTATCGAAGAGGATGAAGAAATCCACGAGAATTTAATCTAAGC  
AACTATTTCTCTCCGAATCGTGTCTATCCGGGCTCGCTCGAAGAACGAATGTCTCCAAACGT  
TTGATATTTGGCAACGTCGCACGAGTCACGTGACCCAATTACATCCAATCGTTATACGTCCA  
CTGCTTTACCGACTCGGATCGACACGTTTTTCGGTGCGGACTCGACGCGTCCCGCGCAAAATT  
CCACAAACACGAACGGAAGATCCAACAAATTATGCCGCAAGGCGGACACTGCCACACC  
GCAGAAGGAAGAGAGAGAGAGATGCTTTCGGATAGATAGAGAAAATCTTGTAATGTCATC  
GTCGCTTGCAATTCGAATTGATCCGATATTAGTAATAATGTATACCTAACCTCTTCTACTCGA  
ATTCGAGGCATTGCTGGAAATCTTATCTTGGAATTTGGACACGAAAATGGAGAATCTGGGG  
GAAAAATTGATCGAAAGGATGATTAATAAAGAAAAGTAATCAAGATGAAGAGGATCTGTA  
CAAAGACAGCCAGCACGCCGACCTTACATTTGCACACACCGTATATATTTTGCAGACACCT  
ATACTTTGTTGTACCACTGAAATCTACACTCATGCAGCTAACTAACAACGAGTGCTTTCGGA  
TATCGTCGTTTTTCGCTACATCGGAACGGATGAGTAAGTTGGGTAAAAAAATTTGGAAGGG  
AAGTTTTTTTCTCAAGCGCAACACGCATCGCAACGACATTGCCTATATTGCATATATATATA  
TCTGTAGTATTTGTCCGTTGAACGTCGTTAATCAATCATAGACGGTTCAACGATAATTA  
TACAAAAAAGAAAAAATATTCGTTCCGGCTCTAGAGTCCTTAAAAAAGAAAAA  
GTTAACGTTTAAAGCACGCGAGGAAAACACGTGAAATCGTAAAATAATTCGATACAAATGG  
CTAACCTTAAATTGTTAATTGATCGCTTTGTAAAGTTGTTCTTTTCGTATATAGAGACTAAAGT  
TCTCGATCAAGCCTCCGTTTGGATTGCTCAAGCTCGTTTTATTTTATGAATCGTTGCCTCAAT  
TTGATTCAAGTTTGCCTCTAGAATAAATTAACCTTGGTTCAATTTTTTACTCGATTGACTCGAG  
ACTCGTTTTGGGAACTTGATCGCTTTCAACGAGGAAAGCGAGCAAAGTACACCCTGTAAA  
TATTTGATCCAATCTTAAATTCCAGAGCTTGAACGTTTCAAACGAAGGATTAGATTAATTTT  
CTTCCGAATGTTTTCGATTTCGACGTCAAATCGTGCAATAAAAAAGAGGAGGGAAGACAG  
TCTGTGTATATGAAAGAACCGTAATTCTCAAAAGAATAATATTGCCTGTATATCTTGAGAG  
AGAAAAAAGAAAAATGTCACGGACCGTCGACGGCAGGTCGTCATCGACACACT  
TTTTGTCTCGTAGAACCGTTTGAACCGCCCTTGAAGGAGCACTTCCCCCTTTTACACAC  
ACGCGCGTGGACCCCTCTCGCCGTTGATTTTCGATTTCCAACGCGCTTCGCGCGATTGGCGAC  
AGATGTCGTCGCGGAGATATGCAGGAATTCCTGTATGCGGTCGATCTTTTCTCTCGAACAAG  
TTTGAAAGATCCAAGCGGGAATCAAGGTGAACCGCATCCTTCGACGAATCGTAAACCGGTC  
ACGCGACGTTACGAGACGGAAAAGGAAGAATGGAGAGAGAGAGAGAGAGAAGGAAT  
GCGAGATAGTACGCGCGGGGAAGGGAGGATACACGCGTACACATCACATATACACAACT  
ATATATATATATATATATATATAAAACACAGACGTAAACATACATACATACATTCTGAACGA  
AGGAAAACTACATGCAATTCTACGATCACTGCCAAGGGCGTTAACCGTTGACGTCGATTT  
CTCGTTGTTTAAACGTGTCGTAGTCGTGTTTTTCTCGAATGCAAAATTAATAATGAATTATG  
AAAAACGATCGGGAAAAAGAAGAAGGAAGAGAGGAGTGTGAAAGAGTAAAAGGGGAG

ATTACACTACTACTATTACTACTACTACTACTACTACTACTACTACCACGCGCGTTATTTGGC  
GACATCTAGAGATATTATAAGCATTAAACAAAAAATGAGATAGAGAAGAAAAATGCAAA  
AAATGTATGTGTATATACATCATACATATCACATCTATATATATATATATATATACACACAC  
ATATGTGTATATAGATGTGCGTTCGCTCGAGCGAGTTCGATATACTCGAGCGTGCGAATTGT  
TCATGATACTGCCAAGCGTAGAGTGTTTCGAGTTTCTGTGTTTTTAAGGGACAACTATAA  
TACTCCTTTTAAATGTGACGAACCACCATTTACACTCCATACACATAAGCAAGCAAGCATA  
GGCACGTATGCGCGCGCGCACACGCAATGCATATATATGTATGTATATATGTACACACGTA  
TTACATGTACTGAACACACACACATACACACACACACACACGCTGATTACGTAGCATAC  
GTATGCGCATCGTGCGTCTCGCAATCTCTCTTGTCTGTTTGTCCGCCAGGCATCCTGATCTG  
TCCCGTTTACTCCTAGATGTTTCTTTTCGCTACACGTATGTAGATTTCGTGTGCATGTGTA  
ATTATTCCTGATTGTGGATCGATCGAGCACGGTGACGACTGCTCGAAGAGGAAAAATGATGA  
TGATGTTAGAGCGAATTTTTGAACAATTTTTCTTATAAATATATATATATATATATATA  
TATATCACTTTCTCGAGAGTGATCATCTATGTGATTAAGTAATTTTTTAAATAACTTTGA  
AAAAACCTTTCTGTTTTTTGAAGTTGTTTTGTTGTATCGTTGCTGGAATTTTTTAATTTTACG  
TATAGTTGTATATCGAAAGATAGGACGAGGAGAGTGTTAAGAAAGTTCTATATGAAAACCT  
GTAAAAAAGAAAGAAAGAAAGAAATGTAAAAATGTAAGATTTATAAAATTTTTAAATC  
TATCCAAATTTATATGAAATGTCAAAATCCATATGTGTTTTTCGCATACACAGAAGAGAGAA  
GAGTTGGATTAAAAAAAATTCCCTAGAAATTGATCTTTGGTAAAACCTTTGAACGGTACAGT  
CGGTACAAAAGCGAGCAGAGCCTCGCGTCTCCTTCAATCTCGAATACCGCTAAATGTCGGT  
ATTTATAGTCGATATAGTGGTCGGTCACCGTGAATCGAGTTTTTCGCACGTTGGAGCGAGATG  
GAGGATGATTCAATACGCGTTCGTAATTAGCTGACACACGGTTGAGACACGGTATTTTTTCT  
CATTGGAGGCAACAACAACGTTTCAGCCCTGCGAAACAGAGAGGGAGAGAAAGAGTGTG  
AATGAAAGAGAGAGAGAGAGAGGGAATGAAAGAGCAAGAGCGAACGAGAGAGAGAGAGA  
GAGAGTTTAATTTATTGGAAGCTGTGGAAAACGATGAAAAATGAAAGAAACGGAGCAAGC  
TTATAAGCTGAAGATTATTATAAATAAAGTTGAATGATTATACTTTGTTATGGTAGTTTGAT  
GCATTATTCTCTGAGTTTATAAATACATTGACGAATTTTCGTTCTCGTTCTTTTTCTCGCTAA  
TATATGCAATTCAATATTGTGTATAATTGTTACTTGTAACGAGAGAGAGAGAGAGAGAGAG  
AGAGAGAGAGTGAGTAAGGAGCCCTGAGAATTTTAAAATTCGAAATTCATATTTTTTCATC  
CTTTCTCTCGTTGACTAACTTCCTTCGAGACCAATTTTCATGAAAAAGAAAAAGATAAATTT  
TGTTGAAAAATTTAGTAAAATCGTTTCGAAATCTTTCTCATCGATCGAAATAAATTTTCTCCT  
CGTGAAATTGGTCCTCTTCTTGCTATCTTCGATAACGCTAAAAAATTTGGGATTTTTAACGA  
CGAGAATATCGCTCAATTTTTTAAAAAATTAATCGGTGAAAATGGTATTTCTCTAGGAAGAC  
TATTATTTACTTGACTTTCTTCCACTATACATGTACGTAAAATTCAAAATTTTCAAAATTTG  
TCCGAATGAAATTCAGGGATAAAACGAAATTAATTGTGTGGTGATAAAAACTGCAATAAG  
CGAGCAAGTTGTTAGTTTCGAACGATAATGAAGATTGTTTTACACTTGTTCGCATGAATAATT  
CCTTGTAATAACAAAAATATACAAACGGATTTTGATTTTATTATTGCGAAAACGATTCGTG  
AAAATATCGTATAATTAATCTCGACAAAATTTTCGGGGCTGCCAACTTGTATAACACCCGA  
ACGTACAAAAAATTTTTGATCGCACTTATCAACTGTCGGCAAAATAGTAACGGTTGATTGCT  
ATACTAATTTACTGTAAAAAGAAAAAAAAAAAAAAAAAGAGACGAAAAAACGAAAAAAAAA  
ACGAGAATAAATAACATAGTGAGATATTAGAAGTCTATCATCGCTGCTAGGCATAAATCT  
CGAAGGATAATGTAAAAAAGAAAAAATGATTGCAAGAGTGACATCGATACACAGTG  
AAAGACAAATTGTACAAATTGTCCAGAATTTTTAAAGAACCGTCGTTACTTGTCACTTTG  
TAGGACCTGCCCTCGTCGGATGTGCACCCAGTCGACTTACTACTACTACTATTACTACT

ACTATTACTACTACTACTACTACTATTTATTATTATTATTGCTCCTGTTACCGCTGTTATTATT  
ATTACTAACACTCGACACTAACATTTATACTCGCATTAAATGAAAATGCACGCGGCCATACA  
CACACACACACACACACACACACACACACATACACACACACACAAACGACACAACGT  
GCGATCAATCGAGAAAGGGTATAGTTGTCTGAATCGTGTACAGTTGTCTCGACTCGAGATTA  
TTTATTAATCTCGAGCCTGTTTTCGCGAGAAGGAATACAAAACGCTGAAAATTAACGAAAA  
TTAAAAAAGATTAATGTATGGTCGATCTGATTTATCCGATAGCTGTTCCATAATAAAATCGA  
CAATAGTTAAGATTCGGTGGAGATTTGTTTAGACGAGTTTAATATTAGGCTGAAGCTAGCCA  
TTTTTTTGACCGAGGTTAACGTTTACACAACGATCGATGATCCATTTGGAATGAAAATGGAT  
GATATAACGATCGTACAAGTATTTACTTGCAAACCTTGTGTGTAAAAAAATTGAAAATGTTA  
CATAGAATATATAGTTGCGCGCATATAATTTCGATTCGACGAGAAATTTTTTCGATCGACTG  
TACCGATCGAGTTACACACACATATATATATAGATTTTCAACTATATACAGAGAGTCGTCTC  
CTCGCGTAGTTCGGGCATTTCCATCAACACTATTACTATTTACTTACTCGAAATACGAAGTG  
TTATCGCTGGTGCGTAATCAATGTGATATTTTTATCGTCGAAGGGTGTGCGTGTGTGTGTG  
CTCGTTCATGCTTGAAAAAATTGGAATCTTGATTTTCTGAAACTGCGTTATTACATCGAT  
AGTAATGGCGGCGTTCGACTATATAAGTTAAGGATTATATTAACGGGCGATGAAGGCTAAT  
ATATTATATTATCAGCAGCCTTTACCACCGGATAGATAAGATTATATTTTCATTGTCGAATCC  
GCGATAATCCGGACGACGTCGAAGCAAAAGTGTATGCTGCCACTATCAACTATAAATTAA  
ATTTTACCGATACAATCTATATATATATATATATATTAGCTTTAATAACGAGGAAGCTAATA  
ACGAGCACGTGCGTATTTCTTAAATTCGTAAATTCGTCTCTTGACTCGAAAGTAACGTCAAC  
GTTTTACTAGTCGTAAGAGTGAGAGAGAGAGTGAGAGAGTGAGAGCGAGAGAGGGAGAG  
AATGTTAATACTGAAGCACAACCTATACAACCTATACTGCTTGAAACTCGATCGATCGTGCAT  
CAACAACACGATGTTCAAAAAAGCGTGCGCTTGTTTCGATGAAAAAAAAAAAAAAAAAAAA  
AAAGAAGAAAAAATTTTCAAGCGTGTCTCGTATCTTCTACTATAGCAATTATGTATATATAT  
ATATATACATAATCGAAATTATTGTTAAAATTATTGAGAATTCGAAGAGAAAATTGAGTCC  
GGTAGGGAAGGGACGAACACTGCTAGGATTTTGACTGCTCCTTTTTTCTTTTTTCTCTTCC  
TTTTTTTTTCTTTTTTCCCTTTTTTCTTGAGTAGACGAAGCGTAAGCGCGTCGAACGAAAAGA  
AAAGAAAAAAATGCGAGAGATTTTTCTCCGAGAGGAGAGAAAAAGAGAGGTTAGTTCGTG  
GATTGTGCGGCCATATTGGATTGCTATTGTAATACGAATTGGTGCTTTTTGGAATGTATTAGA  
CTGAAGAAAAAAGAAAAAAGAAAAAACAATTATTGTTGCACGTTTTGGTAGAAA  
ACGATAAAAAAGAAAAAATCGCATAACAAGGAGGAAAAACATGACTTGAACAACAGA  
CTTGACGGGAGTTTTTTGCTCCGCTATTCGATTGATGTAATTGGTAAAAATGATTATTTCTA  
TTTGGAACGTTTTATATATATACAAATATATTATATATTCGCTAGGTTGCACACTGATACAC  
ACACACACACACATGACATGCTTACATACATATATACATACATACATACATACATTTACGTGG  
TATTTTGTGTACAGTGATGGGAATCAAATCGACTTTGTGATTGGAAAGTTGTTTTTAAGAA  
AGTTAATTTAAGAGTTAGTTATCACGGTTGATCGTGAGATCGATGATCCTCGTGGCCCTGGG  
ATTCGTTTTGACAACGATGATATTTATCGATGGATCGAAGTTGATATAAAAAAAAAAAAAAA  
TTAAATTAATTAATAATTAATCGAATTTGCAGAGTTACTCTGCGGTAACATTTGTGATTCT  
AGTAGGTTAGATTTGTTAAATTCGATTCTATTTCGAAATCTTTTTAGGGACGTATTTGTTGA  
AAGAAAAAAGAAAAAATTTTCTCGCGGCGTTGTTTCTCATTTTAAATTTGAAATGT  
TCCCGCCGAAAAACGTTTGAACGTTTTCGCGCGAACTTTCAAATCGCTTGAATCGTCTT  
CTGAAGTCGTCGACCTCCGTCAAAATTTTCGTCTCTTTGGCTGTAGGAATTTTTTTTAAAGA  
GACACTTGAAAAAACAAGGATAGAAAACGTATGTATATAAAGAGATACGCATTT  
ATTACATGAGTGTCTTTGAAAATTTTCGAGGTCGACGCGTTCGCGTAGAACTTTTTATCGC

AAAATTTTTCGCGTAGTTGCAATTTTTCGCGTCACTCGTAGAAATTCGAGTGAACGGTGTT  
GCAAAATTAACGATACTCTGATGTACTGTGTAGAGTACACCTCTTTTATTATAAATTTT  
AGTCAAATTTTATCGAGTTACGAATTTGTTCCCTTCGTAAAAGAAAAAAAAAAAAAGGAAA  
AGAAAAAAGGAATTGAAAAGAGGGGAGAAAAATAATAAAAAATTTTCAAGGCAGATATTG  
GTCGCGTTACGATTCCCAACACTAATCTCACACGTGTGTATACAACATAAACGCGCGCGCG  
CGCGCGCGTGAAATTAAACGATGACTTTGGCAAGCGATACTTTGTATGTACAACATGTATT  
AGTGGTTGTTCTGTTCTGAACGTGTGCATGAATGAGTGCATGGATGCGTGTATGCGCGCGTG  
TGTAAGAGAGAGAGACTGAATCTGTGTGTGAAAAGGAAAGAAAGGGACTCGGTGTGCACT  
CCGCTTAGAAATGTGAAAGAGAGAGAGAGAGAGAGAGAATAAACAAAAGAAGAAACCG  
AGAAATGGTGGGAAAAAAAAAAAAAGAAAAGAATTTTCGTCGCGCAAGTGCAAAGAGATTTT  
TTGCGAATTGGCAATGCGGCGATGCAGTTCGACTTATTACGCCCCGTGTGCGTCTTTAATAGA  
AGTTACATGACGTAGATATTTCGATAGGCACGCGCGAAATAATTGTCTCAGTCGATTTGATCT  
TGAAAAATTGCAAATCGGATATAAACAAACATTAGGATTAACTTATTAGGAATACTTACGA  
TGGAATTACAAAATCCTTTCTTTGTATAAATGTTATATAACGGAGAAAATATTGAGAAATTT  
CGAATTTATATAAATTTATAAAATTCGAAAAGAAATATGTTAAGAATTTAGGATTGAAATT  
ATTTTGTAATTTTCATCGTTTTTTCGGTTGAAAATCCCCGAATTGGTAATTCAAAGTTGTA  
ATGTGAATGAAAAGCTACGTCGACTGTGAAGTGGCTCTGAGAAGTGGCTTTCTCGAATACC  
TGAAATATTTTGCTGTCCAGGATATCTGAAATTCTAAGGGAAAAAGAAAAATTTAAAGAA  
AATTAAGTAATTAATCGTTTTAAAAAAAAAAAAATCATTGAGAAAAATTACCTGAAATAGA  
AAAATTCCTCGAAGAAAGGATGAATTTTAAACAGAGAGAGAGAGAGAGAGAGAGAAAAAA  
GAAAAAGAAACGAATTCGGGTATTCTCGACTAAGTGGGATTCCCTTATATTACGCGTGTC  
TAGTAATTTACGCGTTCTCCGCAATGAATTTGGTGGAGCCACATGTACATCAACAATATTAT  
ATTCTAACGATTACTAATTAATAATGTACAATAATTTTAACGATTGCTAAATGATGATGAT  
GATGATGATGATGATATCGATGAAGTCTTTAAACATATATAAATAATACAGATGTTGCACG  
ATGAAAATGAAGATATACGAGAGAGATAGTTAAGCGAATAGGAAGCGAGAGAATGAGAG  
GGAGTGAGAGGTGATGAGAAAAATGAATCCGAATGCATAGTTGCAAGATTAAACGACAGA  
GGGCTAAACAGTAAACTGGACGAGAGAAGCTATACGAGATGATGTATCTGTCTTTTAAAT  
CGATGTGATTTTTTTCGAAGAAATAATGCGAGAAATATATTGAAGAAAGGACGAAGAAT  
GTTCTTGCCAGTTTATGTTCCAGGGGGCTGACTCCTTTTTTCAGGTTAGTTGGTATCCCATAAA  
TTCGGTCGGTATCAGAACATATTTAATAATTCGAAAATTTATTTAAAATTTACGAAATTTGA  
TTATGATTTTATATCGTGTAAATTTTTTGATGATTATTTATTTTTTTTTATTTTTTTTT  
TTTTAAGGTTGACAACAAAGATATCGTGCAATTTCAATTTCTCTGGAAATTTTACGAAATC  
GTTACGAAGAATCATTATATTCTCTGTGGATAATTTAATTTTAATTTTAATTAATTA  
AGAAAATTTGTTGTAATATTTGTGAAGGCATGAAGTGAATATCGCAGAAGTTAATTTAAAG  
ATTAACCTCCACCTCTTAAGCAATAGTGAATATCAAAAGTGCTCCATATAAGCAATGAACC  
GAGAAAGAATGGCTGAAAACCACTGGAACTCAAGGCTGCTAAGTTGTGCTGCGCGAATA  
AAGCTGTTAGGTAAGTGCAAAAATTCAGTCGGTCTTTATTCAACAAATATCCTTTCAACGTA  
CATAAGAACAATGATAAACTTTTATAAAAAAAAAAAAAAATTATAATTGTACGAATGTAA  
AAATAATTCATAACAAAAAATTTGAACGAAAATAGAGAGAGCAGAGTTTCTGAAAAGTGA  
AAAAAAAAAAAAAAAAAATTGTTGAATGTTGTTTCGAGTACAAAACGTTAATATCTAAAACGTC  
AATATTGATTCTTTAAACAAAGAAAGGTAAAAGGTAAAACCGGCAGAATTCTTGCATTTAT  
CCGAAATTTTCGAATAGAGAGAATCTTACGAAAAATTTGTGTGCAAGATCTCTACGGATCTCA  
GTTTTATTCCGAATTCGAAATGTCTCAAAACGAACGATACTACGAGAAACAGTTTAAAGCA

AAGATGCGTTGTGCATTTAACTTACTATGTAAATTATAAAGTTCGATTTTTTTTTTGAGACGTT  
CTCGAATTCCATACGATAGGAAGGATTAAAAATGTACAAGTGTTGATCGCGTTATGAGTGA  
AGGAGAAAAGTTTTTCTTTTTTTTGTCAATTTTAAATACACTGCAAGCTTGTTCTTCGATCAC  
GCCGATTTTTTAACGAAATGAAAATTGTTTTCGCAGCTTGTTCTTTTTTTTTTACGAATTTT  
ATCGCGCTTTGTTGACATGCAATACTGTGAGATGCGGGATGAGAAAAGATAAAAAAATTCT  
AAAAGACAAAAAGAATTTGAGATTTCATTAAAAAAGAAATGGAATTCGAAA  
ACTGCTTTTTGTGATTGAAATTTTTTAAATTGAAAAGAAAAAGAACTCTCCTTTTTAATAT  
TTTGCAAACCATTTCTGGAAAAGGGTTCTTTCAGATCAGTGTGTCCCCCCCAGTGTTAGT  
CGAGTACAACACAATTGAGAAAATAGATGAGCGAAGAGGG

246. >MSTRG.5144.1 Gene=MSTRG.5144

CAATGCCAAAAGTGGAGTATGCAATATTGGGTCGTAGAAAACAAAAAGTTTCTCGTGTACG  
CTTGTTACTGTTCGTGCATTGACTTGTATCAATCCAACAGGGAAATGGAGGGATCCCCAA  
ATAGTATTGACAGGATTGACTCGCGCAGGCGTTCCAATGCTAGTTGGCCTGCCACTATGCTA  
CTGTTCAACAGTGGTATTCTAATCTCATCCATTCTATAATATCCATTTTTATTATTCGAATCCT  
CGAATATATTTTCGTTTAATTTTACACCTATTTTATTATACGTTTCATCCATGTATTCAGTATAT  
ATAGTTGGTTAACCTCACTTCATTTTGAGAAACACTGCTACATATGATGCCATCTTGCCACT  
ATAGTGCATGTTCGTACGGGCTAAACGAACTACTTTGTTCCGGAGGAACGTAATGACGA  
GGGATGGAAAACGGATAGATTTTCAGGCAGTGGGTAAAAAGGAAGTTTTCCAAGCATCCC  
AACGTTTACAGCGACCAGCAGCTGTTTCGCCAGCTGAGCGTTCCCCACCAATGATTTCTCC  
TCACCGCCGAATCAATGAGTTATAAGGCCCTCGTCAAATTTTCAATCTCGACGAAGAGGA  
CTCATCTTATAAACGCGTTTATAAAAAATACGTGCTACATATTAATTACGAAACATAGTTGT  
TACGTCAATTGACGTTGCAAAGCTATTTCGCACGCGTCCGGGTGTGAATTCTGAGTGGCCA  
AAATGAAGGTC

247. >MSTRG.5157.1 Gene=MSTRG.5157

ACAGAGGATCGTTCCGTCAGTCGGGTCTCGGCCGCGTCAACGTCAATACGACGGCGCACG  
AGCTGATCGCCTCGGCTCGGAAGCACCGAGCATCCTCGCGATGCAGTGGGCTGGCCCATAT  
ACTCTGCCCGTTCTCGTCGTGTCTTGGTGAGGACGCAGCCGGAAGCGAGGCACGCGCGCAC  
ACACACACACACAAACCATCGAAGAGAGAGCGGATGCTTCTCGAAAGGAGCGAGTCCTTC  
CACTGTCGACAATCAGTTCCCGTTGCACACTCGCGCGAGAACAACGCCAATCAGCCAAGG  
ATCTTCTCCTTCCCTCCTGAACCTGAAAGCTGAAATCAAACCTTCGGATCATCCGTGCCTCGT  
CGCTTTCACCGCACGCGCGCGCGCACGCACGACGAAATCTTCTTCCGTCTGGCAA  
TTCTCTCGCGCCGGTCAACGTGGCAACCACCGAGGCGGACCGCTCTCCTTCCCAAGAAGA  
ATCAATCCGTGCGATGAACGACCGTTGGAAAAGTTTGAGGTTTCGTGATGGGATCGGGATC  
CGTCGGAGGCTGTTCAAGTTGAAAAGATTTATCGGGCAGGGAGAGGGGGGAGACCGATATA  
TAGCCAGCGGGTGAGATCGAGTTTGTGAAAATCGATGGAGAGAGAGAGAAGGAGAGGC  
GATTAAGGAGCGGTGAAAAGGATGTAGTAGTTGTAGTCAGCAGTCGTAGTAGCAGTCG  
AAGGAAATCGATATAGTTTCCAGCACGTGGCTGGCTTTAACTGGCGGTTTAGTTTACGCCT  
ATATACTGATAACCTCGCTTAAAAGAAAAATAAAGAAGAAGAAGAAGGAGGAGGAGG  
AATAATTCGTGCGAGTGTCTGTTTGATCGAGTGAATCTCTCGAAAAATCTTCTTTTCCCTTTAC  
GACGTTCTTTTTTCTTTTTCTTTTTCTTTTTCTTTTTCTATGTTAACTGGGAGCACAAGATAGAG  
AAACATTAGTAAGGAAGTAATATAGCAGAAGGTGAAAATCGTGGTGTGCCGATCGTGTTCT

CTCTCGACAATCCCCAAGCCAGGGATCTCTCCTCTCTCGGGAAGATCAGTGAAAAAACAGT  
 GTTGAAAATTGTGAAGTGCAAGCTTGTTAATCGGAGAAAGATCGAGAAAGTGAGAAAGAA  
 GAAGGAAGATCTTTGAAGAATTGTTTCGAGGAGTCTTAGGAGTCTGGCGCCTTCATCGAGA  
 TCCCAAACAGGGATCATTGAGAATTTTGTACGCGAATTGAGAGCAAAGGCCTATATTATAT  
 CAAATTTTCATCGTCCATCCTTCATACTTTCTCGCCTTAATCATCGGTTGATAGAAAAACCG  
 AATATTTTCGAAAGAAGCTTGGTCGTCGAGGAGCATAGGCGGGATAAGAAATCGATGTGAT  
 AAGGGAAGAGGAGGAAGAGTTTGAAAATAATTTCGATTAACTTCGAATCCGGCAACCCTCT  
 TTATCGAAGTATCGAGTTGAAAGGGTTGAAAGGGAGGGATTCTCGCGGCTTATCTCGCTCT  
 AATCCGAAAGGAACTTTTCAAATTATCCTAGTCGAATAAACTGGGACTGAGAATACCTGA  
 ACGGTATTCAAAAAAACCATCATCGTGAAAAGGAAGCAACTGGAACGCTGTAACGTAAAT  
 TAAATAATTGTTTCGAGACAATCCAAAGATATCCTCGAATCGAGGCCAGATCTAAAACTAA  
 AAATTAAGTAAATAGGATCATTTCTATAGACGTATTTAATAGAATAGATGTTGGATCTCG  
 ACTTTCAAGGGGCTCAACAACTTCTAGACTACTTTTCCAACCAAAAAGCCATCCATCCTCGA  
 ATTTCTAGCAAAGCTATTTCAAACGATACACTTTTATAAATCCTAGACAAGGAATTCTCAAA  
 GAATTTCGACCATCAAGCTGGACCAGGTCGACCAACTCCTCTTGGTAAATTTTTTTAAAGGCC  
 AAATCCGACTCAGCCTATTAATCGTCACTTGGCAACTCGTGGGATCTTAGTTTCTCAGGCCT  
 CTGAAACTACTCACTCCATTACTAAAGCTTTAAAAAAA

248. >MSTRG.5224.1 Gene=MSTRG.5224

GAAAATACTGACGTACTATGTAGTACTACGAAATGGCAAGTAGATGGTATCACATTTTCGT  
 GTCAAGCAATCCAGTCTCAATTATTCTCACTCTATCGTATTACGTTTAGGAGATGGACCCCA  
 TAAAACAAATATTGCAATAGCTATTGCAAATCCTATACTGGCAAACACAGCGACTTTTTCT  
 ACATCCATATTTTCGAAAAGTTTCGTTGAAATCTGAAATTTTCTTGAAAACTGGGAAAGCTA  
 ACCTACGCATTAATTCATG

249. >MSTRG.5232.1 Gene=MSTRG.5232

GCAGGTCTTAATCTTATCGCTGCGGTTCCACAGCCACCGGTTTGAATACCTTTGCTTAAAAG  
 TTTCTTAATTATCGCATCTCGTAATTCAGGTGAAGCGCAATTAAACGCAATGAACGTTCCAC  
 GTCCACGTACGGAATTAATCATAGTAGAAAAATTCATTTTGCAAATTCATCAATTTTTTTAAT  
 ATGTAATCTCCAACAGTTGTAACCCTATGTAAAAGATTTTCCTTTCTTATCGTCTCTAATACC  
 GCTTCAAGTAATATTTTACTTGGATCTCCCATCCAAGTGTTAAAAACACGGAACGATTG  
 TTTAGGCCTGTAAAATTACATCGATTACATATATTTAGCGAAAATAGAGGCCATAAATTTTT  
 TTTTAAACGATATTTTTAATAATAGGAAAGAAATTTTATACTTGAAAGATTCGATGTGATAA  
 TAACCACCCAATTGCATCTTTTTACTAAAGGTTACCAAATCTGGAGGAAATTCTAGATTAAA  
 ATGTTTCGTGACACCACATTTTTCCTGTTGGACCACCACCTGTTTGTACCTCATCGATTAAACAA  
 TGCTGCACCATGTTTCTTCGTTATACGTTGTAATTCTTGAAAAAATTCAGGAGATGCGTGATT  
 ATCACCCCCTTCTGCTTGAATAGGTTCAACTATCACACCAGCAACTGGAATTTTCTTCTCGG  
 TTTTATATTTCTCAAATAGTTCCTCTACATGGGCCAAACATCGTTTATCTTCTTGTGATTTTC  
 TCTAATATTTTCATCCAATGGATATTTGTACGCGGGAAACGATGCTGTAGGCCAATCAAAA  
 GCTGGGATATCTATCTTGTGAATGTATTTACTGTGCGTCGTCGAAAGGGATCCCAATGTTTCG  
 TCCATGAAATGCGCCTTTAAACGAAAGTATCGAAAATTGCGGTGTGCCAGGTAGTTGATTC  
 ATCATACAAGTTTCTATTTCTTCCTTCGTGAACGAATTACCCTTCCTTTGTTTCTCGGCGTACC  
 AAATAAATATAGTTTTAAACGCGTTTTTCATTCGAGCAAGAACCACACATCATAGTTGTGAC



ATGAGACAATCCTGGTGGAGCAATCTCTTTATGCAGCAAAATTTTTTTCAGTTTATCTGGCC  
 ACTCTTTTCCAGGGAAGATGCCTAATGCAGGCCTATTTGCTATAATTTTCTGATTAACCGGA  
 TCAGCGAGAGTTTTTAACATAGCTGGATGATTGTAACCCAGAGGCATGGATGAAATTTGCA  
 TATAAACGTCGAGCAAAATATTTCCCATCAACGTCCATTAAATAGTTACCTACTGATTTTTTCG  
 TAGTCTGCGAAAAATTGTACGGAAGAGGCTTGTTGTATCGCGTTAAGTTCTTGAAACAAAC  
 TACGTGATCGAGGTCCTGGTATTTCTGTCTGCGATCACTGGCATAATTTGGTTCTTCCGATAAA  
 GTTACGGTTAGACATCTCTTCCAAACAGTCGCATGCCCTTGGAACAATTGCCAACGTGAAA  
 ACGTTCGAGCACAAAGCGCAGTTTGACACTTGTTGGCGAGCATCTTCTACGTTCTGTTCTGTA  
 CACTAGCCTAGAGTAATTGACTGATTTTACGAGGAATCGACAATCGAATTTTGGCGATCGT  
 GCGATTCTGTGCGACGTAAACGTCCTCGCGAAGGAATGGATTCCGACTGGTCATCGATATA  
 ACACAGTAGTGGGTGATCCTTGCGCAGGAAATATTTGATCGTTTCCGAGTCTGTACGAACAT  
 TCACGAATCAGTTCCAGTTTTAACCGCGAATTTTTAAACCAAACGTGCGCGGTGTAACGAC  
 CGACCGTTTCGTTGATTGCGCAAATTTTTTACGAGTTGGAAGAACTCGATTAATCGAAAAG  
 TATAACGAAGCATACGCACGGATACGAACTCGACTGACTTCTCATCCGTGTGCGAATACGT  
 GTAACCTACCGATAAATATCCT

250. >MSTRG.5269.2 Gene=MSTRG.5269

AAGAATGTTATATAAATTATGCATTTATCTTTATAATATGTTCTTTTAAAAAATTGATGCATT  
 TAAAAAGATACTTTATAATGTATCTATATAAGTTATAATAATTTAACTTTCTGTTTATTGAAA  
 GTTATTACATAATAAATTCAAAATATATATGGAAGTTGTGAAATCTCAACAAAAGGATCTA  
 TACCTGTTCTCATTCATCATGGACTACTATCAAGTTCAGCTGATTGGGTATTATTGGGTCCAA  
 AGAAAGCTCTAGCATATATTTTATGTGACAACAATTATGATGTTTGGTTAGGAAATGCAAG  
 AGGCAATGCATATTCTAGAAAACATAAACAATATACAACCTAAAGACAAAGCATTTTGGAA  
 TTTTAGTTGGCATGAAATTGGTTATTATGATTTACCGGCAATTATAGATTATATTTTAGAGCA  
 TACTGGATATAGGAAGCTCTATTATATAGGTTACAGTCAAGGTACAACCTGCATTTTATGTAA  
 TGGCTAGTGAAAAATCTGAATACAATCAAAAAATTAAGGAATGGTCAGTTTGGCACCAA  
 TAGCATTTCTCTCAAACCAGAGAAGTCCTTTATTTAAATTTATTGTTCAATTTCTATGGATTAA  
 TGGAGTGGGGATCCTCTTATTGCAATGTACATCAATGGTTCCCCCGAAATAGGTTACAAGC  
 ACAAACTTTGGGTACAATAATTCGAAATGCTCCAGGCAGTCTTACTAAAGGTTTTTGTGTAT  
 GCTGGTTTTCTTTAATTGCTGGATTGTTAGTAGATCAGTTAGACAAATCTATGTTACCATTAA  
 TTTTGGGACATTTTCCAGCTGGAGCTTCTGCAAAACAAATTATTCATTATAGTCAGAGTATA  
 TTATCAGGATCATTTCTGTAATTCGAATTATGGAGCAACAGAAAACCTTAAAAATTTATGGAT  
 CAACACAACCACCAAAATATGATCTTGAGAAAGTAAAAACACCAATTGTAATATTTTATAG  
 TGAAAATGATTTTCTTACTGATCCTACAGATGTAAAAAACTTATTGATAGACTGCCAAATA  
 TTATAGAGACAAAAAAAATTGAATATGCAAAATTTAATCATATTGATTATTTGTGGGGTAG  
 AGATGC

251. >MSTRG.5279.1 Gene=MSTRG.5279

CGTTAGGATCAATTGTGGACGTAATGCGAGGCAGAACGGTGCAGAGTAACGCAGCGTGAC  
 GAAGCGCGAGGCAGCTTACGCCGACGCAGCTTCCCACACTGGCGTGTCTCGAACGGCGCCT  
 TCGACCAGCTTCCGATGTAACAGGTTTCATGTAGCAGAAGCTGGAGAATTTCTGAGAGTCTA  
 AAAGACATGTAATACGATGGCAGACGAGGAGTTAATGCGCCGAGTCAAACGAACTTCCGG  
 GTCTTCGGCGACCCTCGTTTGTCTCGGAAGCCAAAGAAGTCACAAGGAGCCGTTACGTAGT

GGCATCGAAGCATTAAAGGCATCAAGGCGTTCGAGTCTCTCGATTGCCGCGTCTTTCCCATCA  
CCAGGGA

252. >MSTRG.5299.7 Gene=MSTRG.5299

TAAGTTCAGTTGTTTTATATATATATTACAATTTTCAAGAACTATGGTAAGTAGAACGAA  
CTGTTGCTCGACGAGCCACCCCTCCATCCCGATTTCCAGTACTCGTGTGAGAAATTATCGGA  
TTTTAATTACCATCCGTACGAATACGAGGATTGAAGTTGGCAGCACTGAATCCACATCTCTT  
TCGCGTGTTCTTGCGGTGCGCGAGTCAATATCAACGGTAAAAATTCTTTGTTAAACGTTGA  
AGAAGAATTGTTCAGAATTCATGCAGCGGAACGAGTATTCCCGGCAGAATCTGAAGTATTC  
ATCGGGATGATAGAATTTTTACTGAGCTTTGAAACATCGGGAGTTACATCGGTGGAAGCTTT  
TAATTTCTGCATTGAAACATACGTTAAAAACATACGTTCTTGTCACAATTGAAAGAAGAAA  
ATTTTCATCGAGCAAAAGATCTATATGGTTAAATTCCCGAAACAGAGGAGAAATTACAGAT  
CTGTTAAACGTTTACGAATGATTTCAATCGAAACTTCACAAAGGTTAGTTCAGTTATTACCG  
AAATTGTGCCAAGTGCAAACATTATCTCTTGACCCTCGAAAGCTTCGCGCTAATTGGCAAC  
ATCCAGGGGATGAATGCTACCCCCCTTCCCCCTCCATCTCCCCCTCCCCTTCTCTGATCAGA  
CTCTGCCTACAGTGGGGTTTTGAGGATAATAATCGAGAGGCGCACAACTGCACTGGACA  
GCTCGTGTACTCGCCGCCCTTTTCTCTATGAGGCTCTGTGTTTGCACCAGCCACGTATTTCCC  
ATGTGACCCCGTGTGCATTTTCGTGTATAGGTCACCCTACAAATCGTTCGATCGTGTACTCGT

253. >MSTRG.5329.1 Gene=MSTRG.5329

[illegible]

254. >MSTRG.5329.2 Gene=MSTRG.5329

[illegible]

255. >MSTRG.5330.1 Gene=MSTRG.5330

AAAAAGAAGAAAAAAAGAAAAAAAAAAAAAAAAAAAAAAAAAAAAAAAAAAAAA  
AAAAAAAAAAAAAAAAAAAAAAAAAAAAAAAAAAAAAAAAAAAAAAAAAAAAAAAAA  
AAAAAAAAAAAAAAAAAAAAAAAAAAAAAAAAAAAAAAAAAAAAAAAAAAAAAAAAA

AAAAAAAAAAAAAAAAAAAAAAAAAAAAAAAAAAAAAAAAAAAAAAAAAAAAAAAAAAAA  
AAAAAAAAAAAAAAAAAAAAAAAAAAAAAAAAAAAAAAAAAAAAAAAAAAAAAAAAAAAA  
AAAAAAAAAAAAAAAAAAAAAAAAAAAAAAAAAAAAAAAAAAAAAAAAAAAAAAAAAAAA  
AAAAAAAAAAAAACATAAAAAAAAAAAAAAAAAAAAAA

256. >MSTRG.5337.1 Gene=MSTRG.5337

CGCGACCCGCGAGCGCCTAGTCTCCGTCTGGCCGAGCCTCGATTTCGCACGAGTTTGGGGGG  
GCCGTGCATCTCCTTGCGCCCCGTCGATTATCAAATTTCTATTAGCGAAGGGGAGAATTATT  
CGTTGGGGGGTTCGTCTGCAAGTTGGCAAGTTGGCAAAAGGCGGCTCTGACAGCTGCAGGT  
AGCTGGATAGAACAAAAGATCGGGCGCGAACGGAGGAGGAGGGAGAATAAACGAGGAG  
ACAATCCACGGAATAGCGAACAAATTTATTAACCAAGAATGCGTTTTCTACTTATGATCACA  
AGCTTTAGCTTTCTTTGGATTTTGTCCATCCATACCTATCCAACAAATGGTATGAATATGATC  
TTGAATAGAGATTCCTTATTCTTTCCCGACCAAGCAGAATATGTAAAGCTCGCCATCAAATG  
TCCTGAGAACATGATCCTATGGCCAGGAAGTTCGTGATGTTACAGAGAGGGTGAACAAGGT  
CCCTGCAATATCGATAAAGTTTAACTTTGACCGGAACTGTGGAGACCTGTTTGTTCATA  
TGCGGTATTAAGGGAATAAGTAGCAAGATTCATCGTAAAATAAAGTGTATTACAGATAACT  
GTTGTTACCAACTGGACAGAATTCCTTCAAAAGATGGCAGCATATATCCGGATGTCTTCCATG  
AGATATTTTGAAAGATATATCTTAATCTAAGGATATAAACTTTTCATTATAATTTTATATTAT  
AAAATACAAATAATATTTAAG

257. >MSTRG.5354.1 Gene=MSTRG.5354

CCCCCTTATACATAAAGTGCAGCAATGCCTTCATTTCCGTTTCATTGACATCCTTCAGGAAT  
ATAATTGGATGGGGATGGGTATTCTGAAGGAAAATGCTCTCAAAATATGGACTGCATGCAG  
AGAGTATCGTCTGGTGTGCCTTGAAAGTTTCTCCAACACACGCCAGGGTTACGTCGCAGAG  
TGCTCTCTGGCAAGTAAGGAGCTGAGAACGCTCTGTGAGGTTGGCTGGATGGTTGTTCCACC  
GTAGGCAATACTGTTGGTCCATCTTGTCTATCTCCAATCCCGACCCTTTTCGCAAACTTTTTGC  
CATTACAACGCCACCCGACCCTTAACGTCCAC

258. >MSTRG.5355.2 Gene=MSTRG.5355

GGGGGATGTGTCCGTGCAGCGTACACGTGACCTGCATCCACGCCACCCTCTCTCTCTCTCG  
GCGCCACCCCTGGCCTCAGTCGCGCTCCGCGGCCAACTTGATATATACGGAAAGTTATTCC  
CGAATCGACGTAAGTGTGCCCGTTTCTCGTCTCTCGTCTGAAACGAAAGAAAAGAAAGAGA  
AATAATAAAGAGAAAAAAGGGGAAAAGAACTGAAAAAAAAAAAAAAAAAACTCTTCTCT  
CACCGTTTCATCGCGCGCCTGATCGTCATGACCGGCGAGACAAGTTTAAGACGCTGCATAC  
TCGGCTCGGTGCGAACGATGTAATCAATCAAGTGCCGTTTTATTGCTGCCTGTTGTTGTACT  
GTAAGTGTGATGTGCGCGGATGTACTGTCTACGACAGAGATCGCAGTTACGTGAACGTGAA  
GAGGATATCTCTTGGCCTGTTGTCCAAGGGGAGAAGAATTTCGTCTTCGTAAGATCGCCGCG  
GAAGATTTTTCCTCGTCGTGAGGGGGAGAACTGATCCTCCTTCCGTGCTGCGTGGTGCGGCT  
ACGACAGGCCGACAGGATTTTCATGTTACGAATTTTCAGTAAACCAGGTAACGATGCGCCA  
AACACGCCTGCATCACAGGCAATCGGCGCGTCGATTTTCAGATTTTCATAACGCCCTCGCGT  
CGTCGTCTGTCGTCTGTCGTCTGTCGTCTGCGCGCTGTCGTCTGTCGAGGACAACGC  
GCGTTTCGATTTGCGCGCTCGGCCTTCCTTCCGCGGCCTGGCTGCACGCGGCTGCTGTGCACG  
CTTAGAGGGGAGGATACGCGCCTATTCTGCAGCTCGCAAAACGGCCTACCAGACCTGCCG

259. >MSTRG.5355.1 Gene=MSTRG.5355

164

260. >MSTRG.5409.1 Gene=MSTRG.5409

TCTACATTATGGCGGCGTCTCAAGGAAATAAGATATACAGTTTTATGGAAAAAGAACTAAA  
CTTCATAATGAAGTCGATATTTGTAATTTTGAAAACATAATATGGTTCATCGCGTATATCCAA  
AATATAATAAATTATAAACAATTTTTAAATAATTTAAACTTCAAACGTGCATTTTAATCAA  
TTTACTGCAGTGAATATGAATTTTCGATAGTGTGTCATTGACTCAAAACGAAGTATCAAAAT  
CGACTTAATTTTGTGCTTTATAAAACATTAAGACAATTACTAAAATTTAATTTATTAAAAAT  
CATATGATTGTTTAAAATTAAAGTGAATAGTATATTTGTTAGCCAATTATCGTTATTAAACA  
TATATTTTATTGCTAGTGTGATTTCCACGGAAATGAAAAGATGTATATGACGCCAATGCTTT  
GTTTTCTTTTTGTGCAATACTTTCCGTTGTTTTTAAATGCATATTGAAGTTAAATATTAAACGT  
CATGGCACAAAAAACTTTCTATGTAATTAATACTATTAATTTACGCTTAAAATGATACTAATGG  
AAAATTATTATCGAACACTCGTTAAGATGTGTTTGTTTAATGTTGTTTATCACTGATCACATC  
TTTGCTGAGGTCAGAGAATGATGCCGGTTCATCAGATCAATGTTAATCCGCCTGACCGGCA  
ACCACCTCTGTCGCTTGGTTCTTCCAATAACAATAGCCCTGCTGGTGGTGAAGGTTTACCAG  
AATGGACATCAAAAAGAAATCAACATATCCAACAGTAGTTACAATCATACCAGATCATTATCA  
TTCATCAGTAAGCACATTGTCTTCAAGCAATGATATTTGCAGTGGCAGTTTACGCTATGTAC  
ATCAAGCTTGCCTTCAACAATGGATAAAAAGCTTCAGACACACGTGCTTGTGAATTATGTAA  
ATTCACATTTATTATGCATGCTAAGACAAAACCATTTTGTGAGGTATTATTTATATTTTTATA  
TATTTTCTATATATATT

261. >MSTRG.5461.2 Gene=MSTRG.5461

AAAAAAATTTCTGATTTGAATTTATTTAGTAATCGATAATAATTTAATAAAGTTACTGTATC  
GAATACAATTTCTATACAATACATAACAATACGTATTTCTAGGAACTGTTTATTTTGTAATA  
TATTTTACAGTAAAAATGACGCTAAAACATGTAGTTATAGGCAAGTTTTTTTCTCATTCTGA  
CAAACCTTAAGATAAATTTTCGAAATAATATTGGCTAATAGGTTATATTACGGATGAGGTTAT  
GTAATTGTCTCAGGTGGTGGTACAGGTTTTATCGGAACACAAATAATAAATTCATTGTCTCA  
TAAAGGTGCTTCTTATACATGCATTTCTCGCATGCCTGGGCCTAATCGAATTTTCATGGCATG  
ATTTGGAATGTTATGGTTTACCTGAAAATACTACTGCTGTAATCAATGTTGCTGGTCAGAAT  
ATACTTGATCCAAAACAGCGATGGTCAGAAGGATTTAAACAAAATGTTATAAATAGCAGA  
G

262. >MSTRG.5474.4 Gene=MSTRG.5474

TTTAAATAAATTTTTTCAGTTTGCGCATGGCAACTGATTTGGCGCGTAAATACTATATTACAA  
AATTTCAATCTCCTTTTGAATTTATCGCGCATGCGCGCACCCTGTGCGCACGCGTTCTTCC  
ACGAGTCGGTCAGTGC GCGTCGAACGAGGAGGAAGGAGGTATCGTATCGGCTTGTGCTCCT  
TCTTTCACGAATATTTTCGGTATTTCTTTCGAATTATAATTTTTTAATTACCGAAATCATCGTG  
GCGCTATCCGCCTCGAATTGTCTAACGTGCTTGTCAAGCCGAGTCACGATTACGAAGTCATT  
TATTCGCGAATGTACAAACGTGAGTGT CATATCCCGCGTATTTGTGCGGTCAGTTCGTGAGT  
GTATCGCGAGTGTTCGCCACGGGAATAATTATGAGTGCTATGCTACCGATATTATGTGTTAT  
CCTGACCCTTAGCGTCACAACGACTACGGTGC GCGCCGGATTGAAATGTGACGCTGTCAGA  
TCGTACTTCGAGTCGCAAGGTTTTCCGGCCACTGACATTCCCAAGGAGGCGATTTTCATGTGA  
GTATCTTATGCGTGCATCCTCGATACGCGCGGAGATAAAGATCAACGATTCAGTTATCGTCC  
ACCTTCGAAGAAGAGGAAGAAAAGAAAATGGAGGAGGATGAAGCTATACGATGCTAGGA  
GAAAATTGTCGATCAAAATTGTTGTTATTGTTGTTTTTATTATTATTATTATTACTTTCTTT



GTTGTTCCACTTCTTGTTTCGCAACAATATTCGTGCATTTTTATTTTTATATTTTATTGGTGCTTC  
CGGG

265. >MSTRG.5505.4 Gene=MSTRG.5505

CGAATATATATATATGTGTGTATACGTGTATACGTATACGATGCGCACAAACACGGAGTTATC  
AATAATTCATGGGAGCCATGATCGGTGACCGGCTGGCATTATGGTACACGAATACCATT  
CTCCGTTTCAGACGCCGCGCCGACCATCGCCGATTTCGTTTCAATCAACGAAAACGACGGGAC  
GACGCGTCAACAGTGATGCGAGTCCGTCGCGTTCCCGATCGCCGACCGACCACACGAATCG  
TCAACGTTTCGAGGAATCGTTGGGCGCTACGTTATGAGGCACGAGATCGACTCTCGTGAGT  
GGAACAGCACTCGGGGAGATTGAAGTACGTAACCTTTTCATTCGATACTTTGTACGTAAACG  
TCGTGATCGATCGATCCATCGATCGAATTATCATTTCGAAAGAAATTTAAAATTTCTCTCGA  
AATTCGAAACAATTCTATTTTAATAACTCGAATCATTTTCACAGAAATTTGAACGAATTTT  
GAAGTTTATATTAATTTATATTAATCATTGAATAGTTGTATTGATTATTTTACAGAAATGAAATCG  
AAGGTACGATATATATTTTATACTAATGTAAATATCGTGCGGATTGCATCAACGAATTTTGA  
AGTTTATATTAATTTATATTAATCGTCGATTGAATAGTTGTATTGATTATTTTACAGAAATGAAAT  
CGAAGGTACGATACTTTATACTAATGTAAATATCGT

266. >MSTRG.5517.4 Gene=MSTRG.5517

CCTAGTGACATCTTTTCATTAAACGAACATTACTATTTCTATTTCTTTTCAATTGGCATATTAT  
ATCCGGCTTACAGAAATTTTGGCGAGTAGACAGTTGTTGCATCAATCTGACAATCTGTAAC  
GAGTCAAGGAACAAAATACCTATCAGAATGTCAACTTTTCTTGGGCTTATTAAGGAGATAC  
CTGGCATCTCAGTGGATCGTTTTGATGGAGCAAACCTAACATCTTCTATATTTTTTCTTAGTC  
ATTGTCATTCTGATCATATGCATGGTTTATCAGATATGTTTTTTGAGCATATAGATGAATATA  
ACAAATATCTCTATTGCAGCCCTATTACA

267. >MSTRG.5528.2 Gene=MSTRG.5528

GCTCGACAGATGGCGAGAGCATTAGCTCAGTCCCTGCTACGCACCCGCTGTTTCGCCATTGT  
ATCGTGATTGCTGTAAAGTTTCGTGTTTGTGAGTGAGAAATTCATCCGGTTTATATCAAGTTCT  
GGAGTTCTTTTACGCATCGGAGAGTTCAAGTTGCAAGGGAGAGACGTTGTGAGAGCGAAGC  
GCAGGCAGTAGCTCAAACAGGGTTTACTGCCGATCCATTCCGGAGGGAACCGCGGCGTAC  
ATCGTTATTGAAATAATGAAGAGAGAAGCTGATGCAGGCGCTATGACAGGTTCTGGAGGA  
CCGACGAGTCCTCACAAGCGTTACAGACAGGGTGACGATGAACTTCGTCTTCTGATCCCCA  
GCAAGGTAGCCGTTTCGATAATCGGCAAGGGTGGCCAGAATATCACCAAACCTGAGGAGTC  
AGGGTGCTTACCATCAGCTCGGATCTGCCCACCGTACTCCAAGTGTGAACGAGGTCGTAC  
CTAATCTCGAGGAGAACGGATCTCGACACGGGAGCGACGAGATCGACGTGCGCATGCTGG  
TGCATCAGAGCCAAGCCGGATGCATAATCGGCAAGGGAGGTTTAAAGATCAAGGAGCTTC  
GCGAGAAAACCTGGGGCAAGGATCAAGATTTATTCTCACTGCTGTCCCATAGCACTGACCG  
GCTGATCAGCATCTGCGGAAAACCGACCACTTGCATCGAGTGCATTCGCGAGCTGATCGCC  
ACTATTAACCTCGCCTCTGAAGGGAGTGAACAACCCTTACGATCCGCACAACCTTCGACG  
ACTATTACGCGGACGACTACGGCGGCTATGGGACCGGCGACGGCGGCCAAG

268. >MSTRG.5536.3 Gene=MSTRG.5536

GAGATTCAAGTAACGGAAGATCGGTTCTCTGGTCCAGCGCGGTCCGCGTTCGCGTCTCG  
TATCCTTTTCCTTCTAATGCGTGATCCTCACGATCTATCTGTGGATTGGATCGCGTTACGCGG  
CCACCACGTGTCAGAGGAATCGCTGCATCAGTCCGGAAGTGTGAAGTGCCTGAAAAAAG  
TGTTCTCGGTCCAGTGTGTGCGGTGTGTCGTTCCGAGGCCAATTCTGATGAGATTAAGAAG  
GTTGCGTGTATCTGTGCGATATAATTCTCCTGTAGTTGGTACTGGAAACAGAGAACGCGTT  
TCTCTACCACGGAAGCATTTTTTTCCATAATCTTGGTGATTTTACTTTGAACTGATCCATT  
AACGAAGTGAGAATAAGCTGAACAGTGTATGAAGTCACCTATCGTTGTTAGTTTCGTTGAAT  
AGGATATAATCGAGCGACACGCAGTGTAAACAGTGATTTCGATGTGGATTTTTTGTGCGGTCTCG  
AATGATCGATCGGAGTTCCTGTCTTTAGATGGTGGCTCGTCGAAATTGCTCGGATTATCGAT  
ATGTTTCGTATTAGGTACTGATTCCTGGAATAATAACGTTTCGTTCCATTTCGAAATTCTCTCG  
AAACGTGTGACACAATTTTCTGGAACGGTGTATATACGAGAAGCAATAAAGAAATGTC  
CGCGTAATAACGGAAGAAGAAAATTTGAAAAGCTTTGGTTCGTCCAAAGAGTAAAAAAGA  
AAAAGAAAATAAAGAACAGTGGTAAAACGGTGGACGTAATTCGACAGCATCCGGTGCCTT  
CTTTTCTCTATCCGCTCCGACGAGCCGGGTCGTAAGGATGAAGCGAACCGGTAAACATCGG  
AGCCATGGCTTTTCTTGGGCATCATTAGGGCGGGCGCTTTTTTATTTGTACCGCCATATTA  
CATGCTATCAGAAACGAGATCGTTTTTTTTGTAACCTGGACGATATTTTCAAATGATTCCAC  
CCATTCTTGGGTTTTCTCAAACGATCAATTTACCTCTCCAACTTGATCCAATCATATTT  
TTACATCGAAAAATCGAAATATAATATGCCATCGAAAAACATCGTATAAGAAATAACAAC  
AGAGAAGCATACTGCGCAATATTTATGTTTCATAACGTTTCGCTTGGGAAATGTCTACGTCCG  
CATGTTGACTATTCGCAGGAAGGTAATCAGCGAGTTTTCCAAGAAAGGTGGATAAACATTG  
TTTTGAACGTAAAAAGGAACTTGGTTTACATAGCAAACCTCGTTCAACTCTCGCCGATAATA  
ACATCCAACGGTATCTCCAGAATTATAAAGATGACGTAAATGTATTCGTACGAGAATTCGA  
GCGTGATCGCGTTGAAACGGACCCTTCGGGCAGTCATTTTGAATATCGTGAAGCTCGTTTC  
GAGGCCGATCGTCTACTGATGCATCCTGGACGCGCACCAGGTCCTCGTGGCGACGAGGTGG  
GCACGATCGCGCGCGTTCCAGCCTCCGGGGCCGGGTAGAAGTGTTTCGAAGGGGGAAATGA  
AATCTTCGGTTCGATTTCGAGTGATCGCGAAAGGAAGCAGGCGTGAGACGGGGTTTCAAG  
GGCGCGAACGAAGATGACGTCGTCGATCCTGGCGCTGCTCGGCCTAATCCTGGCGACCGCC  
AGCGCCGAGCTAAGCTCAAGGATCGTCAGGACAAAGTACGGGGATCTATCAGGCGTTATC  
GTGACCCTCGATCGCCACCTCGAGGGCGTCGAGGTGTTTCGTGGCGTTCCGTACGCGTCGCC  
GCCGATCGGCTCGTTGCGTTTCATGCCTCCCGTGAGCAGCGCGTTGTGGCACGGCGTTAAAG  
TGGCGGACAAATTCGACCGGTCTGTCCCCAAAGGCTACCCGAGCTCAGTGACAAAATGC  
CGAAAGGAAGGTTCGAATATTTGAGGAGATTGCTGCCCTATCTAAGGAACCAGAGCGAGG  
ATTGCTTGTACTTAAACGTCTACGCACCGGTCCAAGGTAAGAACGAAACGAACGAGTGATC  
GAGTGATTCCGTTCGTAAGTGGAAAATTGGACGTCATTTCTCGGTTTAGAGGATACTTTGATC  
ACGGTGACGCGCGAGGATAGGTAAGGAAGTAAGTACTTTATCAACGGCAGATCCAGGGAT  
CGGATCACCTTTGATCCCTTTGACGAGATTAGATCCATTAATGTGAAGACTGGCGCATCCT  
CATCTA

269. >MSTRG.5546.1 Gene=MSTRG.5546

AAAAAAAAAAAAAAAAAGAAAAAAAAAATGAAGATTACGAAGCTTCGTTTTTCATAAAAAA  
AAAAAATTCCTTTATCATTAACGTAGTATTATTTTTACAATGCGATTCCGTGTTAATCACA  
TAAAATTGTCTTCCTCGTTCTTCGCTCGCGATTCACTTTCGTATCGAACTGCATTATGTTAT  
ATATATATACACATGTATGTCTTCTCATTGAAATCTCATTATATTTCTTTTTACGATTATTAT



270. >MSTRG.5604.2 Gene=MSTRG.5604

271. >MSTRG.5615.1 Gene=MSTRG.5615

169

AATCGAGAGGCGAGAACGAGAGAGAAACGTACGATAAGTAGATCGAGGCGATCGCTCGC  
TTCCCTTCCTTTTTTGTCTATAACCGCCCTCCCCGTACACCCGCGATCGATTCATTCCCTC  
GCCTTGGGATAAACGATTCTTCGTGGTTCGAGCGGCTGCTAACCTTTGAGCGCGGTAAACAG  
CAAGGCAAACATCGTTACCTTAGCCAGGAGTGGGTTCTTCCTTGGCGATCGTTTCATTTGGG  
AGGAAAAACCTCTCGAGGTTTAAGGAGGGAGGGAGGGAGGGGAAATCGTTCGATTCGAAC  
GCGATCGAGGAAAGGAAAACGCGATCGAGAGGTGGGCACGCGATGGATGGTAGATGGAC  
CTAGGGGAGTAATTAGGCGCGAGGGGTTGAAAGGCGGGAACGATGACGATACTCTTCCTC  
CAGAGCTCGTGGAAAAAGGAGAGTCGCGAGAAACCGGGTGGTCCTTGGGATTTCGTGTAA  
TTAGGATCGCCGTGTAACCTTGCAGTTGGCACTCGAGTAGCCAAGAGCGGGTCTCTGAATTT  
TTAATTTCAACTCGTACTCGCCGAACATTCTCTCAAAGAAGAATCCGTGCGTGCAACTTTCT  
CTTCCGAACATGATGCATCGTGTCTTTGAGAAGAGAGAGATAAAAAATTAATATTTGAAA  
GTTTTCTCTTCGGATTCCGAATAAAATTCGATTTTTTCAGTAGAAAGAGCAGCACCGGGGAA  
ATAGAGGAGACCGAAGAGCATTCTGTGAGATGGGAAGATTTCAAGTTTGATCCGAGAACAC  
GTCCGAAAAGTAACCTGGCTTAATCGTTTCAACGATGAATCGGGAAAACGAGGAAGTACG  
TTCAATTCCAATTTTTCATAACTTTATTCGAAAAAGTAAACGTGCCGCGAAAGTGAAAGATT  
ATCTGAACCGATGATATATGTCTGTGTAGCAGCGACCAGTCTCCCAAACCTCTTTGCGGGGC  
GTTGCAAAAAGAACCGAATTGCAAATGTTTGGTGTGTCTGTGTTGATATACGGATGTCTTG  
CCGCAGTGACGTGGTGTAGATGCGCGAATGTCACCAAGGTGATAATCAATTTCTCGACGTA  
TCCGATTAAGCACGAGACATGTGTCCCCTTGGCAGCATGGCTATATATACATCCCCGTA  
AGTAATCGCAAATTAAGTAAATTTCAAATTTTAATTCCTTCGTAAAAAATCGAGGAACG  
AATATTCCTTATATTATTTGAAAATTATGAAAAGGAATTACGAATACGGAGATTGTTTTTC  
AGGTGGCTTTCATGGGGATGCTGTATCTGGTCTATCTGGTCGAGTGTTATCACTCGCCGATC  
AGAATCGATCTGTTACACGCGGAGAGCCAGGACAGCGTGTGTGCGAAGATAACGCAGTTG  
AAATTGGCGCAACCGACTATATGGTGGAAGGCTGTCTCCTACCATTACGTGCGGCGTAAAC  
GACAAATTACCCGGTACAGAAACGGGGACAATTACACGACGACGCAGGTAACGCATAGC  
GCGCAACGTGCAACGCACATCTCGTAATCCAGACGAAAGGAAATCGCGGGATGGTCTATT  
ACGAGAGGATAAACACTCACGCCGCGACATCCTTCTATTATTACGACTACTGCGGGGTGAA  
AGACATCAGCAAGGAGTTGATCCTTGATCCAAAAGTGCCGATCACCAAGATCAATCTCAGC  
AAGGGATTTCGCTTTTCGAACATGAGATCGGCGACCGAATTCGAGGATGCCAGATCGAGAT  
TCTTCGCCCAGCAAGAATTGAGAGACGATTACATGGAGATGAGAGAGGGCCTGGATCTCG  
GATACAATCCGAATCCCACGACGCTTGTGCGCGTTCTCGGCAATCCTTGGTTCACCAATCGC  
TACGTGTACTGGTGTCTCAGCGCTCTGTTGCTCAGCTGGCCCCTGAGAGTGATCATAGAGTA  
CAAAACACAATACGCCGATTATCAGGTGACTATCGACTATCGTTCTACGCAATATCCCCC  
AATATCCCTTCTTTTCTCTCTCACCAAATCACCAGATCACCAAACCTGTTTCGGAATCAACTAC  
GACACACCGAGCGGATGCGAGCCGATACACGCGTCCATGAGCCAGCAAACGATCAATCAA  
CCGGGCTCTTACATGCTGGCCCCGAGCTACAGCGAGGCGCTTCTCATGGATCCAGCACCCG  
ATCACCGTCCATCTTCGACGGAGGCCCAACAGGAGGAGGAGGCCATAACCGAGATGGTGC  
CGAGCTATTCGGAAGCGTTGCTCTATCGACGAGCGGATCAAAGCTGCGTCTCTGGATCCCAA  
CGAGGATTCGAATCGTCCAACGTCTTTCTTCGAGTGTTCTGTCCGTGCCACGCGGCCTCCG  
TTCTCGAAACAGGCGCGCACGAGGAGGACGACGACGCGACCGGGCTGCCGTTGATGGGGA  
CGGCGGCGCGCGTCGAGGCGCGTCCCCCTCCACCTCGACTTGCAGGACGAGCGGCGATG  
CGGGAGACACTACGGCGAGCGGGAAGTGCGCGAGTTGTGGGAAATACTTGGTCGAGGCGC  
GGCTGGAAACCGCGGAGATGTGGTCGACGAGCGAGTGTAACCATCTCGGGCTCGAGGAGAG

GGTTCCAAAGCGTGAGAAGGGGGCCGAGAACGATGGCTACGGCGATGACCATGCCTCGTG  
ACATGTCCGAGCCGAATCTCAGATCGAGGTCGGAATCGTTGGAGGCCGACACGAGATTCTT  
GAGATTGAACGGGCAGAGTTTGAGAAATATATTGGAGAGCGAGCAGGAG

272. >MSTRG.5615.4 Gene=MSTRG.5615

TGCCGCGTCCGCGAGCAAAGCGTATCGACGACGGTGTCTAGTTCAGCCGTAGGGGTAGCATCG  
GGGTGGTTCCAGCCGAAACTACGGCTCCGACCGTCTCTCACTTCCGCTTCGCCCCGTTTTCCA  
CCATTTTTTTTTTCCATCATCCTTCGCCTCTCTCTCACTCTCTCTCTCTCTCTCTCTCCCTT  
CGATCGTTGTTCTTTCCATCATCGACGTGTGTATATATATATACACGTTTTTGCGACAATCCG  
TATTTTCGTCAAGGGAGGGAGGATATATTGGTGGTGGATCGAAGGTGGAAGGAAGAGAGA  
GGAGAGTGAGATGAGAGACGAGGAGCACGGGAAGGATGTCGAAGAGGAATCGAGAGGC  
GAGAACGAGAGAGAAACGTACGATAAGTAGATCGAGGCGATCGCTCGCTTCCCTTCCTTTT  
TTTGCTCTATAACCGCCCTCCCCGTACACCCGCGATCGATTTCAATCCCTCGCCTTGGGATA  
AACGATTCTTCGTGGTTCGAGCGGTGCTAACCTTTGAGCGCGGTTAACAGCAAGGCAAAC  
ATCGTTACCTTAGCCAGGAGTGGGTCTTCTTGGCGATCGTTTCATTTGGGAGGAAAAACC  
TCTCGAGGTTTAAGGAGGGAGGGAGGGAGGGGAAATCGTTGATTGGAACGCGATCGAGG  
AAAGGAAAACGCGATCGAGAGGTGGGCACGCGATGGATGGTAGATGGACCTAGGGGAGT  
AATTAGGCGCGAGGGGTTGAAAGGCGGGAACGATGACGATACTCTTCCCTCCAGAGCTCGT  
GGAAAAAGGAGAGTCGCGAGAAACCGGGTGGTCCTTGGGATTGCTGTAATTAGGATCGC  
CGTGTAACTTTGCAGTTGGCACTCGAGTAGCCAAGAGCGGGTCTCTGAATTTTTAATTTCAA  
CTCGTACTCGCCGAACATTCTCTCAAAGAAGAATCCGTGCGTGCAACTTTCTCTTCCGAACA  
TGATGCATCGTGTCTTTGAGAAGAGAGAGATAAAAAATTAATATTTGAAAGTTTTCTCTTC  
GGATTCCGAATAAAATTCGATTTTTTCAGTAGAAAGAGCAGCACCGGGGAAATAGAGGAG  
ACCGAAGAGCATTCTGTGAGATGGGAAGATTTCAAGTTTGATCCGAGAACACGTCCGAAAA  
GTAACCTGGCTTAATCGTTTCAACGATGAATCGGGAAAACGAGGAACAGCGACCAGTCTCC  
CAAACCTCTTTCGCGGGGCGTTGCAAAAAGAACCGAATTGCAAATGTTTGGTGTGTCTGTGTT  
GATATACGGATGTCTTGCCGCACTGACGTGGTGTAGATGCGCGAATGTCACCAAGGTGATA  
ATCAATTTCTCGACGTATCCGATTAAGACACGAGACATGTGTCCCCTTGCGACGATGGCT  
ATATATACATCCCCGTGGCTTTCATGGGGATGCTGTATCTGGTCTATCTGGTCTGAGTGTTATC  
ACTCGCCGATCAGAATCGATCTGTTACACGCGGAGAGCCAGGACAGCGTGTTGTCGAAGAT  
AACGCAGTTGAAATTGGCGCAACCGACTATATGGTGGAAGGCTGTCTCTCTACCATTACGTG  
CGGCGTAAACGACAAATTACCCGGTACAGAAACGGGGACAATTACACGACGACGCAGGT  
AACGCATAGCGCGCAACGTGCAACGCACATCTCGTAATCCAGACGAAAGGAAATCGCGGG  
ATGGTCTATTACGAGAGGATAAACTACGCGCGACATCCTTCTATTATTACGACTACTG  
CGGGGTGAAAGACATCAGCAAGGAGTTGATCCTTGATCCAAAAGTGCCGATCACCAAGAT  
CAATCTCAGCAAGGGATTTCGCTTTTCGAACATGAGATCGGCGACCGAATTCGAGGATGCC  
AGATCGAGATTCTTCGCCGAGCAAGAATTGAGAGACGATTACATGGAGATGAGAGAGGGC  
CTGGATCTCGGATACAATCCGAATCCCACGACGCTTGTGCGCGTTCTCGGCAATCCTTGGTT  
CACCAATCGCTACGTGTACTGGTGTCTCAGCGCTCTGTTGCTCAGCTGGCCCCCTGAGAGTGA  
TCATAGAGTACAAAACACAATACGCCGATTATCAGGTGACTATCGACTATCGTTCTACGCA  
ATATCCCCCAATATCCCTTCTTTTCTCTCTACCAAATCACCAGATCACCAAATGTTTCGG  
AATCAACTACGACACACCGAGCGGATGCGAGCCGATACACGCGTCCATGAGCCAGCAAAC  
GATCAATCAACCGGGCTCTTACATGCTGGCCCCGAGCTACAGCGAGGCGCTTCTCATGGAT

CCAGCACCCGATCACCGTCCATCTTCGACGGAGGCCCAACAGGAGGAGGAGGCCATAACC  
GAGATGGTGCCGAGCTATTCGGAAGCGTTGCTCTATCGACGAGCGGATCAAAGCTGCGTCC  
TGGATCCCAACGAGGATTCTGAATCGTCCAACGTCTTTCTTCGAGTGTTCTGTCCGTGCCAC  
GCGGCCTCCGTTCTCGAAACAGGCGCGCACGAGGAGGACGACGACGCGACCGGGCTGCCG  
TTGATGGGGACGGCGGCGCGCTCGAGGCGCGTCCCCCTCCACCTCGACTTGCAGGACGA  
GCGGCGATGCGGGAGACACTACGGCGAGCGGGAAGTGCGCGAGTTGTGGGAAATACTTGG  
TCGAGGCGCGGCTGGAAACCGCGGAGATGTGGTCGACGAGCGAGTGTACCATCTCGGGCT  
CGAGGAGAGGGTTCCAAAGCGTGAGAAGGGGGCCGAGAACGATGGCTACGGCGATGACC  
ATGCCTCGTGACATGTCCGAGCCGAATCTCAGATCGAGGTCGGAATCGTTGGAGGCCGACA  
CGAGATTCTTGAGATTGAACGGGCAGAGTTTGAGAAATATATTGGAGAGCGAGCAGGAGG  
A

273. >MSTRG.5651.1 Gene=MSTRG.5651

ATTTGTGCTATTTCTTCTTCGCGTAGAAGAAGGCTAGATCTATTACCCATATTTTCTTTGATT  
GATCAGGAAGTGACGTTTCATACAGCATAGTGTCACGTAGCGCCTCAGCTTCTGACGAGCG  
TAGTTTTTCGTACGTCAAATATAACAGTTTGTGAAGCGTTCTTCATTTATACATATTTTACAC  
AAATACAATGGATCAAGTGAAGAACTTACCGAACCTGGACGTCAATTTGCGAAAGATAG  
TATTCGTCTTATTAACGATGCACAAAACCTGATAGGAAGGAATTCAGAAAATTGCCATT  
GCCACTGCCATTGGTTTTTGCATAATGGGTTTTATAGGATTCTTTGTCAAATTAATTCATATT  
CCAATTAATAACATCATTGTGGGTTTCATAAACTCATTGAATAGGTATATTTAAGATTTAATA  
AGATTATATTTCCCTTTTCCAAAGTATCTTTATTTATAAAAATAAAATTATGAATTTGT  
TTTGAATTGATTGTGACTGAGATATGAGAATGTAATATTAATATTATTGAATTCTATAATAA  
AATGTGTGTGTAGTA

274. >MSTRG.5728.1 Gene=MSTRG.5728

ATTACGACGCCACATTTTTTCGGCGTTTGGCTATTACAAAGCACGAGTGTATTAAACGTTGCT  
TGTTAATTTTTGAAATTATCACAAAATGTCGTACAAAGGACCTCAAAAAGTTCAAAAAGT  
GATGGTACAACCCATCAACCTTATATTTGATACTTGCAAAACCGTTTCGCGCGTGCAAGTTT  
GGTTATTTCGAGAACATCAACCTACGTATCGAAGGTCACATCGTTGGATTTGACGAATATAT  
GAATTTAGTACTGGATGATGCTGAGGAATATCATTTGAAGACAAAGAACAGAAAACCACT  
CGGACGAATCATGTTAAAAGGCGACAATATAACGTTAATACAAAATACGAATCCAGGAGC  
GAATTAAGTTACTCATAACCTTGGAGGATGAACAAAAAAGTGCATTGTTTTATACTTTGTGC  
TATTGAGCATGTAACTACATGTTGTGTACAAGTGACTTAAAAACATTTAATAAGGGCAAA  
GTTAATATCTTTCAAGTTCACCATATTTGTGATACATAATTCAATGTAATTAGAAAGAACAA  
TGGTGTAATATTGTGATTGAGC

275. >MSTRG.5737.1 Gene=MSTRG.5737

TTTCTCTTTCATTAAAAATAATTCAATTATTTAATTTCCAATCTTTGAACGTTCCACTTGCTCA  
TGTTTTACTATTATATACATATGTTATATACTATTTTATATACGCTGTGCCGCGATGTTCC  
TCGTTGAAAATTCGGATGGAAAGTATTTCTATACCGAAATACGTAAAAATAAATGACGTAA  
AAATATCGTCGACCAAGACTGCGATTAAAGCAAATACCGCAAAGTTTTTGTCAATTAAGGC  
AATACGTTTCGTTAGGCTTTTCCTTCGGACTAGTTGTTTAAAAGAGTATATTTTCACGCACATTA  
TTGCTTGAATAAAAATACTTGCTTAAAGCCGAGGGAGTTTGAGAGAATAGGGGGTCGATTC

AATTTTCGTAAAAATCGAACGAGTTTGAAATTTCCCTTCGTGCGATATATTCCTGGTGGCCT  
CTAGTTACCTAGGTCAGACAAAACGTCGAGCTAGTCTCTAGACGCTAGTCTTTACGCTGT

276. >MSTRG.5747.3 Gene=MSTRG.5747

GTTGCATAAAGCGCGCAAGAAGTATGGAAGTAAATTTGAAAAGTTTAAACGAAGCTTAATT  
CAATGAAGTTGACAGATTTCACGAGACAATAATCGAACAGTGTACAGCACAAAGTAGAA  
AATTTCCCTCAACTACTTTTATATAAAGGAATCAACTATATTCTACCAACTTACTCAGTCTA  
CTACAACTCTTCGATCAAGCTTGACAAAAACGCTCGAGAAGAGAATTTGAATAGAAGCGTC  
TCGAAAGATGTTTAAACGGAGCATAATTCAACAAGAAATTAACAAATTTCTAAGGAGTAATA  
ACCGAATGGAATAAAAATTAATATTCAAAATTTTCTCAAGATCTGTCAATGAACGCGAGT  
AGCTACATAGTGTCAAGTGGTGTCTCGTCTGATAGTCGGAGCACTGGTGGGTGTCTTTCGAC  
GGTATCGCATCATCTTCATCATCGTAGGCTGCTACTGCACGAGCCTGCTTCCGCCTCGATCT  
TGCACCACCATCGGCATCATCATACCGCCATCATCATCATCATCATCATCGCGAGGAACCT  
CCGGCGTCGCACCAACGACGCCTCCTGCTGCAGGACCACCACCGTCATCCTGGGACGCCG

277. >MSTRG.5776.3 Gene=MSTRG.5776

CAGAAGTACGTTCACTCGATAGGACGATTGTCGTCTGGCGCACGACAAGCTTCAAGCAATA  
TGGCGAAGTGTGTCATGGGCTCGGTGAGACGTAAGTGTCTTTGAAAAGATGAAAAGTTTCG  
GGAATGGGTTGAGAATAATGTAGCGCTATGAAGATCGTGTGAATATTATATTTGTGTATTCA  
AAAGCATTGAGTTGTTCTTGTGATCGGGATATACAGTGCAGCGTTACCGGTGTGAAATCATG  
GCTACGGATAAAATAAAGGTTGCCGTTCCGGTTCGCGCCGTTCAATCGTAGAGAGCTGGAAC  
TCGGTACACAATGCGTGGTCGAAATGTCCGGACAGCAAACCATCCTTCAGCATCCCACCAC  
GATGGACAAGATCGAACGGAATTTTCATCCCTGGATCTTCAAACGGATTTTATTTTTGTC  
GATTACAACCTTCTAAATATTTAATTATACAACG

278. >MSTRG.5788.1 Gene=MSTRG.5788

ATGCGTAGTCACCTCCTCGTCGGTGAGACCCGGTAATTGGCATCGCTTTCCAAAATCATATT  
TCACAAAATTTATTATTTTTCATTAAAGTTTTCGAAATATTTTAAAGCTTAAAAATATGAAATA  
TATTTTCATGAATGATAGTGTATGGAAAGCGATGGCAAGCTAAGAACTACGAAATCTGCAG  
TCCAGTGTAACTTTGCATAATTCATTTAATTATTTGACTTTTAATTTTTAATTGTTTAACT  
GGACTGCAGATATTAGAATAAGTTTATTGTAATAAGTGCCTTCCATCCGTATCAAGATATA  
CTCCATAATTTAAAGCGAAAATAAAATTTTTTAATTTTTTTTACTCCTTTTTTATATTCTCGT  
TTTTCGTTTTCATTTTCGAGTTTTTATTTCGTATAATTATTGCAATCGTTTGTTACTTTCTCCTCA  
AAATATCCTTTTAGTTATTTTATATTTTCGTCTTCTTTTCGTCATTATTCAAGTCAATCTCC  
TGTCATGCAACAGTGGTCGAAATCGTTGGGCCGGTGCTCTACTTCCGGTGGCCAGTTGAGG  
GTCCGCGCTCTAATCGATTGGTACCTTGGTACTCGATTAGAGTTAGGTCTTGTGGTGGAACG  
T  
CGTCTTTGTAATCCGGCTCAGGTGGTCAAGGATTTACTCCTTGTTCCTTCCGTGTGTCGTTGGG  
ACATAAGATGTTTGGCTATTAGGCCGCTGTCGTAACCCTCGATTGGTCACGACTGGCAAGT  
ATCATCTGTCCATCGATTTTCGTAAATCCATTGATGTAAGTCGTGATATGAGAGCGACAGAT  
AAGGGTTGATTTTTTCATCGATCACGTATCTTAAGTTCTTCTTCAAATGCTTATCATTTTTCTTAG  
CCTGCATTTAGTTGCTTTTTTAACTTTTTAAGTTTCCTCTTTTTTTTGTGTGTTTAGTATGAATG  
ATTAGCATCTTCTCCTCAATTTATCCTTTTAGTTATTTTATATTTTTTTCTTCTTTTCGTCGCT

TATTTCAAATCAATCTCCTGTCATGCAACAGTGGTAGAAGTCGTTGGATCGGTGCTCTACTT  
 CCGGTGGCCAGTTAAGGGTCCGCGCTCTAATCGATTGGTACCTTGGTACTCGATTAGAGTTC  
 GGCCTCGTGGTCGAATGTCGTAATTCGACTCCGGTGGTCAGGGATTATCCTTGCT  
 CCTTCCTGTGTCGTCAGAACGTAAATCATTCTTCTGCGAGGCCAGTGTCGTAACCCCTTGATT  
 GGTACGACTGGCAAGTATCATCCGTCCATCGATTTTCGTAAATCCATTGATGTAAGTCGTG  
 ATATGAGAACGACAAAGAGGGTTGATTTCTTCTTTTAATGTATTCTTCTTATTATTTTCTTGAT  
 CTCCATTTATAGTTGCTTTTTGAATATTCTTTCTTTTTTTATTGATGTTTTATTTATTATAAATG  
 ATTTAGTATAAATGATTTTGAATATTTCTTTTTTCGCTTTAAGTTAGACGAGAGTATTCTTGA  
 TACGGATAATATTAATAGAAATATTATGTATTGTAAATTATAAATTTAAGATTTTAAGTTAT  
 AGATTAGGTCATTATCATGGTTGGACGACGTGGGACGACGATGGACGACGATGGACGACG  
 ATGGACGACGTGGGACCTAATCTTTAATTTTATTCTATATTTCTTATAATTAATGCAAGCGTT  
 TTAGATATAATATAATATAAAGGGAAAAATGTAAAAGATTTTTGTAAAAATTTTTTGCATGT  
 TTATTGCATGTTTATTGCATGTTTATTGCATGTTTATTGCATGTTTATTATTTTTATTTTTATG  
 TATTTTATTGTTAATTTTATTGTTTTATTTTTATAATTTATGTAATTAATCTTTATTTTATGTTTC  
 AGATTTGTTTAATTTTTATATAATTTTTTCTTATGTATTTTTTATTTATTAATTTTAGGTCCTG  
 ATGTATAATCATCTCTTCTTTTTTTCGTGACTTTTTTCTCATGAATCATCATGAAAAAATTGTA  
 AGTGTTTCATCGGACTGATGCTCAACTTACGGTGGTCAGTCGAAAGTCCGCGCTCTGATCGAT  
 TGATATCTTTGGATATTTGATCAGAGATAGGTCCTATGTTGAATGTCGCTTCCGGTAATTCGA  
 TTTCACTGGTATTAGAATGATTTTTAGTTCCTTCTGTGAGTCGTTAGGACTATGTCTTGGA  
 ATTTGACTCCGGTGGTCCTGAAATGATTTCTAGTTCCTTCTCGTGGTCGTTGTGGACTCTGT  
 GCATTCAGCTACTAGGCCACTATCGTAACTCTCTGCTGATCAACATGGTTATCATTGTGTTGA  
 TGACTCTTGTAATCAACTATTGTAGAATTTAGATTTTCTTACACTATTTTTTTATTCTGTCAA  
 TAACTTTTTTTTCGTTTGAAATAAAACGTGAATATCCTTAATATCAGTGATACCAATAGGATG  
 TATGACTCTTTGATTTAGTATTATCATTAGGTTTATTATATTAAGATAGATTTAGTCTCATCGT  
 TGGACATTGTAAAAAATATAAAAAAATGCTGTAAAGATTATTGTCAAATTTTATTGTATA  
 ATAATTCAAATGATTATTTTATTTTATGTATTTGTGATTAATATTTCTTTTACATTTTCAGATTT  
 ATTTTATTTTTATATATTTCTAATTTGTTCAATTTAATGATTAATTTTTAATGTTTTTTTTTTTT  
 AGGTTTAGGTGGGTCTCGATGCGTAGTCACCTCCTCGTCGGTGAGACCCGGTAATTGGCATC  
 GCTTTCCAAAATCGTAAATCACAAAATTTATTTTCAATTAATGTTTTTGAAATATTTTAAATTTA  
 AAAATATCAAATATATTTTCATCAATAATAGTCTGTGGAAAGCGATGGCAAGCTAAGAACTA  
 CGCACACCTTCACTCTAGTCTAAAATATGATTGCTTTCAATTATTTTGATTAATTATCAATGG  
 ACTAGACTGAAGGTACTAATAAAAAATCTGAACAAGGATATTCTGGTTAATCCTTTCTTGTTT  
 CTCAATTTTTAACAATGAGCAACGTTATCTCCTTCCA

279. >MSTRG.5788.2 Gene=MSTRG.5788

ATGCGTAGTCACCTCCTCGTCGGTGAGACCCGGTAATTGGCATCGCTTTCCAAAATCATATT  
 TCACAAAATTTATTATTTTTCATTAAAGTTTTCGAAATATTTTAAGCTTAAAAATATGAAATA  
 TATTTTCATGAATGATAGTGTATGGAAAGCGATGGCAAGCTAAGAACTACGCAAATCTGCAG  
 TCCAGTGTAACCTTTGCATAATTCATTTAATTATTTGACTTTTAATTTTTAATTGTTTAACT  
 GGACTGCAGATATTAGAATAAGTTTATTGTAAATAAGTGCGTTTCCATCCGTATCAAGATATA  
 CTCCATAATTTAAAGCGAAAACTAAAAATTTTTAATTTTTTTTACTCCTTTTTTATATTCTCGT  
 TTTTCGTTTTTCATTTTCGAGTTTTTATTCGTATAATTATTGCAATCGTTTGTTACTTTCTTCCTCA  
 AAATATCCTTTTAGTTATTTTATATTTTCGTCTTCTTTTCGTCACCTTATTCAAGTCAATCTCC

TGT CAT GCAACAGTGGT CGAAATCGTTGGGCCGGTGCTCTACTTCCGGTGGCCAGTTGAGG  
 GTCCGCGCTCTAATCGATTGGTACCTTGGTACTCGATTAGAGTTAGGTCTTGTGGTGGAACG  
 T  
 CGTCTTTGTAATCCGGCTCAGGTGGTCAAGGATTTACTCCTTGTTCCCTTCTGTGTCGTTGGG  
 ACATAAGATGTTTGGCTATTAGGCCGCTGTCGTAACCCTCGATTGGTCACGACTGGCAAGT  
 ATCATCTGTCCATCGATTTTCGTAAATCCATTGATGTAAGTCGTGATATGAGAGCGACAGAT  
 AAGGGTTGATTTTTTCATCGATCACGTATCTTAAGTTCTTCTTCAAATGCTTATCATTTTTCTTAG  
 CCTGCATTTAGTTGCTTTTTTAACTTTTTAAGTTTCCTCTTTTTTTTTGTGTGTTTAGTATGAATG  
 ATTAGCATCTTCTTCCTCAATTTATCCTTTTAGTTATTTTATATTTTTTTCTTCTCTTTTCGTCGCT  
 TATTTCAAATCAATCTCCTGTCATGCAACAGTGGTAGAAGTCGTTGGATCGGTGCTCTACTT  
 CCGGTGGCCAGTTAAGGGTCCGCGCTCTAATCGATTGGTACCTTGGTACTCGATTAGAGTTC  
 GGCCTCGTGGTGAATGTCGTAATTCGACTCCGGTGGTCAGGGATTTATCCTTGCT  
 CCTTCTGTGTCGTCAGAACGTAAATCATTCTTCTGCGAGGCCAGTGTCGTAACCCTTGATT  
 GGTACGACTGGCAAGTATCATCCGTCCATCGATTTTCGTAAATCCATTGATGTAAGTCGTG  
 ATATGAGAACGACAAAGAGGGTTGATTTCTTCTTTTAATGTATTCTTCTTATTATTTTTCTTGAT  
 CTCCATTTATAGTTGCTTTTTGAATATTCTTTCTTTTTTTATTGATGTTTTATTTATTATAAATG  
 ATTTAGTATAAATGATTTTGAATATTCTTTCTTTTTTCGCTTTAAGTTAGACGAGAGTATTCTTGA  
 TACGGATAATATTAATAGAAATATTATGTATTGTAAATTATAAATTTAAGATTTTAAGTTAT  
 AGATTAGGTCATTATCATGGTTGGACGACGTGGGACGACGATGGACGACGATGGACGACG  
 ATGGACGACGTGGGACCTAATCTTTAATTTTATTCTATATTTCTTATAATTAATGCAAGCGTT  
 TTAGATATAATATAATATAAAGGGAAAAATGTAAAAGATTTTTGTAAAAATTTTTTGCATGT  
 TTATTGCATGTTTATTGCATGTTTATTGCATGTTTATTGCATGTTTATTGCATGTTTATTTATTT  
 TTATTTTTTATGTATTTTATTGTTAATTTTATTGTTTTATTTTTATAATTTATGTAATTAATCTTT  
 ATTTTATGTTTCAGATTTGTTAATTTTTATATAATTTTTCTTATGTATTTTTTATTTATTAAT  
 TTTAGGTCTCGATGTATAATCATCTCTTCTTTTTTTCGTGACTTTTTTCTCATGAATCATCATG  
 AAAAAATTGTAAGTGTTTCATCGGACTGATGCTCAACTTACGGTGGTCAGTCGAAAGTCCGC  
 GCTCTGATCGATTGATATCTTTGGATATTTGATCAGAGATAGGTCCTATGTTGAATGTCGCTCT  
 TCGGTAATTCGATTTCAGTGGTATTAGAATGATTTTTAGTTCCTTCTGTGAGTCGTTAGGAC  
 TATGTCTTGGTAATTTGACTCCGGTGGTCCTGAAATGATTTCTAGTTCCTTCTCGTGGTCGTT  
 GTGGACTCTGTGCATTCAGCTACTAGGCCACTATCGTAACTCTCTGCTGATCAACATGGTTA  
 TCATTGTTTGATGACTCTTGTAATCAACTATTGTAGAATTTAGATTTTCTTACACTATTTTT  
 TTATTCTGTCAATAACTTTTTTTCGTTTGAAATAAAACGTGAATATCCTTAATATCAGTGATA  
 CCAATAGGATGTATGACTCTTTGATTTAGTATTATCATTAGGTTTATTATATTAAGATAGATT  
 TAGTCTCATCGTTGGACATTGTAAAAAATATAAAAAAATGCTGTAAAGATTATTGTCAA  
 TTTTATTGTATAATAATTCAAATGATTATTTATTTTATGTATTTGTGATTAATATTTCTTTTAC  
 ATTTCAGATTTATTTTATTTTATATATTTCTAATTTGTTCAATTTAATGATTAATTTTTAATGT  
 TTTTTTTTTTTTAGGTTTAGGTGGGTCTCGATGCGTAGTCACCTCCTCGTCGGTGAGACCCGG  
 TAATTGGCATCGCTTTCCAAAATCGTAAATCACAAAATTTATTTCAATTAATGTTTTTGAAATA  
 TTTTAAATTTAAAAATATCAAATATATTTTCATCAATAATAGTCTGTGGAAAGCGATGGCAAG  
 CTAAGAACTACGCACACCTTCACTCTAGTCTAAAATATGATTGCTTTCAATTATTTTGATTA  
 ATTATCAATGGACTAGACTGAAGGTACTAATAAAAAATCTGAACAAGGATATTCTGGTTAAT  
 CCTTCTTGTTTCTCAATTTTTAACAAATTGAGCAACGTTATCTCCTTCCA

280. >MSTRG.5796.4 Gene=MSTRG.5796

GTTTGGCCTTGAAGAGATTTTCACTTAGTGGATTGATTTTATATTTTTATTCTTTTCTTATTGT  
TCTTGATATATTATTATATAAAATTTAGTTGAATATATTTTTAGCATTTTTTCAAAATTATAAC  
GTATTTTATTTTTTTATGTAAAAATATATAGTATCACTTCTAATGGTTATGGCTGTGCCAGAC  
CTGGACGACCTGGAGTCTATACGAAAGTGCATCATTATCTCCCTTGGATTGAACATGTAATT  
TCCAGAGAAGATATTTCGATCTTCAATAGCTTCTTGCAAAGGTCATCGATGTCCTTTAGGCGA  
GTGTTTGCCAAAATCTCGAATATGTAATGGATTCTAGAATGTTTCAGATGGTAGCGATGAAC  
GTAATTGTTCTATTAATTTATAGAAATGAAGACTGATTGTATTTGTATTTATTCGTTCCATTTT  
ATATATTAAACGAACGAATTAATTAATAATAAAATTTCAATATATAAATTTTTGAAAACAATT  
AAAGC

281. >MSTRG.5812.1 Gene=MSTRG.5812

GCCGAAATTTTCGACGTTTACACTTTTTTTTTTAATATCTCGCTTATTATTCACAATATTA AAAA  
ATGTTTCAAATAAAAAGTTGATTGGTTTCTAAAGGGCTATATTATGACGCTCTCAGTTCTTTAG  
TAGGTTGACCAATAAGGAGCTTTTTTAGCACAACTTTGTTTTTTTTACTGACAACATGTATTT  
TTTAAAGCGCCAATCGATAGAGCATAAAATTTCTATAAAAAAGTATTAACCCACTTATAG  
CGAAAAACCAATAGTTTAAAAGATATAGCAAAAATTAAAAATTTGTAGGAGGTCGACCTC  
CTGTCATATCATGTTCTCCTAATACAAAATCGAGTTTTTGGCCAAAAATTTTTCTTCGGTCGC  
CGAAATTTTCGACGTTTACACTTTTTTTTTTAATATCTCGCTTATTATTCAGAATATTA AAAAAT  
GTTTCAAATAAAAAGTTGATTGGTTTCTGAATGGGCTATATTATGACGCTCTCAGTTTTTTTAGTA  
GGTTGACCAATAAGGAGCTTTTTTAGCACAACTTTGTTTTTTTTACTGACAACATGTATTTTT  
TAAAGCGCCAATCGATAGAGCATAAAATTTCTATAAAAAAGTATTAACCCACTTATAGCG  
AAAAACCAATAGTTTAAAAGATATAGCAAAAATAAGAAATTTTTTAGGAGGTCGACCTCCT  
G

282. >MSTRG.5812.2 Gene=MSTRG.5812

TTAATATCTCGCTTATTATTGAGAATATTA AAAAATGTTTCAAATAAAAAGTTGATTGGTTTC  
GAAAGGGCTATATTATGACGCTCTCAGTTTTTTTAGTAGGTTGACCAATAAGGAGCTTTTTTA  
GCACAACCTTTGTTTTTTTTACTGACAACATGTATTTTTTAAAGCGCCAATCGATAGAGCATA  
AAATTTCTATAAAAAAGTATTAACCCACTTATAGCGAAAAACCAATAGTTTAAAAGATAT  
AGCAAAAATAAGAAATTTTTAG

283. >MSTRG.5855.1 Gene=MSTRG.5855

ATCGGGTTGAACTTTGATTTAAACATAAAGCCACTTTGTTTTAAATATTAACGAATGCGTAA  
GACGTAAGATCGAAAACCTATATATAGCGCTGTGTATAGGCGTGTAATACACGAGTATTGA  
TATATTGCACGTACAATCGGATTCTTATATCTCATCATTGTTACGATATTAAAGTTCATCAAA  
GACGCGATAAAATCGTAAGAATCGATCTATACCGAAAGAACTGCAAAAATAAAGTTTAGT  
TCCGTTATTATTCCTTTTCGCCAACTTCTAAATCCGAACCGCTACGCAAAGGACGTATTA  
TTTTTTTTCTTTTATTCCTTCATTCTTATTTCTTTCTTTCTTTCTCTCACTTCTCACGTGTCT  
TTTTTCCATTTATTTTTCTTTCTTTAAGGCGGAGAACGGACAATTAAAGATCAATTTCAAA  
TAAAATCTCTTGTAGACCGAGGTGATTAAATTATTCTTTGATCTCGAAATATTTATATGTAG  
GATTTTCATATCCATTGATTTGCATGTTTGCAACATGCCGCTCCTCTGGTGTGGCCGCTTGAT  
CAACTTCAATAAATCCCTGACTATGAGGGCTTCTTGCACTGCGCCTTTTGAATACTGCTACA



CCTACTACTGCTGCAGCCATAAGTGCAATTCCAGCAAATGCAAGTGTAAGTAGACAGATC  
GACTTTCTCTGTGATACATCTCCCTTCTTACAGAGTAACCCGGTTCAGAATGGGAAATGTCA  
TGTGTCAAACATATGAGCTGCCCTAACAGTCCTTCGCTGTGCATAGCTGCCGGTTGCTCCGG  
TTGTTGTTGAATATCTTTGTTATCATTTATCGAATCGCTTTCTTCTTGTGTGCTTGTCTGTAC  
GTAATTCACCACGTTTACGCTTTGCGTTGCTCCTTGCCTACTCGTTCCAGTTGTTTTTGATGCTC  
TTTTCTTGTGTGCTTACTGGTAACATCGGCCTGATATTTATCTAAAATGGCTGCTTCCGCTTCT  
CGTGTTCATCGCTAACAGCAGTCCAGGAGTCTCATCTTTGCTCCTGAGGGCCAAAACGTAAT  
CATCCATAAGGCGGCCAATTTTTGCGCTTAAATCAGGATACCGTTCTAACATCAACAGGCT  
CTGATTGGTGATTCTATCGATTTCGGCCAAGTGCTCCAACGTTGCTGGTTTCTCACGTTGAGC  
TTGTTCCAAACTGCTGTCCAGCAGATGTTTGTAAATGAGCAATAGTATGATGCCTATCTTTGT  
GAAGAGCACGAAGCAACTTTTGGAGACATTTTTGAATGCGATGCATATTTGGTGGTGTCTCG  
TTCAAAGCAGCTGTATAACATGACATCGCTTCTTCGTTCCCTTTGTTTAAACAGCTTCTTGTACT  
CTTTGCTGATGCATAGCGCTTAATTGATGTTTCTCCGCGGCACCGCTCTCTTCTAGAGCAGC  
AACAGTTTCTGGAATCGCGCGGTTCATCCATCGTTTGAAAGCATCAGCAGCAACTGGGTGCG  
TGGGCACGGATATCTTGATACTTTTCTCGAGATCACTCCAGTCCCTTCATCACTTTTGTACT  
TTCTCCTTGTGCACCTCTTCGAGTCTCATTTGTGCTTGCTTGTAGCTCTGGTGCTCAGAACGA  
GGATCGAAATGAGTTAGATATGGATCCGGTGTGCTCTGTGACTGCGAAGATTGTTGTGTGCT  
GGTACTAACTGGCAATGGCATTGCAGTTACGTCTTGTTCGGTTTTTCCGTGGTTGAAACTGT  
TGTTGATAATCGACTTGTGTAGTGTGTAATTGTAATCATCGTTGAGATATTCCTCGTCACT  
TTCATCATCATCAGGTTGATCATTGAGTCCGTCTTCGGGATCAGCTTCAGAATCATCTTCATC  
ATCTGCATCAGTATCCAAACCATCATCGTCTTCAAGGTCGTCTTCATCTTCGTCGAGATCTTC  
GTCCACACCCTTTGGAATCGGCAAGTCGATCGGTTTTTTGGCTTTCAAATTTCTTTGAGGTG  
TTTCGGACAGCACACGAATTTCGACGCCAGAGAACAAGGATATTCGCGAGGGCAACAGCAT  
TGCAAAGCTCCTCAGATTCATATTCCTCTCTCTGCAGGTGTCTGCTGCGGTGCGATTCCACCT  
GTGAGATTCCCAGCATTTCGTCTGATTGTGAAGGTGGTTCGAACAGGCAGCCTTCCGGAACG  
AGCAAAGCGTCGCTTTGGAACGGCCCCTCGAGACATCTGTACGGCTTGACCCAACGTGACA  
ATTTGCATTTGGTTCTTCTGGCTTGACCATCCGCTCACCTTACATAGTGCGACGACTCTA  
CGATGTTGGTGATGTCTCTTTTCGGGTAAGCCTTCTTGCAATATTCGAGAATCTCCAGCTTGT  
CCGTCATGCAACTCTTCTGTGCGTCGAGGAGACCCAGCGTCCCTGTTCTCCCATGTGCTGT  
GCCAGATACACCTCTCCAGCCTCGCACAAATGTGGCAACTTGCGGCTCTGATCTTCCTCCAGC  
TGGTGCCAACTCGAGCCTCTCCGACACCGCTTGAACCCGGCAGACCATCAAGACGCCCAGC  
AGTGCGGGCACCAGCATCCCCCTTCATCTTTCTTCCTTGATTGACTGTTTCGTAAAACCTCCCGC  
ACGATGTGTCGTTTGGATTCTCTCGTAATGATTCCTGGCTTAGCTCGATCTTCTACGAAGAA  
ACGACGATGCACTGACTAACAAACGCCAGAAACGTTGCAGAACAAATTGCTATATGCAAG  
ACACCACTACCCGCCGTATACGAGAGCACAGCGTACTACTGTGACACTGCTGCTGGGTGG  
GTCGCTTTACGAGAAATCAAGATGGAGGTGAAACGCGGCGCCGGTGCCGCTTCATCTCTTT  
CTTTTTTTTCAGGAAAGCATGAAAACGCACGAGCAGATAGCCTTGCCCCATACCTTTGCCCCG  
TGTGTGCGCCACCGTACCCACTGGTTACCCCTGGAAACGGTATCGATTTCAACCCTCAGCTAT  
GCAGTAGAAACCAGCGGCACACCATGGGGGTCTTTCATCCCGAGTTTCGACAAGACAGC  
CCGTTTAAACTACCCGATTACACCAACCTTCATCTCTATTACCGTCTTACATTTGTTTCGCG  
TACTTCACAAATTCAGTTCTTCAAACGATATTTGAGGTTAGGGGACACTGTGAAATTAACGG  
CGAAATTTGGAATATTACGAATATTTTTTTGATTCAATGATTTCCGCTTTTGTAGGCGGCT  
AATTCGGCGTATTTATTTATGTTAATATAAAATCTTCTTTATTATATGAAAAATATATGTTTA

TAGAAGAATATTACATTCAGTTGAAAAATAAATGCATTACATTGGCTGACACAGAGATCTA  
AATGTCCCAACAATAAATACAACATATTCTATATGTATATATAGC

284. >MSTRG.5855.3 Gene=MSTRG.5855

CTTTCTTTTAGATTTGTTGTCGTCATCATTATGAGCGCTCCTTCCTGTGTTTATTTGTTTATTTA  
TTTTGTTAATAATAACATGTATGACAAACGAAAACAACGTGTATGAGATACTTCCGAAGAC  
AACATTACGCCCTTCCCATAATATGGCACATTGGCATGTTGTTTCCCTTTCGAATTGTCTTGT  
AGATAATTCTGATACGAGCAGTATGAATCGACTCATAACATTTCTATCTACTAGATGTTATA  
TGAAAATTGCTTTATACATATATCATAATAATCGTTATATTTTCGTATAACGAGTCGCGAGTT  
ATTATAAAGAGACGTGACACATAATGATATCGTATCGCAATACCTATTCGTCTATGGACAG  
ATTTTATTCATATATCACTAAGACATAGATTTTTTTTTTTTTTTTTTAAATATATTTTCGGA  
ATCTTCGGAAGAACCTCGAACCTGAAAGATATCTTACACTAACAAAATACTATGAGATTCT  
TGAAGAACATACGCGAGAACGGACAATTAAGATCAATTTCAAATAAAATCTCTTGTAGA  
CCGAGGTGATTAAATTATTCTTTGATCTCGAAATATTTATATGTAGGATTTTCATATCCATTG  
ATTTGCATGTTTGCAACATGCCGCTCCTCTGGTGTGGCCGCTTGATCAACTTCAATAAATCC  
CTGACTATGAGGGCTTCTTGCACTGCGCCTTTTGAATACTGCTACACCTACTACTGCTGCAG  
CCATAAGTGCAATTCCAGCAAATGCAAGTGTAAGTAGACAGATCGACTTTCTCTGTGATA  
CATCTCCCTTCTTACAGAGTAACCCGGTTCAGAATGGGAAATGTCATGTGTCAAACATATGA  
GCTGCCCTAACAAGTCCTTCGCTGTGCATAGCTGCCGGTTGCTCCGGTTGTTGTTGAATATCT  
TTGTTATCATTTATCGAATCGCTTTCTTCTTGTGTTGCTTGTCTGTACGTAATTCACCACGTT  
CAGCTTTGCGTTGCTCCTTGCGTACTCGTTCAGTTGTTTTTGATGCTCTTTTCTTGTTGCTTA  
CTGGTAACATCGGCCTGATATTTATCTAAAATGGCTGCTTCCGCTTCTCGTGTATCGCTAAC  
AGCAGTCCAGGAGTCTCATCTTTGCTCCTGAGGGCCAAAACGTAATCATCCATAAGGCGGC  
CAATTTTTGCGCTTAAATCAGGATACCGTTCTAACATCAACAGGCTCTGATTGGTGATTCTA  
TCGATTTCCGCCAAGTGCTCCAACGTTGCTGGTTTCTCACGTTGAGCTTGTTCCAAACTGCTG  
TCCAGCAGATGTTTGAATGAGCAATAGTATGATGCCTATCTTTGTGAAGAGCACGAAGCA  
ACTTTTGGAGACATTTTGAATGCGATGCATATTTGGTGGTGTCTCGTTCAAAGCAGCTGTAT  
AACATGACATCGCTTCTTCGTTCTTTGTTTAAACAGCTTCTTGTACTCTTTGCTGATGCATAG  
CGCTTAATTGATGTTTCTCCGCGGCACCGCTCTCTTCTAGAGCAGCAACAGTTTCCTGGAAT  
CGCGCGGTCATCCATCGTTTGAAAGCATCAGCAGCAACTGGGTCGTGGGCACGGATATCTT  
GATACTTTTCCCTCGAGATCACTCCAGTCTTTTGTACTTTCTCCTTGTGCACCTCTTCGAGTCT  
CATTTGTGCTTGCTTGCTAGCTCTGGTGCTCAGAACGAGGATCGAAATGAGTTAGATATGGAT  
CCGGTGTGCTCTGTGACTGCGAAGATTGTTGTGTGCTGGTACTAACTGGCAATGGCATTGCA  
GTTACGTCTTGTTTCGGTTTTTCCGTGGTTGAAACTGTTGTTGATAATCGACTTGTTGTAGTGT  
CGTAATTGTAATCATCGTTGAGATATTCCTCGTCACCTTCATCATCATCAGGTTGATCATTGA  
GTCCGTCTTCGGGATCAGCTTCAGAATCATCTTCATCATCTGCATCAGTATCCAAACCATCA  
TCGTCTTCAAGGTCGTCTTCATCTTCGTGAGATCTTCGTCCACACCCTTTGGAATCGGCAAG  
TCGATCGGTTTTTTGGCTTTCAAATTTCTTTGAGGTGTTTCGGACAGCACACGAATTCGACG  
CCAGAGAACAAAGGATATTCCGCAGGGCAACAGCATTGCAAAGCTCCTCAGATTCATATTCC  
TCTCTCTGCAGGTGTCTGCTGCGGTCGATTCCACCTGTGAGATTCACAGCATTTTCGTCTGAT  
TGTGAAGGTGGTGAACAGGCAGCCTTCCGGAACGAGCAAAGCGTCGCTTTGGAACGGCC  
CCTCGAGACATCTGTACGGCTTGACCCAACGTGACAATTTGCATTTGGTTCTTCCTGGCTTG  
CACCATCCGCTCACCTTACATAGTGCGACGACTCTACGATGTTGGTGATGTCTCTTTTCGG

GTAAGCCTTCTTGCAATATTCGAGAATCTCCAGCTTGTCCGTCATGCAACTCTTCTTGTCGGT  
CGAGGAGACCCAGCGTCCCTGTTCTCCCATGTGCTGTGCCAGATACACCTCTCCAGCCTCGC  
ACAATGTGGCAACTTGCGGCTCTGATCTTCTCCAGCTGGTGCCAACTCGAGCCTCTCCGAC  
ACCGCTTGAACCCGGCAGACCATCAAGACGCCAGCAGTGCGGGCACCAGCATCCCCTTC  
ATCTTTCTTCTTGATTGACTGTTCTGTA AAACTCCCGCACGATGTGTCGTTTGATTCTCTC  
GTAATGATTCTTGCTTAGCTCGATCTTCTACGAAGAAACGACGATGCACTGACTAACAAA  
CGCCAGAAACGTTGCAGAACAAATTGCTATATGCAAGACACCACTCACCCGCCGTATACG  
AGAGCACAGCGTACTACTGTGACACTGCTGCTGGGTGGGTGCTTTACGAGAAATCAAGAT  
GGAGGTGAAACGCGGCGCCGGTGCCGCTGAAACGATTGACCAATCAAAAGCTGTCTACTA  
GATGACCGCGCCGGAGGGTGCGTTCACATGCGCGCAATGGTCAGTCGATAATGTGGCGGG  
AATATCGTGATTTTAAATGATATACTTCACCGTGCTATGTAATTGTCAACTTTTGACAGATTT  
TCCGGCGG

285. >MSTRG.5855.2 Gene=MSTRG.5855

CTTTCTTTTAGATTTGTTGTCGTCATCATTATGAGCGCTCCTTCCTGTGTTTATTTGTTTATTTA  
TTTTGTTAATAATAACATGTATGACAAACGAAAACAACGTGTATGAGATACTTCCGAAGAC  
AACATTACGCCCTTCCCATATATGGCACATTGGCATGTTGTTTCCCTTTCGAATTGTCTTGT  
AGATAATTCTGATACGAGCAGTATGAATCGACTCATAACATTTCTATCTACTAGATGTTATA  
TGAAAATTGCTTTATACATATATCATAATAATCGTTATATTTTCGTATAACGAGTCGCGAGTT  
ATTATAAAGAGACGTGACACATAATGATATCGTATCGCAATACCTATTCGTCTATGGACAG  
ATTTTATTCATATATCACTAAGACATAGATTTTTTTTTTTTTTTTTTAAATATATTTTCGGA  
ATCTTCGGAAGAACCTCGAACCTGAAAGATATCTTACACTAACAAAATACTATGAGATTCT  
TGAAGAACATACGCGAGAACGGACAATTAAGATCAATTTCAAATAAAATCTCTTGTAGA  
CCGAGGTGATTAAATTATTCTTTGATCTCGAAATATTTATATGTAGGATTTTCATATCCATTG  
ATTTGCATGTTTGCAACATGCCGCTCCTCTGGTGTGGCCGCTTGATCAACTTCAATAAAATCC  
CTGACTATGAGGGCTTCTTGCACTGCGCCTTTGAATACTGCTACACCTACTACTGCTGCAG  
CCATAAGTGCAATTCCAGCAAATGCAAGTGTAAGTAGACAGATCGACTTTCTCTGTGATA  
CATCTCCCTTCTTACAGAGTAACCCGGTTCAGAATGGGAAATGTCATGTGTCAAACATATGA  
GCTGCCCTAACAAAGTCCTTCGCTGTGCATAGCTGCCGGTGTCTCCGGTTGTTGTTGAATATCT  
TTGTTATCATTTATCGAATCGCTTTCTTCTTGTGTGCTTGTCTGTACGTAATTCACCACGTT  
CAGCTTTGCGTTGCTCCTTGCGTACTCGTTCAGTTGTTTTTGATGCTCTTTTCTTGTGCTTA  
CTGGTAACATCGGCCTGATATTTATCTAAAATGGCTGCTTCCGCTTCTCGTGTATCGCTAAC  
AGCAGTCCAGGAGTCTCATCTTTGCTCCTGAGGGCCAAAACGTAATCATCCATAAGGCGGC  
CAATTTTTGCGCTTAAATCAGGATACCGTTCTAACATCAACAGGCTCTGATTGGTGATTCTA  
TCGATTTCCGCCAAGTGCTCCAACGTTGCTGGTTTCTCACGTTGAGCTTGTTCCAAACTGCTG  
TCCAGCAGATGTTTGTAATGAGCAATAGTATGATGCCTATCTTTGTGAAGAGCACGAAGCA  
ACTTTTGGAGACATTTTGAATGCGATGCATATTTGGTGGTGTCTCGTTCAAAGCAGCTGTAT  
AACATGACATCGCTTCTTCGTTCCCTTGTTTAACAGCTTCTTGTACTCTTTGCTGATGCATAG  
CGCTTAATTGATGTTTCTCCGCGGCACCGCTCTCTTCTAGAGCAGCAACAGTTTCCTGGAAT  
CGCGCGGTATCCATCGTTTGAAAGCATCAGCAGCAACTGGGTGCTGGGCACGGATATCTT  
GATACTTTTCTCGAGATCACTCCAGTCCTTCATCACTTTTGTACTTTCTCCTTGTGCACCTC  
TTCGAGTCTCATTTGTGCTTGTGTAGCTCTGGTGCTCAGAACGAGGATCGAAATGAGTTA  
GATATGGATCCGGTGTGCTCTGTGACTGCGAAGATTGTTGTGTGCTGGTACTAACTGGCAAT

GGCATTGCAGTTACGTCTTGTTTCGGTTTTTCCGTGGTTGAAACTGTTGTTGATAATCGACTT  
GTTGTAGTGTCTGAATTGTAATCATCGTTGAGATATTCCTCGTCACTTTTCATCATCATCAGGT  
TGATCATTGAGTCCGTCTTCGGGATCAGCTTCAGAATCATCTTCATCATCTGCATCAGTATCC  
AAACCATCATCGTCTTCAAGGTCGTCTTCATCTTCGTCGAGATCTTCGTCCACACCCTTTGGA  
ATCGGCAAGTCGATCGGTTTTTTGGCTTTCAAATTTTCTTTGAGGTGTTTCGGACAGCACACG  
AATTCGACGCCAGAGAACAAGGATATTCCGCAGGGCAACAGCATTGCAAAGCTCCTCAGA  
TTCATATTCTCTCTCTGCAGGTGTCTGCTGCGGTCGCATTCCACCTGTGAGATTCCCAGCAT  
TTCGTCTGATTGTGAAGGTGGTCGAACAGGCAGCCTTCCGGAACGAGCAAAGCGTCGCTTT  
GGAACGGCCCCCTCGAGACATCTGTACGGCTTGACCCAACGTGACAATTTGCATTTGGTTCTT  
CCTGGCTTGCACCATCCGCTCACCTTACATAGTGCGACGACTCTACGATGTTGGTGATGTC  
TCTTTTCGGGTAAAGCCTTCTTGCAATATTCGAGAATCTCCAGCTTGTCCGTCATGCAACTCTT  
CTTGTCGGTCGAGGAGACCCAGCGTCCCTGTTCTCCCATGTGCTGTGCCAGATACACCTCTC  
CAGCCTCGCACAATGTGGCAACTTGCGGCTCTGATCTTCCTCCAGCTGGTGCCAACTCGAGC  
CTCTCCGACACCGCTTGAACCCGGCAGACCATCAAGACGCCAGCAGTGCGGGCACCAGC  
ATCCCCTTCATCTTTCTTCCTTGATTGACTGTTCTGTAATAACTCCCGCACGATGTGTGTTTGG  
ATTCCTCTCGTAATGATTCTGGCTTAGCTCGATCTTCGCCGTATACGAGAGCACAGCGTA  
CTACTGTGACACTGCTGCTGGGTGGGTGCTTTACGAGAAATCAAGATGGAGGTGAAACGC  
GGCGCCGGTGCCGCTTCATCTCTTTCTTTTTTTCAGGAAAGCATGAAAACGCACGAGCAGAT  
AGCCTTGGCCCATACCTTTGCCCCTGTGTGCGCCACCGTACCCACTGGTTACCCTGGAAACG  
GTATCGATTTCAACCCTCAGCTATGCAGTAGAAACCAGCGGCACACCATGGGGGTCTCTTC  
ATCCCGAGTTTCGACAAGACAGCCGTTTAAACTACCCGATTACACCAACCTTCATCTCTAT  
TACCGTCTTACATTTGTTTTGCGTACTTCACAAATTCAGTTCTTCAAACGATATTTGAGGT  
AGGGGACACTGTGAAATTAACGGCGAAATTTGGAATATTACGAACTATTTTTTTGATTCAA  
TGATTTCCGCTTTTGTAGGCGGCTAATTCGGCGTATTTATTTATGTTAATATAAAATCTTCTTT  
ATTATATGAAAAATATATGTTTATAGAAGAATATTACATTCAGTTGAAAAATAAATGCATT  
ACATTGGCTGACACAGAGATCTAAATGTCCCAACAATAAATACAACATATTCTATAT

286. >MSTRG.5855.4 Gene=MSTRG.5855

AAATAAATCTGGCAGCATATAGTATATATCCATATACGATCGAAAGAAAACATTGTTCGATC  
GAAACGACAATTTATAGATGTACTTGTCTATCATAGTCACCATTACACACCGGTAATAACA  
GTATGAATAAAGAAAGAATAATATTCGCGCTATGACATCATTACATTCGCTCTAATACT  
TAACCATGCTGTAATACGTAATCAAGACGAGACAGAGAAAAAGACAGAGGAGACAGAGG  
AAAGAAGACGAAATCAAACGGAAAGCATGAAAACGCACGAGCAGATAGCCTTGGCCCAT  
ACCTTTGCCCCGTGTGTGCGCCACCGTACCCACTGGTTACCCTGGAAACGGTATCGATTTCAA  
CCCTCAGCTATGCAGTAGAAACCAGCGGCACACCATGGGGGTCTCTTCATCCCGAGTTTCG  
ACAAGACAGCCCGTTTAAACTACCCGATTACACCAACCTTCATCTCTATTACCGTCTTACAT  
TTCGTTTCGCGTACTTCACAAATTCAGTTCTTCAAACGATATTTGAGGTAGGGGACACTGT  
GAAATTAACGGCGAAATTTGGAATATTACGAACTATTTTTTTGATTCAATGATTTCCGCTTT  
TGTAGGCGGCTAATTCGGCGTATTTATTTATGTTAATATAAAATCTTCTTTATTATATGAAAA  
ATATATGTTTATAGAAGAATATTACATTCAGTTGAAAAATAAATGCATTACATTGGCTGACA  
CAGAGATCTAAATGTCCCAACAATAAATACAACATATTCTATATGTATATATAGC

287. >MSTRG.5872.1 Gene=MSTRG.5872

TAATAAGGGAATTAGATATTAATTATTCATGACTTTTTATCATATGATAATAATAACACGTG  
CAATAGATGATTTCGTAATCGATATCACGATATCTTTCTCTCTGATATCTTTAGACACACTTGC  
GTACGAAAAGCAGATTAAACACTGCATTTAACAGTGTAAGATATAAATTACATCGAATCA  
AGATTGACACGTTTCGTATTATTAGATTGTAGTTTAAATATAAATACATAAGCTTACCTGTGA  
CAGAACACTCCTCGATAATATTTTCGATGATTATTATGGCGATGAAATGATGCGTAATCTATT  
CTTATGGTGGCAACAAAATTATTCCTGAAATACACTTACAAACAATCCTTAAACAATTGA  
ACATGAATAAATAGAAAAAGACGAATACCAAATTTTCAATAATCATCTTAAAAAATATGA  
ATAAAAAAAAAAAGAGAGAGGACCAAGCAATACATAACATGGAAGAACCAAGTGTTTA  
CCACAGTACAGTACAGGAGAAGATGATAACGAGTTCGAAGACTCGATAATCCATGGAAAG  
GGGAGGGGGGAAAGACGCTGTATGATGACGACCCCTGAGGGTTCGAGCATCTCGCCATTCTT  
CGTTTGTTCAGTCGAACTTAATTATCATTGACAGAAGGGGCACGAGAGCTTCGGTGTGCTTGC  
TTCCGTGGAAATCGCGCGGAATATTGAGGACGAGGAGGAAGGAAGGAAGTATGAGCTCGAG  
AAAACCGAGAAGGGACTCGGACGTCCTGTTGTCCAAGTTCGGTCACAAGGAGTTGCTGTTC  
AAGTTCCTCGTAATCGGTGATTATGGAGTCGAAAAACAGCATTGGTTAGGAGATACACAG  
AAGGAAAGTTTACGTCGAATTACAAGATTACCATAGGAGCCGATTCGCAATAAAAACGCT  
CGACTGGGACCCTCTTACTAAAATAAATTTACAATTGT

288. >MSTRG.5885.1 Gene=MSTRG.5885

GCGAAATGAATGGAACCAATCCACCAATGAACAACATTCATAACATTCATCATAACATTTA  
TCCCAAGTTGCTAGGCTCGGCTGGATGGTCCTCGATAATAATAAACAGGCGAAGAGGATAG  
CTCCTCGGCGTAGGTGGAGGTTGAAGTTTTCTCTCCTTCGCTTGGTGGTGGAAAACGGCGGT  
GGTGGATGGAACGGTTGATATACCCGGCGAAATGAATGGAACCAATCCACCAATGAACA  
ACATTCATAACATTCATCATAATATTTATCCCAAGTTGCTAGGCTCGGCTGGAT

289. >MSTRG.5886.1 Gene=MSTRG.5886

CTCCGCTTGAAGGTGGCAGCACGGTCTTCGTTTCCTGTTTCGTTCTGACGTGCCGGACCCCG  
CGATCTAATTAAGTGCGACGAAGTAAACGTCAATGTGCTGTGAAAATACTTTAAACTGTGT  
CATATTGAAGACAACTCCAAGTTTAACTCGCTAAAGTGGAAAACCTAGTGTTCCAAGTGG  
CTGACACGACATTTAAGCCGAAGTTGAAAGCGTCGTCAACGAGCCACGACGAAACCGAGA  
GTTATACACGTCGACATTAACGGTACGAAAAGTATAAACAATTCCTACTACGCGTCTCCTT  
GAATAATCTCCGAATATATCAGTCTTAATTCGACTTCGAACACGATAACATCGGGCGCCGA  
ACCAAAAACAAGAGAACTGCGACGTTCTCGAGACGGAGACCAACCACGGCGATCCTGTTG  
GCCGCCGTAGGAGATGAAAATGCGATCTGTCCGTGGAGGGGAGGGTGTATGGCCGGCGCA  
TCGACGCGTATCGACGGGTCCGAAAAACCGCGGCAATCTATCCGGGGATTGCTCGTGGAAT  
CGGCTCGAGAAGGCGGCCCTCTCTGATTTCCTGGTGTTCCTGCGCGGCGATGTGCCGCTTTG  
GCCGCTGCCAAGGAACGAAAGATAAACAGGCATAGCAGAAGTAAGTTTAGGTGAGAAGC  
GTGGTCTGCTGTGTTGGGCTCGTACGAGGGGGAGGGGGAGGGGGGGTCAATTAAACGAGAA  
TGGAGGAGAAGAAAGAAAGAAGAGGATAATGAACGAGAGATCGAGTCGAGCTACTTATA  
GTCCACGCCCTTTCGTGCGGAAACGCGAGCCCGAATTTTAAAGATAGTCTTCCATGGTTAAA  
CAAGTCCTTTGTGTCTTTAAATGCAAACAGGAGTTTAAATCCAACTCCTGGGAAGAAGCA  
TGGATTCCAGAGAATAAGCAAATTCGCAGGAAATAGAGGTGAAAGGAAGGAAGAATTA  
GAATTTCTATAAATCATTGCCTCTTATTAATCCATTTTTTAATTAACAGTCAAGAAGAAGGA  
GTTAAAAGAGGGGACGTTTAAAATTTTCGTAAAATGGAGTTTCGTGAAATTAACACCGTTTC

TATTTGCAATAAAAATACGAAGAGGGATAACGACATAGAATAAAAATGGAGAGAAAGAGA  
GAGAGAAAAGAAATAGGCGAGTCGTTAATAATAAAGGATGGACATTTTTATTGGTGGACCT  
TTATATTTCAACGATCGTCGACGTAATAACGCCCTCTTGCGACGTCTTGCAACGTAAAAAAT  
ATTGACGTCAATGGCGTACAATTGGCGTACCTATCATCCCTTGATATCTGTTTCGCAGACGTA  
CCGGAAGGAGGCTAATTAAAGTAGGGGTAGGTATCCCCCCTCTCTGAAATCGTTTCTCT  
AATCTTCGGATTCTTCCAGTTCAGACCAAGTTCGAACGCCTAAGCTAGCACATCCTATTCCA  
TCTGGTAAGTACACTTTCTTTATTGATCTCTAC

290. >MSTRG.5886.2 Gene=MSTRG.5886

CTCCGCTTGAAGGTGGCAGCACGGTCTTCGTTTCCTGTTTCGTTCTGACGTGCCGGACCCCG  
CGATCTAATTAAGTGCGACGAAGTAAACGTCAATGTGCTGTGAAAATACTTTAAACTGTGT  
CATATTGAAGACAAACTCCAAGTTTAACTCGCTAAAGTGGAATACTAGTGGTTCCAAGTGG  
CTGACACGACATTTAAGCCGAAGTTGAAAGCGTCGTCAACGAGCCACGACGAAACCGGTG  
AGAAGCGTGGTCGTCTGTTGGGCTCGTACGAGGGGGAGGGGGAGGGGGGGTGAATTTAAA  
CGAGAATGGAGGAGAAGAAAGAAAGAGAGGATAATGAACGAGAGATCGAGTCGAGCT  
ACTTATAGTCCACGCCCTTTCTGTCGGAAACGCGAGCCCGAATTTTTAAGATAGTCTTCCAT  
GGTTAAACAAGTCCTTTGTGTCTTTAAATGCAAACAGGAGTTTAAATCCAACTCCTGGGA  
AGAAGCATGGATTCCAGAGAATAAGCAAATTCGCAGGAAATAGAGTCAAGAAGAAGGAG  
TTAAAAGAGGGGACGTTTAAAATTTCTGTAATAATGGAGTTTCGTGAAATTAACACCGTTTCT  
ATTTGCAATAAAAATACGAAGAGGGATAACGACATAGAATAAAAATGGAGAGAAAGAGAG  
AGAGAAAAGAAATAGGCGAGTCGTTAATAATAAAGGATGGACATTTTTATTGGTGGACCTT  
TATATTTCAACGATCGTCGACGTAATAACGCCCTCTTGCGACGTCTTGCAACGTAAAAAAT  
ATTGACGTCAATGGCGTACAATTGGCGTACCTATCATCCCTTGATATCTGTTTCGCAGACGTA  
CCGGAAGGAGGCTAATTAAAGTAGGGGTAGGTATCCCCCCTCTCTGAAATCGTTTCTCT  
AATCTTCGGATTCTTCCAGTTCAGACCAAGTTCGAACGCCTAAGCTAGCACATCCTATTCCA  
TCTGGTAAGTACACTTTCTTTATTGATCTCTAC

291. >MSTRG.5886.3 Gene=MSTRG.5886

CTCCGCTTGAAGGTGGCAGCACGGTCTTCGTTTCCTGTTTCGTTCTGACGTGCCGGACCCCG  
CGATCTAATTAAGTGCGACGAAGTAAACGTCAATGTGCTGTGAAAATACTTTAAACTGTGT  
CATATTGAAGACAAACTCCAAGTTTAACTCGCTAAAGTGGAATACTAGTGGTTCCAAGTGG  
CTGACACGACATTTAAGCCGAAGTTGAAAGCGTCGTCAACGAGCCACGACGAAACCGAGA  
GTTATACACGTCGACATTAACGGTACGAAAAGTATAAACAATTCCTACTACGCGTCTCCTT  
GAATAATCTCCGAATATATCAGTCTTAATTCGACTTCGAACACGATAACATCGGGCGCCGA  
ACCAAAAACAAGAGAAACTGCGACGTTCTCGAGACGGAGACCAACCACGGCGATCCTGTTG  
GCCGCCGTAGGAGATGAAAATGCGATCTGTCCGTGGAGGGGAGGGTGTATGGCCGGCGCA  
TCGACGCGTATCGACGGGTCCGAAAAACCGCGGCAATCTATCCGGGGATTGCTCGTGGAAT  
CGGCTCGAGAAGGCGGCCCTCTCTGATTTCCTGGTGTTCCTGCGCGGCGATGTGCCGCTTTG  
GCCGCTGCCAAGGAACGAAAGATAAACAGGCATAGCAGAAAGGGCGTTAACCATCGAGC  
GGCTAATTGCAGTGAACAAGTGTGTGCACACGAGTGGCCCCTAAATGCAGGAAATAATGC  
ATTTCTGAGCCAGTCAATCGGTCATCTTATTACGAACCGAG  
ACGATGAGCGGGTATATGACGAAGGTGGTCGGATCATCGGGACCAGACAATTTAATTGTTT  
GAACTTAAATGGGGAGCAGCTGCCTCCTGGTGGCCTAACAAGCTGGTAATAACCTGCCTCC

TAACCTATCCCCTTCTTCGTCCGATCCACTCCACCACCGTTCGTGGATCCTCGTTTGGAGGG  
 GTACGGTTAAAGGAGAGGAGCATTAAACGTTGAAGGTTATTTATTTGAAAGCGAATTCATC  
 GAACGAATATTATTTTTCGAACGGGTCTTTCTCTTCTCTCCTTTTTTCGGACGGGTAATTTTTTC  
 GATCATTGAAATTAGAAATTATTATAGGGGGAGGGATTTTGATTTTTAAATTTTGACGATGG  
 ATGGAATAATTGGTGTATGAATTGTGAAAAATTTGTATATTTATCGTGATTGATATTCGATA  
 AGGGAAAGGAAGGAAAAACGTGAAATGTGTTTAACGATCTTGAAAAGTTTGGTACAAATA  
 TAAAGGAAGGATTATAGAGGAAAGTGGTTGTAATGATCGAGTAATAATAACGTGTGAG  
 AGAGCGGGGAAGGAGGAATGGAAGAAAGAAAGGTAAATATTAAACGGGGAAACGTGAA  
 GCCCACGAGGTCAGTACGTGCGAGGAG

292. >MSTRG.5911.5 Gene=MSTRG.5911

TACCATTTCCGTTTTGGGCGTAACATCATCTTCTACGTAGTTAGGTAAGAATAGTTTTACTTT  
 AGTTAAAAATAAATTTTCGGAGTTATTTAACAAAATTTAATAAAAAAATTAACATTTAAATA  
 ATAGAAATAATGTTTAAATAATATTTGATTACAGATGGCAGATCAACAAGAAGATATCCAC  
 GGATTTTGGACAATCTTGTAGCATTTGCCGATGCATAGCCTATTTTCGACAGAGCATAGGGC  
 CACATCGTTTTTGTGTATAGGAAATGTTAAATTTCTTATACACAGCTGTGATCATATATTTTC  
 CATAAAAAGGATTTAATTAATAATCAAATATTTACGTCATGATCCTATGATTGTACTCCAAT  
 ATGCGTTAAATCATCAAAAATATCATCAAAATGGTAAGTCATATTATTTTTTAAAATTCACT  
 TATACTCTTTCTTCGTAAATTTTTTGAGAGAGGGCGCCATATACGAGAAATTACGACAAATA  
 TAATGGAAGGGGAAAGCCTTAGGATCAATAACCTTCGTTTCATATGACCTCATATCCTATTTTC  
 TGGCGTCATCAACTTTTAATGATCGTATAATATGAGCGTTTATGTAGTTTTATGAAAGTTTTT  
 ATAAACTAATGTAATATATATTTGAATACTGATATTAACAAAATGGGGAAGGTAAATGA  
 TCTTTGCGCTTTTCTTTTATATGCGATGTTATGTGAT

293. >MSTRG.5913.1 Gene=MSTRG.5913

AATCTTATATATTATAAATAATATGATACAAAATTCAATTCTTTAAATATGAGTATAACCTA  
 TCAAACATAAAATTTGTTTATGGAAAGTGACTAATTTTTGGCCAACTAGCACAAATCATTAT  
 TTCATAAACTAAAAGTCTAAATTCATAATCAGTAAATTATTTAAAGCCAAAAGACATCATG  
 GAAGAAAAAATCTAACTGATGAACAAAAGAAGTTTTTGAAGAATGTGAAAATGAATTC  
 AAAGATCGATATACAGAAAAAGATATTGAATTTATGAAAGTTAAAAATATGGAATTAATA  
 AAACCTCCAATCATTGATCCTTGGTATCCTAGAAGAAAAAGATATTTTTTTCCTCAAGAAAG  
 AGGTGAAATATATAGGAATTCTGATAGATATTATTCTCAACGTTATAGACCTT

294. >MSTRG.5929.1 Gene=MSTRG.5929

ATTGAGTACCTCTATACGGAAGTGACAGGAATTGCGATTGGTAGGGTAGCGTTATTTTATTA  
 CGTGTCATATACGCAAATCTTTTCTCTATTGCTTGAGAATTCCAAAAACGAGTTTTTGGGAA  
 GTTTTTTAATATTTGATTATCTTAATTATATACATATTAAAGCAGAAAGATGCGTCAATTGA  
 AAGGAAAAACAAAAGAAACAAATAAACAGAAAGAGAGAAAAAAGGAATTTCTGGA  
 AAATAAACACGTTGTTTTACGGTTGTGTTACCAACAATTGCTGCAATATTTGTTATAATAG  
 CAGCATACGTTTATGTTAAAACCCGTCCGAAAGTTGTTGAGTATTAATTGGCGTGTGTTTCAT  
 TATTAATCATTAATAACAATACCAATGTATTTCAAGAATGCTTGGACAGTTCCTTGATACA  
 TTTGTACAATTAATAAGAATTATTTAAATAAGAAAGCAGATTTGAATGCTGCTCATATGAT  
 ACTTCATTCTAACATTTAATAATCAAATATGAACATTGTGC

295. >MSTRG.6000.1 Gene=MSTRG.6000

GTATAGTTCGAGACACATTTAAGACGAAGCAAAATCACTCGTCTTATTCTTAACGCAAGAA  
TATGCGGCACAACAACGGCTGAAAGCATACTGGCAAGAAGAGAGCAAATTGTAATTGTTA  
ATAATTAATATCTTTTTTCCAATTTTTTTCGATCTCCTTAAGAAATTTATAGTATGCTCACTAA  
GTAGGGCATAAAACTTTCAATATATAATCTGTTAACAAAGTAGGTACTGTTGGACTGTCTTC  
ACTAATTGCTTTTAATATTTTTATAAGAAGTTGTAATGCTTGATTGTCTGGTGGGCCACTGTC  
TGTATGGTAAGGAATTACGGTAGTTAAATACTTAGATTCTTGAAGTGATCTATGTTGTAATA  
AAGGACTAGTACCATTTTGCATTTGATTTCTTTTTTTTGTAAACATGATGCTGTCTCCGTCGATT  
TTGTACTGCTAACAACAATGAAATAAATTGATTTTTTAATTCTTTTTCATATTCAAGTTCATC  
ACGCAATGCAAGTTCCGCAATGAGAGTTTCACTAAGCGCTCCCACCAAGGATTCCATTTCT  
CCAAGTAGCTCGTTAAGCTGGCTGGAGGTAAGATGTTTTAACTTTTTTTCATGCAGCGGAGA  
GCCCAAACTTCTCTGCTTCTCTCCAACGCTTCGTCGCTATCTAATAAAGATCCATCAGAAT  
CTGGAGATCTTCCATGGATGGACTTTCCTGCATTATATCATCTATTTACGGAGTACTTCTT  
CGGCAGTTTTCAACGGTTCCTCTGGACTATGAGTATCGGTGCTACTGGACAAGATCAAAGC  
ATGCATGTCCAAATCAGTTGCAACAGCCTCATCTTCGCTACTTAAATCCTCTAGTTCAGGTC  
TTTCTGCGAAACCGGAGCTTCGTTCAAATTAAGCGCAGGCATATGCATTTTCCTAGCATAAC  
GATTTACTCCAATCGATTGGTAATATGTTACCAAACGTACCGGTAATCGTCCACCACATTTG  
ACATTCGTTTATAATTTCTTCTTTCGTTTCGTACTTGCACGGGTGCTAGGGATTCAACGTTTCGT  
GCCGTAATCGCGGAAGCAGGATGTTATCTTCTCATCGAAGGTGTTAACGAGGTCCTCGAGA  
CTGCCGCTGAAAGGGCTGAATGTCCCTCTTGCAAAATATCAGTGCCATTTTACGCGTAGT  
CGCTGGCTCATTTGCGTTACAATTTTCTCCATAAGTCGTGTTTAACTTGTATCCAGCAATTG  
TTCTGTCAGTAAATTCATATTCTTCAAGCTGGCCGTGTCTTCTCCTCGAATCGTGCGAGGGG  
TGCTTCGAACCTTCAACTCGGCGATCTTGCCCGCCATGTCCCTCATTATTGACCGTGTAGAGA  
AGAACCGGCAGCGAAGTTTATCACCGTGATGAAATTGGGCACCGTACACTTGCGGCAGCG  
CCCCGAGGCGCACCGTTTTTGTGTTTGTCTTTATGATTCTTTTACAAGACAATAGAAAAGA  
AAAAGACGATCGACATTAATAACCAATTGCCCCGACTATGCAATATCCGCTGCCTGCGAGGCT  
TCGCGAACGAC

296. >MSTRG.6051.1 Gene=MSTRG.6051

TGAATGTTGAGCCTAGTGTATGTTTGAGTTCGCAGAAATATTTTATTATGTAAATATACCAA  
TTATATATATATATATATATATATATATATATATATATATATATATATATATATATATACA  
TATATATAATGTAAATTATATTAGCACGAAACATTTTAGCATGTCTTATTCATTGCTCAGTTG  
TTAAATTTTAATGATACAATCAAATTATATTAAATTGAAAATATTCGTACGTGATACATTTG  
TATTTTATTTTGTTAATATATTGATATAAAATTAATATTATGAGAAATGAAGAGAAAGAAAA  
AGTATTATTTTAAATTTATATATAACATTTTACGCAGAGCGTAAATGTTTCTGTGGTTATGAC  
TGTGGAGATTTAAATTAACTTTTACGGGTTGGTATTGTATATTACGGCAATTTTTTTTATTC  
ATTTATTTATGCCGTAGTAAAGAACAGCCAATTGATTTAATTCCTTATCGTTGCTCTATTTTT  
ATAAAGAATTAAATGATTGGTAGGATCGTAGAATTATACGAAGAAATAGATTGTAACATTA  
GACTCACTCCGTAACAAATTATGAAAATGTAAATTTATATAAATTTAAAAAGAAAAAGTT  
TACGAAATTGAGTTATAATGTTACTCTTTGAAAAGTTTTGAAACATTCTCCCTTTTAAAGAGT  
CAACTTGCTAATGCTAGTGAATATAAAAAGATATATATTTTATTATTATTTTATTTTATCCAA



CGCGCACGTGTGCATGCGTTGGTTATAGTCTGCGAAGGCACAGTATTTATATGTATAATTCA  
CTTCAAAAATAGAATTTATGAATGGAATATTTATTGTAC

297. >MSTRG.6062.1 Gene=MSTRG.6062

GGAAATATTCGCGAATCGATAATTCGCGAACAACTGCAGCAACAACAACGGGTTAGTCAC  
GCGAACGACTAGCCTATTCGATTATTATTTCGAGCAAATCGCACAAGGATAAATTATAATAG  
TCATCATGATGGAAAATTTGTTTTCATAAAAAACAGAAAGAATATAAAAAGAAATAAAAT  
ATTCCGCAAAAAATTGTTTTATCAAAATT  
TCATTATCTATGATAAAATTTTTATTTTTTTTTTTTT

298. >MSTRG.6104.1 Gene=MSTRG.6104

CAGTCTACGGCCCCGGGACAGAGGGACCAGGACCAGCCTCGGGAAGGAGAGCTCGTCGTGG  
ACCCTCTTCTCCTCTCGTACACTCGTATCGTGATCTATGTATTGTATCATCGTTCAGTGTGCT  
AGTGTTAACCTTGAATGTAGCGCAAAGGTTACGATTCAGTGTGATAATGAAATAGGATAAC  
AAACTCGACAAGTCATCATCGATCTTTTGATGAGATTATATCGCTAGTGATTGGTAGTTGTC  
TTCGATAGATAAATATTATTATCGTGATAGATACGTATCGAACGTTGTCATTGGTGGATTAT  
ATCGAAGAAACCACCAATTATTGGTGGAGAAGTTTGGAAGAAGATTGAGAAGACGCGAA  
CGATGAGCGGAGTGGTTCGGCCGGGAAGTCTCGGAGCACGTGCCTCGCACGCAGAAGGC  
GCTCCGAGCGGCACCAGGTGCGCTAATCGAGGACCGATTTGTGGGAACGAAATTGTGACG  
GTGGTATCGATAAATAGAACGTTTCAAGGCACGTACACGCGTTCACGCGTTCGTTCTTTTTA  
ACGAATTTCCGGCGCATCGGTACGTGATCTACGATTACTCGACGAGGGAAGGAAACCGGC  
AAGCAGGAATGCCAGCAGCAGCTCGTGCCGTGAACACTTCGAGGACGATCTCGATGATCG  
CTTCGTTGACCACTCTTTTTTTTACGTTTCATCGGAATCGACGGCATGGGACATGTCAGTGGA  
CACAACGTTGAACGGAATACTTTTCATCAAGAACTTCGAAAATACTTTATAGGATATTTAA  
ACGTCCGACTCGAATAACACCTGAAACTCCATGACGATTGATTTAATCGAAAACCTTGCCGA  
CGAAGCCATTGAATTCTCAATACCGGCCGTACCACCGGTACCATTACTAATGAATCATTTCC  
AACTTTGGACACAACGGCAGCTCGAACATGGACGAGCGTTCAGTTACCACTGCCGATCGT  
ACAGTTTCACAGGCATGGAGAAAGAAAGAAAGAACAGATAGATGGACAGAGAGAGT  
GAGAGAGAGAGGATGGAAGGGAAAAAATATGATCGATCGTGAAACGGAGGTCCACATTG  
TGCTTGGAACGACGAAAATAAATTTGGCAAACGATCCATTTCCCTCGAGGTAGCTGGAAT  
TCATATCGACGCGGTTTCGCGTTTTCTTAGCTACGAACTCTACGATTTTTTTTTCCTTTCGTTC  
TTTGCTAATTTACCAGCCACACATTGAAGTGATATATCACACGATTGTAATATAAAAAGTTTG  
ATTTATCCCGACATTGGTTGTAATTTGAGTTAATAATAG

299. >MSTRG.6147.1 Gene=MSTRG.6147

ATCGTCGATATCAGTTTGGCGCGATGCTCGATTTTCGAGGAACTCTTACAAAAGGAGGAAC  
GTATATTTTTACGATTTAATATATATATACGTACCTGTTTGTCTCATATCAAATGTTTCGATC  
AAATGTTTCCGTCTCGTCGAGTATTATACTCTGTTTGCCGTAGATTAAAGGAAGCGATTTTCC  
TTAGAAATCGATTTTTTTTTTTTTTTTTTTTTTACGTTTCCGCGACAACGATTTCAATGATCAA  
AGAGACGGCATAAAACGAGCAAAAGAATTTAATAAAAAATTCGTATTTTATTTACAAATATA  
TATGCATAACGCTGTACAATCGTGCAAATATTTTTATCCCAGTCTGGGATTTAATTGGGGAA  
AAAAAAAAAAAAAAAAATAAAAAAATAAAAAAACATTATCAAAAATATTTGTTCGATATTTTACT  
TTCGAATCATGGTCGGCTGTCTTTATTATATATTTTCATTTCAAGTTTACCAAAGATTTATCCCT

GCGCGAATTCGATAAATACCATCGTCAAATACGGAAATTTTTTCGCTCCGTCTCTTAATTTAC  
 ATAACAAAGAATAACACGTAAAATTGTTATCTAAAAAACGTTATAAACGATCGGTTAAAA  
 AACGATCGTATCTCGGTTTACAGATTTCCGTTCAATTCCTTCTTCTTCTCGCCGTCGGCAGTTT  
 CTCGTGGCGTCTCGTCCCTCTTTAATAAAATTCGCGACGCCTGTCGCACTCTTGGGCGCCGTAA  
 AGATCCAAATTCTTCCCGAGATAACAAACCGCTGCATCGAACAACACTCCTATTATCGAGA  
 ATCCTGCAGAGGTTATGTTGACTAAATATCGAAAGTTTCTTCCATGATGGAACCAGCAATTT  
 CCCCTAGTCCCGCAGGATTCTTCCCAGATCAAGCAAGTCGAGTCAATAATGGCGCCATAAA  
 TGATCGGACCCGGTATCAAAGCGAACAACGAGATAATCATCAAAGTAATACCCTGAGCGA  
 AGCTCTTGTCTTCTTTTCGACGCTACGATAATTAACCAAAACGTTGCCAATCTTTCCAGAA  
 CACGCTAACGTTTGTATGATACAGGTGAGAACCATGAACAGAAGGTAAGGGCGACTGCAA  
 TCGTTGGTACAAGGGCCAGCTCTGACTTTGTGCGAAGATCATCGAGTGTGGATCGCTAATGA  
 AGATCGATTGATCCCTCGAGTCGCCATCTGTCGTGTAACCGAAGTGATTTTCTAAATTGAAC  
 GTGGATAAAGGAAGGCAACTACAGTTGCCGAACCTCTTTGTGCTTGATTATCGTTTCGACAAC  
 CAGCATGGCAGGCGGAATAAAACGTTATCTTGGACGCCACGTGACAAACAGGAGAATATT  
 TAACACCGTCGCAATTGCAATCTATATTGCAATTTGATGTCAAATTCATTTGCATAGTTTCTA  
 AATTGAGACCTTCGAACCCGATATCGGAACAACCGAGAAATATAAAGAGTATCTGACCGG  
 CAACGAAACAAATGCCGACGAATACATTCCATGCTAACAATGGTCTTGGACCAGGTTTAAA  
 TTTGCTAATTATTAATCCGGAGAGTAAAAATCCTAGTACCATACCCACGAGTGATATAGGA  
 CCTGCGATTACAGTGCCACCAGCTGCAGAGGTACTGTATTGAACCTCGAGATATTTTGCCA  
 AAAATGTTATGTATGCCGATGCACCTAACACGTAAAACACTCCGCTCAGATTATTGAAAGT  
 CAACAGCCAATTCGTCAGTAACCTCTTCATCGCGTTTGGAAATTCACGCATAGTTGGAATAT  
 ACTCTGTTTCCAAAGACTTTCTCGGTTCCATCGGTTTCATGTATTGTTCTGACGGTCAAAT  
 GCAGTTTCAAGGGGATACTACCGTCCTTTTTTCACAGTTTCGAGTGCAGTGTCTTTTTCTGTCTG  
 GTAACTTTCGCGGAAACATGGCTATTAGTGTAGCAAACATGCCCATAGTGACACCTAGAAT  
 AATCCAACCGAGCCACCACGCACCTAACCATCGTGGATCCTTCTTTGTGATCACAGGATGT  
 AAAGTGGGATCTATGTACAACTGAGACAACCGTAACCTAGTAAAAATCCTATTGCTGGTC  
 CGACTGTTCTCAGAGCAAAGGTAAAACCTAAAAGCATAGGAGTATTCTTCTTCTTTGTATTG  
 TCATCCAGGTACGTTTGACCAAGACCGTAATACAAAGTGGTACCAATTCCAAGGATAAATT  
 GGGAGAGGAAGACCAAGAGTCGAGGTAGAATGCTGACATCCAACAGTGTCTCTCTCGTCGC  
 AATGATCCGTTTTACGACTCGTGGACAAATGGCCAAATCTTGAGGAACTGTGGTGGCGTT  
 CAGCAAAGTTTGATCGAGATATTCCTTGGTCAGCGCCAAAGCGTCTCGTCCCGGTCCGTATA  
 GAAAGTGTGGAAGAGCAAGGACGAGGCACGAGAGGGCGCTGAGACCGACACCGATCGCG  
 ATCCATCTTGGACGGTGACCAGACCCTCCATAATAGGTTAATATCAAAGACAAGATTTGCG  
 AGATTTCTGTTCCCGGAGAGGATCAATCCAGTTGTACGACTAGGTATTTTGAATCTTTTTTCCA  
 AAGTCGTGAGGGTGACAACGATGTAAATAAAGGCCATTGCCTGCACGGTGCCGAGGAGGC  
 CGTACACCGCTATGAAATTTTTTCGGGGTGGCACGATCACGTAGCCATCGGGGATAAATCCC  
 ACAAATTCACAACCTTGGCTCATCCCTCCGACTGCACTTGACCTTAGGCCACGTGCTTCCG  
 CATGGACTCAGGAAGGACTTCCAGGTGCGGAGTCCTGTCTGGATCGCGATCCTCGAGAGTC  
 TTCCCTTTCTCGTCACTTCCCTCGTTTGACGGAGTAACTTGACGGGGGAAAAAAAAAAGTC  
 ACCGAGCGCTATGAGCGCTCTAGTTTACGCGAATAAACGCGGGGTAACTGAGGC

300. >MSTRG.6161.1 Gene=MSTRG.6161

TGTTAACCTTCTTTAAATCCAATTTTTTCGAATCTCCACCATTTTGACAATCGAACGCAATCCG  
AGAGGAAATCTTTGTACACGATACAGAATATGGAACCTGAATGTAAACATTGTGAGAGA  
ATAAAAAGAACGCTCGTCTCTCCATTGTTAATTTATTCGGTATTTTCCTGCGGAATTGCTCTC  
CAAGGAAGGGATAAGTATTCGAACAGGATGCACATGATATAATAATATAATGACGATCAC  
GAGGTTATGAGAAAAGAAATGCGACCTGATACGATATGAAACACAGGCTTTCATTTTATCC  
TCCGAAAATAAACAGCGTGGAATAATTACTGAGAGAAGCTTATAATTTTTTTAAGATTGA  
ATAACTGTTACTAGTCATCAATTAGAGAAGACAATTGTTGCGTAAATTTTCTGATCGAAACT  
TGAAAAGAAAAATTCTGAAGGGCAAAGAAACGATGAATGGAACCCTCCTCGCAGCTGAGG  
GTAAAAAAGGACGAACAAGATGGTGCCGTGAATGACGTTGTGTTGCTCTTTCGATGTGTA  
TGGAATAAAGAATGACTAGTCTGAAATGCACCCTGTCTCGACACGATCGTACTGGGTACAC  
AAGGGATTGAAGCAATTTCAAATTCCTCCCTCCCTCCCGTTTAACATCTAACATTTGGCTAAG  
CCGCTGGTGCAAATGAAGGAGAGGAGGGTTCGCGAAAGCTCATTGAAATTCATTAACCC  
TCCGCTTCCGCCTTTTCTCTTTATCGCCCCCCCCCTCCCTCTCCCCCTTTTTCTTAATCCGAA  
TTTAACAACGAAGCACATAATAGGTTAGGCGTCGATAATTTTACGATCCAACCTGAAAAT  
AAATACTTTCTCCGCGAATAATAAATGTAATTTTATTATTTCGAACGATCGAACGTTTAATT  
TATTGTACGTGGTTTTCTCGTTTTTGCGCGCGTTCAGGTTTGCCCGCCCTTTTTCCAAGAAAT  
GCGGGATTTCGAGTCCAGGCTGTATTTATCGCCGATGAAGCGTAGATGAACGAAACGGCCA  
ATGTACCGTGCCTAATCGGACTCGTATATTATTGGAAAATCACGAACCGTTACGAGCGAGG  
GAGTAAAAATGTAGCTTCTCCGTCGACAAATATATCCTGTAATAAATATTATTGCTTAATT  
TAACTCGAAACGATGAAATAACTCGACTTTTAACGATCAGTTGTATTATTGAATAGAAAAA  
AAAAGAAAACCTCTCGATATCGATTATAAATGTTATTTCTATATCAATATTTCTCTGATAAAT  
ATTGTAATAAATTCTCGCTTTAGATTTATTCAATTTTAAACGATTGTCCGATC

301. >MSTRG.6173.1 Gene=MSTRG.6173

GTTTTACAACAGTTATCTTAAAGTCTATAAATCATGGTTATTAGTACTCGTAATAATGAGAA  
CTCTTAATGGATTCAATGCATCGTATTGAAGATTTTGGAATTTGCCAAAAGCAATTGATAA  
TAATGTTCTTTCATGCAACAGATATGTGAATATATGCACATTTTCAAGGAACAATCGATACA  
AGTATTTAATTTCAATAATTTCAATTAAGTATAATCGAACACTTCCTGAAAAGGGGGATTT  
ATTAATGTTAATCAATTATAATTTCCGCGTGTATAAATGACTATCAAGGTCTCGCGCCATTA  
TCATCGATTTAAAATATCAAAGTATTTATAAATGCGCATGCTCGGACTCAAATGGCGCGGC  
AGAACACGTACAAGAGTGATCGAGACAGAATATTAGCGGGACTAGCGAAGCTGAGAAGG  
ACATCGAAGTAAAATGGCTGCAGCAAGTGCCAACATATACTTACACTTGTACTTTTCACGT  
ATCTTCTGGTAATTTTCGAGCATGATCTCGCGTGATATTTGACCACGATTAAGGGCACGGTC  
ACCAATGGAACGCATGGACACAACATGGCTGCTAGACGCGCGAAGCAACCAAGACGACTT  
CGCTTCGATACTGAAGCACGATAAGTGCTACGCACGCCACGTATGACCGACTGTCACTGTC  
TGCTGTGCTCGCTCGAGGGGATGAAGGGACTGTGTATGGTTCTGGTTCAATCATGTTTCACG  
CAATGTGCGCCGATACATACGATCAACTGTCAAGTGGGGAAAGCGGTAATACCTAAAAGAC  
GGAAATAGATATAAATTGTCCATCTGCCGGGACGTTTTGAAAAGAAAGAAATGATCCGCA  
CGGGAGCGAGGCGAAGCCTTATCTCGAACCGAAGTGTCACGTTACAAAACAGAAACATTG  
GGGATTCGACGATGTTTACCATGGAACGGCAACACACCACGAATCGGCGTGGAATCGAAT  
GAGATAAAAGTCGAATGGGTGTTTCGTCCGGACGACATGGACGCCTCGTCTTCGACTCGTTT  
CTTGTTGTACACACGGTCCCGAGCCGTGTACGCTCACGGATACACACACACACGACACACA  
CGGTCCCGAGCCGTGTACGCTCACGGATACACACACACACACGACACACGCTCCCGAGC

CGTGTACGCTCACGGATACACACACACGGTTGGGCCGGTATACGTGGCAGGCAACACACG  
TATAGGAAGGCGAGGAACGCAGATTGCTAGAGGCGCTGTTCCGCTGACCTACTCTACGATT  
ATCACTCACTATAGGCCGATCGCCGGTGCAGGTGCGTGTGCGTTAACTAGCGTTGCCAACT  
ATACCTCCTCGAGGAAAGGAGGACGCGGTGCGGGGACGTAATCAAATAAACATTTTCGGT  
CCTTTTACCGATTTCTTCTCCTCCAACCCGATCTCTTTTCATCCAAATGTAATTTACATCCCA  
ACGAATATTTATCTCACGCTTTTTTACTCCTCAGAATTGCGATTATTGGACGATAATATTAAT  
CTTCTCTTGACGAGTTATATTGAAAGATTTTTCTTTGAAAAATTCATTATCTCGTGAAATTT  
CTACCGTGATACGCGTGTAATACGTCCATATTTTCATCCCGTCAATATTTTCGATCGTTACATC  
GATCGATTGCAACGAGTTTATCCATTTATCAGCGTAAATGGACGTACCTCGATGCTTCGAAC  
AACGTCTAATTTTCATCTTTCGATTGGACGGACGCAACGAGGACAGTGTAGCCATTGATTGA  
ATCTAATCAATGATCGTTAGTAGTCTCAATGGTCTTACATTATTTACAGGCGGTATATAAAG  
TGTATTCACGAATAACTATTCTCGATATTATTCATAGATTTTCTTGGGCAATAATTTGTA  
AATAATAATCTAAATATCGATATAATATATATCGATTTTATCTCTTTTAAATTTTTTAAATTT  
CAAAGTAATTAATTTATTTTCGTAAAACAATCAGGAATATTTATTTTGAATAATATGAATCTT  
TTTAAATTATAAAAAAATAAATGCATACATATATATATATATGTTTCAGTATTCCTTGGA  
AAGATTAAACCAAATTGCCAGAAGAGAAATGATTAATCGAGCGAAATTTTATATATATACG  
GAAGAGAACGAATACGGGAAAGAATATAGAAAAATAACGAATCAATAAGGAATCGATTA  
TATTTTACTTTATGCACGTATCCGAGCGTTCTAAAATTCTATTCCAACCTCGAAGCGCATAGA  
GGAGAAGCGAGGAGAGCAGAGACATCTATCTCAACATCCGTATTCTTTCTATCCGCGCTCA  
TTTTTATCGTCGATCTCCTTCACGGCTCATCATCGGATTAACAGTTAATAATAAGAGTGTGC  
GCGAAGGTGCGATGATTTCTGGCAAGTATCCGCGGCGAAAGTATGGCAGATCAATTTGCGGA  
TGCGTGACCGACTCGAAAGCGAGCATGTTTTCTTCCCCGATCTTTGCGCTTCTTTAATCTGG  
TCTATCCTCCTTTTTTCCCCCACTTTTTCTCTCTTCTTTTTTGGCCATGCGCGCCAACGTCT  
ACCAATGTTTTTCTCCAGCCTCGCCTCTGGACATACTATTCCGGCTTACTATACTACTCCGTT  
TCCATCTCTGAACAGAGCTGACAGAGGCGGTTCTGAAAACCTTCTAGCTGGCAAAAAGCGT  
TCGTCCCATTCGAATGCTCGTTGAAAATTTCGGCAGTGAGTTTTTTTGCACCAAGTTGCGGTG  
TAACGAACAGCTCGGTTGCACGCGGTAGACGGTGTAAGGTTTGCTTCTCTTTTTTTTTTTT  
TTTTGGAGAAGAGAATTTATCGAATCAAGGTGACCTCCTTTTCGTTATGACACACCGTTCTG  
TTGTCGTCTATTTTCAGCGTTCTTTCTGTTTCATTTAGATACGTAAGAGAGTTTTTAAATTTATT  
ACGAACAACCTAGGAGTATAAATATTCGTGTTATTTCTAAAAACGTTATCGAAAACGTTAGC  
TATTCCTAAGCTCGAGCAAACCTCTAATTATAGTTTCATAGTTTCATGATACATTTAGCTTGTTAT  
TAACGTTATAATTCCGCAATCGTGTTTATAAATAAGGGAGGGGGGAGGGGGAAAAAAGAA  
AAAGAAGAAGCGTAAACTTCTGAAAGATAAACTCTTCCAATATTATTTTATGACGTCTCC  
GCGAACGAAACGGAGAACGATAAAATTTAATACACACAAGTTATACAAGTTCTACATTAC  
GTTAGATAATAGATATTGTTATACATGTAGATAAAATTACGCCATTAAGGAAACCTGGTTGT  
GCGACGTGAACGTGTTACACACGTAGAGTAGTGTATTTCAAACGTGCGCCTATATAAACG  
TGTTTTTCGAGCATATTTTCAAACATATGTTTCATAATGCATCACGACTTTTTTATGTGCGCTC  
ATCATATTTTCTCCCAACCCAGTGTTCTCTACTGCTAGAATTACCTCTCTGCAATATCTCACC  
GCGTGTAATAAATAAATATTACGATGACCAACATTGTGTGTGCGGCCAACGCAATATCGAAT  
ACTTGCCGTCTAAATCGTTTTTCGCGAAAAAATACGAGAGAGAGAGAGAAGTGGACAATGA  
TTCGATAAATAATTCCAAGTAACTTCATCGGTTTGGAAAGAGCGCGCGTTGTTATTTAATCC  
GCTGGCGTTGGTTCGCGCAGAAAAATAGACCGTGTCGACGAGCGCGCTATTAATAGACCGTTT  
TTTTGGACAAGCGTCGTAAAGATAACGCCGAGCCGTTGCCAAATTACAAGCAGCGCGGTTT

CTCGCGAAACAAAATTGTTTCGATTCCAGGGCACGAAGGCCGGCTAAAATGCTTGGCACGC  
GGATCCTCACCGCGGGTATGAATGATAAAATATTAATAAGAAACGTGTCTGAGCGGGGAA  
CGTAGTTGCTGTGACGGTGTTCCTCAGATTGAAAAGCAACCTTGACCCACTACTGGGAGG  
AGGCCACGTGGAGTTGTGCTATCGGGAAACCCGTACTTCGCGGTGTATACCTTTTCGGAATT  
ATCGATTTCTTTTTTTATTATTCGATTTGAGCGAGCGACAATAAGGGACCGGCATTCTTGCG  
CTCTGCATAACGACCAACGGAATGATGTAATCCGATCCTCTTATTATGAATTCCGCTCATCG  
CTACGCTTTTTTCTTTCCCCCGTAAAGCGATGTTTATAAAATATCGACCCAAAATTTTCTTA  
TTCGAATTTTGCAAATAATCGACGTCTCATTTTATCCTCTTTTTTTGCAATCTAAAAAAC  
TCGTTGAATAAATCATAGAATAATCCTGGCTCGCTAATGGAATTGGACGGAGAGTTTGAG  
TGGAAGGAAGGAGAAAGAAGAGGCGTGAATTCCAACGTGTGTCCAAGAACGACGGTGA  
CCCCGGTATAATAGGGGAAAGGGAAAGAGATACCTGTATATATAGAAATAGCAGGATCAT  
CAATAGGTCACCTGTTCTCGAGTCATCGGACGATCGATCGCCGTTTGGCAAGATCGCCGGCT  
GTTACCTAGATTTTTTCGCCCGTGATTCCAAGAAACGATTCCCTCCCCCCCCCTCCTCGCC  
CGTTGTGCCGGTAAACGGATCACTAAGGCGACAGCCGTCGTTTTATCTCCCGTCCCGGGAG  
GAGGTAGCCAGTGTCAATCGAAACGGAGTCGAATCGGGCGATATACCTCTGGCTGAAGGA  
TGGAGAGGCGCGCAACCGGCGCGCAGCAGCGTGGCTCGGGAGTATGGACCTTGCAGCGG  
TCAAAGTCGTGGCCTACTTCACCTCCTGCCTTCGAACTTTCTCCTCGTGGCGTCGTTTCGTGC  
GTTACGTTTCGAGTGCCAAGGCCTAGCGATGGGATCAAGTTCAGCGCTCGGTGTATAAATA  
TAATCCCTATCGATCCCTATCTCTTCCCAAATTAAGCAACGGAACGGAATCCGTCTCTCTC  
CATAAATTTTACTCGATACTTTTACTCGATATTTTTGGAGAATCGGATTTTCGGAAAAGCG  
GCAAATTCGAAATGCACTCGCTCGATCCCATCGCTATTGCCAACCTTCCATCTCCTTCCATC  
TCTTCTTCTCGCAATATGGATGATTGCGCCAATTATGAGAGAGACCCGTCGGATCTCGAG  
AAATCATTGATGTCCGGTTCAGTCGATCGATTTATTTTGTTCGAAGAGTATTCGGAAA  
AATTCATTGGAACGATTTTAATATATTTTTTTCCCAAAGGATATAAATAATTCAAAATTTTT  
TTTATTATTATAATTTTTATCGTTACGTTTAAAGTAAATTTTTTTTTAGAGATTCGAGAGAGAT  
CGTTTGATTTTGAAAGCGATAAATTTCAATTTACCGATAAACGTTGCTCGAAGCAAAATCGA  
ACGATTCTTCTCAATTCTTCTCGTATGCGCGTAGGATGCGCGGCTAAAAAGTATTATTGG  
GACGTTCCATTGGCCGAGTATCCGTCGCATCCGAGTATGGGCCACGATCCATAAACCGTGT  
ATACGAACCGTGCCTGAACGCGTTATATTTACGTTTCGTTTAAAAAATTTCTGAACCGCGT  
CTAAACTCGCCCCCTCTTTGTCAATCCCACTATCTATCTCCACAATTAAGCGTACGTTTCATC  
GAGGTAAGGAAAAAAGGAGAAGAGAAGTAATCGAAATGAAATTCCGGCCTAAAAATATTTT  
AAAAAATATATTTTCCAATTGACAATTTGGTTTTTTGAATGGTTTCGTTATCGAAAAACCGA  
GAGAGGAGAAAATAATAGATTAATAATAAAAGGTAATAATAATATTTCTTCATCTCGAGT  
CTACTTTCGTTTATACGCTCCTTTTACATTTGCTCGACTTCTCTCGCTCGATAAACGGTGGTA  
TTCATTTCCAAAATTATTCCTTTTCCAGAGAAGAAAGAAGATTTTCCGTATTCCCTTCTCGCC  
TGTTTTGCTCGCCAGCTATCTATATCGAAATTCATTTTCGTATCCCGCTCGCCGCGATCGCC  
ATGTTCTGATTACTCGAGGAATCAGAGCGTCCTCTATAGACGGCCGCGAGTAGATTAAATTTT  
AGCAAGTCACCAGTACACGATTCATCGCCGTGTTTCTCGTAATTAGCCACCGGTGAATGGA  
TCCACGGTATCCGGAATATTTTCTCGAACAGAGAAGAAGAATAAGCGCAAGCGG  
TGGTTCGAATAACGTGTATTAATAAAAAAATTCATTTTCAAACAGGTGTGTAACAGGTATAC  
GTAAATTTCAAATCCTCTTTTTTGAACGTTTACGGATTAAACGTTAAATATATGGGCAGC  
CGAGTGGATCGATAATTGGTCGGTAACGTTTCCAATGGTAATGTCGAGAAATGTAAATTTCT  
GTAAATTTTTTTAAAAAGCGTTTTAATTCGAATTTTATACAACATTTATCTTAATTTAAATCG

TTATGAATTCGATCGATAAGTTTCTTTTTGTTTTAAATTAAAAAAAAAAAAAATTAAGTAATT  
AATAATAATAGGAAATTCGCGCGAATTTTCAACACGTCCCACATGCGTTCCACGCGATAAG  
AGTCGAAGAGTATGAAAAGTGGAACTTTCTACTCTTTTTTTTTTTCTTTTTCCTTTTTTAA  
ACTTTTATATTAATTTTAAACGTTACGCGCGTGATATATACTCGCCA

302. >MSTRG.6173.2 Gene=MSTRG.6173

GCAGAACACGTACAAGAGTGATCGAGACAGAATATTAGCGGGACTAGCGAAGCTGAGAA  
GGACATCGAAGTAAAATGGCTGCAGCAAGTGCCAACATATACTTACACTTGTACTTTTCAC  
GTATCTTCTGGTAATTTTCGAGCATGATCTCGCGTGATATTTGACCACGATTAAGGGCACGG  
TCACCAATGGAACGCATGGACACAACATGGCTGCTAGACGCGCGAAGCAACCAAGACGA  
CTTCGCTTCGATACTGAAGCACGATAAGTGCTACGCACGCCACGTATGACCGACTGTCACT  
GTCTGCTGTGCTCGCTCGAGGGGATGAAGGGACTGTGTATGGTTCTGGTTCAATCATGTTTC  
ACGCAATGTCGCCGATACATACGATCAACTGTCAAGTGGGGAAAGCGGTAATACCTAAAA  
GACGGAAATAGATATAAATTGTCCATCTGCCGGGACGTTTTGAAAAGAAAGAAATGATCC  
GCACGGGAGCGAGGGCAAGCCTTATCTCGAACCGAAGTGTCACGTTACAAAACAGAAACA  
TTGGGGATTTCGACGATGTTTACCATGGAACGGCAACACACCACGAATCGGCGTGGAATCG  
AATGAGATAAAAGTCGAATGGGTGTTTCGTCCGGACGACATGGACGCCTCGTCTTCGACTC  
GTTTCTTGTTGTCACACACGGTCCCGAGCCGTGTACGCTCACGGATACACACACACACGCA  
CACACGGTCCCGAGCCGTGTACGCTCACGGATACACACACACACACGACACACACGGTCCC  
GAGCCGTGTACGCTCACGGATACACACACACGGTTGGGCCGGTATACGTGGCAGGCAACA  
CACGTATAGGAAGGCGAGGAACGCAGATTGCTAGAGGCGCTGTTCCGCTGACCTACTCTAC  
GATTATCACTCACTATAGGCCGATCGCCGGTGCAGTATTCCTTGGAAGATTAACCCAAATT  
GCCAGAAGAGAAATGATTAATCGAGCGAAATTTTATATATATACGGAAGAGAACGAATAC  
GGGAAAGAATATAGAAAAATAACGAATCAATAAGGAATCGATTATATTTTACTTTATGCAC  
GTATCCGAGCGTTCTAAAATTCTATTCCAACCTCGAAGCGCATAGAGGAGAAGCGAGGAGA  
GCAGAGACATCTATCTCAACATCCGTATTCTTTCTATCCGCGCTCATTTTTATCGTCGATCTC  
CTTCACGGCTCATCATCGGATTAACAGTTAATAATAAGAGTGTGCGCGAAGGTTCGATGATT  
TCTGGCAAGTATCCGCGGCGAAAGTATGGCAGATCAATTTTCGCGATGCGTGACCGACTCGA  
AAGCGAGCATGTTTTCTTCCCCGATCTTTGCGCTTCTTTAATCTGGTCTATCCTCCTTTTTTC  
CCCCACTTTTTCTCTCTTCTTTTTTTGCCCATGCGCGCCAACGTCTACCAATGTTTTCTCC  
AGCCTCGCCTCTGGACATACTATTCCGGCTTACTATACTACTCCGTTTCCATCTCTGAACAG  
AGCTGACAGAGGCGGTTCTGAAAACCTTTCTAGCTGGCAAAAAGCGTTCGTCCCATTCGAAT  
GCTCGTTGAAAATTCGGCAGTGAGTTTTTTTGACCAAGTTGCGGTGTAACGAACAGCTCGG  
TTGCACGCGGTAGACGGTGTAAGAGTTTGCTTCTCTTTTTTTTTTTTTTTTGGAGAAGAGAA  
TTTATCGAATCAAGGTGACCTCCTTTTCGTTATGACACACCGTTCTGTTGTCGTCTATTTTCA  
GCGTTCTTTCGTTTCATTTAGATACGTAAGAGAGTTTTTAAATTTATTACGAACAACCTAGGA  
GTATAAATATTCGTGTTATTTCTAAAAACGTTATCGAAAACGTTAGCTATTCTTAAGCTCGA  
GCAAACCTCTAATTATAGTTCATAGTTCATGATACATTTAGCTTGTTATTAACGTTATAATTCC  
GCAATCGTGTTTATAAATAAGGGAGGGGGGAGGGGGAAAAAAGAAAAAGAAAGCGTA  
AACTTCTGAAAGATAAAACTCTTCCAATATTATTTTATGACGTCTCCGCGAACGAAACGGA  
GAACGATAAAATTTAATACACACAAGTTATACAAGTTCTACATTACGTTAGATAAATAGATA  
TTGTTATACATGTAGATAAAATTACGCCATTAAGGAAACCTGGTTGTGCGACGTGAACGTG  
TTACACACGTAGAGTAGTGTATTTTCAAACGTGCGCCTATATAAACGTGTTTTTCGAGCATAT

TTTCAAACATATGTTTCATAATGCATCACGACTTTTTTATGTTCGCGTCATCATATTTTCTCCCA  
 ACCCAGTGTTCTCTACTGCTAGAATTACCTCTCTGCAATATCTCACCGCGTGTAATAAAAA  
 TATTACGATGACCAACATTGTGTGTGCGGCCAACGCAATATCGAATACTTGCCGTCTAAATC  
 GTTTTCGCGAAAAAATACGAGAGAGAGAGAGAAGTGACAAATGATTCGATAAATAATTCC  
 AAGTAACTTCATCGGTTTGGAAAGAGCGCGCGTTGTTATTTAATCCGCTGGCGTTGGTCGCG  
 CAGAAAATAGACCGTGTGACGAGCGCGCTATTAATAGACCGTTTTTTTGGACAAGCGTCG  
 TAAAGATAACGCCGAGCCGTTGCCAAATTACAAGCAGCGCGGTTTCTCGCGAAACAAAAT  
 TGTTTCGATTCCAGGGCACGAAGGCCGGCTAAAATGCTTGGCACGCGGATCCTCACCGCGGG  
 TATGAATGATAAAAATATTAATAATAGAAACGTGTGAGCGGGGAACGCTAGTTGCTGTGAC  
 GGTGTTTTCCAGATTGAAAAGCAACCTTGACCCACTACTGGGAGGAGGCCACGTGGAGTTG  
 TGCTATCGGGAAACCCGTACTTCGCGGTGTATACCTTTTCGGAATTATCGATTTCCTTTTTT  
 ATTATTCGATTGAGCGAGCGACAATAAGGGACCGGCATTCTTGCGCTCTGCATAACGACC  
 AACGGAATGATGTAATCCGATCCTCTTATTATGAATTCCGCTCATCGCTACGCTTTTTTCTTT  
 CCCCCGTAAAGCGATGTTTATAAAATATCGACCCAAAATTTTCTTATTCGAATTTTGCAAA  
 ATAATCGACGTCTCATTTTATCCTCTTTTTTGCATATCTAAAAAACCTCGTTGAATAAATCA  
 TAGAATAATCCTGGCTCGCTAATGGAATTGGACGGAGAGTTTGGAGTGGAAGGAAGGAG  
 AAAGAAGAGGCGTGAATTCCAACGTGTGTCCAAGAACGACGGTGACCCCGGTATAATAGG  
 GGAAAGGGAAAGAGATACCTGTATATATAGAAATAGCAGGATCATCAATAGGTCACCTGT  
 TCTCGAGTCATCGGACGATCGATCGCCGTTTGGCAAGATCGCCGGCTGTTACCTAGATTTTT  
 CGCCCGTGATTCCAAGAAACGATTCCCTCCCCCCCCCCTCCTCGCCCGTTGTGCCGGTAAA  
 CGGATCACTAAGGCGACAGCCGTCGTTTTATCTCCCGTCCCGGGAGGAGGTAGCCAGTGTC  
 AATCGAAACGGAGTCGAATCGGGCGATATACCTCTGGCTGAAGGATGGAGAGGCGCGCAA  
 CCGGCGCGCAGCAGCGTGGCTCGGGAGTATGGACCTTGCGAGCGGTCAAAGTCGTGGCCT  
 ACTTCACTTCCTGCCTTCGAAACTTTCTCCTCGTGGCGTCGTTCTGTCGTTACGTTTCGAGTG  
 CCAAGGCCTAGCGATGGGATCAAGTTCAGCGCTCGGTGTATAAATATAATTCCTATCGAT  
 CCTATCTCTTCCCAAATTAAGCAACGGAACGGAATCCGTCTCTCTCCATAAATTTTACTCG  
 ATACTTTTTACTCGATATTTTTGGAGAATCGGATTTTCGGAAAAGCGGCAAATTCGAAATGC  
 ACTCGCTCGATCCCATCGCTATTGCCAACCTTCCATCTCCTTCCATCTCTTCTTCCCTCGCAA  
 TATGGATGATTGCGCAATTATGAGAGAGACCCGTCGGATCTCGAGAAATCATTTGGATGT  
 CCGGTTCCAGTCGATCGATTTATTTTGTTCGAAGAGTATTCGGAAAAATTCATTGGAACGA  
 TTTTAATATATTTTTTTTCCCAA

303. >MSTRG.6206.3 Gene=MSTRG.6206

TTGTCATTGGATTTTTACGTGACAAAAGTGAGTTTTCGTAGAAAATTTGACAACGAATCGCG  
 TGAAAATGCCGCCGAAAAAGCGGGAAAAAGAAGTGATGGACAAAAGGTCCTCGAATG  
 GATCAAATACAAGCAGACCATGAGCTCTTCTACAGGCCTTCGAAAAGCCAACCCAAATTT  
 ATCGATTTCTTCGCACAAGAAACCAAATTTCAAAAACAAGATTCAAGAG

304. >MSTRG.6223.1 Gene=MSTRG.6223

GAAAGATCTGCACACTCGAGGTCTGTATCTTCGACACTTGCATAAAACGTAAAAAAGAAT  
 ACGAGATGAAGGTAGTGATATTTATCTTCGCACTACTCGCCACGATATGCGCAGCATTCGC  
 GTATGTACCATACCAAATGTACCACAACCAGGACGTCGTCCGTTTCCAACGTTTCCTGGTC  
 AGGGACCATTCAATCCGAAAATTAATGGCCTCAAGGCTATTAATCGTCCAATGGACAAAT

CAATGGAATATACTTATACGGTTCACGTGATAAATCTACTGTGGTGAAACAATCGATAATT  
GATGGGGTATTATAATATAATTATGAATTGAAATAAATCGTATAAGTATTTATCGA

305. >MSTRG.6244.1 Gene=MSTRG.6244

GCCTGATCCTGAGCAAGTCGCAGAGATGCCTGTAGTGGCCCAGAATTGATTTCAATGTGGT  
CGCGTTGCAAAACAGATCGAACTGCTCGTTAGCTTTTCGCTATCTCCGAGCTCATCGTTTGCT  
TCCGATGCTCCATTTTCTTCTTCTTCTGCTTCTGCTTTTCGAGTCAGTTTGTTCATTACATGTG  
TATGTACACGAAGGGCCGCTCTGCGTGCCTACCAATCAGACGTAGAGTCACTGCACCTTTTT  
TCTTAGCTTTTTTACTTTTTATCCACATTACCGCGCGTGTTCACAATCCGATTATGCACCATAT  
CACGTCGATTTATCACCATTACATTATACCGTTGTATCGGAGAACATCGCGCGATTCAATTG  
TCCACCCGACATTTGCTCTTGTGCTCCGCTTCGACTGGCCTCCTTCGATTGCGCGTCAAACAC  
TGTA CTGCGACCAAACCAG

306. >MSTRG.6246.2 Gene=MSTRG.6246

CTTAATAGTCTGCAAATTGCAGGTTCAGTGTTCATTTTATTGTGTGTGAGAAGTGTTTAAA  
CACGTTGAATAATTATATATATAGCGCAATTTTTTTATATCTTATTATAATATTGTGATTTGA  
AATTCATATTAGTTAAAATGTCGCGTATAACTATTTTATTATTACTTGCTTATTTCAATGTGG  
GATTATCTTATGGAATGGAATGTTTCATTTGGAAACAAGAACATTATATCGAAAGTGATCGA  
TTCATGTCCAGGAATATTAGATTCGAGCGATAAATCTTATTGTTGTTATGATTTTGAAAAGA  
ATGAAATGTATTGTTGTGATGCAGTGGAAATTTGCATCGAAATCATCATGGATTCTTCTCACA  
GTGATTTGTGCGGTTGCAGTCGTGTTTTCTGTGATAATATTTTGCATATCGTGTGTTGTGCTGCA  
GTTGTTGTCCATGGTATCGCAGACGTCATCAAGGAACGGTCTATGGAAGACCACCTATAAT  
ATGAATCCATTTTCATCACATCTTCCAATCTCCTGACAGAGTATATAATGTTTCCTATAATTGT  
CAAAGTATATGTATTTTTTTTAAATATTTTTTACTTCGCTTCCTATATATTCTAAACGCATCAA  
AAATTTTGTGCTTACGATTTAATTACGAATAACGTATATAAACA

307. >MSTRG.6266.1 Gene=MSTRG.6266

GAGGTGACTCGCTTTCTCGCTCGGCCCCGCTATCCTTCTGTCTTCCTCTTTCCTGCTCGAACT  
CGTGA CTGCTCGGTGTTTCGGCCGGTGCCTCTCGCGGCACCTCTCGCTTTCACTCGTCCGTGTG  
AAGAGGCTATCGCGGGCCCTGAGAGCTCAGTATCCGCCGGACCGTCGCGTG GTTCGATGTC  
GTGCGCGCGTCCACGACCGGTGCCTCGTCTCGGGATAGAAAGAAAGTGTTTTTTTTTTTTTT  
TTTCCGCCCTTTTCCCTCCCCCCTATTTCTCTCGAGTTTTGCACCGAGTTTTGTTCCGTTGTT  
GTTTCGCAGCACCGCTCGAGGGTATCGTGTTCCTGTTTTTCGGGCCGGCCACATCTCTCTG  
CGGGCACACGCGTGACCTTTGTAAAAATAGTGTTCGTTTCCTTCCTTTCGACAGTAGATAGA  
GAAGGAGAAAGATCTCTGGCCTAGGGTTTTCTCTCGCGTTGCATCGAACATGGGGAGACTCG  
ACTCGTTCAGATGCAGTTTGGGATTACTGTGATCGTAACTTTTACGGCGCTAGTAGCGATC  
GCCTCGACGACGACAGTCCATCAATTCGATATTTTACGATTATCTGTACGGGATAGATCACG  
ATTTACAGGCAAGAGCACGTGCAGGGATCGAGGCCGAAAGATTTACCTATCAGACGAAGG  
CTAGGTG

308. >MSTRG.6347.1 Gene=MSTRG.6347

GTCAAATTTACATTTATATAAAAATTATACTACAAATATACTATTCTATCTTTGAAACTTATT  
ATTTTTATTTATAAATGAAATACATAAATTTTAACAAGTATTTTCAAGTCAATCAATAAATAAA



TTACATATAATAATTTTTGAACATTCTTGAATATTATAAATTTTAACTCTACAAAACGACAT  
 TTCTCAAAAGCGTCGATGAATGTAATGTCATGAATTGTTATACGAATATGCAATGTAATAAT  
 AGTGTGTTTGC AAATTAATGTGGCAAATACAAGGTTAGATTGGAATATGACATTTGTTCTGAA  
 ACTATTATAATTTTTATCTTCTTTATTTTTACAATAAATCCATTGAGAAATTCAAGAGGAATA  
 TCAATATCAAAAGTTATAACATAATTTTGTATGATTAAAACAATTATGAAAACAATGGCAT  
 CCGAGAATTTTTTTGGAAGTGGTGGCACATTTTCATCGTGCTTTGATGTTTATGCTCAAACCTG  
 GTTGGCAATCACGGTTTCGTCTCCCAATTCTACTAGTTATTGTACTTGTGCTATGGATTATA  
 GACTTCAATTAGAAATTGAATTTGAAGTTAATCCCGAGCAACATAATCATTTGTGATTTAAG  
 GAAAATTATTTATAAGTTAATTCTAGATTATATCATTGAAGAAAATTTTAAATCATCATAGA  
 AAGTGC

309. >MSTRG.6349.3 Gene=MSTRG.6349

TTATTCTTTTGTGCAAAAATATTCTTAATTCGTATCCATGTTATTTAGCTAAAATTGCTTTAAA  
 TTCGAAATAAAAGTAATTAATTAGTTTCGAAAAATTGAGATTAAAGTTATGAGGCTAATCTTG  
 TTGATTGTTCTTCGTAAGGCTTCGTA AAAATGATGATTTTCATCGGATATCGAATCAAGGATTA  
 TTTTTCGAATTTTGACTTAGAGGAAACAAACACTGCCAGCGCAGGCGGAAATTCTTGCGTTC  
 TCTCTTTCACGACTGAATGATACGCACAGAAATTAATTTTCTCACGATTTCGTGCTTTCCTCTT  
 GAATATCGTTGCAATATCGAAGAAAAATATATTCGCGAGAAGAATCAAAGAAATAATCTC  
 GAGATGATCGGTGCCAGTACAAAAAAAAAAAAAAAAAAGAAAAAAAAAGAAACGTCA  
 GCATATATTATTTTTTCCCCCTTTTACAATGAACAATTTGCGCCACGCGAACTATGTTTCGA  
 TTA AATTGAAATGGAACGTGATAAGAAAATTTTGAACGAGAGAACGATGAAAATCCAAA  
 GGAGGTCGTTGACGTAAATTGAGTTAAAAAACAAAAGCTAGTTAATAAAATTGGCTAGTA  
 AAATAAGAAAGAAAAACGAAAAAAAAAAAAAAAAAAGAAACGATAAAGAGAAAAAATCG  
 CGCGCGCTTGATTTGCTCGGCCTAGTGGAGCTTCTTTTCTTCTTCTTGTCTTCTTCTTCTTA  
 TTCTATTTCTTCTCGAGTCTGTAAGGAGCCTATAGCAATTCGTATGTGAGACTTCTTAAAAA  
 CGGAGAAGAACTGCGGAAAGAAAAGGAATGAAAAAAGGAAAGAAAAGAAAAGCAAG  
 AGCAAAAGTAAAGAACATGCGAAGTAGGGAAGAGTTTACTCGAAGACATTTACGACGAGG  
 CGTCACGACGATCACGGCATTGAGGTATATATATATATATATATATATATATATATATAT  
 AAATTCGCGATCAATCATATTTTAACTATAATCGAAATTGTATCGATTTCGCGAATGTTTTGT  
 ACATGTATATGTATATATATTTATACGCGTATATACATATATGATCCATTCGAAACAAAAAT  
 AACTATGAGATATAAATGACGTACGTGTGCGCATGCGTGTATGATTTGCGGTGAGTGACGG  
 TGAATTCCTTTCATGTAAGTATGATTTTACTTATTCGAACTGTACTACTACTACTACATAGTG  
 CGTGATGCAACGAGTATGTGAGTGATATTGCGAAAGGAAGAATGGGGAAAAATAATTAGA  
 TGAAATGTCCGAAGAAGCAAAGCAAATATCGACAAAGAGTTGATGAAAAGCACGAGCGG  
 CTA ACTGATCGACTAAACGTCTCTAGGCTGCCACGGATTTAATCGTCGAGTTTAAATCCGGT  
 GGCGAGAGTTTGAGAGGGAGAAAAACGCCTAGCCGGAACGGCGAGCGTATACGAGAAATG  
 TCGAACTGTCATTTTCA GTTGTGTCTCTCCGAGGAGCCCGATCCCATTTCTCCTTGGAATCG  
 ATGTAGAAAAACCGAATACAATAACACATATAACACTGACGCTTTCGCCACACCATTTCTT  
 TCTTAGTTTCTCGTCGTGTATGATATTTGTGCGTGGTGAATGATCTTCGAGGATGGCAAGAG  
 CGAATAGGTCGAAAAAAAAAAAAAAAAAATCAGAAAAATAAAACCTGTGCGCTTGATTATAT  
 CGATCGATAATCCTGCATTTTGAAAGGGGAAAAATGCAAAAAAAAAAATTTATCGACGAGA  
 TATTATATTATTATGCGAATGTGAGAGTAACGACGAGAAAAAGAAAAAGAAAAAAGCG  
 TATAAATTTGCGAATATTTAACCTTAAATCGCCGCGGATTGTGACCCATTAAAGAGCTGTT

GTCCTTCTTCTTCTGAACGAATAATAAAAATAGAACATTTTTTCAGTGGAAAAATTGTCAAATC  
 CGAGGACGGATTACTTTGGTGGGTCGATCAGAAATTAAGGAAATTAAGCTTGCATTATTCCG  
 AAATTCTTGATGTGAGTTCGTAACTCCTAAACTGAAGTGCAATTGTAAAAAAGG  
 AAAAAAAGGAAAAAATGACCGTCGTTGTCCGTTTGCTTGTTCGTCTATCAAAT  
 GTATGTAATTGACGACGATGCGATGAATGTTGCGTGAGATGTTTCGAGTTTTTTTTTTTTTTC  
 CGTTGTCTTCGTACTCTTATTCTTTTTCTCTATTTTTCTCCGTTTCTTCTCTCTTTTTCTTTTT  
 TTTTTTCTTTTGATAGCCTAATGCATGTCTTGAAGTTAATCCTTTATGATGAGTGATGGAA  
 ACAAGGGCCATAAGAACAGTGCGTACACAAAATGACATTCTCCGAACATAATAATAATAA  
 TAATAATAATAATAATAATAATAATCAAAAATAAGGCAGCTATTTAATAACCGCCGTA  
 CTCTTTGGAGATTCCCGAGTAGCGTGAATAACACGAAGGTGCATTGAGGATGAAACAAGC  
 GTTCTACGTGTTAATCGATTTTAATACTTGTACTCTATCGAATCGTAGAATAGTGATTCTTA  
 ATCTGCGAACGTGTAATCATGTATTTTTGAAATTTACGAAAGACACTTGATATGGTCTATA  
 ATTAATTTTTATATAATAACAAAAGAGAAGGCTATATAAAAAAACTCTTAAGGAAAGTGAG  
 AAAAGTGAACTAAGGCGATCGTCCGTTTTACTTGTTAATTTTTTTTTTGCTTTCTTTTTCTT  
 ATTCCTTTTTTTTTTATTTTCATTTTATTTAGTCAATCTTTTTTCCCCCGTTTGATCGAGTGGCT  
 GCGAAACAATTTTTCGAAAACGATTAAGAATTATTATTAATGGCATAAAGGGTTAATTTT  
 GGAAATGGAAATGCTTCGCTCGTAACGTTGATGCGCGAAAGGAGATGTGAATCGAATCAG  
 ATGCAACAATGTCTGAATCAGTTTGAAACCAGTTTCTTACCTGTGCAGGCAGTTGTTTAATT  
 TCGCGTTTTTCTCCGCCACTTTATGTTCACTGTAGGGATTCAAATAATTATTGAATTAGAAAG  
 AGAGCCCCAAAAAAGAGAAATGTTTGTTTTAAACCGGAAATGGCGGCGATGGGGGGG  
 GACTTCGATGAAACAATGACACGTCTCGTCTTTAAATATTTTCGGGAAATAAACGAGTTTTC  
 TTTCGACGGCGAGACGTTCAATTGTTTCAACGCCGTTCCCTCACCGTTTGCTCACCGAATTCTA  
 GTTAAATAATGAAAAAAGAAGAAACGAAGC  
 GTTTTTTAAATTAAACGAGATAAACGA

310. >MSTRG.6380.1 Gene=MSTRG.6380

CACCGCCACGACTTAGAGCCTTGTTTAATAGTGTGTAGGCTATCTTGTGAGAACGACTTAGA  
 AGTTTTCCATAGGTCAATGTTACGCAAAGCTTGCCATTTGGATCAAGAACGGTCGCCACTG  
 GTGCTTTGTATGATGCTGAACCATACTCTGTATGGCGACCTCGAGTGACCTCGGCAGGCCC  
 GCGGCGACCGATACTGGTTCACCGACCGCGGAGGTCATAGAACCGCCCTCGGGTTTCGGGG  
 CGTTCGGGTCTTTGGGATTGGCCGCGATTCGAGCTCGATGTCGTCTCGTCTCGTAGAATTCTG  
 GGCAATGGGCGACGTTTCGGCCGTTTCAATGTATTGAGCAATTGTTGAATTTTCGCTGACAC  
 TTTCCAACGGCCGGTAGTCCCGGTGTTGTTCTGATCCTCGACCACATGGTAACGATTGACAC  
 GGTGCGGCGCCCGGTGCGCTGGCCGACTGTTGAGCGGCCGGTGTGTTGCTTGTGTGCGTCACG  
 TCCGGGGGCTGGATGTTGCAGTACGCGTGGGGCGTGATTCCGCGATGTCGGTAATGTCCG  
 CACCAGGAGGTCTCCTAGCCGGTGGTCTCGGAGGCGGAGGCGTGTCTCGCGCCGAACCGGT  
 GCTGCTGGTATCCGACAGTCCTGTGCCCGTTGGACCACCAGCACCAGGACTTTCTTCGGTAA  
 CAACGCTGTCTTCGTCGCTACTCGATTCTCCACTATCGCGGCGCTCTCTGTCTGGGACTTCTGG  
 CCATCACGGAGGTTCTTTTCGATGGCATCGGTAAAGATGGTTTCGGACGACCCTGCATTGCT  
 GCCAAAGCTTGTTGCACCGCCTCCTGGCGCACCTCGGAATGATAGCGGCTCTCATTGCGCG  
 TGAGTCTGCGATTGCCGCGTCTCGCAGCCGCGGAGTTCGAATTCGGGTGTTTCCGGTGGAG  
 CCGCCAGATCCCGGGGGACTGGCGATTCTCCAGGTACTAGCCGGCCTCCTGAATGATAGC  
 GCTTCTCGTTGTGAGTGACACGGCGCTGCGTGCGGCGTGACGTGGCTGTGGTTCGGCCACC

GACACCGATACCGACCCCGACGCCGACGCCAACGCCGACGCCGACGCCCCACCACCAAC  
ACCACCACCACCGCTTCCATAACCTGTTCTCTCGACCCCTCCGATACCGAGGACGCCGACA  
CCTCCTCCATCCTTTCCAGCCCCAGTTGCTTTGAGGCATACTGTTGTAATAGACGTGTCCGT  
TTCTTCTCATAGCCCTTTTTCGTAATATCCCCTTCAGATAACTCAAGATCCAGCTCAGCAAG  
TTTCTCCCGTACGTCCTCAGGGAGCTTGCCGATGTCGATGTTGAACTCGGCCATCACTAAGC  
CATCCGCGCCGAGATCACCAATTCTCCAGCCGTACATTCCACGACCCGTACCACCGCTCG  
GCCATCTTGCC

311. >MSTRG.6397.1 Gene=MSTRG.6397

AAGAGGAAGCATGAAACTCCATTCCCCTCGATGACCTTTCTCTTTCTGTGATTATCATCGA  
GCGTGCGCATATGCGTCCGCGATCACGCAGTAACGCACGACACGCATATACTGTTCAATTCT  
CCTTGAGAGTTGCACAACGCACCGCCTTCCCATTGTTTCGACCTCACACGGTATCGTTCATA  
TCCATTGAATCTATGGAATCCATCTCGGTGCCTGATCAAAATATAAGATTATTGGAATCTTA  
ACTCTTTCGAGAATCGTCTGCAGCAAGTATATAATTTCCCTATGGAATCTCTTTCATAATGCTT  
TTTGTTTTAATATTTTAAATATCGAAATATGTATTATTTTCGTTATATAAATAGAAATTAATTTT  
TTACATTTATAAAAAAATTGACTGGAAAATATTGAAAATTGAATTATTTTTATTTTAATCA  
TTATAACTTACGATTAACATTTTTTCAAACAAGTTTAACGAAAGTTTAATATTATCGAAAAA  
TAATACGTTTTCGGAAGCGATTGATCCAAACGAATTAATATATGGTGAAATCATATAGAACT  
TTGGATGTACTAAATAGATAATGTGCAGCTCATTTTGCAGAGTGCATAGAAAGGTGCGTGT  
GAGCAATAGTCACGCATACAGTGTAGTATTCGTAAAAGAGCGCGTGTCCGTGCTGTTCTGC  
GCGACATACACGCGCTCACGAACAAAGAAAAAGCCCTAGCGACCAGCAATGCGGCAACG  
GTGAGCGCCTGCGCGCCACGCTATGTGAGTCAAGGACGACACGTGCGCTTGAAACGACCT  
ACTTATATCGCCGTTGCTTCGTGCACGATCGGTTTCGAGCACGAACCTTTCCCGAACGTAGAA  
ATAGGACGACCAAGTCCAATGTTCTGTGAGCTACCACCCCTCCTCTTTCCTATGCGCGC  
AAGCTTCGTTAATCGACTAACCGCTATTCGCATAGCACCGTTCTTTCGCGTTTAATCTTTGAA  
TCGTAAAGATCGTTTCAGTTTCATTTTAATTTTTCTTCATTTTTTTATTCCAACGCATCGATCG  
TACATTTCTTCAATTTTTTACAATTTTACGTGTTTCATGGATATTGTGTGATCATCGTTTTATCT  
ATTCATTAAATGGTAAGTTAATATTTATCTCTGATCTTTTACGTTTCAAATGAAAAAATAA  
GAAAAAAACATTAGTATCGATACGCATATCACGGATTACGTAATGTCAATTTACGTTCAA  
CAATTACTGTAGATTTTCAAATCTTCAAATTAGCAATCAATAGTTTTTACATCGAATTTG  
AAAAGTTAAAGTTATTCTATTTCGATTAATAATGATTAAATCTAATGATTAGCTCTACAAT  
AGTTGGAATATCTGGAGAAAAAATCTTAATTGTTAGAAACCATTATGGTGCCCTATATGT  
AAAGATCGATAAAAAAATGGGTCAAAGGTTTCAATAACGCTTTCAATATAAATTAATAA  
GCAAAATTTGATTATTTTTGTCAGAATATTATCAGATGAAAAACGATACGGAAAAAAGACA  
AATTCGTATCTATGCTAACATATTTATCATGGTTTTGCGCATAGCAGCAAGAAGGGTTGGTT  
GAAATCCATCCCCGTGTTTCGTATTCAAGAAATATATACACACTACTACAATGATCTTTTGA  
CCTGTAACATGGAATCCAAAAGCGGTGGGTATGAAGGCTGTCTCGATTTCGTCGGTTTTCTTC  
TCATCGACAGCATAAGTAGCGGTTTTCCGCGCGGCTTGTGGCCAGTTCCTGTTTCGACCATCA  
TACGATCGTAGCGAAGCGCGGGCGTGTGGAATCTTCCAATATATACCACACACAAAGATAT  
GTCGATGGCTTCTATGTGTGCGCACACCTCTCGCAAGTAGCAACCATAACATACACGTGTGTG  
TATTGTATACATACACATATGTATATATATATATGTATATTCATGTGTATGTGGTGTCTCGC  
AGAATATCGTTTGTGTAAGATTGAGAGTGGCCTCGTGTGCTTCCTACGTATGTGTAATTGTG  
TGCCTCATGGATAGTGAACGCCGCGGAATTCGTGGTGTGCAATCGACCAATGGCAGGCCA

AGTAGCAACGGCTATGCACCAATCAGAGAACAGAAATGCTCGCGAATGCGCGCCACACTT  
 ACCACCGGATGCCGATCATACTTGGTAGTGGGGATAAACTGAGAGTGCGGCACAGGCTAC  
 GCGCTCGAGCGCATCCTCGTTCGTCGCTGCTCGCCGTCGGAGTCGGTTCGTGTTCCGGTACTTG  
 AGTCCTCCTCTCCGACAATTTTCCGAAGTCTGAAGAAAGCTCTCTCGCCGTTTGCCAGAGGC  
 TCGAACGCCATCGTGGTGATTACCACGTTCTCCATCGAACGATTGTTCCAACACTTTTACTT  
 CTCATCGTTCAATTTGGATCAAACCTGCGGTCTGTGCTATCTTATCACTCCTGGGGACGTTTAA  
 AATACACGACCTTATCGTGATAAAAAAGAATTCGTGTGCGCATATCCGTTTCGATTTTTATTGT  
 GTCGTGGCGTGGTCCGTAAATTGCGTGCGTGGCGTGGTATCGAGACCGGACTTAATTGGAA  
 GCGAGCACCAAATTTCAAATAATTGGCTGTGAAATCATACATACTGCCTTGGACTATTCACT  
 GTGCACCATTTTTTTTTTTATCTTTTTATAATTTTCTGTACAAGTGATCGCGATCTCTAAAGA  
 GTAGTTATTGCGGAAATTGTGCATTTGCATCTAACGAGCGATTTTAATAAAATCGAATCATTT  
 GAAAATTCAACTAATCGGTCATCGGTTTTATCATTTAATTTGTATTGTGTTTCTTTTCGAATA  
 ATAAATTATAATTTTTTATTTTCATAATTTATATATAAACATATCATATATAATTCATTGTAA  
 AAAAGAACATTGTTTCATTCAATATAATAGCACATGTCAATCTATTTTCGCATATAATTTTTCC  
 GATTTATATCGTGTGCAGTGAACCTCCGATAAGTGCCAGCGCGGCACATGGAAATCTAACAG  
 ATCTTTTTTAAAATCAGTTATAATCGTGAAAGCGAAGAAAAAGAAAAATATGAAATAATGC  
 AGGAAGATTCTATTAATTTGGTGGATAACGATCTGACGACTAAAGATTACTCTTTGTGCAC  
 ATAAAAAAGGATTAAGCAGAAACGTTGTTTCATACGTTGGCGGTGCTCGTGTCCGTGTTCTC  
 TGGCTATCAGTGGGTAAAGATGGCGGTCTCGTCGTTCCGTTGGTTCGTTGGTTGAGTAGTGA  
 GAGGGGCAACTGTGACGCAACCTAACGTCACGTGATCAAACCGTGGCTCTGCTCTCGCTGG  
 GCCAGTGTGTGATCTAACGTTTGTTACGGCAGTTGGTGGAAAGATAACGCTTGAAGAGTGC  
 AGGATAGACAAGGAGTACTTTTTTCGACGTTGCTCTCGATGGCTCACTCGTTGCCCCACGCA  
 ACACCTTGATCTTTTTCTCGGTGCTAGGTCAGTGGGGGTGAGAACTGGCTTGGCTCTCTG  
 TGCTACGATAGTCAGTCTTTTTCTCTCTCCTATCGGCTTTGCGACATATCTCTCTCGACGTCA  
 ATCGAAGACAGTCTCATATTTACAAGAAGATAATACATTTTATTTTTTTTTTTTGTATATT  
 TTAACGAACGATAATTCTATATATATATATAATTCTATATGTATATCTATATACATATATAT  
 ATATACATAGAATTGTTTACTGGTATTTGTGGGCTCAGCAGTGAAAACCGTGTTCCCCCAGC  
 TGTAATCTTCTCTGTTAAAAAGGCTCTGGGATCAGGGAAAACACTGCGCGAGTACTGACTA  
 TTCTTCAAGCGTATCATCTTTTCGTCCTTCTAATCGTGAACAGCTTAACACATATATATAAA  
 TTTTTTTCCGTTGTTAAGGTGTATTCCGTATTTAAAGCGTAAAGTGCAAAGTTCGACCAAG  
 AAATTTAATTCTCGAAATAAAGGTAAATGAACTAATACATGCAATTGAGAAGTTTGGAAG  
 TAACCACTCCTTAGGAAGAATGGGCAGGTAGGAGACGATGATGGAATGAGATATACTGTG  
 TGTGCACATACATACAAGGAGGAAAGGGAAGTGGGACTGGCTTGCCTTGTGCCACTTTATA  
 CATCGCGGATCATCACGAAGAGGTGGGGTGGGGATAAGGAGCGTGTTGAGCGACAGTGGG  
 ATCGACGATGAAAAGGAAGTTAGCGATAGCCTTAAGATACGTCAAATTTCTTAAATACGTA  
 AAACATAAGTTAATTACGATTATATGTTAATAATTCAAATGATATTAACAGTAGAAATGCA  
 ATTAATAGGAGAGAAAATATTATATAACGTATTTTCATCTTGTTAATATATCTTTTCCATTTTT  
 TTTTACATGTTATGTTACGGAAAAAATTGTCAATGGCTGTTTTGCGAGATTGACATTTACAA  
 CATCTAGATCTTCGATCTTCACGCTTGTAATTTCAAGAATTTAAGAGGTGAGGAATTGAATG  
 GCTATCGCTAGACACAAAAGTCCAAGGCGGTTAAAG  
 AATAAGTTGGAGAGACAAAGAGCGGAAGAATAGAGACGAAGAAAGAAGAGTGAAGTTT  
 CTCTACGTAAAGAACTTGGGGAGAGGGGAGAGGAGAATGAAATGATGTGATATAAGTATG  
 AGAATCCAGTGGTGGGGTAGACACCAGGCAACCAGGCCTTGAACAAGCGAAAGAGAACA

AAAACCTTCGGATCCTCGACCGTGCTATACGCGCTATATTTTACATTTTCATAAAAGTTGTTCA  
AAAATCGACTATTACTTCCTCTTTTGTCAAATCGTCGTTTCCAGTTCATCTCTAAAATATATA  
ATCGATATTTTTTATCAATTCAAATTCATTCCATGTTTAA

312. >MSTRG.6397.2 Gene=MSTRG.6397

CTTGAGAGTTGCACAACGCACCGCCTTCCCATTGTTTCGACCTCACACGGTATCGTTCATAT  
CCATTGAATCTATGGAATCCATCTCGGTGCCTGATCAAAATATAAGATTATTGGAATCTTAA  
CTCTTTCGAGAATCGTCTGCAGCAAGTATATAATTTCCATGGAATCTCTTTCATAATGCTTT  
TTGTTTTAATATTTTTAATATCGAAATATGTATTATTTTCGTTATATAAATAGAAATTAATTTTT  
TACATTTATAAAAAAATTGACTGGAAAATATTGAAAATTGAATTATTTTTATTTTAATCAT  
TATAACTTACGATTAACATTTTTTCAAACAAGTTTAAACGAAAAGTTTAATATTATCGAAAAAT  
AATACGTTTCGGAAGCGATTGATCCAAACGAATTAATATATGGTGAAATCATATAGAACTT  
TGGATGTACTAAATAGATAATGTGCAGCTCATTTTGCAGAGTGCATAGAAAGGTGCGTGTG  
AGCAATAGTCACGCATACAGTGTAGTATTCGTAAAAGAGCGCGTGTCCGTCGTGTTCTGCG  
CGACATACACGCGCTCACGAACAAAGAAAAAGCCCTAGCGACCAGCAATGCGGCAACGG  
TGAGCGCCTGCGCGCCACGCTATGTGAGTCAAGGACGACACGTGCGCTTGAAACGACCTA  
CTTATATCGCCGTTGCTTCGTGCACGATCGGTTTCGCAGCACGAACTTCCCGAACGTAGAAA  
TAGGACGACCAAGTTCCAATGTTCTGTGAGCTACCACCCCTCCTCTTTCCTATGCGCGCA  
AGCTTCGTTAATCGACTAACCGCTATTTCGCATAGCACCGTTCTTTCGCGTTTAATCTTTGAAT  
CGTAAAGATCGTTTCAGTTTCATTTTAATTTTTCTTCATTTTTTTATTCCAACGCATCGATCGT  
ACATTTCTTCAATTTTTTACAATTTTACGTGTTTCATGGATATTGTGTGATCATCGTTTTATCTA  
TTCATTAATGCAGCAAGAAGGGTTGGTTGAAATCCATCCCCGTGTTTCGTATTCAAGAAAT  
ATATACACACTACTACAATGATCTTTTGGACCTGTAACATGGAATCCAAAAGCGGTGGGTA  
TGAAGGCTGTCTCGATTTCGTCGGTTTTCTTCTCATCGACAGCATAAGTAGCGCGTTTTCCGCG  
CGGCTTGTGGCCAGTTCCCTGTTTCGACCATCATACGATCGTAGCGAAGCGCGGGCGTGTGGA  
ATCTTCCAATATATACCACACACAAAGATATGTTCGATGGCTTCTATGTGTGCGCACACCTCT  
CGCAAGTAGCAACCATACATACACGTGTGTGTATTGTATACATACATATGTATATATATA  
TATGTATATTTCATGTGTATGTGGTGTCTCGCAGAATATCGTTTGTGTAAGATTGAGAGTGG  
CCTCGTGTGCTTCTACGTATGTGTAATTGTGTGCCTCATGGATAGTGAACGCCGCGGGAAT  
TCGTGGTGTGCAATCGACCAATGGCAGGCCAAGTAGCAACGGCTATGCACCAATCAGAGA  
ACAGAAATGCTCGCGAATGCGCGCCACACTTACCACCGGATGCCGATCATACTTGGTAGTG  
GGGATAAACTGAGAGTGCGGCACAGGCTACGCGCTCGAGCGCATCCTCGTTTCGTCGCTGCT  
CGCCGTCGGAGTCGGTCGTGTTTCGGTACTTGAGTCCTCCTCTCCGACAATTTCCGAAGTCT  
GAAGAAAGCTCTCTCGCCGTTTGCCAGAGGCTCGAACGCCATCGTGGTGATTACCACGTTT  
TCCATCGAACGATTGTTCCAACACTTTTACTTCTCATCGTTCAATTTGGATCAAACCTGCGGTC  
TGTGCTATCTTATCACTCCTGGGGACGTTTAAAATACACGACCTTATCGTGATAAAAAAGA  
ATTCGTGTGCGCATATCCGTTTCGATTTTTATTGTGTGCTGGCGTGGTCCGTAAATTGCGTGCGT  
GGCGTGGTATCGAGACCGGACTTAATTGGAAGCGAGCACCAAATTTCAAATAATTGGCTGT  
GAAATCATACATACTGCCTTGGACTATTCACTGTGCACCATTTTTTTTTTTATCTTTTTATAAT  
TTTCTGTACAAGTGATCGCGATCTCTAAAGAGTAGTTATTGCGGAAATTGTGCATTTGCAT  
CTAACGAGCGATTTTAATAAATCGAATCATTTGAAAATTCAACTAATCGGTCATCGGTTTTA  
TCATTTAATTTGTATTGTGTTTCTTTTCGAATAATAAATTATAATTTTTTTATTTTCATAATTTAT  
ATATAAACATATCATATATAATTCATTGTAAAAAAGAACATTGTTTCATTCAATATAATAGC

ACATGTCAATCTATTTTCGCATATAATTTTTCCGATTTATATCGTGTGCAGTGAAGTCCGATAA  
 GTGCCAGCGCGGCACATGGAAATCTAACAGATCTTTTTTAAAATCAGTTATAATCGTGAAA  
 GCGAAGAAAAAGAAAAATATGAAATAATGCAGGAAGATTCTATTAATTTGGTGGATAACG  
 ATCTGACGACTAAAGATTTACTCTTTGTGCACATAAAAAAGGATTAAGCAGAAACGTTGTT  
 CATACTGTTGGCGGTGCTCGTGTCCGTGTTCTCTGGCTATCAGTGGGTAAAGATGGCGGTCT  
 CGTCGTTCCGTTGGTTTCGTTGGTTGAGTAGTGAGAGGGGCAACTGTGACGCAACCTAACGT  
 CACGTGATCAAACCGTGGCTCTGCTCTCGCTGGGCCAGTGTGTGATCTAACGTTTGTACGG  
 CAGTTGGTGAAGATAACGTCTTGAAGAGTGACAGGATAGACAAGGAGTACTTTTTTCGACG  
 TTGCTCTCGATGGCTCACTCGTTGCCCCGACGCAACACCTTGATCTTTTTTCTCGGTGCTAGGT  
 CAGTGGGGGTGAGAACTGGCTTGGCTCTCTGTGCTACGATAGTCAGTCTTTTTTCTCTCTCCT  
 ATCGGCTTTGCGACATATCTCTCTCGACGTCAATCGAAGACAGTCTCATATTTACAAGAAG  
 ATAATACATTTTCATTTTTTTTTTTTTTTTTGTATATTTTAAACGAACGATAATTCTATATATAT  
 ATAATTCTATATGTATATCTATATACATATATATATATACATAGAATTGTTTACTGGTATTTG  
 TGGGCTCAGCAGTGAAGAACCGTGTTCCCCCAGCTGTAATCTTCTCTGTTAAAAAGGCTCTGG  
 GATCAGGGAAAACACTGCGCGAGTACTGACTATTCTTCAAGCGTATCATCTTTTCGTCTTTC  
 CTAATCGTGAACAGCTTAACACATATATATAAATTTTTTTTTCCGTTGTTAAGGTGTATTCCGT  
 ATTTAAAGCGTAAAGTGCAAAGTTGACCAAGAAATTTAATTCTCGAAATAAAGGTAAATG  
 AACTAATACATGCAATTGAGAAGTTTGGAAAGTAACCACTCCTTAGGAAGAATGGGCAGG  
 TAGGAGACGATGATGGAATGAGATATACTGTGTGTGCACATACATACAAGGAGGAAAGGG  
 AAGTGGGACTGGCTTGCCTTGTGCCACTTTATACGTACGTACCGCTATCGAGATGTAGACTC  
 GATACTTTGTACCGGTCTTGTAATATTACCAGATTTGTTCTTTCTTTCTATGTCACCGACATTG  
 GCTTCACTTGTACCAGTGTGTACAATTATAGCGAATTATTATATCTTTTCGTTTTCTATTTT  
 TCTATATAAAATTTAAACGAATCCTTTTCGTTTCGATCAATATAATAATTTTCTATTTTTTATAA  
 AAAATTCAAATAAAATTCAAAACCTTTGTCTTTGTCTCTTATCACTACCATTTTGGTATTTTA  
 AGAATTATGATTCATTTTCGGACACGACAGTAGAACGAGTTGATTCCATTGGTCAATTCCGA  
 AGAGTCGTAAAAGGAATTGGGAAGTGGCTTAGAAAGGAAGGAGACGTAAAGCCGTAAAT  
 ATTTTAAAATTCGTGAAAAGAGGCGAGCGACGGGTGGTCAACAACCGCCATTTTATGGACG  
 CCACCGCATTGCGGCCATCTTTTGTATAGTAACCGAAGCGTTTCTATTTCCATTGGGGTTGC  
 TCGATTGGCTCGGATTCCATTCACGCGCTGTCTAATTTTACTCGTTGGCCTCGAATCTACCAC  
 GACATGGCTCGTTGCATGCTACCTGAATCCGAAAAAAGACATTTCTAGTTAATATTTTCCGA  
 ATAATTTAAATCTTTCGAATCCATTACTATCTTCACATATTTTTCGCTGGAA

313. >MSTRG.6401.1 Gene=MSTRG.6401

GAGCCCGGCAGTGAGGCGAAACGTTGGGCTCCGCGCGGGAGTCTCGTGGCCGCCCGCCTTT  
 TCTTTTAAGTCGGGGTGCCTTTTTCCCTTACACCCACCCCCCGCCCCCTTCTCGTCGCCCTCG  
 CGGCTCTACGGACCCATCGTCGCTCTCTTTCTCAAGTCACACGCGAGTTTATCACTCGCCTT  
 GCGACTCCGTTGATCGTTTACGTCCGCGTTACGATCACCACGGTTTCGTTTTCTTCTCTTACGA  
 TCTCTTCTTCCCTTTTCTCCCCCCCCCTCTCCCTCCCTCCCTCATTTTTTTTTCTTTTTCTTTAA  
 TTTCTATCTTCGCTTGTCTCAACGCGACACTCGATAGATAAACTTCTTTTTCTTCTTCTTATT  
 CTTTTTCTTGTCTTCTTCTTCTTCTTCTGTAAGATGTACATGTTATACGGGTACAATAAAAC  
 ACAGATTTGCAGGCTGATATCGGATTATAATTAAGACTAAGAGGGAAGGAGGAGAAAGAA  
 ACGGAGAAGGGGTAGAGAAAGGGTTATCCTATAATCGTGGAACGAAAAGTTTGCTGCGGA  
 GGATCATCGCCGGTGCGTGACCTCCGGCCCCCTAGTCACATGATCGCCGTGCGTGACGGTG

ATTTCTGTTGCTTTTCGACGAGAAGAGGATGCACAGTGATCGTTGGAGAGGATTCTAGTGTTCC  
 GATCGGTGTCGTTTCGACAGTGGTTTGTAGTTTGGGAACGGTAAAAAAAAAAAAAGTCACTCG  
 TTTGGTGATCGTTTCGACGTATCCAAGTGGACGAAGAGAAAGAGGAGGACGTGCAACGTGA  
 TTTCTGATCGCGCTGCCGCGTTGCCAATGTCAATGTAAACAGTGCTTGGAAAGACGGTCAC  
 GGTGATACACAATGGCAGTCGAACCGGGAAGACGAGCAAGTGGCAACGTGCAATTAGTT  
 GGAATTAAATGTCCGCGCGGAAATGTTCGATCGGGATCGGGAGGTGGATGAAGGTTCGAGAT  
 CGAGCTTGTGCGTGACCACGTATCCTCATCGTGGAGAACAAACGACCGTGTGGCTGGCTTGA  
 GGCCAATACAAAGTCTAGTTTAAGGGGGTGAACGTGAAAATCAGGTGGATAGTGGGGGTG  
 GAGGTGGACTCGAGGAGAGGGAGAGTAGAAGGCGAGCAGGAAGGAAGGAAGGAAGGA  
 GGAAGGAAGGAAGGAAGAACTTGGTGGGCGACAAAGACGTTTTCTAGTGAATTTATTCGC  
 GGTATTTTGTATCTCTGTGTGCAAGATGCGCTCGCGACGCCGTGACGGCGGCTGAA  
 GGACGAAGAAAACGAGCGGCGCTCGTACAGCCCTCGATTCCACGTGTCGACCCGTCCGTTT  
 ATTTTCTTTTCTTTTCCAACGAGAAAGCGCACTGCGGAGTCAACCCGTCCTCGCTTATCTCC  
 TCGACGATTTTACCGATTGCGCCGCGAGAACGCGAGTCAAGATCACGCAACGCGAAGAAGCC  
 GTGAAAGAATAACCCAGTGGCGACAGACACGGAGCCACGAAGAAACGCGGGATTGCAAA  
 AGGAGGGGGGGCGGAAGGAAGGAGGAGGGGGCGAGGCGAAGCGAAGAGCGAGCAAGTG  
 GAAGAAGCGGAGAAAAGAGGGGAGAGGGCGCGATACGAACGTACGTGCGTAAAGTTTCA  
 GAGTCCAGAGGAAAGAGAGAGTGAGAGAGAGAGAGAGAGAAAAGAAAAAAGCCAGACACAG  
 AGTAGCATCGAAAGTATAACATGCAATTGAAGGGGAAGGGGTGCGGGGCCGAAAAAGCC  
 TTGTGAAGAACTAAGGATTAGATGGTGGAGGTGCTCGAGGGGCGGGCTAGGGAGCCTAC  
 GGGGCCGATCAAGGCACCTCGCACCTACCCAGGGCCGGCCAGCCCTGGAACAGCCTCCT  
 CCAGGCCCTCGACGCCGAAACAAATCCGCGGCTGCGTCCCTCTTGCTCGCTTCCGACCTC  
 GCTCTCTTAAGGCCCTCGCTCTTCGCCAGATCGTATCGTCGAGATCCCGATTCTTCACGGC  
 GAGCGCGGTGGTCGAGGGCAGTGACAACAAGCTCGTGGACAAGCTCGGCCTCGATAGGCC  
 GATCGCGGCGCGGGAAGCCGCGAATCGGTTCCGGTGGGGAGGGGCAGGAGCGTGGAAGAG  
 GGAGGAGGCGGGGAGTAGGGAGGAGAGACGGGTGTTGGGCAAGGAGCGGATTCGACGGC  
 GAGGAGGG

314. >MSTRG.6410.2 Gene=MSTRG.6410

ATATTATATTGAAGTTTGCAGCATATGATTGCATATTTGTTGCTAATCGCGTATAAGTTTTAC  
 GTGTCCATTGAGCCACGTCAAAATATTTATTTGATACAATGGTGGAAAGTCGAATCTATGACA  
 AGATATGTCTCTCCTATTAATCCTGCAATTTTTCCATTATTGGCAGTGGTATTACTAGGAATT  
 GGAATATTCTTTACAGCATGGTTTTTTGTATATGAAGTTACTAGTACAAAATTTACAAGGGA  
 TATGTTCAAAGAATTATTAATTTCTTTAGTGGCAGCATTATTTTCCGGTTTTGGTATATTATT  
 TTACTTCTTTGGGTGGAAATTTATGTATAGGTACATTATTTTATAGAAATTTAAATCAAAAAA  
 ATTAAACAATACATTGAAATACATAAATTTTATTTTTTTGTTTCAGATTCATCTTATAAATGA  
 AAAAAATTAATTTTAAATTTATATGAAATAGCATTAAATAAATACAATTATATAGATATTAT  
 AAGAATAAAAAATAATGTATTTTACTAAATCATGCAATTATAATGATTAATCTATATATTTA  
 T

315. >MSTRG.6422.2 Gene=MSTRG.6422

CACTTTGTGCACTAGTGGTGCCGCTATCGCGGTTCAAGATGTGTGTTTTTAGGTTTATTTTTT  
 GTGAAGTCATGATATCATGTTTCGACCTATTTTTTTCATAGACATTAGTGTAATTGTGTGTA

GAAATGTGAAAAAGTAATTATTAACTTATTAAATGTGATTAGTTTAGTTAAAAGTTAAATT  
 AACTAGTGCAAGGTGTGACCGCGCGTGATTTCGAGGTAAAGGATAGCTTCTTTCTACTCGAC  
 TACCTTCCATACTAGCTTTTACAGGTTGCCACGAGATCGTTTCATATAAATGTTCTTTTTTTA  
 AGTAGATCGTCAAGGTTTTCTACTGACTTAGAGTGATTTAAAAATCAGAAGAAATAATCG  
 AAATGTTGATAAAAAATAATAGAAAAAATAAAACGAAATTGATAGCGGGAAAAATTGAA  
 TCGTATATTACGATCTCACGATA

316. >MSTRG.6517.1 Gene=MSTRG.6517

GTGATATTTTAAAGATGTCTTTTCTAACATCTTGTGTTATATTAAATAGTGTCTCAATTTATTTA  
 TGTTTCGGTTTTAAATATTTTAAAATAAAAGTTAAAAGTTCTGTTATTTTTTAAAACACAAT  
 AATATAAAAGGATCATTATGAATATTCCTCCAATTCAACAACCAGGAGCAATTGGTGTAGG  
 ACAAATGACACAGTCTGTAAATGCTCAACTTCCTCAAAATCCACAACAAACACAACAGAC  
 ACAGGTTCAACAGCAACAGCAACAACAACAGCAACAACAACTCAAGAAAACTTGATA  
 ATATTTCTAAAGTTAAATCGTTAATTGTATCATTAAAGAGATTCATTGGCCATAGCTCTTAAA  
 ACTGCAGCACATACATTACATCAAAATAGTTTAGTAGATGTTGGATCTCTAAAAGGTGGTA  
 TTGATCAGCCAGATCATAGATTCAATAAAAAATATAGAAGAGTTTTATTCCATTTGTGACCAA  
 ATAGAATTACATTTAAAAACTTCAATAGAATGTACATCGCAAATTCTAGTTCTCTAAGGTA  
 TCTTCCAGTACCTGTCATGCCACAACGTACTGATACTGTTGGTACTCAAGAAGCTTTAACAT  
 ATCCTCAATTTTAAATGACTGTAAGAGCTCAGGTTGCATATGCTCGTGAAGTTCATGATACT  
 TTAGTTTCTGCTGCACAATCAATAGCATCAGGTGA

317. >MSTRG.6565.6 Gene=MSTRG.6565

AAAAATATCTATGCTCTGTATATGATATGATATGAAAATATATCACTATTTTTTTTTATGAAA  
 AATATTAAATTTATAGCGAGTAATTTTTTTTTTATATAATAAGAAAATATTGCGCTTTCTT  
 TTTTATTTTTCATTTTACTTTTCATTTTGTATATCTTTTATTTATTTATCTATTATATAATTA  
 TGTTAAATATTTAAATTTATACATTTTACATATTTTAAATTTTCCTATCAAATTATGAATTTATT  
 AATGCAATCTATTTTGTAAAAAAGAAAGGAACAGAAGGAGATAAAGAATCGAACGATGC  
 GCTTGTGTTAAAGAATTGAGAGGAAAGATTGGAATAAAGGGAAAGTACATTAGTAATAAA  
 TGTGGGCATCCTTTAATTTATGTTAATCAGTCTGGTTGTCTTTGTTTCAGAGGCACATGGTG  
 CACAAATTGTGTTGAGTGTGCGATGAAAAACGATCGTTCAATAAAGAAAACATGGCTCACT  
 CATGTACATGCGCAATTCGTGTTTGCACATAATATTGTACTTAATGTGCCTCTGTGTTACAGC  
 CTGTGTACCACGCAAGTAGTAGAGTGGTGC GCGGGTGATACTGTTGGTTGGTTGTGAGATA  
 AGACCATGGTTTACATTTTGGTACAACCATCACACTTCATAGCCAATGCTCAGCCCGAGAC  
 AACAAATCTATTGATTTTGCTACTATCGCTACTCTGTGATGATGCTTAGGACACGACGTGATA  
 TGAAATTGCATTTAAGAATAGCATAATCGTGGGCGCTCTGTATGCTGTCATAATATTCAAC  
 GATTAAACATGATGTTGACGATGTAAAGTACGTGATCAACTTTGATTATCCAAATTCATCTG  
 AAGACTACATTCATAGAATTGGTAGAACGGGCCGTTCAAATAATTCAGGAACGAGTTATGC  
 ATTCTTTACACCACAAAATGGTCGACAGGCTAAAAGTTTGGTTAATGTACTTAGAGAAGCA  
 AAACAAATTATCAATCCAAAATAATGGAACCTGCAGACAGAAATGGAATGATATCTCA  
 CGAAATCGTTGGGGTTATGGAACCTATCGTAAAAGAGAAAAATGTTTTCCCTAAAACACATA  
 AACGATTTGAAGTGGTCTAGATTAACCTTTACAAAATTTCTAAATGTGTAACCTATTGGAGAT  
 GGAATTTGTTACAATCTCTTTCTGTGATTAGAAAAAATTGTCCATCAAGGCTCTATGTTAG  
 TTCCGTGCTCGTTAATTTTTTTATTTTTATTTATAATCTTACTGTTCTTAGTAAGTAATTATTCT



TAGTATGAAATTAGTATAAAATGAGCTATGCAAGGAGAGACTCTTTGTAAATTTCCATTAT  
ATAACAATATTTTGCATTAAATTTTATTTTCCATTTATTAACATGAAAAGAGTGAAAA  
ATATGTGATATGAAATATGCGTGAAAATGTAAGTATAAAGAAATACATGAATACTTACATA  
CTGAA

318. >MSTRG.6586.1 Gene=MSTRG.6586

CGTTCTTGAATCAGTCGAGGCAACGCCGTCGAGACGAGTGTGCTTCCTCTTTCCTTCGAT  
CGATCGATCGCGATCGCGGATTCGCTTCGAACGTATTCGACTTTGGCTCGAGTTTTTTTTAT  
TATTTTTCTTTTCACCTCGAAGGTTTCGAGGTGATTTAACATCGTGACATCGAAGAATCATCT  
GGTTAACTGGGACGATTCGAAAAGATTTCGAGGAGGCGCAAACAGGATTAGAGGAAGAA  
AAGGGGAATCATGGAATCCTGGCTGAGCGACGTGCAACGCGTGAGAATTCCACGGCCGAA  
ATTCGGCAGCGGAACTCGGTGAGGCGGTCCAATTCAACGGTGCAACACGTGCGGCCGGA  
AGTGCTTTCGCGGCAGACCCAGGACGTGGCGAAGGCCACCGAGGAGCTACGACAAGCGCT  
CCAGGACAAGCTGTGACTAGCTGATCGTCGATCGGGGGCCACCGTAAATTGATCGAGCAA  
ACAAACCCGTGTTTCGAGGATCATCGTTCAAGGATTTACGCGCGCCTCGAGTGTAATAC  
CTTTCTCTCTCTCTATTTCTCTCTATCTATCTATCTCTCTCTTTCTTCTCGCCTTCG  
ACAACGAGGACGAGTCGTTTATATTCGTGTTATTCCGTGACAAGTTTCCGGCTTCTCAGAGA  
TCTCTGGATCCTCGAAGCTGGCTTCTTTTTACTCATTTAAATGCCGCGGTTCAATTGACTCTTG  
CCGATCGCCGATGTCCGATCGGAAATCAAATTTACCGGGACGAAAAAAAAATATGGAACGG  
AATTGGAAGCGAGCAAAGGTTAAGAGTTATTCCGGATAAAGAAATGTAAAGTATGGAA

319. >MSTRG.6592.1 Gene=MSTRG.6592

TTGATATCGAGGGGAGGGCTAGGTGGGCGAAGACGGAGAGGGCGCAGTGGTCCCGCGAC  
CATCAAACCAACAACACCGTCCCGACGACACGAAACGGCGCATCCTGCTGCGCCCCCTTCT  
TCTTCCTCTGCCGATCCCGCTTCTGCCGCTTCTTCTTCTTCTTCTTCCCTCGGCCGGCCGT  
CCTCCTGTTCCATCGTAGTCGGCCACCGCCACGTCTTGCCGCCTTCGTCCACGCGGTGTC  
GAACGCGATGGATCTACGATGGATTCCGCCGAGATTTCCGGGAGATTCTGCCGAGAGCTG  
GACCCCTCTCCCCCCCCGAAACGAGGAGGATCGAGTCGATCGCACGGTCTCCGTTACGG  
CCAACACCGTATATACGGACGGAGGAGGATCTACCGTCGATCCACCGTTGGATCCGTGGAA  
ACACCAAGTTCGTTGGCAGATACCAGGTAGAACCATGCGGTTCTGTCGGCCCGGTACCAGGG  
CTCTCATGAATGGAGGAGGGTTCGCCAGGATCGATGAAGAGGGCGTGCCTTCAGGAGAGG  
ATTGGTATCCGTGACGTTTTCAACCCACCTGAGAAGGCCGCAAACGGAGTGACGTGCTC  
GATTACGTCACAAGGATAGCCGGGAACGGAGAGTAAAGCCATTCAAGTATCCTGCCTTGG  
GCCGCTCGACTCGGTCTGCGACTCTACTTCCGCTTGTGACCGTAACCGTATGATAATTAAC  
ATCAACGTTGCGGTAAGAGTCGCTGCCCTCGCTCTTCTTTCTCTCGTTTTTTTAATTACGGA  
ACGAGGAGAGATTCTTTGATATATATATATATATTATTCTTTTCGACAGA

320. >MSTRG.6636.1 Gene=MSTRG.6636

AGCCATTTTATATCAAGAACTAACATGGCACCTTCCTTATACTATCCGAACGAATTGTGTT  
AAGGATTTACAAGTTGTAAAACACGAAAAACATTAAAAAAAAAAAAAAAAAAAAACACA  
TTACATATTCATTATAAGTTTTAAACCAAATATTTAAATTAATGCCGGCCGTACCAGGC  
ATGTATCAACAAGCTCCTTCATGCTGGGATAGGGTAAACTTGGTTTTATGATTGGATTTTG  
TGTCGGAATGGCATCTGGTGTTCTATTGGGGGATATTCTATTGTTAGATATGGATTAAGAG

GAAGGGAATTGATAAACAACGTTGGAAAAGCAATGCTTCAAGGTGGTGGAACATTTGGAA  
 CATTCATGGCCATTGGAAGTGAATAAGATGCTAGTAATTGAAGAGTGTTACGTTTCACATT  
 TAGGATACAAAAAATTGTAGTATCAAAAAAATATTCTATTAATTTCTTAATAAAATATTTCT  
 ACGGAGCAAGGGCATACTTCCATTGCAACTACAGTGGTATCATCCATAGGATTTGTTTTTC  
 CTGGAATATTTAGTCCAAAACCTTAAGTGGCGAATCTTGTGAGTCATATTAAATTGTGTTGAT  
 GTGTATGGTTGGACATCATGTACATGTACATGATTTACAGAGAAGCTATCTCCTGGTGCAAT  
 ATGAAAACCTCCACCTACTCTATTTACTTCCATATAACCATAAATTTGACATCCTTGAGTAA  
 AAGCAGTTTTTCATTTTTTCCACTGATTTATCATTTTGACATTGTTTTATATTTCTAGAACAG

321. >MSTRG.6687.1 Gene=MSTRG.6687

CACCGTATTTCTTAAAGTAAAAGTAGTCTTTCTTGTTGCGCTCTCGAGCACGTATCACGCCGT  
 ATTCACCAATAAAAACAATAGACAGAATAGTAAAAAAGAAGAGAACGTTAGAGAGGGAAC  
 GTTCGCCAAGAAAGCGCAAAATTTGTGTTGCGATTTTCGTATACGTGAGTCCGAAAACGTCAG  
 TTCGTTACCCCTCTTCTCGTGCTGTATTTATTAGGAATCTTTCGCTTTTTTCGTTTATAATAC  
 GTTTTCGATCACTTGTTATTAATGTTTCAGTTAATTTAATAGACGAGTCGGTGTTGATAAGGG  
 TATCCCCTCGATTGGGAGCTTAATTGAAATTGAGCCGCGTTGGAGTAGGGATCGTACGCCT  
 GCGAGCGTTTCCTGGAGATCATAAACCTTTTCTCGGGAGCACTGTAATAAGTCTGTTGAGGA  
 TAAACCAAACCGTATTGAGGGCTGCCATATTGAGACGTATCGTATTGTTGCCCGTATTGGTT  
 CTCGTATTGTTTCGTAATAGCTGGATGGATGGGTACGAATGATTCCAATGTCCGACGGTGAC  
 AAAGAATCTAGGCTGTAGTGACGAGGAGGATACACCGAGGAATCCATCCACGGGATAATG  
 TTTGAGAATCCTCTTCCTCGAGAAGATTGTCCTCGTCATCTACATTTTCGTATTCTCGTTC  
 ATATATTTATGCCAGTTTCGTTTGCGACGTTTCGTTTTCCACAAGGAGAGAAGAGTTAAAC  
 GTCTTCCGGATCGATATCCAATTCCTCTTGAATCGTGTTCTTGATAAATGGGAACGTTTCT  
 CTTCACTTGCGTCTGAACAGATTGCTGAGTGGATGTTGGGGACTGGAACGAAGTGGTGGAT  
 GGTTTTATGGTCGTGATGATCCCGATGCAACCGCCGATTTCTCCGATCTTTTCGCCGATCC  
 TCGTTCGTGTAATAACGGGAGTAGGGCGAATTGTCCACACCTGGGGTATCTCGTATCCCA  
 GTTCATTACAGCGCCATAATCGTAATTTTTACGATCGTAGAAGGCATTGTTGAGCGTATTG  
 GAACGAGATGGTTTCTCCTCTTCGATGAGAGCTGCTTTTAATCCGCCTAATCCTGACGCGGC  
 TAGAGTTCTTTTTCCGCGGTGGACGAATAGGACGAGCTAGGATTGTTCTCTGGTTGATGGT  
 TCTGTTGGTTGCCGAACATCAACATTTCTGTGCCCGTTTAGATTTTGGTCTCATCGTTTGCTC  
 AGTCTTTTTTGTGCTTCTGCCAGGTTTGTGGCAAGGATTGGACAATCATGAGGAGGGAGC  
 ACAGAGTGAGTAGTAACCACACCCAATCGCACATCATCTTTCTGTTCACTCTGGGACTGGA  
 CTCTGTTTTCTAGATCTCTTCTTATCCGGATCTTTCTCCCAAGGGTGAAGAGAACCAGCT  
 AGTTCGGCTGATCGGGGTAGAATGAACGTTGGGGCTGAGCA

322. >MSTRG.6703.2 Gene=MSTRG.6703

ATGCGTAGCCACCTCCTCGTGGGTGGGACCCGTAATTGGCATTGCTTTCCAAACAAACAC  
 TTCTTCCAAAAATATAAATTTTATTTTAGCTTAAAGATTACATTTACATTACTACATCCTGAA  
 AGCAATGGCAAGCCAAGAGCTACGCGCACCTGCAGTCCAGTCTTCCAATAATTTAATCAT  
 TACGAATTATCACCAGACTGGCCTGCAAGTCCACTAGATTAAACATCATTGTAAATCCGTATC  
 AAGTTGGACTAGTATTGTTCTCGATACGGATAAATCGTAATGTAAAGTTTAATTTAAGCAA  
 GTAATTTTAAGTAACGCGGAGTAACGGATGGAAAATTTTTTACATTTTATAAATCAGAATT  
 TATTGTTTAAATTTATTTTACCTTATATCGTAAATTTTAGAAATTAAAAATTCCATCCGAT

ACGCCCCGCCATTGCGAGATGCGCGTCTTAACTGTAAGATAATTTAGATAAGATTA  
 ATTAAGTTATTTGTAAGCGCTTCCCGTACAAAGATACGCCTCCTTGAAAATTATGAAATCTT  
 GTATTTTAATTCATTGTTTCGTTTTCGAATATTCCTCTAAAATATTCTGCTCGTATTTCCGTCCTC  
 TTCGAGTCGAGTCGCGCAGTGCCGTATCTGGGCACGTTGTCGTAGGGCGCAAGAGTTAGAG  
 TCGATCGAGTATTCCTTTTTTTCCTTAGAATTTTCGATCGAAAGTATTTATTTTTCTCAAAGATT  
 TCTCTTGTTTCGCTTTTTCAAGGAGGATGTATCTTTGGA

323. >MSTRG.6724.1 Gene=MSTRG.6724

CTTTTGAAAGCATCCAAAGCTCCTTCGAGCTGAAGACACCTGTCGCTAGTATCGTGTCATTG  
 CAGACAACACCGTTATATAGTTTCGTGGTAGCCTGCACCTTTTCGCCGCCTCTCCTCCTCCTTG  
 CTCGCGTTGCAGATACCGTTTAGCACCTCGTGGCTGGTGATAAAATTGGCGAGGTAGAGAT  
 CGAGTTCCCGGACGGAGACGTTGATGTGATAGGGGTTGACGCAGAGGCCCGGCTGAGCGC  
 ATTCCGCAGTCTTCTCCAGCCGTTCCCCGTCCGTCGACTCCAACGGAATTGCCTTGAAGAGG  
 ATCACCATTACTAGGTCCAACCTCCATACCTTATCGGCTTGACGCAGGCAGTCGATACGGC  
 GCATTTTACCCTTCTGATCGGGATTACTAAGGACGCACATGGCCGGCCTCTTCCCCGTTATG  
 CTCAGCACGAAGTCCTCTCTGTAATCCTGCGTGATATCCTTTTCGCAACTTGCCCCAAAGCCG  
 CGAGGCCCATTTCTGTTTCACCTCCAGCTTCTCGTTCTGAAGCTCCTCCTTGCACTGACGTTT  
 CTCTTCGAGACTCATCCGTTTTTCGTGCTTCTTGTAATAACGCCTCTTGGCGGCTTGTAAGTT  
 GAACCACGTGTACGAGAAAGACTTCACGAATGGTAGAAGGGCCTCAATGAATGGATGGAA  
 CTCATCCTGTCCTACGGAAGGGGCCTGCAGGTAAGTCGAGACATCCGTTCCACCATGCAG  
 CTCCTCAGTGTATCCGGGATGAACATGAGTAGCTGGGACGTCGGCCGCGGTACAGGCTGAA  
 GCCGGCTGCGCTCCTCCAGCGAGCCCGTGCTCGCCAGTAGCGTCGTCCCGACGCCGCGCGA  
 CGCCGACGAACGCCGCCGTGGGACGGTGCTCCAGCTGGTCGGCCACCCGCTCTCCGGCGG  
 ATAATACGGCGGCACGGACCTGCTTCCCTCTTCCCCGGCTACACAACAACAATCGTATTCC  
 ACTCTCCGCCGAGCCAGGGAGCAACGGGCAACGTGTTATCCCTCGACCGAAGGCTCCAAT  
 ATATCCTCGAGTCGTCCCTCTTCGAAGGAAGGTTGGAGGGACCTTCAGGGGCGAACGGTTG  
 TCTCCGCGCGTCCGTGTTGCCGAGACACCCGGCACCGTGGTGCTCGAGGCAACCACCAGCC

324. >MSTRG.6781.1 Gene=MSTRG.6781

GGTTGGTATTTATGATAGAATCTCTCCAGAACAGTTTCTCCACTTGCAATATAATCCTTATA  
 AAAGTTAAGGAAATTGCCAATGGTATCATAGCGATGCTCACGCAGTAAATGCTGCGTTTCT  
 AATCAACGCTGCCTGCTAGTTTCTCATATTGTTTCGACTGTTAAAACGGTCAAGGCTGGTGC  
 CTCATAATGGGCCCATAACCGGCAAGGGTAATGGCACACCCCTGATCCAGGGCCCTCGTGCC  
 TGCCCTTGTGGCTGGCACCATGTTTCTGCTGTTTCGAGTCAACTTGGCCATTCACTTCCCCAA  
 CGGCCCACTGTTGGCACAAAGCCATGCTCATCCCTGCAGCTGCTTATTGGCTCCACAGGGCT  
 CTCTCCGTGTTTTATACTCTTCTCTCGCTCCATACAATGAGCGCACCAAACAAACAAAACT  
 TTCCCTCTTCGGAAGCTTGGCACAAATTACACGTCCGAAGTCCAAGCAGAAGTGGGTAGTG  
 GAATG

325. >MSTRG.6803.1 Gene=MSTRG.6803

TCTTTTCGTTTTTTTTAAATTAGTGCTTGATGCAGCGTATAAAAAGCGTAAATATATCAATATT  
 TGATGTTGAATTAAATTTTATTATGATCGGACTCCCATCTACTCGTATTTTATTATATTACCG  
 AAGCTGTGCTTTGGTTTTTCTATAATTTTTAATATTCGTAATATTCGAAAACACGTGCATATG

TAAATTTATGTGTAAGTAAGAATCTATCTTGCAGTTCAAACATTGAATACTGCATGTGTTTCT  
CATTACAGAATTATTGTATACAATATACATATATATACGTATATAGTATATATAAGTATATA  
TACATATATACACTTATACATCATCTATTGCACTTTTACATGCTTGTAAAACTAAATAATTAC  
TGCTGGTACAGTACCGTATGTAAAGGTCCTTCTACGAATTTTCAGTTTCTCGTCGTATCGAAG  
TTGAATTGTTTCTAGATTTTACATCAATATTTTCGTTGACTAATATTTAATTTAGATTAAACAT  
ATTTTCATGAAATATCATAAAAAATATACAATTATCTACAATTAATAAGTGAAAGACAATCA  
GATAAGTCTTCTTCCACTATATGTTTAAAAAAAATTATTTTAATATTTAAAACACAAGATA  
AAATGATCAAAGAATATTTAGAATCTATAAATATCCATTGTTGTATAGATTGCAGCTATTTT  
TGTTTTTTTTTGTTTTTTTGAACGAAATACTCATATTCCTCGATACACATCAAACAGAAATAC  
GTAGATAAACCAGATTCATGTAGTTCCTTCTCGTCAAACGCTCGTTATAATTTAATTGTAAT  
ATTTTGTAAGACTTACCTTGATATATTCCTTTCGTTATTCATTATATTCCTTAAACATAAAAA  
GATCAATGCAAGTCTTCAATAATCGGAAAATCTTTGGATCGATCATTCTACAATATAATTGT  
TTTCACTAAAATATTATTGGAACGTACAAATTTTTATTTAAGTAAGAAAAAATACGATAC  
GCAAGAGGATAAAAAAGAATATTTCAATTAATTTATATAATTTTTGTGTTACTTTTTGTGTAAT  
TTAAATTTGAAACACATTGTAGCAAGATTATTTATATAGTTTAAATTCCTTGCTATGCAACTG  
ATTAACCTTTAGTCCAATATAAATGCAAATATACATTTACGTATACGTACATACTTATATACG  
TATATGTATATAAAAAACATATATACATATGTCTATTTTAAACATGAGAAGTGAAGCAGGT  
ACAAATCGAGCATAGTATCGCGTTCCTTCAGGGTATATGTTCTTTACTTAAGAAGACGATGG  
TAACAATGATAATGACAATGAAAAAGCAAGTATATAATGCTATAATGTATTAATATTTTCA  
TTATGATAATGCAACATAACATATCAATATAAATACATATCAATAATTTAATCTAATTTGGA  
GATGAGTGTGCAATACTCTCTCTAGCAGTTGGTTCTCCATTTAATCTTTAAAAGTTAGAGA  
ATGTTCATAGTTTTACAAAGTTTACAAATTTGGAACTATAATAAACTATATTAATTATAT  
CAAATGCAAAATGGAGAACAAACAATCAACTCTGCTTTAGAGAGACTTCAATATATGATG  
AAGTGTATCTCTATTTATTAAGCGTAATATCTTCTAGTCAATCAATGATATATCTTCTAATTA  
ATAATAAATAAGTCTATACATATATAATTACATATCAACAGAGGAGTCACTTTTATCAGAT  
AGAAAATATATTATTTTGATATATAAAACAAAAGTGAAGAAAAAATGGCAAAAAGAAAG  
AGATGTAATGTTCCCTCTAGATGTCAATTACGGTTCAATGTAGGGCCTGGACCGAAGACAG  
AATCCCGAGGGAAATTCGTGTAAGCTTTAAGAAAAGCTTTTTCTTTTAAAGGATTAAGACG  
AACCGAATCTCCGCCTCGAAAACGTCTTGATTCTTTTAAATCTACTCCTCATCTTCTTCCACT  
TTTCTCCTTTATCCCAATTTTGATGTGTTATATTTAAGATAATATATCATTATCTCTGGTGG  
CAATTAAAATGAATCTAGACGCGTAAATGTGCGGCGCAGTACATTTTCATTGTTTTCAAAC  
GACAGATTCTAAGATGCT

326. >MSTRG.6803.3 Gene=MSTRG.6803

CTCGTATTTTATTATATTACCGAAGCTGTGCTTTGGTTTTTCTATAATTTTAAATATTCGTAAT  
ATTCGAAAACACGTGCATATGTAAATTTATGTGTAAGTAAGAATCTATCTTGCAGTTCAAAC  
ATTGAATACTGCATGTGTTTCTCATTACAGAATTATTGTATACAATATACATATATATACGT  
ATATAGTATATATAAGTATATATACATATATACACTTATACATCATCTATTGCACTTTTACAT  
GCTTGTAAAACTAAATAATTACTGCTGGTACAGTACCGTATGTAAAGGTCCTTCTACGAATT  
TCAGTTTCTCGTCGTATCGAAGTTGAATTGTTTCTAGATTTTACATCAATATTTTCGTTGACTA  
ATATTTAATTTAGATTAAACATATTTTCATGAAATATCATAAAAAATATACAATTATCTACAAT  
TAAATAAGTGAAAGACAATCAGATAAGTCTTCTTCCACTATATGTTTAAAAAAAATTATTT  
TAATATTTAAAACACAAGATAAAATGATCAAAGAATATTTAGAATCTATAAATATCCATTG

TTGTATAGATTGCAGCTATTTTTGTTTTTTTTTGTGTTTTTTGAACGAAATACTCATATTCCCTCG  
 ATACACATCAAACAGAAATACGTAGATAAACCAGATTCATGTAGTTCCTTCTCGTCAAACCT  
 GCTCGTTATAATTTAATTGTAATATTTTGTAAGAACTTACCTTGATATATTCTTTCGTTATTC  
 ATTATATTCTTTAACATAAAAAAGATCAATGCAAGTCTTCAATAATCGGAAAATCTTTGGATC  
 GATCATTCTACAATATAATTGTTTTCACTAAAATATTATTGGAACGTACAAATTTTTATTTAA  
 GTAAGAAAAAAATACGATACGCAAGAGGATAAAAAAGAATATTTCAATTAATTTATATAAT  
 TTTTTGTTTACTTTTTTGTTAATTTAAATTTGAAACACATTGTAGCAAGATTATTTATATAGTT  
 TAAATTCCTTGCTATGCAACTGATTAACCTTTAGTCCAATATAAATATACAAATGCAAATATA  
 CATTTACGTATACGTACATACTTATATACGTATATGTATATAAAAAACATATATACATATGT  
 CTATTTTAAACATGAGAAGTGAAGCAGGTACAAATCGAGCATAGTATCGCGTTCCTTCAGG  
 GTATATGTTCTTTACTTAAGAAGACGATGGTAACAATGATAATGACAATGAAAAAGCAAGT  
 ATATAATGCTATAATGTATTAATATTTTCATTATGATAATGCAACATAACATATCAATATAA  
 ATACATATCAATAATTTAATCTAATTTGGAGATGAGTGTGCAATACTCTCTCTAGCAGTTGG  
 TTCTCCATTTTAAATCTTTAAAAGTTAGAGAATGTTTCATAGTTTTTCACAAAGTTTACAAATTTG  
 GAACTATAATAAACTATATTAATTATATCAAATGCAAAATGGAGAACAACAATCAACT  
 CTGCTTTAGAGAGACTTCAATATATGATGAAGTGTATCTCTATTTATTAAGCGTAATATCTTC  
 TAGTCAATCAATGATATATCTTCTAATTAATAATAAATAAGTCTATACATATATAATTACAT  
 ATCAACAGAGGAGTCACTTTTATCAGATAGAAAATATATTATTTTGATATATAAAACAAAA  
 GTGAAGAAAAAATGGCAAAAAGAAAGAGATGTAATGTTCCCTCTAGATGTCAATTACGGT  
 TCAATGTAGGGCCTGGACCGAAGACAGAATCCCGAGGGAAATTCGTGTAAGCTTTAAGAA  
 AAGCTTTTTCTTTTTAAAGGATTAAGACGAACCGAATCTCCGCCTCGAAAACGCTCTGATTC  
 TTTTAAATCTACTCCTCATCTTCTTCCACTTTTCTCCTTTATCCCCAATTTTGATGTGTTATATT  
 TAAGATAATATATCATTATCTCTGGTGGCAATTAATAATGAATCTAGACGCGTAAAATGTG  
 CGGCGCAGTACATTTTCATTGTTTTCAAACGACAGATTCTAAGATGCTTGTATACGCCGCAT  
 GTTTTTTTTTTTTTTAATCTTTATTATAAATAATCGTCCTTTTTTTTTAATTCCATTTAAATTAA  
 AATCAATTTATCATTTCTTTTATTAATTATATATTATAAGAATTATAATATAATATTAATTAT  
 ATATTATAAGAATTATAAGATATATTTGTTATCTTAGCATCTATGATATTTTAAATTAATTAA  
 TACACTGTACAAGATATATATCATAAAGACAGAAATTAAAGTAAAAACAATAATTTTAGT  
 TGAATGTGTAATTTATTTTATTTAATAAAGCATTATAAAAAATTATAACAATTGTAATAGAAC  
 ATCTATATAATCCGTCCATAGCATTCAACTAAAAGGATTATTATTTGAAATAAAATAAAAA  
 AAAATTCAATTTTCAATTTGTATTAATAATTTAAAAAATAATTTTTTTTTTTATTATATAAAAT  
 CTATTACAGCGTGTACGAGCATTATCAGATATTTCTGTCAATTGATGAGGTGTACAGCGTAT  
 ATATATTACGTATAAGCACTTTTAATTATCTTAGTTATCAAGATTTAAATAGTGTGGTAATGT  
 AATAAAAAAATAACACACCATTGTATCTATATTACTTTCAACTTCTGATTGTTCTACTGCCA  
 AAGCATTCTTATTATACGGCAACTGCGACGTACCCGTACATTTGTAAGCAATCTTGCTTCTT  
 AAAATTTTGTACTTCTATCAACTAAAACAAAATACAATGTTCTTGGAATAAGTTCAACGC  
 CGGAATATCATTAAATAAATGTTTCTTCAGTTTATTTTACGAAATTGAAATTACCTGA

327. >MSTRG.6803.4 Gene=MSTRG.6803

CATTGAATACTGCATGTGTTTCTCATTACAGAATTATTGTATACAATATACATATATATACGT  
 ATATAGTATATATAAGTATATATACATATATACACTTATACATCATCTATTGCACTTTTACAT  
 GCTTGTAAGAACTAAATAATTACTGCTGGTACAGTACCGTATGTAAAGGTCCTTCTACGAATT  
 TCAGTTTCTCGTCGTATCGAAGTTGAATTGTTTCTAGATTTTACATCAATATTTTCGTTGACTA

ATATTTAATTTAGATTAAACATATTTTCATGAAATATCATAAAAAATATACAATTATCTACAAT  
 TAAATAAGTGAAAGACAATCAGATAAGTCTTCTTCCACTATATGTTTAAAAAAAAAATTATTT  
 TAATATTTAAAACACAAGATAAAATGATCAAAGAATATTTAGAACTATAAATATCCATTG  
 TTGTATAGATTGCAGCTATTTTTGTTTTTTTTTGTTTTTTGAACGAAATACTCATATTCCTCG  
 ATACACATCAAACAGAAATACGTAGATAAACCAGATTCATGTAGTTCCTTCTCGTCAAACCT  
 GCTCGTTATAATTTAATTGTAATATTTTGTAAGAACTTACCTTGATATATTCTTTCGTTATTC  
 ATTATATTCTTTAACATAAAAAAGATCAATGCAAGTCTTCAATAATCGGAAAATCTTTGGATC  
 GATCATTCTACAATATAATTGTTTTCCTAAATATTATTGGAACGTACAAATTTTTATTTAA  
 GTAAGAAAAAATACGATACGCAAGAGGATAAAAAAGAATATTTCAATTAATTTATATAAT  
 TTTTTGTTTACTTTTTTGTTAATTTAAATTTGAAACACATTGTAGCAAGATTATTTATATAGTT  
 TAAATTCCTTGCTATGCAACTGATTAACCTTTAGTCCAATATAAATATACATAAATGCAAATA  
 TACATTTACGTATACGTACATACTTATATACGTATATGTATATAAAAAACATATATACATAT  
 GTCTATTTTAAACATGAGAAGTGAAGCAGGTACAAATCGAGCATAGTATCGCGTTCCTTCA  
 GGGTATATGTTCTTTACTTAAGAAGACGATGGTAACAATGATAATGACAATGAAAAAGCAA  
 GTATATAATGCTATAATGTATTAATATTTTCATTATGATAATGCAACATAACATATCAATAT  
 AAATACATATCAATAATTTAATCTAATTTGGAGATGAGTGTGCAATACTCTCTCTAGCAGTT  
 GGTCTCCATTTTAATCTTTAAAAGTTAGAGAATGTTTCATAGTTTTCACAAAGTTTACAAATT  
 TGGAACTATAATAAACTATATTAATTATATCAAATGCAAAATGGAGAACAAACAATCAA  
 CTCTGCTTTAGAGAGACTTCAATATATGATGAAGTGTATCTCTATTTATTAAGCGTAATATCT  
 TCTAGTCAATCAATGATATATCTTCTAATTAATAATAAATAAGTCTATACATATATAATTAC  
 ATATCAACAGAGGAGTCACTTTTATCAGATAGAAAATATATTATTTTGATATATAAAACAA  
 AAGTGAAGAAAAAATGGCAAAAAGAAAGAGATGTAATGTTCCCTCTAGATGTCAATTACG  
 GTTCAATGTAGGGCCTGGACCGAAGACAGAATCCCGAGGGGAAATTCGTGTAAGCTTTAAG  
 AAAAGCTTTTTCTTTTTAAAGGATTAAGACGAACCGAATCTCCGCCTCGAAAACGTCTTGAT  
 TCTTTTTAATCTACTCCTCATCTTCTTCCACTTTTCTCCTTTATCCCCAATTTTGATGTGTTATA  
 TTTAAGATAATATATCATTATCTCTGGTGGCAATTAATAATGAATCTAGACGCGTAAAATGT  
 GCGGCGCAGTACATTTTCATTGTTTTCAAACGACAGATTCTAAGATGCTTGTATACGCCGCA  
 TGTTTTTTTTTTTTTTAATCTTTATTATAAATAATCGTCCTTTTTTTTTAATTCATTTAAATTAA  
 AATCAATTTATCATTTCTTTTATTAAATTATATATTATAAGAATTATAATATAATATTAATTAT  
 ATATTATAAGAATTATAAGATATATTTGTTATCTTAGCATCTATGATATTTTAAATTAATTAA  
 TACACTGTACAAGATATATATCATAAAGACAGAAATTAAAGTAAAAACAATAATTTTAGT  
 TGAATGTGTAATTTATTTTATTAAATAAAGCATTATAAAAAATTATAACAATTGTAATAGAAC  
 ATCTATATAATCCGTCCATAGCATTCAACTAAAAGGATTATTATTTGAAATAAAATAAAAA  
 AAAATTCAATTTTCAATTTGTATTAATATTTAAAAAATAATTTTTTTTTTTATTATATAAAAT  
 CTATTACAGCGTGTACGAGCATTATCAGATATTTCTGTCAATTGATGAGGTGTACAGCGTAT  
 ATATATTACGTATAAGCACTTTTAATTATCTTAGTTATCAAGATTTAAATAGTGTGGTAATGT  
 AATAAAAAAATAACACACCATTGTATCTATATTACTTTCAACTTCTGATTGTTCTACTGCCA  
 AAGCATTCTTATTATACGGCAACTGCGACGTACCCGTACATTTGTAAGCAATCTTGCTTCTT  
 AAAATTTTGTACTTCTATCAACTAAAACAAAATACAATGTTCTTGGAATAAGTTCAACGC  
 CGCAATATCATTAATAAATGTTTCTTCAGTTTTATTTTACGAAATTGAAATTACCTGAC

328. >MSTRG.6840.1 Gene=MSTRG.6840



329. >MSTRG.6859.5 Gene=MSTRG.6859

CTGAAATAATATAAAAAACAATTTTCGAAAAAATATAATGACATAATAAAGAGATTAAAAAG  
AAAAAAAATATAGTTAAATGGTTCCTTGCCTCAATTGTAGGTGAAAAGCTTCCCTTTTAGA  
GACCGATTTTAATGCAATAAAATCCCCCTCTCTTTATACAGGAACTGAAATATAGGTAGTTA  
CCGCGGAGTGGTCAAGTTCAAATCTTGAGTTCAGTCGGCCATCAGCTACGATTGACGTACA  
GTTATTTTCATATATAGCTTTTCTCAATTATTACAATTAATAATTAATATTTCGTGAAGCAAAA  
ACAATGAACATTCATAACATCCAATCGATTTACTTAAATTTTAATTTAAAAGCTAGATTGTT  
CTGTGGTCTAAATGTGTTCAAAATTAATTATGAAAAATGATTTTCATACATAAAAAATTTTCT  
GTTGCATTTTTATATTAATTTTACGCTAATTTTTATTAAAATTGTTAATTATTTTTATGTTATCA  
GTCGCAAATAAAATGCAGAGTATAACATCAAAATGGACAGAATGAACACAGAGTCGAAC  
GAAACACAGTAGCAGCACAGATAGGCTCAAGTGGCCAAGGGGCACCTGAACTGACGAGAT  
AATGGACCGATTGTCGAGAAAGAGAAAGAATCAAACGATACCGAGCACTATGCGTGATGG  
TTGTTGCAATGCAATCGTGATCATTATCGCACTTTCTTGTTTCTTTACTTCCAATGACGCACTT  
GTGACGTCAATCGAAAGAGCAAGAAGCAACCTGGCATGTCTTCTGTGCATCTTTCTCTTCA  
CATTTCTTCGACCCGGATATACGTTCCTTTGTTTTGTTTCTTAATTTGTTCTTTGATTCTTCCTG  
CGATATCTATTTTTTTTTAAAAAATAACTTTTGTGCAT

330. >MSTRG.6862.4 Gene=MSTRG.6862

CGTTGATTTCAATATTTTTATTATATCCTTCTCCCTATTTGCATTCTTTGTGCATTTTTTTCTAT  
AAATTCTAGATTTTTATATTATATTATGTCTTTATCATAATAATTATATATATATATATATACA  
CATTTTAATTTCAATTGTGCCACTATTAATATTACAATCTTATTCCGTGCCGAATCGATAATAT  
TATAAATGATATTAATAATGATTGAAGAGTACAACAAATCATCATGTGCGAGTCCGTGTTGA  
AAGACCTGCCAAAAGTAGCCTTAGATTTGAAAAGCGAATTGGAAGGTTTCAATCATGGCTG  
TATGAAAAAAGCCTCAACTGCTGAAAAGAATGTTCTACCTTCTGCTGAAGGTATAATATAA  
ATTTCAATTACCTTTTCACTAAAATTTTTGTTGCATTATTATTTTAATGTTTTTATGATTTAATAC  
CTATAATATTATAGACATACAGAGTTCCTAATTTCTTGTAATTTGTTTCGACCGATTATAATGC  
ATGTAATATTGTAACATATAGACGTACGACAAGAACGACAGCATTCTGAATTAATCCACGA  
TGTGGAAACATTTAAACCAGATCAATTGAAACACGCCGATACGAAAGAGAAGATCATATT  
ACCCAATGCCAAAGGTATCACTGTTTATTTGATTCTAGGGGAATATTTCACTCTCAGGTTCT  
CTACTTCTTCCTTGGCCGTAACAAAAGGAGGGTATTTTGTTGCTTTTGGTGCTTCGAGGTGA  
CCGAAACATACGTGACCAAACCAAGCC

331. >MSTRG.6897.1 Gene=MSTRG.6897

AATGTAATTATAGTTTGCATTCTGTATATGTTACATGTTATATGCACTATATTGATTTGATAG  
AGTGACGTAATTGTTGAGAATAGTTTATTACATTATTATTTAGATCAAGAAATTTATTCAA  
ATGTGGTATATGACTTTACCACCAATAATTATAATAGCTGTATGTTTCAGCATTACCAGCATA  
TGTGGCACCATATATAACTAAATATTTTCACGGAAATACGCAAACGAGACTTTATACTACT  
CATTTAGAATTACTAGGATATTCTAGAGATTATGAACTAGGTGGTAATAAGCATTGGAATTT  
TAAGGGTTTGGAATCCATTCCAGATAAATAAAAAGCATATTGGCTTATGCTATATTAATAAT  
ATTCATTATTTTAGTGAAGTTATTATGTAAATCATATTGTAACATA

332. >MSTRG.6912.1 Gene=MSTRG.6912



AATAATAAATTTTTTTTATGTAATTTTAAATTATCATTAATAATATGTAATAGTATAAAATACT  
 TTTGTCTGAAGGTTACTTCATTGCTGCTTTTCAATAATGGTATTTAATAACATAAAAAATTGTTT  
 TTGGAAGAAATATTTATTATGTCTGATTTTAATAACTATAAAATATGAACTTTTGCCTACTA  
 TGTATAATATTAAATTGTAACACTTCTGTTCTCTGAAAATATAATTATTTATTTTTTACAGG  
 ATAGTGTACCACTTGGCATTGATTTGCTAGCGACAATCGTGCAAAAAGTTGAGCTTTGGCAT  
 ATCTGACACATTCTGTTTATCATTGGTGTTACATAGTATTTTGAACAATTACAATTAGAAC  
 TTATTGGAAAAGTATATGGAATCATGATCGCCCCCTTCTCTTAATATAAAGTATACAATTAA  
 TGAATAGCTGCATCCCAAGGATTTTCAACCAATATGGAACATTCCATCCACTGATCGAGTTT  
 TATGGTAATTGAAATTGAAATTAAAGAATTAAATAATTAAGTAATATAAAATATTTTTCATA  
 AATTATATACTATAAATTAGAAGCATACAAGATTGAAAATCTTATTCCTTCTGATTCTTCAT  
 AATTTTTCATAATGAAAAATTGTATTGTATTAATTATAACAAAATTATGCGATATGATAAAA  
 TATTTTAATATTAAGTCTTTTAGGATAAGTAAAAAAAACATATTTTTTTGTTTCTGGAGGA

333. >MSTRG.6920.10 Gene=MSTRG.6920

CGAATTTTTTTTTTCTTTTTTTTCTTATCGAACGGAGAATTTGGAAAGCCAATGAATCCCACTC  
 GAGGAATGGAAATTGCTCCGCTCCCTCCGTTTTTCGCGTGTCTCGGTTTCGAGGTAAAGGGTGC  
 ACCGCGCAAGAGGCTCGACCATTTCTCGATCCCACGGCCCATCATCCGCCAACCATTTCATC  
 CATCTTGTTTCTTTTACTTGTGAAATTGTCGCTTGCGCCCCATGTTGCATATCTTGAAGTGGC  
 ACAACGTCATATAGCTGATCATGGTACGTTTGCCGGAATGCTGCGGCTCTTGTCTGACCACG  
 GCATTCCGTGTCGGTAATTTCTCAGCGTAGTAATCCGAGTCCGATTGTATCTCCGATTCCTTC  
 CCTCCATTATTATCGACTGGATCTTCATACGTTCTTGTCCAACCTCTTCTCCCGTTCTGCCA  
 CGTACTGTTTCTCCTCGAACAACCTCCTTCAGCTTGTTGAGCAATATGAAATCGTTGTCCGAG  
 GTTTTGCCGTAGAACTCGGACGGTATCGGTTCCCCGCCGACGGACGACGGTGAGAGATGGA  
 AGAACAACAACAACAACAGTGCCAACAGACACGGGGCTGTCCTACGTTTCGCGCTTGACC  
 TTCCCGTCATTCCCTCGGTCTGTTTTTATCGTCGACTGTGCGAAAGTCTCTCGGTTGTTACGCT  
 TTTTCTTTTCCCGATGTTTCGAATTTGTCGTCAGTCACGGGAGAAAAAAGTCTCGATTGAA  
 AATTCGATCGATTTATCGTCTCGTGATATCATCCAACGTTATCACTCGAATGATCTCGTCACT  
 TATCTCGTCGAAAAATGAAAAACCGTTTTTACCGTTTCTTTATTATTTTATTATTTTTTTTT  
 ATTATTATTATTATTATCGTTGTTTTTTTATTATTATTGTTATTACTTGTCTCGCGAAAGCGT  
 GAAGGCTAGGTGGTTCACTACACATTCACCGTTTCGCGACTATTAGTCTCGAAGGTTGGTGC  
 TCTGGTGTCTTATAAGCTCAGCTGTCCCCACCTAATCAAGTTCGGTTCGTAGACGCGGTGTC  
 GAGCCCCTTCTCGTGACCCAGCTTGGCTCCAGACGCTCGCCCATTCCTTCCCTCTTTCTTCA  
 TGCGCCTCTTTCTTCCCTCC

334. >MSTRG.6981.14 Gene=MSTRG.6981

CTAACCTCAGTGTGCGGAGAGCGACCGCAGTGTACACCATCTCCACGTTTTGGCAAAGAAG  
 AGGGCAGTTATCGTTGCCGAGTGAACGAGTTTCGATCCACCGTCGTACTTTCGATCAGCTGG  
 ACCAATCAGTGTTATTTATCTCGCCCGCCTTATCTCCCTGCCTTCTCCGTTCCACTCGGATTT  
 CCATTCCCGGTGAACAGACTTGGCGAATGAGACGCACGTACGTTGGGCGAACGTACAGG  
 ATTCGATCGAGTGATATAATAATTGGAACGCGCCGAAATCGGAGCCCGCGATTCCATCCG  
 TCGATGGCGAGTTTTCCCTCTATGGAGGTGGAGGAGTTTCGTTTCGTAACGCGCGAGTGACG  
 GAATCACGAACGGAATCGCGTTTACACGATTTTGACGGACGAGGTGACCGATCTCCTTTTCT  
 TGATGAATACGACGACGTGAGAAGAAGCACGGTCCGTTAGCCACGCGGTTGACGCTCTCA

CCGCCGGTTGCACCTCCGAAGGGGTTGACACCTAGCACGAGGAGCGTCTGCTGCGCAGCTA  
 GCGAGAGAAACGATTCCGAAGGGATCACCATCTTCCTTCGCATGGTGATACAGTGGTGTTA  
 TTGTTATTGTTGTTGTTATCGATAATTTGGTGATACACGTGCCCCGGTGATACACGAGTCAAA  
 CTGACTACACGTTTCTATGTTTACGTAATTTCAAATTGTCGTTTCGAGAGCGTGGAAGGAA  
 GAGTCGCCCCGCTCCTTCCGCTTTCCTTCTCAAGTGTTCTTTTCCGCTGTGTTTTACCGTCGT  
 GGGTCGGGAGGCGCGCGTGTCTGAACGACGTGTCTGGATACCGGGCTGGCGAGATCGGCAAA  
 ACAGTTTCAGGCTTTCGATTTCTGAAGGAGTTTGAATCGTGTGATCGTCCGCGCGAGATCGA  
 CGACACGTGGATTCGGATCCACAATTCTCGTTCCTAGCTCACGTGGTCTGTCGAATACTACC  
 GCGACGCTCTTATAGTGGCGCTTCCGCGATATAACGTATCACGGATGTTCTCTCGAGTTG  
 AAACGAGTTTGCTCGTGATCAATTTGAAAGTTGTCTGGGTTATCTGTGTGCTCGTTGAATTTT  
 ATCCATGTTCCGTATCGACGTTGCGACAACATCGGACGTGATCGATGAGTGTTCGGCCGAG  
 TGAATAGGAAAGAAAGAAAAGTAGGAAAAAGAAAAAATAAGAGACTCTCCGTCAAA  
 CGATTCTTCCGTCCTGTTGTCTGAGAATCGAAACGCGTGTGTGCCACTTTCATGTTGCGAATA  
 GAAGGAGAGGGATGACGGTGCATCATCGTTGTGCTGCAGACACCGTCTGAAGAGGAGGAAG  
 AAGACTCGTGAATTACGTAAACGACGATCATCGGTGCTGGAACGAGACATCGTTAATAGTA  
 CATCGTTGTTTGCGATTCTTCGTAGGATTTTTCGGATCCGCAAGCACGCGGAATCAAGCAGG  
 CAGCGTGAGCGCTCGGCGATCGTGTGGCCGCGCGCCGCGGACCTCTATCTTTATCAACCA  
 GGCTGTGCATTTCTCACCTACTATAGTCGTGACAGCGCAATCAGTGCCGAGAACGCTCTGC  
 ATGAGAAGCGGACTTTACCAGGGGGTGTGACGGGCGACCGGCTGGCCGGGGGCGCCGCAC  
 ACCTCCTCCATCTCTTCTTCTTCTTGCCACGACCACAACACACAATGTAACAACAATACTACCA  
 CTACTACTAGAGTCGTCCGCGTGAACCACGTTCTCAATGTACTCGATGTGAACGGTGGTG  
 GATGGGAAGAAAGGACGTGGAGAAGGGAAAGAGAGGGCGTCATGCTGCTCAAGAACGTT  
 TTCGATGTATGTGAAAGAAAGAAAGTGTGGACCGAAGGAACATTTATTTGCTGGCAGGAAT  
 CCTCCGCAGTTTTTCAACCAGACCATGCGGAGTTTTTGCAAAAGGCAATTCGATTTCAAGCCC  
 ATTCGGACAATATTAAGGTAATTGGATTTTCGACCTGGCTAGTTGTTGCCAGTGTGCAACT  
 CGCTCGATCCCAGACTGGCAACGGGGATGGGGGACAGAGTAAATGGTGTAAAGGGGTGTCTG  
 GGATTGGTAGAAAGAGGAAGATAAAAGTAGGGAGCCTGTACGCGTGTTCGCAGACCAGAA  
 TAATGGATAGTCGTAAATTTAATTGGCACATAATTATCGGGAGTTCGGGCACCAAGCAGA  
 TCGTTGCACGCCACCGATCCCCGTAATCCCGTTACCTTGGCTTAATATCGAGAAATATAAAA  
 ACCACTGTCCATTTTACAATATATCGTCCATCATCGAACAGTGAAAACTCTATTTTCGTAA  
 ATCAAACCTGGATTGATCTAATCAATCCTGTGTGACTCTTATACAAATATAAAGAAATACA  
 GATAAAGTCTTCATTAGCAGCTATCGCTTAAATTCGCAATGGAACCTTTGACTTTTTTTCGTG  
 AAAAGCTCGAGAAAAAACTTTAGTATCAGAGAACGGTCAGGATATACATATAAAGGAAAG  
 TATAGCATTGAAATCACTTTTCGATATCTCGATCGGTTATCGAGATAGGAGTGTTAAAGTT  
 TCCATAGTATTTAAAAATCGTTTTTCCAAGAATCGCGTCTCTCAGTTAGTTTAGAATAGGTA  
 AAGATAGGTCAGTGCAAACAAGTGATTGAAAATCATTATTTTCTTTCATCATGATATCTCA  
 GGAATCGGAAATTATATAAATATAAATGAAAAAGCATTTTAAAGGGCAAGATTCGCGCTT  
 CCAATGATCTTTCATCCATTGGCCGAAAGTTATTATCTTCGGTTTAGTTATAACGGCCTAAA  
 ATTTTCCAATTTTAATAGAATTTCTAAGGTG

335. >MSTRG.7015.1 Gene=MSTRG.7015

CTGAACTAGATCTTTATTAAACAATAAATTAATGAAAAATTCTATTCTAAATTTTTTAAAAA  
 CCTATTAAATTATTATTTATATATCATATAAATAAATAAAATTATGTATATTTGAGCAGTCTA

TTAAAAATATAATGTGATTTATAGATTGAGAAACATTGCATTATAGATTTTATCAGAAAGCT  
 ACTTAAATTAGAATGATAAGGGAATATTTCGATGAAAGGATACATTAAACTTCCTCTTAACG  
 ATTTGCAAAGATTGACTTACGATAAGAGATACTATGCAATTGTTTGCGATATCTTATATATG  
 ATATACATATTATACTGCAATAAAAAGCCACTTCGAAAAGACTCGAGCATTCTAAGAACAT  
 TTTTCCGATCTGAAAAGGAAATGGCGGTAACGTGATACGCTTAAGTTATTGAAACAAGTGA  
 ATTCTCATTTTTTCGTGATCACCTAGGCAACCTAGGCAACTAGCATGGCAATTAAAAAATG  
 GAGATATAAAAAACAAGTCGCATAATATCTGAAATCATCGTTTCGAATTATTAATTATTGTA  
 ATTACCGACCGAGAGTAGGTGTATTTTTGTAAACCTATGGGGAATAATGCTAATTTTCAAG  
 GCTATAGTTTATAACGTGCGCGTCGATTTATTTCGAAAAAGCGCGGGAAATAGCGAAGTTC  
 CGATGGAACCTATCGCGCTAGGGGAATCCCACTAAAATGAACTCGAGAAGAAATAAACAA  
 TAGTAGTGATTACGCGCAACCATTATTCAATGCATCAAGTGTGAATAAAATTAATTCACAC  
 GATTGCATCGAATAAGTTTCATATTGTATTTAAACGATAGGATACGATCAATTCGTTACTGT  
 AGATATATAAACTATCTCTACTTGTGTATACGTCAGAATAAATACTTAGATCTTACAACCTG  
 TCAGTTTACAGTCAGTTGAAAAATAAGGATCGATAAAAGAGGCAAAATGTTTCGATGGGA  
 AATATCGAAATATAGGGTAAATGATTTTCAGAGAGATCTGTTCTCTCTTTCTCTTTTCTCTAT  
 CAATTGTGTCACTCTTGAAGAATTCACGCAATCTATACTAAGAAAGTATATAAGAAGTATT  
 ATAGTTTACTGCTTCCATACTGATTATATTATATACATACTTCGATTTGATTAATTACCCAAT  
 AATTCACAAAAAGATTAGGTACACGATATTAAATTGCGAATACATATTAATGTATAACGAA  
 TATTCGGTATACTGTCAGACATAACAAGAGAGCCATTAAGTATAATAATATTTTTGTTTTTA  
 AATTTACATTCTGGGCATTTTTATTCAA

336. >MSTRG.7023.4 Gene=MSTRG.7023

CGTACCATCATCCAGGTCCAGAACCTATACCTGTTCTTTCTCTCTCTCTCTCTCTCTCTCTTT  
 TACCACCGACCGACCGACCGACCTAACCCAATCGACCCATCCACCGACACCACAACCTGG  
 CGAACTTATTCGATTGCCACGTTGTCGAGTCAAAAGTCGATCAATCAGTGTTTCACCGTCGT  
 TGTCGTCGTCGTGGTCGTCATCGTAGTGGTGGTCCTCAACGTTTCGATCCATCGACACGCTGG  
 ATTAACCTTCACTGGCAAGTCTATATTTATTTATTTCTTTTGTGTACACATCTTTCTTTTACC  
 ATTTTTCAACGGTTCAACGTTATCGATCGAACGTTGCCGTGACGCGTTTACGCGACGCATA  
 GATCCTCGCATCAACTGCCATTGATTTCGAACCGTAGTCACGTGACTACGGTGCAACGAAT  
 CCTTACGCAGCCACCTGGTATTTTCGCGACGTAGTCGAATCGGTGACAGTGTGCCGTGTGAA  
 ATTTACGCGTAAATTACATCAGGAATATTCGAAAGTGATATCGAGACTCGCTGTAATAGCG  
 AAGTTAAGTTTTTTTTTTTTTTCTTCAGTTGAAGCGTGATTTGTTACAGTGTTATTGCCGACTTAG  
 GTCCTTTGACAACAAATACACGTGTATACCTACTCGGTCTTATACACGGAATGGGAAATGG  
 GAATGTACGAAAATGACTGTACTTTTAAACACATGCAATCTTAATTTTAAAAGAGTAATTG  
 GTTTTTCGCTCGAACACCTTTAACTCCGCTGTTTCGAGGATGTTGAATTAAGG

337. >MSTRG.7023.12 Gene=MSTRG.7023

CATCTTTTGTGTGAAAAGAAAAATCCTCCACAATTGGAGAATTTTATTTTCCAACAAAAGTA  
 TGCTCGCGAAAAGATTGTACTTCAATAATATGCTACATCATAAGAAAAAGAAATTATCACC  
 TGGAAGCTCTAATTCATCAAATAGCACCCAAGTGTTATTTTCTATAATTCTGTTGGTTTTCT  
 GCGTCGATCGAGACGAAGTAGAGGGGTCTTTGACTTGATAATTAATTAATTTTGGAGACAAT  
 AGTCTTCTTGTCCTTTTCAATGAAATTGACCATCTTTTAGGAGATTCAATATAAGTTCTTCA  
 TCTGCTTGAAGCCATAATGGGAGACTCGACAGAGATTAAGAGGAGATCTAGAATAAAATCA

ATATGCTGTTTTAATGTGTTCAAATTATCAGAGATCTTATCAAATAGAGTTTAATCAGTTTAA  
AAACAAGATTCTTATATTTAAATTTTGTGCCATTTTGTAAAATCTTATTCCATTACTATCATC  
CATAATGATAATTAATCCAATCATTAAAGTTTTGTCAATTTTCCATTGGTAAAATTTACTTAAA  
ATCGTAATAAAAAGAAAGGAAGTTTTCAATTGTTAAAAATATTAATATTTTCTATTTTGATG  
AATTTTCAAACAAATGAGACCTAAAAAAAATATTTTAATTATTTAATCCGATGATTAAAATT  
TAATTTTAATAAATTAATAATATATTATATCATATTACATACAAAGATTTGAAAATTAATACT  
AAAAAGAAGAGAAAGCATTCTTTTATCTCGAAATGGCCGTAGCTGGATCTCTCGTCGAGTT  
CCTCTTTGAAAACATCTTAAAAAACCTCAACGCCAGAGTTTGGAACCGGTCTCGAATCCAG  
TATGGCAGATCTTTAAAGAAAAAAAATAAAGAAAGAAAAAAAATATAAATGACAAAATT  
GTCGAAAAAAGGAAAAAAAATATTGTCAATTCGATTCATTAATCGAAGATAATATTCGATAA  
TATTATAAAATGTCGAGTTGATGATAGGCGTTCTTCTATTGAAAGAACAAAAATAAAATTA  
TGTGGAGTATAAATTATACTACTATATAAAAAAAAAAAGTGAAGAGAAAAATAAAAAAGTT  
AGAAGAGATAAAATAATGAAAAGATGTGCGAGCTTAAAACTTAGTTTTTCATCAAGAAGC  
ATTTTCTTCTTATCCTTTTTTCATCTTCAATCTTCAATTCAAACCTATTCTTCCGCCGTTTATT  
AGATCTTTTTTCATATAGAACTTCGTTTGTGATAACCTAGAATAGGGAACCTATAAATGAAT  
TTCTTCAATGTTGGATTGCACGAACCTATTCTTATGTTAATCAATTAATAGTACACAATGAAA  
CGTTAATAACGTTAAGAATGAGAAAAAAGAAACTTTAAAATTTCAATATAA  
ATTATGAAATCTATGATACAGATTGTAAGAGTCAAATCGGTATATATAAATGACTCTGCAG  
ACCAAGGATGTATTATTAGTTCATCATTTTTAACTAGAGCGTGCTTTTATAATTCGCTTCAA  
TGACATCTGGCGAGTAAAATAGGATTCAGATTTCTCAATTATTCTCTGTGTGTATATTCATTG  
CAGGGTAAATTCAGTGTCTTCTAGAATCGACGAGCTCTGTGAACGAAATGAAAATAGTGAA  
ATCAAGAAAGATAAGAATGGTTAAATGGAATTTTTCTTGATCTTTATCTTGATCGTTATTCGT  
ATATATATATCCAGAGTTCAATATTAATTCCCAATACAATATGTGTTTCAATACACGGTGCA  
CGATGGTCAGTACACATGCATATATGCATAAGCGTGCGTTTCGTTCCGGTGTCCATTTTTTAG  
ATGATTGTAATGATGTTTCGATGATGATACGTATATTCGAAGCAAGACTGTCCAACAATGTTT  
TCTGAGTTAATCTAATAATGATTAGATGCCGATGTTATCTTACTTAGATAGCAAAATAAATC  
AGCAATTAAATATTTTTAAATGATTAACCTTTCGTTAATATAAATATTTATTTGTAATTGAA  
AGATCATTTATAATGTTCTCTTGATATTTACTTATTAAGGTTTAACAATAATTTCTGATATTAT  
TAATTTAAGTCAGATTTTTGCAAATCTTTAATGAATCCTTAATTATTCATAATTATTATTATC  
GATCGGAATTTAACAATTTAAATTTTATTGCCAGAAAACATAAACATGTCAAAATAACATC  
ACTAAAAAATAAGTCCATTTGCAACAATAATTTGTATTAACTCGAGCATATTGAAAAGGT  
TAATTATTCATTATGAACATAAATGTTGATATTTTTAAAAGAAAAATAAAAAATGTTACACTA  
ACTCAGAAAACATTATTTCTATATCGATCAATCGATCGTTGATAAATCGTCGATGAATCTT  
CGATTGAATCTTTGATGAGTTTTTGATGGAATCTTCCAATGTGTGCCAAAGATTCGTGATCC  
GCGCGAAATCCTCAATAAAGCTCGTCGTTCTCGCTTAGAGAATATTCGCCCTCCGCGGATCT  
TTTCATGTTCTTCCCTCGTCCTCTTTACATAATCAGCGTATTTCCCTCGCAAAATTTGGACTATT  
TTTTAGACGATTATTTTTCCCAATTGCGTGCGTCATTGCTGTTATTGACTTTTTAGCGAAGAA  
AAAGATTCTTGATTGTGTCGTCTTAAAAAAAATAATTAGAAAGATCGACATTAAATCACAT  
TTTCTTCTCTCGTTTTAATGTGCGAGGACGCGAGAATGATGTGCAATATGGTATCGAGCTAA  
CTGAAGTTAGCTAGTTCAGCGATCGAAAATTTTTTTCTAGCTTTATCTTCTTCGATCGCTCA  
AAATTTGAAATCTTTTTGTAAATATTTATATTCATGTCGTTGTATATATTTATCAATTTATTCA  
TGTTTTTTAATATCATTCTTTAAATGATATGATATTTTATTAAATTCATCAATCGGATTAGCAT  
TTGTTTTTCTATTTATAATATTATTTTTATTACACTTTTAGCCCCCTTACATGATCAATCCATGA

TAGTCATTATTATTCTAAAAAAAAGAAGAATTATAAGAAAATCAAAAAGAATTATTCCTTA  
GAAGTTACATGTATTTATATTTTTTTAAATTTTATTTTATTTATCATTATTATATTGCA

338. >MSTRG.7028.2 Gene=MSTRG.7028

CAAGAACTAGTTAATTAAAGTAATAAATAACGTTACATTATTTGGATCTTAAGGGTGCATT  
AAAAAGTATGTCAGAAAAAGTAGTCAAGTTTAATTAAATTTTCTTAGCTAATAAGTAATAA  
GTACTTTCAAATATTTTAATATTTGAGATAAAATATGATATTTAATAATCACTTGTGTCTTT  
AGTTAAATAAGTGTTTTTACTTAGAAGGCTGTGAGGAAAAATGTTCAATAAAAATATTATAT  
ACATTTCTACAAGTTTAATGTATTATATACAATATATTATTTAATTTTAAATTATATATAGTA  
TTAATGTGTATGCTCAATATAAACTAATACCATACATTCAGTGTTAATATTCTTGTACAAGT  
ATATATAATATACTTGGATAAGTATAATATTCTTTTGCAGTGATTTTTAAGTCACCCCTTAAGT  
ATTCCAATTACTAATAATAATACAATGTGAAAAGTAATTTAAAATTGTTTTTGAAGAATAAC  
AAAAAACAAATTTATTTTTCAAATAATCACAAAAAATTATGAGTTGAGTGAAAAGTTCATT  
GTGATGAAAGCAAGAGCTATTTGTGTTCTCAACTGTCCTACTGATTTTGGATAGTTGATACTT  
CGCGCGAAGAACGATGGCTAATGCGATATTCGTCATTTCTTTTTAATCTCGTTGTATATTCT  
CAAATGAACGAGATATCGTCACTATCCATTGTGCTTCAATCAAACCAAATACTTAAAAAAC  
AAAAAAAAAAAAACGTAAAAAAAAAACGAAGAAAAATTCACTTTATCAAACCTCGTTGAT  
GGTTTTTCTCATTCAATCGTCTGATTAACATAAAATCATTTTTGCCCCGTGATTCCATTATAT  
AATTAAGGAACCATCATCGAGGCTGATGTACACCAGAAGCATATCCGGTGACACATATGA  
CTAGGTTACGAAATAATTAATCTCTCTTCTGCTCCAATAATAATCAAGCTCCGTATATTATT  
CAGCGTGTATTATCTCGTGAAATGGAAAATCTGTAGACTAATCGTAATTAATTATTCGGGAC  
GTTTCTAACTCGTAGCATATATTTTCGAATCAGTCGATTTTTTCCTAGTATATAGTAATTGCT  
ATAACTCGTTTGCCATAACTTAATTTCTTTTGATCTACAGTGACAAGGAGCCACATTTCTAA  
AGGGATCAGAACGAATAAAAATAGGAGTTCCATTAGCTTCTTAAAGGTCAAATTGTTTTAC  
AAAATTCGATAAAGATATATATAATTTTATCTTAAAGTTTCAAATTCAAATAAAAAGAGAG  
AGAGAGTTAATCTAACTCATGATTATGATTATACTCAATTTTGTATAAAATTTAAAATGAAAA  
ACCAAATTAACCTGAGATAAATGTAATTGAAAGAAAATGAAATGATTCAAGTATGGTCTTT  
AAGGGGTAAAGAATAATGAATATATACAATTTATCCAGAGGCATTCAAATGATATCAACT  
GTTTCATTTAATCCTTTTTCAGATTACTGCTATTATTTATGATCATGTAAAGATGATTGCTGAA  
ACAGAAAAATAAATCAGAATAAAGAATGCAAAAAAAAAAAAAAAAAAGAACTTTATGAATCA  
TAACACTTGAAATTTGTACTCTGAGAATCTTAATCTTAGTTTAAGATTTATAGGTTGAATTAT  
GAGTTTTGATTTATCACAATAATTCTGGTTCTTATATAGAATCAAATATTCAACAAAATGAA  
AAATTATGATCAATACCTCCAGTATCAAATATATTTTATGTAAGTTAGATTTATAAAAATAG  
AATGATATAGGTTATATTACTGAAACCCATAAATTTTAAATAATCTAAAACCTTTGAATGAA  
AATTACAAATTACTACCAACAAATTTTATTTAATTCTTATTTAATTATTGATTCTATAATAAT  
GTGTGTAAAGATGTTTCTGAAACAGAAAAATAAATCAGGATAAAGAAGTAGAAAGAAAA  
GATTGAGAAAAAAAAGAAAATATAAAATAAATCATGGACACTTGGAACAGCCTATACCTC  
TAGAATCTCAAGCTCCTTCAAATTTGTAGATTATATACTTCACGAATTTTGATTTTTGACCA  
GGATTTCTACGAAATTATTTAACATTTTATTCTCGAATATTCAATATGATTCGTAGAATTCC  
TGAAAAGTTATAAGATATCTTCAGCTAACGCCAACTATACTACAAATGAAATGGTATAGGT  
TAGGTTATTAATTGAAATTCGTAAATTTTTCAATATTATCCTAAATGAAAATTGGATCATTC  
AACGTTTTTCATTACAAAAATTTACGAACAAGACACAAATTATTCGTCAAATGATCTTTCGTG  
CAGAACAAATCGTTGCATTTTTTTGAACCCTTCGTGTTTCTTTTTTTCACGATTCCATTATTCG

CACGATTCCAGCTATATTCTAGTACGAGCAGTTTGATCAGAAGAAAATATATCGCGTATCG  
 GTCTTTTGTCTCCACAAAGTATAATAAGAAGAGTTATTAATCGTAGATTTTTCTCGATCCC  
 GATTCTCTTCGATATAATCCTCCTTATTTCGTCTCGCAATTTGCCCTCGACGAACGAAATTTAT  
 TGAACAAAGCGAGAACGTTGCACGCGTCAACGTCGATAGAAAACGCGATCGTATCGTTG  
 TGGCGTAGAGCAATCTGTTAGTGCAGGGGCCTTATCCTAACTGCGCGGGTTCTGATTGGTTG  
 TTATCGCGGTACCATGTGACCATTACCTTGTATCATGGCGATCACTTGTTCGAGTCGAAAC  
 TAACGCAAAACATTTTCACTGATTG

339. >MSTRG.7029.1 Gene=MSTRG.7029

ATTATTCTAAGAATATATCTTCTTCAAGCATATTAGAAATGCTTGATAAGATATTTTAATTGA  
 GGAGGTAAGATTAATTATTCTTGGATCTTGTGTTGTAGATATATTTGTACGGATAGATAGATTT  
 CCTTTCTTTTCTAATGTTTTATGCGGAAAGAGAGTGATAGATTTTTGTGCAAAAGTGAGTA  
 GGATTTGTACGTAAATAGTGGCTTCGACAGGGAAAGACAGGAAAAATCGGCATCGAGCGA  
 GGAAGAGATTTGGTTGGATTGCGACTTATAAAATGTTCTTTGGAAGAATTTTGTAGATT  
 TTTCTCTAATGCTCGATTATATTCTTCTTAAATGCTTTGTTGGTAGAGAAAAATTTATAGAAA  
 TTTTATTAATCCTGTTACATTTTACATAATATTTTTTTTTTTAATTCAATTAATTAATAGATT  
 TTAGAAAAGCATCTGTCTGTTAATAATTATCAGAATTAATTTAATATCAATAATATTTGTGC  
 CAAACCAATATAATTATCTTTATATCTAGTCTTCCTTACAATTTATATTATTATATATAATTTT  
 ATCACAGAATAAAATAAATTATTATTGGATTGCATTAATTGGATCATTGTAATCTCTTTAAA  
 ATAAAATTAATAAATTAATATTAATAAATAAATAAATAAATTTCTTCCAAGTAAATAATTATA  
 AAATTACAAAAGTAAAGAGATACAATTTTATGTAAATATCTTACAGGAACCTTCGAAAGAA  
 CATTTTCATCAATTGCAATCGATCAAAAAAAAAAATAAAGAATTTTATCGAATCATACGTAAA  
 TTAAGAAAGCCCCAAAAATGGGTCTTGAAGGACAGGGATTATATAAAAAAAAAAAAAAAAAA  
 TATACGATGGTACGATCTTCTACCGTTGGGATCTTTAATTGTTTGCATCGATGTTACGATCC  
 ATTTTCGAAAGATCGTCTCGTCTAATGGAGATAACGGGGTAAACGCGCTTCCGTTACACGAA  
 CCAAGCAAGTTGATACACCTCCTCCCATTATGTGATTTTTACCACCTGTCTTCTTTTATGTT  
 TACGCTCGTCTTCTCGATAGTTGCACATTGAATTCACAACATTGACGAATTTCCACCAGCG  
 TTGCTCGTTGATCCATGATCCCATAAAAAGGGGAAATGTAATTTGAAATGAACTAAAAAAAA  
 AAAAAAAAAAGAAAAAAGAAAAAAGAGTCTGACTAATAATTATAAATAATTGTTCTCTA  
 GAAATTGCTTCATCGTATCTCATTGCATATCAATTTTTTAGGGGAAAAAAAAAAAAAAAAA  
 AGAAAAAATACGACAGTTTTTCGTATATCACTACAAGCAGCTGCACCTCTTTTTTGATTCTCA  
 CACACGCACTCACACACGATCTTGAATCAAACATTCTTTTTTAGCGGTCAGAGAGAGGGAT  
 CGCGGATTTACCACCATTCTGAATAAAGATTTAATGTTTGTAAAGGGCAATAACGATTGTAAA  
 TTTTTCGAGTACACTGTATTTGAATGTGTAAGTTGCATAAAAAAGACAGATTTTTTAGATATT  
 GCACTATAATATTTATTATTCTAAGGTAACGGAGACGGTCGCGATTTCGCCGCGCTCGCGAT  
 AGCTCGCCCCGCCCCCCCCCGCCCCCTCCCCCTCCCCGACCCTCAACCTTCTTATGGCCTC  
 GATCGCATCGAGAATCGATGCCCCGGGATCAATAGCGACGAATTATCGATCGCTTCCGCGCG  
 AAAATGTTTCCGTGCGAGATATGGTAATTTCTTCAGTCGCGATCGACGCCTAGTCGCAAGC  
 GCGGCTGAAATTCGCGACGATCATAAATTAATATTAATTAATAAAGAGACAAAGCGAATG  
 CATTGTTCTTTCCAATAAAAGAAGAAGCAAGATTTTTAGTGTTTACACTACAATTGATAAAC  
 GATTCTATTATTACATAATAT

340. >MSTRG.7037.1 Gene=MSTRG.7037

TCCGTCTCTGTCGTAGCGACACTGCGGGTACACGATGTGATAGTATTTTTTCGAAAAATGTGT  
CGATCTTTTCGCGCACTCATGCATCCGCTTTTTTCACGTGAGCCAGCCGCGATCGCCGTGTGCT  
TTATCTTGTGCTTGCCATCGCTGTTGGCGTGTGAATAATGGGCCAGTCGTGAGTAACACCG  
GACACAGCGGTAAGTCTTGCAATTTTGTCTTTGAAACTAAAACGCCATCTAGTCATTTTTTC  
TATGAGGATGTAAGGGATG

341. >MSTRG.7097.1 Gene=MSTRG.7097

AAAAAAAAAAAAAAAAAAGAACGAAAATCCAAAGAATCGACGATTTATAAAGAGTGCTATA  
ATGTTTCGAGAAAAAAGAAAAAATTCCTCCAGAGTCGAAACAAGGTTGAAA  
CACTCTGTCTGTCTGTCTGTCTGTCTGTCTGGCGACGAGAGCGCGAGCACCGATGCCC  
AAGAACGCTTCGTTCCGGCGAAAGGATTGGAGCGTGTAATAACAATACTTTTTCTAAGTGGC  
CAGGGTTTCGACATCCGCAATAAAACATTTACGTAAATGTATATTCGTGAACACGTTACGA  
TGTATCTACCTAAAGGCCATGCCTGTTGTGCGTTTCCGTGTGCGAGTTGTTGCCCCCTTTACA  
AATTGTACAAAGTGTTTCCTTTCCATCAAGTGCGCGCGCCGCCGATCGCGGAAGTCGAA  
AACAGGAGGAGAATCGGAACTCGACACAGGTTCCGCCGCGTTCAAGCTCAATGCGAAAC  
TAAAGACACATGTTTTGGGTGTAAATCAACGCGGATACGGTTGGATCGGCCTCGCTTTATG  
GCTACATTTTCTCGTAACTTTTCAGATGCGATCATTTCGAATTGCGTTCGTACGATATAAAAT  
ATAATATCGTACGTAGTTTCGACGAATTCGTGAAAATTGCATTAGTAAAAAAGTAGATAA  
AGGATCATCGTGATCCAACGATTTTCTCTTCGAGTGAACCTATTGGGTTGGTGGAGTAA

342. >MSTRG.7194.2 Gene=MSTRG.7194

ATAAAATGTACAAACGGCATAACTCGGAATTTCTCGGGCTAACCTCGGAGATGCATTTAAT  
AAGTGATATAACTGTACGAATCTTAGAGAAGTTTTATCGAGTAGCTTAGTTGTGCGCATTATT  
CAGAGATGTCTGTGCCTTGAGAAACGGACTGACGGACAGACAGACGCTCTGTCAAGTTTT  
TGTGATTCCCGACAAAATGTTGCTGTTTGTAATAATTCGGGAACTCTCCGGAATGTATTTTATT  
TTTTATAGTGCTAACATTCTATCGGGTGCGTGATTGTTTTTAAGAAAAGAAACGAATATATA  
AAAACGTGGTGGTGTGTCAAAGATCCTGGAAAATCCTAGGGTCCCGAAAACGAAGTTGG  
AATTTTCTTTACTTCTAAAACTTTTGCCAACACGCCCTAAAAAGGTCGGATTAATGGCAT  
TAGAAAACATGGAGTAATTTTAAATCAAGAAATAAAATCGGAATTCTTAGAAAAA  
AAAAAAGAAAGAAAGGTATTGTTTTAGTTCTATTGGTTGAGCACAGTTGTTGATCCCTGCC  
TTATATGCTTGAAATATGAGGTTAGGCTTGATCTTGATTTGTAGAAACGTGTATTGGAGT  
AACCCTTGCGAGAAAATTGTAGACATCTGGCGGTGGCGGGCCGAATTACCGCCGGTCGCT  
GGATCCACACACGTCCGGGGACGTGACAGTGGAGATGTTTTCGTCGCCGGCGTCAGTGGTA  
GGCGAGCCGTCAGGCTACGACTTTCAGAAAGAAGAGAACATCGCCAAGTGGAAGGGAGT  
ATTTGTCAACTCCCTACGCAAGGTTCCACCAAGCTTGTTGTGTCCCAAGAGCGTAACAATA  
ATATTCGATCCTGGGATTCATCTAAATGTTATGTTTCATATACGTCATACGAAATAAATATTT  
TGGAATTAACCACTGC

343. >MSTRG.7208.1 Gene=MSTRG.7208

AAGAAGTTTCATCGATATGAAAATATCAAGATGATTATTTACATATTATTGTTACGAGCGAA  
TTATTTTCGATTATGGATTATTTAATTATTTGACATTTATTTGACATTTATCCAATATTAATTTT  
CCTCTAAAAAATTTTCTTCTAAAAATAATATATAATAAAAATTTAATTCGATATTAGATAC  
TAAGTTTGATTTAAACGATACGCCGAATGGAATCTTTGCAGGCCCTACATATAGCTTAGAA

TCCGCAGGAGGCATATCAAAAATAATTTTTTCCAAATATTAATTAATATCGATTATTAAT  
TTCTAAAAGTAAAATGTTTCGCTCGAACAATAGTATGTGAATGATCATAAGTTGACAAAAA  
ATATCAGTAGATACAGAAATAAAGAAAATAGTAACGTTAGCATAGATGCACTTATCCAGT  
GAGACAGGAGTTTAGATCCCAAGATTAAAGACTGAATCGAAGGGAAAAAGTAGAAAAAT  
AAACAAACGTATTTGTTATGATGTTAATTATAGCAATACATTCTTAATTTTCTATTTCATTTT  
ATTTATCGACAATAGTATATATTTATTTATTAATTAATAAAAAAAAAAAAAATTTGATATAATTAA  
TCTGATATATTGATAATTTAATATATGATTATAATTATAAATTTCTTCTTAATTGTATTAATTT  
CTATATATTGATACTAGCACTAGTGATAAAGAACACCGGGACTCCTGACTCAGTGTAGTGA  
AACATATCCTTTTTAGGTGATCGTAGAACGATGAAATGGGTTAGTCACTTGCGCATATTCGC  
GTTGAAGGCACCCAAAGAACCATGTCTGAGACATATCTCTGATGGCCGTAAGTTTTAGTCTC  
GCCGGCTGCGTTGTTATTACTAATTATTATAAGCGGTATTTTTGTACAGTGTCTTACAAT  
GATCGAGTCGTTGCAAGCGCAGCCGACGAGCCATTACGGCATAGCCATATTATACATAAT  
ATAAATATATATACACATATTTATTTCAATTATATATAGCGCGTAATACTCTGATAATCTCTC  
TCTTTAACGTACACGTAATACATACAGAGATGCGTATACACGTATAATATTAATAAATAAA  
ATTAAAGAGACATTAATAATTTAACGAAACCAAAAAAAAAAAAAAAAAAGAAAAAAAAAG  
AAGAAAAAAAAATGAACGAACAAGTAAAGCGTATAAAGAATATAAATAAGTCAAAAAAT  
CCTCTTTACACCTGAAAGACCGAGCTATGCTCTATTTCCCAAATCTCTTTGTCTCTGTTTGTT  
TTACTGTGGATATTTCCGGTGGATATCTTCGCTCTAATATATCTCGGTGCTCTCTCGATACTGT  
CCGCTTCGTTACTTATCATACGACTCGTTTGAAGAGACTCATTTTCTCACTTTAGAATTATTG  
CATACTGCTGATTATAACACATATACAAACATAGACACGTTTATTACACGAGCATGCAAGC  
ATATAATTTTACAAGCATAGGATACACGTATAATAGATTCTATGGATATTATTACTATATAT  
ATATATGTATATGTTATTTCTTTTTTGATTAAGATATAAGTAATTAATCTGTAATAAGGAACA  
CATAAAGATTGTCTGAAATAGGAACAAGTATTGGTACACATGCGTGCATTTATCACAAAAA  
AAAAATACATACATGTACACACGCACACGGGAAATCCATGCCTAATAAAATGACATATCG  
GTGTTATAACGTATAAATATAAATATGAATATAAATATATAAATATAAATATTATATAAAA  
CATAGATACACATGAAATTCGTCTGTATATGTCTATAAATATTGTTACATATATATATGTAT  
ATATATATAATATATATATATATATATATATATATATATATATTTATATATATGGTCATTATAATGA  
TAATGATTACGTGATATGTATTATGAAACATCTTTTTCTCGCAACCAGTCCGCGGTACGGGC  
ATCTACTCAGATTCTAATGTCTATATGTCATTGTTTATTATGTCGTTAATAATTAACGTGTAT  
ATGTGAAACTTTCAAACGAATAAAAAGTACCTAAGCATA

344. >MSTRG.7264.1 Gene=MSTRG.7264

TTTCTATTTTTTATTCTATTATTTAAAAAAATTGAATATTATTTAATAAAATATTGCTTTTCCC  
GCGCGATTAGAGTAGAAGAAAAGTTATGCGACATCAGCCAATCAGAAAAGTCTTGATG  
TGCTATTACGCGGGAAGTCATTCTACTGTGCGAAATCATGGCGATAGAATGTGTCATCCCG  
CTGAGGTGTATGACTTCGATTATCAACGTCGTATTTTCATTCTAACTTTTCCAGTTTATAGA  
TTATTATATTGTATAATTGATCGTGAAGATGAGAAAAAGAAAAAGTCTGAGAGGGACAAAG  
GCATTTTGAACGATATTCAACGAATTCGATAATTTTTCATGCAGAGCTGCCAACTTCTAATA  
AAGACGTATGTACACGTTGGCATTATTTTTTAATTAGATTAGTAAGAAATATTATATATAAT  
TGACATACATACATATATTGTACGAATGATTCAATTTTAGAAATAACTTTTATATTTTCGTAA  
ATATTTTGTAAAGATTGTAATATCGTCATTTCGAGTTTCATTGTTGATTGTTATTTTCATGAAATT  
GTAAACACAGGTGCGTTTAGTTTTCGAAGAAAAGTTGATGTATGTATGTATTGATGTATTCA  
TGATAGAATATATCTAGAAAAAGAAACGAATATTAGAAGAAAAAGAAAAAAATACGAA



ACAAATGTTTTACTTTTCTTTTAATTTTTCTTCTTCTTTTACTAATACAATTTTATTTCCACAGC  
 ATTGTTGTGATCATGTGCAATGCGACCATTAAAATCAGTGTTTGTGCGTAATAATATTTTAA  
 ATATTTTTTGAAATATAACTTTTGTATTAATTATACGTTCAATTATAATAGTAAAAATTAATA  
 GCACGCGAAATTAGAGTCAGTGATTGTTTCGTTAAACATAATTTCGAACGCGTTAATAGTCTTT  
 TATTTATTCATTTCTTTTTTCTTTTAAAAATATTCGTTTTTCGGTAATAGAGTCAGTGTTTTCAAG  
 AGAATTCAGAAATCATGCCTTCGGAAATCAAAAATTTTTCTATAACATTTGGTGGTTACTAG  
 TAACGTTGATGATAGGAGCATCTATAATAATATTCTCCGCATCTAATGATTATCGATCGTGA  
 TCGACGAATGAGAAACGAGGCGTAAAAAGAAAGAAAGAAAGAAAGGAAGAGGAAGACG  
 AGAATTGGACGATCGACGCATTCACCCCGGATCGGATAAGTTCTCGTAACGCGAACAGTGA  
 CGGAATGGGTGTTACTTTTGCACCGACGTATATCACCGACGCGACGTTAATTGCGAGGCCC  
 CCGATTGTCTCGTTTAAATGAGCGCATCCTTTTCGCGCTCAGAAATGTGCACCAATTACGATTG  
 TCTTCGGCAAACCTTCGCGGTAAACTCGATTTCAGAAAGATTTATCTTTAATTAGTTTCGATT  
 AAAGCGGAAACGGTGAAATCTAATAGAAGATAGAAAGCTCTTGCCTTTAGATTTAAACTA  
 CGTTACAAATATCGCATCTCATCGAGGATATCATTCTCCAATTATCTTCTCTTATCGTGG  
 TTTATCAACTCGTATATTCTCTTCGTTTCTTTCCAATCAAACATCGTATCTCGTCATTTCGACTT  
 TCGTCATTAACAACACGATTTAATAAAGATTATTATTTCAAAAGCGATCACGATGAAAAAT  
 ATTTGTATAGGCGAAAATTAAGCTGCTAAATTTCTCGATCCCGAAATAACACCGTTCCAAG  
 GATCCTCACAAATTTTCCTTTATACTTTAGAAGCGATCCCCAAATTTACGGATACTTTACG  
 CTTTCGAAGAGGGATTCTAACCTCTCCCTCTCTCGTGGGCGTCACGCTGTCTCGGTAATTTA  
 GCCTTTAATAGCGGATTAGCGCGCGATATATATATATATATATATATATATATTTTATTCGAACCTG  
 GCGTGCCTCGAATGATTTACGCTCGCCTCGAACGATTTCGCGCCAGGAGTTATACTGGATAC  
 GTATAGATGTGTTTGTACGTCTTCCGTGGCTTTTCGTTCCACGGAACGTAATAATCATCATCC  
 CGGAAACGGATACCCGTTTCGAATTCTCGATCATCGTCAACTCCTAGGATCGTGAAACGATC  
 TTTCTCTCTCTCTCTCTCTCTTCTGCTTTTCGAAAACCTCTTAACCTGCAAATTTACCTGGAAC  
 TCGAACTAGGTACCTCCACGATACCGGTACTGTCAATTTACCATAACTTATTCTCACGCGCGC  
 GTGCAAAAAGTGAGAGAAAGGGCGAGGAGGAGAGAAGAAGTGTTGGCCTCGAGGGAGCG  
 AGGAAGGAAGCATTGGGCAAATTACGGCAGCGCGAAAGGGGAAACGAAATGAAAACGGA  
 CTCCCAGGGGGCGAAACGAGCTCTCCGCAGCCCATCACCAACCTCGCCGATGATTTTCACGC  
 CGATGATCACATTTCTGCCTCGGCGAATCTCGCGTGTTTTTTCGCGAATCGTCTCGTTCTTTT  
 CTTCTCTCGCGACTGATCTATCGATTTCCATTCCGTTTCGGTGGCAGCGTTTAGTTTCGAAAG  
 AGAGAAAGAAAAAAGAAGAAGAAAATAATCATTTTTTCAGCGAGGTTGCACGAAAATCG  
 CGATGGTAATACGAAAAGCTCGTGAGAAACGGTCGTACGTTAAACGATAAATCCGTGCGA  
 TAGAGGGAGATAGAGGGGGGGATACCGTTGGAGAGTTTTTCGCCGGCCGGAACACGTGTTT  
 GCGCGAGCGCAATAACGCCGATCACGTATACGTGGCGCATATTAATCGCCTTGGTACGTGC  
 GAGTTGCTCATCGGCCACGCTCGCGATGCTGTATACGTAATAGAGAAGAGAAGAGGAGCTT  
 ATTACGAGTTAACGCCGTGGCGGCGTTACGTAAGAGAGCGAGGCGTACGATCGTTGAGATT  
 TCGTCGCACGAAACAGGGTGTAATAATCTTAATGGAACAGGTAAAATTTAGATTTTTTGT  
 TTCTTTCTTTTCAAAAACGTT

345. >MSTRG.7265.4 Gene=MSTRG.7265

CGAGGATCGAGAACCAACCGACAACCTCAGGAAGGCAGTGCACGCCCCGACTGCCGACACG  
 AGCGGATGGCGTACGTTGTCGTTTCGCGCCACGATTACCTCGTGATTTTTCTTTCTGTCAGATA  
 CGGTCACCGTCATCGATCTTGTGACGAGTCGCACAGTATTTTCAGTCATCTATTGCGACTTC

ACACAGTCGGAGACTTCAGGTTTGTAGTGACATTGCGTGCCGCGTTCGATCGCGAGATAG  
AAAGAACAAGAAAAATAATAAAAGGAAATAAAGAAACAGAGAAGACGAAAGATATTTGT  
TTTCCTTCGATATTCGTTTCTATCGGATTTTCATCATCGTTTTGTGTTTGTGCATCTACGGACATA  
TCGCATACCGCGCACGTAACCTTTTAACCACGTGTGTGCGCACGCACGCACGATTTCAACG  
ACGCACTTACACGTTATCAGGTCTGGGCGCTGGCGTATGGGGCGCCCTCCAAAAGTCGCGC  
ATGCAACCCTACCGGAGCCCGCTGACGTTGGTTACCATAGTAGCGCGCGTGCCGATCAGCT  
GATCGTTGGGATCCGAGCGTGTTTCGACCGTCGGCAGTCGGCCAGCAGCGGCTCCGTCCATT  
CGTTTTATGCGTTATCTTCCCAAACGTTTCGCGCAACTTGATCGCCTTTCGCGTCGTGATTTAG  
TGATGAAAATAACTAACTATTTTCGCGAACATCTGACAACGCAGATTCCGAAGAAAAATTA  
AGAAATGAAACGAATTGAATAGAAAATTTATTTTACTCACCGCTCGTATTATCCACCTATTT  
GTTTTTATCGATGTTCTGAAGGATACATCGTTACAGTTTATTACTCGATCGATCGATACATGTT  
CAGATGATGGAGTCAAACACGATTTTCGGATAAATAAGTGTCGAACAAAGTGTATTATTTCA  
ATAATCCATGGTACGTGTATATTTGTGATAAAAAAAAAAAAAAAAAATCAATAGCATTTTTG  
TTAATCATCGTGCACAGATTGAGATCGAGACACATTATAATATATGATTATTAAGATTTTGT  
GATTTACATCACGTATTTTAAATACAACCGTCCAAATATGAAATTTAATGGAAATATATGG  
ATAGTGGATTTAAATATTTACTATCATGCTCTTTTGTGTAAGTATCTCGAATGAAATATCG  
AACCATTTTTGTGTCAAATACACTTACGAGATAAATTATATTGAACGCAAAAAGCAATATT  
ATTAATGATAAATAAAAGAGATGGTGGATAAATAATATAATAATATATACAATTTTTTCGAA  
ACAGCATTTTAATAATAACCATCGGATGATTTTACGAATATGATTGACATTTGGTGATCATT  
TATGACATGGTACAAAATAAACGAAGCAAACCTTACGAAAAAACGATCACTCGTTGAAATA  
AATATATTACAAAATTATAAAGAATATTTTATATTCATTGTTTATTGTATCAATTAATTTGCA  
AACGAAACAAAATTTGATTGCTCAAATTAATCGATTATATCTTGGAATACACTTGCACTGT  
GAAGATGGAACATAATCGTTCCAAATCGATTGATCAAAAGATGATGTCATAGCGTGTCTTC  
GAAAAAATATCGATATATCGATATTGTTTCGTGTCAGATGTCGCTAGACTATCGCGATGGCC  
GCGGAATCTTCGTCAGTACGAAATCGCGACAAAAGAACGAATTGTGAATTAATAATAGT  
GATCGTAGTGATTGATAGTTTTTGTGGAATAAAATTCGGACTTGTTTGGTAACGGGTATC  
GCAGGATGTGAATGTTTCTTTGTTACGAACATATTTTGACAATCGTTTGTACCTGTGACGAAT  
CAATCGTGTGTACCTTGACTGCATTAATCAGACTTTTTGTGAATATGTGAAGTGACTGAGCT  
TTTTTTTCCGTGCAACATTCGTCAAAAGTGATTTTTATTTTGTGTTGGCGTGATCGCAATTACAT  
TATTATGTACCGATCGCAACAATGACAGTTCGAGATATTTTCTCGTTCATACGGAAATTCTG  
TGATAGCCAATGCCAGCAACGCCATTACTTGATTAAAGTGTGAGGAGAACGCCGTTCCCTGA  
AATCATCTTGATAGAAAGCTTGGTGACGTACGCCGAACGGGCCAGTATTCATGCCAGTATG  
CCAATCAGATGCCAGTAGAGAGCCAGTATCTGTATCTCGTCGCCACCGATAGCCAATTAAT  
AAGTTACTTAGATAGTTAAATTAATAGGCAATACAAAAGGGAAAAAAAAAAAAAAAAAGA  
AAAAGGAAAAAAAAAACGTCAACGTTTTTTTTGAATAATTGTCGTTTCAGAAGGCGTCGTTCA  
ATAAGCGTGACGGATATATATATATATATATATATATATATATATATATTACGTGTATTC  
AATCATACACGTAGTCTACGTATATCGATATATATAAATATAATTAACGTAAAAAAAAATA  
TATATATACAAATATATAATATATATATATAATACAATCGAGAGAAGCGATAAGTGTCCG  
GAATCGTGCGAGCAATTATTTTCGCATCGTACTTTTTCTCTCTCTCTCTCCCTCCCTCCATCC  
TCTCCCTCTCTCTCTCGACCATATTTTTCTCCGCTCGGTTGATCGGTTTTCTTTCTTTCTTTCTT  
CTTTTTTTTTTTTTTTGAATTTATATCGGTGACCGCGTATATGATTCCCCGCGGAGAGTATATC  
GACAAGATTGGACAGAGAGTGGAATCGAGTTGTGATTATCGAAGTGGACCGACCGATCGA  
TTTCTCGGCTGTGAAGTGAATTAATATCCCAGGAAAAAGGATTGAAAACGGAGAAAGGAA



CGAGAAACGCAGCAACGATGCCACGAGCCTGCTTCGTGTTCCAGTACGGTTCGTAAGGAA  
GGAAGGAAGGAAGGACACGAGTGTGGGATCAGGACGCTGGTGACACGGGTCCCGGGTGT  
CCATCAACATTCCCGCTTGTGCTCGCTCGTGTCAAATTATCGCGGACAGTGATATTGTGTG  
CGACGAATTCCGAAATAGTCGAGGATCGAGGATCGAGACCCGGAATCTCAACATATACGC  
TCAACTATGAATCCTGGAGCGTGATGGACAAGCTCGAGTACGCGACCACGACCAACTTGC  
GGCTACGCCTCGCCGGCATGCTCATGGATATGTGGATATTCTTCCTGTTTCGTCGCCATTGCC  
GGTGAGTGTA AAAACAATCCTCTTTTCTTATCTCTCGTTTTCGCTCGCGTTACGTTACGTTTCGA  
TTCGATTTCGACGCAATTTTCAGATTCTCGACCCCCTTGTGCGTGCGTGTATGCGTGCGTGCGT  
GTGTTCCCGATCGTGTGTATCGATTTCGACGAGTGGCTCGCAGCGTGACTTGGTCCGCGTGCT  
GTCACCTCGACGTGTCAATACGCATTACGTATGCACAACAGGCACGTGCGGCACGCTGAGTA  
AGTGCGTCGTATCTGTGCCATGGTTGAGACTCGATTCAATTCAAGAGATCGGAGAGAGGGAG  
AATCGATGCCACTTTCGTTCTTAAACCGGTGAGCCACGGATATTCCGTTTTTGGACCGATT  
AAGGCTCCGATTTCGAGCCGAGCGGGGGGGCGGAGGGAGAGGGATCGAGGCAGAGAAGCA  
TGCCGCGTTAAAAAAAATACGAGAAAAATATATTTTATGCACGTTGGGGACAAGAAGAAC  
CGGTATTACGCGTCTTTGTACAATTTAACGTACACAATTTCTCCTTTGTGTTTATCTCTGTTA  
TATACGCGATTATATACACGCCTGAAGTTTTTGTGTTTTGTTACTATCTGCGACCTCGTGGGG  
AGCCGTAAGCGCTTCGCCCCGTACGACGCAACATTGTGCAACAGTCGATAGAACGAGCCAG  
ATGGTTGAAATTCTTACCGATGGGCGAGGGGATTCGGGGAACCTCAGCCTCTTTATCTTGTC  
GTTTTCTCTTTATCCTTTTCTTTCTTCTTATTCCCTCGATCCATCAGTCTCCTCGCTGCGTACT  
ACCTTTCGTTTCGACACGTTTCAGGGGAATCCTCTTTTTCCACGTCTCTCTCCCTCTCTCTCT  
CTCTCTCTCTCTCTCTCTATCTCGATTAGTTCGTCTTCTCCCTCGTCGACTCTACTTCGAC  
TCTTTCTTTCTCGCAGCCGGTTTTACTCCGTAATCCGCCCTTCTCGTCCCCTTCTCGTCTCGAC  
TCCTTCCCAGAGTCCGTATCTCTACGCTTCTCCCGTTCCACCCCGATATACGTATGTATGTA  
TGTATGTATGTACCTCTTCTATTTCCACGGCAGGGCACCTCGATGCAACCGTGCGTGAGGA  
ACGGCGGAAACCGGGGGGATAACTATCGGCGACTGTGCTCGTCGAATCTCATTTACGATCG  
TGACGATCCGAGGAGAGGATCGTAAAACCGCTCCTCACGTA CTGATACCCACTTTACCTT  
GGAGCGTCGCGCCGGTTCGTGTAATTGCTTCGTGCCTCGACCATCGAAATTCTATCGCGATC  
CTCGATTTCGAAAACGTCTCCTCCATCGAATCGTCTCCTCGTCTCGCTTTCTCTTCTCTCTC  
TCTCTCTCGCTCGTTCGCTCTGTATCCGTAAATGGAAGGGACCCAACTTTTCTGTGTTTGCGC  
CGAAGCCAGGCGTCGGCTAAAAGCTCTCTCTTTGATACCACCTGCGTCTGATTTAGAGAATT  
TCACGAGGGGCAAAAAAAAAAAGAAAAAATCTGTCTGGGATGAAAACCTCGGTTCGGGC  
AACAGCTTCGATGGAGATTTGCTTTATACACGGGTAGAGGGGAGGGTATATGTTTCGCGA  
TAGTTGGGGCAGAAAAAATACGGGAATACGATATTTTGACGTATGCCGCGGATCTTTTC  
AATGCGCGAAAGGTACACATCTCGTATCATCATCTCGTCCGTCGTTCCCTGTTTTCCACGAAC  
GAATTAAGGGAAAATATGCCGCGTCGAGTGAAAATTAAGCTTTTCAGAAATTGCATCGTT  
CGGCTCGCGTTCGTTGCATCGAGGTACAAACAGGAGTCCTTTTTTTTAGGGGAATCGATCGA  
GGCTCGCGAAATCATCGAGCAGCGATCTCGAATACGCGTTTTCTCCCCCTCCTCTTCATTG  
GGACGATGTGCAACTCGTTAAAGTGTCGTTCAAGCTCATTTTCAACGTTGAAAACAAGCT  
CGACGCGAAGCGTTAAGCGAAATGGTTAATTTGCTTGCTCTTTCCCTCCCCGATAGTTAGG  
CGAGAGAGGAAATATCGCGATTCTTTCAATGGTTTCTCTCGTTACATGAATCACGTCCTC  
ACAGATAAGCTTCCGTTTCGTCTTGTTCATAGATATTAGTTTTCATTCATCGAAACGTTCTC  
GTAACGAATCAATTGCATCGGACTCGATGCCGTAATTTCTGCCTCTTGCTCGAGTCAGTCTCA  
AGATCGTATCGTGCAATTATTCATCGTTCAACTAGTATTTAATTGCATTTTATCCGCGTTTATT

ATTTCTTACCCCTGTACACGCGCGTCCACACAGGTATTCATCTTCCTTCCGTCGTTTCATATCC  
GTTTCATTCAATTCGATTGAAAACCTTGGCGACAATATGCCATATTTGTTCCGTTTTATCTTC  
GAAGATTAATCCCATCTAATCGAATCATTGCAATTGCTTAATCCTTGTTTCGAATCTTTTTTC  
TCCTCGTCTTTTTCTTCTCTCGCTTATTTTTGAAAAAATGCGTTATATCTTGGAACATCTCCGC  
TTGTTTCAGGCCAATTCTTTCCGTTTCATTATACGTACGAGCAATACTTCATACTTGACTCGC  
TCACGACCCAGGAATTCTCATTACCTTTCCGTGGCAGCAGCACATTCATCAGGTGTCAAATA  
AAATTCTCGCGAGCCTTCCTTACTTAAACTTTAACAAAGATCTACTCGTAGGTACAGGTGGT  
GCGGGCGACGCTATCCCCGGTTCAGATGAATTAAGGAACGTCCTTCTCGTCGTCGGGGCAC  
GGCGATAAACCGTTATCTTTGTTTCAACCCGTCCACCACCTCGCCCAATCGTCTTCAACTTTC  
ACTTGTGAGACTGAAGTTCGCGACGCTTGCCATCCCTTCGATTGCTCTCCCGATAGTTTGC  
CTCCAACCTTTGAATAAATAATTGATACTCCTCCTCTCTTTTTTGCAGAATTCGCGCGCGTC  
CAATCCTTTCTTTCAAATTTCTCCGTTTCGAGGATGAGAGAATCAGCGTGAAAAAAGGGG  
AGAGCTCGATCGACCGTTGCCTGGTCAGGGTCCCTCTTAAAAATTCGCGATACGCGATAG  
GTCGTCCCAGCGAGCGAAGTCGAATTTACGGGGTCTCTGGTGGCAGCTACATCGACCGGTT  
GTAACGAACTAGAATGAACGAAGGGGGGAAAAAAGAGGTGGGTGCGTAGGTAGATAG  
GTATGGATTGGTATAGGCAAGGCGAGCCAAGGGCTCCTGGCAAACCTGAGCGGAAACGGGA  
GACGACGACCATCGTGACGACCTCTCATCTGGAACCTTCGTATCTTCGTTTACAACGAGAAG  
CAGGTGTTCAAGAAGCGCGTTATCCTCGTGCGTTTTCTTTTAATTTCTTCCTTTTTTCTTTCA  
TACCGCAACTTTTTTTAACAGCTGTTTCGAAACTCGACCCGAGATTTACCGATTTTTCTCCA  
CTTTTCTTTTATCCACAGGTTTTTATAAAGAAGGGATAAACGCTCGTTTCGTTATTCGAAGG  
AAGGAAGAGAAGGAATGTTGCGTGCATTGGAGCGAGCCGTTGCCCCACCACGCTTGGA  
CCCTTTTGAATCGGCGGCGGTTTGCTCGGTGAAATCGAGGATATCTGGGCGGACGTGGGAG  
GAAAGAGTCGAAAGTCAAATATAATAGCTAAAGGCTCTCTCTGCCTTTTCCGCTTTATTTGA  
AATCGATCTCTCGGCCACTCGAGATATCCGTATCCGATTGACGAGCGCGAATCCTCCGTTA  
GTAGTCGAACGCTTTTTCTCCTCGTGCTTGTGCTATAAACGTTTCGTGGATTTCACACGGTC  
ATCGCGAGCAAGCTATTCACAAAGCTCCCTCCTCCCTCCCTTATCGACCATCTAAAACACGT  
TTGATCTCGTATCCGCGCCTCCCCTAATCGAATTAACCTCCTGTATCGTGCCCTGCCTCCTGTT  
TACTTTATCGATTCCCATTTTCTCGTATCGCGTGCGAGGACACAGAGACTCTTTCCTCCGGA  
ACGGAAGCACGCGATCGTGATTTTCTGTAACCTTGATGGCAGCCGCGCAAGCGATGATTAA  
TGGAGGAGGAGGAGAAGGAGGAAGGGCAAAGCAGTGCCGATGTTTCGAATAGAAACGTG  
GTCCCGCTCGGAATTCAGAAAGACGAAAGAATGCATTTCCCCGTGTCTGCGATGCGACGGC  
TGTGAAATTGCACCGATGCGCTACGCTTTCGTCCGCATAGAAGAGCACGTACTTCCCCCGC  
GAAATTCTTGTGCGGAGGTATCACGCCTGGCTTCCTGAAGACCCTTTTGAACGTGTTCAATT  
TCGCGGAGAATGTTTGCTTGAAGGCCATGCTGGAGAAGTGGCGGGGCTCGCTCTGCCCGA  
CAAGACCCTTTTCCAGCTCATGCTGGTGGGCAAATTGTTGGACAAGAAAGAGTGCGACTTT  
TACAAATTTCTCGCCATCGCTTGCGGATTCTCGGTAAGGTAAGACGAAGAAGAAGAAGG  
AAAGACACGTATCTCTACTCTATTACTCGAAATACTCGAAATAGGACATCTCCCTCTCCGCC  
TAAGCTCTTTCATCCCCCTCGTTTGCCATCTTTATCATCGCGTCTTAAGTAGGATACTTTTAG  
AAACGGTCGTTAATCGATCTGATATTCCTCTTCCCCCTCGGCTGGGATCCCGTGATTGATG  
AAGCGTTTTTATCGCGCGGGTGTATCGCCTGGCAGGATAGTGTTATTTTTTCTCTCCTTCTT  
TTTGCACCGCGAACGATCAGCGGGGACAGTTCTTCTCGCGCCGAGAAGATCGTTTTATTATT  
ACCGCTTAATACATCATTTCTCCAGCGAGGAGGAAAAAATTCGAGAACGGATGCTCGCT

CTTTGTTCTCCTGGATTTCGCGGAATTTACAACGGCAAGCTTTTTTACAGGGAAAAGAGAA  
ATGGGGGGGAGGAAAAGACATTCTAACCGGTAATTAAATTTTTTCC

349. >MSTRG.7430.1 Gene=MSTRG.7430

TATCGCATCTTATGGTTCGCTCAGTGTTTTATATTCGTTTATGGTAAGGGACGTATATCGTG  
TTAAATATGACTCAGTTAATAAGAAATTCTCTCTTTTATTATTTACGGAAGAGTGTTTAGAT  
GAATATTTTGACGACTTGAATTTTTTTCACGTTGGATGTTTTAAATCGACGCTGAGCAAAGTT  
TTAGGTCTTGGCATTATCAGTGGATCTCTTCTTGTGTATTATTGGATTTATTTGCCATCACTGC  
AATGGTATCTTACAGTTTTATAAGTGGTTTTCCATTTAGTTCATGGGGCGATGGAGTTTTTTT  
AGGGTTACAAACATTAGCAATTGCTGTTTTAGTTATACATTTCAATGGTAATACAACACACG  
CAACGGCATTCTTATCTGTTATTTAGCAATATTACTTGCTATTATCAGTGAATTGACTCCAA  
TTAATTTTCTTTGGACTTGTCAAGCGTTAAATATACCTATTGTATTAATTAGTAAGTTAATCC  
AAGCTTATACAAATTATACTAATGGAAATACAGGTCAATTATCAGCAGCGACAGGTTTCTT  
GTTATCTTTGGATCTCTTGCTAGAAATTTTACTTCTATTGAAGAAACAGGGGATATGACGA  
TGATAATAATGTATATATGTTCCACTACTGCAAATGCTATAATAGTTGCTCA

350. >MSTRG.7454.1 Gene=MSTRG.7454

TGAAAGGTAGCCAAGCTTCGTACGCCAATCTCTGGTTTCTGAAGTCGGTTACCAATGAAGA  
TACGATCATGCAAAATACCGTAAACTCCACCATGACCGTATAATAAATAGTGATCGACCTG  
TCAACCGTTTGATGAAAGCTCGTCATTCAATCATCTATTTTCGTTGCTGATCGAGATGTGTTCA  
GTGCGTTCCGGTGCGTTCGATGCCGGAGAGTCCGCTGGAATTACGGCATTAACTCGAATGAT  
AACTGAGAGTCACCGTAAGAGCGCAAAGGCTTAAAAAATAAATATATAAAAGAAAAATC  
ATCTTCAAAATGGAAGAAGTATATCAAGGCAAGCAGAAGGAAATATTATGCGAATAATTTT  
TTAAAGCTATCGAAAATTTTTATAAAAAAAAATGTAAATAAATGTAAATGTAAATAATATA  
ATGTAATAATATGTAAATAATATATAAAAAATGTAAAAAATATAAAATAAAGACACCAAT

351. >MSTRG.7474.1 Gene=MSTRG.7474

CCCCGTTCTATCTAAATTTAACCAAAATTGCAAAATATTACTATTAATCTGAAATTGCAA  
CCGAACAGAGATCGAATTTTCGACGAGATCGTGGATCGTCGTGCGGTTTCTCAGTGTTGCTG  
GACGAGAGTAGGTCCACTACCAGGATTTCTCCAGGGATCCGGGATGTCGAAATGCGGTGG  
GACTGTTATCAGAGCATCATCCGCGCTTCTATCAGCGCTACAATTATTCGGCTTGACACGGG  
TAGTGTTACACACTCGATCGGTAGCTTGAAAAATTCGAGCGTGTAATTATAACCTTGCGTG  
CTAACTCGGATGATAGTATGCAATGGTACTTCCATGTAAGGCAGCTCCTCTGGTTTCTTATC  
CATGAAGAAACCGATAATGCAACGCAGAATAGCTTGATGGGATACCACTAACACGTTGTC  
AGATCTTTGCAATTCAGCAATTACCGGTTCTACGCGTTGCATCGCATCTATATAACTTTCTCC  
CCATGGATAACGATAGCGCAGCTTGTCTGATCGCGCCATGCAAATTCCTGCGGATAATGC  
TCTTGCATCTCCTCATAAGAAAGACCTTCACAGATACCAGCGTGAGCTCGTTAAGTGCCG  
CTACGTGTTCTTGAGGTGCCTCAACCCACGTGCAGTCGCGATAGTCCTTCGAAGACGACTG  
GTCAATACGCGCAGATCAGGAATTCGCATAGCATTGAATTTGTAGCCAATGCTTGTGCGTA  
TCTTTGCCACGCGTGCTTAATACCGCATCGCCACCGACCTTGCCCAATACATTGAACTCGC  
TTTCACCGTGCCGAGAGAAATAAAGAGTATGCGGTTTGACCGTGACACTTCCAAGATATCC  
AAGTACGCTTGACTCCACATGGCCTGACACCTTGCAAGTCTCGATGTCCATGCTGCCAGTGT  
CGATACGAATTCGAGGATACGTCTTCTCGTCCATCGGCTCGTAAGATTTAATATAATGAGCT

ACCTTGAGCCGTAAATCCTCCTCAGCTCGTACCGGATCCATGCCAGCATAGTCGGCGCTGT  
ATCGTAATATGTCTTTATAATTTCTTTCCAGAACGACTGGATCGTCGCAGACACACTCGATA  
AAAAGGACACGATAACCAAGTTGTCCAGAAAAATAGTCGAAGACCTCGGCGCGCTGCGCT  
CGTGTTACCAATGTGGCGTCCAGGATAGCTACGGAATTCCCGGCTGTGAGCCATGCGGCAC  
AGTCATGCATCGCGTCTCGTTGGGCCAATGCTCTTAATGCTGTATTGCTGTGTGATCAGGG  
CGAAATAGCTCGTGCGACACCGCTTCACCGTATGGTTCCAATCTTTTTCTCCGGTAGTCGCT  
GACGCTCATTATTTTGGTGAATCGCCATTCCAGTTGAGCCTACGCGAAAGACATTGAGCC  
ACTTGGCTTTTTCCACGACCTGGTAAACCACACATCGCTATCACAACCTCTGCGAATTTACG  
CGGGGATTTTATTATCCCTGCGTCCTTATACTGATTTTATCCTTATTAGGTTCTTGGCGTTGT  
TCCTCGGCACTCGGAGCCATGATCTTAGTGCTCAACGAGTTTTCTTCGATCTATTTCGACGT  
ATTGGATGGATTAGCTGCCTGTGGTACAATTGATTTATTGTTCTCTTCCTGAAAAATTCCGGC  
TTGCAGTGCTAATTTTCTTATGGCCAGACAATACCCAAGAATCGGTGCCAACAGATCAAAA  
CAAGTAACAAGCCAGGGCATAACACGATAAAAAATTTAATTAGATTTATTTCTTCTCCCA  
AGATGAAAGCGGCCAGTAAGTAGACAAGAATTAATGATAGTAAAGGTAAATGAAATCCT  
GGCAACACTTTTGTGTGAAATATCCAGCGAGCGAGAGCCCTCTATTTGTATAGAATACTCGT  
AAACAATGGCCTATTGCTAGTTTTCTTTTTATTTCTTCTGCCGTTTTCTTTTAGGCTAAAGTTC  
TTCCGAAAAATGATCGCTGCTTGTGTGCCGATTATGGACAACAAGTCTCCCTCATTCCAA  
TTTGCTTGATCCTCACCTCCGAGCCAGTTTGCCTGCTTCTTTGTCTTTGTTTGAAGAAAAGC  
CCAGTTCTCCGCTTTTTTTTACTTTTCTTAGTAACCCTCTACGTACCTTGATTTATTTAATCGTT  
TTATTGTCAACAATTTTTTGATCACGTTGCTATTTTCGTTGCTTCGTATTGTTACTAGAGAATGT  
GCTCGGCTATGCGCACGCGCTGCCACAAGTATTTGTTAGTAGTTTACATAGTCACGGTGCTG  
TTTACCCTCCTCTTGACGCCGGTGTCCCCTTTTCGTCTCCTCTACCGTCTCCAATTTAGGTAT  
ATTTATATTGTAAAGTATGTCTCACCTTTTGTCTTTCTTTTTCTTTTTCCACCCAAGACAA  
CGTAGTTATATTTGGACACTGGTTAAATCAATTTTGAAATTCGCTTTCTTTTAATTTTATTCAC  
CAAACTTTTGAATATAACTAGTGATATTTAATGTTGTGCAATTTTTTCGATATATTTAATAC  
CGTATGTTGAAATCTGCCTGGTGTCTCACAGTTATGTATATATTGTGATCAGCGAAGAAAG  
TGTTTAAAAATCAAAGTGAAAACGAAATAGAAATGATTTTATGAGACAAGAAAACACTA  
TCTCTATTCAAGACGACGAGGTTTCAATGACTGGTGTTCCTTGACTTGCTGCAGCTTTTAGCA  
ACATCGACCCGGACTCGGTAGGCCCTCTGTTGAACTAACCAATCAGAAATACGTTGACCC  
CTCCACTTTGGTGTGGCAATCATGTTGAGCATATGTCGGATGTATTCACGTTTGCTGACAAA  
ATCTTAATATTTATTATACTAGGATAATTTTGTCAAAGTGATTTTTCCAAATAATTTTTTGA  
AAAAATTAATCAAACTAACAAAAATATGAAGATATTTAGTGGTATTTTTTTTGAATAGCAT  
TGCATTAATAATTGTCTAGAATAAATCAACAACTATTCCATCGAATATGAATCATAACTTTC  
TTCAGTTTCTGATAGAGCCTAAAGATGGCAAATCAATTTTAAATCGATATATGAAGTTGTAC  
TCGTCTGCCATCTCGTGGCGCTACGTAAAAAATATTTATCGTACCGATATAACATGGCGTTC  
ACGTTGTGGGCACTTTTCGAGGTAACCGTGTTATGTTTGAATGCGGTCTGTATTTTGAACGA  
AGAGAGATTTCTTGCAAAAGTTGGCTGGGCATCGTGGCAAAATGTTCAAGGTTTTGGAGAA  
ACTGCTACAGCTAAATCACAAATTTTGAATCTTATTAAATCGATACGAACGGTAGCACGAG  
TTCCATTGATATTTTTAAATATCATAACAATAATTGTGAACTGGTGCTCGGTTGAAAGAAA  
CAATTGATGATGTAAATAAGAGGATAATGCACAGTGAAAAGTCAAAGCGTGATGTACATA  
AATGAACAATTAATTTCTTTATTTTTATCGCTGCATTAATAAGTGAAATGGTTCTAATTATA  
ACACATTCTTAAATATTTTTATAATGCAACTATTTTAAAAATGTAATTCTTTTCATTTCTACA  
AA

352. >MSTRG.7501.2 Gene=MSTRG.7501

CGCGCGGATCCAGACTCAGTTACGCGGCGGCGGCCACCCGTGCGAGAGCGTATCGCTTT  
CTTGCAAACGTGCCGCGCTGTTTTCTTTCTTTCTCTCTCTCTTTATCTCTGTCTCCTC  
GCTATTTCTCTCGTTCAACTTCCTTTCTTTCTTTCTTTCTTAACCGCGATCAACACCGCCGTCA  
CAACACACGAGTCGCGGTGTTATTTCTTTTCGATCCGTGTCTAAGGAAAAAAAAAAGAAAAA  
AAGAAAGAAAGAAAAAGAAAAAGAAAAAGAAAGAGGAAAAGGATTGTGCATCGAGTTC  
TCGTGTGCAAACGGATAATCAAGAGACAGAGCGTGTCAAGTGCGAGGAAATCAGGGTTTA  
CGTACCCTGAAGAAGGAAGGAAGGAAGAAAGGAAGTAAGGAAGGAAGGAAGGAAGGA  
GGAAGGAAGAAAAAGTGGTGTAGCCAAGGACGTTTGTGTTTGAGTTTCGCGTGACCAACG  
GAAGAGAGGGAGATTACTGGCGCGTTTGGAAACACGCGTGGTTCCGCGTGTTACGGGACTCT  
GTGCGTCTCGCGATACGTTCTCCAACGCAATCCAACCCGTCGAATTCGTGATATCATCCCA  
GTAAGAAAAATCTGTTGAGATCTGGTTTCGAGAGGAAAGAGTGCACGCCGTGCCGATGCC  
GAAAGGATCCGTCGACACGATCGACTCACGAACGAATTTACGAGAATTTGGGAGAACGC  
GACGACGTTGATGACAGTGACGACAAGGATGTCACCGTTCGGGGCGGAGGAGCGATAAAT  
TTTGAAGGAACGAGGGAAAGATATAACAGGATTCTGCATGCGAGAAGTGTTTCGAGCTCC  
TCGGTGGAGTGCTGACCTCCGAAGACGTATTCCGGAAGGATTCGTCTAGCCCTACGACAAC  
GCAGACAGGCATCTGGTCGTCGATCAAAATCACGATCGCGATCACGATCAACGAGATCGA  
TCGACGACGATCCATCTACCCACTACGCCGTACCACCCGGTCACCATTGCGGCGGACACCA  
ACAACAATCATGACCATCATCGCAACTTCGAGCATCACGCGGCGCAACAACGCCACGATC  
ACTGGAACAAGTGTAAGTCATCTAGTAAAAAAAAAAGAAAGCGAAAAGCAAAAAAAAAA  
AAAGGAGGGAAAAACGTGAAACAAAGACCTTGAGACAGTCCTGTTTTAACCATTTGTGCAT  
CATTGTAAAAAAAAAATTGTACAATGCTCGCTGATGTCTGGCAGGTTGTGGTTAAAAAAG  
ATGGTGGTGGTGGTGGTGATGGTGGTGGTGACGGTTGGATGATTGACAATGATTATCGATC  
GAGGAGATGGATCGACGTGTTCTATTTTATTTACTTCGCGAAACGATCAATCGTTTCGCTTTA  
TTCCAAGTTTCGTTTGCGTTTTCTCGATTTCGATCGATCTTCGAACTCGTCTTTTCGATTTCGATTT  
TTCTCTTTCCATCGGGGGACGGGGAGGGAGGGAGGATAGTTTCGACGAGAGACCTTTTGAT  
CGAATCGATCGAGAGATCTAAATACAATGGCGTACGTGCAACGAATTCGCGCGCGTGTGTG  
TGCACCGCTGCTGTTTGGGAAACGAAAAAGGTTAATGGGGATGGCATTAAAGACGAAGGA  
ACGAGCGAAACGAGGAGATGAGGTCCGAACGATAGAGCG

353. >MSTRG.7508.1 Gene=MSTRG.7508

TGTTTCTCCGCGTAGAAGGATTTGCCGCACAGGCCGCAGGTCCATTGCGATGGCCTGTGCTG  
ATGTTTCGCCTTTTGCTGGGGCCGAAAAATGTCCCGACTTTCGTGGAACGGACACTCCAGCG  
GCAATTCCACTTGATGTTTCTTCAGGATTGGCATCCATCTCTTCTGCACTATCCTCCTCACCA  
CGGACGCTCGATCGCGAGGGCATGATATTTTAAACACGCTGGGCCCTGGCCACGGGATTAC  
CGATAATAGTAACACTATCAAGACCTCGATATGAAAGGGTTGGGTCTTCATTCATAGCCCA  
AATTCGCCTAGCGACAGTGACCCGGTGGCAACGATAACGGCAACCTCACGGCCCCGACGAG  
CAACACGAAAATCCCGTTCCCGAGTTTCTCGTCGCGATTACGGTCAACTGGGGACGTAA  
CGGGGGTTGCGGCGAGGACCAGGTACAGG

354. >MSTRG.7538.1 Gene=MSTRG.7538



GGATGGGATTATTTATATAAAATATTTACAAAGCAATTATGTCACTTATAACTATATGTAGCC  
AATAAATCGCTGAAGTCGAGTCTTTCGCGCACTTTTGATCGTTATTTCCGGATTATTTCCACG  
TTCACGTCGATATATCGCGAAGAATTTCCGTTTGTTTCATCCTTTTACGATCCTACAAAAAAT  
TCCATAATCGTTATGGAATTACTGCCATAATTTTTTGCACGACAGACAGGGATATCGCGTAT  
TTCGTCGAAAGTGCGCGAGAGACAAAATTTGCATCGCTCAGGCATACTAGAAATCTACGTC  
TTATTGTGCGCTCACAACTTTTTTCGAAACGGCACACTATATAAATAAACGAACGCACGTTT  
TTTTTTTTACTCTCGCTCGAAGGAACGCGAAGGAAGATCATCATTTTGCAGCCATCGATCAA  
TAAATAATCGATTCTCCCTCGACTCCGGAACGTGGTTGCGTCGAAAGAAAAAAGTAATA  
ACAATCGCTTAAACAACAATTGATACTCGCACGCTTGCATCTGGATTCTGCACATTCTGGTC  
TGTCGGATCTTAACAAGTCCTCGAGGCTTGCGGTGTAAGCCGCACGCGGAGTAGCAAAGAG  
ACTACGAAATGGAAGACATGGATTTTGTTCGTTTCGCTTAACAAACGTCTTAAAACATCTC  
CTTTTATTTTCTAATTCCCTTATTTAAATACAGGTGTCGTGTAAGATTATCCATTTACGAT  
AAGAAGAAATCTTACAGAGCTATTACGCGATGATGACGCGACGATGCACGCGTTAGTTGC  
ATCGCGGCCACGTTATAAATATCGTTTTATTGCATAATACACACATCGCACTTTAGCGTCCC  
GTTACACGCCTCGAGTCGGAACAATGCTCGTAATTGTGTATCGCCTTCAGAGTTTCTGGA  
CTGTAAATGCGCTGCGAAGGAAGTGTCTTTCTCTTATCGTGGAGACGGTCGATAGTCCGTT  
ATCCAATGAAACGCGTCTTTGTCTCAAAGAAAAATCCCTCTAATATTGCAGTGCGGTGAAA  
AGCTTTTTCTTGACGTTAAGCTCCCCCATTAAGCGCGTGAACCGGACCTAGCGTCTAG  
AGAAAATCTTAAGCCTAAGAAAGCAATTAAGCCTAAGGAAGCCACGATGATCGTTTAAAA  
AAAAGAAAAAAGAAAAGTTCCAATTCTGAATCTCGCCGTGATCTCTCGTGATCGATGCAAG  
AGAGCATCTTCGGATAAAAGGGGAGCGAATTTCCCGTATATATGTATATATATATCTTATCA  
TCTCCTATATCTTGCGATATGGACAAATATCTAACACGATCGAAATGCACGCCCCTTCTCTC  
GACGAGGATAATAGATTAAAAAAAGAAAAGAAAAGAAAAGAGAAAAGACACGAGAGCG  
AAACAATGCGTTTTTTATCAACTAAATAAGACTAACCTTACTTCTTATTATCGGTACCAATC  
GTCCCGAGACTAATCTACGAGATATGTGAATTTCGTCCATCTCCTCTTCATCCGTCCCGTCGC  
GTCCCTCCTTCACTTCAAGGTATAATGTCGCAATGACAGGCGCTGCCACCCTTACCGTTGTC  
GCACTGGCTGATACACCATAGATCCCAATCCATGGAATCCTCGTCCATGGGCGAATCATT  
GGGCTCAAATTATCGGCGGTGGCGTTCTTCTCCGCGCTCGACGTGTCGATCCCCATTTCTC  
GCTCCTCCCGGAAAGATTCTCCTCGCTGATCCCACGCTGATCCCCGACGGAAGAAGGGAGA  
AGTGGCACGGACCAACGCTCGTCGATCTTCTCGACGCGGTTCCGTCGATCTCGTTCAACCG  
ATACCTCTCCAATTCTCGGCCCGTCGACCACGATCCTCCTCCTCCTCCTCCTCCTCCTC  
CTCCTGCTCGCCGTCGAGCTTTCTCGCCCTCTCATCACGATCTACGTGGCGACAGGAGCAAA  
CGTGGCGCTCGACGAGCGACTCCCTGAACGCACGACAGACGGGCGTGTCGTCGTAGCGGA  
GGGTATCCGGCGAGGCGGCACCATGACACGGGGTCAAGCAGAGGACGAAGAGATACGGG  
GACCGGGCTGCGCCGACTGAAGGACGAGGTGGTCCCGATGGTGGTCGACACTCCCGTG  
ATTTCGGGGCTGGTGGTGTTCCTGTCATGGCAGAGGTGGACGCATGCGTGGTGAACCGGAT  
GCGCGGCGACCGTGCCCAACAACAACGACAGCAACACCCACCGAGGTAGAGGCGTCATCT  
ATGATATTATTGAAAAACGAAAGAACAGCAAGAATAGATTCTGAATGATCGTGAAGTTGA  
TCGTGTGAAATAATCAGAGGAATTGTTTTAACGACCCAGGCTACTGGAACCTCGACTGTTTG  
ATCATCGACGATTAACGTGATTGGTGATACTGTTTTATTACGTATAAACGCATTACAGGAGG  
CGCGAATAACGAAAGATAACGATGGACGATTTCGATGTTTCAATTTTTTTTTTTTCAAGAAGG  
ATCACTGTTCCCATTCGACTGATCCACGAAAATTAACCTCGAATGGCGTACTCGACGTACA  
ACGATACAAATTATCGGATAAAATGGAAGCAAGATTAGTGGTGGAACAAGGAGGATCGTT

GAAAGAAAGGAACGAATTCGCATTATCCGGCGGTGTCTGAAAAACGTACGGGAAGAGGA  
G

355. >MSTRG.7547.7 Gene=MSTRG.7547

CGCCGCGACGCCTTCGGAGACGTATCGTACATATACGAAACGGTGGAACGGTGATCGCCG  
GTGAACACGAGGCGATTACATTATCCCTCGAGGACCTCGATTGTGCTGTGTTTTTTGTGAT  
TGATCCACCACTATAACGGATTGGAGAACGGAGTGGAGAAAGGGAGAAACGAGAAGATC  
AGTTTGCAAGGGGAGGCGAGTTGCGAGCAGGGGCGGAGGAGGACTTTTGGAGGAGCTGGG  
GAATGTTACGCCAGCCGTGCGGAGATACAGGTGAGACCGTGGTGAAACGACACACGTGC  
TCCAGGGATGCGGGAAATCGCCGCCCCATTAGAGTTCCATCCCGTGAGGCGAGCGTTGCCG  
AGCGGAGCGTGAAACGAAGCGTATCCACCTCCCTTACCGGAAAACCGTGAGAGGATGCGA  
TTCACGGGAAAGCTCGAGGGATAATAAAATATCGGAATCCTTCCTTAAACCATTTTTCTTAA  
AACCCCCCGACCGCTATGAAGGAGGGAAGGGTAAAATTCTATCGAGGAATCGTCGAATA  
AATATGAGGAAGGTGAAGATTCTCGGGTTATCACGAACCCCTCTCATCGCCGAGAAAAAG  
AGCACGGACAGTTGGACAGGCACGAAGTACCTTTCATTACCGCGTCTCCTCGATCGTCTTA  
ATCCCGGTTGCTCGATCAATGCGCACCAAGTTGAAACTGAGGGAAGGGTGTGTTAAGCCGT  
TGGAATTGGACGTCGAGGTAACGATAACCGATCGAACGAGATAGTATCGTGCCTCTTTCGC  
GCCCCGCCCGTGTACCGTTTCGAGCCGTGAGAATAACCGTTTCGAGTCGATCGACTCGAAC  
GAGGTGAATTTTTGTTGTTGGAAAGTGCGTCGAGGAAAGTGTGTGTGCAACAGCAGTAAGT  
AGCAAGTGTGAAAAGACAAAAGCTACACGGTTCGTTTCGTTTCGTTTGGATTATCTCATCTT  
TCGGTTCGGTCTGTCTTGACCGATTTCATCCCGTTCCACGATGCCGTTCTTCCATCGTAAA  
AAAATATAACGGCTTATGGGGACGACGGAGGGACGAAGAGTGAGAGGGAAGCGGGCCG  
CGATATATCTGCACACCATTTGGACGGTATAATCTCGTAAAAGCTGCACACAAGTGTCCATC  
TACGTGAGCCCGTACGTAAAGCCGTCGACGAGGATCACGAGGTCTCTAACCAGGAAACGT  
GGTACGCCGCGCCACTTTCGACCACGCTTCGTTCCAAGTGTATTCCACGTGACAGAGGAACG  
TTTCTCGAGGAAACGATCCCTCGAAGAATATACTCGGTCACGGACGGTGTGAACCGTTG  
GGTGATCTCGTAAACCCTATCCTGAACCCTCACCGTCGAGACTATATTTTTGGATGGATCTT  
ATAATATATACGAAGTGACAGTAAGTTCTCTGTGATGCTTCGCTTCGTGAAAAGCTTCTGGCT  
GTTTCGAGCAATTTTATCGTATTTATACGTAAAAAAGAAAAAAGAAAAAGAA  
GAAACGAATTAGAGGTATATAATATTTTATAATACTAGATTTAAAAAAGATAGA  
TTCAATTTTGTTTTAAATTTTGTAAAGGAACGAGAGTTTGTAAAGATTGTAGAAATTTTACAC  
GAGCGATCGTAAAGTGATTTTTTTAATATATATATATAATATTCGTCGTATATTGAATAGAA  
AGAAGATTGTAGTTTTTTGGTAATTAATTGGTAATGCGCGAGTGCCACGTTACGTTATCTGA  
ATCACGGAAGGATGGATCAAGTGCACGTGAAATCGTCGAGATCGACGTCGAGGAGCAACC  
CGGCGAAAATGGCGTGCGAGAAGGCGAGCAAGAGGCTCAGGACGATTCTGGTTAAGGCGT  
CGCGCCTCGGCGTCTCGACGACGGAAGTTGCCAAGTTGGCCAGCGCCAAGAAGCTCATTC  
GCAGAGAGATCACGGATGGAAGTTGGCGGTGTTCCCTCCTGGTCATGTTCCGCGGCGGAGTG  
ATCGTCGCCTTGGCCTGCACGGCGAGGAAAGGCTGCTCGAAGCTGGAGGAGATCATTAG  
GCATGTGGCCAAAAGCACGGACGTTGTCGTTATCATCGTCATTGGAGCATATGCCGAGCGA  
AGAAGTCGAGCAACCGGAATACCTCTCTACCAAGCATCTTTATTCCGGGTAAGCAATATA  
TTTGCTGTACAGTATTTTCTATCAATCTGTAAATGTACCAAAAAAGGACCGAGCGTTCATT  
TTCGTTTATTCATCGCAAATTGATTCATCGATTTTATCCGAAACATCGTCAAAACTTTTATAT  
TTGCCGAGTACTTTAAATATTCGGTATATAACCAATATTACTAAGATATTGAAAAGAATG

GAATATTTCCGGAATAGAGAAAGAGAGGGTACGTATTTTCAATGTACGTGAAAGACTGGAT  
 GGACGTTTGCAACGTGTATCGAACTCAAAGTTTCAAGATGAGAACGCATAACGAAGTTACA  
 AAAGAGGCAAGGATAAAACTTGATTATTGAACTTGTTATTGGTTTCATCTGTTCCGGAACACC  
 TTCGCTGTTTTGCCAGTTCTTTTCCCCCTTCCCTCTCCTTATTTCTTTTTTTTTTCTTTCTAGTTTT  
 TTTTTTTTTTTTAGTACGAGCAAAACGAGAAGTTCACGACCCTGTAGCCTATATTACATCG  
 ATTCGATGAGAGACCATCGAACTTACTTTGAAACTTGAAATTGCATATTATTGGATTCTATG  
 GACGTCCACGATATTTACGAGAAATACAATGACCACGTCCAAATTTTCATCTTACACACAG  
 AATACAGCGTATAATTGCCACTATGATTATATTATCATTCAATTAATACACAT

356. >MSTRG.7582.6 Gene=MSTRG.7582

GGCTAGCAAGCCTCGCTTAAGTGTCGCTCGACAGTCGAAGCCGGTCTCTCGGCGTGCGAGT  
 ATCGAGAGTATCGCGAAAGGGTTCGTTCTCAATTTCTGTTCTCAACCGAGCGACGCGAGCTTG  
 TCACCTGTCAACCTTCGCGAAAGAAAGTTCGAAGTCGACCGAGACTTAACCTCCGCTCCGT  
 TAAATCCCTTATCGTGTGTGTCGCGCTAACGAACCATCGAGTTCTCGTTGTGCGTTCGTTTCG  
 TGTCGTGCCTGTTCCGAACACGTTTCCGCTCGCGTGTGTCCAGTGTGCAGAAGTGTATGG  
 ATGCCACGGCGGAAGCAACGCTGCCGAGATTGCGAGGACGTTCTCTCTGGCCGGTTAACTC  
 TTAGAGCCACCGAGGCGTGAGTGTCTACGCGAGTAACAGTTTCCGACTCGGTTCTCTAAAA  
 CTTTCACGGTTATTCGCCCCGGGCCCCGACAACCTTCGTGAGAGATTGTCTTCTCGTATATAGAG  
 AACGAAAGCTGATGAATAGCGAACGGAAGTCGATCGTCTCGTCGGATCGGAAGCTGTGAA  
 CCTAGAACGTTCCACGATTCTCACCAAGGTGAAACGATGCGGTGATACCCGAGGAGCCCC  
 GCTTCAACACCCGTACATATCAATTCATATCTCTGCCCGATAAACATCGCCAAACATCAAT  
 CGACCAATCAAACGAAGCATATCGAAACGCAATGAAGACCCAACGATGATCGAATCGCG  
 GCCAAGGCATATCAGGCGTCGATCAAGCGTGATCGGC  
 CAGACTGTTCAACCCACTCTATCCTAACCAGAGACCTGTCCATAAACCTTGCACCACCCCC  
 CGGTCGACGACACCAATTGAATCAACCTTGGTCCAACCGCCTCTCCCTCCCCCTCCCCCTC  
 CTCCCCTCCACCACGTCCCATATCACCACGCCCAATCGGAAATCAACGGAGAGAAGCAAA  
 TAGAAGGAAGGATGTTGCTGAGGTAACGCGGCCTCTCGAGCCGGGGTTAAGAATCGATCG  
 TTAATCGAAACCGTGCTCGAACAACGAAGGGGATACCAGGTGGCGGATTGCATAGTGGA  
 TTCGCTAGGGGAGAGAGATCCAGAGTGAAGGATGGGTTTCCCCAGGAGGAGATCCCTGT  
 GGTGTAAGGTGGCCATCCTGGCCACCGCGGTTTGGGCGACCGTGTGCTTCTCTGTACACG  
 GAGGACCGTGCCAACGCGGCTGTTCAAGGGTTGGCGCCGTCAGGCGTCGCGGCCCCCCCAA  
 ATGGCCAACGGTTTCGTGCCCGCAGCCGCGCCTCTTAGAAAGGAGACGCCGCAACCGAAG  
 CCAAAGGTGATTCAACCTGGACCCGAGCAAGGTAATTAATCGTTTGTTTATGCAAAGGGCG  
 GTCTTTTGGGAATTTTGCTTCAAAGGAAGTGGAAGGGGGAATGAGAAATTTTATGGTAGG  
 AGTTTGGGAAGGAATTTCTGGAGTTTGTTCAGAAAAATCGTGGAATAAATGTGTAAGAT  
 GAGAATTATATAATAACAATAGGTTAGGATTTGGGAATTGAAGGAGCAAGAAGGAGTTTCG  
 AAAGTTATATGAAGAAATAACCAGGAGCAGGGATATGGAGGTTATGTTTCTTGGCTGTATT  
 AAGCCAAGATGTGGATTGGCATTGTAGCGTTATGAATTTATTCTATAGTTGAATTATAA  
 GGAATTGAAATGAGGGAACATTTTACAAGATATTTTGTATATATTTTGTATTTTTTGGATA  
 TAATATTACACAAATTTATGAAGTTTGTAAATGAAATTGTGCATCATGTACGAACATCGCCA  
 TAACCTCCAAAGCTATAAGCTTCAACCTAACATTTTTGCATATCTATCTCTCCTCCAAACTTC  
 ATCCTTCAAAGATATCTTATATTTTTTACAGACACCTTCCTCATCGTTAACTTATGGTTGGAA  
 TCATAAATCGAGGGGAAAAAGAGCAGCATCTTTCCAAGTATCTTTCTCTCTCTCTCTGCG

TCGTTTCAGGAACAAAGAACGTCCGATGTACAAAAGATTGCAACCGGAATTTCGAAAGAG  
AGTCGAAGTGGAGGGCGGGGGTGGTTGATACACGAGGGTAGTTTCACCGCGGCAAAGTTC  
GCAGCTCTAAAGCAATTTGTCGTGCTCTTTATTGCCGCATCGCGCGCACCGGGGCCACCTC  
GCTCGACCGGGATAAAATTATTTCTAGACGAAGCCAAGATGCCGTGGAAACGTCTCTCCC  
CCCTCCATCCCCCTCTGTCTCTCTCTCTCTTTCCCTCTGCCATCTTACCTATGCCTTACCGGTG  
CCAATATGACGGGCGAAAAATAAAAAGTCGAATTTGTTCTGAAGGCTCTTAGAAAAGGAG  
GCAGGTTGGATGGATACATTGTGAAAATTCAATTCGCGTCGTCTTCCGTTTTCCGCCGTGCTT  
TCTGCAATCCATTCCGCCCTCGTTTGTATTTGTTTCGTTTCGTTTGCCTGTGTCTTTATTGCCCCCGC  
GATAAAGAAATTGGATTTGGAAATCATTTTGTAGCGGATCGATAATAAGTGAATGAGGC  
AATGTGGTTTTTTTTGAAGGAAGGGAGAGAAGAAAAATAATTTGAGCATATGTAGATCAGT  
ATCAGTTTAGAGGATAACTATGTTTGAAGAATCTTAAAGAGAGAAGATATTTGTGAAATCT  
TAAAGAAATTTTGTTTTTTATGAATTTTATGGTAGATAGATGAAAGTTCTTTTTTTTTTTTTTT  
TTTTAAGTTTAAAGTTAGAAAGCGGAAGTTATCGAGGATTAAATTGTACGTGACATTTGTTA  
GAGAGTTCATTAAATAAGAAGTAAGAAATTTCTTCTACAATATTATGCGTGTATTATTAAC  
AAGTTCTCTTAAGATAGAACTAAGAGGAAGTTTATTATGAACGTTATGAATCACTGGGAT  
GTTTCATGTAAGTCTTTTATGAGTTTAACTTGGGAGATATATCAGTCGAAGTTGGTGAAGAT  
ATATAAGTTTAGCATTTCAAGAGCTTAAGATTTATGGTATTAAAGATTGATGCGCTTTTATC  
AGTCAAGAGAAGTTATCCTTGACGTTCAATGCGATTTTATACATTTAAAGACTTTAGTTATT  
AAACAACAACCAATAATAATAGAATCATTTCTTTTAAATGAAATAATTTCAAATTTATTAA  
TGCTAATTATTTAGTGTATTATATCTTTACAAGAATCATTGTTTTTTTTTTGAAGAAAAATAA  
ATAAAGGATAAAGTTATTTTGTGACAATTTTTTTTGTATTTCTTCTTTCTTTTTTTTTTTTT  
TTTAGGTGCTGGTGTGCTTGTGCTCCCCGTGAACCAGATGCAAGCGCACCTGGCGAGATG  
GGAAGGCCAGTGATTCTGCCAACGAATTTGACTGCCGAACTAAAAAAGTTGTTGACGATG  
GATGGCTAAACAACGCGTTCAATCAGTACGTTAGCGATCTGATTTCTGTTCATAGAACTG  
CCCGACCTTCGTGATCCATGCCATGCAACCGAGTTTTCCGGCGCGTCGCGCCGCTTTTGCGG  
AATTAACCCAACGTCGTCTAATTAGGATTATCTATGGCCATCCCGTGAATTTACACTGCGAA  
ACATCCAATTAAGGCGGCACGATAGACAATGGGGATTGCACAGCGGCGGAATTACGTTGC  
CAAGGACGGTCCCATGCAAATAGCCTTATGTATCCCAACGATCTACGTACCCGCGAGAAC  
GGGTACGAGACGAGACCAACCAACTTGCGCTTGCGGAAATTGGAAAAAGAACAGATGGA  
CGACGGGGGAGAGGGAG

357. >MSTRG.7599.1 Gene=MSTRG.7599

GAAGGGGGAGAGTAGTAAATTCACGCGAGTGTTGGGGGGGGAGGATTGATGAGAACGCC  
TCTTCTCCTCTCTCTCTTTCTTTCTTTCTGGAACGAGACTACCGAGCATCGTTTCTTCAACGTT  
CGACGAAATTGTGTTTCCAACGACACCAGGGAATATCGTCGTTCAAGAATCGATCGATCGA  
AGAAAATTAATCAAAATCTGTGAGATTTCGTGGGATGGACTTACGGATGTAATGATAACATT  
TTTTAAATGGCGAATACGTGAATGAACCGGGATTAAATTGTTCTTAAAGTTTCCAAGAAGC  
TCGATTTTCGTGATACCAATCAAGAAATACTAATTGGAATTGACGCTTGAAAATTTCCGAAT  
GAAATTATGATCTTTCAACTGTGGAGTTTCAGAGAAGATTGAACAATACTTAATGTTTATGG  
AAAAATTAACCTCAGCGGGGTCCAAATGGGGAACAATGGGGAGCAACGGTTCGAGTGTCTG  
CTCTCTCTCGGGAAAAGTGGAAGAGTCGGAAAGTAGGATGAACCATGCAACGGTCTTGA  
TTCTTTTCGGCCGCCATTTCTAAGTGGCATCCAGAGTTCTCGCGTGAGTTCTTCTCTCCGTTT  
ATCGTCCCGCACCTTTCTTCTTCTTCTTCTTTCTTTCTTTCTTTCTTCTTCTTCCGCCCGCCAAAGA

TGTCCCTCTCCCCTCACCTCTCGCCATCGCCAGCCCGGCTCAGCCTATTTTTTCCGCGGCTTC  
TTTTAATGGCCTCTCTCGAGGTCTTATCGGTAACTCGTTCCCTCGAATCTTTTCCTCGATGAA  
GAATCTCTCTCTCTCTCTCTGTCTGTCTGTCTGTCTGTTTTCCAGCGCTCTCTAGCAACGTG  
GCGACGCTGTTGCATAAAATCGGCGAGGAAGGAGGGAAAGGAGAGAAGGAGGAAGACGA  
AGAGGATGATGGGGCGCCACTGTATAAAGCATCCGAACGTTACGGGCGGGCCTGACTCTTT  
GCTCTGCCCCGTATCTTTTTTTCCACTCTGGGTGAGCAAAGTTTCAGGTGTGTCCGTGACAGTC  
TCTGTCCTCGCGCGATCAACACCCTTTTTGGACGATCTGCATCCAACGGAGAGCGTGCTGCT  
CGTGCTTCATCGATCGGGAAACATCGACGATTCTGAAGTTGTGATTGTAAAATTCTATTGCGT  
TTGATGGATGGATGTGTTGTGAAAATAAGAAAATAATCTTTTGTATTGGAGTTGTGAAACT  
GTGTTTTTTTCGATCGATTTTTTGTAGTTTTATAGAGAATAATTTAATAATAGACTCGAGGATTG  
ATCGTTGGAATTGTTGGTCTTTGACGAATTTGTCAGCAAGTTTTATATAAGTTTGAGATTATT  
CGATAAAGAGAGTGAAGAAGTTTTAAGTTTTTAAAAATTAAGAGAAATGGATAAATTTTCG  
AGTAAAATGATGAATTTTAAATATATATGTATTGGTGGTGGAATGTATATGAAACGATATTT  
AGTTAAGAATTAAGAGGATGACACGGATGAGGTATATTTCCATGGCAATCATCGTATCCTC  
GACAGTACTCTTACGCCTGAAATTTGCTTTTTACCTGGCCCTCGTGCTCTCTTACTTTGAGAA  
AATAAAGGTGAGCAAAGTTTCAGGTGTGTGAGTGCGTTGGAATCAACAAATAAAATCCGG  
ATAATGAAACGTTAAGGCGAAAGTTTTTAAAGTTTCTTCGAGACAAATTTTTATTAGAACGA  
TATTTACTCTATTTTTATTATTTAAAAAATTTTATGAATATATTTATTGTATTTTTCCCAATTA  
AAAAAGTATCGATGCGTTTAAAGTCTAATGGAGAAGAAATAAAAAATTGTATTAATATAAA  
AAACGAATAATATGTTATATATTATTGTATTACAGTATATTCATCGAA

358. >MSTRG.7738.4 Gene=MSTRG.7738

CGACCGTGTTGTGCGTGTATATCCATCGGAAGTTTTGTTTTATCCAAGTGGGAGTTTGTAGCT  
GAATTTTTTAAACGAATAATTTATCTTCCTTAAAAAGTTTTCAACAAGAATCTCTAGAGTGT  
ACGCGCGAATCGAGGGTAGCGTGCACAGATTGGGAGTAATCAAAAAATAAGAAGCGCGA  
ATTTTATAGGTTAGGTTTTTCGTAGTCACTGAAAATAGACTTCTGAGCGTGATTCTTCGATCT  
AATTAATCGATTAAACATTATTTCTCGAAAACAAAAGTTTAAAAGTTCTAATTCAAAGTAAA  
ACGAATACAGTTTTTACCAAAATCGCGCCGATATTCTGATATTCTGCCAAAGCGACTAATA  
CTTCCGATCTGTGTTCAAAAACTTTTTAAAGCGGATGTTAATTCGATCCAAACTCCCAAACGT  
GGTCGTATAAAAGAAGCTAATACTACCAACCCCGTAATTTTTTTCGCCTCGAGTCTCTTCGTA  
CCAATTCCTTCTGGTGCCAAGAGATATACAAGAAAATGGCGTAAGTGCCAGCGACCTCGGT  
CGTGATGAAGCCACTCACGTACAGCAAAAATGAGAATCCGTACCTGTAGGTGAAGGGTGG  
CCCCTGAAATCGCAAGATTGCGACCAAGATATTCATTCACACGGGCCGTGTAACAGATGAG  
AAGTAATTTTTAGGATACCGAAAGAAATATGAAACCGAGAATTCATCAGCCTATGTAATA  
TTCACATAGAGTTAGACGACACGCGAATTAATAATTCATCTACTGGAAAATGATCATGAACT  
GACCTGAAACGACGATCTTGGTCTAAGCTTACTACCAACCTCGGCTTTGAATACAGATATGT  
ACATCACCATTCCCACCAGCATTAACAAACCTGAAAGAGAACTGATTTAATAACTTGAAA  
CGTTATCTCTTGCGCCACCAATTCTCTTGTGACAATTTACAAAGTATGGATCTCTCATCGTA  
ACGCGATTATTTTGATGATGACTTTGATCTTTGATTTCTTCGCGCAAGTTCAAAGAGTGGATG  
GACATGAAATACTTAATTCTATTCAAGTTGAGAAGAAATGGCAGAGCGAGCAAAGTATCCTG  
GTGCAATATAAGCTCGGTGTACTTTATTACTACCGGAAACTATGAAGACCACGCCAGCGA  
CAAAGACGCAAAGTCTGTGTCTCGGGTGAAGTAACTGAGCTGTGAAGTAACAAACTTCGGC  
TACCACCAGCAGCGATGTTGCAGCGAAGAAGAACATTGCCGACTTGGTAACTGCATATGGT

ATAGCCATCGTCGAGTCGCTCGGATCAGGGCTGTACTCCTCGTTTGAAAAATAGTCGATCCT  
CGAGCACTCGTATTCCATACGGGAGCC

359. >MSTRG.7747.3 Gene=MSTRG.7747

AAATATTATATAATGTTTATTTTTAAATTAAGTATCTTTTTTAGAAATTTATAAAGATTTA  
GATATAGATATAAATGAAAGGTTTAGATATAGGATTTTCCAATATTTTTAGAATATTATATA  
AATACGACATGATGATCAAAGTTTAATAAACACGGAAATGTGTTAATTTACTTTGATTGCG  
GTACAAGAGCTGTTTGATATTGTGCAGTATAGTCTAAACCGCAATGTCGAAAAATAACTCT  
GCTTTCTGAATATAGAAAGCAAAGAGGCACGACATATTCCATAATCTCTTTGAAATCCATT  
GGGTGATGATCATTGAGACAAACCATGTCTGGCATAATTCTACATATAATATAGAAAATAA  
TTCTATATAATATAATATAATATAATATTATAATACTATACTTACTTTTTTTGGTTTTTTTTTA  
TTGTATTTTATACATATATATTTTTCTTTATTTATTTAGAGGTGAATAAGAAAGAAATTGTAG  
AAGCAGTTACCATTTTAGAAACACCACCTATGATTGTAGTTGGTGTAGTTGGTTATATTGAA  
ACTCCGCATGGTTTACGTGCTCTTACTACAGTATGGGCAGAACATTTATCTGAAGATTGTCG  
AAGAAGATTTTATAAAAACTGGTAAGAAAAAAAATTGCTATTTATTTTTTTTTTTATGT  
ATTTATAGTATAGAAATATATTTTAATGAATCTTGAATTAGCTCTCCGCTCAATTTGATGAG  
AGCATATATTTGAATCTTGCCTTAAAAAGAAATAATTCTTTTAAAAGGCTGATTCAAAATGT  
GTATAGTCTCCGCTCATTACGATGAGACTAACACGTTGCAGATAAACAGGTATTTATAAATT  
GAAAACAAAAAGCAGCCATTACGGTTCCTTTTCTACAGGTACAAAAGCAAAAAGAAGGCA  
TTTACAAAAGCTTCCAAAAAATGGCAAGATGATCTTGGTCGTAAATCTATAGAAAACGATT  
TAAAAAAAATCATTAAATATTGTAAAGTTGTACGAATTATCGCTCATAACGCAGGTAATTCTA  
TTACAAATCTAATTTATCTAATTTTTTTTTTTAAAGTAAAATTTTACTTATATAAAGTTTATCA  
TAGATGAAATTATTAAGACAACGTCAAAGAAAGCCCATATAATGGAAATTCAATTAAT  
GGTGGAACATTGAGCAGAAAGTTCAATGGGCTCGTGAACATTTAGAAAAACCAGTACCTG  
TCAGTAATGTTTTTGCTCCAGATGAAATGATAGATGTAATTGGTGTACAAAAAGGAAAAGG  
ATATAAAGGTGTTACATCGCGTTGGCATACAAAAAAATTGCCACGCAAAACACATAAAGG  
TCTAAGAAAAGTCGCTTGTATTGGAGCTTGGCATCCTAGCCGTGTGTCTTTTACTGTTGCAC  
GTGCTGGTCAAAAGGGATATCATCATCGTACAGAAATGAATAAAAAAATTTATAGAATTGG  
ACAAGGAATTCATACTAAAGATGGCAAGGTTGCTGTATGGGTCCGAAAAAACGTGTAATTA  
CATTACGTAAGTCCTTATTAGTTCATACTAAACGATCAGCATTGGAGAAGATCAATCTTAAA  
TTTATCGATACAAGTTCCAAATTTGGACATGGTCGTTTCAAACCTGCTGCTGATAAGACTTC  
ATTTATGGGTCAACTTAAAAAAGATCGTATGCGTGAGGAACAACAAGCACAAGCTACTAC  
CTCAGCACCATCGGCCGCAAAT

360. >MSTRG.7772.2 Gene=MSTRG.7772

GTTCTATATTGAGTATTTAATGATTTAATAATTATTAATTTAATTATAGTGATATTTTTT  
TAGTCACATATAAGGTATAAGAAATAATAATATATTGTTTTAAATATATATGCTATTATATT  
TTATTATTTCCATATAATTTTGTAATAAATAAATAATATACATTAAGAATTATTTAAACAA  
ATCGTGTTTTAAATTTTAAATTCCTTTATATTAATAAATTTTCGATTATTATAATTGTTAATTAA  
ATATAATATTGTACATTAATAATTTAAATTATTAATGCGAAATTAATTTTCTGAAAGGTTATC  
TTATAATATTATAACAATTGTCCAATATTATATCAATGATCAGATAAACTTTTTTGCCTGAT  
GAGAAGATAGATTTGTATAATTGCATTAACCTAATATTATTTATGTAAAAAAAATTATTT  
ATTTAAATATATTAAACGTTTCAAGAAATGCCACGATTACCATTACATCCTTCAACTGGAA

CTGGCATTCTCTAATTTATGGCCTAAAACGATACGATTTGTTTCGTTATGGATGTAGCAATAGA  
CCTTTCTTTTCATATTGTTGTTATGAATACTAAACATAGGCAATATAAACCTCCAATAGAACAA  
ATTAGGCACATATGATCCTTTGCCAAATAAGTATAATGAAAAAATAGTTGCTTTCAATTTTG  
AACGTATACAATATTGGTTGGGACAAAATGTTACAGTATCAAAACCAGTAGCAATACTTTT  
AGGACTTGCAGGTTTCTTTCCAATACATCCAAAAACATATATGATATCATGGAGGAAGCGA  
AGAGCTATTGAAGAAGCTAAAGCAAA

361. >MSTRG.7825.1 Gene=MSTRG.7825

CGCCGTCTTCTCTGGAACGTTACCAATCACAACAATGGCGAATGCAATTCGGTCAGTTCA  
CTGAAACGCACGATTAATCCGTTGTAAAGCTAAACCGCGTCGTGGATTGATTCCATTTTATA  
ATCGCATCTTCTTCGCGATAAAACACATCCGTCGTTATTGTTTCATGAAAAAATTACTTCGAT  
TTTTCTTAAGATATACCGCAGACAAACGCACAAAAGCAATATCGGCCGACATGTAAGATTT  
TCGTTTCGGAGCCACTTTAAGGGGCCAAGCGGGGTCGCCGATAGGCTGCGTGTGACGTGGTT  
GCGTTTATTGACCATAACCCCTTCTACTCCCGTCTGCAACTTCACGACGGACAGGTGTACG  
ACCTGAGAGACCGCAAAACAATTGACCAAACCGACCGCGTCTTAAATACACGGCATTGT  
CAGAGAATCAGAAAGATGCTTGAATGTTTCGACCTCTTATCGTGTCCACTGATGGTGTATT  
ATTCTTCCTTTTCATCAATAATATGATTGTTTTCTGCAAAATATTCAACTCACGGTAATTTTC  
TTGACGCATTGAAAGACCGGTTTCTTCAAGAAATGAGAAAAATTTTGACGAGCTTTCTTCGGT  
TCTTTCAGACGAGAAGGTTATGTAAAAAGACCTTAATTATTCTATAACGTGTGAATTATAAT  
CTCTAGAGGTATATAATAAAAAGCTATTGTTTCCAATGTATATTCCATCATATGAATATTAT  
TTTCTTTTATTGCTAGTAAT

362. >MSTRG.7866.1 Gene=MSTRG.7866

AGCAATTAATAGACAAAATTGAGAAATATCTATATTAACCTCTTAATATTTTTATATCACCTG  
TAAGAAATAGAATCTAGACATTTGGTTTCTGTGGTTCTTCGGCGAAATGATGGCAGTTGATT  
TCGTATCAATTAGAAAGTTTTAAAAATTAGTTTCTCTTCAGCGAGAAATAAAAATATTTTAA  
GTGATTGGTAACGTGATATGTCAG  
ATAATTACAAAATGTCTGTGTGCTGAGTTTTTAAAGGGCCTGCCTTCTCACAATGAAAATAAC  
TTCGCTAATTTTCATACAGATAGTGGAATAGAACATGTGTAAAAAAACCTTCAGTTTATCT  
TCCTACAAAAGATCATCCTTCAGAACAAATTATAGTTACAGAGAAAACAACCATACTACTA  
AGGTATCTTCATCAACACTGGGACAAAATCATGCTGATAGAAAACGTGATTTTTTGTCTGT  
GAATGGTGATTCTGAAGATGATGCTGCTACAGTTCATAGCAAAAGGCCACGTCTTGATTTA  
AACAACTACTATATAAACTACAACTCAGTTATAATTTTATTATTATTACCTACCTACATTT  
CCATTATTTGCTAAACTAATTTTCATTGTTTATTAACTATATAATTCTTAAATATTATAAAC  
ATATCTACGATTACAGAAAAATTATTTCAAAACGTTGCTTTTTAGATGTTAAATATACACAAA  
TTGAATTAAATATTATGTGAATATTACAAATGTAGGAAATAACGTTTTCAAATAATATTTCT  
TTGGATATGTGAAATCATGTAATAATAACAAGTATTACATTAATTTTCATGTTTCGTCGCTTACT  
ATATTGTATATTTGATATTTGGTTTCGAAAAATTTGTATTTAGCATAAATAATAATTGCTCTAT  
ACTGCACAATATGTATAGGTGAACGTGTTTCATTGTTATTGACAGCAAAACATGACTAATGT  
AACATATGTGCGTTACGATTTAAGAAAAAATTATTAACATTTTATTAATTTAAGATATAATA  
GAGCATTTATTGAAATAATTTGTAAATTTGTTTTACAATGCACATGTTTTCAAATCTGTATT  
ACATATTTATGTAGTAATAAGTTTAAATGTACGTCTAATTTACAAAAAAATATATTCGATATA  
TTATTCTTAAAA

363. >MSTRG.7931.1 Gene=MSTRG.7931

TTCGAAAAGGAAGCAGCCAGTCTGTTTCGGATGTTTGGAGTCGTAAGACGTAAACGGATAG  
TATCTCTAAATGTTAACCGGTTTCGCGAGAAGTGTGTCAAAGTCGATGTAACGTGTTCTGTGC  
GTCCATAATCAACCGTAGCTCTAAGTGTCTTCGGA CTTCGGATATGGTTTCTGTCTAATAAA  
AAATGCCGGTGCGGTAGTGATCGTGGCCTCGAAGCGAGTCCTTTTACGGCGGGGACGAGCA  
TCGAAAGCGGAGGAGAGCAGCCTCCCTCTCCCCCTCCCTCTGTCTTTCTCTTTCTTCCCCCGA  
CTTTGGCCACGGCCGCTTTATCCACCGGTCCAAGACTGGAGAAGATCGCGAGAAGGAA  
GGTAGAAGAAGAGAGAAAAGAGAGAAGAAAAAGGAGAGATCGAAAGCTAGACCAGTGTCTC  
CCAGTGCGCTCGAAGTTGGCATGGAGGGATAAAACACGGTGCAGAGAATTGTGAGAAGAG  
AAAGGGGGAGAGAGAGAGAGGGGAGGAGGAGGAGGAGGATTGGAAAAATTGGCCGGT  
GGATGGATAGCGATAAATTCGGCATGAGGTAGAGGAGAATTTCTGAAGCTGGTTGGTTCGGA  
GAGAGGAGCGATCGATCGTGGAGGGATAAGGGGGGAAGCTAAATGCCAGTTAAAAGAAA  
GGCGAGGAAGGAGGGTTAGAGGTGGAAAAGTGGTCGGGGATAGGAAGAGGCGGGTGGTG  
AGGAGGGAGAGGAATGGGTGCCGGGATGGGCAGGAGCGGCACGAGCGGCGGCTTCCTCG  
AGGCACTTCCCACGGGAACGCCGCTCCACGTGGCCATGCTGGGCCTCGACAGCGCGGGGA  
AAACCACCGCGTTGTATCGGCTCAAGTTCGACCAATACCTGAACACTGTGCCACTATCGG  
CTTCAACTGCGAGAGAATCCGTGGCGGCATCGGGAAAGCGAAAAGGTGTGAATTTTCTCGTA  
TGGGACGTGGGCGGGCAAGAGAAATTACGGCCGTTATGGAAGTCTTACACCAGATGCACG  
GACGGTATTATCTTCGTGGTTCGACTCGTGCATGCGGAACGGCTCGAGGAGGCCAAAATGG  
AGCTGACCAGAACGGCGAGGAGCCCGGATAACGCCGGTGTGCCATTCTGATCCTAGCCA  
ACAAGCAGGATCTGCCAGGTTCTGAACCGGTTCTTCCCGATGTCCACAGGTGCCAAAGAG  
GTGGGCGAATTGAAAAGCACCTGGGCGTGCTGGAATTGGCGGGGATGCCGGGGAGCGCG  
TGCATCAGGGTGCAGCCGGCCTGCGCGATCACCGGCGAGGGGCTTCACGAGGGTTTGGAC  
ACTCTTTATCAGCTGATACTGAAGCGGCGCAAGCTCGCGAAGCTGAACAGGAAACGGGCC  
AGGTAGGCCAGGGCCTCGGAGGACTGCACGTGCGTCTTCTGATCTTGCAAGTCGCGGACAG  
TCTCTCCTTCGGGCACAGCCACGCCTTCCACGGTGTCTTCTTCTCCCCGTCACGATGCCGC  
GGCGCCGACCCGCTCGAGTGAACAACGGAGCTGCGCGCGCATCCAACGTCTCCACGAACA  
TTGCCCACTTCGCCGTGGACGAAGTCGTCTCGTCCGTTCCAACGTAGTTGGAATCTCTGTTG  
CGTCGCGTCGAAGATCTTTCCAAGCTTTCATCGATTCTGAGAGGATCTCCTCTTTATTCCTCT  
CGATCGGGAGATCTCGGTTTCATCGAGTTTCGGATGACTCGAAACAAGGATGGAATTTGGAA  
CGGGCGCTTTTTTAAACGCGCGAGGAGGAATGTGCAACGGGATATCCCTCTCCGCGAAGAG  
GAGGATAAAATAATCTAGGAAATTTTTTTCTAGCCAGCCAGTGGATCGATCCACTCGCTGTT  
GCGAGGCGGAGCGAAGGATGTCTGATTTACGACAACGAATCAAGTGCTTCTTCGCCCTCAG  
AAATAACAGAGAAGCTCTATTTTGCCAAAATTTTCGAGAAAACGGAAACGTTCTTAGGAC  
GTTCTCTAGGAAATACCAATTTTTAACGACCCCTTTCGGCCGATCGCCTCGGCCTTGTAC  
GGATAACGAGCTCCTCGGCTCTCCGTTCTTTTTTACACCGGCCGATGACGAAAGAAATAGG  
AACGCGCGTTTTTTTTCTTTCTTTTCTTTCTTTTCTTTTCTTGCGCGAGCTCCAGGAGAAG  
AGGATTTTCGCGATAACGAAGCTGCTGATAACAATGACGTTGAATCGTATTAATAATGCTG  
ACGCGGGCCCCGGTCAAGGAGGGAGGCCAAGATAAAAGCCACGGGTATTAATAACCGTG  
ACTCGAACCCCGCCAAATCATCGAGATTGATTAATAAATTATCTCCAACCTCTTCCCTCCTC  
CTCGTTTTCAACGGATGATTTTTATCAATTTTCGGACAATTTTACGGATATCGTCGATTATT  
AAGAGGAGAATTTTTCTTTTATTTTCTTTTTTCAAAGGTAATCGCAAATTGGCCCTTCAA



233

GCTAAGAGGAGAATAATTAGACGATTCTCGTTCAACGATCGAGCGTTGCAAAATGACGAG  
GAGAACGAAGGAGGATAAAATTCGTGGCCGGATCGGTGGAAAAGGAATGGCGGACGGAG  
AGGAACGCATCAGGAACGGAACCAGTTTCTTCACACTTTGTTGCTCGAAGGAACGACTCCT  
TCGCGGATACGCACACGCATACACGCGTGCATACTTCCTACGATTTCGCGTCGCGTTCCGGA  
ATGCGTTGAAAATGCATCGAAGGAACGATTTTCGAGCGCGCGTTTTCCGCTCTCTCTCCTCTCC  
TCCAACTTCGAGAATCCCTCCTCCTCCTCCTCGATCCATCTCTCCGATTCTCTCTCCTCGAGA  
TCTCTCTCTCGAGAATAAAATATTCGGGGGACAAGATACATATTCTCCTCTCCCCCTCCTCG  
TCACAAGCAACCTCCTTAAACAGTCGCAACTTTCCTCTCCACGGCTCGCGCGTCCCACTTGC  
GGCGCCGCTTAACCCAGTTGCGGCCAACTTCCGGTGGCACCGATCGCCACCTTAATTGCC  
ACCGCCTCTAATTACCGTGTCTCTCCCGGTCTCCGCTGACTTGGAAGGGCGTCGCGACGAG  
AGCACGCGATCCCCGTATATTGTGCGTGAATGTGTACGAGATTACGAGTGTGAGAGACGA  
GACGAGAGAGAGTGAGTAATGCAAGATGAAATTTGTATTGTACACACGACTGTAACACGA  
GTGTCGATGCTAGTCGAGCCGAGAATTATTAATTTTCGGGGAACCAAGAGAGTGTGTGACGG  
TAAACGAGTACGTGTAGCGTACGCCAAAAAAATATATATATATATATAAAGCGTTTA  
TACTTGTAAGAACATTTGTAAATAGGCAATTGCAGGCTGTAAGTTTTTCGTAGGATTTCTC  
GGCGGCGTGGAACCTGTTGGCTCGGTTTCGGGCAAATTTCTTTTCTAAACGATTTAAGGATT  
CGTGTGTTTCATTTATCGAGGTTGAACGTTCTTTTCGATAGTTTATTCCGGTGTGTTGTTCCGT  
TGAGAGAGAGAGAGAGAGAGAATGATTAAATTTAAGATTAAGAGATTAAGTAGGAAATTT  
CGTGAATTTTGATTTTCGTGATACGTACGAATTTTGATTGAACGGAAGGAAGGATCCGGATA  
GTAAAAAATTTGAATAACTTAGATAGGTAATTGTTTAATTAAGGAGAATTTGGTTCGGTTC  
GAACGTTGTGCGATGGATTAGGATGATTAATCATCGCGCGACTGATGATTAAGAGCGACTG  
ATCGACATATCAGTGTAAATAATAATAATAATAATCATTGTACGATTTATATATAATTTG  
AAGGAATTTAAATTTACCCGATCCGAGTGCCGAAGTGTTTTCCACACGTTAGAAAAAAGAA  
AAAGAAAAAGAAAAAGAAAAAAGAAAAAAGAAAGGAAATCGACCAATACGTCTGTGCGAGTAT  
GATTGTTGTTTTTATATCGACTGTCGTTCAAAAAAATTCTATCGTAACACTATACTTGCCCT  
TGTTGTGTTTTATTACCATTCGATATTTTATCTCGTGCTTCTCGATCGAACGATAGATCGCAT  
ATTTGTGTAACAATTAAACACGGAGGAGTAGCGACGAACGATTAAGAAAAGGAACGAGA  
GGAGGAATTTGCGAGAGAGAATGATCGAGTAATTGCGAGTAAGTGTGAAAGGAAGTAAGA  
AAGAAAGACGGAGAGAACGTGGAAGAGTGTACGTAAAGAAAGAAAAAAGAGAGAA  
AAAAAACCGTGAAAACGAGAACAAATTATTATTATTATATCGTCGTTTCGTCTCGCGCTT  
CAATATTCGTATATATTTATATAGCATAGACTCGCCACTCTTCTCTGTGTGCGTGCCGTAGA  
TGCGCCAGGTGAATGTTGATTGTATTACAAGCCCGGGACAACACCGGCTCCAGTCCCAAC  
CAGACTGATGAACGAATAATCCTTTCCGATGATGACTGTGAGCGAGGATTTTTTCCAAATA  
AATCAGCTAATTCCGTT

364. >MSTRG.7932.1 Gene=MSTRG.7932

GAAAGAAAGAAAAATAGAGAGAGAGGAACATTGGTTGGTGTAAATCCAAAGCGGGCCACG  
CGCGTTCGAACGCGAGGATGAGTGGCGCGCGAGACAAAAGGCCCTCTCCGCTCGAGAGGA  
GAGTTCACGGACAGCTGAATGGTGAATAATATAGCGCAGGAGGACCAAGAGAGAGGACC  
CAATGCCCTCTTTCTCGCAAGCCTTGACCACCTCAGGCGGTAGAGTGTCCAGCTTCAAATTC  
AAGTCGTCGTGTATCTTCTCGATCCACTTCATCATCGAGAAGCTGTCCAGATTCGCTTCGTTT  
GGCCCGACACAACTCTCGTACGCATCCTCGACGAACACCTGAAGACGGAGCACTTCCTCCG  
AGCAAACGGAATCCCGGAACACGGTTTCCAAAAGCTCGTTCGCGTGCTTCTCCAAATCTAC

GGCTCTGTTCTCCAACACGTGTATGCTTTCCTAGAAAAGTTTGGGTTTTTCGCGCGCATTTTGT  
 ATCGTGGTCATCATTTGAGCCATCGGCTCCGCCAGACTCTCCAAGTGGATCAACGCGTTCA  
 AATTTTGCATCTCGATCGATCTGAACACGTTGATCAGTTCGTACGGTTCCTTAAAATACAAA  
 TCTGCAGGACCTGCATCGCTGATATCTTGCTCGAAAAAATCTGCGAGAAAAACAAGTCGAA  
 TTATTCGTTTGAAACGGAGGGAGGGGAGATATTTGGTGCCTAATCACCTATAAGAGCGTCG  
 AGGGAGGCAACTTCGCCCAGCATTCTGTAACGGCCGAACAAATCCTCCGTATGGTCGTAAG  
 TGATGCTCTCCCCTGAATGACTGCGATGGATCCAATCGTGCTCCGTCCGCCAAGAAATCGG  
 AGCTATCTGATAGAGGAATCGTTGGCACATCTTCATCATTTCTCCAACCTCTCTCCCAGTGGT  
 ATACTTCCAATCTGACCCGGCCATACTCGACGGAGAGCTTGTTCTGTGATCCGTCATCTCT  
 CTAGTTTTCTTCGACTCGTTCTCAGCGAGTAATAGAAGTTCCATACTCTCCTCGTGATCCTTC  
 GAGAGAAATTCTCGAAACCGCTTATGTATCGACGATATCGTCGCTGGAAAAAAAAAAAAAC  
 ACGGATGGATGGAAGAATAAGCGATTATATAAGATATTGGATCGTGGAATTTTTTCTTTT  
 TTTTTTTTTTTTGATTTAAAACAAACACCTTGA

365. >MSTRG.7999.4 Gene=MSTRG.7999

CTCAATAAAGGGCGCTAGTGTCCGTCAAGTGTCACAGCCGTTGCCCGTCTCCTCAGTATTGT  
 AACTTAAATCGGTGATTTAATTAGGAATAACGTATTTTTTTCTAGAATTTGTGAAACATTAA  
 GCAATAATGACCGACAAGAAAGCGGACCATTACAAAGACGATTTGATCCCAGTCAGTAGG  
 TGGAGCTTCGGAGACCGGCGTTTCGCGCAGCCTAAGCCACCATAACCCGGTGACACCTCATCC  
 ACCAACAGGTTTTGTCCCTGCGCCGGCACAGCCTGCTACTTACGGTAGTACACTTGCAGGTG  
 CCGCACCGTATGGAGTATTTCTAATCAACCACAACCTATATGCCGCGCAAGGCCACCACC  
 GCCAACGTATGATCAAACCTTTACCCATCCAATGATGTATCAGCCAATGTATGGTCAAGGA  
 TATCCAGGATACTTAGCGGGTTATCCTGCATATGGTCCATTGCAATATTATCCACCATTAGC  
 TGCAGCTGCTGCATATTATCCCGCAGCGGCAATGCAACCTCCAGTTAGGCCTCCTACACTCG  
 TAATGCCTAATGGGTTCGATGCTACTAATCGATTGATAGTATTTACAACCTGTCTTGCCA  
 CCACCCCCAACAGTCCCAAATGCCGCCAATTAGCTGCAATGGCAAGTCATAGCGTGGCTA  
 TATCGCAAAAGAAGAACTTTCTAGGAGGAGGAACAGAAGGCGGTTACACCTTTGAATTA  
 ACGAGTGAATACGTGCACCAGTGGATGCGAGTTGTCTCATTCGCCTACAGGGATCGATATT  
 CAAAGTGTGTTCTAAGCCTTTTTTAAGCGCGACTTGTTTTCTGCAAGACAGACCGAAGAAC  
 AAGGGGGCTACTCGTGTTATTTTTGTTACTTTCTACATGACTATATATATTTTTTTTCGATATT  
 TTTTCTTTGGAGTCTTTAATGCTCCAACATTTAAAAAATCATCTTGAGTAGCCCTAACGTT  
 TAGAAAAAGAAAAAGGAAAAAAAAAAAAAAAAAATATGTACGTGATAGGAGCCCGAGGAATGC  
 GTGAGAGTCATTCATAGTTATGAGGCTAATTGTTGCGCTTTGTAATTCGAATTTAGCAAACA  
 ACTAGTAGTAGTAAACTTTTATTATCTTTTTTGATAAAAATTTTAGTGAAGGTAGCGAGTT  
 GGTAAAAAAAACCTTGAAAAGGTTTTAACATCGTTAGAATCAACATAATTTGACGTGTTTT  
 GCGATTAAAAGTATAAGTATGATGATATTTGAGGCTCGAGTGCCAAACGACAAAATTAAA  
 ATTATAAAAATATATCGAAGATTCTCACGTATTCAACGACTTCGAAGATACTTACCTATTCT  
 ATCTAAAAGTACGCACTCTCTCTTTAAAATCAATAGTCTTTCTTCCTAGTTGTTTGATGTTTC  
 TTTTTTAAACACAGATTAGCTAGATCGGCTAACAAAGTTATTATTTAATTGAAAAAAGGCTT  
 GTCCACGGCGTTTCGAATTTAGTTTAAAGCGGGTTAAACTGTGCTTTAATTGAAATAGTTACC  
 ATATAGTGAAATTTGTTGATAAATAATCTTTTTCTTGTCTCTTAAATAAAAAAATACCTA  
 TAATATTCAAATGATCAGTGTGAAATTTGAAAAGAATACGTGAGTATACATCCTTTCTAAT  
 TGCAATAATAATTTCAAATTTTGTTCAAATTCATAGTAATTATGTGGAAACTAGATTCAA

TCAAAGCTCATGAAGGAAACAAATAGTTGACTCAATTTCAAAGTACAAATTGAATATCCAT  
 GTAAGTAGTGGGAAAATTTCGTAACGACGGGGTCAAGCTTTATGTCAGCCATATTAGGCGAG  
 TTGCGATGATGATAACGGTAAGCAACGCAGCGAATTTCGTAATGCCTATAATTAATATTCAG  
 TGCAGAATTATTAACAACCTATACTTTTTCTGAAAACGTAAGATCTATTTCAAGAAATGAAG  
 AGACATACGAAAAATTTTCAAGATCATTAAAAATTAGTTGCACAGCTACGAAAGCGACTG  
 TTTTGCTCCGCGATCATAGGCATATAGTACAGTGAACCTGCTGATAGGATACTTGGAATGTT  
 CCGTTCTGCAGGTGCACAATTAACACGATATTAATTAAGCAATGAAGATCGAAGAACTA  
 ATTTACAATTGGTGATAGCTTAGGATAGGACCAAGAATCGCAGTTCTATTTAGAAATTTTCG  
 AAATGGGTGTTCCGGCAAACCTTGACCAGTACCCTTATATGTTTCGCATTGGGCTTTATCAGG  
 ATAGATGTTTAAAAATATCTATATTGTTAAAAAGTGATTTTTGCTTCTCCAATCAGAAGTTA  
 AAATTAATTGACGATAAATCAAATCATGATTTCTATTTTGCCCTGATGAATTATTATTTATAT  
 AAATCAAGTTTATTGCGTGAAAGTTGTAAATTTTACTTGAAAATGTTATCCAATATTAAATT  
 TTGCAGTTAAACGCAGGAACCTCCTATAAAATTACTACTGTTCTTTGTATTTTGTGATATCT  
 GATTACCTCAAAATCTAAAACAGAATATGTAGGTATTTGTCTTGTTTTGTACCATCCTCGAA  
 TTTAATTCAGTTTCTACGAAAAAAAAAAAAAAAAAAAAA

366. >MSTRG.8013.1 Gene=MSTRG.8013

CCTGTTGCGAAAGTTTTTGCTCTCTGCGTCCGATTTGTTGTGCGGGGGAGGGCAGGAGGGCG  
 CGCCGCCACGATGGTGCGAGTTCGACGCGGGAGAGGAGCCGGAGACGACATTCGGATTGG  
 CATTCCCGTCCAACATATCCGGCTCCGTGCTGTTCTGATACGACGCGTTCGAGCCACTCGCG  
 ACGAAGCCTTGCTGGAGGACGGCAGCGTGGGCATACCTCCTCGCACCACCACCGTGGGA  
 CTGTCAGGTGCGCTGTGCGACCTGCTGCCTTTATGCACCACTATACTTGGTATCTCCAGGCG  
 GGCCATGTGTTAAATGCGTCATGGGGTTACGGTGCAGACTCTGCAACTGGTGGGTTCAAAC  
 AGGTGCAACTGGGTTAGTACGTGAATCTTTCGGGTGGCGTGCAGCTCGTGGGGCTGATACA  
 AGGAGCCAAATCACTGCACGTCCACCTTCCAACATCGTACACTCTGGTTCTAAATATACGC  
 ACGACACAACCTTCACCATTTACCAATTTTCACTGTAC

367. >MSTRG.8043.3 Gene=MSTRG.8043

TAACAGATGATTGAACGCATTCTGCGGCGCGGTCTAGCATTTATCTGTCAAACTGGTGAC  
 GGCCGGCCGATCGGCGATGAGCCGGCATAACGCGTGCCTGTTGATTGTTTCGTGCTAAAGTTT  
 TAGGTTATCTACCGGAATATTTTAATAAAATACGTGTGTGTATATTGTGCACTTAACATT  
 ACGTTTTCCGAGTGGCATAAACGCGTCGATCATTTTCCCGCAGGAAATGTCACAAATCAGA  
 CGAAACAATGCGATACCCAAAAGATGGAGAATCAATGCGATGAAAACGAGAGATGCTTTC  
 AAAATTCGAAAGGGGAAAAAGCATATTGCAAATGCAAGATAGGTTACGATCTGGAGAAAG  
 GCCGATGCGTCCAGGTTACGATTACCACGGTTGCCAGTGTAAGTATCAACCAAACGTCAC  
 GGCCAATTCAGCAGTTCTGTAGCCGCTGGCTTGTTAATACCAACTTTTCTCGTAGTAATGAG  
 CGTATTACTGTATTTTGTGCGGAGGCGATATAAATGGTTGCAACGAGTTCGACAGCTTCGTC  
 CAAACCATTATGGTAATGTCCTAGTCACAAGAGACGACGATGACGATGACGATCCACCTAT  
 AGCGTAAGCAGAC

368. >MSTRG.8043.2 Gene=MSTRG.8043

CGATGTCAATTGAGTTCGATAATTGCAAATGGTCGTTTAATAACAGATGATTGAACGCATTC  
 TGCGGCGCGGTCTAGCATTTATCTGTCAAACTGGTGACGGCCGGCCGATCGGCGATGAGC



[illegible]

CGTCTATTCTCTGCGTCTTCTCCGTGATATTGAATCTGCTCTATGCTCGTCCGATCCGTAGAG  
GAATACGTTGATTAACCTTTATTTTATACGTACGTGTCGTACACGCGTCTGTCGTCCGTATTAT  
TTAACGCGAGTGAATAAAATAATTTTTATCGGTGATAAATGCGACGATCGATGTAGATTGC  
GTCGCTTGATGTCTGTTTAAAAAGAACGCCATTGATTTTCATCGTAACGTTATTTGTACTTG  
CGTACTTATCGTGAACGTGTTTTATTTATAAAAAATTGAAATTATTTTATTTTGAAATTATGGA  
TTTATTACCAGAACATAATTTCGACGTTTTGGAAAATTGGTAGATTAAAAACGTTTGAAGATT  
GGCCGTTTCAATCTTCTGACAATTTCGTGCAATCCCGAGCGGATGGCTGCTGCTGGTTTTTAT  
GTAGTGGGTGGAATGAACATATGAAACACGAATCGCAATGTTCTTCATTAGATTGGGAAA

ATCGGATGAGACTACTTGGACTGTGAACGAATTGTTTCGATTTGTTTAAAAGATATATGGTTA  
 AGGAATGCATACACGAATTGGACAAAGCTGTGATTAAGGCGAAAGAGGAAAGTGCACGAT  
 TGGTACGTGAAATACCTCATATTTATAAGAAAGTAAAGAAAGGAAAGAGAGTAAAAAATT  
 AACGATATGCTCTAAAAAAATAAGAATTAATAAGCGTTATTTATCCGATGATTAACGATG  
 TGATCTTTTCTTTTTTTTAATAAAATTTTATATTTTAAAATAAATATGAATAGGGTTTTCTTTC  
 GA

375. >MSTRG.8107.6 Gene=MSTRG.8107

AGGCGTTTCGCCGGGCAGAGTGGAGGTGGTTACGTTGTCCGCAAGGATATGTGGTTCGGTTAC  
 CGCGACGCCGCCGCGGTTTCGCGCAGGCACAGGTACGAAGTGCGCGCGTTTTTCGAGGCGGT  
 ATCACGAAAAGCGCAGGAGTGGCGTTTCTACGTATCGTTCCGATATCACTGCTACAGTTCAT  
 CGTTGATGTACAGTGGGTAGTAGGAAGTTCGTAAATCGGCAAAAAAAGAGGAAAGACGAG  
 AGGAAAAGAAGAAGAAAGAAAAGAGATAGAGCGCGGTTCTATCGCGCGGTGCAGTGTGA  
 AAAGTGTTCGCGAAGGAGGCTTTTGCTTCCTCTTGTGTGTGCGTGTACGTGCGTGTGCCACA  
 GCAAAAGCACGTAAGAACGTAAGTGTGACACACGGAAGAAGGAGAGAGAGAGAGAGA  
 AAGACGAATAAACACGGGTCTGTCGGATAATCCTTGTGTACGGTGTGCGGGTTTCGTGAATG  
 TCGTCAAATGACAGTGAGGTGATCAATGTGCTCGAAACATGGCTGAGGAGCTGGTGGTCA  
 CCTGAACCGCGGCGACTCATCCGGATTGGGTTTTTCGCTCCTTGGTACCGCGGGTTTGCCG  
 CACGTCATCTACGACATCGTTGAAAATTCGCCGGCAGCAAAGAGCGGCAAGATTGGAGGT  
 GTTACATAATCAAGAGGCTGGTCTGTGGTCATTGGCCGCTAACCCATGGAAGATCCGCAAT  
 TCTTCAAAATAAATATGGAAGAAACCTCAGAGGATATGAGTATTTTATAAAATTCAAAGAA  
 AAATTAACGAAATTATTCGAATTATTGAATAATCCAATCTAAAAAAATATTGAACTATC  
 AAATATTAGAATGTTTACTCTCGAATTTACAGAATTTTAGAATCTCTTAAATTCACACATT  
 CATTCCATAACGAAC

376. >MSTRG.8116.7 Gene=MSTRG.8116

TTTTTTATATTAACTTTACTAGAAATATTTTAATATTGACTAGTCTTAGATATATTTTAGAAT  
 ATGTAAATAAATTATTTATTAGATTTATAAAATTATTATTATAATAGATATAAACTTCTACA  
 AATACAATAAATATTCTTTAAATTGTAATATATATTCTTTAAATTATTATTATTATAACAGAT  
 ATAAAGTTCTATAAACACAATAAATATTCTTTAAATTATAATATATAAAATATATTCTTTTCG  
 TATATACAATAATTCAGTTTATGATGATAGATCCAAACTAAATTTTTCTTTATTTATAAAGA  
 AGTTTTATTTATTAAGAAATCTTTATTTATAAAGTTTTACATATTTTTATATGTATATAGAGA  
 ATTAAGTTTTGAGATATAAAAAATCGGTCAAGATTTCAATATGCTCATATTGCCAAAAGCA  
 AATTGACTTCGGCAATAATCGGATACAATTAGTTTGTACAATTATTAAGAGTGATAGCTTGA  
 TAGTATCCGATTCTTGAAATTGTATTGAACTTTTAGAATTCTATCTTACTCAAATATTTCA  
 AAATTTATCTCGAATGTTTCTTTCTAATAACATTATCCATTAATTTGTTATTACATATATAG  
 AATTTTTTATTCAAACCTTTTCAAATCTTTTCTTTCTTTGTTATTATTCGTTACCAAAAACTTCTA  
 CGAATTAATTAATACAAGAGCAAATTTCAAAAAGAAATCAGATCATACTTTCGGAAAATATT  
 TTATATATACAAAAATATTAAATTTTTTTTTTTATGTAATTAATTATTGAGGAAAATTTAGTTT  
 TTTGATCATCCTTTGTATATAAATCATAAATAATCACGAAAGTATAAAAAATAAATTCATATC  
 AAGAACATAAGTTTATTGAATATAAATCCGTTAAAATAAAGAATATAAAACAGTTTAAACC  
 ATCTGACAATAACAAACCATCGAAAAAATTAAGAAAAAAGGAATCGTCGAAAGCAAGA  
 GATCAGGAGGAAATACGTACATACACATGCGCTTAAGTACATGCATACATACATATCAAG

AGCAAATCGAGTTCTCCAGATGTTCTCGAGACGAGAACATTTTCGCCGTCTGTCTCGAGAA  
 AACAAAGAAAGAGACGGAGCGAACGAATAATTTAAGCGGAGAAAGAGAGAGAAAGAGAG  
 AAAGAGAGAAAGAGAGAGAGAGAGAGAGAGAGAAAGACGCGTGCAAAAGTGAAACGGAAG  
 CAGAAAGAGAAAGAGGATACTGGAAGGAAGGAGAATATGCACCGTTTGCCAGGTTGCGAT  
 TGCAGGGAATGGTGGGGGCGGAAAGAGCCGAGTTAAAGAGGGGAGAGGTCTTCCAACCTG  
 GACATCCTGAAGTATTATCTATCTCGGAAGTTCGTCCCCGAGGCTGCGGCTGACTCCGTTGA  
 CGATGACGAAGACGACGAGAACGGTCACGCTAATCGCAGCTGGCTGGAGATTGGCTTTTA  
 GCACAGAGTTTCGACCAACTTGTATCGCCAGGAAATCGCGGGCGCACCCCTCCGCTCAAATT  
 TACAGGGCGATTCCCTCGACCGCCCCCTTCGTGCGGAGGGATGGTATTTGCGGCCACGGGG  
 GAAGCATTGATGGAAGGGGTACGATCAGGTCGACGTGGTCTCTAGCGGTGATTTAAATTG  
 CTCTAGGCGAGGGCCTCTGTGCACTTTAGTTTCTGGCTTCTTTTTAGAGATTGTTCTTTAGAA  
 GTTTGGTGGTTGATGAGGTCCTTGATGGTATACAGGTTGTAAGTGGTTTTCTTCATTGTTTTA  
 GCTTTATACATTTTTCTTTACGGGATGACTCGAGATTGGATTATTAGATTGAATTTGAAATCA  
 TGTGAGATCTTAACATTTTTTTTTAAATTCAAAAATATTTATTTTTCTTCTTTCTTTTTTAAGA  
 AAAAAGATTTTCTTCTTATGTTTATTAATAATAATAATCTTAAAAAATTTGATTGATCTTTG  
 AATTCGCGTTTTTATGATATTATAATAGTAATAATAGTAATAATTTGTTCTTTTGGATTATGA  
 AAAATTAAGTATTTATTTTAAATGTGATATTATATTAATAATAATATGAGACTAA

377. >MSTRG.8116.8 Gene=MSTRG.8116

AATAAAATATAATAAATATATATATACAAATAGATATATATATATATATAATTATAATGTTA  
 TAAATACTTAAAAGTCTTACTTAAATATTCTATTTATTAGAAAAATATAGTATTTTTTTATAT  
 TTCATCATAGTATCTTATTCCAATTTCCAGTCAATTGTATTTTATAGATTAATTTTTTTATATTA  
 AACTTTACTAGAAATATTTTAATATTGACTAGTCTTAGATATATTTTAGAATATGTAAATAA  
 ATTATTTATTAGATTTATAAAATTATTATTATAATAGATATAAACTTCTACAAATATTAAAAT  
 AAAGAATATAAAACAGTTTAAACCATCTGACAATAACAAACCATCGAAAAAATTAAAGAA  
 AAAAGGAATCGTCGAAAGCAAGAGATCAGGAGGAAATACGTACATACACATGCGCTTAA  
 GTACATGCATACATACATATCAAGAGCAAATCGAGTTCTCCAGATGTTCTCGAGACGAGAA  
 CATTTTCGCCGTCTGTCTCGAGAAAACAAGAAAGAGACGGAGCGAACGAATAATTTAAGC  
 GGAGAAAGAGAGAGAAAGAGAGAAAGAGAGAAAGAGAGAGAGAGAGAGAGAGAGAAAGA  
 CGCGTGCAAAAGTGAAACGGAAGCAGAAAGAGAAAGAGGATACTGGAAGGAAGGAGAA  
 TATGCACCGTTTGCCAGGTACGTTCTCGATGGACTTTTCTCGTAGTCACGAAAATAAATTGA  
 ATCACGCAGAAAATAGAAGTACAAACACATCCACGCCTACCGATGGCCGTAATTCCAAGC  
 TACTTTCCAGGTTGCGATTGCAGGGAATGGTGGGGGCGGAAAGAGCCGAGTTAAAGAGG  
 GGAGAGGTCTTCCAACCTTGACATCCTGAAGTATTATCTATCTCGGAAGTTCGTCCCCGAGG  
 CTGCGGCTGACTCCGTTGACGATGACGAAGACGACGAGAACGGTCACGCTAATCGCAGCT  
 GGCTGGAGATTGGCTTTTAGCACAGAGTTTCGACCAACTTGTATCGCCAGGAAATCGCGGGC  
 GCACCCCTCCGCTCAAATTTACAGGGCGATTCCCTCGACCGCCCCCTTCGTGCGGAGGGAT  
 GGTATTTGCGGCCACGGGGGAAGCATTGATGGAAGGGGTACGATCAGGTCGACGTGGTCT  
 CTAGCGGTGATTTAAATTGCTCTAGGCGAGGGCCTCTGTGCACTTTAGTTTCTGGCTTCTTTT  
 TAGAGATTGTTCTTTAGAAGTTTGGTGGTTGATGAGGTCCTTGATGGTATACAGGTTGTAAG  
 TGGTTTTCTTCATTGTTTTAGCTTTATACATTTTTCTTTACGGGATGACTCGAGATTGGATTAT  
 TAGATTGAATTTGAAATCATGTGAGATC



378. >MSTRG.8118.1 Gene=MSTRG.8118

TCCAATCTCGAGTCATCCCTGAAAGAAAAATGTATAAAGCTAAAACAATGAAGAAAACCA  
CTTACAACCTGTATACCATCAAGGACCTCATCAACCACCAAACCTTCTAAAGAACAATCTCT  
AAAAAGAAGCCAGAACTAAAGTGCACAGAGGCCCTCGCCTAGAGCAATTTAAATCACCG  
CTAGAGACCACGTCGACCTGATCGTAACCCCTTCCATCAATGCTTCCCCCGTGGCCGCAAA  
TACCATCCCTCGCGACGAAGGGGGCGGTTCGAGGGAATCGCCCTGTAAATTTGAGCGGAGG  
GGTGCGCCCGCGATTTCCTGGCGATACAAGTTGGTTCGAACTCTGTGCTAAAAGCCAATCTC  
CAGCCAGCTGCGATTAGCGTGACCGTTCTCGTCGTCTTCGTCATCGTCAACGGAGTCAGCCG  
CAGCCTCGGGGACGAACCTCCGAGATAGATAATACTTCAGGATGTCCAAGTTGGAAGACCT  
CTCCCCTCTTTAACTCGGCTCTTTCCGCCCCCACCATTCCCTGGCAAACGGTGCATATTCTCC  
TTCCCTCCAGTATCCTCTTTCTCTTTCTGCTTCCGTTTCACTTTTGACGCGCTTTTCTCTCTCT  
CTCTCTCTCTCTTTCTCTCTTTCTCTCTTTCTCTCTCTTTCTCCGCTTAAATTATTTCGTTCTGCTCC  
GTCTCTTTCTTGTTTTCTCGAGACAGACGGCGAAAATGTTCTCGTCTCGAGAACATCTGGAG  
AACTCGATTGCTCTTGATATGTATGTATGCATGTACTTAAGCGCATGTGTATGTACGTATTT  
CCTCCTGATCTCTTGCTTTGACGATTCCCTTTTTTCTTTAATTTTTTCGATGGTTTGTTATTGTC  
AGATGGTTTAAACTGTTTTATATTCTTTATTTTAACGGATTTATATTCAATAAACTTATGTTCT  
TGATATGAATTTATTTTTATACTTTTCGTGATTATTTATGATTTATATACAAAGG

379. >MSTRG.8118.2 Gene=MSTRG.8118

ATCTCGAGTCATCCCTGAAAGAAAAATGTATAAAGCTAAAACAATGAAGAAAACCACTTA  
CAACCTGTATACCATCAAGGACCTCATCAACCACCAAACCTTCTAAAGAACAATCTCTAAAA  
AGAAGCCAGAACTAAAGTGCACAGAGGCCCTCGCCTAGAGCAATTTAAATCACCGCTAG  
AGACCACGTCGACCTGATCGTAACCCCTTCCATCAATGCTTCCCCCGTGGCCGCAAATACC  
ATCCCTCGCGACGAAGGGGGCGGTTCGAGGGAATCGCCCTGTAAATTTGAGCGGAGGGGTG  
CGCCCGCGATTTCCTGGCGATACAAGTTGGTTCGAACTCTGTGCTAAAAGCCAATCTCCAGC  
CAGCTGCGATTAGCGTGACCGTTCTCGTCGTCTTCGTCATCGTCAACGGAGTCAGCCGCAGC  
CTCGGGGACGAACCTCCGAGATAGATAATACTTCAGGATGTCCAAGTTGGAAGACCTCTCC  
CCTCTTTAACTCGGCTCTTTCCGCCCCCACCATTCCCTGCAATCGCAACCTGGCAAACGGTG  
CATATTCTCCTTCCTTCCAGTATCCTCTTTCTCTTTCTGCTTCCGTTTCACTTTTGACGCGCTCT  
TTCTCTCTCTCTCTCTCTCTCTTTCTCTCTTTCTCTCTCTTTCTCTCTCTTTCTCCGCTTAAATTATT  
CGTTCGCTCCGTCTCTTTCTTGTTTTCTCGAGACAGACGGCGAAAATGTTCTCGTCTCGAGAA  
CATCTGGAGAACTCGATTGCTCTTGATATGTATGTATGCATGTACTTAAGCGCATGTGTAT  
GTACGTATTTCTCCTGATCTCTTGCTTTGACGATTCCCTTTTTTCTTTAATTTTTTCGATGGTT  
TGTTATTGTCAGATGGTTTAAACTGTTTTATATTCTTTATTTTAACGGATTTATATTCAATAAA  
CTTATGTTCTTGATATGAATTTATTTTTATACTTTTCGTGATTATTTATGATTTATATACAAAGG  
ATGATCAAAAAACTAAATTTTCC

380. >MSTRG.8118.3 Gene=MSTRG.8118

TCTCGAGTCATCCCTGAAAGAAAAATGTATAAAGCTAAAACAATGAAGAAAACCACTTAC  
AACCTGTATACCATCAAGGACCTCATCAACCACCAAACCTTCTAAAGAACAATCTCTAAAAA  
GAAGCCAGAACTAAAGTGCACAGAGGCCCTCGCCTAGAGCAATTTAAATCACCGCTAGA  
GACCACGTCGACCTGATCGTAACCCCTTCCATCAATGCTTCCCCCGTGGCCGCAAATACCAT  
CCCTCGCGACGAAGGGGGCGGTTCGAGGGAATCGCCCTGTAAATTTGAGCGGAGGGGTGCG

CCCGCGATTCCTGGCGATACAAGTTGGTCGAACTCTGTGCTAAAAGCCAATCTCCAGCCA  
GCTGCGATTAGCGTGACCGTTCTCGTCGTCTTCGTCATCGTCAACGGAGTCAGCCGCAGCCT  
CGGGGACGAACTTCCGAGATAGATAATACTTCAGGATGTCCAAGTTGGAAGACCTCTCCCC  
TCTTTAACTCGGCTCTTTCCGCCCCCACCATTCCCTGCAATCGCAACCTGGGAAAGTAGCTT  
GGAATTACGGCCATCGGTAGGCGTGGATGTGTTTGTACTTCTATTTTCTGCGTGATTCAATTT  
ATTTTCGTGACTACGAGAAAAGTCCATCGAGAACGTACCTGGCAAACGGTGCATATTCTCC  
TTCCTTCCAGTATCCTCTTTCTCTTTCTGCTTCCGTTTCACTTTTGCACGCGTCTTTCTCTCTCT  
CTCTCTCTCTCTTTCTCTCTTTCTCTCTCTTTCTCTCTCTTTCTCCGCTTAAATTATTGTTTCGCTCC  
GTCTCTTTCTTGTGTTTCTCGAGACAGACGGCGAAAATGTTCTCGTCTCGAGAACATCTGGAG  
AACTCGATTTGCTCTTGATATGTATGTATGCATGTACTTAAGCGCATGTGTATGTACGTATTT  
CCTCTGATCTCTTGCTTTGACGATTCTTTTTTTCTTTAATTTTTTCGATGGTTTGTTATTGTC  
AGATGGTTTAAACTGTTTTATATTCTTTATTTTAAACGGATTTATATTCAATAAACTTATGTTCT  
TGATATGAATTTATTTTTATACTTTTCGTGATTATTTATGATTATATACAAAGGATGATCAA  
AAAACATAA

381. >MSTRG.8116.9 Gene=MSTRG.8116

TTAAAACGTTGTCAGAAATGAGCGTTAATGTATATTGTCAGATACGCGGTATACATTCCGCGT  
GATCTTTAATGTTACTCCGTGTATTGCGTATCATTTCTCGCGCTGTATTTTCTACATATCGTGA  
ACGTGTGTATGCACCACCGTGTGTCGTTGTTTCTTATATGGGAATCACATTTATTACCGATC  
ACGTATACACATATTTTCACTCGTATTACGTGCGTGTGTATAGACATGTTTGTGCAGTGTAAT  
GTGCATGTGTACTAAAAGTCGCTTGCAATCCAGTCGAGAACGGAATCAAGGGAGCGCCTTT  
CTGTGTGCTCATCGTGAACGGAAAACCATACGAGTATTATTGTGATCGCTCACGTATGATGC  
GAGTTTCTAGAAGATTTGCGTGTATTTTGTGCGTGACAATATATGTTTTCTCTGACAAGTAAA  
TTGTGGTTTTATTAGTATACTACGTCACATCGGTTTCTATGTGTGTCTATCTGTTACCGCAAA  
CTGCGTATTGCATGTTTGATGGAATCATTGACCTCGCGAGCAGTTGACCGAGTTTTATGTTT  
GTGGATTAAGAAAAACAATTATAGTTTTGTTTAAACTGAAAATTTCTTTTTTGGAAAACCTTA  
AAATTTTATGTTTTATTTTGAATAGTTGTCTGTTTGAATTCCATTGAAATCCATTAAATCA  
TTATAATAACATTCGTTGTATATATTTGAAATATCGCAACATCTAGATCCATTCTTTCAGCCA  
TTTGGTATATGGCTCTCGGTAAGATCTACGCGTTCAAGGTCGCTGCACAAAACAAGTAGCC  
GGCACGTAAAGTGGTCGCATGCACATGCACGCTGTACACGATACGCGATACTCGTTTCCTG  
ACCAAAAATAATAGTTCGTCGAGCGCGCACAAAGTCGAACCGGCCGCTGATCGAGGTCAGG  
TTCTTTTGCATTGTTTATTTCGTTTCATTGCTTGTTCAGTTGCTCGCGTCTGCGATAAATTACC  
AGCGACACGCGTAATCTCGACCCTTCGACTCGCCTAGTGACTGTACTATAGTGTTCTTTCC  
AATTGTACCGTTTCGCGCTTACTTGCTCTCTTGCGCGCGCTGTTTTCTGTCTTTGTCTGTATGT  
ATTCGTGAAATACGCTTTTCGGTTCGCTCGCACGCGACTCCGTGTATGGAAGTGTGGAGCAG  
CGGTGCGTCGTATTTTCTGTCTCGCATATATTTTATCGGTTGTTGATTTTTTTTTTATTTACGCT  
GATTTGGTGTGATCGTAGTGAATGTTGTGAAACGAAGGTGAAGAAAGAAGAGAACCGACG  
AAGATAGATAGAGAAAGAAAAGAAAGGGACAATAACGTTACAGGAATAAAGTGAAACA  
ATATTGAGCGGGAAAAGCAAACATATAAAAAAGGGGAAAAGCAAACCTGGCGTGTGAGT  
AGAAGGGCAAGTGAACTTGAGTAAGATAAAGACAGACGCGAACGAGGTAGATTGAAA  
ATCGGTGAAACACGGCTACGAAAGAAAATTAATACTACGAAACAGTTGACGGGATATATC  
TAGTAGAAAAAAAAGACAGTTCTTGATGCGTAACGCGGTTGGAGGAAAGGCCTGGCCA  
TCGATTTGCCGTCCGTGAATCTAGTGCGCGTTTGAATCGGGCTAGTCTCGCGCGCGCGTGT

GTGTTACGTGCACCTAAGCGAACGCAGCCAGCGAGGCGCGCGGACGGACGAGAAAAGGA  
GGAAGAGGTGGCGGTGGTGGAAAGAGGGGGCGGAGAAGGAGAGGCGGTTGAACAGGCGGG  
CGGAGAGAAAAGTTCGAGAAGCGGCAACACCAGTGCCAGCCAACATCAACAACATCAAC  
AACACAACAATACAGATCGCTGCGGTGTATACAGGGCTGCTGCTCGTGGTGTGCGTTTTG  
AACGTTTATCGCGTTGTGTGTGCGCCGCGCGCGGCGGTGATCATCGGTGTGTGTGCCGGGAAT  
TGCAGAGAAAGAGGTAGTGAACCGAAGCCGCCAGAATTACGCCAAACCGGGGAAATATG  
AGCATTGCTGCCCTACTACAGGCCGCCGAGTATATTGAACGAAGGGAAAGAGAAGCTGAA  
CATGGCTACGCTTCGACGATGCCGATGCCGATGATATGCGGACGGTCACAAAAAGGCCA  
AAGACGAAAAAATCCCAGGGCAGCAGGACAACCTCATAACGAGCTGGAGAAAAATAGGTG  
AGTGTACTTATTTCAATTAACCTACCATCATCGAGAAATTGATAAAGAATCTCTAAGGTACA  
GTTACTTTAATCTGCCATTTCTCGATAATCATTTTCGATATAACGATGAATATTAATCTCAGCA  
CTCGGTCTAGATCGAATAAAGTTCGGAACGCTTGTTATCGAGTCGTTCTCGCGAATATTTCA  
TTAATCAGAGTGATTTCGATTCCATTTATCACGGTGGAAAATTCGTTTCCAACTTTTCGCTT  
GAAAGACGCCATTTATGTTTCGTCTCGTTCAAAAGAGAATTTTAAGCAATCTTATCGCGTTA  
GATTTATATATTTATATTGATTTATTCTCATATAAATTTACATCTAATTCTTGATGAATTAATT  
TTTTAATTGATATAAATTTTATTGAAAAATCTTTATGTAAATCGCTTTTGATCTTTTTTTGAAA  
AAAATTACTTTTTTATAAATTATTAATAATAAGAATTAATAACAATAATGCATTAAAATATG  
TAATATTTACATTATTATAAAATGAATATTTATTTATTAATTATTTAATAGCC

382. >MSTRG.8164.4 Gene=MSTRG.8164

GAGAGCGGCCACGGGGTTGGCGGAGGGAGAGCCCGGTGGACGAGCGGTTATTTCAAGCG  
ACGACTCTTCTGGCACTTCGCCCCGAGCTTTCCTCGAGCGCATCCTCTCGCCTCGGACTCTC  
GCGTTCTCGTGTCACTGTCGCCGCGACGCCAGCCACAGTCAGTCAGTCAATCAGTCAATCG  
GTGAACGGTGGGAGAGACGATTGGAATAATTTAAAGATCGTCGGCTCGGAAAAGAGGAAA  
ATAAAATAAAATAAAATAAAATAAAATCGTTGGGGAGGAAAAGTTAGGGTACTGTGGATAA  
TTTCGAGGGGAAATTGAAGAAAAAGAAATTCGAAGAAGATTAAGAAAAATCCTGTCTGAT  
CTAACCTAGAAAAAGATCCAACCTAGAAAAAGAGAATCTTTTCGAAAAAAGAGCGAAA  
ACGACCGATTTCCAAAGAGATCCTGCTTCTCCATTTAATCACGAGTGAAGAGTTTCAAAGTT  
TCGAAGGATTCCCGCGGAAAGGTGGCCGGAAGTGCGTTTCGCGACTCTTCTTTTCGCGTGATC  
AGTGACCGAGCAGTGAAGTAAGGGTGAACAGGTGTTTCCCCAACACGGTGGTGGTTGTC  
CACAGATTGTAAAAAAGAAATATATAATATAAATATATATAAACGAAAAGTGTCGAAAAA  
TTGTGCGAAATATCGTTCTTTTTTTTTTCTTTCTTCGATCTTCGCGTTTCGAGGGAGGAAGGG  
AGGAAGGGAAGGAGGGAGGGAGGGAGGGGAAGGGGGGAGGGGGAGATCGATCCGGCA  
CGAGAAGATGGAAGGAGAGGAGGTGGATTATAATACTCTCCGCTCTGCTCGCCTGAAAT  
AACAGGAGGAATGCGCGCGTGGTGAATCAGCTTCCTCTTTGGAGAGTGCGAATTTCTTCC  
GACAGCGCGGCCACGCGATCCTGGATCGAGCGGCCAGGATCTCTGGATCGTGTTCCGGTGT  
GTGCGCGCGCGCGCGCGTTCGTGCACCTTTGAGAAAAGCCAGAAACGCCAGAAGCTCGCG  
ACACGGGGAGGAGGGAACGGGAGAAGAGAGGGCCCTCATCAACTCCGTTTTTTCTTGGA  
AGGAGTCGCGATTGCCTAGGGCCATGACGATATTTTCGTGGTTTCTGGTGGTTCGTGCGAC  
AATGTCGGGACGTCAACTCCCTGTAACGAACGCTTATTTATCCGGCTCGCGATCTGGCGGA  
CCACCGCGTCGAAAACCTGGTTTCTCGATGAATGAACGAAGAAGAT

383. >MSTRG.8168.2 Gene=MSTRG.8168

TAATGGAGTAATGTTCTCTTTCTTATAGTAGTGTATGGTTTCTAACGAAAGTATTATATGTTA  
 TAATTCTTCTATCTAGAATGCAACGAGTTATTACTACAATTTCTCGAAATATGGCTTTGTTGA  
 GCCAAGTAAGAATGGTTGGAGAACGTGGATCAGGAGCAGGTAAAGGAGGTGGTGGTGGTG  
 GCTCTATTCGTGAAGCTGGAGGATCTTTTGGAAAAATGGAAGCCGCTCATGAAGATCAGTA  
 TTTCTATAATCTGCAAAAACAACAGCTACAAAAACTTAAAGAAGATCTTCACGATGAAATC  
 TCTTTCCATGAAGAACAATTAACCGTCATCAAGAAGCTATAAACCGCCATAAAAAAAGA  
 ATCACAGAAATGGATAAGAAATAAAATTATCCATGTATTTACTCTTTAAGCGTTTGTTATTC  
 TTTATAATGTAATGCTCTT

384. >MSTRG.8177.1 Gene=MSTRG.8177

ATTAAGTCTAATTTTCATCGACAGTAATTAGCGCGCACGAGCGCGCGCCTGTCACGCGCTG  
 ATTTAATTGCACTCTCGCGGACACTCTCTTTACTTCCCTCCCCACCAGTCTTGTGGTGCATCT  
 TTTCCGTTTCTCCGCTTGAACCGATCGCGCCACCGTTCCCGCAACTAGCCTTCTTGTTTTGG  
 TCGAATCCAATTAGCCTCTGAAATGAAACTGAAGACGAATGGATGCGGGTGAATGCGCGC  
 GCGCATGCTTGCAAGATATCCGCGGATGCAGGAGGCAGCCGGCTGGGAGGATGACGGCGA  
 GCGCGCAAGAGCGAGAAGTCGGTAACTTAACTGGCCTAAATGGGTTTAACTCGATGTGATT  
 TTGCTGGCGAACCCTAAATTGAACGAATACGAACTAACTGAACTCAACTAAGCTAATCA  
 TATCACATTACTAGCGTTATTAGCCGAGAGACGATATAAGTGAAGGTCCGGTGGTACCAGG  
 CTGCAGTAACGGGTCGCCTCCTGCACTGACCCTCTGTACGACTTTCTTTTCGACCTCTTTTTC  
 TCGATCATAATGTTTCGTGTCTTGTATTTATTCGATCTTTGAATTACGGAAATGTGTTTACGGT  
 CAAGTTTTATCGCAATTTCGATTCCAAAACAACCTTTTAGATTTCGAAATCGTGATTCAAAGGA  
 GAAAATGTAACATCGCAGCCCGATGACGTCGCATCCTTATTAACCCGACGTGGTCACATCC  
 GTCGTCATCCCGTTCTGTATTACGTGCAGGGTGTTCCTCGTAATGATATCTTCATTTATGTA  
 TTGAAACTATCCTATAAAATTCTATCAAATTATGTATTCATGTATTAAAAATTTCTAATATA  
 ATGGTACATATGATA

385. >MSTRG.8216.2 Gene=MSTRG.8216

CGTAGAAAGCCAGTTGGACGGCGGCGCCGCACCAGGTAGGCGTAGGGACGCGCCTTTTCG  
 ATCAAATAACGGCCGCTTGTGATTTTCGTGCGCCCTTTAGTGCCTCCCTTCCTCGTTGAAAC  
 GATTCAATTCGATTCAATTTTTCAATAGACGATTGTGCGAGATCGAATGAGACAATTTGGAAG  
 AAAGAATTAAGAAGAGAAGGAAAGATAAAAGAGGACTTAGAGAATAAGAGAGAGAGGA  
 GGATCGGAATTCTCGATCTTCTCGATCGTGATATCACTTTTAATTGAGTGAGAGGAGGGAGA  
 ATAATCGTAATCGTGATCGAGTATAGTACACGGATAGAAGGAAAGTTTGGAAGGGACGG  
 AAGTCGGTGGATCAAGTGCCTTTTTTCTTTCTGTTTCGCGGGGATACCGTTGGTCCCGCCCCT  
 CTGGGCGGCTCCTGGCACCCGGAAGTATCCTCGGCCCGAATACTGACGGACCTGTCTCCC  
 AGTACGAGCTCCCATCGCCGCAACCAGGATGTTTTTGTCTCGAGAGCTTTCCCGCCGATTC  
 TCTTCGCGGCGCTCTTCTCTGCATCGGGCTGGCACACGGTATCAGATGTTACAAATGCGGA  
 CAGTACAACGAGGGAGTCGGCAGCATCACGCCGTGCATCAATTACACCGCTCACATGCATC  
 TGAAGGAATGTCCACCCTCGGCCGAATGGTGCATCAAATATGTCAGCGAAGGGTTCGATAGT  
 TCGAGACTGCGTGCCAACGTGTGTGGAAGAGGAGGCTGGAGCACGATGACGTATTGTTGC  
 CAGCAGGACGGTTGCAACTCGGCCCCATCGGTTGTATCCAGCAACAGCCTCGCGATCGTCG  
 CGATCACGATGGTGCTCCTCCTTGTGCTTCGTGGCTAATACGTCGTTTCCAGCGACCAGGTG  
 ACCGCGAATGGAAGCTACGGGATCCCTTCGACATACCGCGCTAACCATCGATTATTGTCC

TGGCCTTTATCTTGCTGATTGGACGCTGACCAGTCGATAGTTGTCTGAACAATCTTGATCTGT  
GAAATGAATATCTGTGAAATTTCCATCCTTCAATCGATTTTCTACGCGCTCCACCATTCTCAT  
AGATTCTTTGGTTTGAATAAATCTTTTTTTTTTTGGTTTGATAAAGTAAGTTTGAAAAAGTAT  
GTGATGCTCCATTTTTCTATATTTCTTTTTATTTACCTTTCTATTATTCTTTTATTTGCATCGAC  
GTTTATATTTTTCTTCTCCTTTTTCTGGGTAAATGAAGAAACCATTCTTAATACGTAATAAAA  
TGTATAAATTAACGGAAAGTTTAATTGGTGATTCAAGTTTCTTAATTTCACTTTAGTTCACC  
AGCGAAACGCTCTCTCTGGAGAATTTTATTCGATTTAATTTAATTTTTGTGTAAAGAAATTCC  
GTTCTATATACGTATACGAAAGTTCCTTAAGTTGTTTAATTCGTTTCCCCTCTCTCGTTAAAT  
GTAAAACATTTAAGGAAATTAGGAACATCCGTGAGAGAGGTTAAGTTCTTGGTAAAATTCA  
ATCTTTGTTCTTCGAGAGATAAAGATATTTCTTTTCTTTTTGATTGAAATATTGTTTAAATTG  
GATAATTTAAATTTTGTACAGATACATTCTACTAACTTCTTTTATTCTTTTTTCTTTTTATCTA  
AAGAAAACAATTTTTCTATGTTTCATCAACCTTACACTTTGAACAATCTTATGATTCCATGAG  
ATACTTTCTTATGGATTCTTTTTATGACATTTTCATACATTCTGAAGAAGATCGAATTCTTTTCA  
CAGTTGAATTTCCATCGGTCAGCTTCCTTTTATTCGAAGCTGACACTCGCTTCTTGAGCGACT  
CTTGAATTCGATTTATTCGAGAACTGGTTCGCCGATTCTTCCACCTCTTTTCTTCACCTTCATAC  
CACTGCAACCATGAGTGCTCGATCTAACAAGAGCTGGAAAAGGGGGATTCTCGATGACAC  
GTTCTCTGCTTCGAACAGAGACGAAATGGAATTCTTCGAGGTTTGAAAATGTTATTTTCGAT  
GATTCATTCGTATTACTTTCTTATGTAATCTTTTATCATTAATTTCTTGAGTATCGATTTAAT  
CCAAAGAAATTTCTCATATTACGATATTATATGATCCTGAAAATTATAGTATTTGGATTATT  
ATTTTATAATAATAGTTAATAATTAATTGAATATTCATTAAATTTAAATTTGTAAATATTGC  
ATTAATTCGATTAGATTATTGTCTGAATATTGATATGAAATAGATAATTGTTATAATTTTGTTA  
TTTTCTTTTTATTATACATAATTTGAAAAGATTGAAATTTATTTATTCGACGATACCATTAGA  
TTATCCGTCTATTCGCCATATACTTTATTTCTTTTGCCTTTTGGTTTTGCTTCAAAAACCTCT  
CAGCTTCATTCACGATGATCGATTTTTCGATTCTTCTTCTCCTCTCTATCGGTTTCCCATTAG  
TTCTTCGACTTTTTCCATCCCATTTTCCCAAGTTTATTCTCCTCTATTTTCTTTTCATGACAACA  
CTTGCCACATATTCCACTGGATCTCTCTTCAAAAATATTTCAAAACTTATTCTGTAAATATTCA  
AACGCAAAAAAATAAATAAATAAATAAATAAATAAATAAAGGAAAACGTGTATTATAA  
TTCTAATATATTTTCGAAAAGAATCGAAGGAAAATATGAAATATAAAATGAGAGAGAAAA  
AAAGGAGAAATAGACAACCTATCGATTTCATCGTCAATTCCAATCGAGCAAAAATTGGCTAC  
CGCGATCGCGAGAAATAGAAAAAATAAATAAATAAATAAATAAATAAAGGAAAACCGTGAT  
AGCGGATGAGATAAAAGCGGAAGTACGGCGAAAGCGCGGAAAAGGATTTCTCGATGGTT  
CGATCGTTCGTGGTCAATCCGACATATTTCTATAGTTCGTAAGATTTCGTTACGAAGGAGAA  
AAAAGAAGGGCAAAAAAATAAAGAAAAAAGAATAAGTTAGTAATTTGGAAGAAATG  
ATAAAAGAGAAAAAAGAAAAAATAAAGAAAAAAGAAAAAATGAAACCCGCGTGATA  
TATATATATGTATACCTATATATATATAACCTACATACAGACAACAGTTTAATGAGGAACA  
GTGAGGATAATAATGATAATGTTATTATTATTATGATTACTATTATTACTATTATTATTATTG  
ATTATTATTATTATGAATTATTATTATTACTATATTGCTACTAATTACTACTATTACCATTAAAC  
TATTACCATTACTAAAAGATTAAACGACACTAAACTGGAAGTATTACACCGATTATACATAA  
ACTTAATTATACATATATATATATATATTATAAATATATACATAGTAGCGATAAAAGATC  
GATAGGCGTCGAAATCGAATGGAGAGTTTGTGCGATTATTATTACTACCGTTGTAACCGCTTG  
AAGTAGCCTTAATAATTGTAATTAACGAACGCACGCGTGAGATATTAATAAATAAATAAATAA  
ACTGCGTAATATCTTATTGGTTGGTGTGAGGAGATTGCGTATTACCTCGTTTTAATCTTGTTT  
TCTAAATATTTATTTTTTCTTCTCTCTTTTCCAATGATTAAAAGTTTTGAAAGAAGTCGTC

AAGTAGAATTATAAACACTTCTACGAAGAATTTTATTAAATAACAATTTTTCTCTTGCACGG  
 TATCCTATTTCCATGCTGCTCGTATTGGTCAATTAAAAATCATTCTGCTTAGTCAATTACCAC  
 GAGTAGAGATTTACACGAGTTGAATTGCTATGAGAGATAAATTTAAAACGGACTTTTTAAT  
 CAAAATAAATAATTTTCCCAACTTTCTCTGATTCACGAATTTTTCTCTTTTTTTTTTTGTTTCCCC  
 TTCGCTAAATCAAATAATGAAAAACAAGAATTAAATATTTATTAAACTTAATTTTTATCGTT  
 TTCGATATAGACAATCGAGATTAACGAGAATATTCGTTCTCTTCTCAGGTTAACCAACAT  
 CTGAAATTCCTAAATTGTAGAATGATTCATCCTAGCCGGTAAGCGAGTCACAAATAGTAGA  
 GATGATAATCTACTTTACCTGTTTCACGAATGAAAGCAATGAAAATAATAAAAAAAAAAAAA  
 AAAAAAGAAAAAAATATCACGAAGGTAGCATACAGAAATTATTAGCGATTATATACCTGT  
 TCTTCTGAGATTAGGCGAAGAGATGATTTATCTAAAGTGAAAATTAGCTCGAGTCTAGCGT  
 AAATGATACTTAAACACTTAACCTGTTTCCCGTCACGGATGTCAACCGATCGATTAACATTG  
 TTATTGTTGGACGAATGTTTCGAGGTAGAAATTATTCCAAATTCGAATAATTTTTCAATTTTT  
 TAAAAATAATGATAGAAATCGATTGCAATGTGGATTTTCGATGCAACGTTGTTAATTCGAG  
 ACGGAGAGGTTAGGTTTTGATTACGTACTGCCATTACGTATTTGAATGGAAATCGATAAATT  
 GACAAATTTAATATAAACATTCTGTAATACAGTAGAGAAAATATATGTGGAAAATTTATAA  
 TACAATGTAATTTTAAAATTTTCTTGTATGATAAGAGCTTATATAATGAAAATATATATAA  
 TAGTATTCGTGAAATATATATTTGATGAAAACATCTACAATAGTATTTCAATATTTAATGA  
 CACTAGTGTGAAAATTTGTCAGGTGATCGTATCAATATTGGAAATTTGTCACATCACAGGA  
 ACCGTATATTCGTACAAATATTTGAAATTTGTCACGATGTTACGATCAAAATGTCACAATGT  
 TCGCCATGATAAAATTCAGCCATATGACAGCAAATAAATTAATCTTTGCATTTTACTAGTCA  
 TCTTACAATTTCTTCTATATAACTGTTCTTATATCTAATATAATAAAAGGGGAGGGAAAAAT  
 CCCAAATTGAACAACGACACGAATCTATTTATATTAATACTTTTCAATTATTGAATCAAATAGA  
 AATAAGTTGCTTAAGATTCCAAATCTCCACGAATAATAATCTATGAGTTCTAATCTATAAAT  
 CTATTCTAATTTAATAAATCAAGATTCTATTAATTTAATCAAGTAGAAAAAATGTTTCATCA  
 AAAATCCATGAAGAATCGAATTCGATATTCACACCACGAACATTATATAATCCCGTTTTA  
 AATTGAATAAAAAATATTTGTTAAAAGCTACAATTGTTGCGGATCACTTCGTTCAAACCTTCG  
 TTACACTTTATCCATGTATTTTTATAACACAAAGTGACAAAGGTGGCGCTTGTGTCCACGTG  
 GATACGCAATCATTGTGGCTCTATCTACCTTCCAAATTTTCATAATCTCGATCTTCGATTGTT  
 CGTACATACATACATATACGATTTAAATTGCAAAAAAAAAAAAAAAAAAATAACAAAAATA  
 ATTTTAAAGCAAAAAAATTTTAAAGCAATTCTACCTCGAATCATTCCGTATTATATCCATAT  
 CAATAAAAAAATATATAAATAAAAAAAAAAAGAACGAAGGATTATTGAATATCGAAGTTTT  
 ATCAGGACGCACACAAGCAAAAAAAGAGCGAAAAAAAACCATGACTTTTCGGATAATATA  
 TTAACAAGTTATATATTAACGATACTATAATTCTAGGCGACTTCCTTAGCGTGTAAGATTTT  
 ATTATATTCAACAAGGAACGCTCGATAATAAATCCGACATTGTTCCAAGCTCCTAAATAAA  
 TGAGTGAAGATTATTAACAAAAAAAAAAAAACAGAATAAACGAAAAAAGAAAAAAGA  
 AAAAGGATAAAAAGAAAAGTTTCTACATCGATTATCGGTTATCGAATAAAGATCGATAAG  
 TGGATACGTGATTTCCGTGCGAGAAAAGTGTTTAGAAAGTGAGTATAGATGGCGTTTCA  
 ACGTACAGCGTAACATTTTACATTTGCTTCGAGCACTATTTCAATAGATACATTATTAAAGA  
 AGTTCGTGAGAGAAAAGATAAAAAAAAAAACGTCTAAACGAG

386. >MSTRG.8216.1 Gene=MSTRG.8216

CGTAGAAAGCCAGTTGGACGGCGGCGCCGCACCAGGTAGGCGTAGGGACGCGCCTTTTCG  
 ATCAAATAACGGCCGCTGTGATTTTCGTGCGCCCTTTAGTGCCTCCCTTCCTCGTTGAAAC

GATTCAATTCGATTCAATTTTTCAATAGACGATTGTCGAGATCGAATGAGACAATTTGGAAG  
AAAGAATTAAGAAGAGAAGGAAAGATAAAAAGAGGACTTAGAGAATAAGAGAGAGAGGA  
GGATCGGAATTCTCGATCTTCTCGATCGTGATATCACTTTTAATTGAGTGAGAGGAGGGAGA  
ATAATCGTAATCGTGATCGAGTATAGTACACGGATAGAAGGAAAGTTTGGAAGGGACGG  
AAGTCGGTGGATCAAGTGCCTTTTTCTTTCTGTTTCGCGGGGATACCGTTGGTCCCGCCCCCT  
CTGGGCGGCTCCTGGCACCCGGAAGTATCCTCGGCCCGAATACTGACGGACCTGTCCTCCC  
AGTACGAGCTCCCATCGCCGCAACCAGGATGTTTTGTCTCGAGAGCTTTCCCGCCGATTCT  
TCTTCGCGGCGCTCTTCTCTGCATCGGGCTGGCACACGGTATCAGATGTTACAAATGCGGA  
CAGTACAACGAGGGAGTCGGCAGCATCACGCCGTGCATCAATTACACCGCTCACATGCATC  
TGAAGGAATGTCCACCCTCGGCCGAATGGTGCATCAAATATGTCAGCGAAGGGTTCGATAGT  
TCGAGACTGCGTGCCAACGTGTGTGGAAAAGGAGGCCTGGAGCACGATGACGTATTGTTGC  
CAGCAGGACGGTTGCAACTCGGCCCATCGGTTGTATCCAGCAACAGCCTCGCGATCGTCG  
CGATCACGATGGTGCTCCTCCTTGCTGCTTCGTGGCTAATACGTCGTTTCCAGCGACCAGGTG  
ACCGCGAATGGAAGCTACGGGATCCCTTCGACATCACCGCGCTAACCATCGATTATTGTCC  
TGGCCTTTATCTTGCTGATTGGACGCTGACCAGTCGATAGTTGTCAACAATCTTGATCTGT  
GAAATGAATATCTGTGAAATTTCCATCCTTCAATCGATTTTCTACGCGCTCCACCATTCTCAT  
AGATTCTTTGGTTTGAATAAATCTTTTTTTTTTTGGTTTGATAAAGTAAGTTTGAAAAAGTAT  
GTGATGCTCCATTTTCTATATTTCTTTTTATTTACCTTTCTATTATTCTTTATTTGCATCGAC  
GTTTATATTTTTCTTCTCCTTTTTCTGGGTAAATGAAGAAACCATTCTTAATACGTAATAAAA  
TGTATAAATTAACGGAAAGTTTAATTGGTGATTCAAGTTTCTTAATTCACTTTAGTTCACC  
AGCGAAACGCTCTCTCTGGAGAATTTATTCGATTTAATTTAATTTTTGTGTAAAGAAATTCC  
GTTCTATATACGTATACGAAAGTTCCTTAAGTTGTTTAATTCGTTTCCCCTCTCTCGTTAAAT  
GTAAAACATTTAAGGAAATTAGGAACATCCGTGAGAGAGGTTAAGTTCTTGGTAAAATTCA  
ATCTTTGTTCTTCGAGAGATAAAGATAATTTCTTTTCTTTTGATTGAAATATTGTTTAAATTG  
GATAATTTAAATTTTGACAGATACATTCTACTAACTTCTTTTATTCTTTTTTCTTTTTATCTA  
AAGAAAACAATTTTTCTATGTTTCATCAACCTTACACTTTGAACAATCTTATGATTCCATGAG  
ATACTTTCTTATGGATTCTTTTTATGACATTTTCATACATTCGAAGAAGATCGAATTCTTTCA  
CAGTTGAATTTCCATCGGTCAGCTTCCTTTTATTCGAAGCTGACACTCGCTTCTTGAGCGACT  
CTTGAATTCGATTTATTCGAGAACTGGTTCGCCGATTCTTCCACCTCTTTTCTTCACTTCATAC  
CACTGCAACCATGAGTGCTCGATCTAACAAGAGCTGGAAAAGGGGGATTCTCGATGACAC  
GTTCTCTGCTTCGAACAGAGACGAAATGGAATCTTCGAGGTTTGGAATGTTATTTCGAT  
GATTCATTCGTATTACTTTCTTATGTAATCTTTTATCATTAATTTCTTGAGTATCGATTTAAT  
CCAAAGAAATTTCTCATATTACGATATTATATGATCCTGAAAATTATAGTATTTGGATTATT  
ATTTTATAATAATAGTTAATAATTAATTGAATATTCATTAAATTTAAATTTGTTAAATATTGC  
ATTAATTCGATTAGATTATTGTCGAATATTGATATGAAATAGATAATTGTTATAATTTTGTTA  
TTTTCTTTTTATTATACATAATTTGAAAAGATTGAAATTTATTTATTCGACGATACCATTAGA  
TTATCCGTCTATTCGCCATATACTTTATTTCTTTTGGCTTTTGGTTTTGCTTCAAAAACCTCT  
CAGCTTCATTCACGATGATCGATTTTCGATTCTTCTTCTCTCTCTATCGGTTTCCCATTAG  
TTCTTCGACTTTTTCCATCCCATTTTCCCAAGTTTATTCTCTCTATTTTCTTTCATGACAACA  
CTTGCCACATATTCCACTGGATCTCTTCAAAAATATTTCAAACTTATTCTGTAAATATTCA  
AACGCAAAAAAATAAATAAATAAATAAATAAATAAATAAAGGAAAACGTGTATTATAA  
TTCTAATATATTTTCGAAAAGAATCGAAGGAAAATATGAAATATAAAATGAGAGAGAAAA  
AAAGGAGAAATAGACAACCTATCGATTTCATCGTCAATTCCAATCGAGCAAAAATTGGCTAC

CGCGATCGCGAGAAATAGAAAAAAAAAAAAAAAAAATTGGACCACAAAAAACCCGTGAT  
AGCGGATGAGATAAAAGCGGAAGTACGGCGAAAGCGCGCGAAAAGGATTTCTCGATGGTT  
CGATCGTTCGTGGTCAATCCGACATATTTCTATAGTTCGTAAGATTTCGTTACGAAGGAGAA  
AAAAGAAGGGCAAAAAAAAAAAGAAAAAAAAAGAATAAGTTAGTAATTTGGAAGAAATG  
ATAAAAGAGAAAAAAGAAAAAAAAAATAGAAAAGAAAAAATGAAACCCGCGTGGATA  
TATATATATGTATACCTATATATATATAACCTACATACAGACAACAGTTTAATGAGGAACA  
GTGAGGATAATAATGATAATGTTATTATTATTATGATTACTATTATTACTATTATTATTATTG  
ATTATTATTATTATGAATTATTATTATTACTATATTGCTACTAATTACTACTATTACCATTAAAC  
TATTACCATTACTAAAAGATTAACGACACTAACTGGAAGTATTACACCGATTATACATAA  
ACTTAATTATACATATATATATTATAAATATATACATAGTAGCGATAAAAGATCGATAGGC  
GTCGAAATCGAATGGAGAGTTTGTGCGATTATTATTACTACCGTTGTAACCGCTTGAAGTAGC  
CTTAATAATTGTAATTAACGAACGCACGCGTGAGATATTAAAAAAAAAAAAAAACTGCGT  
AATATCTTATTGGTTGGTGTGAGGAGATTGCGTATTACCTCGTTTTAATCTTGTTTTCTAAAT  
ATTTATTTTTCTTCTCTCTTTTCCAATGATTAAGTTTGAAGAAGTCGTCAAGTAG  
AATTATAAACACTTCTACGAAGAATTTTATTAATAACAATTTTTCTCTTGCACGGTATCCTA  
TTCCATGCTGCTCGTATTGGTCAATTAATAATCATTCTGCTTAGTCAATTACCACGAGTAG  
AGATTTACACGAGTTGAATTGCTATGAGAGATAAATTTAAACGGACTTTTTAATCAAAT  
AAATAATTTCCCAACTTTCTCTGATTCACGAATTTTTCTCTTTTTTTTTTGTTCCTTCGCT  
AAATCAAATAATGGAAAACAAGAATTAAATATTTATTAACCTAATTTTTATCGTTTTCGAT  
ATAGACAATCGAGATTAAACGAGAATATTCGTTCTCTCTCAGGTTAACCAACATCTGAA  
ATTCCTAAATTGTAGAATGATTCATCCTAGCCGGTAAGCGAGTCACAAATAGTAGAGATGA  
TAATCTACTTTACCTGTTTCACGAATGAAAGCAATGAAAATAATAAAAAAAAAAAAAAAAAA  
AGAAAAAAAAATATCACGAAGGTAGCATACAGAAATTATTAGCGATTATATACCTGTTCTTCT  
GAGATTAGGCGAAGAGATGATTTATCTAAAGTGAAAATTAGCTCGAGTCTAGCGTAAATGA  
TACTTAAACACTTAACCTGTTTCCCGTCACGGATGTCAACCGATCGATTAAACATTGTTATTGT  
TGGACGAATGTTTCGAGGTAGAAATTATCCAAATTCGAATAATTTTTCAATTTTTTTAAAA  
ATAATGATAGAAATCGATTGCAATGTGGATTTTCGATGCAACGTTGTTAATTCGAGACGGA  
GAGGTTAGGTTTTGATTACGTACTGCCATTACGTATTTGAATGGAAATCGATAAATTGACAA  
ATTTAATATAAACATTCTGTAATACAGTAGAGAAAATATATGTGGAATTTATAATACAA  
TGTAATTTTAAAAATTTTTCTTGTATGATAAGAGCTTATATAATGAAAATATATATAATAGTAT  
TCGTGAAATATATATTTGATGAAAACATCTACAATAGTATTTTCAATATTTAATGACACTAG  
TGTGAAAATTTGTCAGGTGATCGTATCAATATTGGAAATTTGTCACATCACAGGAACCGTAT  
ATTCGTACAAATATTTGAAATTTGTCACGATGTTACGATCAAAATGTCACAATGTTCCGCAT  
GATAAAATTCAGCCATATGACAGCAAATAAATTAATCTTTGCATTTTACTAGTCATCTTACA  
ATTTCTTCTATATAACTGTTCTTATATCTAATATAATAAAAGGGGAGGGAAAAATCCCAAAT  
TGAACAACGACACGAATCTATTTATATTAATACTTTTATTATTGAATCAAATAGAAATAAGT  
TGCTTAAGATTCCAAATCTCCACGAATAATAATCTATGAGTTCTAATCTATAAATCTATTCT  
AATTTAATAAATCAAGATTCTATTAATTTAATCAAGTAGAAAAAATGTTTCATCAAAAATCC  
ATGAAGAATCGAATTCGATATTCCACACCACGAACATTATATAATCCCGTTTTAAATTGAAT  
AAAAATATTTGTTAAAAGCTACAATTGTTGCGGATCACTTCGTTCAAACCTTCGTTACACTT  
TATCCATGTATTTTATAACACAAAGTGACAAAGGTGGCGCTTGTGTCCACGTGGATACGC  
AATCATTGTGGCTCTATCTACCTTCCAAATTTTCATAATCTCGATCTTCGATTGTTTCGTACAT  
ACATACATATACGATTTAAATTGCAAAAAAAAAAAAAAAAAAATAACAAAAATAATTTTAA



AGCAAAAAAATTTTAAAGCAATTCTACCTCGAATCATTCCGTATTATATCCATATCAATAAA  
 AAAATATATAAATAAAAAAAAAAAGAACGAAGGATTATTGAATATCGAAGTTTTATCAGGA  
 CGCACACAAGCAAAAAAAGAGCGAAAAAAACCATGACTTTCGGATAATATATTAACAA  
 GTTATATATTAACGATACTATAATTCTAGGCGACTTCCTTAGCGTGTAAGATTTTATTATATT  
 CAACAAGGAACGCTCGATAATAAATCCGACATTGTTCCAAGCTCCTAAATAAATGAGTGA  
 AGATTATTAACAAAAAAGAAAAACAGAATAAACGAAAAAAGAAAAAAGAAAAAGGA  
 TAAAAAGAAAAGTTTCTACATCGATTATCGGTTATCGAATAAAGATCGATAAGTGGATACG  
 TGATTTCCGTGCGAGAAAAGTGTTTAGAAAAGTGTGAGTATAGATGGCGTTTCAACGTACAG  
 CGTAACATTTTACATTTGCTTCGAGCACTATTTCAATAGATACATTATTAAAGAAGTTCGTG  
 AGAGAAAAGATAAAAAAAAAAACGTCTAAACGAGA

387. >MSTRG.8216.3 Gene=MSTRG.8216

CGTAGAAAGCCAGTTGGACGGCGCGCCGCACCAGGTAGGCGTAGGGACGCGCCTTTTCG  
 ATCAAATAACGGCCGCTTGTGATTTCTGTCGCCCTTTAGTGCCTCCCTTCCTCGTTGAAAC  
 GATTCAATTCGATTCAATTTTTCAATAGACGATTGTGCGAGATCGAATGAGACAATTTGGAAG  
 AAAGAATTAAGAAGAGAAGGAAAGATAAAAAGAGGACTTAGAGAATAAGAGAGAGAGGA  
 GGATCGGAATTCTCGATCTTCTCGATCGTGATATCACTTTTAATTGAGTGAGAGGAGGGAGA  
 ATAATCGTAATCGTGATCGAGTATAGTACACGGATAGAAGGAAAGTTTGGAAGGGACGG  
 AAGTCGGTGGATCAAGTGCCTTTTTCTTTCTGTTTCGCGGGGATACCGTTGGTCCCGCCCCT  
 CTGGGCGGCTCCTGGCACCCGGAAGTATCCTCGGCCCAATACTGACGGACCTGTCTCTCC  
 AGTACGAGCTCCCATCGCCGCAACCAGGATGTTTTGTCTCGAGAGCTTTCCCGCCGATTCT  
 TCTTCGCGGCGCTCTTCTCTGCATCGGGCTGGCACACGGTATCAGATGTTACAAATGCGGA  
 CAGTACAACGAGGGAGTCGGCAGCATCACGCCGTGCATCAATTACACCGCTCACATGCATC  
 TGAAGGAATGTCCACCCTCGGCCGAATGGTGCATCAAATATGTCAGCGAAGGGTCGATAGT  
 TCGAGACTGCGTGCCAACGTGTGTGGAAAAGGAGGCCTGGAGCACGATGACGTATTGTTGC  
 CAGCAGGACGGTTGCAACTCGGCCCATCGGTTGTATCCAGCAACAGCCTCGCGATCGTCG  
 CGATCACGATGGTGCTCCTCCTTGTGCTTCGTGGCTAATACGTCGTTTCCAGCGACCAGGTG  
 ACCGCGAATGGAAGCTACGGGATCCCTTCGACATCACCGCGCTAACCATCGATTATTGTCC  
 TGGCCTTTATCTTGCTGATTGGACGCTGACCAGTCGATAGTTGTGCAACAATCTTGATCTGT  
 GAAATGAATATCTGTGAAATTTCCATCCTTCAATCGATTTTCTACGCGCTCCACCATTCTCAT  
 AGATTCTTTGGTTTGAATAAATTCCTTTTTTTTTTGGTTTGATAAAGTAAGTTTGAAAAAGTAT  
 GTGATGCTCCATTTTCTATATTTCTTTTTATTTACCTTTCTATTATTCTTTTATTTGCATCGAC  
 GTTTATATTTTCTTCTCCTTTTTCTGGGTAAATGAAGAAACCATTCTTAATACGTAATAAAA  
 TGTATAAATTAACGGAAAGTTTAATTGGTGATTCAAGTTTCTTAATTCACTTTAGTTCACC  
 AGCGAAACGCTCTCTCTGGAGAATTTATTCGATTTAATTTAATTTTTGTGTAAAGAAATTCC  
 GTTCTATATACGTATACGAAAGTTCCTTAAGTTGTTTAATTCGTTTCCCCTCTCTCGTTAAAT  
 GTAAAACATTTAAGGAAATTAGGAACATCCGTGAGAGAGGTTAAGTTCTTGGTAAAATTCA  
 ATCTTTGTTCTTCGAGAGATAAAGATAATTTCTTTTCTTTTGATTGAAATATTGTTTAAATTG  
 GATAATTTAAATTTTGTACAGATACATTCTACTAACTTCTTTTATTCTTTTTTCTTTTTATCTA  
 AAGAAAACAATTTTTCTATGTTTCATCAACCTTACACTTTGAACAATCTTATGATTCCATGAG  
 ATACTTTCTTATGGATTCTTTTTATGACATTTTCATACATTGGAAGAAGATCGAATTCTTTCA  
 CAGTTGAATTTCCATCGGTCAGCTTCCTTTTATTCGAAGCTGACACTCGCTTCTTGAGCGACT  
 CTTGAATTCGATTTATTCGAGAACTGGTTCGCCGATTCTTCCACCTCTTTTCTTCACTTCATAC

CACTGCAACCATGAGTGCTCGATCTAACAAGAGCTGGAAAAGGGGGATTCTCGATGACAC  
GTTCTCTGCTTCGAACAGAGACGAAATGGAATTCTTCGAGGTTTGGAAAATGTTATTTTCGAT  
GATTCATTTCGTATTACTTTCCTTATGTAATCTTTTATCATTAAATTTCTTGAGTATCGATTAAAT  
CCAAAGAAATTTCTCATATTACGATATTATATGATCCTGAAAATTATAGTATTTGGATTATT  
ATTTTATAATAATAGTTAATAATTAATTGAATATTCATTAAATTTAAATTTGTAAATATTGC  
ATTAATTTCGATTAGATTATTGTCTGAATATTGATATGAAATAGATAATTGTTATAATTTTGTTA  
TTTTCTTTTTTATTATACATAATTTGAAAAGATTGAAATTTATTTATTTCGACGATACCATTAGA  
TTATCCGTCTATTTCGCCATATACTTTATTTCTTTTTCGCTTTTGGTTTTGCTTCAAAAACCTCT  
CAGCTTCATTACGATGATCGATTTTCGATTCTTCTCTCTCTCTATCGGTTTCCCATTTAG  
TTCTTCGACTTTTTCCATCCCATTTTCCCAAGTTTATTCTCTCTCTATTTTCTTTCATGACAACA  
CTTGCCACATAATTCCACTGGATCTCTCTTCAAAAATATTTCAAAACTTATTCCTGTAATATTCA  
AACGCAAAAAAATAAATAAATAAATAAATAAATAAATAAAGGAAAACGTGTATTATAA  
TTCTAATATATTTTCGAAAAGAATCGAAGGAAAATATGAAATATAAAATGAGAGAGAAAA  
AAAGGAGAAATAGACAACCTATCGATTTCATCGTCAATTCCAATCGAGCAAAAATTGGCTAC  
CGCGATCGCGAGAAATAGAAAAAAGAAAAAAGAAAAAATTGGACCACAAAAAACCCGTGAT  
AGCGGATGAGATAAAAGCGGAAGTACGGCGAAAGCGCGCGAAAAGGATTTCTCGATGGTT  
CGATCGTTCGTGGTCAATCCGACATATTTCTATAGTTCGTAAGATTTCGTTACGAAGGAGAA  
AAAAGAAGGGCAAAAAAAGAAAAAAGAAATAAGTTAGTAATTTGGAAGAAATG  
ATAAAAGAGAAAAAAGAAAAAAGAAAAAAGAAAAAAGAAAAAATGAAACCCGCGTGGATA  
TATATATATGTATACCTATATATATATAACCTACATACAGACAACAGTTTAATGAGGAACA  
GTGAGGATAATAATGATAATGTTATTATTATTATGATTACTATTATTACTATTATTATTATTG  
ATTATTATTATTATGAATTATTATTATTACTATATTGCTACTAATTACTACTATTACCATTAAAC  
TATTACCATTACTAAAAGATTAACGACACTAACTGGAAGTATTACACCGATTATACATAA  
ACTTAATTATACATATATATATATATATATATATATTATAAATATATACATAGTAGCGATAAAA  
GATCGATAGGCGTCGAAATCGAATGGAGAGTTTGTGCGATTATTATTACTACCGTTGTAACCG  
CTTGAAGTAGCCTTAATAATTGTAATTAACGAACGCACGCGTGAGATATTAATAAAAAA  
AAAAACTGCGTAATATCTTATTGGTTGGTGTGAGGAGATTGCGTATTACCTCGTTTTAATCTT  
GTTTTCTAAATATTTATTTTTTCTTCTCTTCTTTTCCAATGATTAAAAGTTTTGAAAGAAGT  
CGTCAAGTAGAATTATAAACACTTCTACGAAGAATTTTATTAAATAACAATTTTTCTCTTGC  
ACGGTATCCTATTTCCATGCTGCTCGTATTGGTCAATTAATAATCATTTCGTCTTAGTCAATTA  
CCACGAGTAGAGATTTACACGAGTTGAATTGCTATGAGAGATAAATTTAAAACGGACTTTT  
TAATCAAAATAAATAATTTTCCCAACTTTCTCTGATTCACGAATTTTTCTCTTTTTTTTTGTTT  
CCCCTTCGCTAAATCAAATAATGGAAAACAAGAATTAAATATTTATTAACTTAATTTTTAT  
CGTTTTTCGATATAGACAATCGAGATTAACGAGAAATATTTCGTTCTCTCTCAGGTAAACCA  
ACATCTGAAATTCCTAAATTGTAGAATGATTCATCCTAGCCGTAAGCGAGTCACAAATAG  
TAGAGATGATAATCTACTTTACCTGTTTCACGAATGAAAGCAATGAAAATAATAAAAAA  
AAAAAAGAAAAAATATCACGAAGGTAGCATACAGAAATTATTAGCGATTATATACC  
TGTTCTTCTGAGATTAGGCGAAGAGATGATTTATCTAAAGTGAAAATTAGCTCGAGTCTAGC  
GTAAATGATACTTAAACACTTAACCTGTTTCCCGTCACGGATGTCAACCGATCGATTAAACAT  
TGTTATTGTTGGACGAATGTTTCGAGGTAGAAATTATCCAAATTCGAATAATTTTTCAATTT  
TTTTAAAATAATGATAGAAATCGATTTCGAATGTGGATTTTCGATGCAACGTTGTTAATTTCG  
AGACGGAGAGGTTAGGTTTTGATTACGTACTGCCATTACGTATTTGAATGGAAATCGATAA  
ATTGACAAATTTAATATAAACATTCTGTAATACAGTAGAGAAAATATATGTGGAAAATTTA

TAATACAATGTAATTTTAAAATTTTCTTGTATGATAAGAGCTTATATAATGAAAATATATA  
 TAATAGTATTCGTGAAATATATATTTGATGAAAACATCTACAATAGTATTTTCAATATTTAA  
 TGACACTAGTGTGAAAATTTGTCAGGTGATCGTATCAATATTGGAAATTTGTCACATCACAG  
 GAACCGTATATTCGTACAAATATTTGAAATTTGTCACGATGTTACGATCAAAATGTCACAAT  
 GTTCGCCATGATAAAATTCAGCCATATGACAGCAAATAAATTAATCTTTGCATTTTACTAGT  
 CATCTTACAATTTCTTCTATATAACTGTTCTTATATCTAATATAATAAAAAGGGGAGGGAAAA  
 ATCCCAAATTGAACAACGACACGAATCTATTTATATTAATACTTTTCATTATTGAATCAAATA  
 GAAATAAGTTGCTTAAGATTCCAAATCTCCACGAATAATAATCTATGAGTTCTAATCTATAA  
 ATCTATTCTAATTTAATAAATCAAGATTCTATTAATTTAATCAAGTAGAAAAAATGTTTCAT  
 CAAAAATCCATGAAGAATCGAATTCGATATTCCACACCACGAACATTATATAATCCCGTTT  
 TAAATTGAATAAAAAATATTTGTTAAAAGCTACAATTGTTGCGGATCACTTCGTTCAAACCTC  
 GCTTACACTTTATCCATGTATTTTTATAACACAAAAGTGACAAAGGTGGCGCTTGTGTCCACG  
 TGGATACGCAATCATTGTGGCTCTATCTACCTTCCAAATTTTCATAATCTCGATCTTCGATTG  
 TTCGTACATACATACATATACGATTTAAATTGCAAAAAAAAAAAAAAAAAAATAACAAAAA  
 TAATTTTAAAGCAAAAAAATTTTAAAGCAATTCTACCTCGAATCATTCCGTATTATATCCAT  
 ATCAATAAAAAAATATATAAATAAAAAAAAAAAGAACGAAGGATTATTGAATATCGAAGTT  
 TTATCAGGACGCACACAAGCAAAAAAAGAGCGAAAAAAAACCATGACTTTCGGATAATAT  
 ATTAACAAGTTATATATTAACGATACTATAATTCTAGGCGACTTCCTTAGCGTGTAAGATTT  
 TATTATATTCAACAAGGAACGCTCGATAATAAATCCGACATTGTTCCAAGCTCCTAAATAA  
 ATGAGTGAAGATTATTAACAAAAAAAAAAAAACAGAATAAACGAAAAAAGAAAAAAG  
 AAAAAGGATAAAAAAGAAAAGTTTCTACATCGATTATCGGTTATCGAATAAAGATCGATAA  
 GTGGATACGTGATTTCCGTGCGAGAAAAGTGTTAGAAAAGTGAGTATAGATGGCGTTTC  
 AACGTACAGCGTAACATTTTACATTTGCTTCGAGCACTATTTCAATAGATACATTATTAAG  
 AAGTTCGTGAGAGAAAAGATAAAAAAAAAAACGTCTAAACGAGAAAATTGTCTATTTTTTT  
 TCTTCCTGCATTGATTTGTAATGATGAATGTGAAAGTTTATTTGTTTATGATATAGTTGAGTG  
 AATTTTACGCATATATATGATATGATTTGTATGAAGAAGTTTATTTGTTTATTTTAA  
 TTTTGTATTGATCATAGAAATTTAAAAGTTAACTTGGTAGGATAATAAAAAGTGATTTTTT  
 GATTTTCTATTGAATTATTATTTTTTTATCTATAAGTTGAGAATATGTTTGAAATAATTTCATGC  
 AAGAG

388. >MSTRG.8241.1 Gene=MSTRG.8241

CGCTCTGGCAAACGGATCGAGATTTTATGTTCTGCGTATATAACGTGCTTTTGACGAATACC  
 TTTCTATTTGTAAATTTCCAGTTTCCTTTCGTGTGAATGCCGCTCCGTGAAGCGTTTAATGTAT  
 TCCTCTTTTACATCGATCCCTGATGTACATTTCGATAGCAGAGCACCGTGCGGTTCGTAACGGC  
 GACACGAAGAAAGCGCAATGGCCGACCGCTGCACCTCTGCTGGTAGCTTCGATCCTTCCTG  
 GCCACGAGGACTTTGTACACACTTGATCGTTCAGGGATCGACACGCGCGCACGATACGCCT  
 TTTCCGAATCCCTGAGACCGTTAAGATCCGTGGATATTTTTCTTCCGTTTCACGAACGCAGCT  
 AGGGACGGTTTCGTACTGTCCGATCGTATGAACCCGCTGCCACTCGCACCAGACCGCCACGC  
 ACCGTCCCGCCCGCTGGAT

389. >MSTRG.8247.1 Gene=MSTRG.8247

TTCTTAAGTTTGGATTGTGCTTTCACAAAGCAAGAGATAGATTCTGAAGGAGCTCGTGCTTTC  
 GAGCACATAGTTTACGAGTTTCGATCGCAGTATCTGGTTTCAGCGAGTGTTATGTGAGTTGGC

GTAGTGGCGAAAAAGAGCTTAAAGTGAAAGGAAAAATCGCATGAAGAGGCAGAAATTGA  
 CGGGCGCTGCTTGACGGATAATAATATCAGTTTTTAAAATAGAATGAACATCGTTTAGTGC  
 GCGTACATATACAGACACGTACGAGATATTGCTACAAAGTTAATTTACGTTTTACGAACA  
 TATATGTACACGCGCGTGCAGGGTACGAATACATATAGTTTCGCTGTGCAACG  
 GTGATATATTGTGAAAAATCCGTGTGGAGCAGCGAAAAACAACTCGTGTCCGCCATCT  
 TGTGCCTCTCCAGCTACGTTGAAAGGAAAGTGAGAGAATTTCGGACCGACGTGTGTGATTTT  
 ATTCGGTGAGAAAAAAGAGTGTAAGTAGAGGTGACCAACGGTCACCGAATGTGGTCAAAA  
 TTGCAAAAAACACGAATAGGGAGGACTGCGAGAGAACTCAAAGAAAGCGAGACGAGGTA  
 GCATTGCGCTCATAGGAGGTTCTGAGGATACCCACCAAGTTTATTCTCCGCGTTCCCCCT  
 ACCCTTTTGGCCTGGATCCCGAGATTATTGCGCAGTTAGAAAATTCATTGAATACAAACATC  
 GTCAAAAACTTCGTTGCATCTTTGGAAAGTGACCCGCGGACATTATACGACGGGTGGTTG  
 ACTTTGTGAGTGATACGAAATTATTATAAAGCCATGACGAATTCGGTACCGAAATTGAAAA  
 ACAAGGTAGACCGGCAGGGTTCGCCAAATGTCCGCATTGATCGACATCATCACCGTTCGAT  
 AATTACACTCAAACCGCCGCGGTATGTCCACATGAGTGGGAGATCTCATGGCAGAAAGTTCA  
 ACCGG  
 CAGATTAAGCTGCAGCCACACGGTCTTCAAAAGGTTTCGAGAAATTCACCGTTGCGGTAT  
 GAATATAGTCCGCGCGGCAGTCCAACAAACAGTTTTTATGCGGGTGCAAAGTTTTCTGAAC  
 CGCCATCTCCTGCGAGCCTTCCGAAACCACCGAGCCATTGGACTACGAGACTGATGAGCAG  
 TTGTCAGCAATCCGACAGGATTTGCGATATTTCAAATCATCTGAAGATGATGTTAAACGTCC  
 AAGCCTGATATATAAAGACCAACAGACCGCTAAAAACGGTTACCAGCTCCTAAAAACAAA  
 GAGACAGGAAAAGATTCTACAAAGTATAATAACTGTACTTTTCTCAAGGCTGAAATATTTT  
 AAGTACCTGAATTATATGCATTGTTCTGCATTTCAATTGTGATATTGTTGGATTCTTTTTTTCTG  
 CTGTATTGTAGGTGTGACTTCAGTATTTTTCCAACCTAAGATGGCGGA

390. >MSTRG.8252.1 Gene=MSTRG.8252

CCAACGCCATCGCCAAGTTAAAGTGCGCAAAATCCAATATTGCGCGTTTTAGAGTCAAGCA  
 CTTTCCTCATTCCCGAAGTAATTAATCGAGAACCGAAGCAATGTCTAGTATATGTTATTTAG  
 TGTACCTGTTGAGAGAGTTGATGGTGCGCCGTGTAATGAGTAGTATGGACGGGTGGTGGTG  
 GCGCATGAGCATGATGAAGAGCCGCCACAGGACCTCCGGTCGGTGTGGGATATCCTCTGG  
 ATGTTGCGCCAACTATCGAACCAACCAAACTGTGACCTGGATGGGTGGGTGAGCTGCTGA  
 ATAGTGACTATGATGCGTAACCTAT

391. >MSTRG.8277.7 Gene=MSTRG.8277

CAATTATTTTAGAATTACAATTCATTTTTTTACGTTATTTTTCAAGAGAAAGAAAAACAAG  
 AAGAAGCATACATTAGACAGAAATATTCGTTTTTCATTGCGTACGACAAACAAGATTGATAA  
 AAAAATTAGAGGATCTATTTCTCCTTTTTTATCTTTTTTTTTCTTTTTGCTTTTAGGCATCCT  
 CAATGTGCATAAATTGTGTTATCGGCGTTTTAAATTTTCTTAAGTATAAATTTGTAGCAGTATC  
 AAAATAGTAAAAATGGTGCATATGAAGACCATGAGCACGGTAGGACCAAAATGAAACG  
 GACTGAGCGGCGTAGGCCGCTGGGCTCTTGTCATACAACCTGTTACCAGACTCGATCGAG  
 TCGAACAAAGGTCGTTTCAAGATTGTGGATCGTTGTTCCCGATGATGCTGTACCTTACCACC  
 GCTGGAACCTCTCTTCTAGTTTTACTGGTGCCAGAAAAGCATAAACAACCGGACTGATTAC  
 GATTTCTTTTTAACGTTGGCTTATTCTCCCGATCTCGTTCCGCTAAACATTTTTGATAGTAATC  
 GTAGTCTTTTAAATACCACACCGGAGGCCATCGATGCTCATTTAAATATTCTTGATTCTCTG

GATGTAGAAGACGCACACTTCGTGGAGACATTTTGCACAATTTGTTATAATTCACGCATAA  
GTAATTCATACACCAGTCGGCCAGTTGATCGGCATTATGTAACCTGCACGGTTCAGTAATC  
TCAGACAGTTCTCCACGGCCTCGTTTCCCTCGTTCCCAGACAATCTCTCGAGATCTTCGATTA  
CTCTGCTCTCGACCAAGTTCAGTAGTCGTGGTAAGCAGAGACGATTTGCCAATTCTAAGAG  
GTTCAAACATCTGGCAGAGGAAATTGCTGGCACTTCATCCGTATAGAGATAACAAAGCAGT  
TTATGAAACGTGTATTTCGCGTACACCAGGAAACACTATTACTTTTTCGCGCTGCTTTCACGAAA  
ATCACCGGAGAACATAGCTTTTCATCACATCACATCGGGCAGTGAGAATCGCTTTATGGGCT  
GGAACACTTCCATCATCTAATTCAAATGTTACATCGGCGAAAAGTCCTTGCTCTAGACAAA  
TATCTTCTAAACGTTGCCTCACTACCTGTTTGTAGCGATTATTAAGATCATTATTAAATTGAT  
CTCTAGTTTGTAGAGTTCCAAGCACCATCAACAATTGCGGAAGCTCCAAGAATTCCGCTGC  
CTGTCTAATTTCTTGATGATCATGATACCGTTTATCCAAGCTGCCCCGTATAAATGAACTGCA  
AACATTGCTGCATTGCCTGAGGCGTAATTAAGTACAGCGTAACCACTGTCGTTGATTGC  
TGCATTCCGTTTGTATTCTCAGTCAAACATACACGAATGTTTTGGAAGGCAGGATGATTAAG  
ATCTCTGGTAGTACCAGTCGGTTTCTTTTGTTGTCCATAGTGGGCAGTACTTGAAAGCTCG  
AACGTCGTTCAATTGTTCCCAAACTTTTGCAGGTTTTGATTGATCGATACGAATCAGGCAC  
TCGGTGTATCGTTAAAATCACCGACCGTTGCTTCACCAAACGTAATTACCATGCTAGATTC  
GCTGGAACCTCGAGGTGTTTGCTCTTGAACAAGTTCATAGAGAAAAGTCGATGAAATGCA  
GGCGATGCAGCGGCTAAAAGACACCTATGAGCGGAAAACGTGCAGTTTCCGGCTATTAAA  
GTCACGTCAGTGTGAACAGGCTTTGTCCATAGTGTCTTCATATTCTCTTCATAAGTGCTTGCA  
GCTAGACACACTTCCGGTGGAACAGGTTTCCGGTGACAAAATGGTGCCTGAAGCAGAGGT  
CTCTGCACCTCTTCAAGTTCGTATCCAAAATCGTTGCTGACGCCTCGCAATTAAGGCAGC  
ACGTATCGAATTTTCGAACACTTCATTAACACCGTAATACGTGAAGACACTGGTCTCGTAAT  
AACAAACGCCAAGTTCACGTGCAACGGCTCGAGCTTGATCAGGCATCACCAGATCGCTCTT  
TCTCGTGGCTCTCACGAACGGACTTCGATCACGAAAATAGCTCAAATAAGTTTCATCTCGAT  
ACATGTAACGCAAATCGTTCTTGATCCCACTAACAGCACGGGGGTCTGAGGGCAGAACC  
GTCGTATCTCTGGGTACCACATCGCCTTGCAATTCCGTAGCGAAACGGGATTGGTTATGGAG  
AAACATAGTAGCACGACGTCTGATCTGCCGTACGCGAAACGTCGATCTTTTTTCGTGATCAC  
CAAATGTGTCCCAAAGTCGCAGGGAGACATTACATTGTCGACTACTTCCCAGGATCGTTC  
CAAGACGTCCTTGATATCCTGTACTGGTCGATGGCCCAAACGGTGGGCACGTGAGTTGTC  
AAAAGTTGCGAAAGTGACACGTGTTTGTGTCAGGCCCTTGCGCATATCAGCCTGGTCTTTCC  
AACTGCCGTGTACCGACGACCACACACTTGACCAGTTCCTGATGCGGCTGCTCATTGTCCA  
TCACCGACAATCACCCCTTCTCATCCAATACCCACCCACGTGCCAGGTGCTTTAAACAC  
GCGGCTACCTCCGTTGCTACCGTACCGCCGATCGAATGGCGCAATGTCCACATCCGATCTTC  
ACAGAATCAAAGATGATGCCGCGCGTCGATCCTCGCGGTCCCTTTCTCAAGCTAACAAATGC  
AAATTAGAAGATGATTGATTTATTTGACAAACGATTCTGATACTGGCAGTGCTCTTGTTTTTA  
TTTTTCTGTCTTCCAATATATATTTCACTCAAGTATCACGCCAACAAATCGGCACAGAAAAAG  
ATGTTTCATCAAATGTACACTATCCAATTAATACGAACATTCACGCCGGTTTCTTCGAGCAC  
AATGAAACGCGAGAACATGCGACAGTTTCGACGCCCGTACCGTCTATGTCCGCAACGTATT  
ACATATAACCACTTTGCATAGATAAAACGAATCTTATAAATGCACGAAATCACGTCTATTTA  
CACGCACTGATATTTAATGAGACAGTGTCTCTGTAAAGAAAGGCGAGTCCATAAACTCGT  
GTTCCACTAACATTCACGCGAGTTTATAATACGAAATGAAAAACGGGACGAACGAAGTGA  
CAAAAGTGAGGTTACGTAGGTTCAAGCTCGATGATACAAGCCTTATTGAGACGCAGTCTGA  
TTAGTCGATAGTTTTACCGCAAGTTTCTTTCTTTTCTTCTGTCTCTATCGTCTTTCGGATCGT

GACAATGGACTAGAAGCTGCAGCGGCACGCTGCACACCCAGGACGCACCACGCAAGTTCC  
AGCTGACGTCCTGGCGAATCGAAGTGGGGAGCAGATGAAGCAGTCGAGCGTGGTAAACAG  
CCCTCATGGATTTAGATCGGCCCTCGTCGTTTCGACGGTCCATCACGTTTAGTTTCGTCTTAATA  
TTGATATTTGGTTGAGCAATCTGTGATACTTTTTTTTTCTTTTTAAATATAACACGTATTGAAA  
TTTAACCAAACCTTTTTTTAATAATTTAGAGATTATGAAGATTGGAATTTTCGTGAGATTCTGAT  
TGGAAAACAAAATGGGATTAAATCTGGATATCTTTTATAATCCTTTGGCTAATATGGCACCT  
ATAAATACATATTGAAAAGATATTAAAGATGGAGATTTATGCTTTGCATACAGTAATTACT  
ATTATATTAGAATTTATTTATTTTTATTTCCAAACGAGTTTCAAAGAGTTTCTTAAAGATTA  
AAGAAGATTAATTATCTCAAATTATTCAAAAATAAATAAAAAAGATTATGCACTATTATTCA  
ACGAAATTTTATTTTGATAAGAAAATGGAATAATAATTTCAAGCAAATAGGAAATGCATGA  
TAATTGATGATAGTTAATATCCTAGAAATAGACTCTTAGAAAAATATCCCATCATTTTCGACA  
ATGCACATGTGCACGTTCAAAGGATCAACTCGATTGTTGACGACGAATTCGCTATCCCTCTA  
AATCAGCTGGAGGAAGAGGGAATCAAAGCGCCAGGAAGGGAGAATCATCGAGACAGGAA  
AGAAGGGAAATATAGGCATTGAGAAGAGTTCAAGCGAGAGAAAACAACGAGCAATCGAC  
CAATCATGCGACATTGAATGAACTCGTCTCTGACTTCGACATGTCTTACTTCCTACCCTTGG  
CACAACCTACCCCATCATAATCACCCTTTTATCTCTTTCTTTCTTTATTTATCTGTTTTAGAGAG  
ATTTTGAATCATGTGACCATGATCATAATAATTAGCATTTAATTGTAATTATTACAAGATTT  
TAAAGTATGATAATGATTTATCTGATGATACAACGTTGCTTGTGAAATGCTTAGTATATTTTT  
TTTACTTGATATTCGCACGGATTTAATTTTTGATAAATTAAGATAACAAATATGCGGTTATTG  
TCTTTTAAGAATTTAGATTTTTTTCAAATCTAAAATCTATTTTACAAAATATAATTTATTCTA  
TATTCACCTATTAAAATTAATTTTTCCATTTTTTTGAATTTAAAAACAAGTATTAACGAGTCAA  
TTCTTTTGAATTGTGAAAAAAGGAAGGTGATTTGACTTTGATCATCGAGATTATAGGACTTC  
GATAAAGGGATATCAACCGGCAGATTACACAAAAAAGTTCGAGATGTGGAAT  
AAAAAGCGGTTGGCATCTGTTTCACGCGCATGCTAGCCTCGCTCGTGACGTCAGAGGGTGA  
AAAATCAATCCACCCTTGTACAGTGCGGCAAGATAGGATTGTATATCTGGCGGCCACAGTC  
GCCATCATTAATTAACCGAATTAATTGTACTTGTCTAATCGATCGCCCTTGGGCCAATTTTC  
AGTTTTAGAATTCTAACGATCGATGATGTTTCGAAGATTTTTCTTGGATTCTTGGAAATGAAC  
TTTTAAAAGGAAGATGCAGAAATGATTACGTATTGAAATATTTGACAGTATAAAGAATTTG  
TTAAATATTGTAAAGAGACGATGATAGAGAATCTTAATATAGAAAGGATAACTGCTTAAAC  
TAGAAAAGGAAAAAGAAAAAATGGATAACTTAATTGTTACTTGATGCAATGTGGCAAAAA  
GATTTCCAAGTATGAAGGATTGAAATAGTATTTCTGCTTACATTTGTAAATTCATTTTATGAA  
AGTTCTGCAATGAAATTGGCAAAGAGTCTGGGAACTATGGTTACATAATAG

392. >MSTRG.8277.8 Gene=MSTRG.8277

GAAAAAGATGTTTCATCAAATGTACACTATCCAATTAATACGAACATTCACGCCGGTTTCTT  
CGAGCACAATGAAACGCGAGAACATGCGACAGTTTCGACGCCCGTACCGTCTATGTCCGC  
AACGTATTACATATACCACTTTGCATAGATAAAACGAATCTTATAAATGCACGAAATCACG  
TCTATTTACACGCACTGATATTTAATGAGACAGTGTCTCTGTAAAGAAAGGCGAGTCCATA  
AACTCGTGTTCCTAACATTACGCGAGTTTATAATACGAAATGAAAAACGGGACGAAC  
GAAGTGACAAAAGTGAGGTTACGTAGGTTCAAGCTCGATGATACAAGCCTTATTGAGACGC  
AGTCTGATTAGTCGATAGTTTTACCGCAAGTTTCTTTCTTTCTTCTGTCTCTATCGTCTTTC  
GGATCGTGACAATGGACTAGAAGCTGCAGCGGCACGCTGCACACCCAGGACGCACCACGC  
AAGTTCCAGCTGACGTCTGGCGAATCGAAGTGGGGAGCAGATGAAGCAGTCGAGCGTGG

TAAACAGCCCTCATGGATTTAGATCGGCCCTCGTCGTTGACGGTCCATCACGTTTAGTTCG  
TCTTAATATTGATATTTGGTTGAGCAATCTGTGATACTTTTTTTTTCTTTTTAAATATAACACG  
TATTGAAATTTAACCAAACCTTTTTTAAATAATTTAGAGATTATGAAGATTGGAATTCGTGA  
GATTCTGATTGGAAAACAAAATGGGATTAAATCTGGATATCTTTTATAATCCTTTGGCTAAT  
ATGGCACCTATAAATACATATTGAAAAGATATTAAGATGGAGATTTATGCTTTGCATACA  
GTAATTACTATTATATTAGAATTTATTTATTTTTATTTCCAAACGAGTTTCAAAGAGTTTCTT  
AGAAATAGACTCTTAGAAAAATATCCCATCATTTCGACAATGCACATGTGCACGTTCAAAG  
GATCAACTCGATTGTTGACGACGAATTCGCTATCCCTCTAAATCAGCTGGAGGAAGAGGGA  
ATCAAAGCGCCAGGAAGGGAGAATCATCGAGACAGGAAAGAAGGGAAATATAGGCATTG  
AGAAGAGTTCAAGCGAGAGAAAACAACGAGCAATCGACCAATCATGCGACATTGAATGA  
ACTCGTCTCTGACTTCGACATGTCTTACTTCCTACCCTTGGCACAACCTACCCCATCATAATCA  
CCCTTTTATCTCTTTCTTTCTTTATTTATCTGTTTTAGAGAGATTTTGAATCATGTGACCATG  
ATCATAATAATTAGCATTTAATTGTAATTATTACAAGATTTTAAAGTATGATAATGATTTATC  
TGATGATACAACGTTGCTTGTGAAATGCTTAGTATATTTTTTTTACTTGATATTCGCACGGAT  
TTAATTTTTGATAAATTAAGATAACAAATATGCGGTTATTGTCTTTTAAGAATTTAGATTTTT  
TTCAAATCTAAAATTCTATTTTACAAAATATAATTTATTCTATATTCATTATTAAAATTAAT  
TTTTCCATTTTTTGAATTTAAAAACAAGTATTAACGAGTCAATTCTTTCGAATTGTGAAAAA  
AGGAAGGTGATTTGACTTTGATCATCGAGATTATAGGACTTCGATAAAGGGATATCAACCG  
GCAGATTACACAAAAAAAAAAAAAGTCGAGATGTGGAATAAAAAAGCGGTTGGCATCTGT  
TTCACGCGCATGCTAGCCTCGCTCGTGACGTCAGAGGGTGAAAAATCAATCCACCCTTGTA  
CAGTGCGGCAAGATAGGATTGTATATCTGGCGGCCACAGTCGCCATCATTAAATTAACCGA  
ATTAATTGTACTTGTCTAATCGATCGCCCTTGGGCCAATTTTCAGTTTTAGAATTCTAACGAT  
CGATGATGTTTCGAAGATTTTTCTTGGATTTCTTGAATGAACTTTTAAAGGAAGATGCAG  
AAATGATTACGTATTGAAATATTTGACAGTATAAAGAATTTGTTAAATATTGTAAAGAGAC  
GATGATAGAGAATCTTAATATAGAAAGGATAACTGCTTAACTAGAAAAAGGAAAAAGAA  
AAAATGGATAACTTAATTGTTACTTGATGCAATGTGGCAAAAAGATTTCCAAGTATGAAGG  
ATTGAAATAGTATTTCTGCTTACATTTGTAAATTCATTTTATGAAAGTTCTGCAATGAAATTG  
GCAAAGAGTCTGGGAACCTATGGTTACAT

393. >MSTRG.8307.1 Gene=MSTRG.8307

AAGTTCTACGAGCGTGTAACCGAGGCAAAGTATTATTTGAAAAAGAGAAACGATGGTTC  
CCTTAACGAAGGGTCGTCGGTTAAGAGTTAGAGAATAGGGAAAAGACGAAGGGAACCTGA  
AGCGAGGTGGCACAGTATGAAAGCAGTTTACTTCGCTCGAGACGAGAGCAACTCAAAGTT  
CTTGAAACCGTTGAAACAATACTTTAACCCTTTGTGTACTTACGCTCTTCGAGCAGGTTGC  
TCCTCGTAAATTAGTATAAACTGTTTTGTGTGAAAAGAAAAATAAAAAAAAAAAGAAAGAA  
AGAAAAGCAAGGGTGGAACAAGGAAAGCTGGGTTTCGGTTGAACTTATCGTTAAAAAA  
CGAACATAAAAATGGCACAGCTTTCCTCGTCACCCAAGGGGTACTGTGCCGGAACGCGTTC  
CCGTTTTTTTACATGGCGGGGATCCCCAGGAGGCCTACACCATGCCACACGATATTTCCGTG  
TGGAACAAATCAAAGAAACAGGGAAAGAGAAAAACAAAAAAAAAAATAAAGGCAAGATA  
TATATTATATCGTGGTGTTTGAAAAATAATAAAGAGATCGAGAAGAGAAGTGTATAATCCT  
TAAGCCATCAGTCTCGTGGATGTATATCAAATCTCGTAAGAAGTTCATCTTTCTGATTTCGA  
AGTTCTTAGATAAATTAATTGTAGTCGTGCGGTCGATTTCCGGAGCGAGGGACGTTTGAACG  
TTATCGCAATGACCCACGAATACCGATCGTGTTTGCAAACCTCCATTTACGAGGCGAAAGTG

TTTCTCGAACCACACTAATGATCCGTCGTCGCGTATTTTTCTGCTCGCGTTCGATTACGTGC  
 CCACGTGCAACTGCACTTTCTACGGCGTCCTAATCGGGGAATGGACCGATCGAACGAGTCG  
 TTTAATCGTTCCACCGATTTACTTTTGTCCATCGAATAGATTATCGGTATTCGAAGAGGCCA  
 CGCGATAACGATACGCTCTTCGAGGCGTCGGGATATATCATCTCCCTTTGATCGAAGCGAA  
 GAATGAATTTTCTAAAACGCATGAAAAATGAGAAAACATCGAATGAATTTAAAGAGAGAA  
 AGAGAGAAAAAATAAGAAAGAAAAATTTAGAAAAATCGATATTAATTTTAAACGACGCCT  
 CGATAGAGCTTTTTTCGAAAAGGGGTGAAAAACACGGAAATCGTCCGTGTGACCACGGGAT  
 GGGTGTGAACTTATCGCTAAACACCGGCATACGCACTATGCCGGTGCGTGGGTACCTTAT  
 ACGCTAATCCACTTAATCGACTACCTGCTTGTATACCTCTTCGATGGAACAGAGAGAAAGA  
 TCGGAAAAAACGGAGAAGAAGAGCCACTAACACGTTTCGAGGCCGAGGTGCGCGACACA  
 CCGATCACCGGAACTCAAAGAGGTGGCCACGTTACGGAAACAGGATCTTTTATACCCTGGA  
 AATTATTGATTTTCATCGGTCCGCCAGGCCGGTGGCACGTG

394. >MSTRG.8308.2 Gene=MSTRG.8308

CCTGTTTCCGTAACGTGGCCACCTCTTTGAGTTCCGGTGATCGGTGTGTCGCGCACCTCGGC  
 CTCGAACGTGTTAGTGGCTCTTCTTCTCCGTTTTTTTTCCGATCTTTCTCTGTTCATCGAAG  
 AGGTATACAAGCAGGTAGTCGATTAAGTGGATTAGCGTATAAGGTACCCACGCACCGGCA  
 TAGTGCGTATGCCGGTGTTTAGCGATAAGTTTCACACCCATCCCGTGGTCACACGGACGATT  
 TCCGTGTTTTTACCCCTTTTCGAAAAACGTATCGTTATCGCGTGGCCTCTTCGAATACCGAT  
 AATCTATTCGATGGACAAAAGTAAATCGGTGGAACGATTAAACGACTCGTTCGATCGGTCC  
 ATTCCCCGATTAGGACGCCGTAGAAAGTGCAGTTGCACGTGGGCACGTAATCGAACGCGA  
 GCAGGAAAAATACGCGACGACGGATCATTAGTGTGGTTCGAGAAACACTTTTCGCCTCGTAA  
 ATGGAGTTTGCAAACACGATCGGTATTCTGTGGGTCAATTGCGATAACGTTCAAACGTCCCTC  
 GCTCCGGAAATCGACCGCACGACTACAATTAATTTATCTAAGAACTTCGAAATCAGAAAGA  
 TGAATTTCTTACGAGATTTGATATACATCCACGAGACTGATGGCTTAAGGATTATACACTTC  
 TCTTCTCGATCTCTTTATTATTTTCAAACACCACGATATAATATATATCTTGCCTTTATTTTT  
 TTTTGTCTTCTCTTCCCTGTTTCTTTGATTTGTTCCACACGGAAATATCGTGTGGCATGGTG  
 TAGGCCTCCTGGGGATCCCCGCCATGTAAAAAACGGGAACGCG

395. >MSTRG.8314.1 Gene=MSTRG.8314

GAATCGCAAGAGGACCTGTAGTCGTCTTCTCGAGGACATCGCGTCCACGTCTATGATCTGA  
 AGAAAAATAAATTGTTTCGTCCGATCAGGGATTAGGGAAAAAGAAGGAAAAAGTGAAATTGGG  
 TTGGAAATTGATTCTGAAGGAAGTTCGAATTAGAAAACACAACCGTGATAATAATTTTCCAG  
 TAATCAAAGAACACTTATGTGTCGATGAGGTGCAAGATTTTGGATTGTCAAGGAAATTCCC  
 CAACATTCTTACCCAGTGTTAGGCTCGCTAAAAATCTTCGAACTCGCAAAGGGAGTCGACG  
 TGGTAACGCTGGAAATCGTCTAGAATTGTTGGTTCTGGTTCATTTGCATCACGTGCCATAAA  
 ATAAAAAAGAGATCAGTGAATCTGATAGTGTGAGAAATTAAAGTGAAAGTGCTGCCGTA  
 TCGGTTTTGATTGGCTTAAATCGACAGAAAAGCTAGAAGTAGAAGGAAGATCGAACAAT  
 TTTCATTTAGAAAAGGGAAACGAAAAAGAGGTTCAAAAATGGTTCACACCGATATTCTCAT  
 CAAAGGGCCTTACGAAGATACGAGAAAGAACAAAAATGCATCGTCAGCACACCAGCAAC  
 AGCGACCTCAACAATCGGAGAACAAAGAATGACAAGTATGGCTCTTGGGGTCCAGTGTATA  
 AGAACAAACAAAATTTTCATCGACATGCATATTTGCTGATTACTGATAATGAGGTATAAATT  
 GAAAGATCGTATTGAGGATAATGAATAACTACGAATAAAAAAAGTTTTATATACATTTCT



CGCATCACTTTATCACTTTGATTTTCGACACCAAAGATTTTTACTCTTTGTTAAAATTTGATAA  
TTAGTAACAATAAAAAATGAATAGAAGTAATTAGAAGCAATCAAAACGCTTGAGATTGATT  
ATTCTTTAACCGATTGTTCAAAACAATTTCCATTGAAGAGGGAAAAAATGAATCTAATAAT  
CTCTGAAA

396. >MSTRG.8328.1 Gene=MSTRG.8328

ATTATAATATATTCTATATTTTTATTATGAAATAATAACTGGTTTTAATATTCAAACAATTTCG  
CGGAAAAGATTTCAGATTTTCATAATCAGAATTCTCTAGTATCTAATACTTAATACATTGAGA  
AAATGTCGTCTCTTGAAGCAGGTCCAAGACCAGTACAAGTATCTCCTTTAATTAAATTTTCT  
CGATGGACTTTCTTGTAACTGGAATTCTATATGGTGCTTATCATCAAAAAAGACTTAGTAA  
AAGAGAAAATGCTCTTCGTGAGCAAGAACTTAAAGAAAAACCTATTAGGGATGCAAAATT  
AGCAGAAGAGAAAAAGAAGTTATTGGAAGCTGAAGCAAAAATGATAGAAGAATGGTCAG  
GAATAAAAAAATAAAAAATAATACATTTTCAGTAGTATAAATGTGTATTTTTTTTTAAAATTA  
ATATTATATCTTTA

397. >MSTRG.8342.9 Gene=MSTRG.8342

GGTGGGCAGGCGATACGAGGAAAAGTTTATAGGTTTTACGTAAGCTTTTGAGTCGTTGGAG  
GATATTTAGCCGCGGCGACTCGTCCCGTACGGTCAAATCGAATCGGCGAAACGTCTCGGTT  
GGGTGGTGTGTGTTGTGATCGTGGGGAGAGAAAAACGGAGTGTGACGAATTCCAATCGAG  
ATCCATAATAAGTATGAGCTTGCACGATAAGTGATTTTTCTTCGTATATATTGTTGATCGTAT  
ATCGTAGGTGAGAAAGAAAATTTCTTCTTCTTCTTCTTTTTTTTTTCGTTTATATTTTTATAT  
ACGAGTGTCAATTGCACGTGATTTCTTCTTTTCGTGCTTTTATTCTATATATAGGTAAATGAA  
TCGAGAAAAGAAATTTATTTTTTAAATATATTGCTATTCAACAAATGGGATAGGAGATATTA  
TTCTTGGAAGTTTTTTTTTTCTTTTTTTTAAATCGTTTTGCAATATGATTTACCGTTATCGAAGT  
TTTTAAGGACGGTCCGTGGACATTGCTTTTAAACATTGCGAGGATGGCACGCAAACGCCATT  
ATTATTTCTGAGATAGCCTTGCTCGCATCGGCAACCTCCGGTCAACGACCACGTGCATTCTGA  
TTCTCGGGCAAATATACGATTCGGATGTGGAGCGTTGCAAGATGGCTCGCACAACGATCC  
ACATATGTACGGTTTTTTCATTTCTCCGCATCTTATGTTTTCTCGTTGTTTTGCGCGTCGACG  
TAAACAGCGAGGAGTGTAGCAATAAGCATAACGTAAGATGTAGCGGGACATTGGAATG  
TATTCTTCTTCAAAGCCGTTTTTCGCTTCTACTGTCCGAAG

398. >MSTRG.8351.1 Gene=MSTRG.8351

GCCGAATAAATGGAATATAAAGGCCGCGCGTTTTTCACAAATTTCAAAAAAGTAGTTACTT  
TTATTATTTTTCCGCTCGAGAACTGTGATAGAATATCCTGCTTCAAAAATGTCCCGTGCCA  
TACTCTTTGTCTCCTTGTCGTTGCTTATATCTGTATAAGCAACGTGAACGCTTGTGGACAAA  
ACGAACAATTTAAAGAATGCGGAGGTTGCGACCAAAGATGTGGAGTCGAAAGAATCGAAT  
GTCTCGAGGTGTGTCAACCCGCTGCGCTTGTATCAAAGGATTCATAAGGAATGCCGCAA  
CAAATGTGTCTTACCTAAACATTGTTAACATCCCTTGTTGCGAATCGATTGAAACAAATGTT  
ATTCTTCAAAATATAAGAATATAAGATATATAAGATATTCTTCAAATATAGGAGTGTTCTGA  
AAAAAATAAAATGTAATGATTAAACACGTGTAAATTTATTTTTATTTATTTCTTTTCTTTTTT  
TTTTTTTTTTTTTACATTTCGTAATATTTTACACGATTTGTGAGGCAAGGATAATACGTAAATTT  
GCATATATAATCCTTTCCAAAGATTTTTACGCATACTCGCGACTTATTTTCGAAAGATATTA  
ACCCGTGTTTGCGTTTATCGTGTGTTAAACGATGTATCGAGTACACGATAATGTAACGCGTT

TCTTTCGATTTCGTATGTACTTCGATGAATAACAAATGAATTAAGAAAACGAATAAAAGTTTT  
GAAACGATAGTTTATTATTTATTGTTTATATATATATATATATACATGTTTGTTTTGAATTAA  
AAGAAGATAACACTGCAAAGCAAACAAGAAAACAAAGAAACAAAAAAGCGAAAGAAA  
ACGAAAGAAAGCGAATTCCAATTAAACGGGGAATTTTAACAATTTTCTGGAAGGACACAT  
GCCCCTTCGCCATTTCTCAAGAATCCTTCCTGACACTGACAACCGATACGACATTGCATGGT  
ACAAATACGCGTTTTTGGCTGGGCACATGTGGGTGCGCACGCCGATCCACACGTATTGAAC  
ACCTCGTTTGGTCCACACTCCTCGCCAAATGAACTGGAGAAAATCGCCATAGCGGCGAGCA  
AAATGAAGATGATTCGAGACATATTTGATTTCGAGACTTTTTTCGAACGATCAACGACTGAAA  
CTACTAAACGTATCGAACTTCTCAGCTTTATATAGTGACCTTACGCCACGCTTGCACCAAGA  
CGAATTTTACTCCAACAA

399. >MSTRG.8401.1 Gene=MSTRG.8401

CACTAGCACATTTTTGCATAAGCTTAGCTTGTAATTTAAATTTTAGGATAGCTACTAACTCGT  
ACTCTTTTTTATATAATTACAAAAGCGAATAATCAAGCGTTATTCTTGGGCAACTATTGGT  
ATAAAAAAATACGTAAATTTTATCTCTATTTCAATCGTTTTGTAATGACAGGAAGAATAGTA  
AAAACACTCGTAAAGCCTTTGTCGATTGATTTGATTAACTACTAAATTGTCATAATGATGT  
TTCGCTGGCACCAGAACTCTGTGATTGAAGTGGATAATAATTTACTGCGCAGAATCATGCG  
CAGTTCAATATTGAAAAGACAAGATGGCGATACGGAAAAGGCATCGTGGGATACGCAATA  
AGAATGGCGTCGTTCAAAGTAATGAGAAAAATAAGAACGTTTCGTAAATAAAATGCCTGGT  
AAACGTTTCAAGGAATTTAGATTTTTACCGTTATGTTTTGTCATGGGTGGTGTGCTAGAATTC  
CTTATGATTCATTGGCATGTTGGAGAGGTTAACTTTTATAAAACGTATAAAAAGAGAAGAA  
TAGAAGAAGCAGTTGAACAGAGATTAAGAAAGAAATATATTAGTGAATAAATTAATTATAGC  
AAATATTGTCTTCAAATTAATGGACGAAAGTGAAATTTGTATCTATGAAATTAGTCTTCAGA  
ATAATGTTGATATAATTTATGAAGATACGAAGGATTTATGTAAAAACATATATGAAGTATA  
ATAAATTATTTTACAAATGTTTAAAGTACAATTTTGGCAGTTCTTCTTAACTTCTTTCATATCA  
CACACCACATTTATGCTTGTTTCATACCTGAGCAGCATGTCTTCCACCATAACCAACATTTG  
TTGTTCCAATTTTTTTAATCTGGATTGATATTTTTTCTTAGACTTCTCTAAAGTTTGTACCAAG  
GCTCTAAAAATAAAATTAGAAGGTAATTTTTTCGATCAATAAAATTAATTTTTTAAATCCA  
TGATTTAATTACCCATTGGCTCTTTTTAAATCGTTAATAAGCTCAGCTGATTGTTGATGCCTC  
AATTCAGAATTTTTATTAACCTTTATCTAAAGTAGAACTAATTCTTGCAATCGTTCTTTCAGT  
CTAGCCTCTCGACCTAATGCTTCTATTAATTCGGATTCCATGCCTTCACTCTCGTTATCGCTT  
AAACCTCGATCTTTATTCGTAGCCATTGCCAGCATGGCCTCTGTATCTCTGAGTTGACCCTG  
AAGATGTTCAATGGCGGCATGCTGAGCTGCAATTTGCGTATCACGTGCATTTAATTTCAATT  
CTATAGTAGCTCGTTCCTTTTCCAACAGAAAACTCGTGCTCGTAACTCTGCCTTATCCTCTC  
TCATAGCCATTAATTCCTGCATAAGTACTGCTGTTTCTAAATCTAATTTTCGAGCTTCGGCGA  
GAGAAATCGTGTTTTTCGAGTTTAGTGGCTCAGCGTGAACGCTTTCTAATTCACCACAGTT  
GATCTAACCATAGCTCGTTCCCCTTTCAGTCTGCTAATGTGTCTTCTAAGTCTTTGCTCATCTT  
CAACGCACCAAGTCACTTCGGATCTAAGGAACACGAAATCGGATCGTGAAAAATAGTGTA  
AATTTATCCATTATTGCTATTTTTTTTATATTTACTCGTCCGACAAAACATACTATCTTCCCA  
C

400. >MSTRG.8421.1 Gene=MSTRG.8421

GAACAGTTTATCGCTCAGTCGTCAGTCTGCAGTTGTGATGCGTGTGTCGTGCGCGTGTTTTTT  
 TTCCCTTTCCAAACAATTCTAACTCGTGAAATAAATGAATCGCGTGAGAAAAATATGAACA  
 TTTGTCATGAATTACTCGAGATCGTTTATCAATTTTAATAATCGTTCAGTGAATTAGATCACA  
 TTCTTCCACTTATTCTCTATGGCGTGGCGGATTTTAGAGAATGTTTGAAATTCTGATCAAATC  
 GAACGAATCACAGTTTCTTTATAGAAAGAATTTTTTATTATTGATATAATTATTCGACGAAC  
 ATGTGGGAAAGAATTGTGCAAGAGCGCAAGAAAAGCACGTGAAAAAGCATAAAACAACA  
 TGCATTATTTTACTCTATGTATATACATTCCATTCATATTCATTTCTGGTGACGGTTCGTATTT  
 CGATCCTTGAGATCGTTTCTTGTGATTACCGTGCATTTCTCTCTTCATCAACTATTTATTAAT  
 CAGTTGAACTTTAAATATTTTTTCGGAATCTATTTGAAATGAGAGTGTGGTGTACTATAAG  
 ATTTTCAAATATTCCAACGTTATTCGAAGATCATAATAAACATCAGATGACTGGAGACTA  
 TAATATTAATAAGTGTGAAAGAATATCAATGGACGCTAGTGTCAAATAGAAGTTAAAGGA  
 ATATGCACTGCGTCAAAGGAATTCAATATGGCTATCAATAAATTCATAACAACGGAGGACC  
 TGCGATACATCGGAAGTTAATCCTGTCTTGTTCATAAGTACTAGTGCCGCAGGAGTGACTAG  
 GTTGGGTAGAAATTACCATATCTCCTGCTGCTCAAGTGCTTATCAATGGGTCCGGACTCAC  
 ATCTATTTCTCAAATATGTATTGAGACTTTTTATCTAAAGTAAAATTTTGTGATAATACCT  
 AAAAATTCAAGATTGTAATTTGCGTATGTTAATGTAGTATTGCAATTTTACTCCATATTTAT  
 AATAATTTTTCTATACAAATATATTAGAAGTATAAATAAGTAAAAGAGAAAAAACACTAT  
 GCATAAATGTATTCAATACATGATAAAATATTGATATTGAAGAATAAAAAAAGTATTTATT  
 GGAGGTACTGGGATTTGAACCCAGGACTTTCAGCATGCGAAGCAGACACTCTACCACTGAG  
 TTACACCCCCAGTTGTATGTTGTGTGTTTTATATAAATTAATGGTACAATTTTATT

401. >MSTRG.8423.2 Gene=MSTRG.8423

ATTTAGGAGATAGTGTGGTTATGTTTGGCAGATGCGAACTTCTGTCAACATAGCAAGAAAA  
 TGGGCTTGTTTGGCAAATCTCCAGAAAAAAATCCGAAAGAAATGGTTAGAATCGAAATGA  
 ATAATAATATCTATTCGATGTTTATACGAAATCGTATTTTCAGGTTCAAGAATGGACACATAA  
 ATTAAGGAAAGAGGGTTATCAATTGGATAGACAGGTTAGAGCAATTCAACGAGAAGAAGA  
 TAAAATAAAACGTTCTTTGAAAGAAGCAGCGAAGAAAGGTGATAAAGATGTCTGTAAAT  
 TCTAGCAAAAGAAATAATACGTGCACGAAAAACTTGTAACAACTCTATACATCAAAG

402. >MSTRG.8436.1 Gene=MSTRG.8436

AAGACGAAAATTAATAGATAAGATAAAGCGAGGAAGAGAAAGTAAGATGTTTAAAGAGA  
 TGCAAAGAGAATTTGTTTACTTCCCGTTTTTCGACTCGAGTCCACTTAATGGTAGGTAAGTAA  
 CTTACTTTCCAGCCTATTCCCCCCTCCTCTCTCAACTTTTTTTACATTGCAGTTGCAG  
 ACCGCTGCCCCGATCTTCGAAACCCCGCTACTTGATCTCAGTCTGGTGCGCACCGCCACCGA  
 GTGAGGGTGTTTAAACGTTTTGTTTCGTTTCGAAACGACAAATCGACCTAGAGAGATCAACAG  
 GCAAAATGTTGAAATCAGCCTCGCCGCAATATCCCAACAGAGGATCCGATGCCCCGGTTCAT  
 CCGTTTGACCACGGATCAAGAAGCTGTCCTCCAGGAACAGTTCAATAGATGGCCGAGGGC  
 ACCTCATACAGCGGATATCGTCCTATTGGCGGCCGAGACAGGACTTTCTGAAGCCGATGTC  
 GAGGCCTGGTACTCTATCCGATTAGCACAGTGGAGGAAGGAACAGGGCCTGGGAGGAAAT  
 CTTGGTTTGCATTAACCCTTGACCCTTTTCTCGAATGTTATCGAATGTAAGTGTGTACCTGAA  
 AATGTAATACGTGTACAGGATTGAACCTGATAACGATCAATTTCTTAATCTCGATCTCTCAT  
 TGCTTCTAGTTTAGCGATTATATACTCGTGTATTTTATTAATTAATGTATACGCGATTTATTA  
 TATTGTCAATGTGTAGATGATTGTTAGAATGATTAATAAGCGATGGTACCAAAAATTTTCA

CTTTAAGAAGTAATCGCGGGTAGGAAAAGATGTAACAAGGAAATTAATTAACGTAGGTGT  
TTTCCGATTCTGATTTTATCATTATTTATCTCGACACTAAAGTAGAAGGATATTAAAGCGCTC  
GAGTAAAAATCTTTTTCCAAGTGTGTCCCGACATTTTTTTTTTTTTTTTT

403. >MSTRG.8447.1 Gene=MSTRG.8447

AAAGTAATCGTTCGATCGATCATTCTCTCCAGTCGTTTCGGTCATTCCATGATCATTCCGTAT  
TTGTTTCTAAAAAAAAAAAAATCTTTTTCTACCCAGCCTGCGTCTCAACGGGGCACAGACG  
ATCCGCTGGAAGAACGATGGATGCTCGAACGATCTTTCGATTCTTTTCGCGAATGCGCGAT  
ATATTTCTCGCATGCCCCGATTCTCATCGGAGAAGGATGAACGAAACAACGCGTGAAAAAA  
CGTGGTCGATGCCGTGCGCGCCATTCTTTTTTTTTTTCTCGAAAATCTCGATAACTTTCCCTT  
ATTTTCTCTTTCGTTGGACCGATAATGTAATTAGCGTTAGTGTTTACCATCGGCAAACAGGG  
CATTCACATCGTATATCGAATCGAGAAGTTGAACACGAGTGACGAGGAGTTTAAACGAGTGA  
GTCGCGTCTAGAGGCGAAGATTAAACACATTCCGCGGAAGATCTTCGTTCCGCAGCTCTTCT  
CTTTTATATTATAACAATAATAATAATAATAATAATAATAATTATAATTATAATAA  
TATGTCCGATATGCGGACGTTGCGCGCTCTCTTCGCGCTGCTTTGCCACGTCGAAGGCGCGA  
GACCATCGTTTAAATAACTTGTATAATCTAATTTGGGCATAAAATGGCGCGAACACCGGCA  
CGCGGTGTTTGCCCGTGCGTCGAATAGAGATCAACCTTGTACATATAGACCGCGACATATA  
GACATTATGCATCACTTTCTGTAAAACTGACACGTATACACGTACACATCAAATCACCACA  
CAAATGCTGCGATTACGACACGATTACTAACCTTACCGGTACAACACTGTTTTTTTCTTCA  
TCGAGTTTTCAACGATTACGGTGATATTTTCTTTAGGGAAAAAAAAAAAAAAAAAATTCATC  
GAATCGCGAAACAAGATCTTTTCAGCCATATTCTTTTTCGTCGAAAAGTTTGCTCGATACTC  
GTTTCGATGCGATAGATCGAACGAATGTCGAATAACGTTTGACGAGAACGCCCTCTTCTTCT  
TTTAGATAGAACTCGGGCAAAGAAAGATCGAAGAAGAAGAAAAAAAAAAAAAAAAAGATAA  
ATATAATTGCAACGGTCCCCTGGTCCCTAAGCACTCGTTGAACACTCGTCTAATCGCAACA  
GAGCCAGTCTTAAATGTCTTATTAAAGCGGCGCGCAGAGGTCACGCGCGCGTTTACGCGGC  
GTGTATATGCGCCGTTAATTAATCTCGTTGACGATTATTAATAATCGCGAGTCCGCTAGGAG  
CAATCGAGCAAACGGCGTCGCGTTCGATCGTAACTCTGGGGAGGGAGGAGGGCCCTTTGA  
GTTTCGTCCACGGTAACCCTACGTCCACGTGCGAGCGAAACCACCGGCCCTTCATTTCGTAT  
ACTAGGCAGCCATTCTCTATTTCACTTTTAAAGGTCGATCGCTCGCGCGATTTTTCTTTTCGTT  
TCGAACACTTTTCTTTTACCCGTTTCGCGATGCAGGAGAGCTCGTTGGAGGAATGTAAGC  
GGGATCGATTCAATCAGACGATACACACAACATAACCTGTATCTTTCACGATACACACGAT  
ACACGTATACATAAACGAATACATACATGCTCGCGACAAATACACACGGTACACGGTT  
TATTATTTGTAAAAGATTCGCGAAACAATACGTATATATTTACGAAACACATACTTGTACCA  
CAATTGTAATACATCGATAGACCAATCTTTCGAGAAGTAAGACGCAGTTACGAATGCGCTT  
GACCAATGTATCGCGTGCGAGATATATCGATATGCTTCGATCGAACGATGAGAACAGTCGA  
ACGCGAATTGTATAGAAAGTTGACGTACGTAATCGTGGCGCGATTAGGATCGTCGTCGGGA  
GAGATTAAAGTCGTGTTTTCTTCTTTTTTTTTTTTTCTTTTTTAAATTGAATTTCAAATCGTAT  
AATTTTTTTTTTTTTTTTATTGATCGATCGATTACCGGTATTATGTATACGGGAAGAGAGGA  
TATTCTGAAGTCGATGGTCCGCGATCGTCGATTCGTTTCGAGGTATAAAAAAAAAAAAAAAAAA  
AAAAAAAAAAAAACGATCGTATTCACCAGCGATGACTGCGTGCACCAATCGTCGGCAAATT  
TATTCGATAATTGTTAAATTATAATCCGTGGATCCGTCAGCCAATTGAAATTTATCGGCGAT  
CGCTCGCCATATTTTCGATTTTTTATTAAACCGATAACAAAGAACCAACCGTCTGCCGCGAGT  
GATCGCCGATAAAGAGAATTTTACGGTATTCCGGGGAGGCAAACATTGATGCATGAGTCCT

CGATGGTCTAACGGAAGCGGCTGTAAATGCGGTTTGAACGGTTGAGATCGAAGCTTGATCG  
AGAGAGAGAGAGAGAGAAAAAAGACATACTTTGGGCATTCTTTTGAATCGCGTTCGAA  
TGCGAATTGCGAATGAATGAGAGTGGCGAGTGACGAACAGATCGCAAGTACGTGGTTCGC  
AACTTTGAAACATGTGATACGTCAGTCGGCAGAATTGACTTCCGGTTATCGGGAACGATCG  
GGAGAAGGGAGAAGGGATGATTGCGAATGGAAAAAGAGGAAACGTAAGCAGGAAACGG  
AACAAACGTAAGCATACTACTGGCAGTGGATTGCTGGCTGACGCATTTTTTAAAGATTCTT  
TGAAGTAGGAACGCTCTTTTGTGAAAGGTTGATTGTTATCAAAATGGTTGTGAGGTTATAA  
TGTTTGAATGTGTTAATGATGCGACGCGAAAGTTCGATCGACCGATCGACACGACTTCCG  
GAAACGAAATCGATTTGTTGATTAATCGATTATCGATCGAAAGAAATTTTTTTCTTTTTT  
CCCCCTCCACGTTTCGAGAAGCCGTGTCGATCGTCTCGCCGAATAGCAGACGAGGAGACG  
AGTAAGGAAAACGTGCGTTCGCGTTCCAAATTTTTTTTTTCTTCTTTTTTCATTGATTTTCG  
GAACATTTCTTTTAATCGAAGTTACATTTTTTTCAACATTACGTATTATATATTTGCTATTTAT  
GAACAGAATATACGAATATACGGTCGATCGGCCGTAGCATTTATTTCTCTTACGTTTAAAT  
TGAATTCGATTGGCGGGAGCGCACGTGTTCCCCAATATTGTGAAATTCGTCTCCGAGGAA  
GCGTGCAACTGGCATTACCCCGCATAAAGTCTGGTTCGAATTGTGTGTTCAATTTACGACAA  
ATCGATGATGTTTTCCCGCGCTGTTTTCCCTTTCGATTGCAATAGGTTTAAAGTAAAAAAA  
GTGGAAGATCTCGTGCATTAAGAGGGAGTTAAGTAACGACAGGTAAGACATCCTCGAATT  
GTTGTACGGAAGATGATCAACCAGGCCGATGTTGAAAAATGTGCGACTGATATAAACCAGT  
ATTCGTGCGAGAAATAATAAATTGTAAAATAAAATTCGCGTAACCTAGCCTTAATGAGAAA  
GATTAAAAATTAGGTGTAATAGAGGCGGTGCCGCGAATAATGGCGGCCTCGCGTCGAAATT  
ATCTCGATTGGCTGTAAAATATTATCGTGGGAGATGGGAGCGACGGATTGACGTTTGGAG  
ACAAACGAAATTTCTCGAATTTTCTCTTCGAGAAGAAAAGATAAATCGATAACCGAAAGA  
AAGAAACGAAAACGTGCTCGAACGTGTTCCCTTCGCACGGTGATGTATCTAGTGAGAG  
TAATGTTACTAGGTAACCTTAAGCGTATTTTAAAAAAGAAAAAAAAGAAAAAAGAGAAAA  
AAGTATAACGAAATGCCAGTTGTAGTAAAAAAGTTTTTCTTTTCGAGAAAAGGAAAGAG  
AAAAAAGAGAAAAAAAAGACACAAAAAAAAGAAAGAAAGAAAGAAAGAAAAA  
AAAAAGAAACACACGCCGAAAAAAAGTACGTGGGAAGGCATGTTTCGATAAAAGGGAGA  
ACATGTCTCGAGCGACGCGTCCATTTCATTGCCGGGAAACGAAACTGTGCAACGAATTGGCA  
ACACGAGTAGTAGAAGAAATAGAAAATTGATGGAACAGAAAGATATGAAATTTTCGTTTA  
TTCGGTACGTTTCGGCGAAAGGAAAGTTTCCCGCAAAACGGCAAAGAGATCGTATTTGGTCG  
CGCGATGTCGTGGTACGATCGGTTTTTCGTTTTTCTTCTTTTTGATTATTTTCGGACCGCCGA  
AGGGAACGATCACAAGGGATGTTCCGCGAAACATGAAAATAGAGTGAAGTGAAGGTGA  
TAGAAGGGTAATAAAGGGTGTATACAATATAATAAACGGAAGCGAAAGAAAGAAAGGAT  
AATGGCAGAGAAAAAAAAGATGTTAATAAATATACATATATGTATGTATGGGCAACGGAA  
CATTTGTCACATGTGTATACGCGAATTTACAAATTTTTTCAAGAAACGACAGCTTTACCGATA  
GATTAAACAATAGATTTTTTCGCAACTTGGGCACACGTAAAGAAAACAAACACCTCAAACA  
ACATGACACACGATTAACACATTACATACAATACGCATTACATGTAAAGCGATCCATGCGA  
AACAAAAA

404. >MSTRG.8488.2 Gene=MSTRG.8488

CTATTATGTTAGTGAGAATGCAGCTTAACATAATTTGTTTAATTATCAATAAAATTATTTTAA  
AAGAATTTTGAATAAACAATTTCTATCTTATTCTAACAATATGGATGAAGAAATGCGTACTC  
TTTGGTGTGGAAATTTAAGTGAAAAAGTGACAGAAGAAATTCTATATGAATTATTTTACAG

AAATTTGAGAGTTATTCAAGACACAACATATATACACCATATTTTGGGAGATTATCATCCA  
AGATATATTGTAATTGTACAGTTGAAAAATAAGTATAAGGAAAAACAATAATGGAAAAAG  
GACAAAGATAAAATAAAAATAGTAGAATTAATATTATTTCTAGAATGTTGTAAATGTATAA  
TGGTATAAACATACAAATAAAAATAGACAAAGATGACAGG

405. >MSTRG.8504.1 Gene=MSTRG.8504

GTTTTTTAAAATATCCAAGATAATTTGACGGTGACAAAAATTTGGCAGGAGTCGTTGTTCCA  
CTTTCCTCGTCGCATCTTTCATCCCCGAGACGAGGATCGCGTTGCGAAAAATAATGGAGAG  
TCGCGAAAATTCTACTTTCATCGTGTACGATCGGGCAAAAAGAGGGCGCGTACGCGCGCGC  
GCGAGAGTTTCACCCGTTTTACCTCGCTCTCTCTTTCCTGTTCCCCCTGTACTTGTGCTAATCC  
TCGTCTTCGTCTTATTGTTTTTCAGCCGGTTTGCCGACGCAGCGAAACGATTCCGCAAAGGT  
AGCCCTCCGCGCCTCCGGTTCGTCTACCTCTCGCGTTTCCACGTATCCAGCCACGCGTTTG  
CCTGTGTGCGCGGTGCCTGCCACTCACACAACGGGGCGCCGCGCCCGTACGTGTAACGTGCGT  
ACGTGCGCTTATAAGTAGATACGTGTGGGACGAACGGGGCCCCAGTTAGCATAACCTGATCT  
CGAAGGCCTCTCTCGGGTATCCTCCCTTCACTCTCTTTGCCTTTTCTTTTTCTTCCCTTTTCT  
CTCTCTCCTTTTCTGTCATCGATCCTGCAGCACCTCTTCCACCTTCTCTTTTCGTTTTCTTCTC  
TTTCTTTCTTCCCGTTTTATCCGTATATAACGCGCATGCGCGGTTGTGTGTGTATATATATATT  
TCTCCAAGGGAGAGATACGGGGACGAGCAAAAAAACGAATGGACAATAATGGTATAAAC  
GTTTACGACGTAGGAGAGGACGTTTACAGAGGACGCCACGGATGCGTAATTTGCGGACCTCGT  
GCGGGAGAAAGGAAAACTAAGATCCGTATTCTAATTAAGGTTAAGGATAATCTTCGCGTC  
GTAAGATCCAACCTGGTTCCACATCTCTTCTAGCGGAGTGTTGAGTTAAGATAGTAATTC  
TAACATGATACAAATGATTGGAGGAAACAGTGTGATCGTGACGAATAACGATGGGACTAA  
GATCGTCCAATCCGGTCGCACTTCCGACGGAAAACCTTATATCCGTGAAAGCACGGACAAA  
ATTATAGGCGACACTCTCCGACATATTGAAAGAATTTACGATCCCATTACTAATACTTCAAA  
GATGCACGGGTATACGTTGAATTTAAAGGATCCCTCGGCCAAACCTGTTCCGTTAAACGAT  
ACTGTGTAAACGATGCCAAGGAAAAATGATGCTTAATCCTTATATTTAACAATAATCATTTA  
TCTATCTATAATATTATATTTCCATGTATATGTAAAGGACGTAATAAATGAGTGAATAATCA  
A

406. >MSTRG.8539.2 Gene=MSTRG.8539

ATTTATTCACTTACCTTATATTACTAATCTTGTTATATTTTGAAATATTTTTTATAACAATTC  
TTATAATTATAAAAACGTAATTAACCATAGGGTATATAAATTATAATGAAGGTATATGA  
ATCTTTTACTTAAATAGATTAGAAGAAAGATGAAACCAAACGCAAAATTGCTTCGTTTCGCT  
CATACAAGAAATTGACGAACGTCATCAGAACAAAAAGCAAAAAATAATATTATGATACA  
GTATGTTTTGGAACAAGCAAAATCTCATCGAGAACTTCTGAAGTCTTGTGCAAAGCACGA

407. >MSTRG.8595.1 Gene=MSTRG.8595

ATACCTTTGTTTATGGGGACGACGTCCGGATTTCTGTCGTCCGTATCGTACAAATCCTCGGA  
ACTAGGAACGGCACTCTTCTTTAACGGTAGATCGCTCGGCCTCTGAGCCCTCCTCTCGTTTC  
TTATCTTCATAGCTACCAGAGTAGCTATGGTAACGAAAAGTAACGCGGTCACTACACCGAT  
CAGCCCTCCTAATAACGGAGTGATCTCAAACGGTACCGGTATACGTTTCGTCTCGGGATTGC  
CAGCCAGACTCATCAGTAGGGCTACGACTGACAACCCCTGCCCTAGACGTTGACGGAAAA  
TTGTGCAAATTCGTTAAAGAAATTTGTCGTAAATTCGCATTCGTTGGCAGAAGAGAGACGA

CGAGGAAGGAGAGAGAATTTCTCTCGACGTCTCGTTGTCATCAATTCGTCGCGTCACGTCC  
GGATCCCGGGGAACACGGGTTCTCTCAGAACGCTAGGTTTCTCTTGCTCTTAATCGCTAACC  
GTTCACTCGAGATACGATGGTGCACGAAAAACAGTTTCGTCTCGGGATTGTCAGCCAGAC  
TCATCAGTAGGGCTACGACTGACAAACCCTGCCCTAGACGTTG

408. >MSTRG.8616.1 Gene=MSTRG.8616

TGTGGCTAAGTCGGAACGCTGCTTCTTCCGCACGCGGAAAGACTCGGTTCGAGACTCGCTT  
CTCGACTCGAGTTTTTTTCGCGAGCGACGGACAACCTTCTCAACTTGTCACGAGGGAATGACC  
CTCGGTGTCTTTCTCCCGCTACGGACTTGGGAAGTCACTCTCCGGTCTAGGGGGTTTTTCACC  
CAGGAGACCACTCTCTCCGGTCCGGGGGGTGTCCGGATCGGGGAGGATAAACTAAAAGG  
ATAATATATTTGAAAAAATTAAAGAAAGAAATGAATTTAATCATTATCATCAGATGGATT  
ACTTTAAGTGGAGA

409. >MSTRG.8617.1 Gene=MSTRG.8617

GATGCAGTGAAAAATATTGTTTATTAGTGAATTCACATCCGTGGAATAATTAAGTCA  
AATTCAATATGCATTTGATCGCATTAAATGGAATGCAAAAGATAATATAAAATTCGATGCAA  
TATAGTAAATAGATTGCAAAATTGCCTCGACGACAATGATAATCACATAGAATAAATATTT  
TTACTAAAAATGATTGCAAAATGGATCAATTCTTTGAGTTCGTATAAAAAATAGAAATTCA  
TTAAATGAAAGGAAAAAATTCAACATTATCATATGTGGAGAACGAAGAGGCCATATGTGA  
AAAAATATGCATTTTTTTGTGACCGATGATGTGGAGCATATATAAAATGTAA

410. >MSTRG.8618.4 Gene=MSTRG.8618

ATTGGATCACAAATGAGGTTTATGTATAGATAAAATATTAAGAGAGGTGAAATAGAAAAT  
ATATAAATTAAGTGATCAATATTCTTTGTGCTCTTATATATTTTTTAACAATTTTTTTGATTGT  
ACTTACTAATAATTTAATTATCAATCTTGTGATTATATAAACAGTTATAATTTTTATTACAGTT  
GTACATTTTATTAATAAAATTCAAGTGAACATATAATACAGTTATAATTGGATAGTAACA  
AGAACATTTTCATATTATAAAACAACTTATTAACACTTCATTGTAGTGTTTATTAAGTGG  
GTTCAAAAATCTCTATTGCTTAAATCTGTATATATTATTATTAAGTACAGGTACAAAAT  
TACGGAGCAGAAGTAAAAAATGGATTATTCTAACGGAAATGAATTTGAAATATCTTATTTT  
AGAACGATATGGAGTGCTATTGCATCTATTGGGTGGTATTTAATTGCAATTGGAATCTCATT  
TTGGCTTGCATCTCCTTATATTGAGAGAAATATTTAAATTGGAACTAAGAAGGGACGAA  
TTGGAATATGCAGCAAAATATCGTAAAAATCCAGATCTGTTGCAAGCAAGATTATTAGGTT  
TGGAAGCTTCAAGACAAAGGATGCAAGAGGAATATTATCAGAAATGTGCCATGTTAACAG  
AAGAAAAAGGAAAAGAACAGAAAGAAAAGATAAAAGAAACATCAAAATTGACTTTGGA  
CAGCAATGTCTTAGACTTTAGACTAGGAAAGAAAAATAATGATTTACAGAAAAAGAAACA  
TAAGTCATTAAGAGAAGAATATAATCCATTAATGGGTGATGGTTCTAGAGGATATCGACCA  
CCTAAACGTACTTGTGTGGAAAGGGAGGTTGCGGGT

411. >MSTRG.8676.1 Gene=MSTRG.8676

AGCTGAACGTTTCATAGCTCCACCATTCCTTATTGTTAGAACAACGTCAAACGGAATATTC  
GTTTCGTGAATCTGTTTCCTATATATATTGATAAACACGATAAAAAAGCCAAAATTGGGTGAT  
CTATTAACGTAAAAGCGTTTCGGACGCATCCGGGTAAAGTTTTTTTTTAAATTTTATTATAA  
TTCAGAAAGTATTTACAAAATACATTCAAATGTCTAACTAAAACAAAATGGCGAAATAAC

GGGAATAGTACAATTAAC TACAATTACAATGACTTTTAATTATCAATTAATTTTTCATAACC  
TAATTATATTTTTTAAATAACAATTTTTTTATGGTAATTTCTTTTTTATTATTAACAATTA  
AAACAAAC

412. >MSTRG.8724.3 Gene=MSTRG.8724

CGATCAGTAGTCCTAATGTTGGACTGGCGAAATCGACGAAAACAATAATTTTGTAGACGAGT  
AATTACTAAATTTAGAAATCAGTACCGCACGAAGCAGGACAAAAAGCGTTGTTCTGCGTTC  
GTTGTCGGATTTTATAGTGATATCTACGTTTCTTGAATCAGTAATAATTCAAGCTTTATGGTC  
CAGATCATGCAAAATAGAAACGAGCGCCCATCGCCAATTGTGTGCATTGCGTATCATCAAT  
TAAGTATAATGACTGGTATTAAAGATCCAATAACAACCCGATTTAGAGAAAATAAAAC  
AAGAGAATGAACAAATGAATGTTATTGTTAAAAGAAGTTTATGGATATAAAAAATATGTA  
TATGCAACATTTTTTTAAATTTTCTAAAGATATGGCAGAATCTTTCAGGTCAATATTAGATG  
ACATAAAAGTTCGTATTGAAGAATTTTCATGAACAGAATCAATCTATATTTGATCTATTTTCA  
CTTTCACAACTACAAAAGTGGTCTCAATCCCAACGTGAACAATAATTTGAAGTATGAAAAT  
ATTGATGTTTTTTGATAGATATGTTTTTAAAATTTATAATTATAAAATAAATAACTTGACCAA  
AATATATATTTACGTTTCGCACATTCTTGATGAAATAAAATCATTATGTATATTTAAAATCGT  
AAAATTAATAAAAAAAATATTATGAAAAAATTATTTATATTTAGAATATCTTAATTAATAA  
ACAGTAGAAAATAATTATATAATATTTAATTATGTCATTAATTATATATTTTATACTTGAAAT  
TTAAAATGTTGCAGTTGAATGTATATTATTTAAATGCTGATAATATGACGACGACGCATCTA  
CATCGTACGCCATCTTAATTCGAGTATGGTTGCCGCCAATGTACTACGTTTCTCTAAATTTTA  
TTACTTTGTGAATTCTTAAAAATTAATATTTTTTTTTTGGAAATTAATGATTACGTATTTATTTTT  
ACATAATCCATTTTTGTTCATTTATTTCTATATATTAATATGTCACAACAATACTGTTTTCTTT  
GTGCAAGTGATGGTGGTGTTCCTTGATATTACGGAGGATAATAAACAAGTATATTATGAT  
CAATTTGAGATCTGCTCACTTGTTAAGGTAGTTTTACATAAAAAAATGCGTGCTTAAAATCA  
CTAATTTGCTAGTGAATATTCAAATCTGATTAAATTTTCTGGAGCAAATCTGAACGTGCG

413. >MSTRG.8750.1 Gene=MSTRG.8750

AGAATTGGTGTGGGTTGAATAACTATTGATAATCATGAAGAATTTTGCCTTAGCAATTCTTG  
TTGTTACCTTTGTAGTCGCGGTATTTGGGAATACCAACCTAGATCCGCCTACTCGACCTACG  
CGCCTTCGCCGTGAAGCTAAACCGGAAGCTGAACCCGGAATAATCGGCCAGTATATATTC  
CACAACCAAGACCACCTCATCCGCGTCTTCGCCGTGAAGCTGAACCGGAAGCTGAACCCG  
GCAATAATCGACCAGTATATATTCACAACCAAGACCACCTCATCCGCGAATCTAATTTAT  
GAAGAATATGAAGCACGTGAAATATCAAATATTTAATAAAATATTTTTATTTCGATTCATTAT  
AAAATATTGTATGTAATGCTA

414. >MSTRG.8753.1 Gene=MSTRG.8753

TGCTGTGTTCTCGTTCGGATCTCGGTGTTCCGTATATTTTCGATGACTGACTGAATCCGCAGTC  
GATAGTAGCGATAGTTAGCTATCGATTGTCGAGCGTGATCCTCGTCGTCGACATCGACCCGT  
ATCGAAATTGAAAGAACGATGCAAAAGTGAATGCGAGAAAAAGGTAACAGAATCAATGA  
CAAGTCGTGGCAAAGTGAACAACACTTTTTGCGAACATAATATCGACGTATAGTATAGAGT  
AAGACGAAATTGGATGGGATAAACGGCGACAAGAGGGAACAATTACGATCTATCGAGAA  
GAAAATCAGAACGTAGAGAGAAGAGGAGAGAACAATCGAATGGAACAGTCGGTTCGCGC  
GCCAGCACCAAGAACGCAGTGACCGTCGTACCTGTCCGTGGTGGCCGAAGACTTGTCCGA  
TCGAGACTCGGGAGTGATGTGGCAACGTTGCTGGTGGCTCGCGAGTGAGAGAGTCAGTCGT



TGCTCGGCTGTTCTATCGTAGTCTGTGTCTGACAGTGCAGTGTGCTGCCAATAGAACCGCG  
AGGGCCCGTCAGGGCCACGAACAACGCGAACACGAGCACCGCGATAAACACCGCGGTC  
AAAATGACATATTTAAGAAAAATAAGAACGAATTACATCACGAGTATCGAAGGGACAATC  
GTACAAACACGTCGTTTATTGCTACGATAGCGCATGTTACGTTGTTTATTACCATCGTAAA  
ATAGCTCAAGAGAAGAGAGAGTTCATGACTTGCGAGAGAGTAACAGTGTTCGAAGCGT  
ACAATCGCTGTGTGACGCGCGTATTTCGTTGTATATACACATCCGTTTCGAGTCGCTACAAGC  
GGGTTTTCTTCGAACCTTTGTAGAAGTTCCTAAAGTGCCTGCGTACGGTTACATACGCGGCT  
GCTACTCGAATGTCGAGAAACGAATGAGTGCCTGAATCGTGACAACATCGTGTGCAAGTGT  
ACAGAGAGTACTCAGAGAGAGAGTGAGAGAGAATCCGTCCTCTCTTTCTCTCGCATCCCGTA  
GAGGCCGTGGTCGGACTTTACGCCGTCGTACGCGCTTCTCCCCTCCCCCTTAATAGACTGCT  
TCTTTCTCCCTCTCTCTCGCTGAAGGCCAATTTATCTATCCCGTCGGCCGTACGTCTGTCTTA  
GTCTATAACCATTCCTGTCTGTGCGCTGGCAGAGTTTTCACTGGCGCGACACGGCACGGCACG  
CGCGCACGGTACGACACGTAAACGAAACCGGCTGTCCAGGCGAATCGGGAGTGTCAAAGA  
TCCGAAAAATCACGGGCATGGGAACAGTGTGTGCCATGGACTGAAAAATAGTGCGGGACC  
CGTTGTCTCGTGCTTACCGCCGTCCAAAGAAGATCTTGCAATTCATCCGGTGCGTGCTTGTGT  
GTTCCTTTACACCAAAGGAGGAAGAGAGGTTAGGTTAGGCTAGGACTCGCGTCACCCCTGG  
CCACAGTCCGTCTTGTCTCTTACACTTGGTTCCCCTACCTCTCTTTCTCTGGCATAACAAC  
GAAGAGGAACGCAGACACAAGAGTCCAGACCGATTACATACACACGTACGCGCGCATAAC  
ACGCACACATACATACGCAGGACAATTGGGGAAAGAGGAGGAAAACACAAATGCCGATC  
GCCCCGTGGAATTTCTGGTCGCTGGAAGTGCCTGCTATTGCTGGTCTTCCGCCGCTGGCATGCT  
TCGATTCTCGCTAGACTTTTACAGATGCGCCAACGGTTATATCGGGCAGAGATGCGAGTTTA  
AGGATTTAGATGGTTCCTATTTACCATCCCGGCAACGTGTAATGTTGGAGACGGCAAGCAT  
CGCCGGCGGTGCCACGATAGCAGTATTCCTGGTCGTTATCATTTGCATAGCGGCTTACATCC  
ACTGTAAGCGAAAGCAAAAGGAATTGCGGTGAGTAACTGCGTCGACACGGTGGATGGTC  
CTGGCCGAGATCCGGAGTTGAGGCCGTTTAGCAACCGTAGCCGCTCCCTCATGATCTTCATG  
ACCAAGAATCCCAACAGCTCGGCGGCTATAGAGCAAACGAGAATGCCCGGATGGAAGTGC  
CCTGAAGCGGAGTCAATGAGAATGGCGTCGATCAGCGAAGGGAAGCGTTCCAATCAATGA  
TAAAAAAGGATGATCCCGGTAGGTGTGTGCTGATAATTCCACGACACGGGCCCCGTACGA  
GGCGTCCACCTCGCGTGTGGAAGCGTTGTGGAGCATCAGCGAAACCGACGGAAGGGAAAAA  
GAAATCAGCTTTTCTTACCTTCAAACCTCTGCTATCTGTCTCCGTCCATGGACCAATTCTCG  
CGATTAGGCGAGCGTTAGAGAGGAAATGCAGGCAGAGAAAGAAAAGGAGGGGAAAGAA  
TTTTTCTCTTTCTTATTTACACGAGCCTTTGTACGTGACGTTTCATTTTCCCCGCATGAATT  
TATCCGTTTCTGCCGAGAGAAGGAAAAGAAGGAGGAAAGGGGAGGAAAAGGAGAGAGA  
AAGAGAGAAGAAGAAGAAGAGAAAGAAAAGGAGGAGGAGGAGGAGGAGGACCTCTTCT  
CCTCTCCTCCTCCTCCTCCACGTGTTTCGTTTACAATCGGACAAGATATATTAAGCAAA  
AAAACAAAAAAGAAAGATCTCGTCGTAATCGATACGTGGATCGG  
GATCCTCGGGATCGATGATCAGGGGCAAGATAGATCTAGAAGAGATCGTTAGGATTAATC  
GAGAAAAAGAAGTAACGTAGCTGGTAACCTTTAAATAGCTGGACCTGAACAGCTGGAAGAA  
CAAAGGACAAGAAAGTAGAAAAAGAGGAAGCTTAAAAATAAAGCCTTCTAACTACTGA  
ATAGGTGACTCTCTTAATAGAAAGGGGAAAAAAGGAAGAGGTGTGAAGAGGGAGAGAC  
AGAGAGAGAGTAAAGAAACATTTAGCGAGAACTAGAGTAGTAAGAAGGAGAAGAGGTAT  
AAAGTAATTTGTTCTATCGGAGTTACGAGATATATATATAATAGTTTAGAACAGACAATA  
ATAACCGGAGAATAATTACGTAACGTTATGTATTAGCATCGGTTTAAGATAATAACGTATTC

[illegible]

TTATCCGTGCGTATCTCGACGAAGAAGATTTCCTTTTCGATTTGTTCTTTAATTTAGGAGTCATA  
TTTTCTTTTCCTTTCTCTCTTTTATAGAGATTTCGCCTTTATCAAGATCAACAGAGACAAATATC  
CCCGTGCAATTCAATCCCGCGCGAAAAAAATGTAATAATAATTCGAGAGAATGAAATTC  
GAGTAATTGCTTTTGAACGATTGAGTTAACTGTTCTCTTTAATCAATTGCGATTTTCGTTTCG  
TCGCGCATCGAGACGACAACACGAGCTATTACTCGAACTGCCACCAATTGGCCGATTGAA  
GGAGGGCAAATGGGAGGGAATCTTCTTAAAATGGTTACGTGATCGTCGAGGAAGGAAATA  
GGTTCATAGGTAGATTACGAGTGTCTCAGCTTCTAGAACTTGAAAAAATTAATCACTCC  
GTCACGTCCGAGTGATTGCTCCGCGACACCGATCGTCTTCGTATTATTGAATTTCTTTTAATT  
TAAATGCAACCGATCGATCGAGGGTTTTTTTTTTTTTTTTTTTGGATTTTTTGGATTTTTTTCTC  
AATTTTCGATCTTGTCAATAGAGATTAAAAAATGAAGACGAGGGAAAGAAAAAGAAAA  
AGAAAAAAGAAAAAGAAAGGAATCGGTTCGCGTTCGAGAGCGATGACTCGGGCCTG  
GTTACTTTATTAGCGACCGTTTAAGCGTAGACAGTGGTGGCATTTTAGTACATCAGACAGCG  
CCGTGGCCGTGTATCGCGAAGATCGAGACGAAGAGTGGGGGAAAAGGGTGGG

415. >MSTRG.8753.2 Gene=MSTRG.8753

TTAATCTGTGAAATCTTTCCTTTCTTCAATCTCGGCCGTGATTCGGTTAATTAATTCCGTTC  
AAGGGCGAATCATCATCAGTTCACGGAGGAATACCGTTCGATCAAATCGACCATGCGCCA  
ACGGTTATATCGGGCAGAGATGCGAGTTTAAGGATTTAGATGGTTCCTATTTACGTAAGTAT  
CCAATTCTTCATTCTCTCATTGTATTCCCGCACGCTCGTCGTCCGTATCGTCTTATTCCATTCT  
AGAAGCCTCGTTTCTATATAGCGTGTATAGGCGGTGTCTATACACCCATTAAATGTCGAGTG  
TGTATAACGCGCTCGGTTACAATGTGAATTCGAAACGAACCTTCTCCTGTCTCTCTTTCTCTT  
TCTCTCTTTCTTTCTTTCTTTCTCTCTTTCTTCCCCCTCCTTTCTTCCTTTTAACGTCCATTTTC  
TTGAAACGCGTTCGCGGAGCGGAGCGGTAAGCATAAGCGAAGGGGCAACGAGGTTGCTGCT  
TGTGTGGTTAAGAAAGTGACAATAAGTTTTTCTTTTTTTCGTTACAGCATCCCGGCAACGTGT  
AATGTTGGAGACGGCAAGCATCGCCGGCGGTGCCACGATAGCAGTATTCCTGGTCGTTATC  
ATTTGCATAGCGGCTTACATCCACTGTAAGCGAAAGCAAAAGGAATTGCGGTTCGAGTAAC  
GCGTCGACACGGTGGATGGTCCTGGCCGAGATCCGGAGTTGAGGCCGTTTAGCAACCGTAG  
CCGCTCCCTCATGATCTTCATGACCAAGAATCCCAACAGCTCGGCGGCTATAGAGCAAACG  
AGAATGCCCGGATGGAATGCCCTGAAGCGGAGTCAATGAGAATGGCGTCGATCAGCGAA  
GGGAAGCGTTCCAATCAATGATAAAAAAGGATGATCCCGGTAGGTGTGTGCCTGATAATTC  
CACGACACGGGCCCCGTACGAGGCGTCCACCTCGCGTGTGGAAGCGTTGTGGAGCATCAGC  
GAAACCGACGGAAGGGAAAAGAAATCAGCTTTTCTTCACCTTCAAACCTCTGCTATCTGTC  
TCCGTCCATGGACCAATTCTCGCGATTAGGCGAGCGTTAGAGAGGAAATGCAGGCAGAGA  
AAGAAAAGGAGGGGAAAGAATTTTTCTCTTTCTTATTTACACGAGCCTTTGTCACGTTCGACG  
TTTCATTTTCCCCGCATGAATTTATCCGTTTCTGCCGAGAGAAGGAAAAGAAGGAGGAAAG  
GGGAGGAAAAGGAGAGAGAAAAGAGAGAAGAAGAAGAAGAGAAAAGGAGGAGGA  
GGAGGAGGAGGACCTCTTCTCCTCCTCCTCCTCCTCCTCCACGTGTTTCGTTACAAATCGGAC  
AAGATATATTA AAAAGCAAAAAACAAAAAAGAAAGATCTCGTCGTA CTGCTGTA  
TAAATCGATACGTGGATCGGGATCCTCGGGATCGATGATCAGGGGCAAGATAGATCTAGA  
AGAGATCGTTAGGATTAATCGAGAAAAAGAAGTAACGTAGCTGGTAACCTTTAAATAGCTG  
GACCTGAACAGCTGGAAGAACAAGGACAAGAAAGTAGAAAAGAAGGGAAGCTTAAAA  
ATAAAGCCTTCTAACTACTGAATAGGTGACTCTCTTAATAGAAAGGGGAAAAAAGGAAG  
AGGTGTGAAGAGGGAGAGACAGAGAGAGAGTAAAGAAACATTTAGCGAGAACTAGAGTA

GTAAGAAGGAGAAGAGGTATAAAGTAATTTGTTTCCTATCGGAGTTACGAGATATATATATA  
ATAGTTTAGAACAGACAATAATAACCGGAGAATAATTACGTAACGTTATGTATTAGCATCG  
GTTTAAGATAATAACGTATTCAGTTAAGTTTTTCGAACGAGATAATCCATTTTGCTAAGTAG  
AAACAGTTGCCACTTTGTTTCGTAGAAACATTCTTCTTTTTTCTTTTTCTTTCTTTTCTTTCT  
CGACCGAGGAGGAAACGCGCGGAAATAAGCTTTCCTCCTTGGCACTGGGGGGAGGGGAGG  
AGAGAGGGAAGGGAGTTAGTTTTCACTTTTGCTTCTTACCTTTTTTTTTTCCCTTTCATTTTCTT  
CTTTTTTCCCCTCCCACGCCCTGTTTTCTGTTTCGTCCGATTTCGTTCTGTTTCTTTTTTCACATGG  
TAACTCCTCGTGTTTCGTTACCGACCGACGCCGAGATCGATCCGAGTTCCAAATTCAACGCA  
TACACACACACACACACACAAGTCAAATCTCTTCCATCGAGACATGGAAAATAGAACG  
AGAATCATTTATATCGTATATCGATTAAACATAATGCAAATTACGTTGAGCGTATAATTCTT  
CCTTCGTCCAAGACGAGAAGAAATTAATAATCTTTGTATCGTTCTGTTTTCTGTTTCGATGAAA  
CGATATATGTGTGTATATATATATATGGACAATTGATCCGCGTGATCAAGACGAGAAAAAAA  
CTAAACTTGAAAATGTTCTTCTCATTGTAAAATGTTTCGTTTAAATGTACGTACGTAATTATTT  
ATTTGAAAATCTAATTTAAGTATATATATATATATATATATATATATATATATATATATATAT  
ACATGTATTATTTTCGTCCGCACAACGTGTAACTTAATTTAAATTGGCGTGTGAAAAAGAG  
ATGGAAGGGACTCGTGAGTGGTGTCTCTGCGCGGTGGCGTGTTTCAGACCTAAGCGAGAA  
AGGAGCTAAGCCTCGGTATAGCGTTTCGATTAGAAAGAAAGGTCGATCGAATCCTAATAATT  
GCACGAGATGGCGTGGATGGTATGGTGGATCTTTGTCGAGAGCCACGTCGATGCGTATCCC  
TGTTTCTTGCCTCTCCTCTTGTAATAGTAAATTATCCTGAATAATATATATATATATATATAT  
TGTATATACATACATGTATATATATACGTATATATGTATAAAGGCCAGCCGACTCGTCCCCC  
GTGTCAAATTTATTTAAACGCGAGCGATTGGCATCCATTGTAGCGGACAACTACAATTA  
TGACGACGCTAACCGGATTTCCAATTCCTCCTCCATCATGACCTCCATTGACGAATAAATAT  
TTCATCGGGAGACGAGTCTGACAGGATTCATCGTTGTGGCGTGTGCTCTCCTCTTCGAGAA  
GAATATTAATATTACGAACGAATAATTATTACGAAGAACTTCACCATCGAAAGATATCTC  
GAGAGGTATCGAGGAATCGAAAAATGCCATCCGTGACGCCATCTCGGGAGATTCTGGGGG  
AAGTAACTGGGATATATCGATTGGGATGGTTCGAACCTGATATTCGATTGTACATTTGTAGA  
TAATGTGCCGTGGTGGAGTGGACAAGCTTCAAACGCTTCGAAGATAACGAAAAAGGTGA  
AATCGTTTCGATGTACTTCTTCTTTTTTTTTTTTTTTTTTTTTTCCCTCTCTTCTTCTTCTCGC  
GTGTAAGAAAACGCGAGAGTAAAACGTGTGCCGCGCTAGATTCATGACCCTCCCGTTTCT  
TTCGTCTCCCGTGTTTCTCTTTTCGTATAACCTCCAAATCGAGGTTTTTCTATATCGAGGAA  
GGTAATCGAACGAACGGAGGAAACGAGAAAAGAGCTAAAACGATAGAGAGCCGTATAAT  
CGATAATTACGATATTTACGTAGAATTTAGGAAAAAATAAAAAAATAAAAAAATAAAAAA  
AGGGCAGAATCCGAGACGGGAAACGCGTGAAGCTAGGTGGCCTAAAGTGTATTTTATTTTA  
TTTTTATTATTATTATTATTATTATTATTATTATTATTATTATTATTATTATTATTATTATT  
GCCGTTTAATTCGTAATTCGTACGGTGAATTTATTATAAATAGTCCTAATTAACGTGAAGA  
AATCGTAGCGTGAAAAAAGAAAAAAGGAAAAAACTCTTAATTTAATTATCCCCCAATC  
TACTTCTCTCGTAACCTTTGTACTTGGTTCCTAATTTATTCTTACATTATTATTACTATTACCAT  
TATTATTACCACCACTACTACTACTATTACTATTATTACTGCTACTACTACTATTATTATTATT  
ATTATTATTATTCTATGTCCCCCTTAATTATTTGTACGGTTATTATTATCATTAACCTAACT  
AATTTACGATCCATTAAGTTACGATCATTTAATTATTCTCCTTTTATTATTATTATTATTATTA  
TCGTCCGATCACGGATTAATCAGTTTATTCCTTAATAATCGCTATTCGCGTTATTATTGGTT  
AACACGGTTATCTTTTAAGGATTACGCACTTATTATTATTTATAGAAAAAAGAAAAAA  
AAGAAAAAAGAAACGAACGAACGAACGAACGAACGAACGAACGAACGAACGAACGAACGAACGA

AAAGAGAGAACGATATAGTATATATAAAATAAATATATATATATATATATTATATTTAGAAA  
 AAAAAAAAAAAGAAAAAACGAAGAAAAGCACGCAATTTCCGACGCCAGTTTACCTGTG  
 AGAACGCTCGCCGTTTCTCTTATCCGTGCGTATCTCGACGAAGAAGATTCCTTTTCGATTTGTT  
 CTTTAATTTAGGAGTCATATTTTTCTTTTCTTTCTCTCTTTTATAGAGATTCGCCTTTATCAAGA  
 TCAACAGAGACAAATATCCCCGTGCAATTCAATTCCCGCGCGAAAAAAAATGTAATAATA  
 ATTCGAGAGAATGAAATTTCGAGTAATTGCTTTTGAACGATTGAGTTAACTGTTCTCTTTAA  
 TCAATTGCGATTTTCGTTTCGTTCGCGCATCGAGACGACAACACGAGCTATTACTCGAACTG  
 CCACCAATTGGCCGATTGAAGGAGGGCAAATGGGAGGGAATCTTCTTAAAATGGTTACGTG  
 ATCGTCGAGGAAGGAAATAGGTTTCATAGGTAGATTACGAGTGTCTCAGCTTCTAGAACTT  
 GAAAAAATTAATCACTCCGTCACGTCCGAGTGATTGCTCCGCGACACCGATCGTCTTCGT  
 ATTATTTTTTTTTCTTTATTATTATTATTATTATTATTAACATTATTAATATTATTTTT

416. >MSTRG.8767.1 Gene=MSTRG.8767

CACTTTATTTGCAATTCGAAATGTTCTAAACAGTTTTGGTGACTTTTATATAGTGAAATTTTA  
 ATATTGGAAATCCTGTTTAATATATTGTGCAATCAATTTGGCCATTTTCGTCAGTTGCTATCCG  
 AACAAAATGTCGGCTCATAAAACGTTTATTATCAAACGAAAACCTTGCTAAGAAATTA AAC  
 AAAACAGACCGATTCCACAATGGGTCAGAATGCGAACTGGCAATACTATTAGATATAATG  
 CTAACGCGCTCATTGGAGAAGAACCAAATTGAAACTGTGCTGGTAAATAATAATTTTTTG  
 GTGGTTTTCTTCTTCTAAACGTACAAAGTAATGAGTATGTCTATAATGTACCATTCCAATTC  
 TTGATCTAGCATGACGTCGTATTCCTTTTATTACTTCACCTTTTGTGCGAAAGATTCAGCTG  
 AAAAATTAATTAATAATAATATAATTTTATTAAATTAATAATAATAATAATAATATTAT  
 ATTATAATATATTTGAGTATACTTTATAATTAATATACTGACCAACCCATAAATTACTTTTGA  
 ATTCAATATCATGTTCTTCTACAGCTATCTTTTGTGCTTCTAAGATCACTTCTTTGGCTATAGC  
 TGCACCTTTTTTCTTTAAAAAACTCAATTGTTTAAACAGCTTCATCTACAGACATACCTCTTAC  
 AAAAGAAGCAATATACCACATTTTCAATGGACTATATTTTATGTTTTTTC

417. >MSTRG.8767.2 Gene=MSTRG.8767

AGAAAATTGAATTTCTTGATACTCACTTTATTTGCAATTCGAAATGTTCTAAATTTTGGTGAC  
 TTTTATATAGTGAAATTTTAATATTGGAAATCCTGTTTAATATATTGTGCAATCAATTTGGCC  
 ATTTTCGTCAGTTGCTATCCGAACAAAATGTCGGCTCATAAAACGTTTATTATCAAACGAAA  
 ACTTGCTAAGAAATTA AAAACAAAACAGACCGATTCCACAATGGGTCAGAATGCGAACTGG  
 CAATACTATTAGATATAATGCTAAACGCGCTCATTGGAGAAGAACCAAATTGAAACTGTAA  
 AATACATTTATGTATTTTCTCACATTTATTATAATATATTAATTATTCATTTTTAAATAAATTC  
 TAGTTGTAACATTATATTTACATCTTATATTATAAAAAATTTATTTTTTAATTAACACGAATTT  
 TATATCGATCAATAACCTCAGAAAGAAAACGAATTATTTATTTACATATATTTATATACATA  
 TTATAATGAATTAGATATTTTGGCGCGATGCATTTGTTCCATCCATTCTTTTAATAATTCTTCA  
 CCGCTTTTAGGTGCTGGTAAATAATAATTTTTTGGTGTTTTCCTTCTTCTAAACGTACA

418. >MSTRG.8790.2 Gene=MSTRG.8790

CTTAAGGGATAGGCTTGAAATATAAAAACCTGATAAAATTTAGTGGTTTGTAGTAAAAGTATA  
 ATAATAATT  
 TAAGTATCGTCAAGTGTTCATATTTTTGGAATTTATTATTAAAAATTGTATTTTCATAAAAAA  
 TTTTGTTGCCTTTATCTGTTATGGATATGGTGACTACGAATTTACAACAACAACGACAAATC

ACGGAGCAGCTACGACGTGAAGCTGCTTTAAAACGAATTACGGTTAGCAAAGCTGTCGAA  
 GATATCATGAAATATATCACAGAACACGAACAGGAAGATTATCTTTGCAGCAGGAATAG  
 ATTCTGCAATAAATATATCTTTGGGATCTGCAATGTCTAATATTCAACATGTTTATAAAATTC  
 AACAAGTTTATGGAATTCCTCTTTATGGATATCATGAGAAGAAACATTTATTTTTTAAAATTT  
 ATTTTTATAATCCAGCTATAATTAAACGAGCAGCTGATTTATTGCAAAATGGTA

419. >MSTRG.8817.1 Gene=MSTRG.8817

GTTGATAGGTATCACGATCAACTCGAAGACTCCCTTCATCCCCAGAGTCAAGATTTGGTGAT  
 TGGATATTTCTTGATATCCTTAAGGGACTAGAGAATTGGCGATTACGCGTGCTATCTATGGA  
 ACGTGGTGAATCAGTCACGGATCTATTCGCCATATCTTTGTTTTATCACAATCGTTTCCTAT  
 ATCGTTGGCTGGTTGATTATTATTATTGGCTGATCCAGCGTTCACGTTGTTGTTAATCGTGTT  
 GGAATTGTTAGTTTGTGTTGCAACGTTTGACTCAACAGTGAGGACCATTGCCTCATCACGT  
 CTTCCCCTTGGGCCTCCAATTCTGATAGAATGGTAGCGTTGTCCATATCCTGCAACGCCGTC  
 CCAGTGTCCGCTCGTTGCTCTTCGTAGGAGCTCGCGTCGCTGTGCTCGTAATCCAATATCAA  
 GTCATCGGAGGCGATAGACTCGCAAGGGGACAGAGTGTCACGCTCCCTGCTCGGCTCATT  
 CGTTTCCCGTGATGAGGGCTGTTGCTCGCGTTCTTTCCATGCCCGTTTTAGGGCTGGACTCG  
 ACCAGAGTGTGGCTGTTCTCGGTGACCGGTTGGCTAGCCACAGCTGACTGGGTCTCGCCCC  
 CTGCCCTCGAGTTGTCGTCGAAGACAAGGCCCGGTTGATCGGCTATCTCGTCGTCGAAGTA  
 CTCCCTGCCCTCCGACAAGCTCAACGAATTGGAAGCGTTGGTCGGGGTGCCGGGGCTGTGCG  
 TCGTCGATGATCGCCGTCCCCGACCCTTCCATCCCCGCCGTTCTCCTTCCTCGGCGTCCTCGTG  
 TCGGACTGGGTGATGCTGGCCGTCAGGCTGTGCAACAGGCTGTGACGGGCGACGTCTCGT  
 CGTCTATGAGGGCGGTGCGGGTGGCGGCCGCCGCCGCAACGCGGGATCCTCTATGGTGA  
 GGAGGACGGAGCGCAAGGCCGTTTTGGGCAGCGTCCCCCGGGCTTAGCCAGGTTCCGGT  
 GTTGGCCGTCGGAGGGCGGCCGTTGACACTCGTCGCTCGAGCTGAGCGAGTACTCGTCGGC  
 CATCGCCTCCCCGTGCCGTA CTGAGGATCGTCCGAGCTCGGGGGGCTGAAGTCCGACTTG  
 ATGGAGGGGATCTTCTCGGAACGCGACCTGTCTTGTAACCTTCTCCTCGCCCAACCCCTC  
 GTCGTAGCCCTCCGAGGAGGTGGTGGACATGGACGTGGTCGACTCGGTGTACCTGTTGTCCT  
 TGTTACGATCCTCTGGTACTGGGTCGCCCTCTCCCTCACCAGGCCGGTGCTCGCCGAGGTG  
 AACGTTTTTCGGCAAAGGTATCACGGATATCTCCGTCACGGTGCTGTGTCGTCGTCCTCACGTC  
 CCTCACGTCGAAGCTCTTCCCGCTCACAACCATCCTCAGGTTCTCAGCCTGCCGCCGCCGT  
 GCCTCCTCAACAGGGAACAACCGTCCCCGTAATCCCTCGACTCGTTCTCCCCGCACCCTTGC  
 TGGCTCCCGACCCCGGAATCCTCCGTGCTCGACCCCTCCTTCGAGCTCGTCGACCCCTTCGA  
 CGCGGCCGACACCTTCCTGCTCTGGTTGCGGGCGGTCTTCGCGATCTTCGAGTTCGCGTCCG  
 TCATCCTCACGGCGTATTGGGGCAACGGCAGGTGGCTCGTGTGAAGCGTGACCTGCCAC  
 GGGCTCCGGTATACCGGACGGCACCCTCTCCGATTCCCGTCCACGAGGCTCCCCCGTTG  
 AACGAGACCGTGTTGTGCACAGGGGACGATCTCTGCAGCTTGAAACTCGGCTGGCAGCCCC  
 TGTGCGGGGGCTGCTTCGCGAAACTGCCTTCCTGCTGCCGGCTCTCCTGGTTGTAGTGGCTC  
 GCCGTGTGGCTGCTGCACACGTCGCCCACCTTGTTGCTGAACCTCGCTGCCTGGGGCTGCTG  
 CTGCCTGTACCCGAACCGATTCTGTCCTACCGCGATCCCGCTCGACTCCTTCTTGGGGGGG  
 CGAGGCGGGGCGTGAGCGGCCGGAACCTCGAGCAATTCTGAAGCGTCAACGCCGGGTTTC  
 CGCCGCCGTTTTCTCGTCGCGCCTCCGGCTCTGCTCGGGCCCGGCCGATTCGATCGTTGGT  
 GGAGCGTGCCGCTCGCCTCGTAAGCGCCGCCGCTTATCGGCATCGGGATCCCGGAGGCCGG  
 CCTTCGCCGGAACCGAACGACATGGCCGTGCCGCGCGTGTCGTCGCCGCCGCGCTTCGAC

GCCCCCTTGTGCTCGTTCGCAACACCAATTCCCTTCTCGTTCTCCAGGGAATCATCCTCGCAC  
 CTGGTGCCAACAGACGACCGGTAATCCATGTCTTCGGGCCAGTGTACCCCGGCTGTTAAGA  
 AGACTGTATTCCCGATCGATCCCGGCGTCCAGCTTGCGAGAAAGTTACGTTAGTTTCTTCTA  
 AATCCGCAACGTCGTCATCCTGCACCGCTGTGCGTGAATATTTTAAACCGAGGGAGGCACG  
 GAGAGCCGAAATTTACACGGCTATGTTTTTTCAGCTCGAACAAACCTTCCCCGTATAATCTG  
 TCACCTCTTTCGGATGCTGTACGCGTTCAGCTCGTACGCGTTGTCGCCAAAAGACACGCGCA  
 CCAATACCTCCTCCGATTCTCCCTCTTCCGTCTCCCTAACCTCACTCCGTCTCTCACTCTGTG  
 ACTCTCTTCTTCCCTCACCGCTTCCCTCTCTCTTCTCTGAAGTTCACCCTCGCGCTCAATCC  
 TCGGCCAGCATACCCCTTTTCTTCTTCCGCCTGAGTTCGTGTGTGCTCGTCACTGTTTCGCG  
 TTTCTCGCCACTACACGGACAGGCCAAATCGTGGAATCGATTGACGGTACTGCGCCAGCG  
 CGGCGTCGCGACGCCACCGCACACTATCGTAACCACTCGCGCATAGGCTGCCAACGACTG  
 ATGTCACGAGTGCGCCCGCGCCGCGTTCGCTTTCGATGTATTTCTATATCTAAGTATTACG  
 CTTTTGTCGGCCTCCCTCTGTTTCCTATCTGTACAGTGACATGCACAAAAAGCGGACCATCA  
 AACTTAACCTTCTCATCCGGAAGGGCTCAATTCTTACCGTTTAAACGATCACGATGTAGTAT  
 GCACTCGTGTACCGTCCAGTTGATTCCGAGTAATCGCATTACCGACTGGTTTCACGTTTCGAA  
 TATTTTAGCAGAGTTTCTATGGATATACAATACCGGTGAATGTTTGTTACACAATTTTGAGA  
 AATCGTGAGAATAAAATATTTTATATATATATATATACTATTTTTTTTTTAATTGATTGCG  
 TTTGATGCCAATCTAAAAGACTTTCTAAGTTTCATCCTTTTTTTTTTTCTTTTTCTTTAAATTAT  
 ATGTATATACCTTTTCATAGGTACATTTACCCG

420. >MSTRG.8874.1 Gene=MSTRG.8874

GACGTGATATACAGATTATACAGAATTCAAAGAATTTCTTTTTCAAGATTATCAATTCATTA  
 ATGCATTTGCTAATTTAATGTCAATTTTTGTATTTCAATTGCAGTGTATCTTGATCGTCCATT  
 TCTTGTCACTATTAACTATTAACTATTAACTATTAACTATGTGAAAGATACAGAAGGT  
 GAAAGAAACGGTAGCATTGCATATCTAGATGCACTAACATCTGAGCGAAAGGGCTGCGCA  
 ATTTTATTTTTTCATCCACGAATAAGATAACGTGTGTAACCTCTAGGATGCACTCCAATGCGCA  
 TGCGATTTACGAATGGTGGGGAAATGATATTTTCCCTTCTCGGAAAAAGATATTCCATATT  
 TTTGGTCAAAGAGGAATATATACTCCTGTTTTAAAAAAGAAAAATGGGAAAACTTACTC  
 AAGAAGAACGAGAGAAAGATTTAAACCATTTATTATTTAACAATTGGTCTGTGCAACAAG  
 ATAGAGATGCTATTTACAAAGAATTTTTATTTAAAAATTTCAATCAGGCATTTGGTTTTATG  
 ACCAAAGTTGCATTGCAAGCAGAAAAAATGAATCATCATCCTGAATGGTTTAATGTTTACA  
 ATAAAGTAAACATTACTTTATCTTCTCACGATGTTAATGGTTTATCACAAGAGATATTAAG  
 CTTGCATCTTTTATAGATAACATTGCTAAAATGGAAGAAAACTAAGATTAAGAATATATGA  
 TTGGAATCATCATTAGGAGGTGGTTCTTTGCCAATAGCCCAAGCTTCTTTAATAGCTTTTGA  
 AACACCAGGACCATTATTTATAAGTAAAAATAATCCACATAATGTAATTGCTGAGAGGAA  
 AATCAATGAAAGATGCAAAAGTTTTGGTAATAGTGGTCCAACAACCTCTAGGACGTGCATAA  
 TCTGTAATAATAGCTTCCAGACCCCTATTTGAAATTTCAAGAAATAAATGAATTAACACATT  
 GTATATTGGAACACATTATTGAATTAATGAATTATAACATTGCATAAATATCATGATGATAA  
 AGTATGATTAATAACAAATTTTAAAAAATAATTCATGAATAATTACCAATGCATATGTATTA  
 CAATTAATAAGGACATTAAACCATCACAGATAACATTTTCCATCGTTAAAGCAACAGGTAT  
 TATAACTGGAAGTGCTGCTGAAGCAATTTTTCTAAAATCCACATACGTACATGATCACTTG  
 CAGTTGTACTTGTTTTGCGAGTTATTTCTGTATTTAGAATGATG

421. >MSTRG.8874.3 Gene=MSTRG.8874

CGCGCATGCGATTTACGAATGGTGGGGAAATGATATTTTCCCTTTCTCGGAAAAAGATATTC  
CATATTTTTGGTCAAAGAGGAATATATACTCCTGTTTTAAAAAAGAAAAAATGGGAAAAC  
TACTCAAGAAGAACGAGAGAAAAGATTTAAACCATTATTATTTAACAATTGGTCTGTGCA  
ACAAGATAGAGATGCTATTTACAAAGAATTTTTATTTAAAAATTTCAATCAGGCATTTGGTT  
TTATGACCAAAGTTGCATTGCAAGCAGAAAAAATGAATCATCATCCTGAATGGTTTAATGT  
TTACAATAAAGTAAACATTACTTTATCTTCTCACGATGTTAATGGTTTATCACAAAGAGATA  
TTAAGCTTGCATCTTTTATAGATAACATTGCTAAAATGGAAGAAAATAAGATTAAGAATA  
TATGATTGGAATCATCATTAGGAGGTGGTTCTTTGCCAATAGCCCAAGCTTCTTTAATAGCT  
TTTGAAACACCAGGACCATTATTTATAAGTAAAAATAATCCACATAATGTAATTGCTGAGA  
GGAAAAATCAATGAAAGATGCAAAAAGTTTTGGTAATAGTGGTCCAACAACCTCTAGGACGTG  
CATAATCTGTAATAATAGCTTCCAGACCCCAATGCATATGTATTACAATTAATAAGGACATT  
AAACCATCACAGATAACATTTTCCATCGTTAAAGCAACAGGTATTATAACTGGAAGTGCTG  
CTGAAGCAATTTTTTCTAAAATCCACATACGTACATGATCACTTGCAAGTTGTACTTGTGTTTGC  
GAGTTATTTCTGTATTTAGAATGATGGTATTTGTTGGAACTTCAATAATTGTCTTTCATTTTT  
ATTCAGACTAG

422. >MSTRG.8891.1 Gene=MSTRG.8891

GAGTACGTGAAACCGTTCAGGGGTAAACCTGAGAAACCCAAAAGATCGAATGGGGAGATT  
CATCGGCAACGGTGCTGGCTCCCGTTGGTGCGCGATGCTCCGGATGAATCCTCGTGGTTCAT  
CGGCGAGGGCACACCACCTTCGGCTCGAATGTTCCGGCATCGTAGTCGTGCACCTTCTCCCT  
AGTAGAACGTGCGGACCCGTTGTGTGTGCGTCTACGGCCCGAGAGGGCGCCTGTGCGGTCG  
CTTCGCGCGCACGCGGCAGACCCTCGGTGCGCTGGCCGGCTGCACGACGGTACTCGCACGG  
TATCGGGCCGCAACCAATCCATTTTTTCGAATGTCTGAACGGGGCGTGGTCTTGTACCTCGC  
ACCCCGGATCCGAGCTCGGTCCCGTGCTTGGCCTCCCGCGGATCTTCCTTGCTGCGAGGCT  
TCCGTGGCGGCTCTGCCGTGCTGGTCTCTCTCGGCCGCCATTCAACGCTCAGCTCAGAA  
CTGGCACGGACTAGGGG

423. >MSTRG.8895.3 Gene=MSTRG.8895

CGGCGGGAGTAACTATGACTCTTGGAATCAAATGCCTCGCTATTTTAGTAGCGGTAGCGCT  
CCGCCCCGCGCAGGAACCATTGACGCCGCCGTAGTGTGGGTGATTTTATATCCAACCAATCA  
CGTCAACTACGATCATTTGTAATCACCGACGGTACTTGGTAGGGGTACCACATGGGCATTCT  
TGCTCATTCCACAACGCCGCTCCATCATGGCAACAATTTAAAATATATATAAATTCTTAAG  
GTTTGACCGTATTCATATATATATATATATATTTAATATTACAACCATAAATCTTATATCGAG  
CCTTCTATTTGGTCTCAAAAGCAATACGTTGTCAGATCTTGTAGAACATCAGGAGTGAGCGG  
TTTGCTGTGGTATCCGTGCTTTGTGCCGCGGCGACAAACCAATACGCTGCTGCCTGTGCGAA  
AGCAATACGCTGCTGATTCTCGGATGCGGGTGTGACGGTCACGCAAAGCGATACGCTGGT  
GGGGTTTCAAAACAATACGGCGCTGGTGCTAAAAAGCATTATGCCGCTAACGGCTGGATTG  
TCGATCGCCGCTGCGGGGGCTAGTGGCGCACCCAGAGAGGTGCGACGCGCAAGCATTGGT  
TCTGTGCGAAGCGGAGTTCTTGAGAGTAATGGTTGCTGGGGGCACAAAGCGCAACATATAG  
CCTCTTATGCCTCAAGTCGTAGTTCGTACCTCCACGTGGTCCCGCTGGAATGCCTATCGACT  
CCTCCCCGGAGGATCATAGAGTTCGAAACCGGCTACGGCGAGGCAAGGGCGGTGAGGTGC  
ACACCGATGGGAAGCAGCGACCCCACTTACCCATAGCTAAGAGAGCAGGCGATCCGCCAA



CTGTCAGCACGAAATAAACTAATCATGTGTATACGAGGGAGGTTTTACAACGGGTACCTTG  
TGCCCGAACCGCCTGTAGGTATCACCTACATGCGTTAAAATGAATCTGATAACTGGCGGGT  
CGTTGACCCTCTCTGATGGGT

424. >MSTRG.8901.1 Gene=MSTRG.8901

CGTGGGATTATGCCTGAACGCCTCTAAGGCCGTATCCTTTCTAGTCAAAGATGGCAACGAT  
ATCTCTAGGAGTCTCGTGTGGGTCGAAAGGCTCAAAACAATGTGACACTACTAGGTGGCCG  
GCCCTCGTGACCGGTATCGCACGGGCCCCAGTTTGCCGTACGGGCGTCTTTGGATTCTGTCG  
TCGGGATCTCGCCGATCGACGGCCACGGCGCTCTAACGGTCGATCATGGGTACTCCAACCTT  
CGACGTCGAGACTCGGAATCGTCTGTAGACGACTTAGGTACCTGGCGGGGTGTTGTACTCG  
GTAGAGCAGTTACCACGCTGCGATCTGTTGAGACTCAGCCCTATGCTTGGGGATTCTGCTTG  
TCGGTTAGACGAGACCCACGGAATATAGTCAAGAAAATTATATGAAGAGGAGAGAGAGA  
GAGAGAGAGAGAAAGAAAGCAGAGAAAAGAGACGCAAGAGAAAAAATATACATCCAA  
CCAAAAACGAACAACAATGTAATGCACGCGAAGTATTATAGTAATAATACCCGTGTAAC  
ATACGTTGTAAACTACATGATAATATAATATATATTACACACATATATATAATATATAT  
TATATACATAGATATATAATATATTATTAATAAAAAAAAAATTTTTTTTTTTTTTAAATTTT  
CAGA  
AAGCAATACGCCGCTGGAACCTATAAAAAAAAAAAAAAAAAAATTTTAGCTGGT

425. >MSTRG.8917.1 Gene=MSTRG.8917

TTTTGAGCAAAATAATCCTAAGCGATGAAGCACATTTTCGATGGCCTTGTTAATTATCGTGT  
TTGCGGTTTGAACAACTCACGTGTGATTAGCAAAAAATAAATGCACCCACAACGTGTCACT  
GTTTGGTGCGGATTTTGGGAAGGAGGCATCATCGGACCATACTTTTTTGAGAATGAGCAACT  
AATTAAGCAGCAATCAGCTGTTAATGGTGCTCGATATCGCGACATGATAACACAATTTTTTC  
TGTCGAAATTGGATAATATTTATGTGACCAATATGTGGCTTCAACAAGGCGAAGCCACATG  
TCATACAGCCAATGAAACAATTTAATTACTGCATAAGACATTTCTGATCGTATACTCTCTC  
GTTTCGGTGATCAGAATTGGCCCCTAGATCATGTGATTTAACACCATTTGATTTCTTCTTATG  
GGATTATTTGAAGTCAAAGGTCTATGTCAACAATCCCATAACCACATATGCATTACAAGAG  
GAAATTAAATGTTGCATCAACGAAATTCAGCCATAATTATGCAGAAAGGTCATGAAAAATT  
TCTACAAAAGGATTTAACGCCGTTAGACTTTTTTTTTAGAATTTTTTGAAGTCTAAAGTTTATA  
CCAATAAGCCCATGATCATCTATATCTTGAAGGGAAAATTTCAACGTAATATCAATGAAAT  
TCAGTCACATTTATATAAAATGATCATGGAAAATTTCAATAAAAAGAGTGCATATGTATCAA  
AACCGTGGAACCATTTATCCGATATGCTATTCCATATATAATCGTATATTGTATACTTCAT  
GAATCAATAAAAAAATTTACAATTTTTTAATTGTAAACCTGCATTTTCAATGAAAATTATTTCTT  
GCATGAATTTTGG

426. >MSTRG.8919.1 Gene=MSTRG.8919

ATTTCTTACCGATCTTTCTCCACACTGCAGAGCCGCGGGTCGGTGTCTATGACCGAATGACT  
CTTGTGCGGCAAAGCGACCTATAGGGGGACGCTGGTGACCTGTGTGCATGGCTTGCCATGT  
GTACTTGTACGACTGAGCATCAACTTTTAGCCTCGAGCGATCGGGCATTTC AACACCTAA  
GGATATTAATTATAAATCCTTTAGGGCGTACGGGCGTGTGAATAGTTCTTTTCGACTTGCA  
ATACGGCACGTTTCGTATGATGAGCTTTGAGTTTGTAAAAGAGAAATGAGAGAGCACGCGG  
CAGACCCTCGGTGCGCTGGCCGGCTGCACGACGGTACTCGCACGGTATCGGGCCGCAACCA  
ATCCATTTTTTCGAATGTGTGTGCGTCAGGCCCGCCGCAAGCTCGGTCAGTTCTTACCCGGA

GGCACGGACCTGGTGCCGTCCCCGGGCCTGGCCAGCTGTTAGCAGGCGGTGTCCTTGGACT  
GGCCAAGACTCGAATTACCGGTCGGCGACGCTATTGCTTTGGGTACTCTCAGGACCCGTCTT  
GAAACACGGACCAAGGAGTCTAACATGTGCGCGAGTCATTGGGATGCAAAAACCTAAAGG  
CGAAATGAAAGTGAAGATCGGACTTTGTGCCGATCGAGGGAGGA

427. >MSTRG.8921.1 Gene=MSTRG.8921

CAGCGGGTAATCTCGCCTACTCTGAGGTCGTCTTTCTACGTATAAGCGAAAAATATATTTTC  
GCGACATGTAGCGTGTACCAATGAGAAGAATAAGAAAGAAAGTTAACGAGAGAAGGTTAT  
TTTTTCTCTCCTTTCTTTTCCATCCCTCTTTTTAAAAATTAAATTTCGAATAGAGGGAAGAAA  
AAAAAGAGAAAAAATAATCGAAATGGAAGAAGAATTTTTCTCACTCGAATATTACC  
CACCATCGTATTACCCCTTGACTTCGCTAGATATATCTCTCTTTTCTTTTCTTTTCAAAAA  
AGCAACAAGAGTATTATATACATTGCGAAGAAGAAGAATATTCCTCCTTTTAGCAATCGTA  
GTGTTTTAAATATGCACCGCACCATAGTGCCAATTATCGTATGTCGTATTCATGTTAGAGCC  
AAGACTCACGCAAGATATCCGAATGTGCGTTTCGTTTTAACGCCCCGTCTCTATTTTAGCTTC  
CCGTTGACAATTTCCAGCGGTTTCTACTACTTTTTTTAAAAAACCTCGGGTAAAGTGAGGTA  
AAGTGAGAACTCACGCAAGGAAAAATATCACGAGAGCCTTTTCCGGGGACTGGACGACC  
GACATGGATACGCGGTCCGGCGATAGACAACGAAAAAGGCATGGGATGACCAACACTAG  
ATTCAGGAATTTCTCCTCGGCGCGGAGATGCCATAATTTGTCGTCTCGAAAAGAAGAAAAA  
AAAAAAAAAAGAAAAAGAATGAAAGAGCCTCGCCAAAGAGAATCGTACTCGTCCTCA  
TCTTACGTATCCCTTATATCCTCGTGGAGTCTTCGATCTCTGATACGAAAACCTGGTATCGCTT  
AAGGACTCGCGTGCACGTTGATGTGACGGTCCAGCGACAGTTCGACAGAGTATGACAAA  
CACGAAGGAACGGAGTGGGTATTCCGATTCTGGGGCTCTTTTCTCTCTCTCTCTCTCTCT  
CTCTCTTTCTCACAATCTCAACGCACGGCAAACATCGCACGCCATCAAGGGATGGTGGGAT  
CTTTCTCCCTCCTCTCTCGATTAAACTCCCATATATTTTTATCCTTTTTCTCACGGTATCGCA  
GAAATATTAGTTTCAGACGACGTTAGGGGCGCGGTATGTAATTCGTGATCCAAAAATGGAC  
GAATCGAAACAGTGGCGGGTACGAAAAACAAGCACGAAGCGGTGAACACGGGCGGTTCAT  
CAGTTATATGAAACGGACGACTCACGACACCGAGAACACTCACGCAAGTCCGTGACATGT  
CTTGAATTCGTGAATACGATTTCTCGTACCACACGCGAGCACATGTATTTTCGATTCTGTTAT  
CTCGGTCACGACCGCGACGAACGCCAACGAACGTCCAACAATCGCTCGTACGTCGCGCAT  
CTTCTTCTCCTTATAATTTGTCCAACCTCCGATTTTTGACACCCGACTCGGAAACGTTTCGATTT  
TGTGTCTGGTAAAATTCAAAAATATATAAATTCAAAAAAAAAAAAAAAAAATGATAAATCAAT  
CGGATACAACGGACGGAAGGGATTTTTCTCTCCCTCCTCACGTAAGCCATCGTTCCGTGATT  
TCATCATTCGTTTCATATGTTTCGATATACAAAGTTTTGGTATTTGATAATGGATTCAAAAAATC  
CATTTTATAAATATATATATAAATATATATATTTATCATCCCTTCTTTCAATTCTCTGTTG  
TTTTGTTACGCATTTTCTCTTTTTGTATGTTTCATTTCGTTAATGATCCTTCCGCAGG

428. >MSTRG.8927.1 Gene=MSTRG.8927

TCGAACGCACATTGCGGTCCACGGATACAATTCCTGGACCACGCCTGGCTGAGGGTTCGTTT  
ACGTAACCCAAATACTGCTTGCCTTGCCTATTGGTTATTCTTCGTACATTTGATCCTTTTCTC  
CTTCTTTTTGTAATCCCCGCCGTGCTTCTTAAAATCGAACGTTTCCGAGTCGGGTGTCAAAA  
ATCGGAGTTGGACAAATTATAAGGAGAAGAAGATGCGCGACGTACGAGCGATTGTTGGAC  
GTTTCGTTGGCGTTCGTGCGGGTCGTGACCGAGATAACAGAATCGAAATACATGTGCTCGCG  
TGTGGTACGAGGAAATCGTATTCACGAATTCAAGACATGTCACGGACTTGCGTGAGTGTTT

TCGGTGTCTGAGTCGTCCGTTTCATATAACTGATGACCGCCCGTGTTCACCGCTTCGTGCTT  
 GTTTTTCGTACCCGCCACTGTTTCGATTTCGTCCATTTTTGGATCACGAATTACATACCGCGCC  
 CCTAACGTCGTCTGAACTAATATTTCTGCGATACCGTGAGAAAAAGGATAAAAAATATATG  
 GGAGTTTAATCGAGAGAGGAGGGAAGAAAGATCCCACCATCCCTTGATGGCGTGCGATGT  
 TTGCCGTGCGTTGAGATTGTGAGAAAGAGAGAGAGAGAGAGAGAGAGAGAGAGAGAAAA  
 GAGCCCCAGGAATCGGAATACCCACTCCGTTTCCTTCGTGTTTGTCTACTCTGTTCGGAAGT  
 TCGCTGGACCGTCACATCAACGTGCACGCGAGTCCTTAAGCGATACCAAGTTTTCGTATCAG  
 AGATCGAAGACTCCACGAGGATATAAGGGATACGTAAGATGAGGACGAGTACGATTCTCT  
 TTGGCGAGGCTCTTTTATTCTTTTTCTTTTTTTTTTTTTTTTTTTTTTTTTCTTCTTTTCGAGACGACAAATT  
 ATGGCATCTCCGCGCCGAGGAGAAATTCCTGAATCTAGTGTGGTTCATCCCATGCCTTTTTTC  
 GTTGTCTATCGCCGACCGCGTATCCATGTCCGTCGTCCAGTGTCTTAAGATCATACACACA  
 AACATATAAAAAATTGAAATATGAGACCAGAAACACACCCATTGGGCGAAAGGGAATCCG  
 GTTCCTATTCCGGAACCCGGCAGCGGAACCGCATACCAATTCGGGCCCTCGTAAGAGTGTTT  
 GTCGGGGTAACCCAAAATGACCTGGAGACGCCGTCCGGAGATCCGGGAAGAGTTTTCTTTT  
 CTGTATAAGCGTTCGAGTTCCCTGGAAACCTCTAGCAGGGAGATAGGGTTTGGAACGCGAA  
 GAGCACCGCAGTTGCGGCGGTGTCCGGATCTTCCCCTCGGACCTTGAAAATCCAGGAGAGG  
 GCCACGTGGAGGTGTGCGCGCCGGTTTCGTACCCATATCCGCAGCAGGTCTCCAAGGT

429. >MSTRG.8930.2 Gene=MSTRG.8930

GTCGTCTTTCTACGTATAAAGCGAAAAATATATTTTCGCGACATTGTAGCGTGTACCAATGA  
 GAAGAATAAGAAAGAAAGTTAACGAGAGAAGGTTATTTTTCTCTCCTTTTCCATCC  
 CTCTTTTAAAAATTAAATTCGAATAGAGGGAAGAAAAAAGAGAAAAAAGAAAAA  
 TCGAAATGGAAGAAGAATTTTCTCACTCGAATATTACCCACCATCGTATTACCCCTTGAC  
 TTCGCTAGATATATCTCTCTTTTCTTTTCTTTTTTCCGGGGACTGGACGACCGACATGGATAC  
 GCGGTCCGGCGATAGACAACGAAAAAGGCATGGGATGACCAACACTAGATTCAGGAATTT  
 CTCCTCGGCGCGGAGATGCCATAATTTGTCGTCTCGAAAAGAAGAAAAAAGAAAAA  
 AAGAAAAAGAATGAAAGAGCCTCGCCAAAGAGAATCGTACTCGTCCTCATCTTACGTATC  
 CCTTATATCCTCGTGGAGTCTTCGATCTCTGATACGAAAAGTGGTATCGCTTAAGGACTCGC  
 GTGCACGTTGATGTGACGGTCCAGCGACAGTTCGACAGAGTATGACAAACACGAAGGAA  
 CGGAGTGGGTATTCCGATTCCTGGGGCTCTTTTCTCTCTCTCTCTCTCTCTCTCTCTCTT  
 CTCACAATCTCAACGCACGGCAAACATCGCACGCCATCAAGGGATGGTGGGATCTTTCTTC  
 CCTCTCTCTCGATTAAACTCCCATATATTTTTATCCTTTTTCTCACGGTATCGCAGAAATATT  
 AGTTTCAGACGACGTTAGGGGCGCGGTATGTAATTCGTGATCCAAAAATGGACGAATCGAA  
 ACAGTGGCGGGTACGAAAAACAAGCACGAAGCGGTGAACACGGGCGGTATCAGTTATAT  
 GAAACGGACGACTCACGACACCGAGAACACTCACGCAAGTCCGTGACATGTCTTGAATTC  
 GTGAATACGATTTCTCTGTACACACGCGAGCACATGTATTTTCGATTCTGTTATCTCGGTCA  
 CGACCGCGACGAACGCCAACGAACGTCCAACAATCGCTCGTACGTGCGCATCTTCTTCTC  
 CTTATAATTTGTCCAACCTCCGATTTTTGACACCCGACTCGGAAACGTTTCGATTTTAAGAACG  
 ACGGCGGGGATTACAAAAAGAAGGAGAAAAAGGATCAAATGTACGAAGAATAACCAATAC  
 GCAACGCAAGCAGTATTTGGGTACGTGAACGACCTCAGCCAGGCGTGGTCCAGGAATTG  
 TATCCGTGGACCGCAATGTGCGTTCGAAATGTGATGTTTCATGTGTCCTGCAGTTCACACGT  
 TGACGCGCAATTAGCTGCGTTCTTC

430. >MSTRG.8930.1 Gene=MSTRG.8930

[illegible]

431. >MSTRG.8930.3 Gene=MSTRG.8930

432. >MSTRG.8931.1 Gene=MSTRG.8931

277

AAATTTGATACGAAGAGAGAAATTCTTTCTCTTTCCACGAGAGAGAGAGAGATATATAAAC  
GATAAATACGAAGAGGCGCTTGCGCGAAGGTCGTTTATTATAAATAAATAGACCCGCCGTC  
TCGATGAGATGAATGTTATGGTACGCAAAAATACAAAGGGACGCTTGCGTGAGATCGTCGT  
CGCGTCGTCGTATATATTTTATATATATATATATACACACATGTACGGACGATCCGCCGTCT  
CGATGATGTATATTTTAAATAAAGATTTGACGGTACGTTTTGCACGTACGTGTACGTATTAC  
GTATGTATACGCATAATAATATATACGAAATAATAATCAAAAGGAAGCGCTTGCGTGAGGT  
CTTTTGTAATAGACCCGCCGCTTTTATGAACGTATATACGTGCGTTACGTATGTGTATGTACA  
TCGATACGTGCAGTAAAAGTACCAAGTTCATATTTCTGTGCATTTCTCTTCTTTATTTTCG  
TTGCCTGAGCTCTCCTCTTATATAAAAACGAGAGATGGACGAGGAGACGCAACGCACCAA  
GACTTTGGGATCGAACGAAGCTGTCGAGATATGAGAAAGAGAAAAAGCGATAAGGGGAC  
AAGTAGCGCGTCGATAGTAAAACGAAATCGAAGGATGGACGAGCCGCCGTCGAACTTTGT  
TTCGCGACGTTCTCTTCGATGGATACCAGTTCGACCTCTTTTCTCCTATACGCTTCTATGATC  
ATTCTCGAATCGTGCTTCCTACCCATGGTGTGTCGTGTCGTGTCGTTGTACCTTTAAACCGAC  
GAAACCAAGAACGGCGAGAAAATGATGCATCGCGTCGACGTGAGCCCGTTTCATCGCTTCT  
TACTTAAAAAAGTTGAAACGTTATTCGTTTCAGAGGGGAATATCGAATCTGTGTTACACAGA  
GAGAGAAGAGAGGTCGTCGTGTCGTGAGTCGGACACCCGTACCGTAGCGAATATTCGCTTC  
GGAAATTGGGAGGAAAGACCGCTCGAGACCGATCGAATTTTTTCGTGTCCCATCGATCTTTT  
CGAATCTTTTCATCGAGATATACGTACCTGAACGAATTATTAGTTTTCAACATCGAATTTTTT  
TTAAGCGTATGGGCTCTGCGACCATGCTTCGAACGAGTCGTTCTCTCCAGGTTGAGCGACGG  
TTTGAAGAGAAGAGAGAGAGAAAAAGGATTCAGTATCGGGGTAA

**Table S7.** Information of target genes regulated by DElncRNAs from the intersection of NDB-vs-EDB and NDB-vs-LDB via the cis-regulatory mechanism.

| lncRNA_ID      | Gene_ID        | up/down_Stream | distance | Symbol    | Description                                                                           |
|----------------|----------------|----------------|----------|-----------|---------------------------------------------------------------------------------------|
| XR_003304701.1 | ncbi_408855    | DOWNSTREAM     | 4373     | Esrra     | PREDICTED: estrogen-related receptor isoform X1 [Apis mellifera]                      |
| XR_003304701.1 | ncbi_100578476 | UPSTREAM       | 1368     | --        | PREDICTED: uncharacterized protein LOC100578476 [Apis mellifera]                      |
| XR_001703122.2 | ncbi_102656766 | DOWNSTREAM     | 5850     | ato       | PREDICTED: ETS-like protein pointed [Apis mellifera]                                  |
| XR_001703122.2 | ncbi_100577107 | UPSTREAM       | 5682     | --        | PREDICTED: uncharacterized protein LOC100577107 [Apis mellifera]                      |
| XR_001703122.2 | ncbi_725215    | UPSTREAM       | 5704     | ACPP      | PREDICTED: venom acid phosphatase Acph-1-like [Apis mellifera]                        |
| XR_003305156.1 | ncbi_724225    | UPSTREAM       | 2975     | SPR       | PREDICTED: sex peptide receptor-like isoform X1 [Apis mellifera]                      |
| XR_003305156.1 | ncbi_411290    | UPSTREAM       | 8091     | SOCS3     | Suppressor of cytokine signalling 2 [Melipona quadrifasciata]                         |
| XR_003305156.1 | ncbi_412161    | DOWNSTREAM     | 1089     | br        | PREDICTED: nucleus accumbens-associated protein 2-like isoform X1 [Bombus terrestris] |
| XR_003305473.1 | ncbi_725877    | DOWNSTREAM     | 2901     | bca-1     | PREDICTED: beta carbonic anhydrase 1 isoform X1 [Apis mellifera]                      |
| XR_003305473.1 | ncbi_724408    | DOWNSTREAM     | 6133     | Rraga     | PREDICTED: ras-related GTP-binding protein A [Apis mellifera]                         |
| MSTRG.6803.3   | ncbi_725781    | UPSTREAM       | 4161     | Vps50     | PREDICTED: syndetin [Apis mellifera]                                                  |
| MSTRG.6803.3   | ncbi_409241    | DOWNSTREAM     | 259      | EAG_01737 | PREDICTED: prohormone-4 [Apis mellifera]                                              |
| MSTRG.6803.3   | ncbi_411861    | DOWNSTREAM     | 390      | Nkrf      | PREDICTED: NF-kappa-B-repressing factor [Apis mellifera]                              |
| MSTRG.6803.3   | ncbi_411862    | UPSTREAM       | 3218     | MRPS2     | PREDICTED: 28S ribosomal protein S2, mitochondrial [Apis mellifera]                   |
| MSTRG.6803.3   | ncbi_411863    | DOWNSTREAM     | 4737     | DHRS7     | PREDICTED: dehydrogenase/reductase SDR family member 7 [Apis mellifera]               |
| MSTRG.6803.3   | ncbi_409636    | DOWNSTREAM     | 7656     | --        | PREDICTED: phospholipid scramblase 1-like isoform X1 [Eufriesea mexicana]             |
| MSTRG.6803.3   | ncbi_409634    | UPSTREAM       | 9434     | --        | PREDICTED: LOW QUALITY PROTEIN: protein PFC0760c [Apis florea]                        |

Note: EDB referred to the wagging dancers after foraging on a feeder with 1.5 M sucrose solution in the first phase. NDB referred to the non-dancing bees after foraging on another feeder with 0.5 M sucrose solution replacing the feeder with 1.5 M sucrose solution in the second phase. LDB referred to the wagging dancers after foraging on the feeder with 1.5 M sucrose solution replacing the feeder with 0.5 M sucrose solution in the third phase.

**Table S8.** Information of target genes regulated by DElncRNAs from the intersection of QB-vs-EDB and QB-vs-LDB via the cis-regulatory mechanism.

| lncRNA_ID      | Gene_ID        | up/down_Stream | distance | Symbol    | Description                                                                              |
|----------------|----------------|----------------|----------|-----------|------------------------------------------------------------------------------------------|
| XR_001706449.2 | ncbi_107966053 | DOWNSTREAM     | 359      | --        | PREDICTED: uncharacterized protein<br>LOC107966053 isoform X1 [Apis mellifera]           |
| XR_001706449.2 | ncbi_412412    | UPSTREAM       | 3317     | Mfap1a    | PREDICTED: microfibrillar-associated protein<br>1-like isoform X1 [Apis dorsata]         |
| XR_001706449.2 | ncbi_726766    | DOWNSTREAM     | 5242     | dicer1    | PREDICTED: LOW QUALITY PROTEIN:<br>endoribonuclease Dicer [Apis mellifera]               |
| XR_001706449.2 | ncbi_725976    | DOWNSTREAM     | 61       | FKBP46    | PREDICTED: 46 kDa FK506-binding nuclear<br>protein [Apis mellifera]                      |
| MSTRG.1195.1   | ncbi_412003    | UPSTREAM       | 4307     | RasGAP1   | PREDICTED: LOW QUALITY PROTEIN: ras<br>GTPase-activating protein 3 [Apis mellifera]      |
| MSTRG.1195.1   | ncbi_727456    | DOWNSTREAM     | 4590     | YMR099C   | PREDICTED: glucose-6-phosphate 1-<br>epimerase [Apis mellifera]                          |
| NR_003565.1    | ncbi_408663    | UPSTREAM       | 8140     | SCM-1     | PREDICTED: soma ferritin [Apis mellifera]                                                |
| NR_003565.1    | ncbi_410815    | UPSTREAM       | 5705     | wupA      | PREDICTED: troponin I isoform X1 [Apis<br>mellifera]                                     |
| XR_003304726.1 | ncbi_408827    | DOWNSTREAM     | 4023     | ca2       | PREDICTED: carbonic anhydrase 1 [Apis<br>mellifera]                                      |
| XR_003305156.1 | ncbi_724225    | UPSTREAM       | 2975     | SPR       | PREDICTED: sex peptide receptor-like isoform<br>X1 [Apis mellifera]                      |
| XR_003305156.1 | ncbi_411290    | UPSTREAM       | 8091     | SOCS3     | Suppressor of cytokine signalling 2 [Melipona<br>quadrifasciata]                         |
| XR_003305156.1 | ncbi_412161    | DOWNSTREAM     | 1089     | br        | PREDICTED: nucleus accumbens-associated<br>protein 2-like isoform X1 [Bombus terrestris] |
| MSTRG.6803.3   | ncbi_725781    | UPSTREAM       | 4161     | Vps50     | PREDICTED: syndetin [Apis mellifera]                                                     |
| MSTRG.6803.3   | ncbi_409241    | DOWNSTREAM     | 259      | EAG_01737 | PREDICTED: prohormone-4 [Apis mellifera]                                                 |
| MSTRG.6803.3   | ncbi_411861    | DOWNSTREAM     | 390      | Nkrf      | PREDICTED: NF-kappa-B-repressing factor<br>[Apis mellifera]                              |
| MSTRG.6803.3   | ncbi_411862    | UPSTREAM       | 3218     | MRPS2     | PREDICTED: 28S ribosomal protein S2,<br>mitochondrial [Apis mellifera]                   |
| MSTRG.6803.3   | ncbi_411863    | DOWNSTREAM     | 4737     | DHRS7     | PREDICTED: dehydrogenase/reductase SDR<br>family member 7 [Apis mellifera]               |
| MSTRG.6803.3   | ncbi_409636    | DOWNSTREAM     | 7656     | --        | PREDICTED: phospholipid scramblase 1-like<br>isoform X1 [Eufriesea mexicana]             |
| MSTRG.6803.3   | ncbi_409634    | UPSTREAM       | 9434     | --        | PREDICTED: LOW QUALITY PROTEIN:<br>protein PFC0760c [Apis florea]                        |

Note: EDB referred to the wagglng dancers after foraging on a feeder with 1.5 M sucrose solution in the first phase. LDB referred to the wagglng dancers after foraging on the feeder with 1.5 M sucrose solution replacing the feeder with 0.5 M sucrose solution in the third phase. QB referred to quiescent bees on the comb after removing the feeder for 1 hour in the fourth phase.



**Table S9.** Top 20 of GO terms enrichment analysis of target genes regulated by DElncRNAs from the intersection between QB-vs-EDB and QB-vs-LDB via the cis-regulatory mechanism.

| GO term (level 2)                         | number of genes | P-value     | Gene ID     |
|-------------------------------------------|-----------------|-------------|-------------|
| iron ion binding                          | 1               | 0.00366888  | ncbi_408663 |
| cellular transition metal ion homeostasis | 1               | 0.003985824 | ncbi_408663 |
| transition metal ion homeostasis          | 1               | 0.005312075 | ncbi_408663 |
| cellular chemical homeostasis             | 1               | 0.006637147 | ncbi_408663 |
| cellular cation homeostasis               | 1               | 0.006637147 | ncbi_408663 |
| cellular metal ion homeostasis            | 1               | 0.006637147 | ncbi_408663 |
| cellular ion homeostasis                  | 1               | 0.006637147 | ncbi_408663 |
| metal ion homeostasis                     | 1               | 0.009283761 | ncbi_408663 |
| transition metal ion transport            | 1               | 0.009283761 | ncbi_408663 |
| inorganic ion homeostasis                 | 1               | 0.013244862 | ncbi_408663 |
| cation homeostasis                        | 1               | 0.013244862 | ncbi_408663 |
| ion homeostasis                           | 1               | 0.013244862 | ncbi_408663 |
| chemical homeostasis                      | 1               | 0.013244862 | ncbi_408663 |
| cellular homeostasis                      | 1               | 0.023756147 | ncbi_408663 |
| homeostatic process                       | 1               | 0.032892061 | ncbi_408663 |
| metal ion transport                       | 1               | 0.041970798 | ncbi_408663 |
| regulation of GTPase activity             | 1               | 0.045844228 | ncbi_412003 |
| regulation of biological quality          | 1               | 0.053559736 | ncbi_408663 |
| regulation of hydrolase activity          | 1               | 0.059957464 | ncbi_412003 |
| regulation of catalytic activity          | 1               | 0.068865751 | ncbi_412003 |

Note: EDB referred to the wagging dancers after foraging on a feeder with 1.5 M sucrose solution in the first phase. LDB referred to the wagging dancers after foraging on the feeder with 1.5 M sucrose solution replacing the feeder with 0.5 M sucrose solution in the third phase. QB referred to quiescent bees on the comb after removing the feeder for 1 hour in the fourth phase.

**Table S10.** Top 20 of KEGG pathway enrichment analysis of target genes regulated by DElncRNAs from the intersection between QB-vs-EDB and QB-vs-LDB via the cis-regulatory mechanism.

| Pathway                       | number of genes | P-value    | Gene ID     |
|-------------------------------|-----------------|------------|-------------|
| Nitrogen metabolism           | 1               | 0.02306483 | ncbi_408827 |
| Ferroptosis                   | 1               | 0.03065387 | ncbi_408663 |
| Mineral absorption            | 1               | 0.03631336 | ncbi_408663 |
| Necroptosis                   | 1               | 0.08782041 | ncbi_408663 |
| Glycolysis / Gluconeogenesis  | 1               | 0.09140989 | ncbi_727456 |
| MicroRNAs in cancer           | 1               | 0.1109424  | ncbi_726766 |
| Ras signalling pathway        | 1               | 0.126662   | ncbi_412003 |
| MAPK signalling pathway - fly | 1               | 0.14044    | ncbi_412003 |

|                    |   |           |             |
|--------------------|---|-----------|-------------|
| Ribosome           | 1 | 0.2130234 | ncbi_411862 |
| Metabolic pathways | 1 | 0.8345884 | ncbi_727456 |

Note: EDB referred to the wagging dancers after foraging on a feeder with 1.5 M sucrose solution in the first phase. LDB referred to the wagging dancers after foraging on the feeder with 1.5 M sucrose solution replacing the feeder with 0.5 M sucrose solution in the third phase. QB referred to quiescent bees on the comb after removing the feeder for 1 hour in the fourth phase.

**Table S11.** Top 20 of GO terms enrichment analysis of target genes regulated by DElncRNAs in QB-vs-NDB via the cis-regulatory mechanism.

| GO term (level 2)                                  | number of genes | P-value     | Gene ID                  |
|----------------------------------------------------|-----------------|-------------|--------------------------|
| sulfate transport                                  | 2               | 0.000529056 | ncbi_413934; ncbi_724952 |
| sulfur compound transport                          | 2               | 0.00073805  | ncbi_413934; ncbi_724952 |
| inorganic anion transport                          | 2               | 0.001905713 | ncbi_413934; ncbi_724952 |
| inorganic anion transmembrane transporter activity | 2               | 0.002198829 | ncbi_413934; ncbi_724952 |
| glutamine family amino acid biosynthetic process   | 1               | 0.006205674 | ncbi_408859              |
| ER-nucleus signalling pathway                      | 1               | 0.006205674 | ncbi_411459              |
| proline biosynthetic process                       | 1               | 0.006205674 | ncbi_408859              |
| lipid binding                                      | 2               | 0.006448893 | ncbi_408855; ncbi_411459 |
| alcohol binding                                    | 1               | 0.007342818 | ncbi_411459              |
| sterol binding                                     | 1               | 0.007342818 | ncbi_411459              |
| steroid binding                                    | 1               | 0.007342818 | ncbi_411459              |
| anion transport                                    | 2               | 0.00769749  | ncbi_413934; ncbi_724952 |
| anion transmembrane transporter activity           | 2               | 0.008894474 | ncbi_413934; ncbi_724952 |
| sterol metabolic process                           | 1               | 0.012375572 | ncbi_411459              |
| cellular transition metal ion homeostasis          | 1               | 0.018509885 | ncbi_408663              |
| steroid metabolic process                          | 1               | 0.018509885 | ncbi_411459              |
| macromolecule catabolic process                    | 2               | 0.018934091 | ncbi_409985; ncbi_550794 |
| organic substance catabolic process                | 2               | 0.022134527 | ncbi_409985; ncbi_550794 |
| transition metal ion homeostasis                   | 1               | 0.024608803 | ncbi_408663              |
| proline metabolic process                          | 1               | 0.024608803 | ncbi_408859              |

Note: NDB referred to the non-dancing bees after foraging on another feeder with 0.5 M sucrose solution replacing the feeder with 1.5 M sucrose solution in the second phase. QB referred to quiescent bees on the comb after removing the feeder for 1 hour in the fourth phase.

**Table S12.** Top 20 of KEGG pathway enrichment analysis of target genes regulated by DElncRNAs in QB-vs-NDB via the cis-regulatory mechanism.

| Pathway             | number of genes | P-value    | Gene ID     |
|---------------------|-----------------|------------|-------------|
| Nitrogen metabolism | 1               | 0.04564107 | ncbi_725877 |
| Ferroptosis         | 1               | 0.06042512 | ncbi_408663 |

|                                                           |   |            |             |
|-----------------------------------------------------------|---|------------|-------------|
| Mineral absorption                                        | 1 | 0.07137506 | ncbi_408663 |
| beta-Alanine metabolism                                   | 1 | 0.0822079  | ncbi_552823 |
| Propanoate metabolism                                     | 1 | 0.08936531 | ncbi_552823 |
| Endocrine and other factor-regulated calcium reabsorption | 1 | 0.0929248  | ncbi_411147 |
| Arginine and proline metabolism                           | 1 | 0.0929248  | ncbi_408859 |
| Fanconi anemia pathway                                    | 1 | 0.1140152  | ncbi_411121 |
| Bacterial invasion of epithelial cells                    | 1 | 0.1346553  | ncbi_724158 |
| Synaptic vesicle cycle                                    | 1 | 0.1380521  | ncbi_411147 |
| Shigellosis                                               | 1 | 0.1380521  | ncbi_724158 |
| Proteasome                                                | 1 | 0.1481694  | ncbi_550794 |
| Necroptosis                                               | 1 | 0.1680782  | ncbi_408663 |
| Progesterone-mediated oocyte maturation                   | 1 | 0.1746191  | ncbi_724158 |
| Biosynthesis of amino acids                               | 1 | 0.1811128  | ncbi_408859 |
| RNA degradation                                           | 1 | 0.2066221  | ncbi_552826 |
| Peroxisome                                                | 1 | 0.2159988  | ncbi_552823 |
| AMPK signalling pathway                                   | 1 | 0.2191017  | ncbi_552823 |
| Oocyte meiosis                                            | 1 | 0.2314011  | ncbi_724158 |
| Cell cycle                                                | 1 | 0.2701582  | ncbi_724158 |

Note: NDB referred to the non-dancing bees after foraging on another feeder with 0.5 M sucrose solution replacing the feeder with 1.5 M sucrose solution in the second phase. QB referred to quiescent bees on the comb after removing the feeder for 1 hour in the fourth phase.
